# Supplementary material for: Concordant Regulation of Translation and mRNA Abundance for Hundreds of Targets of a Human microRNA
Source: PLoS Biol. 2009 Nov 10;7(11):e1000238. doi: 10.1371/journal.pbio.1000238 (PMC2766070; doi:10.1371/journal.pbio.1000238)
Supplement: Dataset S3 — Ribosome number values from miR-124 and mock-transfected cells and SAM results. (6.48 MB XLS) [file pbio.1000238.s003.xls]

## Sheet: Ribosome_number_input
gene_id	entrez_id	HOAD.191_mock_1	HOAD.238_mock_2	HOAD.205_mock_3	HOAD.197_mir124_1	HOAD.207_mir124_2
		1	1	1	2	2
hSQ000006	51592	8.35221	9.11029	8.37494	9.45614	7.99056
hSQ000008	repname(hSQ000008)	2.47748	3.12949	3.31148	3.48984	3.33
hSQ000011	220042	4.63955	4.50016	4.37735	4.44678	4.09039
hSQ000012	55100	8.3629	8.90688	8.26948	8.20515	7.48537
hSQ000030	10657	10.4251	10.4377	10.9102	9.60962	10.1155
hSQ000031	11056	7.8537	7.8786	7.92427	8.2647	8.17669
hSQ000034	582	4.96123	5.09051	5.39674	5.36532	5.1963
hSQ000037	3145	5.21726	5.80285	5.47663	6.24674	5.96964
hSQ000038	400961	3.39615	3.78789	4.35504	3.51172	3.29748
hSQ000039	repname(hSQ000039)	5.19616	4.71038	6.06667	6.85916	5.68004
hSQ000040	607	5.9825	5.25486	6.18732	5.6111	5.09591
hSQ000042	26995	5.31623	6.85326	5.4524	6.05779	6.18181
hSQ000044	51250	5.30443	6.53636	5.34926	5.72711	5.84533
hSQ000050	157570	5.89965	7.71855	6.58817	7.7376	7.34969
hSQ000068	6659	8.08766	7.82664	8.44194	8.97648	7.47859
hSQ000072	79135	5.46117	6.46921	6.0166	6.00927	5.68122
hSQ000073	10098	4.40045	5.52973	5.17098	6.00532	6.02562
hSQ000074	2888	3.15182	3.7218	3.59808	4.11253	3.37847
hSQ000081	10914	4.38372	4.57237	4.30705	4.27364	4.41981
hSQ000082	148423	4.00338	4.1736	3.90167	3.98749	3.98271
hSQ000085	79191	5.18956	5.9574	5.73896	5.70695	5.03306
hSQ000086	115201	4.59867	4.97101	3.71247	4.72173	4.79641
hSQ000087	10144	4.273	5.84776	4.46678	5.59807	4.48398
hSQ000093	1317	6.00029	6.36099	5.17366	6.38133	5.43318
hSQ000095	55871::150472	2.84478	2.53491	3.03758	3.13854	3.16408
hSQ000097	119032	2.58069	2.90521	2.92061	3.39492	3.08938
hSQ000098	55840	5.20486	5.29721	5.63673	5.90075	5.73195
hSQ000100	7733	4.14415	4.34407	4.87399	4.95308	4.40096
hSQ000102	85363	6.30649	7.27932	7.09185	7.38747	5.92443
hSQ000103	26973	7.50044	7.87148	7.15777	7.26039	6.66637
hSQ000113	392239::389644	7.86478	8.08699	8.69931	8.82353	6.78831
hSQ000114	56927	3.98517	5.26936	3.61554	4.9558	3.84617
hSQ000118	64801	6.32387	5.66216	6.51447	5.84547	6.63508
hSQ000119	23567	4.58896	5.5556	4.16932	5.31703	5.04531
hSQ000121	7175	6.04892	5.82636	7.01405	7.3456	6.0424
hSQ000123	7019	6.07736	6.41642	6.13263	5.95812	5.75312
hSQ000124	6674	4.92525	5.57479	4.86759	5.27563	5.36913
hSQ000128	2288	9.09582	9.60115	9.20862	9.69993	10.0971
hSQ000130	7307	8.39925	7.9082	9.35676	9.02238	9.65712
hSQ000131	1198	6.32257	7.43876	5.71788	6.81245	6.09577
hSQ000134	90410	2.95725	3.7606	3.05779	3.78835	3.86403
hSQ000135	10168	3.9867	5.7903	4.22977	4.58238	4.63544
hSQ000138	567	4.3932	4.36636	4.58685	4.38759	4.09092
hSQ000139	389842	8.29631	7.48961	9.0715	8.16241	8.78358
hSQ000140	1839	4.15642	5.3418	4.92401	5.10445	4.51639
hSQ000142	90271	3.56295	3.92858	3.3369	3.77842	3.22504
hSQ000143	22839	5.75989	5.50221	4.55751	7.19002	6.12631
hSQ000148	64343	2.95437	3.08605	2.97346	3.37151	3.32374
hSQ000154	26979	5.17956	6.63128	5.38068	6.9054	4.38876
hSQ000155	1030	3.45873	4.48418	3.54062	4.10259	3.78101
hSQ000156	2145	3.69295	4.17176	3.5203	4.27488	3.03756
hSQ000159	1195	3.91475	6.24995	4.19539	5.48209	4.46582
hSQ000160	284565	4.79033	4.57332	5.09597	4.55358	4.25213
hSQ000163	204	5.65553	5.42059	5.31694	5.57869	4.91827
hSQ000166	23421	5.57069	4.92935	4.65153	5.55302	5.93976
hSQ000170	2647	3.62369	3.99195	3.34263	3.64382	3.7754
hSQ000171	387640::219688	6.44335	7.7325	6.63386	6.03784	6.50075
hSQ000173	221322	3.83897	5.45398	3.75882	5.53178	4.23845
hSQ000177	10961	6.9342	7.38752	5.78156	7.3385	7.20409
hSQ000181	3308	10.4861	10.3724	12.0167	10.9257	10.6493
hSQ000182	4904	9.78253	8.24924	8.75631	9.31949	9.22249
hSQ000185	10198	3.37748	2.91364	3.47202	3.76021	3.157
hSQ000190	2217	4.42909	5.31983	4.31452	5.20886	4.2666
hSQ000193	60672	4.07536	4.75203	4.04293	5.23208	4.90008
hSQ000194	6218	6.93512	6.8358	7.73039	7.24206	7.13913
hSQ000198	143158	3.38209	3.70214	3.25931	3.85623	2.67498
hSQ000202	84109	3.89504	4.46889	3.57761	4.00295	3.94394
hSQ000203	55831	8.56371	8.80797	8.64033	8.74349	9.34028
hSQ000209	10062	3.35551	5.02296	3.70387	4.22852	4.88074
hSQ000211	10443	6.18694	7.00759	5.0324	6.84587	5.96088
hSQ000218	23613	5.61755	7.86172	6.37517	6.74415	6.06554
hSQ000221	10943	3.91062	3.97119	3.76965	3.93806	3.90435
hSQ000223	54468	4.5085	5.33197	6.18922	5.4926	5.65464
hSQ000225	440368	6.4826	6.25987	7.50716	7.66937	6.71133
hSQ000227	64081	4.09266	4.92438	4.6852	5.26101	4.85342
hSQ000228	55153	6.88288	7.43272	6.96487	6.72528	6.19187
hSQ000234	57599	7.92751	7.1477	8.38355	7.70463	7.76122
hSQ000236	2992	7.55918	7.92539	7.67638	7.42543	7.88024
hSQ000240	9529	3.19776	5.33142	5.02294	4.21687	4.19005
hSQ000242	83992	4.82519	5.42867	5.26289	6.03967	4.9719
hSQ000245	9702	4.87356	5.62154	4.97683	5.79396	5.3356
hSQ000250	5925	4.48017	5.97239	5.04706	5.89135	5.98341
hSQ000252	1355	6.90859	7.28484	7.36858	7.00738	6.16282
hSQ000253	114799	4.19159	4.64334	4.50136	4.37319	4.43956
hSQ000257	54996	4.90493	5.69802	5.23999	5.53125	4.90354
hSQ000260	5373	4.85486	5.46093	5.1835	5.63955	5.85389
hSQ000262	22919	8.48894	8.76364	8.93807	7.9939	8.88535
hSQ000263	6938	5.58225	5.68672	5.78451	6.06562	5.01968
hSQ000267	9648	6.04935	6.42673	6.38851	7.27049	5.87276
hSQ000268	22837	4.6692	4.55046	6.05391	5.91017	5.01107
hSQ000269	84061	6.93646	7.26161	8.45799	6.84053	6.15202
hSQ000270	9338	5.50738	4.622	5.4404	5.15651	5.65545
hSQ000272	25852	4.72546	5.81143	4.99292	5.8812	5.49504
hSQ000274	1486	3.46866	3.75807	3.87257	4.08461	3.99613
hSQ000275	4566	2.9919	3.77326	2.45036	3.6554	2.55416
hSQ000275	4566	3.02518	3.72973	2.42044	3.56636	2.57852
hSQ000277	5931	9.07653	10.5043	9.60818	10.1666	8.80409
hSQ000280	10463	3.09137	3.79529	3.08493	3.73635	3.65769
hSQ000282	637	3.41148	4.80721	3.67827	4.31386	3.87669
hSQ000287	989	7.52252	6.43083	7.25764	7.18987	6.9867
hSQ000288	23137	5.63702	5.35624	6.61319	6.89513	6.0063
hSQ000290	7298	6.25706	7.09007	5.57413	6.47446	5.95827
hSQ000292	340485	4.26683	5.54988	5.34477	4.94505	4.75214
hSQ000294	5108	5.70822	8.06527	8.92519	8.21622	6.60116
hSQ000298	65124	3.58161	4.16085	3.5194	4.36443	3.80731
hSQ000299	51123	3.94088	4.46441	4.16193	4.58817	3.60397
hSQ000304	64110	7.36794	7.5579	7.77222	7.38054	8.07063
hSQ000306	79077	4.99754	5.67149	4.65341	6.16389	4.83535
hSQ000308	3712	6.21807	7.13717	5.95446	7.05493	6.27339
hSQ000311	80264	5.78445	6.13184	5.42883	7.44366	5.61794
hSQ000314	5077	5.74996	5.28727	6.44292	6.87957	5.74673
hSQ000320	284695	8.49327	7.03557	9.01093	8.21721	8.18003
hSQ000323	8325	7.60599	7.86148	6.92286	6.94954	7.16059
hSQ000328	10542	2.6118	3.341	2.81803	3.07844	3.08147
hSQ000333	84709	4.24398	5.01375	4.62427	5.01901	5.06947
hSQ000335	224	5.72496	6.18741	7.42105	6.51313	6.22382
hSQ000339	8570	9.66443	8.05377	10.6721	10.6712	7.99229
hSQ000340	83641	2.50739	3.7981	3.31422	3.59889	3.66884
hSQ000341	51652	3.22546	4.56207	3.44256	3.81385	4.03278
hSQ000342	55869	4.91091	5.78091	4.70945	4.85118	4.89601
hSQ000343	4957	5.65733	6.22732	5.8437	5.92091	4.77614
hSQ000345	340544	2.18518	2.82141	2.27992	2.73623	2.34159
hSQ000346	10466	7.77389	8.02196	7.7743	7.79472	7.8268
hSQ000351	1737	7.52794	7.16235	8.25976	8.42332	7.79074
hSQ000354	90550	4.62633	4.67669	5.47972	5.4859	5.05583
hSQ000359	5230	13.1485	10.1119	13.1616	12.5675	13.2756
hSQ000363	3313	8.56985	9.32067	7.55114	9.71303	9.47861
hSQ000367	285961	1.97372	2.78634	2.01066	2.47784	2.20096
hSQ000369	54940	7.02509	5.94897	6.64989	6.58657	6.21741
hSQ000370	22898	4.4227	4.87195	4.17724	5.18376	4.51272
hSQ000372	84232	3.68791	3.88452	3.499	4.46715	4.33317
hSQ000374	115416	3.50164	4.31785	3.96532	4.23816	4.05367
hSQ000376	147912	5.88861	7.0774	5.77929	6.11754	6.07946
hSQ000378	23405	5.67037	6.15555	7.04591	6.47325	6.11866
hSQ000379	27248	3.87745	4.08198	4.03406	4.52342	4.3255
hSQ000381	repname(hSQ000381)	4.70034	4.62362	4.60059	5.07008	4.66992
hSQ000383	5925	3.04107	5.36983	4.05259	4.81588	4.40391
hSQ000386	58487	3.01529	3.74866	3.97553	4.0536	3.76957
hSQ000388	10160	4.55585	5.62854	5.08428	5.09647	4.60646
hSQ000393	567	4.05705	3.77436	4.12782	4.12433	4.21068
hSQ000403	26960	5.44346	6.99142	5.84794	7.18331	6.10832
hSQ000404	11168	7.41313	7.84519	7.17364	8.38407	7.70304
hSQ000405	3921	3.77262	5.14537	3.34613	5.31615	4.28084
hSQ000407	4566::4512	6.88583	6.89947	7.01709	7.64165	5.93292
hSQ000413	29116	3.67045	4.36784	3.88736	5.05664	4.0901
hSQ000414	159	7.60147	7.33589	9.32514	7.75436	8.82496
hSQ000416	7529	8.10913	8.55172	8.59387	8.37805	8.5058
hSQ000418	2200	3.97068	5.10404	4.12438	5.08875	4.70618
hSQ000419	9465	3.92911	5.1677	4.16669	4.6604	4.34222
hSQ000420	132720	2.0938	3.15946	2.89346	3.07326	3.25709
hSQ000423	199731	3.00068	6.58396	4.31534	4.41804	3.69417
hSQ000424	8848	5.25623	5.4208	5.28524	5.47535	5.73696
hSQ000435	54978	4.97864	6.42667	5.52313	6.27678	4.3267
hSQ000438	1434	10.4282	11.8928	11.1233	12.2763	11.1096
hSQ000442	5001	7.66556	8.71715	8.08455	8.03613	8.06034
hSQ000458	2876	4.43527	4.14528	5.61842	5.5269	3.36405
hSQ000465	124801	3.9023	4.52515	4.43478	4.82891	4.4965
hSQ000467	55798	6.50354	6.78035	6.02408	6.29758	5.39505
hSQ000470	90736	2.64079	3.20055	2.60295	2.88967	2.50756
hSQ000471	7727	6.34191	7.10022	6.82234	6.40629	6.20794
hSQ000472	9730	5.88457	7.75627	6.60178	7.2807	5.88054
hSQ000473	10487	7.91106	5.71976	9.36345	9.30902	7.75668
hSQ000478	8125	6.14012	8.99429	7.68098	9.40716	6.27315
hSQ000484	54780	5.88689	5.92871	7.30082	6.76548	6.96977
hSQ000485	repname(hSQ000485)	9.48394	10.7138	9.03043	9.77725	9.85198
hSQ000488	79810	5.39228	6.45382	4.65469	5.70331	5.31643
hSQ000494	54949	4.73571	4.35676	4.8572	5.3531	4.01589
hSQ000496	3093	4.45826	5.49641	5.28728	5.42257	5.52877
hSQ000499	4850	5.74257	5.17926	6.26623	6.71686	5.209
hSQ000508	388638	2.96083	3.92788	2.92544	3.86865	4.0411
hSQ000510	54758	6.24599	8.06656	6.30351	6.95101	6.21895
hSQ000512	390217	2.9551	4.04618	3.25173	4.03539	3.25303
hSQ000514	401848	4.74051	5.4257	4.69901	5.72505	5.06634
hSQ000524	5359	5.8487	5.70776	6.11717	6.2594	5.84733
hSQ000525	9786	7.75296	8.40386	7.33952	7.9817	6.767
hSQ000526	149175	3.8207	4.67602	4.13483	4.40817	3.97531
hSQ000532	51754	3.22666	3.7359	3.67022	4.11579	3.22825
hSQ000533	9984	6.83982	7.90547	7.15893	6.97205	6.6541
hSQ000537	7073	3.07913	3.60242	3.03287	3.58596	2.6382
hSQ000538	1824	7.92421	7.96219	7.93717	7.93626	7.26615
hSQ000539	9252	5.29834	5.90415	5.92397	7.9806	7.31106
hSQ000543	284345	5.18779	6.97867	4.9606	5.42017	5.40794
hSQ000548	401509::401511	4.56071	5.04778	4.803	5.15037	4.31481
hSQ000551	2800	4.05498	5.03112	4.09727	5.6314	5.51293
hSQ000552	1407	6.54276	6.44622	7.1246	6.87128	6.51406
hSQ000558	7553	4.24478	5.00247	4.08616	4.99794	4.14509
hSQ000559	1825	7.40508	6.81556	8.53113	8.6191	6.82627
hSQ000566	4566::4565	2.84997	4.21136	3.06972	3.97978	2.9996
hSQ000568	91624	4.88303	6.21668	5.16766	6.11141	5.24839
hSQ000569	219749	2.0591	2.71404	2.42959	2.9516	2.5941
hSQ000570	54882	3.95373	6.51861	4.95377	5.65936	5.05304
hSQ000579	4799	4.7984	5.85869	4.8228	5.34081	4.96131
hSQ000580	10447	3.21062	3.45396	4.62621	4.70476	4.61041
hSQ000582	9972	7.45772	7.55925	8.40686	7.96182	6.88825
hSQ000586	8504::153914	7.28211	7.58078	6.99973	7.11309	6.65591
hSQ000588	56475	3.64709	4.00327	3.26636	3.64617	3.93412
hSQ000589	30827	4.94092	6.03289	4.0947	5.39199	5.82738
hSQ000590	8310	6.03201	7.59882	6.43355	6.40546	6.11984
hSQ000592	121260	5.57593	4.82607	5.89432	4.9904	4.43462
hSQ000594	55632	4.49857	6.04947	5.41998	6.27111	5.6061
hSQ000596	11124	6.48878	7.83234	6.1743	7.35651	7.35947
hSQ000598	5527	5.54816	5.61174	5.42524	5.67297	5.454
hSQ000603	3111	4.73903	5.81875	4.28863	5.00241	4.96297
hSQ000608	7965	8.18214	8.9705	8.52482	8.62252	9.13432
hSQ000613	57721	6.57168	7.72298	7.50106	6.46288	6.68462
hSQ000614	7644	3.76455	4.41613	4.75948	5.08169	4.33777
hSQ000616	255812	4.11386	5.38597	4.418	4.92955	4.67897
hSQ000617	10147	4.08141	4.62488	3.89092	4.91032	4.24942
hSQ000619	2353	4.51923	5.90461	5.14142	5.36572	4.81817
hSQ000620	124801	3.63664	4.09781	3.6698	4.34586	4.08153
hSQ000621	79991	3.3401	4.79712	3.04733	4.02184	4.18524
hSQ000622	4077	7.53467	7.32868	8.51094	7.94557	7.35928
hSQ000624	84817	4.2366	4.0057	4.75822	4.89446	4.70352
hSQ000625	57396	3.8669	6.13415	4.00097	5.20721	4.34634
hSQ000627	6181	6.61924	5.42217	7.55736	7.27534	4.84988
hSQ000631	389101	7.14117	6.57032	6.8498	6.68318	4.64333
hSQ000632	51635	5.69517	6.0579	5.9906	6.26407	6.17119
hSQ000634	1660	10.3706	9.74865	11.0906	12.0066	11.5654
hSQ000637	1063	7.35751	7.00674	6.9466	7.4659	6.27215
hSQ000639	6161	2.84045	4.20159	2.96789	3.59659	2.75382
hSQ000640	132241	2.56387	3.79322	3.00881	3.29955	2.66013
hSQ000641	133926	1.97239	3.50925	2.89881	3.15899	2.96671
hSQ000642	7404	4.88397	4.6397	4.88018	5.2781	4.65375
hSQ000643	7321	3.29366	2.73313	4.88799	3.88411	3.37773
hSQ000645	9922	4.39538	5.32224	4.60809	5.18757	4.75341
hSQ000647	84541	5.37891	6.41287	5.58362	5.96586	5.52628
hSQ000648	8727	5.49497	6.13321	5.45585	6.17968	6.31524
hSQ000649	6185	7.55267	7.59949	6.45101	8.47739	7.86013
hSQ000651	5663	6.55285	7.62139	6.21464	6.58604	6.46659
hSQ000656	115098	4.92902	5.44872	4.56089	5.52103	4.47438
hSQ000661	83464	3.44078	5.24901	4.33158	3.84757	4.3135
hSQ000663	157567	6.95477	8.04568	6.72849	6.61458	6.671
hSQ000666	162979	6.04943	7.45882	5.8305	6.81203	5.93778
hSQ000669	56005	5.57012	5.29575	5.72007	6.64114	4.5705
hSQ000670	repname(hSQ000670)	5.42019	5.19379	5.09614	5.50664	4.95042
hSQ000671	57150	2.64856	3.8638	3.00636	3.06682	3.2703
hSQ000672	339287	4.09269	4.11324	3.66711	4.17166	4.27287
hSQ000676	5152	5.03119	5.32406	5.28693	5.68193	5.47613
hSQ000680	51312	2.85649	4.06121	3.47911	3.94148	2.93828
hSQ000682	6201	10.3965	9.10537	9.86907	10.3704	10.4251
hSQ000683	3953	3.43985	5.00402	3.96774	4.02715	3.9117
hSQ000687	202459	2.72101	2.13616	3.74062	3.43195	2.65482
hSQ000696	6608	4.14394	5.13908	4.32524	4.47285	4.61044
hSQ000697	91966	4.20946	4.44621	4.13807	4.45321	4.19479
hSQ000698	9124	6.85784	7.87022	6.72456	7.01507	7.44445
hSQ000702	5937	6.13366	7.60791	6.60434	6.32759	5.19163
hSQ000703	9459	5.74008	6.84011	6.29966	6.44422	6.724
hSQ000704	55156	4.36443	5.84272	5.44949	4.63889	4.64739
hSQ000705	529	7.75894	7.45658	6.61347	7.24548	7.87048
hSQ000706	286077	5.77396	7.6725	6.92244	4.73499	4.0408
hSQ000711	2946	4.81895	6.01731	5.00611	5.13906	4.94114
hSQ000712	1778	5.5382	7.18575	5.19304	6.49526	6.37841
hSQ000715	23095	7.48409	9.42457	9.00305	8.47336	7.43141
hSQ000728	83637	3.11693	4.32754	3.68879	4.13523	3.85786
hSQ000730	79009	5.87444	6.71221	5.41826	6.69271	5.66824
hSQ000732	55150	2.97798	3.91106	3.43854	4.13739	3.46846
hSQ000733	29104	4.4147	4.79186	4.10754	4.61119	4.50493
hSQ000734	7982	4.57723	5.46736	4.67637	5.09562	4.92136
hSQ000736	55333	4.26232	4.02269	3.87542	4.80099	3.62988
hSQ000737	57446	6.85466	7.57534	7.31788	7.1168	6.99093
hSQ000739	389223	10.0096	10.8019	9.16935	11.7065	6.68365
hSQ000740	11118	4.9432	5.11152	4.66171	5.21386	5.0116
hSQ000750	3340	4.39636	5.29702	5.17384	5.01984	4.15568
hSQ000758	192669	3.21372	3.70328	3.39296	4.27002	4.14413
hSQ000761	8894	5.86247	7.29269	6.0491	6.3218	6.08138
hSQ000764	55761	5.43417	6.23518	4.84929	6.51258	5.35299
hSQ000765	338611	3.8604	4.22634	3.97399	4.61704	3.61725
hSQ000766	4704	7.98982	6.95751	7.53505	7.15464	7.93839
hSQ000767	64216	6.87927	7.28685	6.68624	6.81541	6.46727
hSQ000768	7188	3.66334	4.49959	3.72723	4.64188	4.06105
hSQ000769	9519	3.34025	3.77024	3.20212	3.95278	3.96241
hSQ000772	84967	3.72043	2.98521	3.4908	3.73456	3.47815
hSQ000774	54885	5.16276	5.3173	4.82028	6.49922	5.27828
hSQ000776	3308	10.3906	11.3696	10.3902	11.0492	11.229
hSQ000780	8760	4.4382	5.47346	5.10404	5.16491	4.69262
hSQ000782	26060	5.50529	7.05312	5.77776	6.06207	5.96348
hSQ000786	317	6.1013	6.2189	7.84326	6.96254	5.89039
hSQ000788	26012	2.81615	3.9326	2.8675	3.85224	3.24974
hSQ000790	1371	7.55867	7.18959	8.56082	7.62342	7.09107
hSQ000791	201255	3.12235	5.01013	3.67513	4.6085	4.38986
hSQ000794	3382	4.1122	5.18134	4.59291	5.04686	4.44856
hSQ000796	170261	11.2431	10.022	13.4619	13.0756	13.7101
hSQ000797	79858	4.87187	5.49033	5.52637	5.12266	5.36557
hSQ000801	10969	7.90877	7.38332	7.03264	7.0518	8.13504
hSQ000806	9377	6.605	5.97771	6.81976	6.84508	7.36284
hSQ000807	9353	7.59972	7.46876	7.37183	8.76185	6.54663
hSQ000808	26172::729085	4.21021	5.21616	4.79723	3.99898	4.55346
hSQ000809	29923::55798	4.45755	4.96711	4.70097	5.6102	4.36934
hSQ000811	84060::84849	2.96828	4.30084	4.0661	3.86901	3.75153
hSQ000812	54899	5.91509	6.34276	8.80103	6.93639	6.55285
hSQ000814	9833	5.59006	5.72466	5.26482	5.72358	6.04443
hSQ000815	400741	10.4098	10.7181	10.9622	9.17008	8.2182
hSQ000816	1488	4.78774	5.43239	4.0773	6.02482	5.43005
hSQ000817	5587	6.5945	8.23145	7.2861	6.31233	6.28033
hSQ000823	9678	6.40078	5.68138	8.07641	7.62507	5.75874
hSQ000824	253738	6.11478	6.77174	6.07516	6.44599	6.17728
hSQ000826	2739	8.59254	6.38291	8.92143	7.51082	6.50857
hSQ000827	2969	6.78324	7.32534	6.46216	7.41263	5.76831
hSQ000831	92667	6.92841	7.07918	7.56384	7.31336	7.64527
hSQ000834	196074	7.40219	8.3823	8.61351	7.82969	8.22067
hSQ000835	10146	8.95745	9.9239	8.03364	9.48069	8.0448
hSQ000836	8539	8.09444	7.4681	9.997	8.55381	8.04338
hSQ000838	1312	4.79808	6.07599	4.36897	6.2014	5.426
hSQ000841	284252	4.85657	5.46371	4.61239	4.93046	4.97331
hSQ000842	repname(hSQ000842)	1.93683	2.8653	1.90377	2.49319	2.09467
hSQ000842	repname(hSQ000842)	2.09006	2.88055	1.95519	2.54603	2.08953
hSQ000842	repname(hSQ000842)	2.17815	2.93112	1.9155	2.58732	2.20991
hSQ000842	repname(hSQ000842)	2.13605	2.74585	1.96411	2.58677	1.74352
hSQ000842	repname(hSQ000842)	2.22579	2.8207	1.98808	2.66406	2.12081
hSQ000843	6674	4.88823	5.57799	4.31333	5.39587	5.21644
hSQ000848	1604	6.81267	7.22995	7.42854	7.31271	6.41837
hSQ000849	51375	3.93691	4.31133	4.54359	4.25987	4.67049
hSQ000850	25897	4.88836	4.85812	5.36356	5.4602	5.1449
hSQ000851	1353	4.5287	3.87465	4.69916	4.71569	4.92574
hSQ000852	55437	2.79858	3.18679	2.98397	3.37285	3.23059
hSQ000853	10809	3.33004	3.72118	3.05944	4.26311	3.96565
hSQ000858	7862	5.84779	6.43064	6.14262	6.72005	5.8878
hSQ000860	10137	8.79884	9.35129	10.8619	10.342	8.83154
hSQ000864	27434	4.32684	5.55471	4.45203	5.08051	4.4918
hSQ000866	80205	4.80543	5.96914	4.69364	6.51911	5.3517
hSQ000878	220594	4.45705	4.44255	4.8948	5.40131	5.16831
hSQ000879	57108	4.6942	4.82376	5.33896	5.40046	4.29676
hSQ000886	340211	2.97042	4.21542	4.29837	4.55487	3.41808
hSQ000889	501	6.55061	6.91377	7.10997	8.05004	7.28742
hSQ000891	2597	12.0271	10.9711	10.6212	12.4176	12.1062
hSQ000892	10018	3.30449	3.65907	3.47678	3.58058	3.34395
hSQ000893	643564::399768	3.33232	3.3674	3.22027	3.6673	2.5523
hSQ000894	4218	4.69084	5.15522	4.19651	5.15457	4.35873
hSQ000901	84271	6.6838	7.0285	6.65743	6.57609	6.39682
hSQ000909	7565::147694	3.42346	4.57881	3.36837	3.86878	3.33465
hSQ000910	128322	3.52551	5.05026	3.84861	4.27667	3.99206
hSQ000917	5717	11.0542	10.0049	12.4693	11.8241	11.9054
hSQ000921	5048	7.38264	7.69045	7.04026	7.78542	7.13224
hSQ000923	226	7.5274	7.07053	6.77553	8.32417	7.64635
hSQ000926	4752	6.1252	7.08615	6.04426	6.40366	6.32575
hSQ000928	148398	5.29172	6.08906	5.01221	5.30766	5.71601
hSQ000929	55339	6.85428	8.23504	6.99536	7.60409	6.45555
hSQ000931	162427	5.05382	6.05634	5.0748	5.75071	4.73978
hSQ000937	79612	4.53951	5.45658	5.27375	5.81005	5.10067
hSQ000941	27429	5.51214	6.17154	4.8594	6.08494	5.15792
hSQ000944	3636	5.217	6.1728	4.87874	5.75183	5.3203
hSQ000945	402112	6.65025	6.19973	6.78782	7.29584	5.84032
hSQ000949	7474	5.01127	4.8766	6.24527	5.81496	5.09162
hSQ000950	7351	2.88221	3.90774	3.33243	3.50625	3.23129
hSQ000951	repname(hSQ000951)	3.85314	3.46209	5.0375	4.4945	4.10686
hSQ000952	441885	6.83202	7.23429	6.6069	7.1282	6.89691
hSQ000955	9604	5.28765	5.26695	4.68577	5.42058	5.35749
hSQ000956	55832	8.62366	9.09051	8.96805	9.79105	9.32293
hSQ000958	57820	2.88	2.92505	2.3748	2.87809	2.7826
hSQ000959	23161	2.96549	3.19568	3.23694	3.52379	3.48896
hSQ000960	5570	2.30097	2.80767	2.53641	2.86404	3.01323
hSQ000962	80054	4.52654	5.93575	4.77482	5.01372	4.83978
hSQ000963	4081	5.65459	5.58206	5.88508	5.97986	5.6397
hSQ000968	79840	6.1155	6.955	6.78586	6.87699	6.21862
hSQ000969	5430	7.26351	8.5844	7.36474	7.92196	6.74654
hSQ000972	1385	4.3819	5.15227	5.38527	5.78714	5.06761
hSQ000973	51062	6.31561	8.06381	7.42693	7.11678	6.64238
hSQ000974	115265	4.41104	4.96609	5.21697	5.00028	4.91133
hSQ000975	158563	5.58976	6.75462	6.38317	7.14368	5.77277
hSQ000976	401957	5.3559	5.57284	6.00775	7.39211	6.12872
hSQ000980	10186	3.83916	4.80311	4.58253	4.91147	4.50333
hSQ000981	1456	3.6439	4.92763	3.5412	4.01231	4.32886
hSQ000988	51019	3.36958	4.02684	3.21468	3.82499	3.93077
hSQ000990	80054	3.9132	5.21349	4.60688	4.29801	4.6324
hSQ000992	1962	6.07813	6.38895	6.55971	6.07723	5.52288
hSQ000993	26610	5.89431	6.41969	5.41643	6.02988	5.82604
hSQ000996	8518	6.58556	6.41349	6.97102	7.27195	6.52465
hSQ001000	84548	4.98247	5.5376	5.00395	4.65929	4.26414
hSQ001002	56947	3.87026	4.16227	4.10971	4.16657	4.14035
hSQ001003	2264	4.48367	6.07258	4.71481	5.20233	4.56213
hSQ001004	79075	5.26509	5.45334	5.86564	5.50983	5.09774
hSQ001006	3840	6.51788	6.43167	7.26718	6.88391	6.04981
hSQ001011	130029	2.74647	4.99821	5.72643	5.33735	4.8528
hSQ001014	9100	7.41672	6.59869	8.49486	7.42927	7.61464
hSQ001015	8507	5.4667	6.80936	5.90788	7.44139	6.47215
hSQ001018	9616	1.98292	2.67007	2.25392	2.51779	2.56785
hSQ001019	284611	3.33303	4.1225	4.08746	3.89876	4.02781
hSQ001021	7531	8.49632	9.37254	8.52058	8.8045	9.31427
hSQ001022	310	6.96136	7.64687	6.40975	7.46174	7.31861
hSQ001022	310	6.7391	6.78095	6.63071	7.28505	7.52178
hSQ001026	5427	6.45357	7.15481	6.24589	6.38262	6.59606
hSQ001028	389674	7.8149	6.32509	10.3861	8.57416	7.46702
hSQ001032	553115::23578	5.94164	6.02358	4.76854	6.15334	5.51326
hSQ001033	439982	3.83317	3.67669	4.01218	4.06319	3.83117
hSQ001034	8655	5.31558	4.28273	5.91324	5.30148	4.94806
hSQ001036	1104::8420	1.71035	2.95876	1.67554	2.41958	1.80367
hSQ001037	402120	4.24467	4.06074	4.43376	4.60994	3.48821
hSQ001039	83640	6.65374	5.69823	6.38377	5.20331	6.57711
hSQ001041	51501	3.77378	4.28997	3.73924	4.33078	4.16696
hSQ001042	6165	7.70105	7.27578	8.87246	8.1836	8.09227
hSQ001044	2192	6.52571	8.17604	7.23046	7.00717	6.86441
hSQ001048	57706	4.0269	5.90076	5.4183	5.05469	4.95333
hSQ001051	25847	3.98357	4.04662	4.37688	4.02036	3.97798
hSQ001053	54800	6.64695	7.13787	7.81152	5.65244	4.72768
hSQ001054	3251	5.46452	5.74144	6.49999	5.3369	6.03319
hSQ001055	57089	2.61014	3.48165	3.73473	2.85122	3.24894
hSQ001058	repname(hSQ001058)	12.4905	14.0086	11.3734	14.1868	13.4249
hSQ001058	repname(hSQ001058)	12.4638	13.6281	12.1709	15.4417	11.3417
hSQ001058	repname(hSQ001058)	12.6901	13.4917	12.1052	15.5251	11.2577
hSQ001058	repname(hSQ001058)	12.7799	14.6309	12.0301	15.9144	13.5191
hSQ001058	repname(hSQ001058)	12.1012	14.4101	11.6803	15.4499	13.5082
hSQ001059	22836	5.49582	6.27237	5.69286	6.64247	5.58875
hSQ001060	1643	5.8126	7.30997	5.95608	6.11439	6.41783
hSQ001061	25926	9.05396	7.88745	9.99191	9.60003	9.58308
hSQ001064	81831	2.82842	3.23629	3.2395	3.58253	3.7677
hSQ001065	84186	5.37082	5.64621	5.29837	5.11672	4.95576
hSQ001068	54462	3.91448	4.31468	4.37911	4.69777	4.37092
hSQ001069	23169	3.14688	3.65186	3.83899	3.77392	2.99174
hSQ001070	4957	4.72661	6.03987	5.01191	5.57453	4.60928
hSQ001077	154467	3.90394	4.0802	4.08221	4.63993	4.38373
hSQ001084	3398	4.93837	5.30488	5.83296	5.7037	4.73182
hSQ001096	85406	4.03662	4.43434	4.25985	4.22743	3.75704
hSQ001102	8237	7.79305	9.05699	7.28681	8.70063	7.76785
hSQ001104	51302	2.80748	4.34322	3.06715	3.36404	3.23267
hSQ001105	5546	6.43328	6.19572	6.76695	5.57832	6.18028
hSQ001106	11321	5.47257	5.24761	5.18571	5.55498	5.82007
hSQ001111	3313	9.18766	9.35136	9.53557	9.76245	8.3546
hSQ001112	3685	7.01555	6.44683	7.27545	8.38396	7.33134
hSQ001115	440576	4.06523	4.3986	3.8605	4.79262	4.21314
hSQ001119	256112	2.77229	3.55067	2.58491	3.26891	2.74948
hSQ001120	84976	5.45191	6.01666	5.94902	5.39191	4.7476
hSQ001122	3909	4.62918	7.00021	5.44085	5.68596	6.05775
hSQ001124	23255	4.35869	5.02632	4.15341	4.62384	4.21545
hSQ001126	51463	5.00933	5.82448	5.06386	5.67294	4.82785
hSQ001137	399664	3.91291	4.33322	3.74582	4.2357	3.98039
hSQ001140	403	4.14838	4.88784	4.52635	4.897	5.36036
hSQ001147	23020	5.37823	8.19396	6.45364	6.80341	6.35302
hSQ001148	5333	3.87637	5.91515	4.13644	5.49135	4.96619
hSQ001151	10014	4.2018	4.62749	3.90302	4.35546	3.92434
hSQ001153	164	7.77249	8.95147	8.54337	8.71599	7.21086
hSQ001155	6207	8.63787	8.17307	9.74197	8.86891	6.2413
hSQ001158	10010	4.2842	4.64711	3.97668	4.30589	4.19346
hSQ001159	341511	4.05613	4.66007	3.86546	4.37798	3.57694
hSQ001166	10585	4.60798	5.993	5.16821	5.78752	4.89723
hSQ001168	64118	3.7782	4.03455	3.75112	4.47301	3.23251
hSQ001170	6484	2.70389	4.35536	3.22553	3.73563	3.64699
hSQ001172	6510	7.91391	8.53396	8.06346	9.17093	6.96412
hSQ001173	440673	2.57919	4.36495	3.37274	4.64329	3.47725
hSQ001175	8890	6.99182	7.64012	5.65635	8.12557	7.56637
hSQ001176	375056	5.97853	6.24251	5.70625	6.89252	5.89277
hSQ001179	7855::81561	4.76839	5.33953	5.582	5.45436	4.61359
hSQ001180	10765	6.90674	8.19728	7.88973	8.14341	6.99041
hSQ001186	11270	5.63376	6.63654	5.55879	6.35524	5.04385
hSQ001189	858	1.92684	2.75072	2.43748	2.87142	2.79946
hSQ001192	55746	9.07153	8.4903	8.97992	9.03761	8.45727
hSQ001193	92140	7.67066	6.54881	8.45259	7.67895	7.03713
hSQ001196	83451	4.24814	6.40662	3.97146	5.7643	5.69847
hSQ001198	84292	5.45159	6.04028	5.18839	6.13224	5.93108
hSQ001200	10489	7.95671	8.88512	7.17403	8.3205	7.61338
hSQ001202	4802	6.72073	7.94271	6.19593	7.06625	6.90881
hSQ001203	5834	7.52401	8.31078	7.25566	8.31333	7.10046
hSQ001206	613037::388231	3.59484	4.79096	4.06659	5.15364	4.01823
hSQ001207	10695	4.14116	4.91009	3.94572	4.90379	4.59421
hSQ001208	221895	3.53343	3.98902	3.7472	3.84148	3.88487
hSQ001210	351	10.6624	10.0219	13.4011	8.25882	7.06938
hSQ001212	5977	6.52347	6.86587	6.43553	6.54272	6.2059
hSQ001215	25874	4.55829	4.87668	5.76567	5.3146	4.92186
hSQ001217	3836	6.941	8.2473	7.34809	7.30141	7.39926
hSQ001220	3688	7.21998	7.1125	8.34608	5.39169	4.80772
hSQ001222	7184	12.1987	11.4723	12.7383	12.0911	9.93497
hSQ001223	79637	5.7113	6.55772	5.72228	6.18202	6.10162
hSQ001224	64769	3.1819	3.00295	3.46546	3.60293	3.16351
hSQ001225	134957	5.35989	6.49535	6.00501	6.25449	5.81975
hSQ001227	197322	3.3993	5.72214	4.76467	4.4512	4.35658
hSQ001229	22894	6.93398	7.61363	7.08062	7.34216	6.65473
hSQ001230	267004	5.98852	6.16468	6.38889	6.34145	6.3254
hSQ001231	51075	6.22169	6.21658	5.60149	6.79263	6.46343
hSQ001234	10286	6.40147	6.3103	5.95759	5.99101	5.92172
hSQ001236	483	9.05624	7.75705	11.6297	10.056	10.0693
hSQ001240	441925	5.39283	5.32659	4.91382	5.3355	5.56903
hSQ001241	6203	9.3477	8.60191	7.80844	9.58089	10.0899
hSQ001242	2192	5.0504	7.36175	6.51534	6.31664	6.02379
hSQ001243	51586	5.68146	6.34276	5.89989	6.50519	5.19064
hSQ001245	79086	4.36004	4.38935	4.00731	4.29867	4.31407
hSQ001246	3916	8.47269	8.54033	7.79449	8.04561	7.10538
hSQ001248	81618	4.30015	5.80724	3.92957	6.0752	5.60414
hSQ001250	150962	6.20485	7.55801	6.42348	7.06659	5.76402
hSQ001251	55013	2.63931	2.70737	2.76459	3.12397	3.04658
hSQ001252	113201	3.18565	3.57267	3.04807	3.80611	3.49018
hSQ001254	191	9.80054	10.3297	8.95429	10.7149	10.6464
hSQ001256	54888	9.14294	9.68927	10.0844	8.61401	8.82861
hSQ001257	54469	5.66665	5.46223	6.10274	6.01399	6.99066
hSQ001262	441408	2.86204	3.8483	3.35277	3.64673	3.36983
hSQ001262	441408	3.10308	3.81616	3.41155	3.72727	3.49694
hSQ001265	84928	6.5064	5.55794	8.15868	8.3133	6.37277
hSQ001268	repname(hSQ001268)	6.57064	7.34066	6.24663	7.78639	5.63772
hSQ001268	repname(hSQ001268)	6.67583	7.3801	6.41082	8.08684	5.59877
hSQ001268	repname(hSQ001268)	6.91006	7.01258	6.6367	8.24109	6.79008
hSQ001268	repname(hSQ001268)	7.0099	7.39075	6.59806	8.32555	5.66169
hSQ001268	repname(hSQ001268)	6.75875	6.03054	6.414	7.6536	5.62595
hSQ001269	54407	7.70749	7.52675	8.72549	8.44563	6.7786
hSQ001272	144577	3.2755	3.91744	4.27032	3.77869	3.62174
hSQ001274	6636	5.48143	5.00324	5.51817	5.21087	4.21738
hSQ001275	23438	7.18939	7.49936	7.39747	7.85494	6.59751
hSQ001276	29127	6.59003	8.41019	7.03839	7.48404	6.92854
hSQ001278	27020	5.45153	6.27786	5.43182	6.07483	5.22498
hSQ001280	28958	5.09581	5.05656	5.52328	5.47994	4.10379
hSQ001284	29968	12.3071	10.4133	14.4454	12.0608	14.1272
hSQ001289	4738	3.16369	3.98836	3.10209	3.45002	3.24049
hSQ001291	57678	6.27274	7.87454	7.0619	7.29112	6.6726
hSQ001293	7321	3.71859	4.00705	4.35179	4.46957	4.81829
hSQ001298	4211	5.61837	5.9675	5.70351	5.76879	5.65796
hSQ001301	80003	3.02405	3.76583	2.96455	3.84841	3.20524
hSQ001307	84525	1.60955	2.43933	2.07786	2.3664	2.07472
hSQ001309	10994	5.17455	6.51733	4.2284	6.78197	6.22438
hSQ001310	4728	4.73605	4.60381	4.75329	5.45681	4.28738
hSQ001312	3954	6.59529	8.06229	6.68962	6.91806	6.66409
hSQ001314	5366	3.6499	3.58703	3.6388	3.66631	3.35654
hSQ001317	7181	4.43935	5.56733	4.59411	5.24071	4.92782
hSQ001318	27325	6.00831	7.52486	6.63436	7.17634	6.48938
hSQ001324	10849	5.82556	6.97312	4.91451	6.10909	5.86047
hSQ001326	6731	5.84587	6.09214	6.15145	6.54786	6.08272
hSQ001329	55892	4.12969	4.97026	3.6566	4.75972	4.47149
hSQ001331	120	5.31315	6.19589	5.47637	6.88351	5.30149
hSQ001333	9871	8.33077	8.42827	8.99589	9.3354	7.9653
hSQ001343	1760	3.95652	5.15673	3.79214	4.92025	3.96299
hSQ001348	9533	6.62313	7.11321	6.6672	7.09572	6.50025
hSQ001354	163033	6.789	7.99824	6.59773	6.36959	6.23742
hSQ001355	90204	6.30242	6.59713	6.0458	6.32513	5.82704
hSQ001356	7386	6.27484	6.12039	6.70996	6.72867	6.39709
hSQ001357	113691	2.67446	3.92865	2.7524	3.33108	2.773
hSQ001358	10362	3.65594	4.83251	3.83625	4.69419	4.57615
hSQ001361	1459	5.87989	7.50723	5.8086	8.13284	6.55509
hSQ001367	343153	5.923	4.14238	6.21061	5.28016	3.63518
hSQ001373	81	9.83419	9.58143	9.54355	11.0364	8.69709
hSQ001376	79102	4.95797	5.49968	5.44168	5.69378	4.10853
hSQ001378	4861	1.85395	3.53753	2.3389	3.45388	3.06185
hSQ001383	8496	6.31405	5.49921	6.94007	6.92996	6.24547
hSQ001385	25898	3.81436	4.05955	3.91672	3.98315	4.29091
hSQ001386	11332	8.64375	8.64991	8.67379	9.35458	10.0185
hSQ001389	1459	7.36899	8.18643	7.17987	8.24854	6.43468
hSQ001397	26152	4.02492	4.91882	4.90833	5.05054	4.87697
hSQ001398	51735	5.88052	6.29213	6.87062	6.78127	5.3634
hSQ001399	9054	5.73123	6.79313	5.71149	6.43721	6.28955
hSQ001410	79169	4.97905	6.05074	3.76751	5.95542	5.02129
hSQ001411	80305	3.68479	5.24109	3.77661	5.07355	4.28508
hSQ001412	57418	6.88598	7.39416	5.55745	7.48015	6.9714
hSQ001414	6429	9.25173	9.45941	10.0317	9.88189	8.11235
hSQ001415	3021	4.75265	5.49421	5.35593	5.09215	4.77786
hSQ001416	57110	2.77032	3.50794	2.71886	3.3284	3.2072
hSQ001420	79629	3.34453	4.4881	3.43718	4.27552	3.86749
hSQ001423	55335	2.92966	4.10945	3.30411	3.00613	3.45168
hSQ001424	22905	4.63157	6.24053	5.18602	6.00326	5.77458
hSQ001428	91833	3.54673	3.41271	2.89825	3.45717	3.33762
hSQ001429	114984	3.68335	5.31896	3.91721	4.63174	5.06727
hSQ001433	163	5.677	6.32693	6.72849	6.83368	6.44313
hSQ001435	26094	5.90371	5.9223	5.58189	5.80759	5.76914
hSQ001437	283970	2.7494	3.86023	2.8765	3.47764	3.06562
hSQ001440	85236	5.81813	5.29308	5.59446	5.7791	5.66089
hSQ001446	55658	4.13335	5.16605	3.95705	4.92663	4.39207
hSQ001448	467	4.80926	6.71121	4.14191	5.78777	5.37534
hSQ001451	8834	2.80924	3.64735	2.68753	3.62278	3.09469
hSQ001454	64149	4.82938	5.64889	4.45304	5.48327	4.93396
hSQ001461	64779	4.92658	5.74641	4.46082	4.31633	4.51546
hSQ001462	3308	13.0865	12.5327	14.2965	12.2271	10.6299
hSQ001466	8574	5.17469	6.07915	4.73123	6.18843	5.56957
hSQ001467	374882	4.96834	5.11124	4.87911	5.80498	4.77655
hSQ001468	54386	8.83634	7.56201	10.0509	8.9109	8.03173
hSQ001469	440392	3.21267	3.89263	2.55468	3.44241	3.15832
hSQ001472	1329	4.62423	4.12205	4.39977	4.84433	4.43824
hSQ001473	55872	7.55188	7.04509	8.47468	8.21601	8.45233
hSQ001482	64754	6.65471	8.44274	6.60334	7.28814	6.70932
hSQ001485	11200	6.93474	7.07185	6.13324	7.07172	7.13469
hSQ001485	11200	7.16201	7.38056	5.97482	7.08149	6.86865
hSQ001487	51552	6.11999	7.48753	9.21735	6.02974	6.23362
hSQ001488	284349	4.20162	5.03504	4.33984	4.47809	4.37967
hSQ001491	6167	6.02519	5.29579	6.22969	6.04752	5.48683
hSQ001493	5881	4.03694	5.97029	3.94161	5.16074	3.22028
hSQ001494	196483	4.48586	5.87409	4.66032	5.59149	5.29644
hSQ001508	3163	6.52148	6.72231	6.22743	6.72457	6.92869
hSQ001511	57570	4.66787	6.34276	5.75992	6.30796	5.96023
hSQ001514	6605	7.53894	6.79775	8.25528	7.3379	8.30912
hSQ001515	64216	7.26465	7.56736	6.72348	6.94472	7.20911
hSQ001517	79810	3.52647	4.80714	3.90257	4.89646	4.04262
hSQ001519	55706	3.88248	3.78764	4.04091	4.47299	4.06894
hSQ001520	161742	3.65476	4.29991	4.51274	4.23971	4.02672
hSQ001521	9987	13.4935	11.1911	13.3746	13.0424	9.4346
hSQ001526	7222	4.18315	5.07695	4.67609	4.92098	4.91853
hSQ001527	1660	6.87662	8.52774	6.62029	8.92543	7.03345
hSQ001528	402340	6.54854	7.37482	6.02629	8.02732	5.89175
hSQ001529	6575	4.6799	5.56231	5.9147	5.53954	5.68402
hSQ001533	91942	3.80529	4.12606	3.89291	4.50666	4.45874
hSQ001535	10397	8.89324	8.86911	9.36486	9.31018	9.65133
hSQ001537	157506	5.60743	6.02171	6.60327	5.20481	5.4088
hSQ001540	158511	3.77847	4.72315	4.24051	4.63889	4.72292
hSQ001541	repname(hSQ001541)	5.41399	6.22705	5.55795	7.20317	4.97482
hSQ001542	repname(hSQ001542)	5.51928	5.9315	5.70057	7.38966	5.58207
hSQ001544	repname(hSQ001544)	5.48566	6.19398	5.63144	6.88397	5.55048
hSQ001545	repname(hSQ001545)	5.73743	6.53134	5.36422	7.34521	5.73657
hSQ001546	repname(hSQ001546)	5.78608	6.84712	5.538	7.54796	5.87841
hSQ001547	repname(hSQ001547)	5.59128	6.03176	5.3962	7.17352	5.59138
hSQ001548	repname(hSQ001548)	5.76353	5.6836	5.82894	7.28363	6.1997
hSQ001548	repname(hSQ001548)	6.0058	6.28579	5.71977	7.65587	6.08655
hSQ001548	repname(hSQ001548)	5.73832	7.05951	6.01495	7.76717	6.46876
hSQ001549	repname(hSQ001549)	5.5263	6.70131	5.5796	7.29074	5.62659
hSQ001550	repname(hSQ001550)	5.48359	6.10085	5.49681	6.85172	5.50295
hSQ001551	repname(hSQ001551)	5.28547	5.70989	5.45928	6.94888	5.55561
hSQ001553	3156	6.55202	9.0267	6.73636	8.94815	7.92263
hSQ001558	55917	6.98479	6.91748	6.86215	7.14392	6.1813
hSQ001559	11140	6.67911	7.22015	6.0769	7.87316	7.27716
hSQ001563	repname(hSQ001563)	4.96076	5.34832	5.217	7.10605	5.07584
hSQ001565	284942	3.20195	2.98702	3.05579	3.52194	2.9462
hSQ001569	51559	5.09887	5.94365	5.54365	6.65513	5.39667
hSQ001571	92912	2.50663	3.05211	2.55175	3.01095	2.87679
hSQ001574	400960	2.36431	2.9525	2.16995	2.49972	2.3689
hSQ001575	83608	4.69426	4.85635	4.88682	5.12644	4.89376
hSQ001578	83903	5.78502	5.60704	6.37141	6.49656	5.33325
hSQ001579	repname(hSQ001579)	6.50512	6.89382	8.42449	7.10675	7.35633
hSQ001582	11319	9.27175	11.1817	9.23016	9.35034	9.27743
hSQ001586	10580	7.00872	6.26254	8.03064	7.25234	7.07116
hSQ001587	79022	3.35675	3.89889	3.39041	3.97745	3.63209
hSQ001589	84920	6.20169	6.74274	6.583	7.49593	6.51614
hSQ001591	401904	5.41916	4.82975	5.76536	5.13579	5.02111
hSQ001592	8496	6.30375	6.00074	7.1443	7.51559	6.66472
hSQ001593	5577	2.36672	5.26173	5.87797	4.64675	3.93435
hSQ001603	54206	4.03186	2.96329	4.6466	4.30167	3.88743
hSQ001605	79066	5.23831	5.86536	5.19822	5.84549	5.21459
hSQ001608	9659	6.66623	7.60483	6.60509	7.08898	6.95549
hSQ001609	3014	5.01076	6.41388	5.3662	6.59663	5.23589
hSQ001611	80851	5.00055	6.25929	4.70183	5.3627	4.93164
hSQ001617	1022	6.47297	6.78597	5.2657	6.31943	6.28665
hSQ001619	51076	4.71915	5.1112	5.73018	5.50176	5.83281
hSQ001626	6793	5.61181	6.90733	6.86369	6.94387	5.83297
hSQ001627	310	6.71152	8.22588	6.12092	7.50383	6.83073
hSQ001629	10424	4.07337	4.17748	4.08501	3.70834	3.75842
hSQ001630	51626	5.72409	6.92621	6.27826	6.58926	6.85761
hSQ001632	442158	4.91814	4.05886	4.85011	4.73408	3.90071
hSQ001634	442441	5.11366	6.11272	4.89998	5.54474	5.18163
hSQ001637	285321	3.46007	5.561	3.80133	5.03715	4.72892
hSQ001639	388579	10.2055	10.4631	9.56564	10.7452	8.72579
hSQ001642	221362::730101	3.91961	4.64262	3.90311	4.38273	4.11733
hSQ001649	126170	6.91067	6.62198	6.85079	6.80734	5.87443
hSQ001653	29087	6.36703	6.9914	5.53819	5.92011	6.06537
hSQ001655	256355	5.13219	4.50387	4.96829	5.5689	4.8869
hSQ001657	5430	7.46694	8.81369	7.3188	8.17219	6.9384
hSQ001658	54832	4.48788	4.87409	4.59239	5.62125	4.70829
hSQ001659	5111	14.1354	11.2342	14.3144	12.0724	12.2978
hSQ001664	7533	6.20271	6.97997	8.82532	6.82163	8.01235
hSQ001665	9820	4.28725	5.83996	4.90557	5.35417	4.93631
hSQ001668	3078	2.27879	3.02085	2.4252	2.60953	2.55139
hSQ001669	79962	3.22581	4.09544	3.73276	4.15743	3.3606
hSQ001670	24140	4.50635	5.04275	4.18369	4.86681	4.72345
hSQ001672	896	4.87836	6.26805	5.36229	5.95399	4.88959
hSQ001675	8649	3.71975	3.60222	4.33075	3.95324	4.19934
hSQ001676	440548	3.02322	4.01473	2.90216	3.73368	3.08147
hSQ001681	4566::4568	3.49295	5.19459	4.17879	4.79901	3.78259
hSQ001683	317649	2.00529	2.56116	2.5249	2.80104	2.71882
hSQ001696	221935	5.54826	5.98127	6.55224	6.32091	5.78625
hSQ001699	79017	4.30676	4.49915	4.87608	4.46486	4.7233
hSQ001705	51095	3.35635	4.86893	4.64155	5.14592	4.39483
hSQ001706	150291	5.96234	8.8623	6.70621	9.13689	6.61425
hSQ001716	6141	8.90028	7.70741	7.84628	8.95398	8.85442
hSQ001721	1978	4.95578	5.34193	5.34695	5.90309	4.04853
hSQ001722	90480	5.05576	5.73794	4.58144	5.98319	5.61691
hSQ001724	54892	6.70018	6.05882	7.16018	6.7362	5.82862
hSQ001725	55696	7.20737	6.64466	7.67823	8.19761	7.21346
hSQ001726	6130	8.34372	8.2536	8.78387	8.05527	5.35998
hSQ001729	644823::442573	3.26166	3.97427	2.96146	3.46286	3.27754
hSQ001731	27335	7.49973	6.85772	8.11645	7.71013	8.28758
hSQ001734	25836	7.3101	8.35471	6.85677	7.83055	6.94708
hSQ001736	53838	3.52441	4.34593	3.89991	4.21473	3.44161
hSQ001737	401522	2.99586	4.48334	2.93125	3.66489	3.48587
hSQ001738	2923	10.4799	11.0495	10.9008	10.7877	7.06576
hSQ001740	84140	4.60642	6.58156	6.71306	6.51185	5.64829
hSQ001741	51503	4.78173	4.74829	4.7867	4.85561	5.1368
hSQ001742	283651	4.44157	5.05577	3.52886	4.50693	4.29633
hSQ001743	64577	4.2473	6.00469	5.24953	5.58245	5.35879
hSQ001747	6166	9.05888	7.60686	9.59424	8.27667	5.73042
hSQ001749	57650	5.95907	4.10314	7.32676	7.45258	5.70428
hSQ001751	4891	3.6467	5.67867	4.99871	4.90463	4.662
hSQ001753	51067	7.45167	7.93301	7.56358	7.65569	8.09802
hSQ001763	51192	2.74533	2.85522	3.59524	3.47659	3.39059
hSQ001768	8454	8.22346	8.92349	7.54726	8.31598	8.28129
hSQ001769	8601	2.19103	3.18882	2.76881	3.0848	3.04094
hSQ001770	378805	2.53301	3.35257	2.52716	3.35091	3.18172
hSQ001774	8544	7.82858	8.24511	7.36704	7.5633	7.83764
hSQ001780	387882	2.54148	3.12716	2.80336	3.36446	2.54847
hSQ001783	23155	6.69298	7.74298	6.38283	6.87394	5.93878
hSQ001800	112770	5.12688	5.95446	4.48225	5.72532	5.20539
hSQ001804	79882	6.36779	7.97411	6.16518	6.54085	6.66456
hSQ001808	4170	5.95399	7.37629	5.54376	6.67439	6.32129
hSQ001811	6141	7.86341	5.38667	6.99932	7.54755	7.86404
hSQ001813	79665	6.64284	6.99777	6.44902	6.87689	6.15266
hSQ001817	5188	7.13278	8.0716	6.44168	7.66958	7.69103
hSQ001818	170463	3.07484	3.66414	2.68421	3.79539	3.67655
hSQ001820	158381	4.71725	5.37091	4.76465	5.46491	5.40325
hSQ001821	379025	3.70923	3.68236	3.93315	3.93335	3.77229
hSQ001823	10939	7.20025	8.23234	7.29789	7.27452	6.87439
hSQ001826	91392	3.44828	4.61231	3.89826	4.16286	3.82944
hSQ001827	25936	4.20176	3.80784	3.75341	4.28711	4.22505
hSQ001829	51447	4.06827	4.62292	3.63464	4.50135	4.31629
hSQ001830	7503	4.65908	4.30268	4.76386	4.8406	3.9932
hSQ001831	2483	6.28766	5.23919	6.20832	6.1227	5.49714
hSQ001832	6173	6.81013	6.67006	6.73016	6.02697	6.25316
hSQ001833	304	9.36271	9.82206	8.23918	9.41352	8.25524
hSQ001834	22839	5.03091	6.73096	5.23685	5.86922	5.43807
hSQ001836	439967	3.41746	3.92157	3.3754	3.90603	2.71293
hSQ001838	441866	6.26724	6.05798	6.86934	6.38851	5.8641
hSQ001840	80153	6.38517	6.54061	6.16688	6.87297	6.1502
hSQ001841	51028	4.23674	4.83689	4.5893	5.12405	4.51118
hSQ001842	4116	6.5574	6.31713	6.83892	5.81802	6.50371
hSQ001853	2965	3.47292	3.84365	3.29648	3.86336	3.73727
hSQ001854	79158	3.42039	3.26079	3.37517	3.88466	3.52183
hSQ001856	1211	7.22663	7.689	7.5079	8.18657	7.52891
hSQ001858	1537	5.6141	5.78021	5.45794	6.8287	5.4751
hSQ001859	54856	6.55748	7.08869	6.45466	6.53005	5.71698
hSQ001860	27295	4.62721	5.21701	4.42687	5.14495	5.06919
hSQ001867	10797	6.5854	6.48315	6.41806	6.35631	6.89758
hSQ001874	11031	3.1215	3.72026	3.43383	3.86256	3.48653
hSQ001882	23163	5.15698	5.33981	4.88848	5.5754	5.4186
hSQ001883	391809	3.18543	5.47708	3.93973	5.98951	3.58184
hSQ001885	1660	6.60669	9.40992	5.64595	12.334	7.66377
hSQ001886	79140	5.07624	6.23286	4.31357	5.51727	5.46623
hSQ001899	10076	5.52415	6.15835	5.79468	5.40197	4.9892
hSQ001904	9400	5.27185	6.40909	5.79125	5.99752	5.61006
hSQ001908	5710	8.5571	8.45214	8.01957	9.19624	7.28951
hSQ001910	5727	4.47237	3.96411	4.86807	4.97544	4.41324
hSQ001911	5464	9.67316	8.55402	11.7062	10.6445	8.05822
hSQ001912	1434	6.65523	7.0242	6.64066	8.57939	8.05548
hSQ001913	140862	4.37455	4.57738	4.79353	4.44778	4.64243
hSQ001920	9603	6.6258	8.28858	6.51049	7.2099	6.78877
hSQ001922	27238	8.58421	9.35709	7.77367	8.32893	8.52226
hSQ001923	51538	4.75262	4.32665	4.23142	4.19899	3.75641
hSQ001933	162632	5.27371	6.4522	5.54253	5.81138	5.74956
hSQ001935	6629	11.8336	9.49314	10.5053	9.65814	8.31396
hSQ001939	145767	6.26459	6.41378	6.44742	7.05597	4.70576
hSQ001940	51042	3.44203	4.35282	3.29505	4.42309	4.17615
hSQ001943	10043	5.77621	7.23949	5.00263	6.96778	6.64147
hSQ001944	10138	2.96518	3.89721	3.93562	4.17415	4.24076
hSQ001949	9218	6.05928	6.69259	6.68949	6.65147	7.35467
hSQ001950	11345	4.84504	5.51621	4.81505	5.05037	4.69999
hSQ001952	5201	3.78689	4.13091	3.31769	4.0795	4.00647
hSQ001953	5202	4.33286	5.41146	4.25984	4.49273	4.36136
hSQ001956	58505	2.91009	2.66986	3.62056	3.55074	2.80036
hSQ001958	2768	2.69582	3.11295	3.02544	3.05634	2.68276
hSQ001959	10227	5.00295	5.16464	4.80985	5.58961	4.63524
hSQ001960	55245	5.48056	6.08943	4.44299	5.84852	5.22375
hSQ001961	157567	8.75747	7.76485	8.60918	8.38474	9.92097
hSQ001962	55161	7.16436	7.38733	8.47041	7.20522	7.36057
hSQ001963	1945	5.16562	5.64263	4.7617	5.76112	5.35193
hSQ001966	129831	7.83132	7.06535	7.69418	7.48673	7.23171
hSQ001967	283464	5.68797	5.24945	6.56109	5.54619	5.13278
hSQ001969	51347	5.6755	6.32891	7.48651	6.21889	6.09316
hSQ001971	54801	3.81556	4.87609	5.15076	5.48106	4.77627
hSQ001972	8536	4.4035	5.2106	4.08067	5.24435	4.79475
hSQ001975	389385	7.90742	9.25105	6.85782	8.47363	7.95978
hSQ001978	81562	6.0811	6.6087	5.74808	5.45193	5.13721
hSQ001979	29068	2.83847	3.38979	3.10927	3.59466	3.17719
hSQ001980	9099	4.73865	5.69173	5.56799	5.781	5.15594
hSQ001982	9221	9.57255	9.9769	8.87443	9.2934	8.8449
hSQ001988	285971	4.76865	6.46354	5.04159	5.50371	5.86142
hSQ001991	23170	5.92031	7.2758	5.54191	6.42715	6.42575
hSQ001997	344371	6.73855	7.10298	5.69152	7.31568	6.22931
hSQ001998	440085	8.24763	6.53328	7.82338	6.12902	5.06542
hSQ002000	135295	3.7783	4.95531	3.79844	4.70299	4.44423
hSQ002003	64965	7.79214	7.66519	6.43612	7.40175	7.46408
hSQ002005	85007	3.2528	4.10603	3.12533	3.97531	3.40635
hSQ002010	501	7.96172	8.96623	6.88478	7.84933	7.94363
hSQ002021	6883	4.46841	4.62945	4.35821	4.54732	4.66213
hSQ002025	147172	3.36038	3.82866	3.80262	3.93663	3.4982
hSQ002026	51602	7.08313	8.25994	8.03738	8.80712	6.67693
hSQ002033	57510	7.72915	9.66385	8.12083	8.8373	7.34716
hSQ002036	84769	4.73981	5.6891	4.42145	5.6541	5.22189
hSQ002038	286256	3.67469	6.15345	4.251	4.9734	4.89382
hSQ002040	6829	7.17644	7.98974	7.15536	7.18916	7.07216
hSQ002047	9455	2.42988	3.12004	2.36187	2.83831	2.3066
hSQ002048	94239	4.80772	4.80892	5.59979	5.76569	4.17645
hSQ002049	55357	5.1492	7.0097	5.13527	5.62637	5.85181
hSQ002052	125150	3.05431	3.34645	3.2386	3.38637	3.05446
hSQ002059	7704	5.00464	5.9112	5.35421	5.66899	4.69702
hSQ002061	5499	5.63323	6.25001	5.80142	6.52782	6.38881
hSQ002070	5032	3.1418	4.66278	3.06532	4.4469	3.63196
hSQ002078	64975	3.99849	4.57825	4.32126	5.34329	4.88495
hSQ002079	64753	4.99347	6.44185	5.854	5.78492	5.32242
hSQ002080	51465	3.40509	4.25813	4.18206	4.56654	4.45612
hSQ002082	284029	2.17799	2.88561	2.43952	2.518	2.5626
hSQ002083	9526	5.41965	5.67605	4.52869	5.80061	5.60887
hSQ002085	285368	3.15362	5.01864	3.66883	4.49312	3.81106
hSQ002087	83463	4.02793	4.84826	3.46888	4.67278	4.48112
hSQ002088	5376	4.75281	5.57221	5.15086	5.36672	5.44251
hSQ002092	10449	5.3461	5.38521	4.54169	5.77238	5.12052
hSQ002093	1024	5.3003	6.58271	5.10353	5.64877	5.15062
hSQ002099	7335	3.8041	5.13872	4.07971	4.98993	4.11962
hSQ002107	567	4.71694	4.47943	4.83398	4.38855	4.68388
hSQ002108	567	4.3913	3.89757	4.62714	4.3207	3.98212
hSQ002110	7584	4.47244	4.91509	4.18085	4.1526	4.30647
hSQ002115	5442	7.07378	8.44756	6.34163	7.40046	7.3008
hSQ002117	23049	4.28391	4.13382	4.62378	6.131	4.35596
hSQ002118	27068	4.71325	4.59077	4.64849	5.15122	5.34127
hSQ002120	84133	3.70552	3.57386	3.88947	4.09052	3.64318
hSQ002124	10988	9.67117	8.1455	11.5842	9.39906	7.90812
hSQ002125	55028	4.83769	6.20659	5.11171	5.66536	5.42206
hSQ002126	55215	6.60713	7.12419	6.44018	7.28963	5.64005
hSQ002127	7558::7582	3.30199	3.36177	3.55472	3.86168	3.60035
hSQ002129	4150	3.37632	4.47347	3.06109	3.96836	3.69339
hSQ002131	5193	6.54009	7.17599	6.79013	6.62967	6.58065
hSQ002135	283412	8.32079	6.62179	8.32296	8.72146	5.37529
hSQ002138	55004	3.13546	3.65355	3.11242	3.93419	3.07506
hSQ002140	57018	3.53221	3.93369	3.1943	4.03174	3.78904
hSQ002142	4839	7.03118	8.60004	7.15682	8.13969	7.13163
hSQ002143	63027	2.93629	4.8022	3.33426	3.95327	3.98691
hSQ002148	6470	6.95071	8.38674	6.09361	7.43137	6.81048
hSQ002149	53340	5.11553	6.02154	4.35396	5.02476	4.78818
hSQ002150	10102	7.22661	6.62937	6.28095	7.01716	7.58341
hSQ002152	5886	4.22706	4.22479	4.32794	4.83549	3.96991
hSQ002154	55556	4.43746	5.42136	4.30576	5.08218	4.35922
hSQ002162	9978	5.57135	4.89455	5.82948	5.07994	5.83278
hSQ002166	1737	8.36115	8.61404	7.72027	8.1709	8.38271
hSQ002168	389816	3.77499	5.44606	3.84505	4.45737	4.30572
hSQ002179	6633	4.09376	5.25456	4.18733	5.05151	4.91903
hSQ002181	220906	6.2078	6.23468	6.01695	6.10385	5.51235
hSQ002184	8792	3.47148	5.17085	4.17492	4.40971	4.15938
hSQ002188	252983	7.72001	7.92071	6.61054	7.73161	7.39682
hSQ002190	3308	10.8395	11.9212	10.0935	11.0701	9.87159
hSQ002202	57156	5.45302	7.28458	5.20186	5.28464	4.45961
hSQ002204	5691	7.89714	7.83569	6.84765	7.11481	6.89357
hSQ002208	3909	5.16126	6.89434	5.13815	5.83456	6.06203
hSQ002209	64924	2.8447	4.14397	3.02898	3.85265	3.48293
hSQ002211	55779	2.77922	3.55291	2.83357	3.42147	2.38961
hSQ002212	8717	3.92856	5.47511	3.50937	4.85361	4.58146
hSQ002215	9726	3.95913	4.75893	4.45896	4.50017	4.61791
hSQ002217	1994	7.08618	7.38038	6.63079	7.40416	7.47037
hSQ002219	143888	4.57801	5.44096	5.81949	5.61076	5.30699
hSQ002220	85007	3.4243	4.24457	3.35511	4.03986	3.29744
hSQ002225	55657	3.45568	3.54953	3.10164	4.27203	3.1567
hSQ002228	90407	4.20707	5.36205	4.21645	5.15851	4.12988
hSQ002241	26233	4.20813	4.81783	3.98851	4.71403	4.38349
hSQ002244	83460	4.23914	4.06893	3.98929	4.40639	4.2151
hSQ002246	7453	6.86473	6.90389	7.34747	7.27966	6.63201
hSQ002250	8417	4.49977	5.49175	5.04354	4.66446	5.36732
hSQ002251	repname(hSQ002251)	2.81413	2.51169	2.95619	2.64452	2.51248
hSQ002251	repname(hSQ002251)	2.82811	2.41321	2.93879	2.69948	1.69645
hSQ002251	repname(hSQ002251)	2.87741	2.10792	2.88931	2.68484	2.33981
hSQ002251	repname(hSQ002251)	2.901	2.58391	2.93937	2.64509	1.96525
hSQ002251	repname(hSQ002251)	2.76814	2.60522	2.96426	2.7348	2.59708
hSQ002253	118472	3.42465	4.03641	3.39639	4.16273	4.02367
hSQ002261	1363	6.1863	6.38548	6.30067	6.76541	6.57348
hSQ002265	127933	3.2533	5.25966	4.37395	4.31055	3.852
hSQ002268	repname(hSQ002268)	35.4337	36.0327	32.8701	51.7736	44.1227
hSQ002268	repname(hSQ002268)	32.4592	35.3659	31.3344	50.0384	35.2356
hSQ002268	repname(hSQ002268)	32.4215	31.0712	30.8285	51.5895	35.5319
hSQ002268	repname(hSQ002268)	33.2746	34.4916	27.6115	51.7754	39.8507
hSQ002268	repname(hSQ002268)	31.9608	35.4524	27.3875	47.0056	33.8677
hSQ002269	442209	7.18168	7.09661	7.67676	7.07445	6.07865
hSQ002270	168850	4.87743	6.39457	5.51532	6.13323	5.89224
hSQ002272	3312	14.3219	13.7718	15.0581	14.748	14.3183
hSQ002278	10664	8.89654	8.91615	9.48163	8.52266	7.83761
hSQ002280	9372	4.61267	7.35019	7.06248	5.79195	4.85776
hSQ002283	140739	2.89836	2.92009	3.06978	3.60884	3.55435
hSQ002285	64225	5.57997	6.90353	5.29867	6.27501	6.15914
hSQ002286	54764	4.42978	4.74971	4.55591	4.56479	3.92897
hSQ002297	5690	7.36474	7.24664	7.41059	7.05419	6.45247
hSQ002298	1938	6.34089	7.71719	5.8823	8.76093	6.05139
hSQ002302	85007	3.2025	4.87023	3.60333	4.23155	3.33908
hSQ002304	23148	6.35064	8.45732	6.91075	6.99265	6.0492
hSQ002304	23148	6.19971	8.28665	6.67457	7.12133	6.00433
hSQ002306	10867	4.00371	6.11197	4.44227	5.23972	5.08444
hSQ002308	64852	6.89115	8.30562	6.13481	7.98438	7.12249
hSQ002312	repname(hSQ002312)	2.21389	3.30943	2.06266	3.01416	1.97026
hSQ002313	6217	4.08716	4.50042	4.63355	5.0123	4.85667
hSQ002315	91368	2.95676	4.09859	3.07676	4.39208	3.61061
hSQ002317	85865	6.33788	6.7656	5.34858	6.18707	6.05388
hSQ002320	55626	8.11196	8.37401	8.64038	8.88499	7.16081
hSQ002324	79745	2.47775	2.83602	2.54094	3.29129	2.69723
hSQ002328	59338	3.23998	4.87881	4.05632	4.21704	4.24597
hSQ002329	80204	6.4863	7.13363	6.25014	7.00168	6.08582
hSQ002331	54469	3.10969	3.88712	3.04735	3.51335	3.87616
hSQ002338	repname(hSQ002338)	2.15185	2.57198	1.97678	2.42833	2.24234
hSQ002341	29890	3.68403	4.31166	3.6483	4.35053	3.30012
hSQ002344	7490	6.77527	7.80941	8.13865	7.45387	6.88457
hSQ002346	10939	7.77003	11.7802	8.14321	8.35042	7.92508
hSQ002348	92815	4.64501	5.20958	3.86549	5.7277	4.70538
hSQ002349	3913	5.00261	7.23017	6.27897	6.50684	5.43
hSQ002356	57473	4.81934	5.76472	4.68539	5.4403	4.90393
hSQ002361	10848	6.33978	8.30105	6.84492	5.78149	5.40663
hSQ002362	341412	5.56095	4.59605	6.2771	5.4878	3.68749
hSQ002363	2177	4.77795	5.7568	5.21472	7.18407	5.68381
hSQ002366	58504	4.24369	5.27826	4.06698	4.8843	4.90201
hSQ002368	64924	3.16677	4.26936	3.34851	4.13951	4.05248
hSQ002371	2907	4.57644	5.86652	5.23635	5.21674	5.142
hSQ002373	977	4.84085	6.5044	5.16251	5.56158	5.43655
hSQ002379	340335	2.80407	4.49641	4.0531	4.88107	3.63796
hSQ002382	9674	4.07312	5.20218	4.53167	3.9838	4.15011
hSQ002385	126070	4.58718	5.62946	5.12979	6.11073	4.69759
hSQ002389	10126	2.89732	3.72203	3.00028	3.73768	3.62613
hSQ002390	26036	4.88446	6.46435	5.82979	6.23647	5.64256
hSQ002391	5937::192137	5.58223	5.81848	5.05092	4.85234	4.99208
hSQ002393	80014	3.99248	3.22198	4.49549	4.56646	3.92761
hSQ002402	55094	5.21937	5.66334	5.18693	5.71781	5.56277
hSQ002405	64844	6.40104	6.46477	6.26951	6.85555	6.55694
hSQ002406	repname(hSQ002406)	13.4091	16.1864	11.2793	16.2308	13.0911
hSQ002408	23107	5.92736	7.12218	5.23028	6.48944	6.01124
hSQ002412	6713	7.69	8.85669	7.38516	8.36218	8.03033
hSQ002413	200894	5.75535	6.91603	6.34505	5.83295	5.66324
hSQ002414	388460	7.57326	5.79683	7.63185	7.29076	6.06256
hSQ002415	55284	3.56544	3.9403	3.35855	3.77485	3.85418
hSQ002416	79414	3.48864	4.58124	4.40499	4.55177	4.00694
hSQ002422	54802	4.47043	5.7843	4.49461	5.35625	4.55727
hSQ002426	23312	4.28554	4.02598	4.01549	5.05018	4.23115
hSQ002430	3508	5.30028	5.59071	5.82011	6.0008	5.93223
hSQ002439	2058	9.49991	8.99967	10.5411	10.7406	9.88226
hSQ002440	160428	5.72612	5.88157	6.16509	6.52382	5.6576
hSQ002450	24139	4.39303	6.16851	5.56472	5.01171	4.16139
hSQ002452	84321	7.54241	7.7454	7.55898	8.16744	8.52185
hSQ002453	26002	6.21692	7.52042	6.34626	6.4288	6.43214
hSQ002454	1622	5.19833	4.5626	5.35824	4.98116	5.42588
hSQ002456	440001	3.80898	3.68773	4.99486	4.7344	4.20885
hSQ002458	25816	4.496	3.90661	4.55693	4.33664	4.71164
hSQ002461	repname(hSQ002461)	2.04311	2.5044	1.9269	2.4375	1.90722
hSQ002463	55631	7.39961	6.80555	8.02707	8.40064	8.67304
hSQ002464	344729	2.7595	3.56489	2.55529	3.73803	3.5223
hSQ002465	51019	4.04492	4.49759	4.00274	4.36188	3.85039
hSQ002467	11041	8.58011	8.62527	8.89138	8.94356	9.16148
hSQ002469	10342	8.95303	6.93997	8.61705	8.50617	7.95166
hSQ002471	90459	5.34434	6.17363	5.99941	6.01778	5.71743
hSQ002474	2054	2.88586	3.4456	3.16272	3.19961	2.95154
hSQ002479	55319	5.79942	5.74982	6.83898	6.18481	5.38104
hSQ002480	25914	5.01257	5.68516	5.29352	5.52186	5.01626
hSQ002481	10428	4.78525	5.84197	4.93365	4.86783	4.41617
hSQ002483	5936	7.65921	7.8197	6.68361	7.56827	7.59908
hSQ002488	400879	3.76177	4.19041	3.75466	4.18176	3.54953
hSQ002491	81691	5.95018	6.2033	5.46115	6.4003	5.96574
hSQ002493	25957	4.26794	4.5632	4.97047	5.31833	4.32304
hSQ002494	7468	4.35463	4.95103	4.34795	5.36819	3.96046
hSQ002495	11101	4.49178	5.71799	4.48906	4.96047	4.7371
hSQ002498	205	3.44892	3.91349	4.67884	4.61361	4.41411
hSQ002499	26150	4.08865	4.81139	4.19784	4.25758	3.69127
hSQ002502	57409	3.98744	4.96425	3.87739	4.67326	4.10087
hSQ002507	50807	4.91436	5.60358	5.60776	5.75471	5.04551
hSQ002508	3217	5.18173	5.48332	4.77508	5.37309	4.85758
hSQ002511	50809	3.87633	3.7361	3.99796	5.07606	4.15067
hSQ002512	11325	6.70819	6.60971	7.78661	7.10761	5.75508
hSQ002515	7336	4.98311	4.01641	5.27383	4.73118	4.80191
hSQ002516	79635	5.70607	6.24697	5.28523	5.43319	5.22826
hSQ002517	23028	8.09	7.80114	8.83021	8.82524	8.92874
hSQ002519	567	4.08236	4.11464	4.23957	4.29053	4.42442
hSQ002520	51054	2.91556	3.2274	3.43938	2.82933	2.66678
hSQ002525	199857	3.80525	4.03337	3.87811	3.95197	3.50389
hSQ002529	5830	6.10077	6.35853	5.31766	5.92407	6.05848
hSQ002533	10971	7.02238	6.61755	8.62127	7.37346	7.69877
hSQ002535	26140	3.26733	3.87542	3.04304	3.77979	3.10444
hSQ002536	79850	3.88843	4.86203	4.74938	4.01397	3.67399
hSQ002540	10159	9.92595	9.77027	11.5717	10.1587	10.8138
hSQ002542	8165	6.20566	6.33435	5.99157	6.71911	5.91371
hSQ002543	95	5.24692	6.34884	4.5222	6.09104	5.1633
hSQ002546	1649	4.02352	4.51711	3.32114	4.08843	3.66775
hSQ002549	567	4.81718	4.49144	4.77195	4.49993	4.24412
hSQ002550	567	4.79783	4.52529	4.72814	4.38107	4.5779
hSQ002551	567	4.48881	4.09345	4.73948	4.50641	4.01145
hSQ002552	567	4.95804	4.55248	5.11906	4.6178	4.37038
hSQ002553	567	5.05853	4.59682	5.20828	4.68116	4.35426
hSQ002554	567	4.87438	4.60907	4.97105	4.44474	4.88325
hSQ002555	567	5.07244	4.58736	5.19838	4.49005	5.01537
hSQ002555	567	4.91391	4.61915	5.17725	4.55251	4.95092
hSQ002555	567	4.75089	4.6613	4.51698	4.5329	4.58788
hSQ002555	567	4.95526	4.65084	5.2454	4.6046	4.73136
hSQ002555	567	5.10452	4.67249	5.38751	4.60918	5.36284
hSQ002555	567	4.97707	4.60757	5.24087	4.457	5.3342
hSQ002555	567	4.9711	4.67372	5.29464	4.53117	4.43538
hSQ002555	567	5.06638	4.65213	5.34097	4.70959	4.45674
hSQ002555	567	5.14997	4.65024	5.34648	4.62635	5.18148
hSQ002555	567	5.21379	4.67926	5.46856	4.76217	5.45714
hSQ002555	567	5.16367	4.72445	5.45385	4.65524	4.51462
hSQ002555	567	5.05633	4.71174	5.47131	4.75861	4.4551
hSQ002555	567	5.21738	4.6841	5.5246	4.67821	5.46814
hSQ002555	567	5.11995	4.62243	5.38421	4.72531	5.3325
hSQ002555	567	5.20977	4.74506	5.47412	4.77955	4.5785
hSQ002555	567	5.18495	4.70438	5.44187	4.78003	4.47649
hSQ002555	567	5.20413	4.61986	5.53879	4.75091	5.45668
hSQ002555	567	5.05132	4.61265	5.2978	4.69449	5.1443
hSQ002555	567	5.11967	4.65615	5.40576	4.78248	4.51702
hSQ002555	567	5.13646	4.58825	5.43221	4.75751	4.46689
hSQ002555	567	5.21291	4.51399	5.44349	4.72543	5.34255
hSQ002555	567	5.1718	4.57545	5.38777	4.73651	5.34491
hSQ002555	567	5.25381	4.54275	5.49676	4.83472	4.50212
hSQ002555	567	5.1457	4.27568	5.42473	4.76467	4.44108
hSQ002555	567	5.21627	4.37335	5.6331	4.77793	5.32384
hSQ002555	567	5.18013	4.49485	5.45356	4.75369	5.21142
hSQ002555	567	5.10294	4.5013	5.19923	4.73237	4.39577
hSQ002555	567	5.13936	4.39208	5.32315	4.73016	4.44499
hSQ002555	567	5.12982	4.5763	5.36533	4.76789	4.47239
hSQ002555	567	5.19055	4.48622	5.4051	4.79811	5.20579
hSQ002555	567	5.01385	4.59416	5.33876	4.76697	5.31782
hSQ002555	567	5.25359	4.61526	5.44064	4.86243	4.48459
hSQ002555	567	4.71299	4.60056	5.10584	4.68287	4.3902
hSQ002555	567	5.02402	4.71119	5.42683	4.82678	4.45193
hSQ002555	567	5.00133	4.54533	5.10396	4.66137	4.91377
hSQ002555	567	5.13309	4.63366	5.24546	4.74714	5.07897
hSQ002555	567	5.11067	4.64695	5.23463	4.72424	4.48916
hSQ002555	567	5.06638	4.5883	5.18326	4.66438	4.45572
hSQ002555	567	5.12768	4.17534	5.20433	4.71717	4.61983
hSQ002555	567	5.20699	4.61044	5.32684	4.66886	5.04199
hSQ002555	567	5.29508	4.72866	5.31055	4.74576	5.16956
hSQ002555	567	5.30395	4.75675	5.45188	4.92344	5.32262
hSQ002555	567	5.16536	4.69562	5.18475	4.77781	5.15412
hSQ002555	567	5.0211	4.59644	5.10229	4.71448	4.75223
hSQ002555	567	5.17954	4.75929	5.25868	4.75731	5.12178
hSQ002555	567	5.26388	4.76165	5.31773	4.83144	4.52612
hSQ002555	567	5.10505	4.66842	5.24886	4.78144	4.50654
hSQ002555	567	5.30212	4.65726	5.37663	4.82036	4.50469
hSQ002555	567	5.11462	4.69531	5.22205	4.63777	5.12038
hSQ002555	567	5.04735	4.77819	4.05642	4.75381	4.47444
hSQ002555	567	5.08897	4.74369	5.39833	4.7015	4.47352
hSQ002556	567	4.57876	4.17323	4.73446	4.37392	4.41608
hSQ002557	567	4.5549	4.52366	4.36135	4.4708	4.63957
hSQ002558	567	5.00894	4.13316	5.03505	4.62336	4.82103
hSQ002559	567	4.21214	4.06855	4.37632	4.28653	3.89926
hSQ002560	567	4.85971	4.46195	4.93653	4.56638	4.69413
hSQ002562	567	4.75831	4.43682	4.77817	4.40202	4.30698
hSQ002567	10052	4.94878	5.93343	5.32104	5.10969	5.19634
hSQ002569	repname(hSQ002569)	3.31648	2.85204	3.82001	3.0814	1.81986
hSQ002569	repname(hSQ002569)	3.39934	2.83853	3.97164	3.06667	3.15543
hSQ002569	repname(hSQ002569)	3.53778	2.92792	3.77328	3.09345	1.78883
hSQ002569	repname(hSQ002569)	3.42922	2.81764	3.76198	3.05871	3.08766
hSQ002569	repname(hSQ002569)	3.2704	2.8904	4.07962	3.2317	3.14202
hSQ002571	54536	7.32391	7.78993	8.349	8.48112	7.14143
hSQ002574	8636	4.70814	4.05308	4.83608	5.42484	4.85195
hSQ002576	55170	3.71206	3.46264	3.4628	3.87117	4.141
hSQ002577	4644	5.86001	6.85457	6.57873	6.16166	5.93028
hSQ002579	56890	3.41359	4.1516	3.60389	4.33211	3.66218
hSQ002583	51629	5.23376	4.26946	5.90435	5.60042	5.24971
hSQ002587	517	6.97943	5.3637	7.14195	6.74138	6.6727
hSQ002588	7247	5.79412	6.81859	7.15544	6.70742	7.08097
hSQ002589	400571	5.41964	6.23504	4.75741	6.04623	4.69359
hSQ002591	23654	5.4626	6.81042	5.65955	5.62388	4.63255
hSQ002594	196792	2.20207	2.96151	2.47697	2.67708	2.42789
hSQ002595	55862	5.24782	4.95751	5.15419	5.25104	4.97568
hSQ002596	23102	5.12856	6.10316	5.39108	5.61582	5.53912
hSQ002599	7485	3.04406	3.06437	3.15397	3.16156	2.94253
hSQ002606	91614	6.6512	6.40295	7.26588	7.62721	6.59073
hSQ002609	55222	2.91804	4.35271	3.29717	4.11086	4.10217
hSQ002611	55342	5.83061	5.98103	7.1402	7.23835	6.65114
hSQ002612	192111	3.92653	4.68895	3.68256	5.01472	4.47388
hSQ002613	146542	2.78207	3.82982	2.55376	3.56584	3.29976
hSQ002614	10011	4.69484	5.21933	4.2671	5.20199	5.27793
hSQ002616	1819	5.94582	6.86008	5.26469	5.87331	5.4251
hSQ002620	6617	4.96495	6.06823	5.42447	6.00197	6.13841
hSQ002621	64432	5.81458	5.76878	5.82571	6.00642	5.4433
hSQ002624	114928	8.53214	8.77727	8.58779	8.93298	8.70593
hSQ002631	26263	4.26034	4.93248	5.02063	4.83732	4.46783
hSQ002633	23358	5.93756	5.60792	6.10344	7.02519	6.17759
hSQ002635	1595	10.0714	8.75913	11.6346	9.95242	10.8862
hSQ002639	26240	6.4275	7.57257	6.18551	6.83432	6.38565
hSQ002642	144203	3.52599	3.72187	3.00522	3.70764	3.11484
hSQ002646	4904	13.7293	10.1622	11.0393	10.8731	7.80863
hSQ002649	5530	7.4596	8.12159	8.16266	8.0298	7.377
hSQ002650	6760	5.64545	5.72543	6.03351	6.06696	5.87381
hSQ002651	286423	4.78574	5.49227	4.20533	5.54872	4.68595
hSQ002652	905	3.48519	3.50835	3.2416	4.78868	3.38491
hSQ002653	57217	5.15358	6.68151	5.37539	4.66872	3.79375
hSQ002655	8887	7.88288	7.62548	6.76014	8.08142	7.34733
hSQ002659	80063	3.99118	5.2237	4.4162	4.58961	4.27504
hSQ002660	29979	7.90255	7.62994	7.27804	7.57326	7.2975
hSQ002663	5563	5.20067	6.50603	6.21733	5.59613	5.75593
hSQ002666	440921	5.21341	5.02281	4.75573	5.01866	5.70584
hSQ002668	989	9.10994	7.86358	8.3644	8.48971	9.06956
hSQ002671	26953	5.27347	5.60501	5.39568	6.53413	5.07839
hSQ002675	5305	3.0945	5.1141	4.45695	4.64419	3.96118
hSQ002676	372	10.6389	8.21308	12.9432	10.8982	10.5223
hSQ002679	10184	3.83874	5.04857	4.19322	4.65826	4.18999
hSQ002681	7172	3.49383	2.92313	4.09598	3.92051	3.57943
hSQ002684	55183	5.60215	7.40426	5.99695	7.14416	6.47435
hSQ002685	5984	7.05364	6.89937	6.76309	7.05079	7.1865
hSQ002687	27005	2.96541	3.80654	2.8118	3.66062	3.20498
hSQ002690	5925	6.93331	8.41506	7.68713	8.38823	7.2887
hSQ002694	64965	8.49189	9.18567	8.31994	8.64664	7.44898
hSQ002695	26128	7.49576	7.06709	9.38357	8.85905	7.45253
hSQ002697	23463	3.30091	3.49608	3.76262	3.86205	3.13766
hSQ002698	4134	6.37387	9.55122	9.09571	9.24128	7.45807
hSQ002699	51759	4.5819	4.5916	5.10562	5.32274	5.41187
hSQ002702	10645	4.01109	4.4038	4.43332	4.57449	4.19517
hSQ002703	2954	5.55962	6.4217	5.34102	5.93439	5.46364
hSQ002704	1857	4.59687	5.34784	4.83842	5.1269	4.42779
hSQ002705	5162	8.84952	8.28815	9.49891	8.6917	7.62331
hSQ002706	441804	3.61404	3.8602	3.58529	4.51318	3.64973
hSQ002709	89782	4.12851	4.18567	5.11161	4.40101	3.93416
hSQ002711	80031	4.38744	5.56407	5.16004	5.36044	4.77835
hSQ002717	22938	9.94632	9.99579	9.6133	9.66145	8.37904
hSQ002718	2512	4.43198	4.86885	4.25148	5.25574	4.6259
hSQ002719	81533	4.78651	4.69728	5.94479	5.44359	4.90526
hSQ002721	10090	3.41042	4.01371	3.55017	3.8359	3.77089
hSQ002724	84661	4.36456	4.49003	4.27628	4.37014	4.48591
hSQ002725	400010	4.84466	5.63263	4.73389	5.41251	4.90725
hSQ002727	2273	5.60065	5.95449	7.18274	6.41505	6.16334
hSQ002729	5165	4.73804	6.48019	5.0475	5.78534	5.7011
hSQ002733	2060	5.01404	5.16031	4.84669	4.81899	4.48057
hSQ002743	51657	5.3196	5.83906	4.67964	5.44152	5.57548
hSQ002745	121457	5.74331	6.84342	5.84388	6.30258	5.7702
hSQ002748	9440	6.08118	6.79844	6.72087	7.52373	6.35312
hSQ002749	324	5.91758	6.16254	6.34672	7.1766	5.96768
hSQ002750	6059	9.80232	9.50003	10.4604	10.1463	8.84604
hSQ002752	29980	4.93647	5.30736	5.67532	5.64774	5.00369
hSQ002755	4076	9.93051	9.44631	10.5644	9.83804	9.68628
hSQ002756	5089	6.85128	8.10673	8.88314	5.29699	3.57761
hSQ002758	23389	4.4548	3.81935	5.41376	4.61617	4.58663
hSQ002761	55110	4.43949	4.85415	4.6053	4.30292	4.50723
hSQ002762	1666	6.82476	6.46184	5.56657	6.51912	6.62188
hSQ002764	26057	6.12327	6.2597	7.32395	7.62385	5.96338
hSQ002766	23015	2.60599	4.07817	3.68316	3.8211	2.92443
hSQ002767	8453	7.70456	7.68015	8.96742	8.6183	7.93144
hSQ002769	4697	5.471	4.94862	5.83842	5.31807	6.08765
hSQ002774	7458	9.55922	8.14446	11.8308	9.87844	7.26665
hSQ002775	375056::348477	4.85226	6.14405	4.40378	6.85525	5.56513
hSQ002776	9425	5.07403	5.72086	5.32732	5.56846	5.42622
hSQ002777	221035	1.81325	3.45954	3.32494	3.3091	3.3517
hSQ002781	60592	2.85511	3.08826	2.71088	3.12162	3.01207
hSQ002783	10302	3.58311	4.23495	3.20509	4.06668	3.09489
hSQ002786	55193	7.01542	7.81055	6.9789	7.67985	6.98684
hSQ002788	11124	6.31805	6.6471	6.61385	7.18911	7.189
hSQ002791	58488	3.13444	3.64653	3.35712	3.78653	3.77481
hSQ002796	8209	5.51747	5.92928	5.18601	5.95465	5.95037
hSQ002797	55556	4.56158	4.28439	4.56607	4.53938	4.91568
hSQ002798	54880	5.86538	7.60376	8.67959	8.56298	7.09682
hSQ002799	11124	6.30486	7.90528	6.31709	7.04869	7.29129
hSQ002801	79903	4.61998	5.13762	4.37179	4.91708	4.1719
hSQ002802	54987	5.25369	5.37518	4.60308	5.14001	5.21965
hSQ002805	442422	3.34035	4.28147	4.61976	4.70256	3.72337
hSQ002805	442422	3.70409	4.43353	4.65962	4.96119	4.27389
hSQ002807	23471	4.87026	4.26013	5.34661	5.13658	5.26417
hSQ002808	124997	5.06348	6.55158	4.93071	5.57512	4.99655
hSQ002810	54958	4.66684	4.79487	4.06822	5.3633	4.44763
hSQ002811	56937	4.15479	4.85204	4.61432	4.8271	4.0434
hSQ002812	10135	7.01007	7.28612	7.79073	7.21482	7.14147
hSQ002812	10135	7.10933	7.29214	7.71653	7.31372	7.10384
hSQ002813	79786	4.27479	4.28565	4.69136	4.58319	3.65287
hSQ002824	55761	5.22584	6.60346	4.73912	7.07462	5.24187
hSQ002826	6838	8.64325	8.50835	8.17466	8.42867	7.6766
hSQ002840	8882	4.89334	5.54484	4.40196	5.3911	5.25291
hSQ002846	6935	4.17526	4.93187	4.52654	5.32705	4.92082
hSQ002850	253665	4.17155	4.25292	4.20969	4.78461	4.34291
hSQ002852	51149	3.71709	4.68675	3.53501	4.86933	4.22336
hSQ002856	55813	8.48118	7.27754	8.43474	8.42835	8.80946
hSQ002858	81873	3.97036	4.49272	4.21727	4.51649	4.30011
hSQ002862	23185	6.20766	6.62824	6.52748	6.22784	5.81384
hSQ002863	1434	9.68233	11.0205	9.10771	10.5399	8.89695
hSQ002865	8226	4.70421	5.32078	5.04411	4.97147	4.3546
hSQ002868	989	7.38115	7.24039	7.36688	7.54829	6.63629
hSQ002871	1781	9.91682	10.2901	9.55388	10.3734	9.85024
hSQ002879	79692	4.97492	5.33537	4.9697	4.84478	5.08859
hSQ002887	284071	5.42136	6.63799	5.2721	6.62236	6.2598
hSQ002889	10548	6.41084	7.30892	7.04802	6.71276	6.9697
hSQ002890	repname(hSQ002890)	2.82019	3.72548	2.51965	3.98853	2.73916
hSQ002893	6389	9.20367	8.75149	8.61587	8.87763	7.91045
hSQ002894	9039	6.73338	6.54108	7.0924	7.00287	7.54791
hSQ002895	4137	8.53532	8.16625	7.87722	6.67716	6.76026
hSQ002902	9949::286505	6.1142	5.91893	6.66814	5.76745	5.09178
hSQ002911	130340	3.72963	3.99898	3.71583	4.56968	3.45541
hSQ002912	57606	3.57356	4.75124	4.80944	4.57464	4.22462
hSQ002921	9512	6.22716	6.12077	7.10333	7.72461	6.64518
hSQ002923	10038	5.70774	7.00021	6.21493	6.56527	6.36512
hSQ002924	79844	3.11971	3.54982	3.41489	3.59269	2.63237
hSQ002925	440141	5.11381	5.59367	5.3985	5.13566	5.29478
hSQ002926	2665	10.028	10.0748	9.94034	8.86982	9.42385
hSQ002927	55847	3.366	3.14079	4.1246	3.45621	3.69453
hSQ002934	10802	6.45023	5.76847	7.05576	7.43104	6.95394
hSQ002936	51202	7.61787	8.36638	6.62538	7.56972	6.87148
hSQ002939	1797	5.22782	6.44569	4.40355	5.68735	4.72655
hSQ002944	4285	8.85076	8.31152	9.13386	9.02711	8.95355
hSQ002946	10630	4.80822	5.02691	6.0334	5.59531	5.15974
hSQ002950	4299	5.26667	5.25157	6.35568	5.69484	4.83162
hSQ002952	80209	4.77743	4.79926	5.37883	4.69187	4.14099
hSQ002954	661	3.91689	5.6903	5.09322	5.6324	4.60901
hSQ002956	4627	7.86085	9.13244	7.73057	6.50571	6.22346
hSQ002960	10956	7.57191	8.94239	7.41824	7.7599	6.9906
hSQ002961	7551	5.37368	5.98705	5.35618	5.98363	5.5507
hSQ002962	64342	5.60529	6.80037	5.2383	6.45757	5.78625
hSQ002964	54936	5.54999	6.51832	5.25538	6.30094	6.15765
hSQ002965	8536	4.83623	5.4798	4.77745	5.70752	5.50831
hSQ002967	26802	2.72207	2.74598	2.32494	2.82458	2.38426
hSQ002968	8326	3.05436	4.31621	2.74557	4.13454	3.47681
hSQ002972	10617	4.72331	4.6083	4.94025	5.07721	4.838
hSQ002973	9697	4.73366	5.23192	5.72731	4.96863	4.27817
hSQ002975	158160	5.33818	7.39391	5.21683	6.40867	5.6259
hSQ002977	3075	1.85823	2.24407	2.23271	2.46288	2.3873
hSQ002982	204851	4.96519	4.23362	6.60866	5.52494	4.95238
hSQ002984	1774	3.21752	3.05761	3.00866	3.44504	3.05951
hSQ002988	440733	6.29677	6.4507	6.35234	6.52961	6.43875
hSQ002989	80127	2.59719	3.06978	2.39003	2.8409	2.63526
hSQ002991	5441	4.90754	5.0159	5.24953	5.55636	2.82583
hSQ002994	10979	7.99246	6.8508	8.61508	7.91601	7.53346
hSQ002996	51070	6.59888	6.90058	5.84831	6.99424	6.71281
hSQ003003	6810	5.30942	6.54443	5.20761	5.77643	5.23107
hSQ003007	10280	4.66187	5.38644	4.85065	5.5449	5.18285
hSQ003011	9101	4.73543	4.10851	5.77347	5.70401	5.02126
hSQ003013	54879	5.3236	6.00298	5.95933	6.2594	5.89057
hSQ003014	5387	3.55488	3.88807	3.25353	3.88822	3.70186
hSQ003015	6744	3.80703	3.75606	4.01537	3.76348	3.23776
hSQ003020	10295	4.61457	5.57874	4.72446	5.22151	4.6208
hSQ003024	65975	5.20505	5.87933	5.40693	6.07882	6.06028
hSQ003026	10626	3.76653	3.58411	3.84813	3.90182	3.55795
hSQ003027	10521	3.51226	3.51991	3.4571	4.81888	4.7487
hSQ003030	10240	9.02207	8.4172	8.37347	8.25644	8.42474
hSQ003032	57621	4.11031	4.06484	4.2419	4.18115	3.3924
hSQ003035	9168	5.29975	4.39668	5.33482	5.09764	5.09403
hSQ003037	84271	5.97219	7.03405	5.6383	6.9752	6.51753
hSQ003044	57212	2.70423	2.96124	3.06164	3.12252	2.31399
hSQ003050	444	3.80734	5.70141	4.34463	5.32349	5.20807
hSQ003052	57862	4.28428	5.15225	3.91813	4.47984	4.18297
hSQ003054	9349	2.14206	2.8593	1.94	2.59767	2.04406
hSQ003059	79027	3.31271	4.27559	3.40972	4.22418	3.95785
hSQ003060	55326	3.64003	4.09745	4.31891	3.93098	3.70949
hSQ003061	391126	7.04945	7.12067	6.80193	6.47717	6.5172
hSQ003063	5289	8.70441	10.4737	8.02825	8.57161	8.43956
hSQ003065	6675	5.82139	6.63403	6.44629	6.52925	5.59271
hSQ003066	51244	5.26492	6.2065	5.58966	5.36687	4.55373
hSQ003069	39	6.78915	7.91732	6.4915	7.60995	7.23022
hSQ003070	8678	3.77605	3.48203	4.22419	3.87817	3.47033
hSQ003071	5147	3.58116	4.15447	3.89194	4.44979	4.45608
hSQ003073	92906	6.27383	6.9832	7.05865	7.04064	6.53668
hSQ003074	29915	5.3619	6.63007	5.61953	6.32096	6.29784
hSQ003075	84289	4.17737	3.84105	4.84456	4.70678	4.19501
hSQ003077	60685	5.02794	5.12702	5.67131	5.28691	5.21454
hSQ003080	repname(hSQ003080)	15.4311	17.763	16.0424	19.4981	16.5663
hSQ003082	1677	4.73952	4.71718	5.47828	4.87326	4.21148
hSQ003084	8604	5.72187	5.85009	5.7303	6.51159	6.19106
hSQ003085	6432	11.3856	8.84321	12.4104	10.8765	9.90816
hSQ003086	repname(hSQ003086)	3.08184	4.69914	4.30111	4.151	3.71552
hSQ003088	5775	3.15159	4.07199	3.51368	3.75525	3.79892
hSQ003090	51642	6.39371	6.60709	6.20989	6.64641	6.97749
hSQ003091	22800	4.1828	5.29115	4.21329	4.97744	4.75546
hSQ003093	9150	7.37889	8.12819	7.02916	6.82597	6.98264
hSQ003095	83694	4.68966	5.33826	4.34841	5.08167	4.5322
hSQ003098	161436	5.13834	4.81139	6.43882	5.58996	5.24748
hSQ003099	55794	7.94041	8.68331	7.22858	8.20983	7.35139
hSQ003100	10643	6.60714	7.64855	5.95473	7.5865	7.19903
hSQ003102	116936	3.13375	4.20671	3.10818	3.80998	2.77784
hSQ003103	10713	6.50364	7.14383	6.70238	6.85722	6.76013
hSQ003104	2581	4.67069	5.67618	6.60054	5.25699	5.8856
hSQ003105	23598	7.09746	7.57769	7.55094	6.90963	6.07253
hSQ003106	993	10.8249	9.20771	11.9644	11.7344	12.0913
hSQ003107	23033	4.01209	4.67534	4.15939	4.60515	4.12229
hSQ003112	54882	5.743	7.20797	7.23587	8.12839	6.993
hSQ003114	128061	5.57566	5.18175	6.01745	6.12604	5.49498
hSQ003118	55227	4.48564	5.09839	5.98273	3.39304	3.96576
hSQ003119	5612	4.44926	5.21947	4.76181	5.21665	5.13068
hSQ003120	440917	6.97832	7.29225	7.32651	7.56963	6.65709
hSQ003122	24138	6.56836	7.20359	6.46519	6.8735	6.42107
hSQ003124	103910	5.94094	6.21123	5.39464	5.43456	5.98882
hSQ003125	26130	7.92285	7.96666	8.60372	8.39466	7.85628
hSQ003129	repname(hSQ003129)	2.0057	2.59341	1.78086	2.33447	1.81404
hSQ003130	7328	4.99165	5.5924	5.68439	5.81173	5.45644
hSQ003132	9655	3.89897	4.84694	4.0136	4.8989	4.31028
hSQ003133	144983	6.95992	7.27635	6.6634	6.71198	6.64189
hSQ003137	84693	3.4012	3.71243	3.36816	3.97009	3.68069
hSQ003139	7812	6.89106	5.74154	7.31083	6.23663	5.56083
hSQ003140	9709	5.36168	5.89606	6.48318	6.21916	5.66144
hSQ003141	10018	3.06643	4.18062	3.21007	3.44243	2.94157
hSQ003147	1459	5.16853	7.08315	6.67123	7.88737	6.58799
hSQ003148	56655	3.36294	3.4243	3.8221	4.00937	3.69788
hSQ003149	221150	5.25446	6.78171	5.21173	5.95528	4.9816
hSQ003150	22900	3.85252	4.66223	4.26246	4.43462	4.30479
hSQ003151	10056	6.65119	6.10781	5.65377	7.55138	6.66243
hSQ003155	23080	4.98068	5.1025	6.1796	5.9172	5.68436
hSQ003156	57552	6.10431	7.33864	6.50317	6.66611	6.33699
hSQ003158	9868	10.1919	10.071	10.1262	9.81965	9.67582
hSQ003159	repname(hSQ003159)	7.09016	6.86095	7.95556	8.00333	7.42638
hSQ003159	repname(hSQ003159)	7.21166	7.03182	8.13457	8.38366	7.54284
hSQ003159	repname(hSQ003159)	6.8174	7.11129	7.82816	8.04488	5.50119
hSQ003159	repname(hSQ003159)	7.30289	7.10272	8.32193	8.56178	7.92988
hSQ003159	repname(hSQ003159)	7.3058	7.1571	8.63966	8.75028	5.83726
hSQ003159	repname(hSQ003159)	7.23935	7.11225	8.04604	8.49057	7.83959
hSQ003159	repname(hSQ003159)	7.36273	7.13465	8.58596	8.55231	8.00055
hSQ003159	repname(hSQ003159)	7.49253	7.17469	8.39594	8.68773	8.07485
hSQ003159	repname(hSQ003159)	7.39774	7.18228	8.42539	8.88233	8.14495
hSQ003159	repname(hSQ003159)	7.43007	7.08276	8.30727	8.67382	7.99916
hSQ003159	repname(hSQ003159)	6.75141	7.15836	8.47759	8.95899	6.10297
hSQ003159	repname(hSQ003159)	7.13218	6.2685	8.25894	8.55213	7.48415
hSQ003159	repname(hSQ003159)	7.38301	7.08402	8.3807	8.75884	8.00017
hSQ003159	repname(hSQ003159)	7.15789	7.21874	8.56293	8.90591	6.11548
hSQ003159	repname(hSQ003159)	7.37485	7.0992	8.42771	8.79058	6.02273
hSQ003159	repname(hSQ003159)	7.18786	5.95413	8.40194	8.36019	7.7682
hSQ003159	repname(hSQ003159)	7.29656	6.44331	8.53073	8.53978	7.88798
hSQ003159	repname(hSQ003159)	7.35771	6.50953	8.42761	8.80076	6.07283
hSQ003159	repname(hSQ003159)	7.38815	6.74107	8.42282	8.72726	5.97539
hSQ003159	repname(hSQ003159)	7.47986	6.02427	8.24356	8.67718	7.59419
hSQ003159	repname(hSQ003159)	7.4269	7.09158	8.35126	8.83268	6.7978
hSQ003159	repname(hSQ003159)	7.48235	7.10769	8.39445	8.24746	6.89163
hSQ003159	repname(hSQ003159)	7.23784	5.82526	8.02057	8.08017	6.41345
hSQ003159	repname(hSQ003159)	7.44466	6.38638	8.37589	8.76645	6.30985
hSQ003159	repname(hSQ003159)	7.51654	7.1644	7.84489	8.71655	6.05327
hSQ003159	repname(hSQ003159)	7.48907	7.17413	8.33284	8.66346	6.20768
hSQ003159	repname(hSQ003159)	7.41006	7.22981	8.11965	8.95568	7.57282
hSQ003159	repname(hSQ003159)	7.44655	7.22	8.14404	8.93513	6.09479
hSQ003159	repname(hSQ003159)	7.14418	7.13389	8.15775	8.72416	7.66321
hSQ003159	repname(hSQ003159)	7.28586	5.90851	7.90118	7.88544	7.64639
hSQ003159	repname(hSQ003159)	7.36612	7.20278	7.9482	8.80542	7.28563
hSQ003159	repname(hSQ003159)	7.30252	7.2944	8.17446	8.72929	6.08236
hSQ003164	7381	5.06411	4.24653	5.46027	4.73905	3.84765
hSQ003167	567	5.76112	4.86276	5.34657	5.4426	6.17209
hSQ003171	64326	5.13604	6.05046	4.74908	5.61791	5.82798
hSQ003173	51326	4.70172	5.47814	4.40108	4.62088	4.7484
hSQ003180	10950	5.13601	6.18431	5.2012	5.2237	5.44489
hSQ003183	2534	5.357	5.48282	4.97532	5.28351	4.96259
hSQ003185	5886	4.18618	4.60319	4.21081	4.92997	4.41151
hSQ003188	80273	6.80458	7.03592	7.18779	7.13625	7.79342
hSQ003199	57489	4.63114	4.32571	5.21333	5.47001	5.09037
hSQ003203	79053	8.06293	8.44245	7.69841	7.84523	7.97973
hSQ003204	25791	5.25649	6.31839	5.49316	6.06195	5.82083
hSQ003205	1855	3.45538	4.27435	3.3246	4.28742	3.48399
hSQ003206	79643	4.1881	4.9935	3.98684	5.07266	4.20201
hSQ003208	337876	7.57137	8.63051	7.25121	7.39149	6.98204
hSQ003212	7203	11.4384	11.6812	11.2853	12.0955	11.9319
hSQ003213	346887	3.16618	3.91168	2.90208	3.56703	3.14902
hSQ003216	3843	7.72677	9.02242	7.5808	8.69255	8.07473
hSQ003220	63035	6.16246	7.38494	6.93203	7.84716	6.31901
hSQ003221	5763	4.69732	5.40379	4.70288	5.56185	5.32587
hSQ003222	54882	6.11187	6.13803	5.40396	6.78701	5.1778
hSQ003223	3295	9.65066	8.2189	10.3239	10.1096	9.36507
hSQ003224	9077	7.69064	9.99547	8.5679	7.65292	7.10927
hSQ003228	52	3.81942	4.16501	3.57535	4.28199	4.23318
hSQ003231	79828	5.02434	5.21806	4.79378	5.59891	5.09508
hSQ003234	5110	7.18891	6.25619	7.97547	6.33097	6.95008
hSQ003236	23300	2.6645	3.15674	2.52697	3.03086	2.61837
hSQ003237	10224	4.3704	5.66711	4.55022	5.26594	5.21853
hSQ003244	5300	5.17759	5.66348	5.60364	6.28563	5.85009
hSQ003245	23029	6.36024	5.95017	5.23469	6.25836	5.7585
hSQ003246	9813	3.01013	3.26053	3.33016	3.23618	2.85689
hSQ003249	148534	2.90273	3.40191	3.67582	4.02726	3.86508
hSQ003250	143098	5.08232	6.61048	5.89423	6.30349	6.41855
hSQ003252	7178	2.58974	3.10708	2.46302	3.138	2.67611
hSQ003253	5216	5.838	5.41408	6.09878	5.84763	6.48172
hSQ003254	9169	7.4916	6.88549	7.09393	8.0892	7.09275
hSQ003259	3688	6.78269	7.52918	6.56605	5.55861	5.21646
hSQ003260	1938	6.23685	8.95907	5.79641	8.59082	6.04998
hSQ003261	9054	5.5462	5.71493	6.20228	6.11169	5.29317
hSQ003261	9054	5.35302	4.94787	6.00131	5.78817	5.36683
hSQ003265	5394	7.26985	8.43408	7.47448	8.09862	6.74754
hSQ003271	9124	7.44036	7.184	7.96755	7.17282	7.61831
hSQ003272	5037	9.38925	8.69521	10.7579	8.94797	9.31926
hSQ003273	28982	5.87366	7.17466	6.41946	6.63049	6.01169
hSQ003274	11120	5.08694	5.91471	4.89654	5.30906	4.74641
hSQ003276	257218	5.75525	5.0828	6.70065	7.47633	6.08545
hSQ003278	148479	6.4516	7.54212	6.50275	6.56261	6.33137
hSQ003281	1452	6.03817	5.17116	5.6566	6.0912	6.33153
hSQ003284	23201	4.71834	5.24177	5.45788	5.52397	4.58064
hSQ003285	5411	5.24363	6.51737	6.23104	7.35354	5.617
hSQ003286	440248::400322	2.55268	2.45057	2.39406	2.81166	2.16123
hSQ003289	4267	4.37124	4.77624	5.66562	5.61162	4.50129
hSQ003291	57038	4.33432	4.52041	3.45511	4.81991	4.21798
hSQ003292	9603	6.12506	8.19449	7.30653	7.21021	6.74802
hSQ003295	7019	6.23724	5.27025	7.16969	5.93343	6.05961
hSQ003296	79979	2.85817	6.92398	7.96687	4.66114	3.69997
hSQ003297	11065	7.68352	6.97761	5.68277	7.5784	6.31554
hSQ003299	126626	3.5619	4.98354	5.41408	4.01193	3.462
hSQ003301	84224	3.86729	3.49012	4.32185	3.98119	3.45788
hSQ003302	50650	6.42036	7.23223	6.6253	6.97198	6.86888
hSQ003305	253725	6.78776	7.41021	6.71635	7.00827	6.66944
hSQ003306	55747	6.72574	7.63463	6.56786	7.04408	6.65484
hSQ003307	84516	4.28797	4.84739	4.04659	4.76042	4.01975
hSQ003308	5681	2.39722	2.88951	2.30942	2.88528	2.38718
hSQ003309	285605	3.89621	4.10341	4.59631	4.37278	3.94462
hSQ003312	6945	2.59616	4.35338	3.94074	4.03882	2.86198
hSQ003314	7259	11.2195	9.37923	12.1601	11.0669	11.9571
hSQ003315	2589	4.1387	4.83212	4.47268	4.88288	4.98244
hSQ003317	5283	2.88703	3.66268	3.46465	3.8116	3.33472
hSQ003318	6144	5.46224	4.56869	5.54883	5.3514	5.27809
hSQ003320	388389	5.49801	6.65504	4.78581	5.79325	6.3375
hSQ003326	8491	4.7005	4.8973	5.73022	5.86144	5.47431
hSQ003327	1787	3.87136	5.02915	4.70562	4.92635	5.09886
hSQ003328	9919	7.14166	7.11966	7.85569	7.74135	6.71652
hSQ003329	2534	4.56446	4.51576	4.07413	4.36645	4.27675
hSQ003331	2079	5.3957	5.68974	5.20385	5.25438	5.54706
hSQ003332	22873	2.58207	3.36234	2.69391	3.4471	2.80455
hSQ003334	112616	3.72723	4.29794	4.17969	4.64105	4.30656
hSQ003335	149076	3.79465	4.87482	3.98132	4.28149	4.31706
hSQ003345	25927	3.34485	3.76056	3.19979	3.55212	3.56855
hSQ003348	1967	5.57093	6.22845	5.99539	6.09938	5.08553
hSQ003350	9693	5.93469	5.34414	6.28218	6.73226	6.72837
hSQ003356	1723	4.82487	5.88451	4.79276	5.18213	5.04332
hSQ003357	8243	5.50654	10.4497	9.35364	9.4855	7.31418
hSQ003359	9266	5.13387	5.95172	4.79197	5.79038	4.95816
hSQ003360	389562	2.32909	3.68397	2.55004	3.24891	2.87518
hSQ003361	8559	6.35609	6.24307	7.11066	6.56215	6.32333
hSQ003372	3831	8.31008	8.97841	7.7735	8.28522	8.5621
hSQ003375	3692	7.87214	7.68078	7.6225	8.44733	8.26157
hSQ003379	8673	4.7337	4.19349	4.21034	4.91176	4.59233
hSQ003381	80822	3.96168	5.08839	5.11477	4.92802	4.76617
hSQ003383	10535	7.12315	7.30516	6.46688	7.87417	6.5687
hSQ003389	91283	2.62842	3.32562	2.61006	3.40796	3.14557
hSQ003390	57479	5.7776	7.19011	5.73465	7.10733	6.2875
hSQ003395	440396	5.62516	7.26641	6.34161	5.89641	5.85916
hSQ003396	388545	4.1023	5.87924	5.03089	5.31722	4.81772
hSQ003397	284988	2.33912	3.05695	2.521	2.93875	2.74069
hSQ003399	8664	9.79636	8.50519	9.39449	10.1949	8.35635
hSQ003400	repname(hSQ003400)	4.92933	4.99299	4.62738	5.44073	4.96384
hSQ003403	1613	7.18343	8.02375	6.32509	8.30763	7.61526
hSQ003409	6888	7.94745	7.68937	8.11295	8.07595	6.96441
hSQ003417	144455	6.00169	6.6691	7.02724	6.50756	6.71745
hSQ003418	64175	6.76915	7.61782	6.78416	7.95956	6.68445
hSQ003421	6120	3.99808	3.5916	5.43392	4.66812	4.4304
hSQ003421	6120	4.00253	3.58759	5.28944	4.68214	4.21784
hSQ003423	3337	5.6787	6.81963	5.16179	6.60904	5.78407
hSQ003430	10609	5.35219	5.66477	4.70572	6.39975	6.05454
hSQ003434	1	2.43411	3.07426	2.33881	3.222	2.95705
hSQ003438	5813	5.66558	6.6627	5.4169	6.79068	5.72486
hSQ003440	55341	4.70681	6.76576	7.58467	7.77543	6.70176
hSQ003442	55132	5.54175	7.30447	4.95465	6.38358	6.48364
hSQ003447	6629	7.72837	7.72071	7.24531	6.95736	7.90618
hSQ003448	55031	6.30197	7.79957	7.10119	6.78118	6.02408
hSQ003450	51111	4.84867	5.80747	5.41122	6.59741	5.21025
hSQ003454	79609	2.92362	2.90733	2.84193	3.23072	2.80033
hSQ003455	158563::1184	5.74758	7.20722	5.96877	7.31613	5.84813
hSQ003457	57555	4.41449	4.62106	4.73906	5.2203	4.67432
hSQ003458	79929	2.73348	3.54039	3.08218	3.43767	3.4037
hSQ003459	6118	6.55718	7.70929	6.73056	7.16149	6.88666
hSQ003460	9929	4.12392	3.9216	4.36265	4.24454	4.28465
hSQ003472	440469	3.16061	3.69672	3.28426	3.76318	3.07327
hSQ003477	54841	3.9939	4.08548	4.08391	4.00095	4.02219
hSQ003481	164022	10.6609	10.2133	11.9715	11.4701	7.28623
hSQ003483	63926	5.35809	6.01309	6.17069	6.18621	5.82906
hSQ003485	8994	5.08938	5.81273	5.44918	5.72305	4.95211
hSQ003490	55379	9.42267	9.62578	10.9424	10.4929	11.0739
hSQ003493	51319	4.78108	4.11621	5.61484	5.12341	4.58352
hSQ003502	211	7.53519	7.5689	7.44322	7.43886	6.92544
hSQ003505	27335	7.20607	6.65039	7.47434	7.73151	6.09417
hSQ003512	7126	4.53588	5.36712	5.08717	5.21646	5.24683
hSQ003517	26071	3.4746	3.87676	3.76021	3.99786	3.7864
hSQ003526	79670	5.16771	5.86241	5.80571	5.7219	5.39183
hSQ003530	9650	4.33071	4.19385	4.18013	3.95383	4.62256
hSQ003532	949	5.22535	6.53101	6.34609	5.45179	5.87932
hSQ003533	1207	7.5325	7.48083	7.96553	7.59364	6.44831
hSQ003534	2048	6.04745	7.16842	6.0272	6.61769	6.28297
hSQ003535	10171	6.81948	8.06302	7.0055	7.59904	7.5879
hSQ003536	7584	3.93585	5.55945	3.98354	4.11707	4.34942
hSQ003538	23503	4.90403	5.39231	4.59104	5.29496	4.74639
hSQ003539	3673	6.61012	8.15933	6.20053	8.51836	7.38774
hSQ003540	repname(hSQ003540)	3.99139	4.51949	4.58526	4.47027	3.88366
hSQ003541	5833	4.33549	6.19739	3.82932	5.60872	5.25971
hSQ003544	147841	4.06876	4.78998	4.15522	5.26329	4.61269
hSQ003549	56252	6.49499	7.2429	6.78592	7.06304	5.96942
hSQ003554	8220	6.0859	7.14103	5.52108	7.31755	6.87946
hSQ003556	23135	5.11279	5.71724	5.58594	5.39389	5.18163
hSQ003558	286148	3.22326	3.80452	3.44678	4.15579	3.53618
hSQ003559	10903	2.28973	4.12486	2.58431	3.46565	3.25502
hSQ003561	27341	5.88582	6.48027	5.46253	7.01431	6.85264
hSQ003562	123	6.71881	7.14566	6.9163	7.55881	6.8108
hSQ003563	392164	4.79378	6.34276	4.62243	5.82067	5.33259
hSQ003567	3216	2.87415	3.44484	3.27076	3.53048	2.89865
hSQ003568	283970	2.9798	4.04062	2.86386	3.60712	2.63913
hSQ003570	55152	5.02244	6.36608	5.01079	6.5176	5.14769
hSQ003573	6427	9.84008	9.22336	10.2799	9.91374	10.0802
hSQ003574	9638	2.93863	4.91355	3.51106	4.1907	4.3636
hSQ003582	81554	5.05607	5.43053	4.36468	5.57012	4.83715
hSQ003586	975	7.29059	8.15857	8.46588	8.82954	8.66065
hSQ003587	8892	7.36053	8.13547	7.04399	7.30384	7.02866
hSQ003591	131870	3.44678	4.92058	3.97097	4.51021	3.94694
hSQ003594	117177	3.19765	3.81467	3.94918	3.93342	3.95325
hSQ003595	7284	7.82347	7.83933	6.92832	8.16927	7.5765
hSQ003597	5925	5.09676	6.06812	5.547	6.10453	6.07774
hSQ003601	10940	7.11557	8.49152	6.87957	7.71211	7.02383
hSQ003603	repname(hSQ003603)	3.86734	5.20956	4.7531	5.4398	5.47385
hSQ003608	8669	5.25356	4.46674	5.82478	5.00613	4.80176
hSQ003611	85365	4.55075	5.32799	4.72182	5.1144	4.29467
hSQ003619	148362	4.33498	6.09352	5.03669	5.28238	5.32913
hSQ003620	5488::344797	3.85734	4.85938	4.31329	5.00254	3.90764
hSQ003623	1739	4.68095	6.19798	4.57273	6.1031	5.21786
hSQ003628	391169	3.87176	5.70169	4.41804	4.75954	4.64873
hSQ003630	80829	4.6032	4.86144	4.34854	5.1093	4.45454
hSQ003631	125476	5.76987	6.33381	5.71847	5.64077	4.97304
hSQ003632	1111	6.28713	6.97494	5.84723	6.59657	6.2617
hSQ003633	90024	4.44603	6.04835	4.71158	5.3456	4.98732
hSQ003634	5516	4.79221	5.4895	4.95335	5.43554	4.62997
hSQ003636	1629	4.71052	4.70091	5.46933	5.85007	4.95566
hSQ003639	221079	3.10782	4.62957	4.72408	4.42594	4.32216
hSQ003640	689	9.56645	9.11032	10.6976	8.88992	9.79177
hSQ003641	7270	7.37531	7.51127	6.59463	7.21829	6.03356
hSQ003652	2869	3.80025	4.89074	4.00052	4.11708	4.08523
hSQ003656	10498	6.50416	7.85268	6.83701	8.42245	6.22017
hSQ003657	488	7.28888	7.83905	7.80237	7.36324	6.60654
hSQ003659	51259	3.28926	3.93784	3.02409	3.5741	3.29143
hSQ003665	4281	7.5601	7.52215	8.22356	8.19569	6.65278
hSQ003666	85004	3.40183	5.28229	4.18726	4.28916	4.50912
hSQ003670	170960	4.3306	5.66889	5.12239	6.61242	5.10802
hSQ003671	4571	3.13186	3.76012	2.96822	3.44477	2.94817
hSQ003678	9043	7.53804	9.5539	7.27096	8.77832	8.01776
hSQ003685	4998	7.04822	7.3082	6.81952	7.80735	6.4923
hSQ003686	26297	3.81919	5.00335	3.27176	4.318	4.17817
hSQ003687	9352	7.45512	7.85998	8.20751	8.01974	8.60351
hSQ003689	23052	5.17849	5.62411	5.82079	5.36206	5.32176
hSQ003708	51100	5.51941	6.84049	5.1501	6.37669	6.28003
hSQ003713	93627	4.62246	6.90337	5.02248	6.17503	5.08926
hSQ003715	9325	7.6151	8.40733	7.58959	7.91743	7.80932
hSQ003717	51134	3.60324	4.50799	3.49142	4.29583	3.65957
hSQ003722	4835	4.12583	5.19119	5.09294	5.79597	5.48316
hSQ003728	5116	5.46359	5.8872	5.76341	6.00258	4.99269
hSQ003731	103910	8.02626	5.89064	8.14568	7.23291	6.75822
hSQ003732	56954	5.21853	6.16966	4.63691	5.46765	5.51774
hSQ003734	23307	6.19089	7.07305	6.17804	7.22946	6.456
hSQ003737	52	3.841	4.10418	3.81653	4.3324	3.75273
hSQ003743	60488	6.86615	6.60205	7.46571	7.44424	7.722
hSQ003744	23286	4.45574	5.27219	4.70347	5.06741	4.97126
hSQ003752	126129	3.07751	4.11422	2.94054	3.54502	3.19792
hSQ003753	9588	8.31894	7.02682	8.90021	7.22581	5.85194
hSQ003754	4134	7.36472	9.96675	8.75046	9.3341	8.82926
hSQ003757	9100	7.02193	6.21739	7.13797	6.55246	6.5962
hSQ003758	55506	6.81366	7.54072	6.14695	6.81416	6.89783
hSQ003759	9135	3.31973	4.13754	3.49236	4.10899	3.4205
hSQ003760	1676	4.28348	5.32602	4.29148	5.13832	4.6539
hSQ003765	125988	3.98428	4.40368	3.96401	4.76919	4.57355
hSQ003766	55958	8.44471	8.86085	8.93565	8.93326	7.61899
hSQ003769	10785	4.8578	5.85761	4.50476	5.82338	5.10329
hSQ003770	5033	7.03733	8.16957	6.55325	7.13474	6.62163
hSQ003782	197407	5.17132	7.20303	4.5922	6.28582	6.04109
hSQ003783	3206	4.96066	5.41602	4.87529	5.67557	5.11616
hSQ003784	23399	3.46054	4.43143	3.49967	4.06162	3.84478
hSQ003787	1459	6.3963	7.16511	7.18364	7.47606	6.19838
hSQ003788	55787	6.12152	6.93698	5.94985	6.70682	6.49035
hSQ003790	865	4.16739	4.42333	5.38401	4.95169	4.7576
hSQ003792	6449	5.50541	6.27555	5.97993	6.41907	6.06696
hSQ003795	84501	3.26861	4.27692	2.87361	4.08997	3.29962
hSQ003801	23325	4.69499	5.35951	4.94628	6.06039	5.7067
hSQ003806	2889	3.85675	4.33747	3.54441	4.4378	3.59579
hSQ003812	5351	7.36122	7.27289	6.62178	7.48885	6.91889
hSQ003819	83548	4.85055	5.10378	5.28584	5.24522	5.19366
hSQ003821	23366	4.44166	4.15006	5.3357	4.9895	4.40635
hSQ003823	7257	7.72559	7.1761	7.76114	7.66643	7.24137
hSQ003826	8476	4.77778	6.82343	6.67025	6.48076	5.66941
hSQ003830	5579	4.67381	7.13929	6.32009	5.4258	5.64829
hSQ003831	3251	5.13039	5.82137	6.03557	5.15821	5.68305
hSQ003842	63875	4.85662	5.39721	4.70377	5.60628	5.67204
hSQ003849	144097	3.97715	5.29518	3.8198	4.98043	4.31252
hSQ003850	5094	7.14528	7.30796	7.45375	7.01132	6.7202
hSQ003851	390773	3.64425	4.48013	3.73779	4.42774	3.86778
hSQ003858	11315	6.33221	7.18715	7.02019	6.95325	7.07523
hSQ003860	148423	3.28862	3.91911	3.29431	3.94913	3.20574
hSQ003863	7756	8.34637	7.40932	7.91956	8.24317	7.29711
hSQ003869	25852	4.61328	6.19073	5.0254	5.89933	5.14855
hSQ003870	27292	4.68118	5.62269	5.6124	5.58268	5.03483
hSQ003875	51765	8.12428	7.78188	7.63051	7.98576	7.91625
hSQ003877	repname(hSQ003877)	2.34271	3.67523	2.96718	3.42566	3.07848
hSQ003878	55871	2.64516	2.40292	2.80546	3.05348	2.95681
hSQ003881	5872	5.87514	6.2688	5.88355	6.33325	5.32901
hSQ003882	23463	3.70436	3.78638	4.11282	4.18611	4.14518
hSQ003885	908	10.1173	9.75886	10.0423	10.4303	8.25817
hSQ003887	55239	7.37815	8.21256	7.54157	8.04686	7.00807
hSQ003893	51248	5.33547	5.17376	4.72769	5.26396	4.45863
hSQ003895	149603	5.89141	6.75316	6.33336	6.61098	6.95516
hSQ003897	154467	2.98562	3.4303	2.71161	3.51539	3.35274
hSQ003898	25852	5.02577	5.23726	5.53068	5.70923	5.18163
hSQ003900	23595	6.87928	7.68111	6.69275	7.86611	6.36264
hSQ003901	64430	4.2986	4.13838	4.89121	4.52839	4.26952
hSQ003903	54940	5.98669	5.63253	5.77934	6.14282	6.45029
hSQ003907	84317	3.99173	4.07821	3.9328	4.30287	3.81527
hSQ003910	4799	5.23788	5.71102	5.03702	5.87568	4.65693
hSQ003913	84888	5.24951	5.92888	6.02201	5.96339	5.79248
hSQ003919	84826	4.63536	5.40715	4.37409	4.16781	3.6801
hSQ003920	2509	4.071	4.08828	3.89249	4.4818	3.04228
hSQ003921	8331	3.81122	4.57461	3.59959	4.62181	4.00527
hSQ003924	23181	3.65551	6.06529	4.10691	5.52257	5.3104
hSQ003925	55854	6.82063	7.73256	7.20483	7.616	6.74495
hSQ003930	5878	5.60019	8.39499	5.87922	7.30102	5.62965
hSQ003932	9466	5.47888	6.68392	5.11173	6.53159	5.81277
hSQ003933	392352	6.84493	5.94155	6.77815	6.59335	6.86465
hSQ003935	repname(hSQ003935)	2.50509	2.35493	2.31865	2.71232	2.46215
hSQ003935	repname(hSQ003935)	2.62985	2.37296	2.42351	2.7517	2.44806
hSQ003935	repname(hSQ003935)	2.65586	2.06869	2.33557	2.70681	2.06734
hSQ003935	repname(hSQ003935)	2.61343	2.46527	2.4158	2.84495	2.47276
hSQ003935	repname(hSQ003935)	2.56627	2.33709	2.32271	2.77498	2.54779
hSQ003940	4849	6.58906	7.39194	6.73244	6.88307	6.45854
hSQ003951	10190	7.03807	6.79363	7.17015	7.2337	6.80181
hSQ003953	220213	4.38181	5.54824	4.56958	5.7569	4.8486
hSQ003956	1154	3.99495	4.52697	4.83734	4.96414	4.50891
hSQ003957	10521	8.05284	7.87166	8.89836	9.07377	8.38368
hSQ003959	79073	8.73753	8.31632	10.0304	6.78446	6.96446
hSQ003961	6574	6.1257	5.40628	6.65248	6.14759	5.80414
hSQ003969	7249	6.21965	7.99399	6.33362	7.04994	6.47627
hSQ003970	29781	5.17124	5.73941	4.68108	5.71837	5.56222
hSQ003974	373863	3.39247	4.35329	3.30424	4.47986	3.8046
hSQ003982	9638	3.13682	4.65411	3.52041	4.29567	4.39961
hSQ003984	51603	7.338	8.05784	7.05911	7.35756	7.64691
hSQ003986	26577	4.37981	5.66776	4.3194	5.17132	5.30227
hSQ003990	90390	3.02051	3.34614	3.95916	3.87698	4.14863
hSQ003991	9497	5.17678	4.67581	5.54028	6.41808	5.3618
hSQ003994	2519	3.99244	4.70052	4.05611	4.62233	4.47411
hSQ003995	51136	3.07177	2.91641	3.61844	3.81794	3.3965
hSQ003996	96459	4.63802	5.35333	5.51622	5.76127	5.33413
hSQ003998	140826	6.91878	5.82978	7.03255	6.55774	5.5687
hSQ003999	83640	6.49343	6.24259	6.07337	5.67591	6.58806
hSQ004000	23567	4.18089	4.6059	4.17294	5.26803	4.92682
hSQ004003	394	4.74435	5.13588	4.9814	5.67698	5.14421
hSQ004011	124512	4.24005	4.34881	4.09765	4.40503	4.39286
hSQ004012	25996	4.93497	6.11098	5.20136	5.79316	6.16841
hSQ004012	25996	4.63528	6.11164	5.18486	5.7879	6.17813
hSQ004015	488	8.18967	8.03382	9.25509	8.96946	8.46452
hSQ004019	3156	6.7264	9.16837	6.59891	8.57176	7.2375
hSQ004020	6634	8.01577	6.28382	7.83829	6.5752	7.71244
hSQ004021	125950	6.74069	7.69174	7.06123	6.9705	5.91051
hSQ004025	57580	4.58669	5.25997	5.12505	5.31641	4.85987
hSQ004026	401085	2.41743	4.2355	2.664	3.89721	3.5666
hSQ004032	5876	6.29179	5.47348	6.86636	6.33147	5.34261
hSQ004034	23530	7.46242	7.803	7.4121	7.48704	7.04744
hSQ004036	4052	8.15749	9.46162	8.43455	8.38943	8.02638
hSQ004039	150468	5.964	5.28392	7.35562	6.94549	5.0423
hSQ004041	57559	4.46737	5.50445	4.89813	5.06236	5.45779
hSQ004042	7112	7.59814	9.40453	9.44416	7.96411	6.97998
hSQ004043	3209	5.18857	5.40296	6.70414	5.45629	5.74617
hSQ004044	7469	6.90123	6.9483	6.72049	6.41127	6.22724
hSQ004048	9937	5.12557	4.08045	6.64451	5.80246	4.59746
hSQ004053	64755	4.60518	6.57901	4.41512	5.57465	4.96463
hSQ004056	5795	3.09565	4.74274	3.51777	4.02217	4.28956
hSQ004057	4747	5.51093	6.42007	4.98015	5.69497	5.73932
hSQ004058	2618	9.38103	10.0662	9.42572	10.0007	9.32372
hSQ004062	23552	4.70135	6.34276	4.291	5.78625	4.91198
hSQ004065	5106	7.28906	8.80395	6.36885	7.73907	7.13305
hSQ004068	10571	4.76346	4.79012	4.40956	5.21986	4.70627
hSQ004069	23193	7.94695	8.79505	7.40097	8.31701	7.7167
hSQ004070	57643	4.43	7.55878	5.75929	5.50914	5.09059
hSQ004073	254552	3.19278	4.51888	3.37526	4.45869	3.76171
hSQ004077	388650	3.87803	4.56148	3.492	4.3495	4.41821
hSQ004080	125988	4.05157	4.50787	3.94053	4.87344	3.81423
hSQ004083	79086	3.33103	3.57856	3.00817	3.31891	3.02718
hSQ004087	440976	3.66984	3.93948	3.31926	4.21908	3.67565
hSQ004090	8775	4.47595	5.41778	4.23465	5.03765	5.04729
hSQ004093	262	3.00541	3.80147	3.49094	3.70241	3.23758
hSQ004095	6748	7.14853	5.79254	7.86799	7.57632	5.25213
hSQ004099	10813	8.72159	8.96928	9.51471	9.85179	9.79817
hSQ004117	2664	5.30347	6.84158	5.62113	6.17484	5.971
hSQ004122	85007	3.32345	4.18897	3.31758	4.02062	3.18835
hSQ004123	55717	5.04751	5.35207	4.59348	5.49399	4.27837
hSQ004124	54849	4.77723	5.16371	4.82071	5.48907	4.28439
hSQ004125	6160	6.72786	6.44928	7.08343	7.08758	5.20027
hSQ004126	90060	5.53111	6.44139	5.83529	6.14811	5.70344
hSQ004128	654	5.70035	6.48408	5.31678	4.75185	5.25375
hSQ004130	79758	2.23415	3.42742	2.6932	3.46347	3.13865
hSQ004131	79660	4.1417	5.37694	5.46933	4.35386	4.20843
hSQ004133	55041	6.16497	6.24829	5.72278	6.81656	5.97375
hSQ004134	6294	8.40952	9.1135	8.67527	8.66926	8.14355
hSQ004137	118672	3.53389	4.12486	3.74759	4.51008	4.14176
hSQ004142	5771	4.47596	4.99357	4.88845	4.93044	4.63512
hSQ004144	5037	7.40597	6.58773	7.00735	6.8174	7.43833
hSQ004147	repname(hSQ004147)	2.95983	4.27303	3.31026	3.81955	3.07605
hSQ004148	25797	5.26552	6.52122	5.02112	6.44518	5.77323
hSQ004151	8027	6.56042	6.64415	5.50818	9.6975	7.68336
hSQ004153	64211	3.44513	4.0006	3.71886	3.31485	3.62021
hSQ004154	57018	3.3158	3.75807	3.18096	3.63895	2.89063
hSQ004159	4801	4.7248	5.79868	4.68277	5.20811	5.50982
hSQ004161	84304	4.04736	4.09371	3.65332	4.8878	4.16152
hSQ004168	80169	5.28469	7.33334	5.99695	6.6524	5.95883
hSQ004169	246330	4.38497	5.82713	4.39544	5.29187	4.96918
hSQ004174	3119	6.48244	8.00428	6.74611	7.40451	6.44781
hSQ004178	2597	12.3112	10.3048	12.5542	12.0966	11.8831
hSQ004178	2597	12.0032	10.0888	12.2506	12.3352	11.8186
hSQ004178	2597	11.5054	10.0888	11.5935	12.0235	8.29742
hSQ004178	2597	11.8205	10.1603	12.4625	12.6132	11.8945
hSQ004178	2597	12.2689	10.2852	12.5195	12.5987	13.3259
hSQ004178	2597	12.2659	11.7255	13.0756	12.8566	12.852
hSQ004178	2597	12.4555	10.2707	13.3335	13.1726	8.5504
hSQ004178	2597	12.3385	10.0809	12.4745	12.6027	12.2266
hSQ004178	2597	12.0948	10.0819	12.0924	12.2667	12.513
hSQ004178	2597	12.3389	10.5339	13.3749	9.59335	8.66889
hSQ004178	2597	12.4807	10.3264	13.399	13.3107	8.57517
hSQ004178	2597	12.5023	10.2541	12.8823	10.0949	13.1302
hSQ004178	2597	12.3564	10.286	13.0352	12.7887	13.5837
hSQ004178	2597	12.1562	10.2028	12.7515	12.7744	8.30776
hSQ004178	2597	12.3749	10.3686	13.0728	13.1214	8.41889
hSQ004178	2597	12.126	10.0742	12.467	12.4968	12.9776
hSQ004178	2597	12.2611	10.1988	13.0427	13.1103	13.1043
hSQ004178	2597	12.3753	9.76749	12.8352	13.0377	8.39288
hSQ004178	2597	12.6631	10.1883	13.0678	13.5002	8.31795
hSQ004178	2597	12.3363	9.74823	12.8264	12.5148	13.3725
hSQ004178	2597	12.2042	10.0583	12.9684	12.6864	12.7793
hSQ004178	2597	12.6227	9.74196	12.862	13.1198	8.18389
hSQ004178	2597	12.3759	8.78434	12.9743	12.834	8.18335
hSQ004178	2597	12.0609	7.95293	12.2696	12.4844	9.43014
hSQ004178	2597	12.4442	9.81812	12.9476	12.9319	12.4501
hSQ004178	2597	12.1363	9.76971	12.8091	12.7153	12.685
hSQ004178	2597	12.5492	7.75211	13.1035	12.4762	8.18931
hSQ004178	2597	9.33146	10.1029	13.1626	12.9908	8.15647
hSQ004178	2597	12.4224	9.87631	12.4003	13.1341	13.1435
hSQ004178	2597	12.141	9.50108	12.2897	12.612	12.5877
hSQ004178	2597	12.2543	10.0309	12.4729	12.482	8.05075
hSQ004178	2597	12.1499	10.1291	12.7174	12.7755	8.21075
hSQ004178	2597	12.1603	9.96765	12.2527	12.7664	12.123
hSQ004178	2597	12.0459	9.81842	12.163	12.5845	11.759
hSQ004178	2597	11.9779	10.0122	12.1764	12.2292	8.27128
hSQ004178	2597	12.1715	9.74146	12.4012	12.3572	8.21651
hSQ004178	2597	12.2497	10.0544	11.7783	12.5887	11.2628
hSQ004178	2597	12.3606	10.1798	12.711	12.9342	12.4893
hSQ004178	2597	12.0581	9.93761	12.1771	12.514	12.7747
hSQ004178	2597	12.0302	9.90196	12.0814	12.2184	10.6586
hSQ004178	2597	12.5067	10.1906	12.7861	12.9722	12.3607
hSQ004178	2597	11.8196	10.0903	11.9011	12.5306	8.49762
hSQ004178	2597	12.0889	10.1404	12.3334	13.1241	8.49596
hSQ004178	2597	11.9636	10.1228	12.4703	12.5131	12.108
hSQ004178	2597	12.2844	10.2377	12.5306	12.7202	13.2675
hSQ004178	2597	12.2487	10.3288	11.9294	12.852	8.5443
hSQ004178	2597	11.1492	9.92606	12.1674	12.1975	10.5883
hSQ004180	83543	3.92119	4.91101	4.20107	4.52887	3.77103
hSQ004181	repname(hSQ004181)	6.35145	7.37041	5.61278	8.22581	6.96534
hSQ004186	91445	5.49734	5.82831	5.60849	5.88604	5.51696
hSQ004189	991	8.10893	7.73841	7.76927	8.12164	8.2479
hSQ004190	55844	3.97431	5.16145	3.90803	4.48263	4.39954
hSQ004191	5516	4.08634	5.54571	4.00107	4.91545	4.77488
hSQ004193	54433	7.48778	7.29155	7.20063	5.96007	5.92486
hSQ004195	repname(hSQ004195)	2.81892	2.43014	2.38855	3.06979	2.54393
hSQ004196	54993	3.88132	4.47421	4.14044	4.81581	4.75246
hSQ004197	4735	7.51029	6.16563	7.55194	7.1156	7.93275
hSQ004198	79848	4.14164	5.68378	3.98671	5.41343	4.33594
hSQ004199	64419	3.71811	5.18516	3.49252	4.77674	4.50606
hSQ004204	10735	7.68689	6.30589	8.71664	8.336	7.88832
hSQ004207	51626	3.26108	4.48352	3.84265	3.94625	4.59349
hSQ004208	56624	3.30551	4.1882	2.9597	3.6485	3.18036
hSQ004210	2542	5.56843	6.36487	5.34338	6.11196	5.53187
hSQ004214	9993	4.98057	5.16365	4.93849	5.18856	5.11831
hSQ004215	7335::387522	3.13708	4.2276	3.54716	4.05534	3.75523
hSQ004219	57658	5.21922	7.00338	5.56392	6.19339	5.56658
hSQ004224	7556	4.20182	5.88693	4.83243	5.26004	5.13694
hSQ004225	387338	4.40018	5.30272	4.41291	4.9916	4.41448
hSQ004227	9184	7.10932	7.25512	7.97257	7.32215	8.20971
hSQ004229	373156	4.10727	5.45103	3.91534	4.62708	3.63875
hSQ004231	54623	8.80326	9.83449	8.91517	9.67127	9.97763
hSQ004233	282617	3.98154	3.70914	4.51507	4.52783	4.33672
hSQ004234	60488	6.25196	6.60662	5.65454	6.51336	5.81009
hSQ004237	11080	3.89096	3.9193	3.62267	3.88502	3.84937
hSQ004241	54805	4.86174	5.81415	4.86052	5.59918	5.22778
hSQ004246	203069	3.56953	4.66168	3.35961	4.58019	4.32523
hSQ004258	2954	6.03006	6.23173	5.47453	5.97803	5.67393
hSQ004264	10449	5.97016	6.7582	5.55	5.7749	5.14665
hSQ004268	375690	4.336	5.14287	3.97755	5.11942	3.77776
hSQ004278	124454	6.11967	6.71739	6.35938	6.38138	5.66797
hSQ004279	55540	3.86368	4.8718	3.41667	4.53694	3.69217
hSQ004281	1727	5.27111	6.61054	6.37274	5.89527	6.14479
hSQ004283	995	6.62862	8.41059	6.34768	7.20163	7.47406
hSQ004288	2582	6.29932	7.8018	5.51055	7.36082	7.25901
hSQ004294	7205	6.18853	6.64844	5.37022	7.13428	6.78503
hSQ004295	84172	6.80849	8.26426	7.09282	6.90185	6.67849
hSQ004297	10469	6.09894	5.7083	5.68701	7.11469	6.13984
hSQ004301	3933	4.84242	5.89815	4.30107	5.52823	4.58688
hSQ004302	3212	3.12205	3.50092	2.84143	3.40771	3.20809
hSQ004305	1676	5.50901	6.55967	5.43219	6.18139	4.89181
hSQ004307	2629	8.09373	8.84577	7.94761	8.52759	7.60672
hSQ004308	8398	2.44854	4.22727	2.56248	3.64729	2.81485
hSQ004311	6389	8.46921	9.19711	8.24135	8.86808	7.53971
hSQ004313	64794	6.65719	8.30021	6.35395	7.43577	7.05459
hSQ004313	64794	6.61201	8.24122	6.42018	7.67391	7.09794
hSQ004314	842	4.52042	5.59367	5.04285	5.43577	5.04997
hSQ004318	65989	3.43727	5.05942	2.97033	4.34062	3.84303
hSQ004325	29072	6.20893	7.04086	5.98932	6.76043	6.20572
hSQ004328	64601	5.90899	6.82653	4.84265	6.857	6.00164
hSQ004330	10237	3.89436	4.60627	3.65066	4.58959	4.3749
hSQ004331	6880	3.51312	4.06396	3.35639	3.80101	3.43811
hSQ004332	441743	7.48948	6.74278	7.83831	7.60042	7.59763
hSQ004336	4728	4.95397	5.36174	5.23115	5.92679	4.93058
hSQ004341	10621	4.6087	4.45774	5.05888	5.6479	4.9559
hSQ004344	10744	4.98187	5.3073	4.6317	4.85144	4.62324
hSQ004345	28962	3.29146	4.15698	4.1651	4.36191	4.32577
hSQ004348	8692	4.75752	4.78101	5.27486	5.51054	4.42846
hSQ004354	10272	4.32264	5.78731	4.2423	5.05648	4.32407
hSQ004363	285590	7.82614	8.76617	7.97804	7.98211	7.6994
hSQ004366	51099	3.8957	4.75285	3.97624	3.89845	3.86621
hSQ004367	66000	4.04172	4.42264	4.0601	4.05364	3.63847
hSQ004369	8563	6.11941	7.45497	5.69888	6.717	6.15484
hSQ004371	613	5.55726	6.376	5.60994	6.41554	5.57603
hSQ004372	284086	3.76916	5.42867	4.32765	4.94581	4.09321
hSQ004380	30833	3.74293	4.86805	3.29337	5.16151	4.94792
hSQ004381	7975	5.29664	5.89503	5.00218	5.57736	5.51228
hSQ004385	1017	5.5829	6.30015	5.03767	6.17637	5.88302
hSQ004391	10671	4.62963	4.27383	4.77568	4.75407	4.94768
hSQ004396	440272	4.89663	7.50141	5.58746	8.0939	4.78512
hSQ004398	3236	4.28057	4.94448	4.5211	5.10152	4.31121
hSQ004404	repname(hSQ004404)	2.27912	2.63025	2.08302	2.59475	2.29329
hSQ004406	27243	5.9604	6.77565	5.46465	5.99362	6.30951
hSQ004411	441468	3.39075	4.23385	3.74387	4.03038	3.87942
hSQ004412	22995	3.95334	4.50192	4.18044	5.00956	4.28607
hSQ004419	3301	8.98865	9.07802	7.7954	9.02315	8.48059
hSQ004420	92170	3.67269	4.46817	3.60029	4.29874	3.8879
hSQ004421	1292	5.97449	8.44253	6.26808	7.21738	6.47849
hSQ004422	6175	3.61587	3.97741	3.1727	4.18033	3.33284
hSQ004423	392758	4.66679	4.90896	4.46202	5.17162	4.85586
hSQ004424	153090	4.48768	5.33136	4.74959	5.62572	5.0078
hSQ004425	80013	5.67337	5.95999	4.73911	5.31656	5.53167
hSQ004427	11162	4.73896	5.55157	4.55883	4.76467	4.72228
hSQ004432	55353	6.24782	6.28748	6.04189	6.6965	5.73688
hSQ004436	9955	4.9342	5.15063	4.96319	5.1215	5.37017
hSQ004440	repname(hSQ004440)	7.78893	6.86067	7.75814	8.70555	7.86559
hSQ004440	repname(hSQ004440)	7.7857	6.73156	7.74544	8.63955	7.79178
hSQ004440	repname(hSQ004440)	7.70089	6.7826	7.82903	8.6642	7.74373
hSQ004440	repname(hSQ004440)	7.8447	6.84426	7.81159	8.59283	6.69153
hSQ004440	repname(hSQ004440)	7.92569	6.73149	7.66102	8.56857	7.43342
hSQ004443	11119	4.32724	5.15806	4.27306	4.60506	4.54793
hSQ004445	94058	5.30585	6.30106	6.14799	5.87911	5.77928
hSQ004446	1033	2.91551	3.62247	2.83596	3.28611	3.4636
hSQ004451	8481	5.84203	6.9993	5.47345	7.01773	6.49643
hSQ004454	887	4.38787	7.05001	4.71196	5.61809	5.35128
hSQ004461	10048	6.3069	6.49314	6.81172	6.69573	7.20567
hSQ004464	1120	2.73366	4.20718	2.7728	4.21302	3.69702
hSQ004466	389835	5.54767	5.30243	4.91237	5.2967	5.35107
hSQ004472	9755	3.97984	5.16256	4.45792	4.78169	4.03532
hSQ004475	192286	4.32574	4.50559	4.68248	4.92853	4.80481
hSQ004479	64802	4.1724	6.65134	5.03659	4.92699	5.22938
hSQ004481	5442	7.47888	9.03686	7.01491	8.08409	8.08106
hSQ004485	80816	4.56972	5.12609	5.71809	5.68029	4.57705
hSQ004486	257218	5.80634	6.26173	5.32467	7.21591	6.25476
hSQ004487	1743	6.7087	8.33876	8.70539	7.2414	6.59653
hSQ004488	1876	4.36006	4.59897	4.19978	4.6194	4.57821
hSQ004489	255252	3.51448	4.46311	4.61266	4.30715	4.42952
hSQ004492	7392	3.8465	4.75963	3.63068	4.71223	4.33517
hSQ004496	5694	7.22663	6.62415	7.08382	7.45259	7.3576
hSQ004497	10793::90816	3.06029	3.67453	3.57847	3.62954	3.30568
hSQ004498	7260	4.23046	4.36541	3.37799	4.71381	4.75702
hSQ004500	repname(hSQ004500)	2.356	2.11295	2.20363	1.97026	2.04827
hSQ004500	repname(hSQ004500)	2.34819	2.10879	2.2123	2.04554	1.85729
hSQ004500	repname(hSQ004500)	2.37691	2.09625	2.22469	2.08668	2.04534
hSQ004500	repname(hSQ004500)	2.43324	1.87837	2.21495	2.11641	1.84892
hSQ004500	repname(hSQ004500)	2.4097	2.23364	2.293	2.18709	1.67802
hSQ004509	675	5.64443	6.17485	6.6114	6.71512	5.84904
hSQ004510	51776	6.39737	6.28702	5.46589	6.75029	6.04974
hSQ004516	54558	3.28549	4.86136	4.25317	4.807	4.54797
hSQ004520	148203	3.00777	3.91392	3.19512	3.68664	3.56984
hSQ004522	23640	6.81848	7.76784	6.39351	7.60988	6.30137
hSQ004527	166929	4.67265	5.83898	5.78746	4.52647	4.39021
hSQ004528	repname(hSQ004528)	3.80383	4.3231	5.48317	5.92273	4.5039
hSQ004531	8502	3.07879	4.21364	3.30753	3.77088	3.19243
hSQ004533	79711	8.39349	8.74192	7.57664	9.26232	7.76314
hSQ004536	23142	4.28474	5.03035	4.57673	4.66987	5.01357
hSQ004537	51335	4.91925	5.07637	4.82485	5.34553	4.07271
hSQ004538	23355	5.68507	6.60158	5.37286	6.37002	5.59324
hSQ004539	1650	6.76602	7.29395	6.28713	7.0261	6.33587
hSQ004542	4738	5.29443	4.59688	6.20038	6.33273	6.38362
hSQ004544	84458	4.28844	4.16889	4.33802	5.30475	4.54965
hSQ004546	84450	6.82747	6.83104	7.00176	6.86676	6.15317
hSQ004547	3216	4.78257	5.47534	4.01725	5.43687	4.6163
hSQ004548	repname(hSQ004548)	4.42495	4.7447	4.14609	5.18608	4.52589
hSQ004549	6720	7.13483	7.29082	6.7394	7.61263	7.46805
hSQ004550	7867	3.97818	5.16529	4.21976	4.65891	4.25421
hSQ004551	84503	3.19278	4.34484	3.42925	3.57405	3.44631
hSQ004552	4867	5.40007	7.18317	4.68016	5.99267	6.06949
hSQ004554	23786	4.4423	5.09854	4.70722	4.87803	4.29237
hSQ004557	54734	2.57987	3.67462	2.92694	3.36446	3.24302
hSQ004559	54602	4.91372	5.30465	6.2491	5.82906	5.41758
hSQ004560	9898	6.41103	8.07391	6.47976	7.384	6.06019
hSQ004565	6904	7.72257	8.74976	7.59119	8.60564	7.43977
hSQ004567	8073	4.64739	5.2589	5.80274	5.12001	4.49802
hSQ004572	116832	2.79335	3.95792	3.40192	3.94459	4.39721
hSQ004574	5134	2.77569	3.87198	3.06978	3.57593	3.17706
hSQ004581	65990	4.30753	5.03801	4.63973	5.37193	4.64359
hSQ004582	79095	3.65767	4.38501	4.01245	4.89473	3.3316
hSQ004583	10897	5.58846	5.73884	5.4433	6.44116	5.30435
hSQ004584	25973	5.86981	7.72943	6.00174	6.59219	6.43425
hSQ004589	10042	4.07694	5.3788	3.5424	5.37236	3.99174
hSQ004591	84747	4.22934	5.058	4.76923	4.72895	4.08737
hSQ004595	51105	3.79893	3.91227	5.32198	5.06085	4.72049
hSQ004596	56993	4.14439	4.45848	4.53346	4.55675	4.68096
hSQ004598	51070	6.64411	7.02143	5.62462	6.97077	7.11083
hSQ004599	93622	4.82407	5.0917	4.54249	5.15905	5.00803
hSQ004601	6396	8.8293	8.91814	8.54476	8.62616	9.28236
hSQ004610	54785	5.60618	6.48345	5.4908	5.68856	5.94273
hSQ004612	171392	3.8013	4.08148	3.65262	4.44681	4.19102
hSQ004631	113655	4.61799	5.18728	4.2003	5.16563	4.92295
hSQ004637	51385	4.00371	4.90359	4.06195	4.34011	4.24298
hSQ004638	440172	5.75796	5.20939	5.81346	5.28028	5.22644
hSQ004643	84641	3.53261	3.48399	4.4369	3.82679	3.98658
hSQ004648	283267	4.22891	4.95951	4.35583	4.7167	3.9619
hSQ004649	124540	3.98804	5.68639	4.25164	4.81608	4.50005
hSQ004650	6548	6.12448	7.60741	6.69078	7.10101	5.96135
hSQ004652	8722	4.43952	5.56058	4.23983	5.07853	5.15134
hSQ004655	10213	11.1182	10.0773	13.5194	12.0381	13.5554
hSQ004656	1660	6.55815	8.91311	6.00253	8.60318	7.49721
hSQ004662	5433	2.71597	3.71809	2.84922	3.69076	3.52246
hSQ004663	6611	5.12584	4.72493	4.97246	5.11187	4.26574
hSQ004670	51634	6.24499	6.94786	5.97179	6.44595	6.04194
hSQ004676	2019	4.20058	6.67968	4.81723	5.37034	5.12214
hSQ004686	91272	4.19068	5.18822	3.9622	5.00727	4.89492
hSQ004691	55651	4.50322	3.80759	4.14979	4.8096	3.94508
hSQ004692	170394	5.59098	6.77077	5.12218	5.83723	5.45105
hSQ004697	56926::390876	3.52067	3.98889	3.60649	4.30556	4.08892
hSQ004700	6202	7.47788	6.78753	8.87946	7.94912	4.66324
hSQ004701	873	6.54895	7.25033	6.28278	7.84336	7.71034
hSQ004702	84707	5.61581	5.85489	5.92014	6.03949	5.81645
hSQ004705	6426	9.66275	8.04121	11.9707	8.70806	7.71696
hSQ004706	56674	2.8439	4.01152	3.02926	3.71915	3.51551
hSQ004714	55119	4.33347	5.58792	4.63966	5.25234	4.57647
hSQ004716	8361	2.87577	3.38626	2.63728	3.31039	3.26899
hSQ004719	391174	5.31801	5.78976	4.89076	5.99342	5.2652
hSQ004725	10761	5.21045	6.8338	4.46694	5.84986	5.87802
hSQ004726	84954	3.51388	4.90468	3.36746	4.73693	4.24277
hSQ004728	54976	3.75935	4.23396	3.58219	4.35169	3.39943
hSQ004730	7137	4.31833	4.85706	3.64125	5.163	4.52233
hSQ004737	1933	4.54495	5.1148	4.13135	5.18178	4.58904
hSQ004741	55009	3.33749	3.80002	3.42854	4.26885	2.87112
hSQ004746	3609	4.46019	6.35849	5.83658	6.84433	5.42809
hSQ004757	10528	6.78273	7.63901	6.47374	8.20365	6.90798
hSQ004758	5170	4.93722	5.99747	5.21386	6.36441	5.20934
hSQ004761	150223	4.03523	4.05984	3.99741	4.90064	3.70887
hSQ004764	401638	6.32039	6.37175	6.35311	7.12901	6.48832
hSQ004768	9894	6.61973	7.5371	5.6344	6.99611	6.03863
hSQ004771	5073	6.81137	8.2396	7.03608	7.14552	6.35054
hSQ004773	374666	3.48777	4.02369	3.1333	4.3621	3.70848
hSQ004774	390277	3.64578	4.66099	3.75044	4.40621	4.43735
hSQ004775	26284	5.22251	6.11914	4.74075	5.58983	5.48935
hSQ004780	9775	11.5785	10.305	12.0262	11.1323	12.1075
hSQ004782	79068	8.02045	7.64453	9.05138	7.2962	6.93947
hSQ004792	113251	5.34727	6.72432	4.92441	5.70352	3.69517
hSQ004798	399668	2.52888	3.50092	2.4276	3.53145	3.23269
hSQ004799	2803	4.94199	5.65476	5.34776	5.74219	5.0058
hSQ004800	8834	5.10981	5.27012	4.99324	5.5098	4.32043
hSQ004801	390345	3.08758	3.48688	2.67302	3.4649	2.76268
hSQ004803	348235	3.27941	3.65917	3.19335	3.57677	3.00234
hSQ004804	23594	4.21878	4.06044	5.16862	5.179	4.25603
hSQ004810	27246	4.32336	4.65844	4.28774	5.25985	5.14845
hSQ004816	50628	8.81459	8.88281	8.93366	9.0047	7.43571
hSQ004820	5597	4.39573	4.77207	4.67055	4.39044	4.97241
hSQ004822	81037	4.60214	5.07024	4.86785	5.0426	4.1576
hSQ004823	29117	4.52271	4.78215	4.73291	4.92942	4.68834
hSQ004827	10058	4.74895	5.29499	5.13104	5.71364	5.33201
hSQ004829	346950	3.93989	3.68633	4.02079	4.07327	3.77443
hSQ004832	441121	2.65454	3.89708	3.32366	3.86536	3.54446
hSQ004835	56927	4.65463	5.93611	4.03205	5.9083	4.49907
hSQ004837	6241	8.31554	8.72874	8.98617	8.63428	7.63265
hSQ004839	26092	6.63669	6.77278	6.25251	6.93418	6.2897
hSQ004843	10296	8.2794	7.0593	7.85098	7.80165	7.62831
hSQ004851	3831	7.64268	8.6614	7.74793	7.85706	7.82172
hSQ004852	51755	7.40998	7.78703	8.28594	8.08124	7.52909
hSQ004853	57165	4.73134	5.71164	5.3461	5.47939	5.52187
hSQ004855	80776	4.81727	4.618	5.17654	5.58057	5.26268
hSQ004857	55898	8.21756	8.60447	8.04734	8.62074	7.77139
hSQ004858	1164	5.19226	5.20358	5.91355	4.94089	5.5298
hSQ004861	388621	4.31138	3.69552	4.5727	4.61517	4.05969
hSQ004870	84144	3.11909	4.63427	8.40018	4.17977	3.85966
hSQ004872	283454	2.9258	3.60859	3.38122	3.56446	2.92176
hSQ004873	3251	5.5079	5.86831	6.62584	5.45844	6.08437
hSQ004875	8209	5.377	5.8398	4.76656	5.77661	5.38821
hSQ004876	112936	4.01204	5.9221	4.84563	5.24754	4.76907
hSQ004878	22832	4.47971	5.52135	4.8161	5.08577	4.35892
hSQ004881	6130	6.73495	6.15071	6.65459	6.73144	4.68005
hSQ004882	91687	4.68699	4.23056	4.61879	4.48936	4.87584
hSQ004884	25871	4.52267	5.68546	5.31377	5.35025	4.50056
hSQ004885	4867	2.59783	2.93877	2.49148	3.61898	3.45103
hSQ004888	57475	3.31774	4.70188	3.94895	3.95197	3.61454
hSQ004889	9451	5.10457	5.60997	6.25457	5.11298	5.41465
hSQ004890	55425	5.29948	5.03434	5.7384	5.7341	5.03411
hSQ004892	51318	5.32931	5.28039	5.60218	5.32517	5.33206
hSQ004894	10615	5.61755	7.25167	5.20552	7.18484	6.52378
hSQ004896	5464	7.34504	6.93048	8.39556	8.32586	8.05255
hSQ004898	221710	3.15401	3.34516	3.45435	3.73714	2.97584
hSQ004900	84255	3.33469	5.47593	3.89431	4.80272	4.39416
hSQ004901	256643	3.69172	4.44487	4.02746	4.32185	4.1929
hSQ004902	124936	5.15479	5.49219	4.83141	5.67704	4.7773
hSQ004903	55909	5.22838	6.11883	4.26019	5.842	5.70102
hSQ004904	55164	6.69065	8.081	6.60514	6.89639	6.75726
hSQ004905	351	9.62229	10.1307	12.696	8.27904	7.76948
hSQ004908	3029	3.94369	4.73385	3.75313	5.18827	4.73976
hSQ004909	55998	2.32373	3.35978	2.3871	2.74245	2.79969
hSQ004914	22955	3.60512	4.15627	3.46125	3.91363	3.427
hSQ004918	285830	6.74544	5.0124	6.86824	6.1446	4.27542
hSQ004920	51535	7.70927	8.36154	6.9626	7.39374	7.5136
hSQ004921	388242	6.20804	6.79913	6.57442	7.04775	5.54859
hSQ004926	9670	5.06553	6.63409	5.07497	5.84533	4.79784
hSQ004928	1471	4.53665	5.18652	4.4947	5.3797	4.35746
hSQ004929	22905	5.81574	6.52235	5.56258	6.49013	6.06152
hSQ004930	9054	5.50667	7.02904	5.45478	7.24452	7.06611
hSQ004935	1429	6.96643	7.67139	5.67337	6.66956	6.95557
hSQ004936	26284	5.22346	6.11171	4.91851	5.72597	5.24525
hSQ004937	7290	4.84462	4.59086	6.2126	4.73413	4.18515
hSQ004938	8674	3.01174	4.03402	2.93205	3.63571	3.87683
hSQ004942	23582	5.20542	6.65472	5.00098	6.43322	6.28631
hSQ004946	2152	2.12965	3.28219	2.88565	3.89029	3.59041
hSQ004947	57092	3.92465	3.33089	4.40313	4.18963	3.7757
hSQ004954	85388::26822	2.19923	2.10475	1.86926	2.35069	1.75707
hSQ004955	22809	4.77666	5.23652	3.95761	4.43572	3.55707
hSQ004956	150472	4.24457	3.71725	4.2055	4.18081	3.57268
hSQ004959	84954	3.5905	4.61922	3.49728	4.38381	4.14669
hSQ004965	80139	4.87444	7.47167	5.05525	6.59852	5.26204
hSQ004969	5989	5.67164	6.72477	5.77928	5.16892	4.52692
hSQ004970	1039	5.65915	5.77758	7.3826	6.2301	5.73805
hSQ004972	51447	7.08009	7.23273	6.67312	7.86853	7.9311
hSQ004973	26267	4.68158	5.01082	4.62391	5.27932	4.77626
hSQ004975	9528	5.65024	5.51916	6.43594	5.50123	5.98219
hSQ004980	2040	5.83156	6.60789	6.65974	6.09849	5.81314
hSQ004981	9208	6.62651	7.21086	6.91006	8.83849	6.52378
hSQ004985	51160	5.51671	6.45442	5.09761	6.40153	5.40774
hSQ004990	55974	4.15432	4.72442	3.84964	4.64985	3.54257
hSQ004991	5567	6.74355	7.54978	7.9003	7.39319	7.08648
hSQ004995	5879	6.12772	6.33665	6.84676	6.28912	7.01438
hSQ004996	5019	8.73591	8.96972	8.9731	8.65199	8.79705
hSQ004997	57634	2.67185	3.50092	3.35653	3.54718	3.36738
hSQ004998	54623	7.49184	9.34488	6.67763	8.36015	7.39536
hSQ005003	9727	3.62847	4.55597	3.43845	4.17872	4.02375
hSQ005012	81631	4.5397	4.6548	4.5019	4.6333	4.76034
hSQ005018	5001	8.01487	8.32325	7.82679	8.17169	7.37454
hSQ005024	5025	3.97777	4.76175	4.37784	4.80638	4.61182
hSQ005031	2639	6.26687	7.34138	5.96188	6.82901	5.98484
hSQ005032	308	12.0593	9.62174	14.2531	10.1653	11.61
hSQ005035	2077	4.38783	5.62871	4.67457	5.51148	4.96475
hSQ005039	7431	14.858	12.8105	15.836	13.0265	11.3052
hSQ005039	7431	14.4394	11.0659	15.804	12.538	12.1529
hSQ005040	283970	3.35789	4.1551	3.08315	3.81792	2.92911
hSQ005041	55702	6.12973	6.91313	6.90224	6.62817	6.95116
hSQ005044	10723	5.74266	6.65916	5.35037	6.81079	5.82742
hSQ005047	7702	6.5202	7.52947	6.9847	7.20935	7.36757
hSQ005050	8847	2.00505	1.93321	1.55271	1.98335	1.81496
hSQ005074	3399	5.36011	5.00424	5.36951	5.06106	5.44357
hSQ005076	2139	5.93723	7.89266	6.3092	6.73817	6.38182
hSQ005078	23648	5.83047	6.61097	6.52845	5.37783	5.47654
hSQ005085	1186	5.62599	6.477	5.75992	6.59938	6.01155
hSQ005086	10869	7.10533	8.40494	6.89495	8.00778	7.14275
hSQ005087	539	7.1492	7.55149	8.50202	7.86285	8.53672
hSQ005090	112703	3.60244	4.86692	3.23145	4.39866	4.01694
[truncated: 16,731 more rows]

## Sheet: Ribosome_number_SAM_output
gene_id	gene_names	Score.d.	Numerator.r.	Denominator.s.s0.	Fold.Change	q.value...	localfdr...	group1_mean	group2_mean
hSQ016057	3915	-5.98403	-3.11055	0.519808	0.114696	0	34.6882	7.96733	4.85678
hSQ031614	3688	-5.24088	-3.29878	0.629434	0.0990107	0	39.4052	8.31588	5.0171
hSQ023489	25923	-4.93722	-2.94302	0.596088	0.127567	0	39.7108	6.35697	3.41395
hSQ009965	3032	-4.4086	-2.02169	0.458578	0.247023	0	35.6864	10.2026	8.18089
hSQ012369	29128	-4.15932	-2.45118	0.589323	0.180516	0	33.349	9.9086	7.45742
hSQ025040	4001	-3.94662	-3.31753	0.8406	0.0970221	4.52996	31.6372	10.7886	7.4711
hSQ024710	54502	-3.8824	-2.46634	0.635261	0.178177	4.52996	31.2127	7.07654	4.61021
hSQ006827	4001	-3.8722	-5.98784	1.54637	0.0123231	4.52996	31.1499	13.7136	7.72577
hSQ008456	5052	-3.81553	-1.68205	0.440843	0.312124	4.52996	30.8245	9.40327	7.72122
hSQ000815	400741	-3.59407	-2.10225	0.584922	0.23189	16.3079	29.9556	10.7366	8.63431
hSQ018707	3688	-3.502	-2.32055	0.662634	0.195528	16.3079	29.7967	7.30517	4.98462
hSQ028365	23062	-3.50013	-1.89346	0.540968	0.269055	16.3079	29.7949	6.30574	4.41228
hSQ044118	23303	-3.48855	-1.86162	0.533637	0.271851	16.3079	29.7847	6.08421	4.2226
hSQ008153	83879	-3.39392	-1.85935	0.547848	0.272588	16.3079	29.7881	6.73782	4.87846
hSQ043586	27236	-3.35611	-1.72248	0.513237	0.300499	16.3079	29.835	8.24606	6.52358
hSQ037182	351	-3.32787	-3.68657	1.10778	0.064814	16.3079	29.8884	11.7627	8.07618
hSQ039185	351	-3.23216	-3.58374	1.10877	0.0716594	16.3079	30.1975	11.1463	7.56256
hSQ029892	1500	-3.21259	-1.90989	0.594501	0.265332	16.3079	30.2871	8.0489	6.13902
hSQ002756	5089	-3.1977	-3.60946	1.12877	0.0774972	16.3079	30.3615	7.98693	4.37747
hSQ010458	5089	-3.18543	-3.65156	1.14633	0.0747808	16.3079	30.427	7.84841	4.19685
hSQ013280	9341	-3.16357	-1.49582	0.472825	0.35275	16.3079	30.5532	4.96575	3.46993
hSQ028046	115548	-3.14755	-2.0667	0.656605	0.231413	16.3079	30.6534	6.6104	4.5437
hSQ008279	8148	-3.14291	-5.76352	1.83382	0.0121882	16.3079	30.6836	11.4293	5.66575
hSQ026626	1432	-3.0396	-1.99445	0.656155	0.245992	19.1857	31.5081	7.5093	5.51484
hSQ021962	3032	-3.02775	-3.81501	1.26002	0.0571495	19.1857	31.6218	10.8595	7.04447
hSQ000706	286077	-2.98847	-2.50145	0.837033	0.164865	19.1857	32.0275	6.82952	4.32807
hSQ027436	5725	-2.94491	-3.29599	1.11922	0.0867144	19.1857	32.5309	11.4912	8.19526
hSQ023086	64215	-2.90983	-1.90817	0.655767	0.265375	19.1857	32.9776	8.68802	6.77985
hSQ035948	5420	-2.89993	-1.51699	0.523115	0.350469	19.1857	33.1104	6.99483	5.47783
hSQ010708	10146	-2.8986	-4.83619	1.66846	0.0222243	23.1317	33.1285	15.0742	10.238
hSQ003259	3688	-2.89011	-1.67148	0.578347	0.309764	23.1317	33.2452	6.99919	5.32771
hSQ005764	389395	-2.87898	-1.33563	0.463924	0.395364	23.1317	33.4013	7.66798	6.33235
hSQ024722	3191	-2.84011	-1.37535	0.484258	0.384575	23.1317	33.9766	8.56645	7.1911
hSQ001220	3688	-2.81105	-2.55953	0.910522	0.153619	23.1317	34.4374	7.5994	5.03988
hSQ001053	54800	-2.7558	-2.10843	0.76509	0.221536	27.1798	35.3869	7.23867	5.13023
hSQ006558	5033	-2.74851	-1.52546	0.555011	0.348763	27.1798	35.5192	8.12009	6.59463
hSQ002956	4627	-2.6623	-1.97641	0.74237	0.243195	27.1798	37.2169	8.28117	6.30476
hSQ028383	79837	-2.63873	-1.41096	0.534713	0.37245	28.0565	37.7235	7.1133	5.70234
hSQ034661	5937	-2.62899	-1.3258	0.504301	0.397723	28.0565	37.9381	6.71341	5.38761
hSQ027246	134429	-2.62295	-1.07784	0.410926	0.473209	28.0565	38.073	4.66722	3.58938
hSQ006568	83786	-2.62253	-1.57538	0.60071	0.332121	28.0565	38.0822	6.38474	4.80936
hSQ024026	351	-2.61894	-3.30161	1.26067	0.0803705	28.0565	38.163	10.7577	7.45608
hSQ022543	6584	-2.61161	-1.07872	0.413046	0.472399	28.0565	38.3291	5.6301	4.55138
hSQ036224	351	-2.59217	-2.93235	1.13123	0.115982	28.0565	38.7783	10.4375	7.5051
hSQ023181	91754	-2.58933	-1.636	0.631823	0.314727	28.0565	38.845	6.13754	4.50154
hSQ020195	152579	-2.55606	-1.37016	0.536046	0.381844	28.0565	39.6454	9.50746	8.1373
hSQ015837	8829	-2.5538	-1.07562	0.421183	0.474088	28.0565	39.7009	7.40406	6.32844
hSQ009765	351	-2.54204	-3.8781	1.52558	0.0476877	28.0565	39.9932	11.688	7.80986
hSQ032615	26958	-2.52365	-1.43996	0.570585	0.362559	28.0565	40.4589	8.93495	7.49499
hSQ005436	351	-2.51221	-3.24492	1.29166	0.0790549	28.0565	40.754	10.8714	7.62648
hSQ041042	351	-2.50619	-2.53754	1.01251	0.151705	28.0565	40.9108	10.8709	8.33337
hSQ034545	57530	-2.48701	-1.54118	0.619693	0.337992	28.0565	41.4182	5.84734	4.30616
hSQ036399	23189	-2.47007	-1.34609	0.544961	0.39308	28.0565	41.8755	6.3598	5.01371
hSQ017331	285464	-2.46135	-1.19309	0.484729	0.438036	28.0565	42.1142	5.75822	4.56514
hSQ033422	1910	-2.43144	-1.10083	0.452748	0.464551	32.4745	42.9503	8.40293	7.30209
hSQ045257	7314	-2.42459	-2.38384	0.983193	0.19967	32.4745	43.1455	12.0525	9.66869
hSQ025392	60	-2.41107	-1.71955	0.713187	0.293371	32.4745	43.5347	8.81255	7.47652
hSQ016302	351	-2.40571	-3.92013	1.62951	0.0393937	32.4745	43.6904	11.4425	7.52233
hSQ032183	78993	-2.40209	-1.217	0.506643	0.430709	32.4745	43.7962	4.66876	3.45176
hSQ012120	55526	-2.38761	-1.06465	0.445906	0.479724	32.4745	44.2225	6.51699	5.45233
hSQ015240	1432	-2.37431	-1.24919	0.526126	0.415927	32.4745	44.6195	6.26226	5.01307
hSQ044726	5140	-2.35397	-1.0141	0.430803	0.495793	32.4745	45.2362	5.70459	4.69049
hSQ030150	5236	-2.34387	-1.69874	0.724759	0.327803	32.4745	45.5468	9.91541	8.21667
hSQ004969	5989	-2.30795	-1.31035	0.567757	0.396435	34.9454	46.6758	6.09845	4.78809
hSQ015858	5933	-2.30308	-1.20688	0.524029	0.430368	34.9454	46.8317	6.71978	5.5129
hSQ023829	50848	-2.299	-1.6261	0.707309	0.316865	34.9454	46.963	7.32044	5.69433
hSQ022388	11329	-2.29645	-1.18901	0.517763	0.434575	34.9454	47.0454	6.52243	5.33341
hSQ017678	1362	-2.28429	-1.21507	0.531927	0.42979	34.9454	47.4407	8.17028	6.95521
hSQ038752	10492	-2.2823	-1.22452	0.536531	0.432676	34.9454	47.5058	9.57823	8.35371
hSQ040842	56999	-2.28185	-1.77496	0.77786	0.288361	34.9454	47.5204	6.19936	4.4244
hSQ033192	118429	-2.27946	-1.37099	0.601453	0.37837	34.9454	47.5987	8.17476	6.80377
hSQ042659	55276	-2.27923	-1.54148	0.676315	0.343864	34.9454	47.6063	8.67773	7.13625
hSQ010390	5518	-2.26591	-1.2402	0.547332	0.419216	34.9454	48.0469	9.19302	7.95281
hSQ008501	6894	-2.26037	-1.2427	0.549777	0.420143	34.9454	48.2317	5.22617	3.98348
hSQ037593	8763	-2.25784	-2.449	1.08467	0.158239	34.9454	48.3163	6.65904	4.21004
hSQ010497	84295	-2.22701	-1.026	0.460705	0.489104	34.9454	49.3648	8.3211	7.29511
hSQ033670	repname(hSQ033670)	-2.22553	-1.13461	0.509814	0.454214	34.9454	49.416	6.89135	5.75674
hSQ023025	3988	-2.22084	-0.970657	0.437068	0.511597	34.9454	49.5784	9.13806	8.16741
hSQ014047	3725	-2.21548	-2.18295	0.985317	0.206613	34.9454	49.7649	8.82191	6.63896
hSQ020981	351	-2.21547	-3.49224	1.5763	0.0563359	34.9454	49.7652	11.1999	7.70767
hSQ012939	5754	-2.21418	-1.32511	0.598463	0.40017	34.9454	49.8101	7.26996	5.94486
hSQ006709	79837	-2.21274	-1.52226	0.687954	0.334741	34.9454	49.8605	7.34899	5.82673
hSQ004193	54433	-2.20758	-1.4839	0.672181	0.354671	34.9454	50.041	7.36654	5.88264
hSQ041769	6595	-2.20079	-1.06057	0.481905	0.479358	34.9454	50.2801	7.29559	6.23501
hSQ031496	4811	-2.19904	-2.25211	1.02414	0.199176	34.9454	50.3422	9.32948	7.07737
hSQ029297	5888	-2.17565	-1.61676	0.743113	0.348284	34.9454	51.178	7.87613	6.25938
hSQ033687	3151	-2.17333	-2.06042	0.948051	0.236713	34.9454	51.2621	7.92575	5.86533
hSQ001210	351	-2.16282	-3.79743	1.75578	0.0418902	34.9454	51.644	11.4017	7.60427
hSQ016805	6856	-2.16212	-2.40755	1.11351	0.160041	34.9454	51.6693	7.86278	5.45523
hSQ012348	29083	-2.15681	-1.24187	0.57579	0.415111	34.9454	51.8639	6.65919	5.41733
hSQ008623	27148	-2.14717	-1.20083	0.559262	0.429255	34.9454	52.219	5.35667	4.15585
hSQ034322	1459	-2.14155	-0.9078	0.423898	0.53148	34.9454	52.4271	7.07803	6.17023
hSQ023388	10163	-2.1395	-0.931888	0.435563	0.526466	34.9454	52.5032	6.26448	5.33259
hSQ024974	10097	-2.13576	-2.28951	1.07199	0.17553	34.9454	52.6427	8.99986	6.71035
hSQ038017	6389	-2.12904	-1.07219	0.503601	0.47746	34.9454	52.8944	8.48244	7.96853
hSQ025700	9258	-2.1279	-1.31945	0.620071	0.404754	34.9454	52.937	4.90748	3.58803
hSQ021504	3939	-2.12537	-3.27047	1.53877	0.172477	34.9454	53.0321	15.5645	12.294
hSQ025392	60	-2.12138	-2.1705	1.02316	0.202489	34.9454	53.1827	8.81255	7.47652
hSQ017301	3190	-2.12079	-1.44829	0.6829	0.376075	34.9454	53.2048	10.8281	9.3798
hSQ016704	8985	-2.12037	-2.3567	1.11145	0.176937	34.9454	53.2207	7.2066	4.8499
hSQ002653	57217	-2.11865	-1.60531	0.757703	0.313496	34.9454	53.2859	5.77671	4.17141
hSQ003105	23598	-2.1126	-1.01733	0.481552	0.49427	34.9454	53.5156	7.44858	6.43126
hSQ010389	60681	-2.1069	-1.96404	0.932195	0.245723	34.9454	53.7327	7.45679	5.49275
hSQ025392	60	-2.09884	-1.88222	0.896793	0.249106	34.9454	54.0418	8.81255	7.47652
hSQ034237	26019	-2.09577	-1.00081	0.477537	0.502676	34.9454	54.1597	7.42147	6.42066
hSQ037550	7094	-2.09185	-1.61783	0.773394	0.323623	34.9454	54.3109	7.27536	5.65753
hSQ042495	3833	-2.08498	-2.0775	0.996413	0.210997	34.9454	54.5775	9.21059	7.13309
hSQ020618	1836	-2.08332	-1.4242	0.683622	0.363139	34.9454	54.642	6.45992	5.03572
hSQ026329	678	-2.07855	-0.91324	0.439365	0.533652	34.9454	54.828	6.03272	5.11948
hSQ012084	9107	-2.07842	-1.04024	0.500497	0.48296	34.9454	54.8329	8.46887	7.42863
hSQ025392	60	-2.07815	-1.86471	0.897291	0.252036	34.9454	54.8434	8.81255	7.47652
hSQ025392	60	-2.07551	-1.70173	0.819906	0.289269	34.9454	54.9465	8.81255	7.47652
hSQ018888	351	-2.07526	-3.54792	1.70963	0.0548404	34.9454	54.9565	11.5958	8.04786
hSQ025392	60	-2.07502	-1.92683	0.928584	0.238854	34.9454	54.966	8.81255	7.47652
hSQ015594	55133	-2.06385	-1.13935	0.552053	0.459938	34.9454	55.4053	8.64483	7.50547
hSQ008043	50848	-2.06312	-1.71275	0.830175	0.287699	34.9454	55.4339	7.01797	5.30521
hSQ025392	60	-2.05761	-1.70816	0.830163	0.289358	34.9454	55.6519	8.81255	7.47652
hSQ025392	60	-2.05303	-1.6595	0.808316	0.299181	34.9454	55.8341	8.81255	7.47652
hSQ015608	57575	-2.04326	-1.82064	0.891044	0.280245	34.9454	56.2243	7.38636	5.56573
hSQ031392	23268	-2.04202	-0.821695	0.402392	0.565449	34.9454	56.2741	6.49217	5.67047
hSQ027128	351	-2.0411	-3.69645	1.81101	0.041792	34.9454	56.3109	11.3486	7.65218
hSQ006417	351	-2.0361	-1.42618	0.700445	0.358536	34.9454	56.5122	10.1202	7.61394
hSQ042415	4359	-2.03553	-1.46546	0.719942	0.380987	34.9454	56.5354	7.04895	5.58349
hSQ033122	9477	-2.03363	-1.21123	0.5956	0.430918	34.9454	56.612	6.83323	5.622
hSQ025392	60	-2.03163	-1.82977	0.900641	0.257666	34.9454	56.6927	8.81255	7.47652
hSQ031984	6591	-2.02455	-1.00976	0.498761	0.494951	34.9454	56.98	3.93471	2.92494
hSQ017781	6714	-2.02284	-0.795625	0.39332	0.576563	34.9454	57.0491	6.51083	5.7152
hSQ005910	11338	-2.01847	-1.97764	0.979774	0.228385	34.9454	57.2275	7.8806	5.90295
hSQ025392	60	-2.01224	-1.52487	0.7578	0.329502	34.9454	57.4824	8.81255	7.47652
hSQ025392	60	-2.01211	-1.82972	0.909357	0.256706	34.9454	57.4878	8.81255	7.47652
hSQ025392	60	-2.01181	-1.83542	0.912325	0.25489	34.9454	57.5002	8.81255	7.47652
hSQ002895	4137	-2.01156	-1.57394	0.782446	0.328633	34.9454	57.5102	8.23282	6.65888
hSQ027594	23500	-2.00833	-1.7091	0.851007	0.290902	34.9454	57.6428	6.5611	4.852
hSQ008820	79068	-2.00703	-1.07722	0.536721	0.479728	34.9454	57.6964	8.22219	7.14497
hSQ019302	26747	-2.00431	-1.05421	0.525969	0.481449	34.9454	57.8082	8.38361	7.32941
hSQ025392	60	-1.99821	-1.93947	0.970605	0.233263	34.9454	58.0604	8.81255	7.47652
hSQ025392	60	-1.99481	-1.82179	0.913263	0.259469	34.9454	58.2014	8.81255	7.47652
hSQ025392	60	-1.99224	-1.62161	0.813962	0.310942	34.9454	58.3082	8.81255	7.47652
hSQ003959	79073	-1.98377	-2.25333	1.13588	0.184102	34.9454	58.6612	9.06796	6.81463
hSQ008776	6662	-1.97726	-1.03033	0.521092	0.488292	34.9454	58.9342	8.28005	7.24972
hSQ025392	60	-1.97202	-1.90299	0.964997	0.240031	34.9454	59.1547	8.81255	7.47652
hSQ031353	196	-1.97109	-0.983509	0.498968	0.51056	34.9454	59.1939	7.29705	6.31354
hSQ044404	57610	-1.97054	-1.05712	0.536464	0.474421	34.9454	59.217	5.81689	4.75977
hSQ006919	55227	-1.97006	-1.20573	0.612028	0.44672	34.9454	59.2375	6.28873	5.083
hSQ042321	1490	-1.96119	-1.37247	0.699813	0.387775	34.9454	59.6125	7.07551	5.70304
hSQ025392	60	-1.95949	-1.93797	0.989016	0.233362	34.9454	59.6849	8.81255	7.47652
hSQ009943	9410	-1.95706	-0.734481	0.375298	0.601099	34.9454	59.7881	7.10731	6.37283
hSQ025392	60	-1.95501	-1.97818	1.01186	0.224818	34.9454	59.8757	8.81255	7.47652
hSQ004178	2597	-1.95421	-3.05114	1.56132	0.0864237	34.9454	59.9097	11.7633	11.93
hSQ008785	80263	-1.9538	-1.30551	0.668192	0.392388	34.9454	59.9271	4.20923	2.90372
hSQ025392	60	-1.94925	-1.38335	0.709681	0.369047	34.9454	60.1212	8.81255	7.47652
hSQ017893	repname(hSQ017893)	-1.9485	-1.24856	0.64078	0.437781	34.9454	60.1536	5.62806	4.3795
hSQ044699	23189	-1.94748	-1.41462	0.726385	0.35758	34.9454	60.1973	6.69322	5.2786
hSQ034607	84245	-1.94586	-0.952709	0.489609	0.520811	34.9454	60.2667	5.37018	4.41747
hSQ025392	60	-1.942	-1.98983	1.02463	0.223693	34.9454	60.4321	8.81255	7.47652
hSQ033466	5888	-1.93877	-0.706083	0.364191	0.612792	34.9454	60.5711	6.99788	6.2918
hSQ038642	389036	-1.93564	-3.84974	1.98887	0.0432471	34.9454	60.7058	11.7312	7.88149
hSQ019042	7003	-1.93545	-1.64403	0.849432	0.296533	34.9454	60.714	5.89627	4.25223
hSQ033261	6428	-1.93408	-1.9286	0.99717	0.239589	34.9454	60.7733	10.1234	8.19483
hSQ025392	60	-1.93043	-1.8446	0.955539	0.258955	34.9454	60.9308	8.81255	7.47652
hSQ006409	9935	-1.92869	-0.873654	0.452978	0.543733	34.9454	61.0063	7.52931	6.65566
hSQ015543	9766	-1.92717	-1.2894	0.669068	0.401367	34.9454	61.0723	5.74111	4.45171
hSQ014819	84230	-1.92647	-1.23296	0.640014	0.417459	34.9454	61.1026	6.87594	5.64297
hSQ021255	51202	-1.92605	-1.22503	0.636031	0.416981	34.9454	61.1206	9.21588	7.99085
hSQ015553	5007	-1.9248	-0.835493	0.434067	0.56316	34.9454	61.1748	8.78822	7.95272
hSQ013541	84451	-1.92475	-0.83544	0.434051	0.558527	34.9454	61.177	3.75505	2.91961
hSQ043075	4774	-1.92349	-0.774221	0.402508	0.585429	34.9454	61.2318	4.9232	4.14898
hSQ019408	7852	-1.92318	-1.75169	0.910831	0.27315	34.9454	61.2451	8.68422	6.93253
hSQ034320	54433	-1.92096	-1.68239	0.875808	0.321048	34.9454	61.3419	7.49847	5.81608
hSQ024766	54813	-1.91823	-1.43904	0.750191	0.381993	34.9454	61.4607	5.74458	4.30554
hSQ005396	4763	-1.91575	-2.1119	1.10239	0.195177	34.9454	61.5689	9.04547	6.93357
hSQ025392	60	-1.91413	-1.86881	0.976324	0.244664	34.9454	61.6396	8.81255	7.47652
hSQ036195	351	-1.91015	-3.87399	2.02811	0.0296402	34.9454	61.8136	12.2828	8.40885
hSQ000228	55153	-1.90831	-0.734629	0.384962	0.600381	34.9454	61.894	7.13338	6.39875
hSQ030930	4836	-1.90742	-1.30121	0.682185	0.404054	34.9454	61.9334	7.54042	6.23921
hSQ025392	60	-1.90622	-1.87687	0.984603	0.242392	34.9454	61.9859	8.81255	7.47652
hSQ027616	10801	-1.90614	-1.53968	0.807749	0.329538	34.9454	61.9896	7.6619	6.12223
hSQ006512	7431	-1.89966	-1.82186	0.959046	0.316896	34.9454	62.2742	10.9522	9.13036
hSQ019018	55765	-1.89698	-1.22964	0.648212	0.41588	34.9454	62.3925	5.7269	4.49726
hSQ025392	60	-1.89408	-1.63484	0.863131	0.301862	34.9454	62.5205	8.81255	7.47652
hSQ001899	10076	-1.89294	-0.72985	0.385565	0.603617	34.9454	62.571	5.86561	5.13576
hSQ002361	10848	-1.89249	-1.66756	0.881148	0.287399	34.9454	62.5907	7.2018	5.53423
hSQ025392	60	-1.88746	-1.80829	0.958053	0.256362	34.9454	62.8135	8.81255	7.47652
hSQ025392	60	-1.88742	-1.91552	1.01489	0.236999	34.9454	62.8152	8.81255	7.47652
hSQ001000	84548	-1.88688	-0.812665	0.430693	0.569032	34.9454	62.8393	5.21456	4.40189
hSQ044417	342945	-1.88607	-1.38632	0.735031	0.366751	34.9454	62.8753	6.17832	4.792
hSQ025392	60	-1.88523	-1.77331	0.94063	0.26571	34.9454	62.9124	8.81255	7.47652
hSQ001120	84976	-1.88289	-0.835816	0.443902	0.55831	34.9454	63.0167	5.84575	5.00993
hSQ006417	351	-1.88181	-2.5063	1.33186	0.13257	34.9454	63.0645	10.1202	7.61394
hSQ025392	60	-1.87566	-1.82929	0.975279	0.255971	34.9454	63.3384	8.81255	7.47652
hSQ044405	391532	-1.8715	-2.75753	1.47343	0.187835	34.9454	63.5244	11.6501	8.89255
hSQ009314	23705	-1.8699	-0.98517	0.526856	0.499089	34.9454	63.5959	7.83646	6.85129
hSQ039990	5546	-1.86884	-0.828837	0.443503	0.566006	34.9454	63.6435	5.86476	5.03592
hSQ019061	1656	-1.86154	-1.15867	0.622426	0.444405	34.9454	63.9711	7.75344	6.59476
hSQ029069	150166	-1.85988	-1.19213	0.640968	0.442739	34.9454	64.0458	7.09046	5.89834
hSQ025011	1982	-1.85818	-1.36212	0.733038	0.378392	34.9454	64.1224	7.56993	6.20781
hSQ008275	9321	-1.85752	-1.23359	0.664109	0.410723	34.9454	64.1523	6.51098	5.27738
hSQ017090	253512	-1.85491	-1.10209	0.594147	0.473501	34.9454	64.27	4.76317	3.66108
hSQ005510	55227	-1.85276	-1.31035	0.707244	0.386788	34.9454	64.3669	5.86511	4.55475
hSQ004905	351	-1.85263	-2.89176	1.56089	0.0841836	34.9454	64.3728	10.8562	7.96443
hSQ025392	60	-1.85119	-1.84877	0.998694	0.25016	34.9454	64.438	8.81255	7.47652
hSQ025392	60	-1.84922	-1.92932	1.04331	0.236274	34.9454	64.527	8.81255	7.47652
hSQ025068	84617	-1.84913	-2.00985	1.08692	0.225561	34.9454	64.5313	9.72039	7.71054
hSQ025392	60	-1.84871	-1.71188	0.925984	0.281415	34.9454	64.5499	8.81255	7.47652
hSQ034174	10521	-1.84861	-0.981655	0.531024	0.500969	34.9454	64.5548	5.40754	4.42588
hSQ026228	1075	-1.84675	-0.846283	0.458256	0.556517	34.9454	64.639	9.20637	8.36008
hSQ025392	60	-1.84389	-1.75715	0.95296	0.267673	34.9454	64.7686	8.81255	7.47652
hSQ018837	55536	-1.84343	-0.969532	0.52594	0.509734	34.9454	64.7896	6.21253	5.24299
hSQ021485	150928	-1.83975	-2.31125	1.25628	0.159462	34.9454	64.9567	8.52933	6.21809
hSQ025392	60	-1.83893	-1.94141	1.05572	0.228677	34.9454	64.9939	8.81255	7.47652
hSQ018372	29956	-1.83727	-1.10119	0.599363	0.459809	34.9454	65.0697	6.20319	5.102
hSQ022881	148867	-1.83721	-0.930953	0.50672	0.522057	34.9454	65.0721	5.58257	4.65162
hSQ025392	60	-1.83501	-1.9111	1.04147	0.239848	34.9454	65.1726	8.81255	7.47652
hSQ021708	114884	-1.83495	-0.877124	0.47801	0.542812	34.9454	65.1754	6.47925	5.60212
hSQ025392	60	-1.83337	-1.95787	1.06791	0.222267	34.9454	65.2475	8.81255	7.47652
hSQ017920	351	-1.8297	-3.65536	1.99779	0.0357652	34.9454	65.4147	11.0179	7.36252
hSQ030037	4363	-1.82632	-0.738486	0.404357	0.599366	34.9454	65.5693	6.50981	5.77133
hSQ025392	60	-1.82038	-1.80396	0.990984	0.258172	34.9454	65.842	8.81255	7.47652
hSQ025392	60	-1.81974	-1.90441	1.04653	0.238026	34.9454	65.8714	8.81255	7.47652
hSQ025392	60	-1.81959	-1.68317	0.925028	0.288237	34.9454	65.8781	8.81255	7.47652
hSQ011761	5324	-1.81733	-0.778122	0.428169	0.584579	34.9454	65.9821	3.51854	2.74042
hSQ037044	10526	-1.8151	-0.899465	0.495547	0.540026	34.9454	66.0846	7.89622	6.99676
hSQ025392	60	-1.81463	-1.79822	0.990959	0.261667	34.9454	66.1063	8.81255	7.47652
hSQ022863	5686	-1.81453	-1.33039	0.733185	0.408508	34.9454	66.1105	8.93362	7.60323
hSQ025392	60	-1.81435	-1.95849	1.07944	0.228376	34.9454	66.1189	8.81255	7.47652
hSQ025392	60	-1.81266	-1.83373	1.01163	0.249624	34.9454	66.197	8.81255	7.47652
hSQ032581	339745	-1.81251	-0.879426	0.485197	0.541655	34.9454	66.2036	3.6567	2.77728
hSQ025392	60	-1.8107	-1.8157	1.00276	0.254459	34.9454	66.2872	8.81255	7.47652
hSQ021145	57556	-1.8101	-0.959569	0.530118	0.511681	34.9454	66.3147	6.65659	5.69702
hSQ025392	60	-1.80754	-1.99017	1.10104	0.21889	34.9454	66.4329	8.81255	7.47652
hSQ011562	55699	-1.80692	-1.20321	0.665891	0.45395	34.9454	66.4619	8.30428	7.10107
hSQ025392	60	-1.80643	-2.05125	1.13553	0.210883	34.9454	66.4843	8.81255	7.47652
hSQ034832	389053	-1.80568	-2.15515	1.19354	0.267813	34.9454	66.5192	12.9118	10.7566
hSQ031651	132001	-1.80497	-0.945869	0.524035	0.513619	34.9454	66.5517	7.2048	6.25893
hSQ025392	60	-1.8048	-1.75759	0.973843	0.266576	34.9454	66.5597	8.81255	7.47652
hSQ010555	2923	-1.80415	-1.56366	0.866703	0.35597	34.9454	66.5898	10.7414	9.17772
hSQ025392	60	-1.80372	-1.72763	0.957813	0.282561	34.9454	66.6095	8.81255	7.47652
hSQ035443	2245	-1.80347	-0.914936	0.507319	0.531181	34.9454	66.6212	5.67548	4.76055
hSQ025392	60	-1.80233	-1.81532	1.00721	0.255194	34.9454	66.674	8.81255	7.47652
hSQ013394	8826	-1.80217	-1.03862	0.576319	0.481326	34.9454	66.6815	5.3231	4.28448
hSQ025392	60	-1.79942	-1.88903	1.0498	0.240657	34.9454	66.8086	8.81255	7.47652
hSQ025392	60	-1.79936	-1.85141	1.02893	0.248911	34.9454	66.8116	8.81255	7.47652
hSQ045349	27242	-1.79866	-0.790128	0.439286	0.579175	34.9454	66.8439	4.27334	3.48321
hSQ005562	26747	-1.79801	-0.898355	0.499639	0.537873	34.9454	66.8744	8.06611	7.16775
hSQ021589	84950	-1.79732	-0.736781	0.409933	0.599674	34.9454	66.9062	5.68942	4.93904
hSQ030753	9815	-1.79542	-0.964412	0.537152	0.505934	34.9454	66.9946	5.72777	4.76335
hSQ029564	78993	-1.79498	-0.979636	0.545764	0.515289	34.9454	67.0148	5.14925	4.16962
hSQ017912	84766::93949	-1.79292	-0.762339	0.425193	0.590336	34.9454	67.1105	4.66904	3.9067
hSQ007184	2070	-1.79097	-1.89197	1.0564	0.23841	34.9454	67.2014	7.1213	5.22933
hSQ025392	60	-1.78879	-1.35861	0.759513	0.371592	34.9454	67.3029	8.81255	7.47652
hSQ025392	60	-1.78819	-1.7821	0.996592	0.260038	34.9454	67.3308	8.81255	7.47652
hSQ025392	60	-1.7855	-1.7715	0.992158	0.264215	34.9454	67.4562	8.81255	7.47652
hSQ025392	60	-1.78302	-1.81189	1.01619	0.25621	34.9454	67.5718	8.81255	7.47652
hSQ025392	60	-1.78274	-1.9422	1.08945	0.231757	34.9454	67.5851	8.81255	7.47652
hSQ030229	79576	-1.7827	-0.912175	0.511682	0.526155	34.9454	67.587	7.05276	6.14059
hSQ021814	5509	-1.78175	-0.899918	0.505076	0.541752	34.9454	67.6314	5.74283	4.84291
hSQ010032	347344	-1.77937	-0.97246	0.54652	0.51534	34.9454	67.7427	5.38958	4.41712
hSQ025392	60	-1.77531	-1.81326	1.02138	0.251941	34.9454	67.9327	8.81255	7.47652
hSQ025392	60	-1.77289	-1.49014	0.840513	0.339639	34.9454	68.0461	8.81255	7.47652
hSQ025392	60	-1.77016	-1.84877	1.04441	0.24702	34.9454	68.1744	8.81255	7.47652
hSQ025392	60	-1.76937	-1.83629	1.03782	0.248843	34.9454	68.2112	8.81255	7.47652
hSQ025392	60	-1.76911	-1.78993	1.01177	0.258241	34.9454	68.2239	8.81255	7.47652
hSQ025392	60	-1.76451	-1.51064	0.856121	0.333329	34.9454	68.4398	8.81255	7.47652
hSQ020626	51684	-1.7636	-1.1149	0.632172	0.457366	34.9454	68.4831	8.16659	7.0517
hSQ025392	60	-1.76359	-1.93685	1.09824	0.225635	34.9454	68.4833	8.81255	7.47652
hSQ025392	60	-1.76003	-1.70598	0.969295	0.277339	34.9454	68.6513	8.81255	7.47652
hSQ025392	60	-1.75917	-1.89293	1.07603	0.237654	34.9454	68.6917	8.81255	7.47652
hSQ025392	60	-1.75895	-1.7923	1.01896	0.25746	34.9454	68.7019	8.81255	7.47652
hSQ025392	60	-1.75665	-1.7215	0.979989	0.271987	34.9454	68.8107	8.81255	7.47652
hSQ025392	60	-1.75145	-1.74627	0.997043	0.268137	34.9454	69.0567	8.81255	7.47652
hSQ025392	60	-1.7468	-1.78909	1.02421	0.259751	34.9454	69.2766	8.81255	7.47652
hSQ025392	60	-1.74555	-1.84316	1.05591	0.243712	34.9454	69.3359	8.81255	7.47652
hSQ030239	351	-1.74242	-2.363	1.35616	0.142521	34.9454	69.4848	9.25374	6.89073
hSQ025392	60	-1.73777	-1.85293	1.06627	0.241923	34.9454	69.7057	8.81255	7.47652
hSQ025392	60	-1.73708	-1.66546	0.958771	0.287056	34.9454	69.7388	8.81255	7.47652
hSQ025392	60	-1.73119	-1.8587	1.07365	0.244352	34.9454	70.0193	8.81255	7.47652
hSQ005369	2241	-1.73022	-0.984646	0.569089	0.504911	34.9454	70.0657	7.8624	6.87775
hSQ025392	60	-1.72833	-1.8233	1.05495	0.248149	34.9454	70.1557	8.81255	7.47652
hSQ030546	83480	-1.72798	-0.954724	0.552508	0.513109	34.9454	70.1723	6.2223	5.26758
hSQ025392	60	-1.72329	-1.8213	1.05687	0.251037	34.9454	70.3964	8.81255	7.47652
hSQ025392	60	-1.72258	-1.66026	0.963821	0.285782	34.9454	70.4304	8.81255	7.47652
hSQ027041	54101	-1.72149	-1.60946	0.93492	0.310271	34.9454	70.4826	7.20761	5.59815
hSQ021589	84950	-1.72092	-0.750383	0.436037	0.593564	34.9454	70.5099	5.68942	4.93904
hSQ025392	60	-1.71975	-1.85197	1.07688	0.241768	34.9454	70.5658	8.81255	7.47652
hSQ032614	23136	-1.71777	-1.02225	0.595105	0.490179	34.9454	70.6608	8.00539	6.98314
hSQ025392	60	-1.71639	-1.7435	1.0158	0.268324	34.9454	70.7268	8.81255	7.47652
hSQ014943	84733	-1.71586	-0.846194	0.493159	0.556283	34.9454	70.752	6.4239	5.5777
hSQ031583	4082	-1.71286	-1.10513	0.645196	0.456354	34.9454	70.896	8.5501	7.44497
hSQ025392	60	-1.71174	-1.77536	1.03717	0.254785	34.9454	70.9497	8.81255	7.47652
hSQ037997	5478	-1.71064	-2.76601	1.61694	0.231424	34.9454	71.0026	11.857	9.09097
hSQ027859	7431	-1.70849	-2.4944	1.46	0.191459	34.9454	71.1055	11.9205	9.42609
hSQ008902	26015	-1.70731	-0.843449	0.494021	0.561147	37.9772	71.1622	7.78142	6.93797
hSQ012564	5888	-1.70603	-0.679184	0.398107	0.624079	37.9772	71.2237	7.28451	6.60533
hSQ025392	60	-1.70572	-1.79752	1.05382	0.254553	37.9772	71.2389	8.81255	7.47652
hSQ011979	60	-1.70512	-2.19806	1.2891	0.179776	37.9772	71.2678	10.347	8.14899
hSQ011128	54665	-1.70467	-1.54732	0.907699	0.334267	37.9772	71.2894	6.81179	5.26447
hSQ025392	60	-1.70337	-1.949	1.1442	0.227629	37.9772	71.3517	8.81255	7.47652
hSQ025392	60	-1.6986	-1.77055	1.04236	0.260413	37.9772	71.5812	8.81255	7.47652
hSQ025392	60	-1.69643	-1.6779	0.989074	0.27824	37.9772	71.6856	8.81255	7.47652
hSQ025392	60	-1.69414	-1.78484	1.05354	0.254138	37.9772	71.7959	8.81255	7.47652
hSQ014096	3303	-1.69142	-1.53134	0.90536	0.314921	37.9772	71.9274	11.0275	9.49618
hSQ025392	60	-1.69115	-1.8045	1.06703	0.254498	37.9772	71.9404	8.81255	7.47652
hSQ025392	60	-1.6904	-1.94395	1.14999	0.219484	37.9772	71.9762	8.81255	7.47652
hSQ024043	10163	-1.68991	-1.15317	0.682382	0.446004	37.9772	71.9999	5.80675	4.65358
hSQ013993	7112	-1.68623	-1.70368	1.01035	0.278015	37.9772	72.1776	8.72317	7.01949
hSQ025392	60	-1.68605	-1.74609	1.0356	0.264071	37.9772	72.1862	8.81255	7.47652
hSQ021443	7534	-1.68522	-1.78274	1.05787	0.258928	37.9772	72.2265	8.48812	7.56359
hSQ024161	79080	-1.68493	-1.03194	0.612453	0.477375	37.9772	72.2402	7.40454	6.3726
hSQ015905	84236	-1.68472	-0.855346	0.507707	0.55608	37.9772	72.2504	5.79772	4.94237
hSQ025392	60	-1.6827	-1.6838	1.00065	0.279361	37.9772	72.3481	8.81255	7.47652
hSQ025392	60	-1.68106	-1.58494	0.942822	0.302837	37.9772	72.4275	8.81255	7.47652
hSQ025392	60	-1.68037	-1.40781	0.837799	0.355866	37.9772	72.4608	8.81255	7.47652
hSQ025392	60	-1.67793	-1.80068	1.07316	0.255265	37.9772	72.579	8.81255	7.47652
hSQ001998	440085	-1.67355	-2.03725	1.21732	0.204744	37.9772	72.7906	7.57465	5.5374
hSQ025392	60	-1.67287	-1.66843	0.997348	0.280628	37.9772	72.8235	8.81255	7.47652
hSQ025392	60	-1.67092	-1.49128	0.892491	0.329407	37.9772	72.9181	8.81255	7.47652
hSQ021443	7534	-1.67016	-1.57396	0.942398	0.307275	37.9772	72.9547	8.48812	7.56359
hSQ012802	2256	-1.66904	-0.586283	0.35127	0.666002	37.9772	73.0091	5.0242	4.43791
hSQ038600	6129	-1.6687	-2.06784	1.23919	0.276649	37.9772	73.0254	9.38322	7.31538
hSQ032961	11104	-1.66796	-0.955372	0.57278	0.514114	37.9772	73.0615	6.55651	5.60114
hSQ025392	60	-1.66526	-1.68645	1.01272	0.27509	37.9772	73.1923	8.81255	7.47652
hSQ021443	7534	-1.66518	-1.61039	0.967096	0.296767	37.9772	73.1958	8.48812	7.56359
hSQ025392	60	-1.66372	-1.83411	1.10242	0.240664	37.9772	73.267	8.81255	7.47652
hSQ013845	353189	-1.66262	-1.04862	0.630705	0.478114	37.9772	73.3202	6.37411	5.32549
hSQ025392	60	-1.66024	-1.80076	1.08464	0.252025	37.9772	73.4354	8.81255	7.47652
hSQ045255	10953	-1.66011	-0.720329	0.433905	0.606338	37.9772	73.4419	6.01717	5.29684
hSQ027685	7813	-1.65912	-0.834577	0.503023	0.56797	37.9772	73.4898	5.38266	4.54808
hSQ025392	60	-1.6577	-1.81274	1.09353	0.249375	37.9772	73.5587	8.81255	7.47652
hSQ006122	5187	-1.6568	-0.756339	0.456506	0.593352	37.9772	73.6025	7.70411	6.94777
hSQ003919	84826	-1.65556	-0.98129	0.592726	0.496713	37.9772	73.6628	4.84542	3.86413
hSQ003066	51244	-1.65534	-0.826431	0.499253	0.562494	37.9772	73.6735	5.72691	4.90048
hSQ025392	60	-1.65522	-1.74549	1.05454	0.261554	37.9772	73.6794	8.81255	7.47652
hSQ025392	60	-1.6548	-1.7921	1.08297	0.250034	37.9772	73.6995	8.81255	7.47652
hSQ001978	81562	-1.65306	-0.951102	0.575358	0.511337	37.9772	73.784	6.18584	5.23474
hSQ001462	3308	-1.65158	-1.97647	1.19671	0.229111	37.9772	73.856	13.3451	11.3687
hSQ021443	7534	-1.64926	-1.42307	0.862854	0.353986	37.9772	73.9685	8.48812	7.56359
hSQ025392	60	-1.64628	-1.65248	1.00377	0.283588	37.9772	74.1133	8.81255	7.47652
hSQ025392	60	-1.64465	-1.8099	1.10048	0.252768	37.9772	74.1925	8.81255	7.47652
hSQ017561	8992	-1.63885	-0.909015	0.554666	0.530577	37.9772	74.4743	4.55202	3.64301
hSQ025392	60	-1.63672	-1.74003	1.06312	0.263992	37.9772	74.5779	8.81255	7.47652
hSQ025392	60	-1.63655	-1.69379	1.03497	0.275899	37.9772	74.5861	8.81255	7.47652
hSQ025392	60	-1.63487	-1.88707	1.15427	0.227947	37.9772	74.668	8.81255	7.47652
hSQ026407	3308	-1.63304	-1.20247	0.736336	0.432203	37.9772	74.7567	12.0812	10.8787
hSQ000012	55100	-1.62954	-0.767535	0.471013	0.58535	37.9772	74.9272	8.55297	7.78544
hSQ012464	84656	-1.6288	-0.965451	0.592739	0.503865	37.9772	74.9634	6.9679	6.00245
hSQ018152	6389	-1.62832	-1.27998	0.786071	0.395105	37.9772	74.9863	9.31541	8.03543
hSQ039131	8087	-1.62832	-1.331	0.817407	0.396133	37.9772	74.9866	7.69904	6.36804
hSQ025392	60	-1.6281	-1.89647	1.16484	0.231353	37.9772	74.9975	8.81255	7.47652
hSQ039029	81788	-1.62789	-1.0937	0.671851	0.4564	37.9772	75.0074	7.24866	6.15496
hSQ025392	60	-1.62724	-1.83041	1.12485	0.247605	37.9772	75.0391	8.81255	7.47652
hSQ003631	125476	-1.62644	-0.733525	0.451	0.599402	37.9772	75.0779	5.9806	5.24708
hSQ025392	60	-1.62633	-1.82722	1.12352	0.243482	37.9772	75.0834	8.81255	7.47652
hSQ025392	60	-1.62547	-1.64516	1.01211	0.284369	37.9772	75.1251	8.81255	7.47652
hSQ023113	51621	-1.62532	-0.68604	0.422094	0.620575	37.9772	75.1323	5.35795	4.67191
hSQ017595	7090	-1.62452	-0.721226	0.443964	0.606435	37.9772	75.1717	7.54751	6.82629
hSQ010862	677	-1.62369	-1.1137	0.685907	0.453258	37.9772	75.2117	5.36104	4.24734
hSQ011105	repname(hSQ011105)	-1.6213	-1.45951	0.900206	0.355524	37.9772	75.328	5.71969	4.26019
hSQ033165	79080	-1.62109	-0.827507	0.510463	0.558253	37.9772	75.3383	7.09498	6.26747
hSQ037174	6774	-1.61806	-1.36474	0.84344	0.378138	37.9772	75.4859	8.63837	7.27363
hSQ019726	9645	-1.61768	-1.07626	0.665314	0.461978	37.9772	75.5045	6.12757	5.05131
hSQ025392	60	-1.61747	-1.85884	1.14923	0.233763	37.9772	75.5147	8.81255	7.47652
hSQ025392	60	-1.61661	-1.66435	1.02953	0.279855	37.9772	75.5565	8.81255	7.47652
hSQ003657	488	-1.61418	-0.758256	0.469747	0.589832	37.9772	75.6748	7.68332	6.92507
hSQ017835	25980	-1.61372	-0.987315	0.611827	0.493368	37.9772	75.6972	7.71284	6.72553
hSQ011331	4651	-1.61323	-1.39114	0.862333	0.353002	37.9772	75.7211	8.21247	6.82133
hSQ025392	60	-1.61221	-1.52978	0.948874	0.315559	37.9772	75.7708	8.81255	7.47652
hSQ041537	5888	-1.61203	-0.879157	0.545372	0.539569	37.9772	75.7793	7.509	6.62984
hSQ009987	112	-1.6117	-0.834058	0.517503	0.556589	37.9772	75.7956	5.66502	4.83097
hSQ025392	60	-1.61118	-1.67434	1.0392	0.279439	37.9772	75.8205	8.81255	7.47652
hSQ025392	60	-1.60937	-1.75661	1.09149	0.259486	37.9772	75.9088	8.81255	7.47652
hSQ025392	60	-1.60766	-1.82594	1.13578	0.244311	37.9772	75.9921	8.81255	7.47652
hSQ025392	60	-1.60404	-1.59593	0.994943	0.298805	37.9772	76.1682	8.81255	7.47652
hSQ020535	3839	-1.60336	-1.02149	0.637092	0.480526	37.9772	76.2012	8.17402	7.15253
hSQ032288	84976	-1.60206	-1.02519	0.63992	0.476957	37.9772	76.2648	6.16572	5.14053
hSQ006570	90529	-1.60007	-0.608513	0.380304	0.65555	37.9772	76.3615	5.78708	5.17856
hSQ027772	84858	-1.59979	-0.897888	0.561254	0.528634	37.9772	76.3752	9.76057	8.86268
hSQ003118	55227	-1.59914	-1.60923	1.00631	0.323411	37.9772	76.4066	5.2288	3.61957
hSQ008543	8826	-1.59744	-1.44887	0.906996	0.354351	37.9772	76.4896	5.90216	4.45329
hSQ028485	7078	-1.59625	-0.759824	0.476005	0.591401	37.9772	76.5473	6.5275	5.76768
hSQ043542	125476	-1.59334	-1.10092	0.690947	0.457009	37.9772	76.6888	5.97316	4.87225
hSQ007445	55571	-1.59102	-0.923705	0.580574	0.532586	37.9772	76.8017	6.60986	5.68615
hSQ005078	23648	-1.59054	-0.995823	0.62609	0.509996	37.9772	76.8251	6.36318	5.36736
hSQ025392	60	-1.58865	-1.67001	1.05121	0.278899	37.9772	76.917	8.81255	7.47652
hSQ010319	9188	-1.5858	-0.97616	0.615563	0.507214	44.1162	77.0558	12.1316	11.1554
hSQ025392	60	-1.58433	-1.45486	0.918279	0.327986	44.1162	77.1272	8.81255	7.47652
hSQ032607	894	-1.58189	-1.67324	1.05775	0.271397	44.1162	77.2461	7.48471	5.81147
hSQ030603	84079	-1.58082	-0.897953	0.568029	0.532527	44.1162	77.2977	4.87862	3.98067
hSQ012413	94241	-1.57929	-0.953547	0.603781	0.506476	44.1162	77.3722	4.79611	3.84256
hSQ025392	60	-1.57844	-1.82386	1.15548	0.24	44.1162	77.4138	8.81255	7.47652
hSQ005481	60	-1.57587	-1.47712	0.937335	0.330463	44.1162	77.5385	8.67267	7.19555
hSQ025392	60	-1.57499	-1.67764	1.06518	0.274717	44.1162	77.5814	8.81255	7.47652
hSQ043251	22865	-1.57157	-1.00007	0.636353	0.502187	44.1162	77.7476	6.12145	5.12138
hSQ025890	9667	-1.57013	-1.10568	0.704195	0.444816	44.1162	77.8173	8.23086	7.12518
hSQ027469	1017	-1.57008	-0.698268	0.444733	0.61743	44.1162	77.8196	6.6521	5.95384
hSQ023379	10622	-1.56895	-1.09948	0.700773	0.454266	44.1162	77.8748	5.90139	4.80192
hSQ025392	60	-1.56768	-1.64506	1.04936	0.281752	44.1162	77.9363	8.81255	7.47652
hSQ038608	55707	-1.56649	-1.13248	0.722939	0.443013	44.1162	77.9939	5.68157	4.54909
hSQ038281	10049	-1.56244	-0.902767	0.577791	0.536344	44.1162	78.1904	8.18828	7.28552
hSQ022995	200014	-1.56017	-1.25095	0.801803	0.40053	44.1162	78.3005	5.68159	4.43064
hSQ038897	163	-1.55984	-2.03078	1.30192	0.208152	44.1162	78.3167	9.32332	7.29254
hSQ030533	157708	-1.55979	-0.99156	0.635702	0.491146	44.1162	78.3192	6.67779	5.68623
hSQ001726	6130	-1.55961	-1.85248	1.18778	0.345482	44.1162	78.3277	8.50028	6.6478
hSQ025392	60	-1.55745	-1.83152	1.17597	0.238003	44.1162	78.4327	8.81255	7.47652
hSQ039661	5033	-1.55738	-0.910154	0.584412	0.541932	44.1162	78.4358	6.64164	5.73149
hSQ009749	58513	-1.55576	-0.68339	0.439263	0.625953	44.1162	78.5143	8.0237	7.34031
hSQ025392	60	-1.55531	-1.66274	1.06907	0.278111	44.1162	78.5361	8.81255	7.47652
hSQ027209	9341	-1.55493	-0.956869	0.615379	0.513625	44.1162	78.5549	3.55155	2.59468
hSQ038066	123169	-1.55486	-1.44564	0.929758	0.346251	44.1162	78.5581	9.21887	7.77323
hSQ037426	51319	-1.55294	-0.894437	0.575963	0.533647	44.1162	78.651	6.35423	5.4598
hSQ025944	7565	-1.55206	-0.73392	0.472869	0.599485	44.1162	78.6938	4.73821	4.00429
hSQ025392	60	-1.55143	-1.81065	1.16709	0.245368	44.1162	78.7244	8.81255	7.47652
hSQ006868	5326	-1.55132	-0.615062	0.396476	0.654153	44.1162	78.7294	4.20615	3.59109
hSQ011135	1718	-1.54982	-0.956873	0.61741	0.5179	44.1162	78.8024	8.03213	7.07526
hSQ029329	182	-1.54718	-1.18738	0.767448	0.420305	44.1162	78.9299	6.49181	5.30443
hSQ035089	64089	-1.54654	-0.766919	0.495894	0.586887	44.1162	78.961	3.75223	2.98531
hSQ006935	3925	-1.54596	-1.75235	1.1335	0.257281	44.1162	78.9889	9.56154	7.80919
hSQ033791	64927	-1.5448	-0.719923	0.466032	0.604202	44.1162	79.0453	5.46998	4.75006
hSQ025392	60	-1.54345	-1.61211	1.04449	0.289962	44.1162	79.1103	8.81255	7.47652
hSQ014058	3162	-1.54158	-0.888901	0.576616	0.533038	44.1162	79.2007	7.28025	6.39135
hSQ004527	166929	-1.54039	-1.0744	0.697487	0.465069	44.1162	79.2584	5.47291	4.39851
hSQ011483	10087	-1.54016	-0.989084	0.642196	0.496418	44.1162	79.2695	7.48492	6.49583
hSQ037317	57198	-1.54015	-1.04567	0.678936	0.474616	44.1162	79.2697	4.83016	3.78449
hSQ005898	2773	-1.53941	-1.16257	0.755202	0.423566	44.1162	79.3056	8.16193	6.99937
hSQ038488	831	-1.53887	-0.765206	0.497253	0.586782	44.1162	79.3319	5.94513	5.17992
hSQ032750	7431	-1.53843	-2.3938	1.55601	0.298417	44.1162	79.3532	12.6263	10.2325
hSQ020949	5573	-1.53762	-1.35373	0.880407	0.360748	44.1162	79.3921	9.27111	7.91738
hSQ025392	60	-1.53756	-1.29949	0.845166	0.37598	44.1162	79.395	8.81255	7.47652
hSQ024541	142	-1.53688	-1.2192	0.793292	0.416996	44.1162	79.4278	10.71	9.49078
hSQ032195	1350	-1.53481	-0.694523	0.452513	0.621082	44.1162	79.5276	6.08521	5.39068
hSQ025392	60	-1.53434	-1.56486	1.01989	0.299741	44.1162	79.5506	8.81255	7.47652
hSQ024004	161424	-1.53262	-1.23892	0.808372	0.413803	44.1162	79.6337	8.71047	7.47154
hSQ020625	5514	-1.53203	-1.02994	0.672271	0.47277	44.1162	79.662	7.42301	6.39307
hSQ002278	10664	-1.53074	-1.01768	0.664831	0.478849	44.1162	79.7242	9.13799	8.12031
hSQ034778	126917	-1.53003	-0.899037	0.587593	0.544396	44.1162	79.7583	8.14482	7.24578
hSQ009588	63874	-1.52977	-0.92534	0.604889	0.536384	44.1162	79.771	6.21696	5.29162
hSQ025392	60	-1.52941	-1.65918	1.08485	0.281982	44.1162	79.7884	8.81255	7.47652
hSQ027608	57523	-1.5225	-1.61288	1.05936	0.312086	44.1162	80.1213	6.94599	5.33312
hSQ000702	5937	-1.52247	-1.12207	0.737007	0.451555	44.1162	80.1226	6.82185	5.69978
hSQ041891	144108	-1.52141	-0.811631	0.533474	0.568982	44.1162	80.1738	6.92556	6.11393
hSQ009110	56905	-1.52076	-0.870549	0.572444	0.555984	44.1162	80.2049	7.27225	6.4017
hSQ000817	5587	-1.52062	-1.17407	0.772097	0.429958	44.1162	80.2114	7.41057	6.2365
hSQ028589	1182	-1.52022	-0.746768	0.491222	0.591374	44.1162	80.2306	6.13579	5.38902
hSQ045475	repname(hSQ045475)	-1.51726	-0.71602	0.471916	0.607845	44.1162	80.373	6.1851	5.46907
hSQ022206	10241	-1.51726	-0.967068	0.637377	0.505579	44.1162	80.373	6.9854	6.01834
hSQ027037	54890	-1.51307	-1.04749	0.692293	0.497528	44.1162	80.5743	5.7322	4.68471
hSQ007222	2975	-1.50974	-0.651304	0.431401	0.636424	44.1162	80.7341	7.13086	6.47956
hSQ032444	51363	-1.50835	-0.647925	0.429559	0.637469	44.1162	80.8007	5.236	4.58807
hSQ007108	22948	-1.50352	-2.2951	1.52648	0.226883	44.1162	81.0319	14.1433	11.8482
hSQ034591	64207	-1.50238	-0.801945	0.533783	0.579459	44.1162	81.0867	6.67841	5.87646
hSQ025392	60	-1.50179	-1.40811	0.937619	0.350419	48.6432	81.1146	8.81255	7.47652
hSQ029336	7743	-1.50001	-0.626591	0.417725	0.648267	48.6432	81.2	4.97529	4.34869
hSQ003224	9077	-1.49808	-1.46995	0.981226	0.318129	48.6432	81.2922	8.79122	7.32127
hSQ038023	1479	-1.49741	-0.833685	0.556753	0.561155	48.6432	81.3244	8.02686	7.19318
hSQ025035	284695	-1.49654	-1.0367	0.692731	0.470991	48.6432	81.3658	8.05987	7.02317
hSQ021443	7534	-1.49484	-1.6484	1.10272	0.278168	48.6432	81.4466	8.48812	7.56359
hSQ025392	60	-1.49413	-1.30359	0.872475	0.373998	48.6432	81.4809	8.81255	7.47652
hSQ021901	2683	-1.49143	-1.29582	0.868841	0.378618	48.6432	81.6093	5.58044	4.28462
hSQ017607	116039	-1.48838	-0.724981	0.487094	0.609764	48.6432	81.7547	5.43862	4.71364
hSQ043719	4082	-1.48729	-1.08225	0.727666	0.452379	48.6432	81.8067	8.50751	7.42526
hSQ025392	60	-1.48615	-1.39683	0.939899	0.345659	48.6432	81.861	8.81255	7.47652
hSQ033698	5534	-1.48278	-2.96588	2.00022	0.0764244	48.6432	82.0214	7.98112	5.01523
hSQ025392	60	-1.48088	-1.60511	1.08389	0.298812	48.6432	82.1115	8.81255	7.47652
hSQ036452	286046	-1.48027	-0.808821	0.5464	0.568644	48.6432	82.1403	5.488	4.67918
hSQ021443	7534	-1.47964	-1.58382	1.07042	0.287289	48.6432	82.1704	8.48812	7.56359
hSQ004042	7112	-1.4792	-1.44328	0.975716	0.335481	48.6432	82.1912	8.85549	7.41222
hSQ037596	468	-1.47851	-1.12438	0.760481	0.456117	48.6432	82.2237	5.98946	4.86508
hSQ031998	51118	-1.47819	-0.678213	0.458813	0.62411	48.6432	82.239	7.89419	7.21598
hSQ025392	60	-1.47773	-1.52379	1.03117	0.307038	48.6432	82.261	8.81255	7.47652
hSQ021443	7534	-1.47592	-1.49407	1.0123	0.319048	48.6432	82.3468	8.48812	7.56359
hSQ025392	60	-1.47562	-1.64658	1.11585	0.277764	48.6432	82.3607	8.81255	7.47652
hSQ016249	5916	-1.4748	-0.889131	0.602881	0.530159	48.6432	82.3995	3.65812	2.76899
hSQ008004	3308	-1.47477	-1.60225	1.08644	0.352896	48.6432	82.4009	13.0678	11.4656
hSQ025392	60	-1.47436	-1.57961	1.07139	0.293791	48.6432	82.4206	8.81255	7.47652
hSQ038239	80024	-1.47314	-1.05549	0.716488	0.463264	48.6432	82.4782	5.30888	4.25339
hSQ025392	60	-1.47124	-1.42907	0.971339	0.340943	48.6432	82.5682	8.81255	7.47652
hSQ026468	8495	-1.47103	-1.44009	0.978962	0.328679	48.6432	82.5779	6.1985	4.75841
hSQ009033	91663	-1.47062	-1.32695	0.902306	0.361414	48.6432	82.5972	7.86232	6.53537
hSQ025392	60	-1.46876	-1.45721	0.992133	0.327959	48.6432	82.6852	8.81255	7.47652
hSQ021443	7534	-1.46667	-1.55409	1.05961	0.298545	48.6432	82.7843	8.48812	7.56359
hSQ012581	22948	-1.46639	-1.74926	1.1929	0.33169	48.6432	82.7973	12.3905	10.6413
hSQ008863	440577	-1.4658	-1.95393	1.33301	0.254556	48.6432	82.825	11.832	9.87806
hSQ042424	1265	-1.46515	-0.683434	0.466461	0.622231	48.6432	82.856	5.94293	5.2595
hSQ019402	56650	-1.46337	-0.757005	0.517304	0.585243	48.6432	82.9398	3.90162	3.14461
hSQ041172	4926	-1.46308	-0.683926	0.467455	0.620926	48.6432	82.9532	6.7392	6.05527
hSQ018572	1477	-1.46198	-0.915407	0.626144	0.523647	48.6432	83.0054	7.95137	7.03597
hSQ028836	9411	-1.46102	-1.38023	0.944703	0.378687	48.6432	83.0503	5.72617	4.34594
hSQ027656	999	-1.4591	-0.995	0.681927	0.492079	48.6432	83.1407	8.87668	7.88168
hSQ004021	125950	-1.45898	-0.823762	0.564614	0.569596	48.6432	83.1463	7.20444	6.38067
hSQ021443	7534	-1.45873	-1.51742	1.04023	0.307188	48.6432	83.158	8.48812	7.56359
hSQ035864	79571	-1.45817	-0.633934	0.434746	0.642875	48.6432	83.1844	6.25172	5.61779
hSQ021443	7534	-1.45746	-1.57126	1.07808	0.293155	48.6432	83.2179	8.48812	7.56359
hSQ038274	124637	-1.45497	-0.78572	0.540025	0.581013	48.6432	83.3348	5.0681	4.28238
hSQ012691	23379	-1.45451	-0.750839	0.516214	0.587778	48.6432	83.3563	6.51582	5.76498
hSQ021443	7534	-1.45412	-1.5432	1.06126	0.299781	48.6432	83.3749	8.48812	7.56359
hSQ006722	26574	-1.45262	-0.899675	0.619346	0.548907	48.6432	83.445	9.12425	8.22457
hSQ011517	8394	-1.4526	-2.16533	1.49066	0.171304	48.6432	83.446	7.87482	5.70948
hSQ025392	60	-1.45235	-1.52189	1.04788	0.327051	48.6432	83.4578	8.81255	7.47652
hSQ025392	60	-1.44942	-1.42987	0.986511	0.345813	48.6432	83.5948	8.81255	7.47652
hSQ034966	8886	-1.44925	-0.753033	0.5196	0.600825	48.6432	83.6028	9.23492	8.48189
hSQ007219	51253	-1.44743	-0.944534	0.652558	0.506179	48.6432	83.688	6.09367	5.14914
hSQ018897	29128	-1.44631	-1.79372	1.24021	0.246554	48.6432	83.7407	10.2187	8.42499
hSQ041811	10461	-1.44501	-0.721124	0.499043	0.602728	48.6432	83.8011	6.93792	6.21679
hSQ025392	60	-1.44398	-1.32524	0.917765	0.365036	48.6432	83.8492	8.81255	7.47652
hSQ009933	351	-1.44258	-1.4448	1.00154	0.330995	48.6432	83.9145	8.44705	7.00225
hSQ021443	7534	-1.44255	-1.70157	1.17956	0.261733	48.6432	83.9163	8.48812	7.56359
hSQ025233	540	-1.44227	-0.660116	0.457693	0.634244	48.6432	83.9292	7.16722	6.5071
hSQ022798	6790	-1.43989	-0.697233	0.484226	0.620574	48.6432	84.0401	9.09496	8.39773
hSQ011066	2098	-1.43966	-0.755669	0.524893	0.588591	48.6432	84.0508	9.49726	8.74159
hSQ037595	8895	-1.43792	-1.92659	1.33984	0.246368	51.1508	84.132	11.3948	9.46823
hSQ030970	387924	-1.43757	-0.761984	0.530051	0.594035	51.1508	84.1483	7.61497	6.85299
hSQ026796	10580	-1.43703	-1.81622	1.26387	0.222813	51.1508	84.1731	8.52305	6.70683
hSQ025392	60	-1.43544	-1.31189	0.913925	0.380422	51.1508	84.2471	8.81255	7.47652
hSQ021824	223	-1.43541	-1.00874	0.702758	0.491392	51.1508	84.2488	10.7295	9.72079
hSQ021443	7534	-1.43507	-1.63207	1.13727	0.277228	51.1508	84.2644	8.48812	7.56359
hSQ024286	23196	-1.43448	-1.02468	0.714323	0.482618	51.1508	84.2918	6.10626	5.08157
hSQ025392	60	-1.4343	-1.56462	1.09086	0.294723	51.1508	84.3003	8.81255	7.47652
hSQ017020	80742	-1.43288	-0.699531	0.488198	0.617588	51.1508	84.366	5.4273	4.72777
hSQ044855	10471	-1.4317	-1.10915	0.774707	0.448503	51.1508	84.4209	5.80725	4.69811
hSQ011189	90861	-1.43015	-0.811359	0.567325	0.561005	51.1508	84.4929	5.40987	4.59851
hSQ021443	7534	-1.42724	-1.66355	1.16557	0.267097	51.1508	84.6273	8.48812	7.56359
hSQ027329	125476	-1.42687	-0.793756	0.55629	0.568257	51.1508	84.6445	5.89973	5.10597
hSQ005039	7431	-1.42603	-2.43532	1.70776	0.137254	51.1508	84.6833	14.5414	12.106
hSQ038391	7979	-1.42351	-0.773283	0.543221	0.581991	51.1508	84.7997	5.22655	4.45327
hSQ039720	5757::326626	-1.42273	-1.46295	1.02827	0.377	51.1508	84.836	7.62971	6.16677
hSQ016087	219699	-1.42206	-0.772149	0.542978	0.578607	51.1508	84.8667	6.588	5.81585
hSQ029110	2719	-1.42181	-1.02396	0.720184	0.470114	51.1508	84.8785	9.14556	8.12159
hSQ014080	7335	-1.42145	-1.12355	0.790425	0.450504	51.1508	84.8951	6.1318	5.00826
hSQ025392	60	-1.42124	-1.5772	1.10974	0.290134	51.1508	84.9045	8.81255	7.47652
hSQ019847	1355	-1.41833	-0.919532	0.64832	0.515733	51.1508	85.0387	7.86892	6.94938
hSQ010912	6613	-1.41803	-0.938206	0.661626	0.506003	51.1508	85.0525	5.66105	4.72285
hSQ022142	23598	-1.41734	-0.952243	0.671853	0.500827	51.1508	85.0844	7.89389	6.94165
hSQ038377	5606	-1.41619	-0.775825	0.547827	0.578837	51.1508	85.1373	5.04091	4.26509
hSQ025392	60	-1.41459	-1.7599	1.24411	0.243752	51.1508	85.2109	8.81255	7.47652
hSQ040668	55227	-1.4136	-1.17027	0.827863	0.472319	51.1508	85.2561	6.27038	5.10011
hSQ017893	repname(hSQ017893)	-1.41163	-1.5867	1.12402	0.425302	51.1508	85.3468	5.62806	4.3795
hSQ033131	6827	-1.40976	-0.86635	0.614539	0.555615	51.1508	85.4325	4.90425	4.0379
hSQ022203	6191	-1.40965	-2.42375	1.7194	0.347263	51.1508	85.4375	10.8725	8.44874
hSQ005544	4869	-1.40931	-3.73828	2.65256	0.0738185	51.1508	85.4528	14.1328	10.3945
hSQ019343	23229	-1.40781	-0.67884	0.482195	0.620323	51.1508	85.5215	5.26498	4.58614
hSQ008017	29121	-1.40619	-1.83493	1.30489	0.279856	51.1508	85.5955	11.1456	9.31069
hSQ035217	387703::148854	-1.40567	-1.6713	1.18897	0.259528	51.1508	85.6195	7.55939	5.88809
hSQ025392	60	-1.40551	-1.47601	1.05016	0.324294	51.1508	85.6267	8.81255	7.47652
hSQ038017	6389	-1.40471	-0.799497	0.569152	0.587291	51.1508	85.663	8.48244	7.96853
hSQ013249	51388	-1.39842	-0.953166	0.6816	0.499762	51.1508	85.9495	6.09468	5.14151
hSQ008628	6207	-1.39738	-2.12322	1.51943	0.292955	51.1508	85.9971	8.7567	6.63348
hSQ011606	342538	-1.39473	-3.43457	2.46254	0.0276176	51.1508	86.1172	8.97873	5.54415
hSQ016484	6194	-1.39424	-2.7917	2.00231	0.3229	51.1508	86.1395	10.5109	7.71917
hSQ033583	6929	-1.39233	-0.760301	0.546064	0.583867	51.1508	86.226	4.9601	4.1998
hSQ037578	85450	-1.39132	-0.59791	0.429744	0.661635	51.1508	86.2719	6.9991	6.40119
hSQ017305	9945	-1.39051	-1.53561	1.10435	0.319536	51.1508	86.3085	6.29746	4.76186
hSQ005668	11040	-1.38862	-0.878731	0.632809	0.529707	51.1508	86.3937	5.80262	4.92389
hSQ005754	23774	-1.386	-0.744682	0.537287	0.60649	51.1508	86.5117	6.37533	5.63065
hSQ025392	60	-1.38577	-1.49487	1.07873	0.322337	51.1508	86.5221	8.81255	7.47652
hSQ032203	6830	-1.38553	-0.78316	0.565241	0.573968	51.1508	86.533	7.70997	6.92681
hSQ021443	7534	-1.3848	-1.58242	1.14271	0.287096	51.1508	86.5661	8.48812	7.56359
hSQ025392	60	-1.38453	-1.60534	1.15949	0.277265	51.1508	86.5782	8.81255	7.47652
hSQ025392	60	-1.38389	-1.69755	1.22665	0.254654	51.1508	86.6071	8.81255	7.47652
hSQ007726	4642	-1.3837	-0.894542	0.646484	0.521697	51.1508	86.6154	9.4069	8.51236
hSQ043680	157378	-1.38259	-1.97601	1.4292	0.180393	51.1508	86.6652	5.95935	3.98334
hSQ001859	54856	-1.38187	-0.676469	0.489532	0.624855	51.1508	86.6979	6.74016	6.06369
hSQ041148	6170	-1.37975	-1.33645	0.968618	0.390285	51.1508	86.7931	5.57292	4.23647
hSQ014430	10262	-1.37671	-0.696388	0.505836	0.618817	56.6929	86.9294	7.84395	7.14757
hSQ021327	55230	-1.37615	-0.764753	0.555717	0.580174	56.6929	86.9541	5.14774	4.38298
hSQ043744	2137	-1.37582	-0.586287	0.426137	0.666177	56.6929	86.9692	5.76973	5.18344
hSQ039448	6949	-1.37534	-0.677709	0.492758	0.624493	56.6929	86.9906	8.76301	8.0853
hSQ007073	54058	-1.37524	-1.04984	0.76339	0.492538	56.6929	86.9952	6.16902	5.11918
hSQ007974	6421	-1.37313	-1.86795	1.36036	0.233059	56.6929	87.0891	13.7166	11.8487
hSQ027859	7431	-1.37254	-2.32115	1.69113	0.136914	56.6929	87.1156	11.9205	9.42609
hSQ002717	22938	-1.3717	-0.931273	0.678919	0.53237	56.6929	87.1531	9.89169	8.96042
hSQ025389	10758	-1.37165	-1.14599	0.835481	0.431849	56.6929	87.1552	6.96884	5.82285
hSQ000252	1355	-1.3688	-0.701949	0.512821	0.613398	56.6929	87.2822	7.22722	6.52527
hSQ035683	7536	-1.36845	-0.819137	0.598585	0.575994	56.6929	87.2976	6.8866	6.06746
hSQ018279	25830	-1.36775	-0.612103	0.447524	0.656069	56.6929	87.3289	4.34503	3.73293
hSQ016413	5130	-1.36686	-0.66681	0.48784	0.625053	56.6929	87.3685	7.02031	6.3535
hSQ027093	150209	-1.36626	-2.88985	2.11515	0.186974	56.6929	87.3952	10.6127	7.7229
hSQ021557	8087	-1.36521	-0.741932	0.543457	0.604683	56.6929	87.4418	7.41066	6.66872
hSQ025713	2114	-1.36288	-0.703869	0.516456	0.616024	56.6929	87.5449	6.57442	5.87055
hSQ025392	60	-1.36265	-1.64862	1.20986	0.265864	56.6929	87.5553	8.81255	7.47652
hSQ012612	160335	-1.36197	-2.28064	1.67452	0.119983	56.6929	87.5856	6.17046	3.88982
hSQ001256	54888	-1.35948	-1.01728	0.748288	0.497235	56.6929	87.6955	9.67876	8.66148
hSQ008119	9772	-1.35938	-0.716699	0.527226	0.603458	56.6929	87.7	5.01979	4.30309
hSQ006481	7565	-1.35844	-0.6154	0.45302	0.653397	56.6929	87.7414	4.67621	4.06081
hSQ029136	57343	-1.35724	-0.529201	0.389909	0.692076	56.6929	87.7942	5.46552	4.93632
hSQ013699	55689	-1.35701	-0.647119	0.476872	0.634407	56.6929	87.8045	5.70204	5.05492
hSQ005688	351	-1.35651	-1.24344	0.916649	0.396135	56.6929	87.8266	8.66903	7.42559
hSQ025392	60	-1.35629	-1.61085	1.18769	0.272961	56.6929	87.8363	8.81255	7.47652
hSQ025392	60	-1.35526	-1.41603	1.04484	0.362217	56.6929	87.8816	8.81255	7.47652
hSQ032789	22919	-1.35468	-1.89908	1.40187	0.214384	56.6929	87.907	9.97867	8.07958
hSQ023049	4299	-1.35338	-0.845866	0.625	0.56159	56.6929	87.9641	6.14716	5.30129
hSQ042768	10558	-1.35333	-0.96397	0.712296	0.537018	56.6929	87.9666	7.57085	6.60688
hSQ027663	7456	-1.35274	-0.788615	0.582977	0.592044	56.6929	87.9925	4.8783	4.08969
hSQ029066	23225	-1.35261	-1.15656	0.855058	0.458908	56.6929	87.9983	7.8253	6.66875
hSQ019670	4191	-1.35042	-0.848086	0.628018	0.572951	56.6929	88.0944	9.17404	8.32596
hSQ025392	60	-1.35038	-1.51809	1.12419	0.297888	56.6929	88.0958	8.81255	7.47652
hSQ044002	79594	-1.34872	-0.702166	0.520618	0.609004	56.6929	88.1688	6.79619	6.09403
hSQ025896	91151	-1.34618	-0.964867	0.716742	0.508383	56.6929	88.2796	5.49139	4.52652
hSQ002591	23654	-1.34593	-0.949021	0.705103	0.505185	56.6929	88.2905	6.01741	5.06839
hSQ028913	2070	-1.34562	-1.82472	1.35604	0.210802	56.6929	88.3043	6.40113	4.57641
hSQ013485	118924	-1.34247	-1.11495	0.830524	0.474688	56.6929	88.4416	5.46765	4.3527
hSQ006270	5768	-1.33933	-1.21025	0.90362	0.402818	56.6929	88.5782	7.07472	5.86448
hSQ025392	60	-1.3391	-1.62855	1.21615	0.272286	56.6929	88.588	8.81255	7.47652
hSQ034817	369	-1.3362	-0.687648	0.51463	0.620041	56.6929	88.714	4.63322	3.94557
hSQ024779	9322	-1.33506	-1.01934	0.763517	0.490906	56.6929	88.7634	6.13761	5.11827
hSQ007894	7025	-1.33021	-0.579586	0.435711	0.671486	56.6929	88.9727	5.91614	5.33656
hSQ007336	2935	-1.32983	-1.23242	0.926754	0.401523	56.6929	88.9891	10.0429	8.81051
hSQ024771	64783	-1.32977	-0.468992	0.352686	0.722639	56.6929	88.9915	7.44822	6.97923
hSQ011646	23133	-1.32929	-0.928162	0.698238	0.50591	56.6929	89.0122	7.92368	6.99552
hSQ042000	9802	-1.3291	-0.982974	0.739578	0.491182	56.6929	89.0204	5.89473	4.91176
hSQ034333	6157	-1.32794	-0.961633	0.724152	0.548689	56.6929	89.0702	6.0033	5.04167
hSQ025392	60	-1.32747	-1.61163	1.21406	0.271044	56.6929	89.0907	8.81255	7.47652
hSQ044059	55159	-1.32658	-0.818944	0.617335	0.570425	56.6929	89.1288	6.84116	6.02221
hSQ039591	4035	-1.32626	-1.12263	0.846468	0.440154	56.6929	89.1427	8.57995	7.45732
hSQ007836	124454	-1.32415	-0.571734	0.431774	0.673118	56.6929	89.2329	6.57443	6.00269
hSQ019520	5743	-1.3226	-0.73082	0.552562	0.604229	56.6929	89.2992	5.90222	5.1714
hSQ012341	65108	-1.32235	-1.22461	0.926081	0.402997	59.8512	89.3098	7.03219	5.80758
hSQ030861	2107	-1.32223	-0.609123	0.46068	0.654384	59.8512	89.3153	7.30231	6.69319
hSQ024241	8718	-1.32115	-0.7775	0.588503	0.585841	59.8512	89.3614	8.99304	8.21554
hSQ045471	29979	-1.32026	-0.669824	0.507343	0.623817	59.8512	89.3994	8.90703	8.23721
hSQ045556	56267	-1.3183	-0.526876	0.399664	0.693591	59.8512	89.483	7.36719	6.84031
hSQ008149	201725	-1.31809	-0.677475	0.513982	0.619928	59.8512	89.4918	3.82637	3.14889
hSQ001738	2923	-1.31729	-1.98306	1.5054	0.419849	59.8512	89.5258	10.85	8.86691
hSQ025392	60	-1.31618	-1.34506	1.02194	0.350131	59.8512	89.5731	8.81255	7.47652
hSQ039733	7296	-1.31549	-0.806667	0.613208	0.588928	59.8512	89.6026	7.65628	6.84961
hSQ025392	60	-1.31412	-1.34093	1.0204	0.356042	59.8512	89.6604	8.81255	7.47652
hSQ014399	6103	-1.31202	-0.75176	0.572977	0.591975	59.8512	89.7494	5.27084	4.51908
hSQ030314	23607	-1.3115	-0.712895	0.543574	0.604158	59.8512	89.7718	6.45702	5.74412
hSQ035677	55920	-1.31132	-0.904259	0.689581	0.51629	59.8512	89.7794	7.98173	7.07747
hSQ029149	7056	-1.31113	-1.14054	0.869886	0.453112	59.8512	89.7871	6.46541	5.32488
hSQ026265	162681	-1.31015	-0.66978	0.511224	0.623542	59.8512	89.8287	5.56768	4.8979
hSQ002536	79850	-1.30787	-0.755681	0.577796	0.584447	59.8512	89.9251	4.53983	3.78415
hSQ031728	283464	-1.30772	-0.95372	0.729297	0.49328	59.8512	89.9311	5.73623	4.78251
hSQ007134	81796	-1.30749	-0.626105	0.478859	0.648627	59.8512	89.9408	5.69428	5.06817
hSQ045146	6464	-1.30644	-0.681383	0.521557	0.617603	59.8512	89.9852	5.75193	5.07055
hSQ028451	166614	-1.3063	-0.795502	0.608973	0.572229	59.8512	89.9911	5.21463	4.41913
hSQ014452	113189	-1.30594	-0.652373	0.499545	0.643518	59.8512	90.0064	6.16357	5.5112
hSQ003753	9588	-1.30563	-1.64283	1.25826	0.27659	59.8512	90.0192	8.12188	6.47905
hSQ021779	4124	-1.30389	-0.906341	0.695104	0.554322	59.8512	90.0923	5.90207	4.99573
hSQ025392	60	-1.30378	-1.36571	1.0475	0.382367	59.8512	90.097	8.81255	7.47652
hSQ025392	60	-1.30329	-1.44201	1.10644	0.319096	59.8512	90.1178	8.81255	7.47652
hSQ025392	60	-1.30295	-1.31115	1.00629	0.370834	59.8512	90.1318	8.81255	7.47652
hSQ025392	60	-1.3028	-1.45743	1.11868	0.332819	59.8512	90.138	8.81255	7.47652
hSQ042034	440701	-1.30251	-0.577576	0.443434	0.670917	59.8512	90.1504	6.50195	5.92437
hSQ041083	6229	-1.30189	-0.529367	0.406616	0.693173	59.8512	90.1765	5.78597	5.2566
hSQ025392	60	-1.30186	-1.6409	1.26042	0.26234	59.8512	90.1776	8.81255	7.47652
hSQ021443	7534	-1.30131	-1.41096	1.08426	0.326243	59.8512	90.2006	8.48812	7.56359
hSQ044463	7324	-1.29934	-0.939018	0.722687	0.51706	59.8512	90.283	5.3546	4.41558
hSQ011866	5836	-1.29833	-0.693263	0.533965	0.620951	59.8512	90.3253	10.1089	9.41564
hSQ041351	200014	-1.29804	-0.991632	0.763948	0.479341	59.8512	90.3376	4.69165	3.70002
hSQ034555	10455	-1.29643	-0.831807	0.641615	0.546039	59.8512	90.4047	5.45631	4.6245
hSQ025392	60	-1.29476	-1.38409	1.06899	0.334667	59.8512	90.474	8.81255	7.47652
hSQ013949	875	-1.29374	-0.801067	0.619185	0.585058	59.8512	90.5163	7.7738	6.97274
hSQ023070	6732	-1.29024	-0.626015	0.485192	0.64982	59.8512	90.6616	6.84378	6.21776
hSQ032202	23283	-1.29008	-0.650582	0.504294	0.634568	59.8512	90.6681	7.77792	7.12734
hSQ044624	10991	-1.28891	-2.7992	2.17176	0.0662759	59.8512	90.7166	9.32374	6.52453
hSQ043317	6147	-1.28872	-1.85122	1.43649	0.336441	59.8512	90.7248	8.06768	6.21646
hSQ013237	55628	-1.28656	-0.726664	0.56481	0.608706	59.8512	90.8136	7.3449	6.61823
hSQ023588	1265	-1.28532	-0.703809	0.547577	0.624907	59.8512	90.865	6.0958	5.39199
hSQ018949	5573	-1.28518	-0.630333	0.490462	0.64194	59.8512	90.8706	7.45628	6.82595
hSQ008687	6155	-1.28512	-0.730523	0.568448	0.59607	59.8512	90.8731	7.80154	7.07102
hSQ033387	84068	-1.28492	-1.19062	0.926609	0.401643	59.8512	90.8811	5.23796	4.04734
hSQ021561	23062	-1.28362	-0.831499	0.647776	0.546322	59.8512	90.9347	6.58341	5.75191
hSQ025392	60	-1.28304	-1.0973	0.855234	0.438068	59.8512	90.9586	8.81255	7.47652
hSQ033028	6230	-1.28253	-1.64856	1.28539	0.397026	59.8512	90.9794	7.40676	5.7582
hSQ028384	6558	-1.28225	-0.737291	0.574997	0.60224	59.8512	90.991	7.37616	6.63887
hSQ033856	23136	-1.28008	-0.670013	0.523414	0.629571	59.8512	91.0799	8.24273	7.57272
hSQ022003	7545	-1.27972	-0.77061	0.602171	0.586689	59.8512	91.0948	6.42044	5.64983
hSQ035167	5066	-1.27947	-0.878456	0.686576	0.563682	59.8512	91.1048	6.20085	5.3224
hSQ023729	23087	-1.27943	-0.559577	0.437365	0.680731	59.8512	91.1067	6.22385	5.66427
hSQ045418	1477	-1.27845	-0.669859	0.523961	0.630101	59.8512	91.1467	8.06722	7.39736
hSQ031156	6745	-1.27829	-1.01633	0.795072	0.46783	59.8512	91.1534	6.70379	5.68746
hSQ025678	4306	-1.27784	-0.536058	0.419502	0.692119	59.8512	91.1715	6.96841	6.43235
hSQ009201	998	-1.27649	-1.95011	1.52771	0.186829	59.8512	91.2267	9.95682	8.00672
hSQ010006	6135	-1.2762	-1.45202	1.13777	0.39153	59.8512	91.2386	8.12874	6.67672
hSQ020172	998	-1.27559	-0.778137	0.610023	0.579743	59.8512	91.2636	6.23381	5.45568
hSQ018817	6389	-1.27527	-0.933236	0.731796	0.536637	59.8512	91.2765	8.92753	7.99429
hSQ026576	23384	-1.27488	-0.746941	0.585889	0.607757	59.8512	91.2922	7.13058	6.38364
hSQ014171	7388	-1.27486	-0.717252	0.562614	0.605373	59.8512	91.2933	5.26431	4.54706
hSQ021443	7534	-1.27444	-0.982736	0.771109	0.488898	59.8512	91.31	8.48812	7.56359
hSQ015418	51605	-1.27438	-0.565596	0.443819	0.675938	59.8512	91.3125	7.8747	7.3091
hSQ025392	60	-1.27283	-1.50787	1.18466	0.333802	59.8512	91.3757	8.81255	7.47652
hSQ033172	4781	-1.2719	-0.827228	0.650385	0.575416	59.8512	91.4132	5.10665	4.27942
hSQ036131	64802	-1.26959	-0.942493	0.742359	0.530077	66.0341	91.5069	5.92392	4.98143
hSQ030667	4238	-1.26803	-0.625304	0.49313	0.643605	66.0341	91.5701	6.60251	5.97721
hSQ014296	8915	-1.26735	-1.17339	0.925862	0.399502	66.0341	91.5977	6.32136	5.14798
hSQ013433	56983	-1.26727	-0.565393	0.44615	0.677866	66.0341	91.6008	4.85186	4.28647
hSQ034478	151507	-1.26694	-0.635427	0.501543	0.643547	66.0341	91.6139	4.45578	3.82035
hSQ000631	389101	-1.26659	-1.29022	1.01866	0.441165	66.0341	91.6283	6.89365	5.60343
hSQ035092	4035	-1.26656	-1.06964	0.844519	0.524038	66.0341	91.6293	6.68657	5.61694
hSQ020529	26122	-1.26392	-0.730111	0.577654	0.592436	66.0341	91.7354	4.60683	3.87672
hSQ011195	253725::439973	-1.26119	-0.739785	0.586579	0.599912	66.0341	91.8453	7.15561	6.41583
hSQ032322	171023	-1.26045	-0.634952	0.503751	0.647837	66.0341	91.8748	5.96284	5.32788
hSQ025392	60	-1.26025	-1.26774	1.00594	0.378566	66.0341	91.8829	8.81255	7.47652
hSQ023158	84706	-1.25997	-0.632642	0.50211	0.639313	66.0341	91.8941	5.72565	5.09301
hSQ025392	60	-1.25878	-1.44316	1.14648	0.310675	66.0341	91.9415	8.81255	7.47652
hSQ045290	63876	-1.2578	-0.657603	0.522819	0.628272	66.0341	91.9806	5.79258	5.13498
hSQ026215	122585	-1.25758	-1.44797	1.1514	0.397284	66.0341	91.9894	7.56959	6.12161
hSQ005394	23034	-1.25756	-0.63159	0.502236	0.652193	66.0341	91.9903	4.47935	3.84776
hSQ027030	55227	-1.2564	-1.10166	0.876833	0.508452	66.0341	92.0364	5.93099	4.82933
hSQ008521	55905	-1.2543	-0.615081	0.490378	0.647687	66.0341	92.12	4.99036	4.37527
hSQ038013	6389	-1.25409	-0.860124	0.685856	0.569939	66.0341	92.1284	8.47793	7.61781
hSQ000992	1962	-1.25312	-0.641918	0.512255	0.63437	66.0341	92.1667	6.38215	5.74023
hSQ031261	4298::56930	-1.25201	-0.712582	0.569152	0.608251	66.0341	92.211	6.00878	5.2962
hSQ031575	84736	-1.25054	-0.723119	0.578247	0.595244	66.0341	92.2692	4.24676	3.52364
hSQ016888	93134	-1.25037	-0.625899	0.500573	0.651023	66.0341	92.2759	4.28587	3.65998
hSQ032009	55028	-1.24964	-0.606007	0.484944	0.652359	66.0341	92.3044	6.13787	5.53186
hSQ002862	23185	-1.2486	-0.533331	0.427144	0.690325	66.0341	92.3458	6.49434	5.96101
hSQ004782	79068	-1.24823	-1.22067	0.977921	0.382898	66.0341	92.3603	8.27867	7.058
hSQ033678	813	-1.24692	-0.5516	0.44237	0.684264	66.0341	92.4118	7.56601	7.01441
hSQ029637	2321	-1.24685	-1.28723	1.03239	0.371555	66.0341	92.4147	10.3146	9.02735
hSQ038843	23213	-1.24668	-1.35535	1.08717	0.347122	66.0341	92.4213	7.87599	6.52064
hSQ014938	405	-1.24443	-0.652961	0.524709	0.63161	66.0341	92.5099	6.80522	6.15226
hSQ027889	55240	-1.24199	-0.760937	0.612677	0.605119	66.0341	92.6054	7.20888	6.44794
hSQ018497	2968	-1.24138	-0.615387	0.49573	0.659395	66.0341	92.6293	7.00788	6.3925
hSQ038017	6389	-1.24115	-0.617347	0.497397	0.656928	66.0341	92.638	8.48244	7.96853
hSQ011941	23462	-1.24022	-1.58649	1.2792	0.279874	66.0341	92.6745	10.0213	8.4348
hSQ020077	60625	-1.24007	-0.644467	0.519703	0.632862	66.0341	92.6804	5.99811	5.35364
hSQ025857	2960	-1.23992	-0.491327	0.396259	0.710447	66.0341	92.6864	7.12925	6.63792
hSQ026100	54807	-1.23824	-0.894417	0.722332	0.524043	66.0341	92.7519	5.48308	4.58866
hSQ011830	9317	-1.23779	-0.737268	0.595635	0.60682	66.0341	92.7694	6.65244	5.91517
hSQ025392	60	-1.23766	-1.51814	1.22661	0.334069	66.0341	92.7742	8.81255	7.47652
hSQ002865	8226	-1.23759	-0.459713	0.371458	0.726898	66.0341	92.777	5.06292	4.60321
hSQ025392	60	-1.23743	-1.50425	1.21562	0.293463	66.0341	92.7832	8.81255	7.47652
hSQ035036	390948	-1.23737	-0.968681	0.782857	0.482213	66.0341	92.7857	9.60781	8.63913
hSQ004278	124454	-1.23702	-0.473853	0.38306	0.721017	66.0341	92.7991	6.4387	5.96484
hSQ002926	2665	-1.23699	-0.967255	0.781945	0.544136	66.0341	92.8004	10.0543	9.08701
hSQ044029	9546	-1.23559	-0.983164	0.795707	0.478575	66.0341	92.8549	4.44092	3.45775
hSQ038992	54993	-1.23545	-0.739764	0.598782	0.608967	66.0341	92.8602	6.29446	5.55469
hSQ025392	60	-1.23319	-1.2929	1.04842	0.39391	66.0341	92.9479	8.81255	7.47652
hSQ019948	351	-1.23268	-1.32489	1.07481	0.350768	66.0341	92.9673	8.5349	7.21
hSQ024557	145165	-1.23242	-0.834855	0.677413	0.5862	66.0341	92.9776	8.6172	7.78234
hSQ023837	9555	-1.23204	-0.513357	0.416673	0.700162	66.0341	92.9922	8.05037	7.53701
hSQ020525	4163	-1.22995	-0.586966	0.47723	0.661168	66.0341	93.073	6.52869	5.94172
hSQ025392	60	-1.22958	-1.39164	1.1318	0.378013	66.0341	93.0871	8.81255	7.47652
hSQ000269	84061	-1.22891	-1.15546	0.940234	0.400179	66.0341	93.113	7.59191	6.43645
hSQ015828	54868	-1.22802	-0.988714	0.805128	0.473512	66.0341	93.147	5.80089	4.81217
hSQ038499	151146	-1.22596	-0.611154	0.498511	0.654957	66.0341	93.2262	6.04528	5.43413
hSQ025840	813	-1.22566	-1.34521	1.09754	0.369274	66.0341	93.2375	8.21123	6.86601
hSQ018683	55315	-1.22529	-0.795958	0.649606	0.561023	66.0341	93.2516	5.85085	5.05489
hSQ007145	9889	-1.22502	-0.638963	0.521592	0.650277	66.0341	93.2619	5.56786	4.9289
hSQ025392	60	-1.22445	-1.30988	1.06977	0.394938	66.0341	93.2841	8.81255	7.47652
hSQ001354	163033	-1.22411	-0.924528	0.755266	0.508248	66.0341	93.297	7.16821	6.24368
hSQ025819	22850	-1.22399	-0.636211	0.519783	0.648078	66.0341	93.3013	5.86978	5.23356
hSQ014233	56658	-1.22315	-0.605206	0.494792	0.65334	66.0341	93.3335	4.78114	4.17593
hSQ034030	387103	-1.22295	-1.0019	0.819255	0.468171	66.0341	93.3414	6.06236	5.06046
hSQ024962	64763	-1.2224	-1.14262	0.93473	0.41574	66.0341	93.3621	7.85519	6.71257
hSQ042466	7431	-1.22199	-1.25281	1.02522	0.479857	66.0341	93.3779	10.2777	9.02488
hSQ002902	9949::286505	-1.22071	-0.903854	0.740433	0.510523	66.0341	93.4266	6.27364	5.36979
hSQ029790	126820	-1.21956	-1.37413	1.12675	0.352185	66.0341	93.4705	8.28585	6.91172
hSQ037482	171017	-1.21947	-0.63801	0.523187	0.649258	66.0341	93.4739	6.20324	5.56523
hSQ044623	9908	-1.21906	-1.35684	1.11302	0.322532	66.0341	93.4893	10.6434	9.28655
hSQ025392	60	-1.21877	-1.41551	1.16142	0.358317	66.0341	93.5003	8.81255	7.47652
hSQ026317	1000	-1.21787	-1.33199	1.09371	0.364523	66.0341	93.5346	9.32287	7.99089
hSQ000343	4957	-1.21667	-0.660636	0.542986	0.645568	66.0341	93.58	5.94934	5.2887
hSQ033587	120364	-1.21655	-0.731648	0.601411	0.603433	66.0341	93.5845	7.14534	6.41369
hSQ001747	6166	-1.21655	-1.84949	1.52028	0.281515	66.0341	93.5847	8.79321	6.94372
hSQ032274	26064	-1.2153	-0.981124	0.807311	0.555542	66.0341	93.6319	7.26154	6.28041
hSQ009059	7295	-1.21375	-2.19649	1.80968	0.181775	66.0341	93.6905	9.43225	7.23576
hSQ017340	1174	-1.21372	-0.878467	0.72378	0.525546	66.0341	93.6914	4.90079	4.02232
hSQ034036	8660	-1.21049	-0.677219	0.55946	0.636041	71.0566	93.8132	7.71215	7.03493
hSQ014804	200734	-1.21046	-0.658962	0.544388	0.632343	71.0566	93.8141	4.56387	3.90491
hSQ033544	51534	-1.20911	-0.759162	0.627867	0.579312	71.0566	93.8647	7.35585	6.59668
hSQ033153	55239	-1.20863	-0.571183	0.472587	0.674502	71.0566	93.8829	8.21831	7.64712
hSQ025392	60	-1.20702	-1.4503	1.20156	0.34804	71.0566	93.9431	8.81255	7.47652
hSQ025392	60	-1.20693	-1.44248	1.19517	0.353207	71.0566	93.9464	8.81255	7.47652
hSQ015584	8602	-1.2063	-0.838288	0.694926	0.539868	71.0566	93.97	8.5871	7.74881
hSQ024172	6164	-1.20502	-0.960426	0.797021	0.529926	71.0566	94.0177	5.76081	4.80039
hSQ023773	56916	-1.20474	-0.733489	0.608838	0.587053	71.0566	94.0282	6.87049	6.137
hSQ026995	2935	-1.20316	-0.956263	0.794793	0.491441	71.0566	94.0869	9.2391	8.28284
hSQ021705	55355	-1.20262	-0.521661	0.433772	0.696786	71.0566	94.1072	6.13179	5.61013
hSQ018311	repname(hSQ018311)	-1.20162	-0.81066	0.674637	0.555707	71.0566	94.144	7.15721	6.34655
hSQ002202	57156	-1.20132	-1.20741	1.00507	0.379299	71.0566	94.1551	6.01971	4.8123
hSQ016250	55314	-1.20068	-1.13007	0.94119	0.439778	71.0566	94.1789	6.26807	5.138
hSQ025393	60	-1.20056	-1.5149	1.26183	0.288803	71.0566	94.1835	8.50741	6.99251
hSQ037420	201164	-1.19948	-0.488082	0.406911	0.714824	71.0566	94.2234	5.23818	4.7501
hSQ020939	57506	-1.19916	-1.79547	1.49728	0.190524	71.0566	94.2353	5.41151	3.61604
hSQ025392	60	-1.19885	-1.2229	1.02006	0.388149	71.0566	94.2467	8.81255	7.47652
hSQ039817	7170	-1.19843	-1.07462	0.896693	0.456011	71.0566	94.2622	8.88257	7.80795
hSQ025392	60	-1.1966	-1.14835	0.95968	0.423788	71.0566	94.3296	8.81255	7.47652
hSQ038017	6389	-1.19646	-0.607085	0.507399	0.656387	71.0566	94.3347	8.48244	7.96853
hSQ028200	8554	-1.19614	-0.906569	0.75791	0.546975	71.0566	94.3465	7.43726	6.53069
hSQ000103	26973	-1.19555	-0.646225	0.540525	0.630661	71.0566	94.3683	7.54978	6.90356
hSQ025392	60	-1.19549	-1.21516	1.01646	0.395049	71.0566	94.3707	8.81255	7.47652
hSQ027802	9739	-1.19441	-0.67661	0.566481	0.619858	71.0566	94.4102	6.22899	5.55238
hSQ025392	60	-1.19427	-1.23218	1.03174	0.396354	71.0566	94.4152	8.81255	7.47652
hSQ001935	6629	-1.19336	-1.72432	1.44492	0.228157	71.0566	94.4486	10.6505	8.92623
hSQ033816	84548	-1.19296	-0.575946	0.482786	0.677599	71.0566	94.4634	5.13381	4.55786
hSQ027370	9794	-1.19191	-0.846209	0.709959	0.541711	71.0566	94.5018	5.60092	4.75471
hSQ035913	55362	-1.19187	-0.709811	0.595545	0.598958	71.0566	94.5035	5.78279	5.07298
hSQ035361	28969	-1.19093	-0.872209	0.732376	0.519519	71.0566	94.5377	8.11927	7.24706
hSQ032518	9070	-1.18971	-0.726571	0.610714	0.605064	71.0566	94.5824	8.20484	7.47827
hSQ002569	repname(hSQ002569)	-1.18948	-1.07156	0.90087	0.460317	71.0566	94.5908	3.36939	2.3908
hSQ032132	10165	-1.18932	-0.840009	0.706294	0.554614	71.0566	94.5965	8.57513	7.73512
hSQ010545	3646	-1.18906	-1.00563	0.845736	0.466265	71.0566	94.606	9.43183	8.42619
hSQ010702	9372	-1.1884	-1.214	1.02155	0.396614	71.0566	94.6301	7.09421	5.8802
hSQ032480	163702	-1.18744	-0.561141	0.472565	0.676978	71.0566	94.6651	3.67918	3.11804
hSQ025392	60	-1.18731	-1.19441	1.00597	0.448505	71.0566	94.6695	8.81255	7.47652
hSQ027746	93973	-1.1867	-0.846192	0.713064	0.53288	71.0566	94.6919	6.86131	6.01512
hSQ021443	7534	-1.18636	-1.4041	1.18353	0.31021	71.0566	94.7041	8.48812	7.56359
hSQ019891	79613	-1.18632	-0.765527	0.645297	0.587162	71.0566	94.7058	8.24114	7.47561
hSQ025392	60	-1.1859	-1.04602	0.882052	0.448914	71.0566	94.721	8.81255	7.47652
hSQ028177	83892	-1.18554	-0.778373	0.656554	0.596141	71.0566	94.7338	6.67337	5.895
hSQ036025	4236	-1.1854	-0.814753	0.687325	0.575408	71.0566	94.7391	9.76041	8.94565
hSQ002269	442209	-1.18494	-0.84151	0.710171	0.545762	71.0566	94.7557	7.35823	6.51672
hSQ011795	126375	-1.18479	-0.750979	0.63385	0.600225	71.0566	94.7612	6.29573	5.54476
hSQ025392	60	-1.18471	-1.22754	1.03615	0.416352	71.0566	94.7641	8.81255	7.47652
hSQ044605	3184	-1.18443	-1.31133	1.10714	0.337437	71.0566	94.774	9.14757	7.83624
hSQ025392	60	-1.18384	-1.34343	1.13481	0.348609	71.0566	94.7956	8.81255	7.47652
hSQ025392	60	-1.18322	-1.28921	1.08958	0.403143	71.0566	94.8181	8.81255	7.47652
hSQ040141	103910	-1.18238	-0.751804	0.635838	0.579955	71.0566	94.8482	6.41194	5.66014
hSQ034352	4090	-1.18145	-0.826877	0.699885	0.545424	71.0566	94.882	6.18805	5.36117
hSQ006703	10664	-1.1813	-0.715699	0.605858	0.596201	71.0566	94.8873	7.75727	7.04157
hSQ025353	11052	-1.18079	-0.578887	0.490253	0.67358	71.0566	94.9056	7.93881	7.35992
hSQ034049	84085	-1.17895	-0.714716	0.606229	0.60967	71.0566	94.9717	6.69388	5.97916
hSQ038836	8106	-1.17794	-0.825255	0.700589	0.593324	71.0566	95.008	5.57017	4.74492
hSQ008760	6138	-1.17755	-1.42497	1.21011	0.410967	71.0566	95.022	10.0668	8.64188
hSQ028939	5782	-1.17682	-0.709386	0.602799	0.598595	71.0566	95.0482	4.46331	3.75392
hSQ025392	60	-1.17588	-1.24453	1.05839	0.418034	71.0566	95.082	8.81255	7.47652
hSQ032178	6228	-1.17307	-0.673238	0.573912	0.643049	71.0566	95.1823	5.5504	4.87717
hSQ021435	1836	-1.17183	-0.855609	0.730147	0.587512	71.0566	95.2263	6.39552	5.53992
hSQ043633	151162	-1.17172	-0.6805	0.580769	0.638918	71.0566	95.2301	6.28814	5.60764
hSQ002297	5690	-1.17138	-0.687033	0.586516	0.609486	71.0566	95.2423	7.38054	6.69351
hSQ005212	3312	-1.17121	-1.50357	1.28378	0.496991	71.0566	95.2485	14.0391	12.5355
hSQ020694	399474	-1.17108	-1.3838	1.18164	0.350392	71.0566	95.2528	7.36282	5.97902
hSQ041384	5001	-1.17055	-0.519973	0.444212	0.698473	71.0566	95.2717	7.82883	7.30886
hSQ042271	401725	-1.17001	-1.13486	0.969959	0.479334	71.0566	95.2909	7.37839	6.24353
hSQ023651	5927	-1.16913	-0.804379	0.688014	0.573667	71.0566	95.3221	8.4688	7.66442
hSQ036776	84629	-1.16906	-0.894874	0.765465	0.532601	71.0566	95.3246	7.2657	6.37082
hSQ005476	1349	-1.16877	-0.728031	0.622904	0.605142	71.0566	95.3349	5.39042	4.66238
hSQ029811	54680	-1.16845	-0.499205	0.427237	0.707068	71.0566	95.3461	7.26923	6.77003
hSQ017886	6400	-1.1684	-1.0357	0.886423	0.449472	71.0566	95.348	8.38418	7.34849
hSQ021443	7534	-1.16785	-1.45987	1.25005	0.297862	71.0566	95.3673	8.48812	7.56359
hSQ036279	28514	-1.16779	-0.797704	0.68309	0.595753	71.0566	95.3696	5.74879	4.95108
hSQ042121	54892	-1.1676	-0.581069	0.497663	0.671895	71.0566	95.3763	7.41831	6.83724
hSQ016121	8428	-1.16712	-0.578223	0.495428	0.664338	71.0566	95.3932	6.00235	5.42412
hSQ007029	6877	-1.16709	-0.743527	0.637078	0.581842	71.0566	95.3942	7.49804	6.75451
hSQ023299	375113	-1.16643	-2.7256	2.33671	0.25775	71.0566	95.4176	12.8843	10.1587
hSQ023030	55781	-1.16568	-0.567679	0.486993	0.671233	71.0566	95.4439	8.19102	7.62334
hSQ002413	200894	-1.16559	-0.690426	0.592342	0.616417	71.0566	95.4472	6.3787	5.68827
hSQ023581	80728	-1.16272	-0.621431	0.534465	0.644094	71.0566	95.5481	6.17389	5.55245
hSQ032514	6093	-1.16268	-0.847633	0.729031	0.542956	71.0566	95.5492	6.5107	5.66307
hSQ023607	4289	-1.16159	-0.641387	0.552163	0.635337	71.0566	95.5876	8.44497	7.80358
hSQ020288	7419	-1.16132	-0.793616	0.683376	0.583153	71.0566	95.5972	9.67721	8.88359
hSQ026699	5335	-1.16114	-0.702191	0.604745	0.616646	71.0566	95.6035	6.96176	6.25957
hSQ042311	2549	-1.16086	-0.658284	0.567068	0.63057	71.0566	95.6132	6.53121	5.87293
hSQ026034	6495	-1.15975	-0.879529	0.758379	0.553709	76.9451	95.6519	7.85278	6.97325
hSQ025392	60	-1.15913	-1.12645	0.971804	0.435764	76.9451	95.6735	8.81255	7.47652
hSQ006540	64927	-1.15885	-0.711747	0.614184	0.604777	76.9451	95.6833	5.48827	4.77652
hSQ030162	80304	-1.15656	-0.554601	0.479527	0.68275	76.9451	95.763	7.10202	6.54742
hSQ020685	196264	-1.15562	-0.90606	0.784046	0.576002	76.9451	95.7956	4.40997	3.50391
hSQ030537	55159	-1.15319	-1.4739	1.27811	0.290675	76.9451	95.8799	8.03913	6.56523
hSQ025540	6497	-1.15254	-0.80763	0.700737	0.571622	76.9451	95.9021	5.27382	4.46619
hSQ002481	10428	-1.15156	-0.644667	0.55982	0.629882	76.9451	95.936	5.22684	4.58217
hSQ036024	26148	-1.151	-0.707319	0.614526	0.604193	76.9451	95.9554	6.39653	5.68921
hSQ031950	1499	-1.14946	-1.38725	1.20687	0.385845	76.9451	96.0083	10.8911	9.50384
hSQ001246	3916	-1.14938	-0.793386	0.690271	0.56318	76.9451	96.011	8.30906	7.51567
hSQ005920	6294	-1.14894	-0.551395	0.479918	0.68628	76.9451	96.0263	8.18126	7.62987
hSQ025392	60	-1.14847	-1.29895	1.13103	0.402828	76.9451	96.0423	8.81255	7.47652
hSQ032011	55568	-1.14823	-0.572892	0.498933	0.666697	76.9451	96.0504	5.07612	4.50322
hSQ034020	221061	-1.14666	-0.662434	0.577708	0.631984	76.9451	96.1044	4.74044	4.07801
hSQ002499	26150	-1.1456	-0.491245	0.428812	0.709161	76.9451	96.1407	4.40585	3.9146
hSQ013231	8178	-1.14416	-0.641241	0.560448	0.636351	76.9451	96.1898	6.23319	5.59195
hSQ025771	23613	-1.14343	-0.840755	0.735295	0.576636	76.9451	96.2147	6.90718	6.06642
hSQ031628	6566	-1.14224	-2.57054	2.25043	0.0724641	76.9451	96.2549	11.2999	8.72937
hSQ025067	54556	-1.14211	-0.558912	0.489368	0.686379	76.9451	96.2594	7.00185	6.44294
hSQ028313	89874	-1.14087	-0.612981	0.537291	0.645507	76.9451	96.3014	6.72513	6.11215
hSQ006283	10390	-1.14073	-0.922679	0.808848	0.519717	76.9451	96.3062	7.24633	6.32365
hSQ025392	60	-1.13897	-1.12934	0.991549	0.439942	76.9451	96.3659	8.81255	7.47652
hSQ009689	10762	-1.13805	-0.534409	0.469585	0.687049	76.9451	96.397	5.26413	4.72972
hSQ042489	9887	-1.13699	-0.599603	0.527358	0.665871	76.9451	96.4325	5.76661	5.16701
hSQ014238	57727	-1.13697	-0.722916	0.635825	0.607962	76.9451	96.4332	8.37838	7.65546
hSQ007168	4781	-1.13673	-0.728975	0.64129	0.629702	76.9451	96.4413	4.571	3.84203
hSQ017085	64285	-1.13585	-0.741276	0.65262	0.580896	76.9451	96.4711	4.08223	3.34096
hSQ036370	284672	-1.13571	-1.48743	1.3097	0.305966	76.9451	96.4758	8.85336	7.36593
hSQ045182	158158	-1.13491	-1.07815	0.949989	0.436202	76.9451	96.5027	7.6112	6.53305
hSQ025934	79710	-1.13484	-0.783482	0.690391	0.564637	76.9451	96.5049	7.19614	6.41266
hSQ017469	10105	-1.13411	-1.58502	1.39758	0.266573	76.9451	96.5293	7.93691	6.3519
hSQ020489	55148	-1.13344	-0.504157	0.444801	0.706112	76.9451	96.5517	6.15153	5.64737
hSQ012182	9045	-1.13306	-1.57813	1.39281	0.487342	76.9451	96.5646	8.69402	7.11589
hSQ025392	60	-1.13286	-1.31382	1.15973	0.409318	76.9451	96.5712	8.81255	7.47652
hSQ040420	5793	-1.13227	-0.470255	0.415321	0.724354	76.9451	96.591	6.51156	6.0413
hSQ025392	60	-1.13222	-1.25822	1.11128	0.364052	76.9451	96.5926	8.81255	7.47652
hSQ033820	10072	-1.1312	-2.15099	1.90151	0.444112	76.9451	96.6267	7.34852	5.19753
hSQ012903	4925::91561	-1.13113	-1.18995	1.052	0.480191	76.9451	96.6292	8.12393	6.93398
hSQ012981	57107	-1.13104	-0.477725	0.422376	0.716147	76.9451	96.632	5.83638	5.35866
hSQ018648	2731	-1.12905	-0.913334	0.808939	0.509263	76.9451	96.6983	7.94244	7.02911
hSQ009171	58190	-1.12903	-0.468469	0.414931	0.723685	76.9451	96.6991	3.33687	2.8684
hSQ023208	7227	-1.1278	-0.86404	0.766127	0.527857	76.9451	96.7398	5.73555	4.87151
hSQ039402	10111	-1.12739	-0.946247	0.839328	0.48497	76.9451	96.7536	7.56591	6.61967
hSQ025392	60	-1.12541	-1.27236	1.13058	0.35912	76.9451	96.8192	8.81255	7.47652
hSQ002694	64965	-1.12355	-0.717734	0.638807	0.615603	76.9451	96.8803	8.70572	7.98798
hSQ045520	2627	-1.12241	-0.8302	0.739658	0.553264	76.9451	96.9179	7.54812	6.71792
hSQ025392	60	-1.1222	-1.22702	1.09341	0.392286	76.9451	96.9248	8.81255	7.47652
hSQ017794	123283	-1.12217	-0.766118	0.682709	0.591638	76.9451	96.9257	7.16506	6.39894
hSQ015746	26052	-1.12167	-0.458994	0.409205	0.729016	76.9451	96.9422	8.3114	7.85241
hSQ022089	334	-1.1211	-0.982606	0.876466	0.476816	76.9451	96.961	10.1906	9.20801
hSQ033015	80224	-1.12099	-0.783334	0.698785	0.562394	76.9451	96.9645	5.90178	5.11845
hSQ025392	60	-1.12073	-1.17778	1.0509	0.405504	76.9451	96.9731	8.81255	7.47652
hSQ035067	1528	-1.1196	-0.541534	0.483687	0.684219	76.9451	97.0103	4.00437	3.46283
hSQ030354	5685	-1.11885	-1.26417	1.12988	0.431351	76.9451	97.0348	12.2059	10.9417
hSQ025392	60	-1.11878	-1.22858	1.09815	0.383525	76.9451	97.0371	8.81255	7.47652
hSQ004134	6294	-1.1186	-0.426069	0.380894	0.743679	76.9451	97.0428	8.77265	8.34658
hSQ025392	60	-1.11823	-1.34374	1.20167	0.325649	76.9451	97.0549	8.81255	7.47652
hSQ003448	55031	-1.11814	-0.764659	0.683868	0.569897	76.9451	97.0579	7.10746	6.3428
hSQ025392	60	-1.11806	-1.3232	1.18348	0.348666	76.9451	97.0606	8.81255	7.47652
hSQ004044	7469	-1.1179	-0.637126	0.569931	0.640673	76.9451	97.0657	6.89656	6.25943
hSQ025392	60	-1.11774	-1.171	1.04765	0.399141	76.9451	97.0708	8.81255	7.47652
hSQ025392	60	-1.116	-1.25173	1.12162	0.400452	76.9451	97.1277	8.81255	7.47652
hSQ016837	442344	-1.11595	-0.892738	0.799982	0.564584	76.9451	97.1293	5.83116	5.20279
hSQ013487	27074	-1.11588	-0.93286	0.835987	0.48859	76.9451	97.1316	6.97357	6.04071
hSQ004128	654	-1.11588	-0.930642	0.834	0.544857	76.9451	97.1316	5.87362	4.94298
hSQ025392	60	-1.11582	-1.19219	1.06844	0.407116	76.9451	97.1334	8.81255	7.47652
hSQ011035	391717	-1.11552	-0.698403	0.626081	0.606892	76.9451	97.1434	7.85772	7.15931
hSQ000467	55798	-1.11537	-0.689385	0.61808	0.612257	76.9451	97.1483	6.47587	5.78649
hSQ023479	145567	-1.11528	-0.524303	0.470107	0.695698	76.9451	97.1509	4.77798	4.25368
hSQ040530	342541	-1.11511	-1.38212	1.23945	0.353575	76.9451	97.1564	9.41046	8.02833
hSQ021635	26256	-1.11416	-0.693549	0.622484	0.6145	76.9451	97.1873	6.91842	6.22487
hSQ025392	60	-1.11407	-1.21448	1.09014	0.42143	76.9451	97.1904	8.81255	7.47652
hSQ000471	7727	-1.11351	-0.547419	0.491614	0.687687	81.5917	97.2083	6.79471	6.24729
hSQ025392	60	-1.11345	-1.57965	1.41869	0.256781	81.5917	97.2103	8.81255	7.47652
hSQ025582	5454	-1.11326	-1.31474	1.18098	0.33744	81.5917	97.2166	6.96633	5.6516
hSQ034678	1746	-1.11218	-0.663357	0.596447	0.651174	81.5917	97.2515	5.92681	5.26345
hSQ013150	23062	-1.11216	-0.707153	0.635837	0.600962	81.5917	97.2521	5.93872	5.23157
hSQ002646	4904	-1.11202	-2.40245	2.16044	0.131251	81.5917	97.2567	11.6835	9.28102
hSQ025392	60	-1.11096	-1.27227	1.1452	0.402632	81.5917	97.2908	8.81255	7.47652
hSQ038927	9232	-1.11089	-1.26512	1.13884	0.364591	81.5917	97.2932	7.12162	5.8565
hSQ004487	1743	-1.11014	-1.09836	0.989393	0.415001	81.5917	97.3174	7.9575	6.85914
hSQ005104	23149	-1.10999	-0.504093	0.45414	0.701708	81.5917	97.322	5.21048	4.70639
hSQ031238	4694	-1.10974	-0.59546	0.536575	0.653611	81.5917	97.3301	5.76834	5.17288
hSQ010940	5326	-1.10861	-0.593497	0.535352	0.664175	81.5917	97.3665	3.81631	3.22282
hSQ011150	3185	-1.10846	-1.59991	1.44337	0.256328	81.5917	97.3713	10.5693	8.96943
hSQ033658	6204	-1.10761	-1.60542	1.44945	0.443433	81.5917	97.3986	8.28576	6.68033
hSQ014881	1497	-1.10722	-0.747055	0.67471	0.575357	81.5917	97.411	5.99084	5.24378
hSQ025392	60	-1.10721	-1.02292	0.923872	0.502263	81.5917	97.4115	8.81255	7.47652
hSQ035274	1749	-1.10615	-0.834741	0.754634	0.594004	81.5917	97.4453	6.55669	5.72195
hSQ026406	3157	-1.10486	-1.96414	1.77772	0.136106	81.5917	97.4865	8.81299	6.84885
hSQ032544	63933	-1.10456	-0.596069	0.539646	0.665271	81.5917	97.4963	4.59551	3.99944
hSQ025392	60	-1.10425	-1.20855	1.09446	0.43271	81.5917	97.506	8.81255	7.47652
hSQ034461	27067	-1.10417	-0.46248	0.418848	0.726271	81.5917	97.5086	6.28624	5.82376
hSQ001537	157506	-1.10411	-0.870373	0.7883	0.543757	81.5917	97.5104	6.11735	5.24698
hSQ022867	9604	-1.10396	-0.485652	0.43992	0.714199	81.5917	97.5154	5.01396	4.52831
hSQ004264	10449	-1.10341	-0.731723	0.663145	0.583811	81.5917	97.5327	6.13267	5.40095
hSQ025392	60	-1.1022	-1.2545	1.13817	0.402167	81.5917	97.5713	8.81255	7.47652
hSQ007692	1891	-1.10211	-0.544214	0.493791	0.69333	81.5917	97.574	7.29585	6.75163
hSQ045010	51077	-1.10163	-0.551851	0.50094	0.685101	81.5917	97.5894	4.7769	4.22505
hSQ025392	60	-1.10123	-1.33602	1.21321	0.386765	81.5917	97.6021	8.81255	7.47652
hSQ010245	64858	-1.10114	-0.673574	0.611705	0.615684	81.5917	97.6048	5.49347	4.8199
hSQ025392	60	-1.10012	-1.1309	1.02798	0.431235	81.5917	97.6371	8.81255	7.47652
hSQ025392	60	-1.09701	-1.27142	1.15898	0.355823	81.5917	97.7354	8.81255	7.47652
hSQ027640	868	-1.09669	-0.673507	0.614125	0.619521	81.5917	97.7454	6.98277	6.30926
hSQ025392	60	-1.096	-1.26114	1.15068	0.365834	81.5917	97.7673	8.81255	7.47652
hSQ021443	7534	-1.09536	-1.32839	1.21274	0.328392	81.5917	97.7872	8.48812	7.56359
hSQ042155	51275	-1.0952	-0.728507	0.66518	0.586867	81.5917	97.7921	4.96757	4.23907
hSQ002450	24139	-1.09447	-0.888583	0.811888	0.511311	81.5917	97.8153	5.41531	4.52672
hSQ025392	60	-1.09444	-1.15974	1.05967	0.437663	81.5917	97.8161	8.81255	7.47652
hSQ030564	51430	-1.09427	-0.777298	0.710334	0.569692	81.5917	97.8214	5.45177	4.67447
hSQ034622	114885	-1.09417	-0.803286	0.73415	0.576202	81.5917	97.8245	8.02947	7.22618
hSQ025392	60	-1.0931	-1.17096	1.07123	0.42233	81.5917	97.8579	8.81255	7.47652
hSQ008242	56999	-1.09284	-0.719086	0.657998	0.618694	81.5917	97.8662	6.00952	5.29044
hSQ025392	60	-1.09209	-1.07066	0.980384	0.425539	81.5917	97.8897	8.81255	7.47652
hSQ003299	126626	-1.09193	-1.01592	0.93039	0.446488	81.5917	97.8947	4.69306	3.67714
hSQ033746	473	-1.09102	-0.506466	0.464212	0.702748	81.5917	97.9228	7.00331	6.49685
hSQ029202	79968	-1.09089	-0.684151	0.627152	0.632454	81.5917	97.9271	6.60365	5.9195
hSQ021501	6128	-1.09001	-1.77097	1.62472	0.274947	81.5917	97.9542	9.79239	8.02142
hSQ044875	8662	-1.09001	-0.586595	0.538157	0.660932	81.5917	97.9544	9.81255	9.22595
hSQ035006	10973	-1.08987	-0.8412	0.771832	0.604742	81.5917	97.9585	8.26542	7.42422
hSQ025392	60	-1.08964	-1.35415	1.24275	0.327332	81.5917	97.9658	8.81255	7.47652
hSQ002569	repname(hSQ002569)	-1.08936	-0.978589	0.898317	0.48791	81.5917	97.9746	3.36939	2.3908
hSQ018200	594	-1.0888	-0.747162	0.686224	0.621481	81.5917	97.9918	5.89525	5.14809
hSQ031377	27185	-1.08872	-0.559072	0.513514	0.681462	81.5917	97.9944	5.82763	5.26856
hSQ022731	390	-1.08833	-0.67956	0.624406	0.635763	81.5917	98.0064	6.75007	6.07051
hSQ034359	440027	-1.08778	-1.41897	1.30446	0.395849	81.5917	98.0235	6.61767	5.1987
hSQ008587	2934	-1.08691	-0.621441	0.571752	0.638411	81.5917	98.0505	8.36769	7.74625
hSQ025392	60	-1.08606	-1.36543	1.25723	0.398367	81.5917	98.0766	8.81255	7.47652
hSQ022727	53349	-1.08596	-0.714518	0.65796	0.591663	81.5917	98.0797	6.91636	6.20185
hSQ024812	84061	-1.0854	-1.94163	1.78886	0.179352	81.5917	98.0969	8.47682	6.53519
hSQ014328	10885	-1.08511	-0.575596	0.530448	0.666693	81.5917	98.1058	9.69347	9.11787
hSQ000613	57721	-1.08497	-0.7912	0.729236	0.586337	81.5917	98.1102	7.30512	6.51392
hSQ040006	30850	-1.08433	-0.492672	0.454355	0.709334	81.5917	98.1298	5.11546	4.62279
hSQ039178	3183	-1.08338	-1.60418	1.48072	0.26011	81.5917	98.1592	14.4551	12.8509
hSQ025392	60	-1.08218	-1.37517	1.27074	0.319631	81.5917	98.1958	8.81255	7.47652
hSQ005860	57136	-1.08178	-0.561863	0.519386	0.687321	81.5917	98.2081	7.15688	6.59502
hSQ026668	163859	-1.08154	-0.864695	0.799506	0.519288	81.5917	98.2156	7.76387	6.89918
hSQ007193	23154	-1.08145	-0.929797	0.859767	0.484501	81.5917	98.2182	8.11303	7.18323
hSQ024312	6839	-1.08142	-0.525469	0.485907	0.692208	81.5917	98.2192	6.45167	5.9262
hSQ000533	9984	-1.08102	-0.588045	0.543971	0.659679	81.5917	98.2313	7.34129	6.75325
hSQ025392	60	-1.08068	-1.56185	1.44525	0.256026	81.5917	98.2418	8.81255	7.47652
hSQ019523	6187	-1.08051	-2.04653	1.89405	0.405416	81.5917	98.2471	8.89693	6.8504
hSQ027249	2037	-1.08029	-0.962738	0.891183	0.564899	81.5917	98.2536	8.75174	7.789
hSQ025392	60	-1.07941	-1.03571	0.959515	0.471476	81.5917	98.2806	8.81255	7.47652
hSQ027718	79084	-1.07854	-0.930136	0.862404	0.484509	81.5917	98.307	7.81648	6.88634
hSQ018855	5566	-1.07841	-0.783024	0.726093	0.603909	81.5917	98.311	6.18223	5.39921
hSQ042808	22856	-1.07723	-0.705405	0.654834	0.60917	81.5917	98.3469	4.83578	4.13037
hSQ001487	51552	-1.07685	-1.57632	1.46383	0.242044	81.5917	98.3583	7.64817	6.07185
hSQ025392	60	-1.07572	-1.0793	1.00333	0.452303	81.5917	98.3926	8.81255	7.47652
hSQ038872	378	-1.07568	-1.01078	0.939669	0.446854	81.5917	98.3939	7.90794	6.89716
hSQ031889	23389	-1.07438	-0.972654	0.905319	0.463806	81.5917	98.4332	5.29503	4.32237
hSQ025392	60	-1.0725	-1.23808	1.15439	0.446632	81.5917	98.4897	8.81255	7.47652
hSQ011824	1973	-1.07213	-1.22519	1.14275	0.461559	81.5917	98.5007	9.8684	8.64321
hSQ045157	9789	-1.07199	-1.03398	0.964545	0.44574	81.5917	98.5051	7.17749	6.1435
hSQ015622	9414	-1.07177	-0.764375	0.71319	0.566218	81.5917	98.5117	8.81777	8.0534
hSQ015789	58190	-1.0715	-0.584574	0.545566	0.658508	81.5917	98.5197	3.23592	2.65135
hSQ037856	6448	-1.07131	-0.564146	0.526594	0.681055	81.5917	98.5254	6.01375	5.4496
hSQ016467	8454	-1.0708	-0.739206	0.690334	0.625534	85.3295	98.5409	9.36135	8.62214
hSQ014120	9815	-1.07022	-0.568757	0.53144	0.666254	85.3295	98.5582	6.99024	6.42149
hSQ035587	2182	-1.06906	-0.658223	0.615701	0.656675	85.3295	98.5927	9.43007	8.77185
hSQ045011	440	-1.06834	-0.975143	0.912762	0.570725	85.3295	98.6142	11.8517	10.8766
hSQ025392	60	-1.06748	-1.07325	1.0054	0.460594	85.3295	98.6399	8.81255	7.47652
hSQ025392	60	-1.06714	-1.10281	1.03343	0.431451	85.3295	98.6502	8.81255	7.47652
hSQ022676	220988	-1.06638	-1.9391	1.81839	0.199958	85.3295	98.6725	11.0343	9.09524
hSQ038006	6389	-1.06436	-0.600697	0.564376	0.665084	85.3295	98.7327	8.64821	8.04751
hSQ007111	53335	-1.06435	-0.719942	0.676416	0.597348	85.3295	98.733	6.46143	5.74149
hSQ019456	8570	-1.06398	-0.872071	0.819635	0.545964	85.3295	98.744	8.50932	7.63725
hSQ033305	57551	-1.06366	-2.26886	2.13308	0.0835893	85.3295	98.7534	7.87885	5.60998
hSQ004131	79660	-1.06355	-0.814561	0.765886	0.547841	85.3295	98.7565	5.03588	4.22131
hSQ022143	8322	-1.06349	-0.545133	0.512588	0.679057	85.3295	98.7583	4.82954	4.28441
hSQ001823	10939	-1.06153	-0.602081	0.567184	0.649024	85.3295	98.8162	7.61671	7.01463
hSQ021651	23160	-1.06152	-0.926784	0.873074	0.483376	85.3295	98.8165	8.36624	7.43946
hSQ031009	51300	-1.06144	-1.13253	1.06698	0.412791	85.3295	98.8189	6.33303	5.2005
hSQ016192	10277	-1.06049	-0.743953	0.701519	0.587308	85.3295	98.8468	8.00677	7.26281
hSQ044182	10938	-1.06048	-0.789866	0.74482	0.552792	85.3295	98.847	8.47044	7.68058
hSQ004837	6241	-1.06018	-0.643062	0.606557	0.637852	85.3295	98.8557	8.7167	8.07364
hSQ011249	repname(hSQ011249)	-1.06005	-0.642576	0.606176	0.633396	85.3295	98.8597	1.96016	1.31759
hSQ045439	7323	-1.05817	-0.818092	0.773118	0.548673	85.3295	98.9147	6.48567	5.66757
hSQ025392	60	-1.05778	-1.03362	0.977166	0.485111	85.3295	98.9263	8.81255	7.47652
hSQ037620	5792	-1.05713	-0.546045	0.516536	0.681588	85.3295	98.9451	6.98941	6.44337
hSQ025481	55167	-1.05709	-0.432985	0.409599	0.739168	85.3295	98.9462	5.38146	4.94848
hSQ036434	25764	-1.05702	-0.86625	0.819522	0.524468	85.3295	98.9484	5.21281	4.34656
hSQ035077	6599	-1.0563	-0.882193	0.835169	0.509364	85.3295	98.9692	10.534	9.6518
hSQ016931	754	-1.05539	-0.84802	0.80351	0.570603	85.3295	98.9957	5.76609	4.91807
hSQ033928	55148	-1.05517	-0.767636	0.727497	0.572987	85.3295	99.0021	6.79374	6.0261
hSQ020168	84914	-1.05414	-0.557032	0.528422	0.681617	85.3295	99.032	5.70336	5.14633
hSQ025392	60	-1.05347	-1.20666	1.14541	0.439099	85.3295	99.0514	8.81255	7.47652
hSQ014432	23150	-1.05319	-0.753762	0.715692	0.566178	85.3295	99.0596	5.7	4.94624
hSQ029653	9568	-1.05318	-0.561677	0.533314	0.671096	85.3295	99.0599	5.04813	4.48645
hSQ002973	9697	-1.05269	-0.707273	0.671869	0.591486	85.3295	99.074	5.27085	4.56357
hSQ035404	10635	-1.0519	-0.594982	0.565624	0.662852	85.3295	99.0968	5.25998	4.665
hSQ036022	857	-1.05105	-1.05193	1.00084	0.422844	85.3295	99.1216	4.67313	3.62119
hSQ033375	6629	-1.05102	-0.864161	0.822212	0.553946	85.3295	99.1224	8.1441	7.27993
hSQ025392	60	-1.04878	-1.01641	0.969138	0.508181	85.3295	99.1868	8.81255	7.47652
hSQ026451	9949	-1.04834	-0.710369	0.677614	0.591322	85.3295	99.1994	6.27735	5.56698
hSQ014397	79635	-1.04814	-0.666137	0.635543	0.614999	85.3295	99.2052	5.71971	5.05357
hSQ025392	60	-1.04771	-1.13709	1.0853	0.419345	85.3295	99.2173	8.81255	7.47652
hSQ030376	25799	-1.04658	-0.596955	0.570388	0.668331	85.3295	99.2499	6.29925	5.7023
hSQ010436	388275::642659	-1.04643	-2.07597	1.98387	0.224043	85.3295	99.2542	10.5703	8.49431
hSQ016127	8471	-1.0463	-0.802266	0.766766	0.546791	85.3295	99.2578	8.67027	7.86801
hSQ045075	144581	-1.04626	-1.86267	1.78032	0.268413	85.3295	99.259	7.86923	6.00657
hSQ026575	22820	-1.0458	-0.634369	0.606586	0.645957	85.3295	99.272	8.10648	7.47212
hSQ024839	64332	-1.0432	-0.547754	0.525071	0.680324	85.3295	99.3459	2.92205	2.3743
hSQ021753	8535	-1.04303	-0.611779	0.586542	0.643406	85.3295	99.3509	6.5796	5.96782
hSQ010216	440927	-1.04198	-1.41387	1.35691	0.450255	85.3295	99.3805	6.24174	4.82787
hSQ019162	8021	-1.04193	-0.502827	0.48259	0.707385	85.3295	99.3818	6.83734	6.33452
hSQ033639	23199	-1.04172	-0.585267	0.561828	0.655371	85.3295	99.3879	6.96282	6.37755
hSQ042038	1831	-1.04147	-0.973748	0.934979	0.465855	85.3295	99.3951	7.63837	6.66462
hSQ003533	1207	-1.04108	-0.738362	0.709229	0.595132	85.3295	99.4061	7.69951	6.96115
hSQ031490	1903::286223	-1.04087	-0.461253	0.44314	0.729509	85.3295	99.4118	5.28382	4.82257
hSQ029051	64839	-1.04063	-1.3133	1.26202	0.352275	85.3295	99.4187	7.74857	6.43528
hSQ025392	60	-1.04055	-1.14418	1.09959	0.450088	85.3295	99.4209	8.81255	7.47652
hSQ027790	2304	-1.04025	-0.617555	0.593662	0.644453	85.3295	99.4295	5.65584	5.03828
hSQ024575	10741	-1.04018	-0.611562	0.58794	0.643602	85.3295	99.4314	4.33879	3.72723
hSQ035598	125476	-1.03993	-0.765987	0.736573	0.601781	85.3295	99.4383	5.65806	4.89207
hSQ009207	81	-1.03974	-1.50457	1.44706	0.370013	85.3295	99.4437	9.35356	7.849
hSQ025392	60	-1.03874	-1.14281	1.10019	0.412383	108.165	99.4719	8.81255	7.47652
hSQ007907	50	-1.03725	-0.988264	0.95277	0.449728	108.165	99.5136	6.97321	5.98494
hSQ020827	55449	-1.03718	-0.402387	0.387962	0.755874	108.165	99.5156	4.76487	4.36248
hSQ023338	159195	-1.03665	-0.681508	0.657413	0.606714	108.165	99.5304	6.50495	5.82344
hSQ024903	80183	-1.03644	-0.770542	0.743449	0.570561	108.165	99.5363	5.32927	4.55873
hSQ016426	3609	-1.03641	-0.980671	0.946222	0.494181	108.165	99.5373	7.43461	6.45394
hSQ025392	60	-1.03635	-1.09004	1.05181	0.45727	108.165	99.5389	8.81255	7.47652
hSQ032679	23196	-1.0358	-0.555418	0.536219	0.675035	108.165	99.5541	4.65505	4.09963
hSQ028008	3092	-1.03529	-0.788725	0.761842	0.559009	108.165	99.5686	6.66785	5.87913
hSQ028234	10189	-1.03458	-0.959533	0.92746	0.537047	108.165	99.5882	8.27022	7.31069
hSQ036420	6430	-1.03431	-0.715775	0.692029	0.594009	108.165	99.5957	7.26017	6.5444
hSQ025392	60	-1.03301	-1.21922	1.18027	0.436497	108.165	99.632	8.81255	7.47652
hSQ025392	60	-1.03273	-1.08943	1.0549	0.479475	108.165	99.6396	8.81255	7.47652
hSQ023951	8449	-1.03269	-0.501745	0.48586	0.702249	108.165	99.6407	8.57829	8.07654
hSQ008765	55173	-1.0324	-0.46667	0.452025	0.726121	108.165	99.6489	4.87092	4.40425
hSQ025392	60	-1.03206	-1.24852	1.20974	0.41651	108.165	99.6584	8.81255	7.47652
hSQ016510	3251	-1.03169	-1.31957	1.27903	0.378527	108.165	99.6684	5.78129	4.46172
hSQ010810	54455	-1.03157	-0.476447	0.461864	0.714903	108.165	99.6718	5.65062	5.17417
hSQ034897	10577	-1.03127	-1.07487	1.04228	0.45653	108.165	99.6803	6.39493	5.32006
hSQ025392	60	-1.0309	-1.13783	1.10372	0.460165	108.165	99.6903	8.81255	7.47652
hSQ002286	54764	-1.03057	-0.4313	0.418504	0.740128	108.165	99.6994	4.61835	4.18705
hSQ023952	4833	-1.03024	-0.465319	0.45166	0.721083	108.165	99.7086	4.43543	3.97011
hSQ025392	60	-1.0302	-1.32266	1.28389	0.349693	108.165	99.7097	8.81255	7.47652
hSQ037988	84272	-1.03004	-0.533086	0.517537	0.684693	108.165	99.714	6.16227	5.62919
hSQ028489	23129	-1.02894	-0.5218	0.507122	0.698187	108.165	99.7444	4.24046	3.71866
hSQ025392	60	-1.02883	-1.05479	1.02523	0.457833	108.165	99.7475	8.81255	7.47652
hSQ020404	5318	-1.02866	-0.527842	0.513134	0.686977	108.165	99.752	7.73061	7.20276
hSQ013310	6764	-1.02852	-0.493253	0.479578	0.705805	108.165	99.7561	5.64167	5.14841
hSQ022121	9647	-1.02821	-0.803494	0.781448	0.537543	108.165	99.7645	5.58921	4.78572
hSQ011719	23657	-1.02776	-0.746154	0.726001	0.576552	108.165	99.7769	7.3547	6.60854
hSQ031481	6480	-1.02774	-0.514182	0.500304	0.709576	108.165	99.7775	5.70312	5.18894
hSQ009562	57216	-1.02749	-0.483353	0.47042	0.714734	108.165	99.7842	5.26209	4.77873
hSQ020386	51174	-1.02711	-0.476966	0.464379	0.716747	108.165	99.7948	6.16357	5.6866
hSQ001222	7184	-1.02607	-1.22315	1.19207	0.447629	108.165	99.8233	12.1764	10.9532
hSQ026975	55659	-1.02566	-0.748591	0.729866	0.589288	108.165	99.8345	6.25607	5.50748
hSQ035076	23199	-1.02525	-0.692299	0.67525	0.608867	108.165	99.8456	6.89099	6.19869
hSQ025392	60	-1.02421	-1.12331	1.09675	0.446756	108.165	99.8739	8.81255	7.47652
hSQ025392	60	-1.02405	-1.11142	1.08532	0.456782	108.165	99.8784	8.81255	7.47652
hSQ006842	79671	-1.024	-0.6405	0.625491	0.627418	108.165	99.8797	5.19425	4.55375
hSQ019140	51018::57241	-1.02379	-0.781859	0.763688	0.568097	108.165	99.8853	5.74447	4.96261
hSQ025392	60	-1.02374	-1.38928	1.35707	0.315545	108.165	99.8868	8.81255	7.47652
hSQ025392	60	-1.02324	-1.29472	1.26531	0.428093	108.165	99.9003	8.81255	7.47652
hSQ023684	64778	-1.02258	-0.71537	0.699575	0.627912	108.165	99.9183	5.96603	5.25066
hSQ019053	10165	-1.02186	-0.598469	0.585668	0.65094	108.165	99.9378	7.83144	7.23297
hSQ025392	60	-1.02147	-1.1362	1.11233	0.458306	108.165	99.9484	8.81255	7.47652
hSQ025392	60	-1.02088	-1.11635	1.09352	0.426167	108.165	99.9643	8.81255	7.47652
hSQ029426	4035	-1.01978	-0.730948	0.716771	0.603815	108.165	99.994	7.02468	6.29373
hSQ029517	29896	-1.01971	-0.807687	0.792076	0.546548	108.165	99.9959	9.0976	8.28991
hSQ025392	60	-1.01799	-1.08926	1.07001	0.449845	108.165	100	8.81255	7.47652
hSQ003208	337876	-1.0178	-0.73064	0.717861	0.578013	108.165	100	7.85758	7.12694
hSQ023287	153129	-1.01742	-0.590525	0.580417	0.661151	108.165	100	7.56878	6.97825
hSQ015341	351	-1.01739	-0.780745	0.767398	0.557163	108.165	100	8.01517	7.23442
hSQ025392	60	-1.01735	-1.09037	1.07177	0.468	108.165	100	8.81255	7.47652
hSQ001155	6207	-1.01729	-1.39557	1.37186	0.419786	108.165	100	8.89085	7.49528
hSQ025392	60	-1.01704	-1.14731	1.12809	0.40341	108.165	100	8.81255	7.47652
hSQ023958	29071	-1.01595	-0.952867	0.937906	0.468898	108.165	100	10.1216	9.16878
hSQ043951	137695	-1.01552	-0.57565	0.566851	0.679996	108.165	100	4.81901	4.24336
hSQ023010	9209	-1.01526	-0.666664	0.656642	0.621735	108.165	100	5.7015	5.03484
hSQ025392	60	-1.0149	-1.12833	1.11176	0.47544	108.165	100	8.81255	7.47652
hSQ024032	29123	-1.01486	-0.7231	0.712509	0.588007	108.165	100	6.80998	6.08688
hSQ013575	51322	-1.01457	-0.445626	0.439228	0.733336	108.165	100	5.2881	4.84248
hSQ027076	23403	-1.01419	-0.57745	0.569373	0.659402	108.165	100	5.07468	4.49723
hSQ025392	60	-1.01381	-1.14954	1.13388	0.460635	108.165	100	8.81255	7.47652
hSQ036881	26503	-1.01341	-0.583579	0.575856	0.683669	108.165	100	5.2975	4.71392
hSQ004816	50628	-1.01304	-0.756524	0.746786	0.621986	108.165	100	8.9169	8.16038
hSQ041156	9253	-1.01253	-1.43993	1.42211	0.282336	108.165	100	6.77472	5.3348
hSQ030560	79877	-1.01242	-0.960774	0.948987	0.471733	108.165	100	6.56454	5.60377
hSQ017876	23008	-1.01194	-0.577894	0.571075	0.661849	108.165	100	6.48699	5.9091
hSQ025392	60	-1.01176	-1.20363	1.18964	0.394684	108.165	100	8.81255	7.47652
hSQ017854	23514	-1.0114	-0.461891	0.456686	0.725806	108.165	100	4.10521	3.64332
hSQ007045	54888	-1.01134	-0.945675	0.935072	0.511816	108.165	100	10.4578	9.51209
hSQ039595	23759	-1.01096	-0.887431	0.877811	0.518423	108.165	100	7.01065	6.12322
hSQ004367	66000	-1.01052	-0.428477	0.424016	0.742447	108.165	100	4.21471	3.78623
hSQ021152	3030	-1.01031	-1.1485	1.13678	0.399112	108.165	100	8.44747	7.29897
hSQ029351	115	-1.00928	-0.59809	0.59259	0.648654	108.165	100	5.92025	5.32216
hSQ036575	90850	-1.00924	-0.615269	0.609636	0.639014	108.165	100	5.85814	5.24287
hSQ004771	5073	-1.00838	-0.714027	0.708095	0.586191	108.165	100	7.40223	6.6882
hSQ021127	11057	-1.00816	-0.647786	0.642545	0.64881	108.165	100	7.92355	7.27577
hSQ041086	80255	-1.00736	-1.13403	1.12575	0.383404	108.165	100	4.55092	3.41689
hSQ015136	4756	-1.00698	-0.728462	0.723413	0.580326	108.165	100	7.44211	6.71365
hSQ045340	54495	-1.00662	-0.60729	0.603296	0.642809	108.165	100	6.88626	6.27897
hSQ021381	5001	-1.00651	-0.640479	0.636337	0.647006	108.165	100	8.38006	7.73958
hSQ025392	60	-1.00595	-1.03016	1.02407	0.464762	108.165	100	8.81255	7.47652
hSQ027673	7105	-1.00521	-0.475297	0.472835	0.714872	108.165	100	6.79313	6.31784
hSQ043678	28965	-1.00517	-1.53995	1.53202	0.245874	108.165	100	8.36192	6.82197
hSQ036417	2799	-1.00501	-0.906313	0.901793	0.483972	108.165	100	8.09911	7.1928
hSQ025392	60	-1.00439	-1.11602	1.11114	0.444677	108.165	100	8.81255	7.47652
hSQ038150	9611	-1.00438	-0.600708	0.598087	0.669327	108.165	100	6.31505	5.71434
hSQ025392	60	-1.00317	-1.13279	1.12921	0.44822	108.165	100	8.81255	7.47652
hSQ002952	80209	-1.00305	-0.668456	0.666424	0.608834	108.165	100	5.02506	4.3566
hSQ000030	10657	-1.00247	-0.828142	0.826102	0.586587	108.165	100	10.6309	9.80274
hSQ032735	79960	-1.00198	-0.810718	0.809113	0.541763	108.611	100	5.68348	4.87277
hSQ025392	60	-1.00188	-1.03157	1.02963	0.451338	108.611	100	8.81255	7.47652
hSQ009170	5310	-1.00096	-0.568665	0.568121	0.686825	108.611	100	4.43989	3.87122
hSQ041317	9372	-1.00068	-1.05987	1.05915	0.424375	108.611	100	7.0966	6.03673
hSQ020445	23239	-1.00023	-0.552534	0.552405	0.677451	108.611	100	7.94362	7.39109
hSQ011626	390183	-1.00003	-1.16366	1.16363	0.474481	108.611	100	6.96336	5.7997
hSQ042706	402562	-0.999695	-1.32523	1.32563	0.369979	108.611	100	8.42386	7.09863
hSQ025392	60	-0.999456	-1.15377	1.1544	0.401206	108.611	100	8.81255	7.47652
hSQ033941	440039	-0.998981	-0.626742	0.627381	0.651645	108.611	100	5.21997	4.59323
hSQ017924	10409	-0.998538	-0.751202	0.752302	0.570122	108.611	100	5.40911	4.65791
hSQ042768	10558	-0.997514	-0.804645	0.80665	0.57378	108.611	100	7.57085	6.60688
hSQ040994	56647	-0.997346	-0.595264	0.596848	0.656192	108.611	100	5.96387	5.36861
hSQ025392	60	-0.997004	-1.02144	1.02451	0.458288	108.611	100	8.81255	7.47652
hSQ026871	51497	-0.996556	-0.606197	0.608292	0.671351	108.611	100	6.84255	6.23635
hSQ043224	90231	-0.995598	-0.540996	0.543388	0.692497	108.611	100	5.48896	4.94796
hSQ025392	60	-0.99542	-1.10001	1.10507	0.470082	108.611	100	8.81255	7.47652
hSQ025392	60	-0.995225	-1.40047	1.40719	0.289636	108.611	100	8.81255	7.47652
hSQ019705	26037	-0.995225	-0.527437	0.529967	0.694713	108.611	100	6.50572	5.97828
hSQ007980	4919	-0.994828	-0.661643	0.665083	0.627803	108.611	100	7.41472	6.75308
hSQ007756	23509	-0.993905	-0.657017	0.661046	0.613714	108.611	100	5.97126	5.31424
hSQ006833	55140	-0.993702	-0.523652	0.526971	0.70312	108.611	100	7.32244	6.79879
hSQ003850	5094	-0.993047	-0.536285	0.54004	0.68551	108.611	100	7.34222	6.80593
hSQ005817	1174	-0.992858	-0.551221	0.555186	0.673505	108.611	100	4.54816	3.99694
hSQ025392	60	-0.992233	-1.17075	1.17991	0.420369	108.611	100	8.81255	7.47652
hSQ036876	5495	-0.991578	-0.556347	0.561073	0.669213	108.611	100	6.01418	5.45783
hSQ034807	84154	-0.990782	-0.731911	0.73872	0.600625	108.611	100	6.35933	5.62742
hSQ028416	133619	-0.990128	-0.384401	0.388234	0.76744	108.611	100	7.74017	7.35577
hSQ025392	60	-0.989538	-1.09745	1.10905	0.441036	108.611	100	8.81255	7.47652
hSQ022862	8815	-0.989419	-0.642005	0.648871	0.626396	108.611	100	4.89572	4.25371
hSQ025392	60	-0.989413	-0.994401	1.00504	0.482079	108.611	100	8.81255	7.47652
hSQ008180	84986	-0.988801	-0.581237	0.58782	0.661835	108.611	100	6.10127	5.52004
hSQ031083	55421	-0.988716	-0.442496	0.447546	0.73667	108.611	100	6.75441	6.31191
hSQ025392	60	-0.988715	-1.47711	1.49397	0.263868	108.611	100	8.81255	7.47652
hSQ030786	9516	-0.988533	-0.476229	0.481754	0.714141	108.611	100	4.52872	4.05249
hSQ031386	9654	-0.988421	-0.957154	0.968367	0.46364	108.611	100	6.9059	5.94875
hSQ045287	9991	-0.988256	-0.990443	1.00221	0.448539	108.611	100	5.62028	4.62984
hSQ004955	22809	-0.987136	-0.760247	0.770154	0.565726	108.611	100	4.69682	3.93657
hSQ034542	9698	-0.986632	-0.537616	0.544901	0.679911	108.611	100	6.77392	6.23631
hSQ010093	10277	-0.986482	-0.750704	0.760991	0.586659	108.611	100	7.10019	6.34948
hSQ025079	6218	-0.986314	-1.01405	1.02812	0.595081	108.611	100	6.43615	5.4221
hSQ043863	85021	-0.986197	-0.936141	0.949243	0.470007	108.611	100	8.17775	7.24161
hSQ015416	55190	-0.98605	-0.458758	0.465248	0.731377	108.611	100	5.69681	5.23806
hSQ006400	5208	-0.985731	-0.521833	0.529387	0.688926	108.611	100	5.27838	4.75654
hSQ009799	64682	-0.985456	-0.607526	0.616492	0.649592	108.611	100	7.49728	6.88975
hSQ036871	3992	-0.985108	-0.416939	0.423242	0.75217	108.611	100	5.71275	5.29581
hSQ031969	8927	-0.984247	-0.69552	0.706652	0.626765	108.611	100	5.44508	4.74956
hSQ029768	83593	-0.98397	-0.607186	0.617078	0.641294	108.611	100	3.57399	2.9668
hSQ025392	60	-0.983652	-1.16866	1.18808	0.46028	108.611	100	8.81255	7.47652
hSQ009026	8087	-0.983444	-1.0483	1.06594	0.407421	108.611	100	7.18821	6.13991
hSQ027696	10808	-0.983368	-0.932498	0.948269	0.541586	108.611	100	9.35378	8.42128
hSQ008054	56256	-0.981742	-0.49516	0.504368	0.703817	108.611	100	4.80068	4.30552
hSQ044372	9149	-0.981417	-0.450707	0.459242	0.731562	108.611	100	4.44373	3.99302
hSQ028385	1373	-0.980869	-0.84067	0.857067	0.51813	108.611	100	6.3953	5.55462
hSQ027628	219404	-0.980396	-0.527488	0.538035	0.705894	108.611	100	4.52033	3.99284
hSQ034904	27346	-0.980385	-0.529846	0.540446	0.686025	108.611	100	5.26481	4.73497
hSQ010186	389393	-0.980083	-0.343337	0.350314	0.788061	108.611	100	5.17423	4.83089
hSQ039596	5033	-0.98004	-0.614054	0.62656	0.643093	108.611	100	7.09596	6.48191
hSQ029974	402098	-0.979647	-0.873588	0.891738	0.531095	108.611	100	5.43484	4.56125
hSQ007377	51593	-0.979214	-0.752494	0.768467	0.580764	108.611	100	8.18316	7.43066
hSQ003093	9150	-0.977753	-0.707483	0.72358	0.616227	108.611	100	7.55196	6.84448
hSQ025392	60	-0.977563	-1.10164	1.12692	0.425561	108.611	100	8.81255	7.47652
hSQ016516	3927	-0.976742	-0.605199	0.619609	0.640957	108.611	100	6.87024	6.26504
hSQ022038	441512	-0.976158	-0.781973	0.801072	0.559594	108.611	100	5.78552	5.00354
hSQ025554	392335	-0.976121	-0.696432	0.713469	0.595157	108.611	100	6.16706	5.47063
hSQ036071	9197	-0.975869	-0.534829	0.548054	0.683713	108.611	100	6.60316	6.06833
hSQ025392	60	-0.975814	-1.19817	1.22787	0.382376	108.611	100	8.81255	7.47652
hSQ010941	7170	-0.975472	-0.706226	0.723983	0.608789	108.611	100	7.51488	6.80866
hSQ023334	10079	-0.975444	-0.574172	0.588626	0.672869	108.611	100	5.76776	5.19358
hSQ025392	60	-0.975269	-1.20834	1.23898	0.372196	108.611	100	8.81255	7.47652
hSQ031129	5757	-0.975118	-1.93426	1.98362	0.128173	108.611	100	8.74818	6.81392
hSQ004792	113251	-0.975014	-1.0657	1.09301	0.494691	108.611	100	5.70522	4.63952
hSQ030475	984::728642	-0.974845	-0.553692	0.567979	0.678463	108.611	100	6.89086	6.33717
hSQ015340	7157	-0.974831	-0.656892	0.673852	0.629381	108.611	100	7.29671	6.63981
hSQ025392	60	-0.97421	-1.18067	1.21192	0.386286	108.611	100	8.81255	7.47652
hSQ021051	1182	-0.974189	-0.678044	0.696008	0.654615	108.611	100	6.11377	5.43573
hSQ025392	60	-0.973556	-1.11315	1.14339	0.430155	108.611	100	8.81255	7.47652
hSQ013579	10014	-0.97341	-0.445193	0.457354	0.731048	108.611	100	3.98208	3.53689
hSQ028061	54802	-0.973044	-0.382866	0.393472	0.766308	108.611	100	5.18874	4.80588
hSQ004295	84172	-0.972073	-0.69806	0.718115	0.594847	108.611	100	7.42841	6.73035
hSQ001832	6173	-0.97133	-0.696426	0.716982	0.62781	108.627	100	6.77667	6.08024
hSQ000586	8504::153914	-0.971303	-0.502754	0.517608	0.698928	108.627	100	7.32742	6.82467
hSQ027868	257415	-0.970915	-0.625842	0.64459	0.665117	108.627	100	5.35564	4.72979
hSQ040881	27291	-0.969672	-0.631988	0.651755	0.634783	108.627	100	6.26923	5.63724
hSQ044446	81627	-0.969321	-0.737779	0.761129	0.57553	108.627	100	9.13822	8.40044
hSQ011707	9776	-0.96919	-0.509538	0.525736	0.706796	108.627	100	5.58331	5.07377
hSQ036909	222484	-0.969018	-0.767914	0.792467	0.549412	108.627	100	6.66116	5.89325
hSQ022200	8650	-0.968849	-0.726424	0.74978	0.572965	108.627	100	6.19118	5.46476
hSQ037507	7871	-0.968756	-0.544594	0.562158	0.691218	108.627	100	5.53282	4.98822
hSQ034539	400	-0.96867	-0.517115	0.53384	0.707391	108.627	100	5.85338	5.33626
hSQ025392	60	-0.968545	-1.05291	1.0871	0.49796	108.627	100	8.81255	7.47652
hSQ001065	84186	-0.967409	-0.501944	0.518854	0.709605	108.627	100	5.47835	4.97641
hSQ025697	7837	-0.967213	-0.758721	0.784441	0.577219	108.627	100	7.57339	6.81467
hSQ006269	26273	-0.966741	-0.793842	0.821153	0.567537	108.627	100	7.51191	6.71807
hSQ025392	60	-0.966298	-1.2096	1.25179	0.475686	108.627	100	8.81255	7.47652
hSQ008840	91801	-0.966245	-0.517497	0.535575	0.690824	108.627	100	5.75197	5.23448
hSQ032034	6231	-0.965841	-1.12479	1.16457	0.491759	108.627	100	6.56376	5.43898
hSQ025392	60	-0.965724	-1.01121	1.0471	0.502453	108.627	100	8.81255	7.47652
hSQ017556	147040	-0.96572	-1.29835	1.34443	0.344274	108.627	100	7.02324	5.72489
hSQ029318	201626	-0.965599	-0.717615	0.743182	0.584847	108.627	100	8.47339	7.75578
hSQ018923	9658	-0.96454	-0.558825	0.57937	0.666856	108.627	100	5.73886	5.18003
hSQ033367	27230	-0.963322	-0.527951	0.548053	0.701508	108.627	100	4.20017	3.67222
hSQ030569	23361	-0.962975	-0.705645	0.732776	0.62345	108.627	100	6.89512	6.18947
hSQ045506	6169	-0.96275	-0.816791	0.848393	0.528549	108.627	100	7.32286	6.50606
hSQ031736	221264	-0.962648	-0.744123	0.772996	0.588995	108.627	100	6.81416	6.07004
hSQ018175	8781	-0.962542	-0.887869	0.922421	0.485172	108.627	100	7.98185	7.09398
hSQ040275	79956	-0.961306	-0.716825	0.745678	0.579927	108.627	100	7.58495	6.86813
hSQ025392	60	-0.961236	-1.45912	1.51796	0.268041	108.627	100	8.81255	7.47652
hSQ008332	2195	-0.960835	-0.618887	0.644113	0.636886	108.627	100	6.95627	6.33739
hSQ029668	7009	-0.9603	-1.47115	1.53197	0.407209	108.627	100	10.7221	9.25098
hSQ038155	84662	-0.96029	-0.622358	0.648094	0.632105	108.627	100	4.44949	3.82713
hSQ025392	60	-0.959434	-0.996547	1.03868	0.524787	108.627	100	8.81255	7.47652
hSQ030733	219931	-0.957803	-0.590138	0.616137	0.648676	108.627	100	5.44822	4.85808
hSQ040524	23150	-0.957641	-0.584409	0.61026	0.682873	108.627	100	5.84785	5.26344
hSQ025188	1605	-0.957179	-1.13188	1.18252	0.390081	108.627	100	9.75326	8.62138
hSQ022823	401206	-0.955075	-1.21796	1.27525	0.43391	108.643	100	6.94483	5.72688
hSQ033956	80179	-0.95439	-0.550675	0.576991	0.675189	108.643	100	5.01465	4.46398
hSQ025392	60	-0.953272	-1.14294	1.19897	0.405491	108.643	100	8.81255	7.47652
hSQ014172	55739	-0.953005	-0.447728	0.469807	0.732881	108.643	100	4.33529	3.88757
hSQ035739	2737	-0.952876	-0.782151	0.820831	0.556758	108.643	100	5.42059	4.63844
hSQ019896	84717	-0.952208	-0.90498	0.950401	0.546713	108.643	100	8.77387	7.86888
hSQ011291	8828	-0.952189	-0.970607	1.01934	0.485036	108.643	100	8.08069	7.11008
hSQ036294	3184	-0.951517	-0.806741	0.847847	0.535042	108.643	100	8.81384	8.0071
hSQ025392	60	-0.951481	-1.15309	1.21189	0.442634	108.643	100	8.81255	7.47652
hSQ015255	59348	-0.951097	-0.673651	0.708289	0.607177	108.643	100	5.32574	4.65209
hSQ013163	148430	-0.950943	-1.16002	1.21986	0.504822	108.643	100	6.84937	5.68935
hSQ002382	9674	-0.949831	-0.635079	0.668623	0.655692	108.643	100	4.64221	4.00713
hSQ025392	60	-0.949717	-1.07173	1.12847	0.469466	108.643	100	8.81255	7.47652
hSQ029671	4076	-0.948991	-0.990712	1.04396	0.510636	108.643	100	9.78867	8.79796
hSQ027277	10269	-0.948982	-1.19505	1.25929	0.352627	108.643	100	8.99624	7.80119
hSQ025392	60	-0.948896	-1.14308	1.20464	0.433674	108.643	100	8.81255	7.47652
hSQ017155	3159	-0.948076	-0.706393	0.745081	0.604247	108.643	100	5.93815	5.23175
hSQ002520	51054	-0.947501	-0.545767	0.576007	0.683286	108.643	100	3.234	2.68823
hSQ025392	60	-0.947259	-1.0197	1.07648	0.460608	108.643	100	8.81255	7.47652
hSQ038514	1952	-0.947082	-0.449396	0.474506	0.736877	108.643	100	6.53644	6.08704
hSQ014440	6297	-0.945878	-0.71322	0.75403	0.583977	108.643	100	7.67889	6.96567
hSQ005971	11221	-0.945562	-0.873482	0.92377	0.589027	108.643	100	5.8834	5.00992
hSQ014876	57532	-0.945481	-0.370201	0.391548	0.772882	108.643	100	6.70295	6.33275
hSQ022783	8140	-0.945147	-0.791919	0.837879	0.595576	108.643	100	6.94315	6.15123
hSQ040210	55322	-0.94491	-0.445356	0.471321	0.734789	108.643	100	6.23576	5.7904
hSQ025392	60	-0.944288	-1.07479	1.1382	0.489682	108.643	100	8.81255	7.47652
hSQ038942	29956	-0.943712	-0.734371	0.778172	0.577534	108.643	100	5.56805	4.83368
hSQ019567	488	-0.943473	-0.661417	0.701045	0.620906	108.643	100	7.66586	7.00445
hSQ030086	55110	-0.943449	-0.606186	0.642521	0.655245	108.643	100	5.52603	4.91984
hSQ003061	391126	-0.943032	-0.593206	0.629041	0.668632	108.643	100	7.03057	6.43736
hSQ043908	55683	-0.942292	-0.475298	0.504406	0.726788	108.643	100	6.15159	5.67629
hSQ043517	54471	-0.942043	-0.427827	0.454148	0.746384	108.643	100	5.33319	4.90536
hSQ029299	4478	-0.941835	-0.383263	0.406933	0.765229	108.643	100	11.9914	11.6081
hSQ017346	29105	-0.940977	-1.00166	1.06449	0.436022	108.643	100	8.15229	7.15063
hSQ032225	23729	-0.940728	-0.802705	0.85328	0.537771	108.643	100	7.35939	6.55669
hSQ042818	8846	-0.940569	-0.450648	0.479123	0.727297	108.643	100	6.24473	5.79408
hSQ006644	84923	-0.940446	-0.374405	0.398114	0.771138	108.643	100	3.81133	3.43692
hSQ029103	1785	-0.940386	-0.920105	0.978434	0.46783	108.643	100	8.04605	7.12595
hSQ000123	7019	-0.939271	-0.452893	0.482175	0.734506	108.643	100	6.24869	5.79579
hSQ013120	59274	-0.938783	-0.477218	0.508337	0.720904	108.643	100	4.72591	4.24869
hSQ001274	6636	-0.93867	-0.719869	0.766903	0.586788	108.643	100	5.37417	4.6543
hSQ019605	150580	-0.938485	-0.905637	0.964999	0.585956	108.643	100	7.12754	6.2219
hSQ028066	9761	-0.938338	-0.474064	0.505217	0.717321	108.643	100	5.1889	4.71483
hSQ022120	205428	-0.938055	-0.686886	0.732245	0.603739	108.643	100	6.16086	5.47397
hSQ025392	60	-0.937769	-1.38115	1.4728	0.287658	108.643	100	8.81255	7.47652
hSQ019511	80155	-0.937208	-0.955461	1.01948	0.450783	108.643	100	8.18887	7.23341
hSQ025392	60	-0.936499	-0.918908	0.981217	0.519249	108.643	100	8.81255	7.47652
hSQ025392	60	-0.935696	-0.998977	1.06763	0.477928	108.643	100	8.81255	7.47652
hSQ035897	8683	-0.935634	-0.892102	0.953473	0.543683	108.643	100	5.52048	4.62838
hSQ042312	66000	-0.935204	-0.507099	0.542233	0.694662	108.643	100	4.33207	3.82497
hSQ007934	55109	-0.934368	-0.476264	0.509718	0.71725	108.643	100	4.96032	4.48406
hSQ006389	6651	-0.933151	-0.90852	0.973604	0.4814	108.643	100	7.97762	7.0691
hSQ025392	60	-0.932753	-1.06452	1.14127	0.487754	108.643	100	8.81255	7.47652
hSQ002391	5937::192137	-0.932548	-0.661379	0.709217	0.636322	108.643	100	5.52376	4.86238
hSQ025392	60	-0.932191	-1.15462	1.23861	0.437276	108.643	100	8.81255	7.47652
hSQ000171	387640::219688	-0.932086	-0.766988	0.822873	0.605716	108.643	100	6.97646	6.20947
hSQ044388	10978	-0.931634	-0.60942	0.654141	0.635607	108.643	100	8.55925	7.94983
hSQ017253	10642	-0.931561	-0.646183	0.693656	0.623641	108.643	100	8.78436	8.13817
hSQ016257	1728	-0.931506	-0.740445	0.79489	0.569806	108.643	100	6.14873	5.40829
hSQ032180	80227	-0.930348	-0.492804	0.529699	0.703271	108.643	100	6.784	6.2912
hSQ009572	79960	-0.930061	-0.594398	0.639096	0.683607	108.643	100	6.14725	5.55285
hSQ032770	5565	-0.930024	-0.356054	0.382844	0.780984	108.643	100	4.01005	3.65399
hSQ025392	60	-0.929986	-1.05608	1.13559	0.470796	108.643	100	8.81255	7.47652
hSQ045240	51339	-0.9295	-0.63974	0.688263	0.652079	108.643	100	5.41377	4.77403
hSQ025392	60	-0.928693	-1.12782	1.21442	0.48545	108.643	100	8.81255	7.47652
hSQ033813	3985	-0.928601	-0.622882	0.670774	0.627911	108.643	100	5.42769	4.80481
hSQ033353	391824	-0.928187	-0.503917	0.542904	0.696198	108.643	100	8.17917	7.67525
hSQ014478	54828	-0.92795	-0.630363	0.679308	0.658848	108.643	100	7.09494	6.46458
hSQ023851	7770	-0.927854	-0.426028	0.459154	0.74573	108.643	100	4.93139	4.50536
hSQ025742	9733	-0.927834	-0.627474	0.676278	0.671005	108.643	100	7.84918	7.2217
hSQ031015	151987	-0.927723	-0.825627	0.889949	0.51901	108.643	100	5.98675	5.16112
hSQ037549	4522	-0.926461	-1.01166	1.09196	0.605416	108.643	100	11.3536	10.342
hSQ041401	84221	-0.926026	-0.462863	0.499838	0.725882	108.643	100	5.83403	5.37117
hSQ004705	6426	-0.925817	-1.77875	1.92127	0.158415	108.643	100	9.93143	8.15268
hSQ043246	388574	-0.925689	-0.502473	0.54281	0.710241	108.643	100	4.76157	4.2591
hSQ038017	6389	-0.925656	-0.63263	0.68344	0.677585	108.643	100	8.48244	7.96853
hSQ025392	60	-0.925599	-1.08892	1.17645	0.491995	108.643	100	8.81255	7.47652
hSQ001461	64779	-0.925279	-0.728419	0.787243	0.602083	108.643	100	5.08449	4.35607
hSQ022496	9846	-0.925262	-0.423859	0.458096	0.749432	108.643	100	4.81129	4.38743
hSQ029458	7417	-0.924974	-1.48817	1.60888	0.291152	108.643	100	11.0422	9.55399
hSQ025392	60	-0.924901	-1.14747	1.24064	0.364657	108.643	100	8.81255	7.47652
hSQ036080	3157	-0.924856	-2.07135	2.23964	0.117273	108.643	100	8.59264	6.52129
hSQ000663	157567	-0.924665	-0.699903	0.756927	0.605774	108.643	100	7.28287	6.58296
hSQ022974	146223	-0.924594	-0.497224	0.537776	0.717405	108.643	100	3.67547	3.17824
hSQ026399	518	-0.924546	-0.870104	0.941115	0.512508	108.643	100	8.37467	7.50457
hSQ021330	6138	-0.923966	-0.863977	0.935075	0.602664	108.643	100	7.77834	6.91437
hSQ027231	310	-0.923931	-0.566216	0.612834	0.659137	108.643	100	7.68835	7.39884
hSQ012653	7316	-0.923249	-1.82841	1.98041	0.525417	108.643	100	14.3889	14.5539
hSQ038068	3189	-0.923243	-0.75586	0.818701	0.648711	108.643	100	8.31056	7.5547
hSQ025392	60	-0.922969	-1.02444	1.10994	0.488625	108.643	100	8.81255	7.47652
hSQ026104	7866	-0.922897	-0.844553	0.91511	0.514693	108.643	100	4.95996	4.11541
hSQ019763	25930	-0.922773	-0.794758	0.861271	0.546506	108.643	100	6.59197	5.79721
hSQ006472	153562	-0.922671	-0.52281	0.566627	0.702999	108.643	100	5.60125	5.07844
hSQ025392	60	-0.922482	-1.10376	1.19651	0.48187	108.643	100	8.81255	7.47652
hSQ034114	51187	-0.92239	-0.630881	0.683964	0.621948	108.643	100	7.20649	6.57561
hSQ025392	60	-0.921349	-1.14206	1.23956	0.43497	108.643	100	8.81255	7.47652
hSQ005981	94234	-0.921018	-0.826517	0.897395	0.530155	108.643	100	5.14977	4.32325
hSQ006640	150166	-0.920305	-0.462549	0.502604	0.719247	108.643	100	6.65389	6.19134
hSQ008436	114299	-0.919967	-0.624107	0.678401	0.626726	108.643	100	7.00149	6.37739
hSQ025667	7374	-0.919453	-1.27369	1.38527	0.381139	108.643	100	10.5905	9.31681
hSQ025392	60	-0.919389	-1.05414	1.14657	0.462478	108.643	100	8.81255	7.47652
hSQ034797	10618	-0.919044	-0.551616	0.600207	0.671729	108.643	100	6.07292	5.52131
hSQ025392	60	-0.918861	-1.07016	1.16466	0.508318	108.643	100	8.81255	7.47652
hSQ041778	2114	-0.918656	-0.586922	0.638891	0.647989	108.643	100	6.87462	6.2877
hSQ036163	55756	-0.918561	-0.450873	0.490847	0.726261	108.643	100	8.22062	7.76975
hSQ038017	6389	-0.917429	-0.677627	0.738615	0.649389	108.643	100	8.48244	7.96853
hSQ025392	60	-0.917168	-1.14572	1.24919	0.459406	108.643	100	8.81255	7.47652
hSQ025392	60	-0.916737	-1.03643	1.13056	0.484747	108.643	100	8.81255	7.47652
hSQ009052	8883	-0.91658	-0.568743	0.620505	0.660163	108.643	100	7.0505	6.48176
hSQ010865	8720	-0.916357	-0.554724	0.605358	0.702753	108.643	100	4.19567	3.64094
hSQ026479	9873	-0.915779	-0.516824	0.564355	0.687474	108.643	100	5.3612	4.84438
hSQ020200	5744	-0.915042	-0.723956	0.791172	0.642912	108.643	100	4.60286	3.8789
hSQ039929	440673	-0.914577	-0.627622	0.686243	0.635732	108.643	100	4.82424	4.19662
hSQ028599	1948	-0.914546	-0.480697	0.525613	0.718009	108.643	100	5.43866	4.95796
hSQ039622	284119	-0.914071	-1.0909	1.19345	0.378568	108.643	100	8.66425	7.57334
hSQ019682	23076	-0.914014	-1.25316	1.37105	0.309965	108.643	100	8.7394	7.48624
hSQ026829	401884	-0.913719	-0.523873	0.573341	0.682775	108.643	100	3.75416	3.23028
hSQ027161	10446	-0.912688	-0.942389	1.03254	0.533976	108.643	100	7.44838	6.506
hSQ023756	1856	-0.91134	-0.714626	0.784148	0.578497	108.643	100	6.51695	5.80232
hSQ025392	60	-0.91128	-1.05144	1.15381	0.502349	108.643	100	8.81255	7.47652
hSQ031040	146691	-0.911022	-0.364753	0.400378	0.775498	108.643	100	6.38724	6.02249
hSQ025392	60	-0.910744	-1.01714	1.11682	0.495425	108.643	100	8.81255	7.47652
hSQ014655	389053::151445	-0.910609	-0.619059	0.67983	0.658845	108.643	100	8.69204	8.07298
hSQ043354	5832	-0.910064	-0.625217	0.687003	0.629707	108.643	100	9.33122	8.70601
hSQ038171	6152	-0.909949	-0.773306	0.849834	0.544862	108.643	100	8.89518	8.12188
hSQ020175	9421	-0.909589	-0.523537	0.575575	0.705906	108.643	100	5.24128	4.71775
hSQ043471	310	-0.909155	-0.651584	0.716692	0.610321	108.643	100	7.77661	7.12502
hSQ041488	10046	-0.90868	-0.589621	0.648876	0.682608	108.643	100	5.57999	4.99037
hSQ024099	6143	-0.907882	-1.34127	1.47737	0.532486	108.643	100	8.97427	7.633
hSQ015193	4302	-0.907761	-0.361379	0.3981	0.779306	108.643	100	3.83712	3.47574
hSQ025392	60	-0.907554	-1.08732	1.19807	0.444457	108.643	100	8.81255	7.47652
hSQ019139	23187	-0.907148	-0.566932	0.624961	0.658445	108.643	100	6.69218	6.12525
hSQ008586	6774	-0.906989	-0.873071	0.962603	0.618911	108.643	100	8.05315	7.18008
hSQ013039	1965	-0.906925	-0.856565	0.944472	0.523635	108.643	100	7.8057	6.94913
hSQ025392	60	-0.906891	-0.966191	1.06539	0.510865	108.643	100	8.81255	7.47652
hSQ020892	5360	-0.906668	-0.719134	0.793161	0.579212	108.643	100	8.34921	7.63007
hSQ025392	60	-0.906274	-1.10199	1.21596	0.414147	108.643	100	8.81255	7.47652
hSQ013888	4216	-0.906021	-0.482488	0.532535	0.708594	108.643	100	6.79135	6.30887
hSQ041257	388275	-0.905894	-0.87741	0.968556	0.506303	108.643	100	7.95295	7.07554
hSQ011239	5094	-0.905837	-1.02496	1.1315	0.437855	108.643	100	8.12418	7.09922
hSQ013545	repname(hSQ013545)	-0.905799	-1.59889	1.76517	0.210699	108.643	100	5.23248	3.63359
hSQ021771	5976	-0.905776	-0.531494	0.586783	0.679929	108.643	100	9.33318	8.80169
hSQ027139	10712	-0.905374	-0.735227	0.81207	0.576545	108.643	100	4.96704	4.23182
hSQ012601	2774	-0.905276	-0.44296	0.48931	0.732276	108.643	100	3.40227	2.95931
hSQ017550	7150	-0.905034	-0.909258	1.00467	0.489468	108.643	100	11.7305	10.8213
hSQ021024	25888	-0.903986	-0.556231	0.61531	0.670345	108.643	100	4.9469	4.39067
hSQ009848	85403	-0.903589	-0.488813	0.540969	0.703569	108.643	100	5.61464	5.12583
hSQ020850	10726	-0.903486	-0.653543	0.723357	0.609219	108.643	100	7.30087	6.64733
hSQ033035	5422	-0.90329	-0.682017	0.755037	0.592978	108.643	100	7.91635	7.23433
hSQ034519	10075	-0.902359	-1.15724	1.28246	0.348811	108.643	100	6.18771	5.03046
hSQ000592	121260	-0.901553	-0.819309	0.908775	0.519643	108.643	100	5.47199	4.65268
hSQ020130	7272	-0.901227	-0.806484	0.894873	0.532584	108.643	100	9.93326	9.12678
hSQ025392	60	-0.900594	-1.00033	1.11074	0.497446	108.643	100	8.81255	7.47652
hSQ009397	2934	-0.90054	-0.763377	0.847688	0.550748	108.643	100	8.55532	7.79194
hSQ039023	5160	-0.89899	-1.60885	1.78962	0.256581	108.643	100	12.4862	10.8773
hSQ040916	23294	-0.898112	-0.584717	0.651052	0.689381	108.643	100	7.68849	7.10377
hSQ025392	60	-0.897829	-1.04363	1.1624	0.437017	108.643	100	8.81255	7.47652
hSQ010094	63898	-0.897627	-0.810795	0.903265	0.573319	108.643	100	8.92324	8.11244
hSQ002251	repname(hSQ002251)	-0.897615	-0.602637	0.671375	0.638223	108.643	100	2.80055	2.51867
hSQ004036	4052	-0.897135	-0.576361	0.642446	0.653038	108.643	100	8.72444	8.14808
hSQ025392	60	-0.897085	-1.05496	1.17599	0.506461	108.643	100	8.81255	7.47652
hSQ018631	8607	-0.896741	-0.957801	1.06809	0.636227	108.643	100	11.7984	10.8406
hSQ021338	22938	-0.896486	-0.744279	0.830219	0.588393	108.643	100	10.6171	9.8728
hSQ013739	3030	-0.896198	-0.732048	0.816837	0.576846	108.643	100	8.28521	7.55317
hSQ004700	6202	-0.895686	-1.50849	1.68417	0.41704	108.643	100	7.75484	6.24635
hSQ025828	55735	-0.895595	-0.483151	0.539475	0.706673	108.643	100	6.90472	6.42156
hSQ025392	60	-0.895562	-1.26279	1.41005	0.320875	108.643	100	8.81255	7.47652
hSQ002960	10956	-0.89548	-0.701977	0.783912	0.579884	108.643	100	8.0174	7.31542
hSQ017684	57805	-0.894919	-0.45263	0.505778	0.724291	108.643	100	8.22052	7.76789
hSQ020799	23002	-0.894705	-0.67128	0.750281	0.626528	108.643	100	7.91979	7.24851
hSQ043934	130355	-0.894462	-0.859061	0.960422	0.491008	108.643	100	3.62794	2.76888
hSQ044635	3020	-0.894261	-0.984764	1.1012	0.451172	108.643	100	7.44375	6.45898
hSQ030188	29893	-0.893564	-0.47226	0.528513	0.71717	108.643	100	3.46524	2.99298
hSQ042854	9792	-0.893285	-0.459444	0.51433	0.7327	108.643	100	4.26872	3.80927
hSQ038016	6389	-0.893193	-0.607374	0.680003	0.667022	108.643	100	8.54067	7.93329
hSQ021959	3213	-0.892902	-0.5226	0.585282	0.685326	108.643	100	3.65627	3.13367
hSQ008815	303	-0.892177	-0.774287	0.867862	0.549873	108.643	100	9.20307	8.42879
hSQ014984	55700	-0.891846	-0.550495	0.617253	0.666764	108.643	100	6.37064	5.82015
hSQ033944	8301	-0.891825	-0.760225	0.852438	0.551866	108.643	100	9.31946	8.55923
hSQ036188	10291	-0.891324	-0.525131	0.589158	0.681005	108.643	100	8.51959	7.99446
hSQ025392	60	-0.891037	-1.02292	1.14801	0.48121	108.643	100	8.81255	7.47652
hSQ013060	29803	-0.890629	-0.370897	0.416444	0.772618	108.643	100	4.69028	4.31939
hSQ011681	9969	-0.890444	-0.393878	0.442339	0.765437	108.643	100	5.79724	5.40337
hSQ004980	2040	-0.890047	-0.510294	0.573334	0.694685	108.643	100	6.40628	5.89599
hSQ030595	55007	-0.889574	-0.576545	0.648114	0.649881	108.643	100	5.57884	5.00229
hSQ025392	60	-0.889102	-1.04632	1.17683	0.428518	108.643	100	8.81255	7.47652
hSQ014841	83606	-0.889091	-0.44009	0.494989	0.738542	108.643	100	4.09079	3.6507
hSQ036515	51582	-0.888483	-0.820796	0.923817	0.523107	108.643	100	5.79412	4.97332
hSQ007056	28955	-0.888125	-0.434784	0.489553	0.740559	108.643	100	4.2697	3.83491
hSQ032368	134997	-0.88787	-0.884465	0.996166	0.612057	108.643	100	10.6989	9.81445
hSQ025392	60	-0.887465	-1.07877	1.21556	0.463908	108.643	100	8.81255	7.47652
hSQ025284	387770	-0.887035	-0.580322	0.654226	0.672627	108.643	100	5.00095	4.42062
hSQ040776	3693	-0.886944	-0.519938	0.586213	0.683596	108.643	100	5.30092	4.78098
hSQ022513	54537	-0.886884	-0.410089	0.462393	0.748913	108.643	100	3.74356	3.33347
hSQ000704	55156	-0.886747	-0.675451	0.761718	0.613876	108.643	100	5.25876	4.58331
hSQ040722	7705	-0.88661	-1.16271	1.31141	0.354934	108.643	100	6.47706	5.31435
hSQ003481	164022	-0.886608	-1.67012	1.88371	0.503399	108.643	100	10.9884	9.31833
hSQ013823	10972	-0.886265	-0.714602	0.806308	0.578834	108.643	100	5.38895	4.67435
hSQ037800	7368	-0.886234	-0.796421	0.898657	0.521268	108.643	100	6.96016	6.16374
hSQ004034	23530	-0.8862	-0.391642	0.441934	0.760279	108.643	100	7.59906	7.20742
hSQ025937	824	-0.885719	-0.39314	0.443865	0.763899	108.643	100	6.34032	5.94718
hSQ032446	54919	-0.885507	-0.580162	0.655175	0.662201	108.643	100	7.80854	7.22838
hSQ012457	89122	-0.885165	-0.556367	0.628546	0.670652	108.643	100	7.51655	6.96019
hSQ026133	1910	-0.885101	-0.54647	0.61741	0.69324	108.643	100	7.94305	7.39657
hSQ035823	1107	-0.885078	-0.367418	0.415125	0.773875	108.643	100	5.24998	4.88256
hSQ003766	55958	-0.884822	-0.570654	0.644937	0.691621	108.643	100	8.78695	8.2163
hSQ025392	60	-0.884747	-1.06303	1.20151	0.414717	108.643	100	8.81255	7.47652
hSQ009147	348801	-0.884743	-0.545454	0.616511	0.67636	108.643	100	3.55284	3.00739
hSQ025142	7917	-0.884649	-0.961094	1.08641	0.475794	108.643	100	8.44978	7.48868
hSQ019743	54805	-0.88461	-0.778832	0.880424	0.535476	108.643	100	6.88338	6.10455
hSQ021443	7534	-0.884346	-0.92453	1.04544	0.536202	108.643	100	8.48812	7.56359
hSQ002733	2060	-0.884323	-0.456946	0.516718	0.724145	108.643	100	5.0469	4.58995
hSQ027325	8558	-0.884224	-1.69111	1.91253	0.161039	108.643	100	6.46534	4.77423
hSQ012112	54499	-0.883106	-0.41639	0.471506	0.747188	108.643	100	8.03186	7.61547
hSQ027902	441099	-0.883043	-0.839277	0.950438	0.619706	108.643	100	4.38521	3.54593
hSQ025392	60	-0.882828	-1.14278	1.29445	0.394751	108.643	100	8.81255	7.47652
hSQ020772	7112	-0.882511	-1.18119	1.33844	0.341163	108.643	100	8.69959	7.5184
hSQ038789	10908	-0.882498	-0.492669	0.558266	0.703524	108.643	100	5.86745	5.37479
hSQ025392	60	-0.882009	-1.31322	1.4889	0.296586	108.643	100	8.81255	7.47652
hSQ011965	25840	-0.881937	-0.755417	0.856544	0.577275	108.643	100	6.60537	5.84995
hSQ016064	55705	-0.881648	-0.468785	0.531714	0.731836	108.643	100	6.53978	6.07099
hSQ044496	2132	-0.880478	-0.454783	0.516518	0.722175	108.643	100	7.85554	7.40075
hSQ025392	60	-0.880372	-1.31975	1.49909	0.296577	108.643	100	8.81255	7.47652
hSQ031643	54552	-0.880341	-1.48355	1.6852	0.223559	108.643	100	7.46272	5.97917
hSQ012923	64778	-0.879471	-1.06029	1.2056	0.632458	108.643	100	6.88564	5.82534
hSQ026165	196527	-0.879352	-0.426062	0.484518	0.740923	108.643	100	6.8199	6.39383
hSQ038017	6389	-0.878637	-0.513909	0.584894	0.712326	108.643	100	8.48244	7.96853
hSQ015328	23060	-0.87862	-0.473863	0.539327	0.712954	108.643	100	6.7798	6.30594
hSQ038380	4303	-0.878478	-0.775883	0.883212	0.589481	108.643	100	5.21109	4.43521
hSQ021147	10159	-0.877907	-0.553337	0.630291	0.695048	108.643	100	8.52065	7.96731
hSQ005338	2885	-0.877755	-1.28715	1.46641	0.276495	108.643	100	8.34862	7.06147
hSQ004881	6130	-0.877497	-0.907384	1.03406	0.575025	108.643	100	6.5533	5.64592
hSQ036281	2009	-0.877198	-0.511992	0.583668	0.695817	108.643	100	6.46706	5.95507
hSQ006229	442037	-0.877151	-0.362695	0.413492	0.775953	108.643	100	3.848	3.48531
hSQ033837	2138	-0.876947	-0.587256	0.66966	0.647116	108.643	100	6.0707	5.48345
hSQ017242	2887	-0.876822	-0.419401	0.47832	0.753671	108.643	100	5.44151	5.02211
hSQ007304	2318	-0.876732	-0.410442	0.46815	0.74926	108.643	100	6.55636	6.14592
hSQ034517	51263	-0.876371	-0.486636	0.555286	0.714973	108.643	100	5.01656	4.52992
hSQ020956	10667	-0.87634	-0.438519	0.500399	0.735756	108.643	100	7.14909	6.71057
hSQ035767	3251	-0.876199	-0.602882	0.688065	0.66466	108.643	100	5.56836	4.96548
hSQ023345	9551	-0.875976	-0.487481	0.556501	0.712451	108.643	100	4.86395	4.37647
hSQ036416	54537	-0.875792	-0.482435	0.550856	0.707122	108.643	100	3.72701	3.24457
hSQ001096	85406	-0.875351	-0.351078	0.401072	0.783303	108.643	100	4.28349	3.93241
hSQ023754	148413	-0.875131	-0.409484	0.467912	0.751559	108.643	100	4.13767	3.72818
hSQ025392	60	-0.875008	-0.961742	1.09912	0.515154	108.643	100	8.81255	7.47652
hSQ011174	2806	-0.87473	-0.80846	0.924239	0.556773	108.643	100	11.282	10.4735
hSQ033307	7090	-0.873982	-0.445138	0.509322	0.732712	108.643	100	6.97583	6.53069
hSQ038613	79658	-0.873297	-0.74807	0.856604	0.568273	108.643	100	7.3551	6.60703
hSQ038042	125950	-0.872823	-0.759192	0.869813	0.54685	108.643	100	7.20589	6.44669
hSQ037754	147808	-0.872781	-0.637215	0.730096	0.615235	108.643	100	5.64469	5.00748
hSQ015439	7295	-0.872743	-1.06008	1.21465	0.404047	108.643	100	5.98531	4.92523
hSQ005130	10460	-0.872636	-0.623876	0.714934	0.684231	108.643	100	7.35495	6.73107
hSQ025392	60	-0.871968	-0.921647	1.05697	0.554281	108.643	100	8.81255	7.47652
hSQ021300	4751	-0.871625	-0.692327	0.794294	0.592341	108.643	100	8.30778	7.61545
hSQ002280	9372	-0.871449	-1.11664	1.28136	0.378363	108.643	100	6.38166	5.26503
hSQ012769	253558	-0.871413	-1.0472	1.20173	0.392395	108.643	100	7.77187	6.72467
hSQ043647	3838	-0.871371	-1.29415	1.48518	0.497897	108.643	100	12.8721	11.5779
hSQ021155	8879	-0.871016	-0.640615	0.735481	0.611669	108.643	100	5.60605	4.96544
hSQ042084	4162	-0.870587	-0.464243	0.533253	0.728746	108.643	100	6.88023	6.41599
hSQ013817	9517	-0.870583	-0.486316	0.558609	0.715355	108.643	100	7.09487	6.60856
hSQ025392	60	-0.870042	-1.01744	1.16941	0.49204	108.643	100	8.81255	7.47652
hSQ010646	151162	-0.869992	-0.641038	0.736833	0.671957	108.643	100	6.42783	5.7868
hSQ035722	166815	-0.869184	-0.530051	0.609825	0.713498	108.643	100	6.04931	5.51926
hSQ007356	113235	-0.869045	-0.568107	0.653714	0.666347	108.643	100	6.42779	5.85969
hSQ025392	60	-0.868526	-1.34118	1.5442	0.300773	108.643	100	8.81255	7.47652
hSQ022745	8812	-0.868443	-0.755959	0.870475	0.568007	108.643	100	5.92133	5.16537
hSQ014603	84900	-0.868066	-0.488262	0.56247	0.704867	108.643	100	5.90238	5.41412
hSQ008842	143884	-0.867586	-0.530217	0.611141	0.680218	108.643	100	8.07357	7.54335
hSQ002577	4644	-0.867225	-0.484847	0.559078	0.711223	108.643	100	6.47099	5.98614
hSQ015788	5337	-0.867144	-0.823269	0.949403	0.515426	108.643	100	7.90263	7.07937
hSQ025392	60	-0.866882	-0.975925	1.12579	0.50961	108.643	100	8.81255	7.47652
hSQ042747	57488	-0.866741	-0.475934	0.549108	0.722173	108.643	100	5.8196	5.34367
hSQ011186	200030	-0.866518	-0.59301	0.684359	0.650521	108.643	100	4.38181	3.7888
hSQ021502	145786	-0.865867	-0.413953	0.478079	0.745468	108.643	100	6.25072	5.83676
hSQ031782	133746	-0.865629	-0.311684	0.360067	0.805408	108.643	100	5.82606	5.51437
hSQ027498	64359	-0.865612	-0.453538	0.52395	0.732368	108.643	100	6.46014	6.0066
hSQ041183	1729	-0.865597	-0.455638	0.526386	0.726503	108.643	100	8.08016	7.62452
hSQ002705	5162	-0.865568	-0.821063	0.948583	0.524029	108.643	100	8.91874	8.09768
hSQ001783	23155	-0.865313	-0.632952	0.731472	0.62386	108.643	100	6.97948	6.34653
hSQ025392	60	-0.865307	-1.04059	1.20257	0.514628	108.643	100	8.81255	7.47652
hSQ012815	387	-0.865234	-1.46186	1.68955	0.246405	108.643	100	8.41504	6.95318
hSQ027642	441511	-0.864885	-0.518324	0.599298	0.683877	108.643	100	6.68066	6.16233
hSQ025392	60	-0.864703	-0.985423	1.13961	0.505684	108.643	100	8.81255	7.47652
hSQ022422	10206	-0.864663	-0.404437	0.467739	0.756904	108.643	100	6.13709	5.73265
hSQ002304	23148	-0.863917	-0.818353	0.947259	0.511491	108.643	100	7.27945	6.4611
hSQ009744	80204	-0.863766	-0.638554	0.739268	0.610757	108.643	100	7.23023	6.59167
hSQ025392	60	-0.863415	-0.95594	1.10716	0.502551	108.643	100	8.81255	7.47652
hSQ011234	392501	-0.863307	-0.960008	1.11201	0.45991	108.643	100	7.95872	6.99871
hSQ027397	5985	-0.862707	-0.578207	0.670224	0.648142	108.643	100	8.17843	7.60022
hSQ003348	1967	-0.862663	-0.43885	0.508716	0.745699	108.643	100	5.97148	5.53263
hSQ025392	60	-0.862473	-0.874533	1.01398	0.533043	108.643	100	8.81255	7.47652
hSQ038020	22992	-0.861342	-0.348033	0.404059	0.784668	108.643	100	6.35809	6.01005
hSQ040971	repname(hSQ040971)	-0.861218	-0.766258	0.889738	0.555993	108.643	100	6.21058	5.44432
hSQ025392	60	-0.861217	-1.14397	1.32831	0.380311	108.643	100	8.81255	7.47652
hSQ025392	60	-0.861073	-0.918881	1.06713	0.528721	108.643	100	8.81255	7.47652
hSQ032979	57474	-0.8606	-0.477065	0.55434	0.709525	108.643	100	5.29615	4.81908
hSQ006544	23081	-0.859659	-0.558047	0.649149	0.679864	108.643	100	6.58776	6.02971
hSQ011397	130589	-0.859403	-0.493279	0.573978	0.702265	108.643	100	7.55411	7.06083
hSQ025870	604	-0.859354	-0.578014	0.672614	0.645931	108.643	100	6.35219	5.77418
hSQ043920	65981	-0.859167	-0.403171	0.469258	0.755471	108.643	100	3.47935	3.07618
hSQ025392	60	-0.858866	-0.966665	1.12551	0.501572	108.643	100	8.81255	7.47652
hSQ009542	11130	-0.858829	-0.554789	0.645984	0.672464	108.643	100	5.12011	4.56532
hSQ037725	390107	-0.858551	-0.884669	1.03042	0.484624	108.643	100	7.99581	7.11114
hSQ044454	10360	-0.858524	-0.912875	1.06331	0.514018	108.643	100	5.29287	4.38
hSQ018717	65996	-0.858389	-1.05925	1.234	0.453085	108.643	100	7.22986	6.1706
hSQ044710	6667	-0.858123	-0.662412	0.771931	0.640098	108.643	100	6.87206	6.20964
hSQ025392	60	-0.858057	-0.91464	1.06594	0.50957	108.643	100	8.81255	7.47652
hSQ025378	160857	-0.857328	-0.746415	0.870629	0.574886	108.643	100	3.83622	3.0898
hSQ040653	80124	-0.856584	-0.659013	0.769349	0.606074	108.643	100	7.34353	6.68451
hSQ025392	60	-0.856419	-1.00322	1.17142	0.447603	108.643	100	8.81255	7.47652
hSQ020042	9144	-0.856414	-0.564753	0.65944	0.701699	108.643	100	5.54153	4.97678
hSQ045246	8674	-0.856076	-0.41616	0.486125	0.746305	108.643	100	3.47649	3.06033
hSQ044525	84440	-0.856063	-0.323463	0.37785	0.798621	108.643	100	5.74187	5.4184
hSQ025319	2040	-0.855612	-0.487606	0.569892	0.707894	108.643	100	5.53531	5.04771
hSQ044477	7077	-0.855332	-0.555341	0.64927	0.662682	108.643	100	5.34773	4.79239
hSQ031147	repname(hSQ031147)	-0.85519	-0.496595	0.580684	0.724568	108.643	100	3.87379	3.72179
hSQ013142	54751	-0.854773	-0.840056	0.982782	0.524027	108.643	100	5.27543	4.43538
hSQ043240	55536	-0.854329	-0.500838	0.586236	0.700421	108.643	100	5.89619	5.39535
hSQ025392	60	-0.854183	-1.0307	1.20665	0.510098	108.643	100	8.81255	7.47652
hSQ025392	60	-0.854125	-0.936721	1.0967	0.515216	108.643	100	8.81255	7.47652
hSQ031401	55693	-0.85405	-0.391207	0.458061	0.75984	108.643	100	7.80138	7.41017
hSQ007615	9885	-0.853898	-0.50922	0.596348	0.714189	108.643	100	6.26333	5.75411
hSQ040795	4650	-0.853583	-0.461531	0.540699	0.71722	108.643	100	6.4392	5.97767
hSQ030267	10769	-0.852849	-0.572396	0.671157	0.649566	108.643	100	7.07727	6.50488
hSQ029661	2271	-0.8526	-0.383958	0.450337	0.769376	108.643	100	8.76051	8.37655
hSQ036665	79053	-0.852366	-0.438378	0.514307	0.731767	108.643	100	7.37039	6.93201
hSQ043688	4154	-0.852245	-0.649474	0.762075	0.659116	108.643	100	4.28842	3.63894
hSQ042850	359948	-0.852061	-0.433153	0.508359	0.738636	108.643	100	7.38779	6.95464
hSQ023608	4289	-0.851716	-0.584232	0.685947	0.660065	108.643	100	8.33814	7.75391
hSQ014189	9910	-0.851156	-0.542427	0.637283	0.669956	108.643	100	8.5896	8.04718
hSQ025392	60	-0.851136	-1.16205	1.36529	0.417053	108.643	100	8.81255	7.47652
hSQ011970	4683	-0.850944	-0.4419	0.519305	0.740069	108.643	100	5.62989	5.18799
hSQ010035	6235	-0.850819	-0.556944	0.654598	0.663758	108.643	100	3.73314	3.17619
hSQ030315	84991	-0.850759	-0.694288	0.81608	0.594501	108.643	100	5.25428	4.55999
hSQ044551	11067	-0.850735	-0.613121	0.720695	0.630328	108.643	100	6.6517	6.03858
hSQ032794	23301	-0.850635	-0.436737	0.513425	0.746151	108.643	100	6.47203	6.03529
hSQ023591	7204	-0.850579	-0.702531	0.825944	0.679161	108.643	100	5.56588	4.86335
hSQ031455	23112	-0.850414	-0.652256	0.766986	0.643232	108.643	100	7.70384	7.05159
hSQ004546	84450	-0.85027	-0.476499	0.560409	0.709382	108.643	100	6.92664	6.45014
hSQ025392	60	-0.850235	-0.982829	1.15595	0.50418	108.643	100	8.81255	7.47652
hSQ027831	201484	-0.85023	-0.436104	0.512924	0.742028	108.643	100	3.4143	2.9782
hSQ027909	219844	-0.84967	-0.504487	0.593745	0.691921	108.643	100	6.2069	5.70241
hSQ013269	54556	-0.849365	-0.396742	0.467105	0.765293	108.643	100	7.09416	6.69741
hSQ011594	387703	-0.848866	-0.586606	0.691047	0.658299	108.643	100	8.86964	8.28303
hSQ033368	389840	-0.848863	-0.579111	0.68222	0.6478	108.643	100	4.44172	3.86261
hSQ025392	60	-0.847858	-1.00742	1.18819	0.479341	108.643	100	8.81255	7.47652
hSQ025392	60	-0.847404	-0.971136	1.14601	0.535336	108.643	100	8.81255	7.47652
hSQ038017	6389	-0.847354	-0.322992	0.381177	0.799073	108.643	100	8.48244	7.96853
hSQ006386	339324	-0.846211	-0.446413	0.527543	0.731591	108.643	100	5.2223	4.77589
hSQ015011	23082	-0.846061	-0.573436	0.677772	0.691463	108.643	100	6.18098	5.60754
hSQ044221	3251	-0.846044	-0.570642	0.674482	0.670958	108.643	100	5.84743	5.27679
hSQ000715	23095	-0.845903	-0.784565	0.927488	0.541036	108.643	100	8.67712	7.89256
hSQ038694	4163	-0.845772	-0.616814	0.729291	0.626575	108.643	100	6.60385	5.98704
hSQ030508	51185	-0.845499	-0.537796	0.63607	0.685753	108.643	100	5.91199	5.37419
hSQ013798	30812	-0.844514	-0.673785	0.797837	0.609933	108.643	100	5.04082	4.36703
hSQ028482	1808	-0.844413	-0.754045	0.892981	0.541229	108.643	100	8.85817	8.10412
hSQ021443	7534	-0.844412	-0.656439	0.777391	0.640319	108.643	100	8.48812	7.56359
hSQ027747	79589	-0.843841	-0.885331	1.04917	0.484197	108.643	100	7.23908	6.35375
hSQ037439	11143	-0.843333	-0.549275	0.651315	0.707452	108.643	100	8.21904	7.66977
hSQ036550	2804	-0.842853	-0.465732	0.552567	0.717133	108.643	100	6.50066	6.03493
hSQ004363	285590	-0.842516	-0.449076	0.533018	0.728752	108.643	100	8.23	7.78092
hSQ006574	286157	-0.842423	-1.49334	1.77267	0.238075	108.643	100	9.54429	8.05095
hSQ032811	57020	-0.842046	-0.58506	0.694807	0.645483	108.643	100	7.44629	6.86123
hSQ007698	10558	-0.841683	-0.690346	0.820198	0.632198	108.643	100	7.17433	6.48398
hSQ034248	57862	-0.841607	-0.395425	0.469845	0.75865	108.643	100	4.87447	4.47904
hSQ025392	60	-0.840854	-0.965257	1.14795	0.517882	108.643	100	8.81255	7.47652
hSQ025392	60	-0.840541	-1.13371	1.34879	0.388039	108.643	100	8.81255	7.47652
hSQ025392	60	-0.839696	-0.994486	1.18434	0.505619	108.643	100	8.81255	7.47652
hSQ040086	1892	-0.839457	-0.857898	1.02197	0.602761	108.643	100	8.18859	7.33069
hSQ000538	1824	-0.838854	-0.439702	0.52417	0.729827	108.643	100	7.98108	7.54137
hSQ023289	58476	-0.838212	-0.52389	0.625009	0.680424	108.643	100	5.32652	4.80263
hSQ018029	6234	-0.838193	-1.25602	1.49849	0.562775	108.643	100	6.53059	5.27457
hSQ025085	54880	-0.838153	-0.529604	0.631871	0.701865	108.643	100	7.85063	7.32102
hSQ035963	26031	-0.837909	-0.553552	0.660634	0.666932	108.643	100	6.1144	5.56085
hSQ022797	83860	-0.837698	-0.924329	1.10341	0.445202	108.643	100	6.52658	5.60225
hSQ026981	26009	-0.83699	-0.472751	0.564823	0.709905	108.643	100	5.25268	4.77993
hSQ012532	144100	-0.836904	-0.340637	0.40702	0.791469	108.643	100	5.51701	5.17638
hSQ027033	29855	-0.836799	-0.530123	0.633512	0.718486	108.643	100	7.24663	6.7165
hSQ025392	60	-0.836778	-0.965048	1.15329	0.508283	108.643	100	8.81255	7.47652
hSQ006162	170082	-0.83674	-0.739277	0.883521	0.585701	108.643	100	5.00245	4.26318
hSQ009058	1337	-0.83656	-0.867996	1.03758	0.58553	108.643	100	6.47002	5.60203
hSQ008991	6742	-0.836518	-1.20974	1.44616	0.365865	108.643	100	9.61536	8.40562
hSQ010718	57142	-0.836271	-0.476316	0.569571	0.707903	108.643	100	7.29291	6.81659
hSQ005716	23324	-0.835663	-0.4923	0.589113	0.700296	108.643	100	5.55082	5.05852
hSQ039563	10946	-0.835639	-0.812592	0.97242	0.545324	108.643	100	9.476	8.6634
hSQ029003	5520	-0.835547	-0.454913	0.54445	0.732492	108.643	100	9.02258	8.56766
hSQ043440	153642	-0.835381	-1.34496	1.61	0.256385	108.643	100	7.97397	6.62901
hSQ034472	5087	-0.834972	-1.25698	1.50542	0.286132	108.643	100	7.66016	6.40318
hSQ038017	6389	-0.834912	-0.579288	0.693831	0.708743	108.643	100	8.48244	7.96853
hSQ027741	5291	-0.834837	-0.381085	0.456478	0.767072	108.643	100	4.72384	4.34276
hSQ015425	2934	-0.834697	-0.832466	0.997327	0.489019	108.643	100	8.37731	7.54485
hSQ044009	493	-0.834639	-0.392993	0.470853	0.757532	108.643	100	6.4598	6.06681
hSQ000750	3340	-0.834598	-0.467689	0.560377	0.718354	108.643	100	4.99562	4.52793
hSQ029920	9931	-0.83422	-0.539662	0.646906	0.693599	108.643	100	6.7026	6.16294
hSQ038945	6645	-0.833981	-0.481036	0.576795	0.721025	108.643	100	6.09283	5.61179
hSQ025020	51531	-0.833819	-0.318574	0.382066	0.801121	108.643	100	5.05212	4.73355
hSQ038545	64834	-0.833602	-0.4683	0.56178	0.711276	108.643	100	5.83398	5.36568
hSQ002181	220906	-0.833529	-0.444757	0.533583	0.725302	108.643	100	6.19303	5.74827
hSQ022270	64429	-0.833418	-0.398432	0.47807	0.756496	108.643	100	4.10182	3.70339
hSQ025392	60	-0.83337	-1.12145	1.34568	0.39459	108.643	100	8.81255	7.47652
hSQ011131	10952	-0.83324	-0.83406	1.00098	0.499376	108.643	100	5.5866	4.75254
hSQ002251	repname(hSQ002251)	-0.833217	-0.62845	0.754245	0.627597	108.643	100	2.80055	2.51867
hSQ038334	390354	-0.832851	-1.41108	1.69427	0.69854	108.643	100	7.78531	6.37424
hSQ030680	1871	-0.831929	-0.515039	0.61909	0.694898	108.643	100	5.68796	5.17292
hSQ003296	79979	-0.831911	-1.8355	2.20636	0.140842	108.643	100	5.95622	4.12073
hSQ025392	60	-0.831788	-0.966965	1.16251	0.501948	108.643	100	8.81255	7.47652
hSQ026193	8898	-0.831299	-0.430958	0.518415	0.747136	108.643	100	4.65774	4.22678
hSQ033425	56850	-0.831027	-0.57171	0.687956	0.651547	108.643	100	7.53509	6.96338
hSQ025392	60	-0.830796	-1.04184	1.25402	0.49635	108.643	100	8.81255	7.47652
hSQ025392	60	-0.830746	-0.936182	1.12692	0.53626	108.643	100	8.81255	7.47652
hSQ002991	5441	-0.830554	-0.966274	1.16341	0.654466	108.643	100	5.09754	4.13127
hSQ004591	84747	-0.830465	-0.377075	0.454053	0.766849	108.643	100	4.72541	4.34833
hSQ025184	23168	-0.830086	-0.501454	0.604099	0.69997	108.643	100	6.91083	6.40938
hSQ010049	1455	-0.82989	-0.393871	0.474606	0.756303	108.643	100	3.80431	3.41044
hSQ009013	9410	-0.829784	-0.603345	0.727111	0.631278	108.643	100	6.59543	5.99208
hSQ025392	60	-0.829267	-1.08721	1.31105	0.409452	108.643	100	8.81255	7.47652
hSQ037565	55341	-0.829201	-0.468116	0.564538	0.734533	108.643	100	7.07509	6.60698
hSQ031645	2618	-0.829197	-0.542505	0.654253	0.717107	108.643	100	9.88336	9.34085
hSQ003502	211	-0.82919	-0.433336	0.522602	0.732266	108.643	100	7.55566	7.12232
hSQ005327	202243	-0.82915	-0.824024	0.993818	0.507139	108.643	100	4.6064	3.78238
hSQ026919	11276	-0.828966	-0.368275	0.444258	0.775868	108.643	100	6.91071	6.54244
hSQ019978	6168	-0.828733	-0.765523	0.923727	0.573747	108.643	100	4.63458	3.86906
hSQ028439	387032	-0.82845	-0.67965	0.820388	0.584254	108.643	100	5.83573	5.15608
hSQ025392	60	-0.827971	-0.876717	1.05887	0.569616	108.643	100	8.81255	7.47652
hSQ041712	65267	-0.827192	-0.923176	1.11604	0.450821	108.643	100	7.06068	6.1375
hSQ029551	56889	-0.827073	-0.647519	0.782904	0.599481	108.643	100	6.56345	5.91593
hSQ018477	346990	-0.82692	-1.03439	1.25089	0.398749	108.643	100	6.91886	5.88448
hSQ044478	164	-0.826837	-0.536494	0.648851	0.717017	108.643	100	8.43416	7.89766
hSQ003641	7270	-0.826689	-0.634188	0.767142	0.633729	108.643	100	7.20029	6.5661
hSQ007348	116985	-0.826211	-0.567981	0.687453	0.659926	108.643	100	6.42472	5.85674
hSQ045316	9723	-0.825997	-1.00294	1.21422	0.425703	108.643	100	7.97148	6.96854
hSQ006403	166647	-0.825974	-0.477732	0.578387	0.706178	108.643	100	4.72095	4.24322
hSQ020166	1666	-0.825802	-0.551531	0.667873	0.671304	108.643	100	6.68052	6.12899
hSQ044318	192137	-0.825719	-0.47793	0.578805	0.717336	108.643	100	5.48787	5.00994
hSQ022022	4668	-0.825473	-0.494607	0.59918	0.722358	108.643	100	5.98537	5.49077
hSQ008780	3218	-0.825168	-0.66622	0.807376	0.614794	108.643	100	4.61557	3.94935
hSQ037185	51141	-0.825055	-0.319552	0.387311	0.802681	108.643	100	3.98358	3.66402
hSQ036076	708	-0.82487	-1.30027	1.57633	0.371569	108.643	100	9.93185	8.63158
hSQ013999	5223	-0.824774	-1.01468	1.23025	0.478464	108.643	100	9.39259	8.37791
hSQ042603	10412	-0.82471	-0.469285	0.569031	0.710869	108.643	100	6.63825	6.16896
hSQ037717	6234	-0.824698	-0.520608	0.631271	0.693814	108.643	100	5.68506	5.16445
hSQ035920	1956	-0.823543	-0.805522	0.978118	0.503822	108.643	100	7.82774	7.02222
hSQ007606	1019	-0.823332	-0.563148	0.683986	0.700955	108.643	100	5.70304	5.13989
hSQ031157	repname(hSQ031157)	-0.823253	-0.563087	0.683979	0.658575	108.643	100	5.71141	5.14833
hSQ025392	60	-0.822896	-0.970542	1.17942	0.520382	108.643	100	8.81255	7.47652
hSQ025392	60	-0.822393	-0.954986	1.16123	0.495849	108.643	100	8.81255	7.47652
hSQ031049	10949	-0.822307	-1.73062	2.10459	0.23098	108.643	100	11.2521	9.52148
hSQ005292	1736	-0.821601	-1.15742	1.40874	0.346991	108.643	100	10.405	9.24756
hSQ024237	1653	-0.821482	-1.14062	1.38849	0.557559	108.643	100	12.546	11.4054
hSQ011212	7332	-0.821006	-0.708521	0.862992	0.577825	108.643	100	5.69735	4.98883
hSQ017120	6170	-0.820993	-0.69814	0.850361	0.627666	108.643	100	5.37126	4.67312
hSQ033332	6772	-0.820939	-0.419774	0.511333	0.74329	108.643	100	8.64297	8.22319
hSQ015799	285362	-0.820746	-0.409096	0.498444	0.756737	108.643	100	4.42416	4.01506
hSQ025392	60	-0.820422	-1.05905	1.29086	0.424027	108.643	100	8.81255	7.47652
hSQ001649	126170	-0.819904	-0.553305	0.674841	0.667669	108.643	100	6.83436	6.28106
hSQ003395	440396	-0.819822	-0.632984	0.772099	0.62542	108.643	100	6.45094	5.81796
hSQ025651	repname(hSQ025651)	-0.819748	-0.713939	0.870924	0.557075	108.643	100	6.78227	6.06833
hSQ029180	9993	-0.819503	-0.442304	0.539722	0.738824	108.643	100	6.20717	5.76487
hSQ042720	84790	-0.819431	-1.77856	2.17048	0.589299	108.643	100	14.0873	12.3087
hSQ025392	60	-0.819381	-0.932051	1.13751	0.515622	108.643	100	8.81255	7.47652
hSQ025392	60	-0.819204	-0.897819	1.09597	0.51684	108.643	100	8.81255	7.47652
hSQ005238	3831	-0.819153	-0.516181	0.63014	0.688504	108.643	100	7.26493	6.74875
hSQ002516	79635	-0.819135	-0.515075	0.628804	0.690718	108.643	100	5.78598	5.2709
hSQ035192	10001	-0.819132	-0.650933	0.794662	0.599385	108.643	100	7.02905	6.37812
hSQ018883	401606	-0.819087	-0.618669	0.755316	0.627742	108.643	100	8.61778	7.99911
hSQ033205	55269	-0.818938	-0.764573	0.933615	0.535939	108.643	100	9.14655	8.38198
hSQ005532	23066	-0.818589	-0.338501	0.413517	0.78947	108.643	100	6.62986	6.29136
hSQ025392	60	-0.817901	-1.04998	1.28375	0.531414	108.643	100	8.81255	7.47652
hSQ008592	51340	-0.817859	-0.61428	0.751082	0.662562	108.643	100	9.39902	8.78474
hSQ043896	3187	-0.817504	-0.476045	0.582315	0.729503	108.643	100	7.99178	7.51574
hSQ024428	55153	-0.817222	-0.605689	0.741157	0.660234	108.643	100	6.86766	6.26198
hSQ034452	26985	-0.817093	-0.77	0.942366	0.533662	108.643	100	8.17038	7.40038
hSQ034502	4211	-0.817036	-0.349947	0.428313	0.786538	108.643	100	5.99941	5.64946
hSQ000767	64216	-0.816757	-0.409159	0.500955	0.74974	108.643	100	6.99067	6.58151
hSQ031740	7341	-0.816676	-0.565038	0.691876	0.652164	108.643	100	5.17435	4.60931
hSQ038895	84321	-0.816619	-0.57339	0.702151	0.694568	108.643	100	7.99056	7.41717
hSQ033707	55334	-0.816338	-0.535356	0.655801	0.688735	108.643	100	5.14113	4.60577
hSQ030336	6281	-0.816076	-0.453658	0.555902	0.72549	108.643	100	5.10752	4.65386
hSQ025392	60	-0.815702	-0.888365	1.08908	0.541168	108.643	100	8.81255	7.47652
hSQ028332	23527	-0.81516	-0.476822	0.584943	0.739319	108.643	100	7.32168	6.84486
hSQ034559	55164	-0.814969	-0.693599	0.851074	0.570077	108.643	100	8.11929	7.42569
hSQ035317	1104	-0.814608	-0.399238	0.490097	0.752123	108.643	100	8.29573	7.89649
hSQ023250	64784	-0.814576	-0.35336	0.433796	0.78001	108.643	100	4.86521	4.51185
hSQ015779	repname(hSQ015779)	-0.814393	-0.482317	0.592241	0.701916	108.643	100	1.97829	1.49597
hSQ042926	23141	-0.81414	-0.634065	0.778816	0.618324	108.643	100	5.76554	5.13148
hSQ038838	57615	-0.813976	-0.695575	0.854539	0.583072	108.643	100	5.50378	4.8082
hSQ043431	6389	-0.813962	-0.576934	0.708797	0.680603	108.643	100	8.81923	8.2423
hSQ005258	5238	-0.813077	-0.468319	0.575983	0.719925	108.643	100	9.08751	8.61919
hSQ016378	23164	-0.81291	-0.477521	0.587422	0.730142	108.643	100	4.98479	4.50727
hSQ025392	60	-0.812577	-1.23843	1.52407	0.310973	108.643	100	8.81255	7.47652
hSQ035625	7013	-0.81256	-0.381276	0.469228	0.767805	108.643	100	5.26027	4.879
hSQ018180	132001	-0.812545	-0.560861	0.690253	0.685783	108.643	100	7.40133	6.84047
hSQ018159	81608	-0.812105	-0.655434	0.80708	0.601138	108.643	100	8.60231	7.94688
hSQ037474	65123	-0.811869	-0.460942	0.567754	0.715708	108.643	100	7.08409	6.62315
hSQ033784	11212	-0.811553	-0.458009	0.564361	0.716069	108.643	100	4.87317	4.41517
hSQ038017	6389	-0.81155	-0.524315	0.646066	0.726197	108.643	100	8.48244	7.96853
hSQ025551	10713	-0.811523	-0.504725	0.621948	0.689842	108.643	100	6.51996	6.01523
hSQ041887	repname(hSQ041887)	-0.811514	-0.380228	0.468542	0.77091	108.643	100	5.6374	5.25717
hSQ016897	23204	-0.811413	-1.18484	1.46021	0.313317	108.643	100	9.06738	7.88254
hSQ034859	5889	-0.811386	-0.67004	0.825796	0.599054	108.643	100	6.03199	5.36195
hSQ008410	51260	-0.811149	-0.527108	0.649829	0.67617	108.643	100	6.8476	6.32049
hSQ016259	23428	-0.811083	-0.730034	0.900073	0.636474	108.643	100	6.25621	5.52618
hSQ012094	25832	-0.811082	-0.475199	0.585883	0.713023	108.643	100	4.62633	4.15113
hSQ013554	10507	-0.810883	-0.402527	0.496406	0.758101	108.643	100	5.62719	5.22466
hSQ044428	1837	-0.810846	-0.456094	0.562492	0.728204	108.643	100	5.96244	5.50635
hSQ004937	7290	-0.810398	-0.856099	1.05639	0.47354	108.643	100	5.25591	4.39981
hSQ005585	55732	-0.810231	-0.557477	0.688047	0.701196	108.643	100	7.80885	7.25137
hSQ037857	6389	-0.810153	-0.504379	0.622573	0.708748	108.643	100	8.79197	8.28759
hSQ010676	55298	-0.810091	-0.548006	0.676475	0.670461	108.643	100	5.87058	5.32257
hSQ040531	4240	-0.809895	-0.516844	0.638162	0.679402	108.643	100	6.34268	5.82584
hSQ034470	4718	-0.809877	-1.22172	1.50853	0.32348	108.643	100	7.74937	6.52764
hSQ025392	60	-0.809718	-0.93061	1.1493	0.512406	108.643	100	8.81255	7.47652
hSQ017582	51317	-0.809437	-0.418191	0.516645	0.742159	108.643	100	5.37062	4.95243
hSQ037613	8233	-0.809391	-0.37449	0.462681	0.770168	108.643	100	4.66147	4.28698
hSQ034849	57592	-0.809319	-1.89329	2.33936	0.152646	108.643	100	7.79782	5.90453
hSQ037269	80131	-0.8091	-0.633297	0.782717	0.611139	108.643	100	7.47298	6.83968
hSQ041692	51496	-0.808976	-0.597092	0.738083	0.704783	108.643	100	6.03799	5.4409
hSQ008398	10773	-0.808851	-0.505384	0.624817	0.690345	108.643	100	5.61989	5.11451
hSQ000901	84271	-0.808419	-0.403167	0.49871	0.760477	108.643	100	6.82979	6.42663
hSQ025392	60	-0.808034	-0.916068	1.1337	0.531362	108.643	100	8.81255	7.47652
hSQ036477	400652	-0.80676	-0.808571	1.00224	0.677875	108.643	100	6.41388	5.60531
hSQ012721	9620	-0.806739	-0.83671	1.03715	0.486362	108.643	100	5.71923	4.88252
hSQ037358	3202	-0.806529	-0.507658	0.629436	0.69995	108.643	100	4.93941	4.43175
hSQ025392	60	-0.806289	-0.96933	1.20221	0.505353	108.643	100	8.81255	7.47652
hSQ026418	2632	-0.806126	-0.771949	0.957604	0.55176	108.643	100	9.00838	8.23643
hSQ043827	389322	-0.806041	-0.739118	0.916972	0.55042	108.643	100	9.29439	8.55527
hSQ029482	373156	-0.8059	-0.528336	0.655585	0.689276	108.643	100	4.83462	4.30629
hSQ020988	64215	-0.805767	-0.801421	0.994607	0.511926	108.643	100	7.49863	6.69721
hSQ034389	388132	-0.80497	-1.21563	1.51016	0.46083	108.643	100	7.21844	6.00281
hSQ042680	116987	-0.804806	-0.369965	0.459695	0.770737	108.643	100	4.95266	4.58269
hSQ025392	60	-0.80459	-0.977146	1.21446	0.464753	108.643	100	8.81255	7.47652
hSQ008589	55254	-0.804427	-0.544865	0.677333	0.679283	108.643	100	6.05632	5.51145
hSQ025392	60	-0.804335	-0.919223	1.14284	0.518816	108.643	100	8.81255	7.47652
hSQ025392	60	-0.803727	-1.06841	1.32932	0.409293	108.643	100	8.81255	7.47652
hSQ031907	23095	-0.803506	-0.467331	0.581615	0.736198	108.643	100	7.84226	7.37493
hSQ025392	60	-0.803342	-1.01752	1.2666	0.506382	108.643	100	8.81255	7.47652
hSQ024200	64682	-0.80293	-0.525106	0.653987	0.6964	108.643	100	7.14591	6.62081
hSQ002362	341412	-0.802554	-0.990098	1.23368	0.472638	108.643	100	5.51792	4.52782
hSQ024737	79172	-0.802289	-0.417442	0.520314	0.746989	108.643	100	4.80877	4.39133
hSQ037087	57412	-0.801979	-0.618609	0.771353	0.689366	108.643	100	6.40492	5.78631
hSQ028623	79175	-0.801734	-0.335729	0.418754	0.791347	108.643	100	4.72163	4.3859
hSQ025392	60	-0.801616	-0.918341	1.14561	0.543864	108.643	100	8.81255	7.47652
hSQ015899	89910	-0.801377	-0.354994	0.44298	0.781955	108.643	100	5.50564	5.15064
hSQ005091	220717	-0.801353	-1.50957	1.88377	0.622622	108.643	100	8.7719	7.26233
hSQ009032	23376	-0.801155	-0.369856	0.461653	0.771353	108.643	100	7.08108	6.71122
hSQ024487	115	-0.800704	-0.445855	0.556829	0.722397	108.643	100	5.6838	5.23794
hSQ037784	23344	-0.800457	-0.872721	1.09028	0.456996	108.643	100	9.02097	8.14825
hSQ021067	126917	-0.800446	-0.456239	0.569981	0.721021	108.643	100	8.12017	7.66393
hSQ032119	7155	-0.80038	-1.44589	1.80651	0.239774	108.643	100	11.7384	10.2925
hSQ025499	11231	-0.800005	-0.621689	0.777107	0.620518	108.643	100	8.05514	7.43346
hSQ036521	9172	-0.799737	-0.579516	0.724633	0.648859	108.643	100	6.08207	5.50255
hSQ004500	repname(hSQ004500)	-0.799506	-0.479273	0.599461	0.702185	108.643	100	2.26408	1.94944
hSQ014484	375484	-0.799084	-0.608254	0.761189	0.645416	108.643	100	6.25544	5.64718
hSQ011222	4566::4555	-0.799059	-0.350852	0.439081	0.781367	108.643	100	3.8175	3.46665
hSQ025392	60	-0.798875	-0.886351	1.1095	0.559585	108.643	100	8.81255	7.47652
hSQ036787	4513	-0.798809	-1.13223	1.4174	0.577095	108.643	100	5.07404	3.94181
hSQ006702	346643	-0.798768	-1.21127	1.51643	0.676105	108.643	100	6.16098	4.94971
hSQ014766	1024	-0.798708	-0.39602	0.495825	0.753584	108.643	100	6.12889	5.73287
hSQ021191	8073	-0.798486	-0.497389	0.622915	0.694484	108.643	100	5.32899	4.8316
hSQ011911	6296	-0.798454	-0.895055	1.12099	0.484938	108.643	100	4.69985	3.8048
hSQ021443	7534	-0.797716	-0.910808	1.14177	0.474123	108.643	100	8.48812	7.56359
hSQ025392	60	-0.79719	-1.45012	1.81903	0.23907	108.643	100	8.81255	7.47652
hSQ042439	repname(hSQ042439)	-0.796614	-0.461564	0.579408	0.714496	108.643	100	4.74843	4.28686
hSQ037096	23013	-0.796436	-0.582177	0.730979	0.680533	108.643	100	5.93897	5.35679
hSQ017129	51018	-0.795995	-0.713762	0.896691	0.56887	108.643	100	7.40763	6.69387
hSQ007128	29093	-0.79501	-0.548869	0.690392	0.669439	108.643	100	6.78956	6.24069
hSQ044943	51307	-0.79479	-0.553645	0.696593	0.662699	108.643	100	5.26988	4.71624
hSQ012836	998	-0.79419	-0.729972	0.91914	0.652462	108.643	100	7.52198	6.79201
hSQ009294	4324	-0.793571	-0.397786	0.501261	0.762547	108.643	100	6.85594	6.45815
hSQ003549	56252	-0.793429	-0.424752	0.535338	0.75664	108.643	100	6.88116	6.4564
hSQ001521	9987	-0.793212	-1.54761	1.95107	0.409536	108.643	100	12.7263	11.1787
hSQ029730	92017	-0.792853	-0.626319	0.789956	0.615164	108.643	100	6.83665	6.21033
hSQ025392	60	-0.792707	-0.803381	1.01346	0.55861	108.643	100	8.81255	7.47652
hSQ002555	567	-0.792556	-0.596258	0.752324	0.643217	108.643	100	4.99261	4.69288
hSQ018983	1875	-0.792296	-0.470984	0.594455	0.732628	108.643	100	4.77847	4.30749
hSQ043832	64506	-0.792141	-0.460492	0.581326	0.723583	108.643	100	6.04664	5.58615
hSQ015877	23510	-0.792123	-0.356769	0.450396	0.784816	108.643	100	5.05597	4.6992
hSQ038017	6389	-0.792081	-0.551557	0.696339	0.717086	108.643	100	8.48244	7.96853
hSQ025392	60	-0.79157	-0.928963	1.17357	0.51441	108.643	100	8.81255	7.47652
hSQ018125	51091	-0.791116	-0.922209	1.16571	0.514213	108.643	100	4.71033	3.78812
hSQ026526	55571	-0.790834	-0.296722	0.375202	0.814678	108.643	100	6.0128	5.71608
hSQ005797	3983	-0.790824	-0.364182	0.460509	0.78093	108.643	100	5.30155	4.93737
hSQ009252	8815	-0.790758	-0.577319	0.730083	0.647696	108.643	100	5.27288	4.69556
hSQ040757	28971	-0.790646	-0.392264	0.49613	0.765412	108.643	100	4.719	4.32674
hSQ002555	567	-0.790583	-0.628767	0.795321	0.620532	108.643	100	4.99261	4.69288
hSQ043926	55204	-0.790557	-0.525347	0.664528	0.72526	108.643	100	7.65479	7.12944
hSQ008835	6389	-0.790529	-0.574522	0.726756	0.641229	108.643	100	8.87107	8.29655
hSQ000085	79191	-0.790513	-0.358343	0.453304	0.777365	108.643	100	5.66852	5.31018
hSQ043894	6789	-0.79042	-0.331597	0.41952	0.794719	108.643	100	5.50686	5.17526
hSQ025392	60	-0.790211	-1.25603	1.58949	0.298971	108.643	100	8.81255	7.47652
hSQ042314	23499	-0.790165	-0.789863	0.999618	0.517698	108.643	100	5.80305	5.01319
hSQ028361	7536	-0.789792	-1.0337	1.30882	0.528557	108.643	100	8.91077	7.87707
hSQ037140	23246	-0.789725	-0.487346	0.617109	0.730716	108.643	100	8.24715	7.7598
hSQ021874	1845	-0.789446	-0.40992	0.51925	0.760726	108.643	100	4.27358	3.86366
hSQ011944	51535	-0.789402	-0.453129	0.574015	0.727313	108.643	100	7.66868	7.21555
hSQ033903	55069	-0.789378	-0.391357	0.49578	0.768373	108.643	100	4.0746	3.68324
hSQ011796	55122	-0.789316	-0.61083	0.773872	0.621152	108.643	100	5.99756	5.38673
hSQ013290	repname(hSQ013290)	-0.789122	-0.958199	1.21426	0.406059	108.643	100	2.38507	2.17737
hSQ040349	3187	-0.788956	-0.53422	0.677123	0.675973	108.643	100	8.95819	8.42397
hSQ025392	60	-0.788866	-0.924488	1.17192	0.522291	108.643	100	8.81255	7.47652
hSQ038017	6389	-0.788792	-0.484086	0.613706	0.736176	108.643	100	8.48244	7.96853
hSQ017390	113878	-0.788414	-0.49702	0.630404	0.709582	108.643	100	6.43201	5.93499
hSQ022944	134353	-0.78834	-1.86321	2.36347	0.0936217	108.643	100	6.05904	4.19583
hSQ019749	10066	-0.788263	-0.367429	0.466124	0.770859	108.643	100	5.84073	5.4733
hSQ033260	85460	-0.788037	-0.503459	0.638877	0.687129	108.643	100	5.6826	5.17914
hSQ025764	23678	-0.787784	-0.319244	0.405243	0.800319	108.643	100	4.55772	4.23848
hSQ042990	80777	-0.7875	-0.703066	0.892782	0.573969	108.643	100	6.41689	5.71382
hSQ023810	200894	-0.787031	-0.544901	0.692351	0.664043	108.643	100	5.14993	4.60503
hSQ000525	9786	-0.787023	-0.557479	0.708339	0.680544	108.643	100	7.872	7.31452
hSQ001923	51538	-0.787002	-0.558912	0.710179	0.650053	108.643	100	4.47678	3.91787
hSQ037222	353376	-0.786908	-0.534831	0.679661	0.701981	108.643	100	5.5135	4.97867
hSQ011149	3609	-0.786615	-0.449291	0.57117	0.751425	108.643	100	7.59373	7.14444
hSQ001629	10424	-0.786543	-0.478287	0.608087	0.727862	108.643	100	4.15184	3.67355
hSQ030325	5583	-0.786539	-0.454381	0.577697	0.716851	108.643	100	5.94449	5.49011
hSQ032653	79039	-0.786304	-0.460298	0.585395	0.713282	108.643	100	7.95746	7.49716
hSQ045398	27072	-0.785873	-0.368824	0.469318	0.769896	108.643	100	6.57323	6.2044
hSQ003015	6744	-0.785593	-0.45858	0.583738	0.714483	108.643	100	3.89937	3.44079
hSQ040039	10741	-0.785321	-0.982931	1.25163	0.435889	108.643	100	4.35075	3.36782
hSQ028004	9867	-0.784928	-0.51465	0.655665	0.686537	108.643	100	9.0178	8.50315
hSQ035368	2071	-0.78485	-0.393376	0.501212	0.759148	108.643	100	6.24324	5.84987
hSQ008289	9052	-0.784548	-0.542996	0.692113	0.659808	108.643	100	7.63976	7.09677
hSQ002555	567	-0.784349	-0.589201	0.751197	0.640133	108.643	100	4.99261	4.69288
hSQ040393	80024	-0.783927	-0.685496	0.874439	0.571162	108.643	100	5.18295	4.49745
hSQ008645	54800	-0.783707	-0.688681	0.878749	0.582464	108.643	100	7.03171	6.34303
hSQ025392	60	-0.783707	-1.28636	1.64138	0.311478	108.643	100	8.81255	7.47652
hSQ016009	30844	-0.78361	-0.558734	0.713025	0.702526	108.643	100	7.63864	7.07991
hSQ039495	114088	-0.783588	-0.477011	0.608753	0.704058	108.643	100	6.75097	6.27396
hSQ033792	11128	-0.783127	-0.995966	1.27178	0.381262	108.643	100	8.58055	7.58458
hSQ011120	repname(hSQ011120)	-0.782479	-0.534297	0.682825	0.69221	108.643	100	6.68548	6.15118
hSQ026733	3980	-0.782149	-0.596503	0.762645	0.666122	108.643	100	7.74872	7.15222
hSQ025392	60	-0.782116	-1.04452	1.3355	0.446391	108.643	100	8.81255	7.47652
hSQ020897	4738	-0.781819	-0.440185	0.563026	0.742677	108.643	100	5.3006	4.86042
hSQ026226	10283	-0.781753	-0.547602	0.700479	0.699963	108.643	100	6.88146	6.33386
hSQ025392	60	-0.781638	-0.860768	1.10124	0.53998	108.643	100	8.81255	7.47652
hSQ004918	285830	-0.781301	-1.09839	1.40585	0.41674	108.643	100	6.24858	5.15018
hSQ032911	80020	-0.781112	-0.486294	0.622566	0.704019	108.643	100	6.04211	5.55581
hSQ036336	284252	-0.780463	-0.388569	0.497869	0.771079	108.643	100	5.15365	4.76508
hSQ025392	60	-0.780317	-0.910222	1.16648	0.534659	108.643	100	8.81255	7.47652
hSQ013693	55104	-0.78024	-0.763532	0.978585	0.541653	108.643	100	3.7427	2.97916
hSQ036215	5915	-0.780009	-0.533564	0.684048	0.729068	108.643	100	6.13322	5.59966
hSQ041828	1933	-0.779092	-0.802329	1.02983	0.665947	108.643	100	7.08951	6.28718
hSQ023535	3308	-0.778966	-0.995376	1.27782	0.389424	108.643	100	11.7019	10.7066
hSQ025392	60	-0.778901	-0.870679	1.11783	0.534174	108.643	100	8.81255	7.47652
hSQ016751	2778	-0.778654	-1.39875	1.79637	0.309831	108.643	100	10.0221	8.62334
hSQ009612	79649	-0.778372	-0.523194	0.672164	0.675314	108.643	100	6.79663	6.27344
hSQ038891	6509	-0.778348	-0.713756	0.917013	0.575656	108.643	100	7.3448	6.63104
hSQ041781	392487	-0.778048	-0.91899	1.18115	0.495843	108.643	100	5.22444	4.30545
hSQ017917	9150	-0.778038	-0.550596	0.707672	0.653839	108.643	100	8.18327	7.63267
hSQ024301	339991	-0.777256	-0.919643	1.18319	0.515722	108.643	100	9.90923	8.98959
hSQ003032	57621	-0.777118	-0.451953	0.581576	0.721514	108.643	100	4.1789	3.72695
hSQ003278	148479	-0.777	-0.484881	0.624042	0.703359	108.643	100	6.87204	6.38716
hSQ017313	54707	-0.776492	-0.336727	0.433651	0.789123	108.643	100	6.67557	6.33885
hSQ007896	3397	-0.776328	-0.620574	0.799372	0.6096	108.643	100	5.67343	5.05286
hSQ020379	79009	-0.776277	-0.351149	0.45235	0.780649	108.643	100	7.06095	6.7098
hSQ027968	64093	-0.776193	-1.15915	1.49337	0.337835	108.643	100	8.4483	7.28915
hSQ032318	54567	-0.775944	-0.856092	1.10329	0.506454	108.643	100	6.77576	5.91967
hSQ025392	60	-0.775886	-0.962109	1.24001	0.485217	108.643	100	8.81255	7.47652
hSQ035885	5584	-0.775615	-0.558702	0.720335	0.65921	108.643	100	6.5816	6.0229
hSQ020770	23403	-0.775569	-0.518578	0.668641	0.694212	108.643	100	4.48046	3.96188
hSQ031789	9604	-0.775494	-0.388296	0.500708	0.767761	108.643	100	4.94632	4.55802
hSQ038920	84886	-0.774841	-0.664465	0.85755	0.612758	108.643	100	6.46165	5.79719
hSQ022043	55388	-0.774691	-0.560861	0.723981	0.702199	108.643	100	8.19285	7.63199
hSQ014492	26136	-0.774447	-0.525773	0.678901	0.684627	108.643	100	6.65155	6.12578
hSQ021443	7534	-0.774407	-0.857239	1.10696	0.5267	108.643	100	8.48812	7.56359
hSQ002826	6838	-0.774317	-0.489165	0.631737	0.695007	108.643	100	8.48197	7.99281
hSQ035731	9878	-0.774279	-0.416304	0.537667	0.739991	108.643	100	6.71518	6.29888
hSQ017748	84524	-0.774261	-0.371498	0.47981	0.774278	108.643	100	5.32509	4.95359
hSQ003158	9868	-0.773955	-0.481696	0.622382	0.710388	108.643	100	10.1696	9.68791
hSQ015876	10240	-0.773822	-0.671858	0.868233	0.593392	108.643	100	8.88299	8.21113
hSQ028942	7335::387522	-0.773334	-0.70283	0.908831	0.563796	108.643	100	6.0894	5.521
hSQ025392	60	-0.773314	-1.18378	1.53078	0.325745	108.643	100	8.81255	7.47652
hSQ025392	60	-0.773196	-1.20441	1.55771	0.318433	108.643	100	8.81255	7.47652
hSQ010838	442204	-0.772771	-0.479638	0.620673	0.700644	108.643	100	5.81752	5.33788
hSQ025392	60	-0.772189	-0.871784	1.12898	0.54641	108.643	100	8.81255	7.47652
hSQ043155	392	-0.772011	-0.414664	0.537122	0.758999	108.643	100	7.60084	7.18618
hSQ010503	150776	-0.771963	-0.655633	0.849306	0.618464	108.643	100	6.34643	5.6908
hSQ014001	23523	-0.77177	-0.408804	0.529697	0.746286	108.643	100	6.15397	5.74516
hSQ011463	8462	-0.771578	-0.395395	0.512449	0.760855	108.643	100	5.05211	4.65672
hSQ025851	115209	-0.771539	-0.618981	0.802268	0.617981	108.643	100	6.22286	5.60388
hSQ039097	9557	-0.770866	-0.394507	0.511771	0.763314	108.643	100	5.82057	5.42606
hSQ023002	7247	-0.770698	-0.572609	0.742975	0.639336	108.643	100	6.66459	6.09198
hSQ024315	26259	-0.770444	-0.824224	1.0698	0.483528	108.643	100	6.43404	5.60981
hSQ000038	400961	-0.769428	-0.541471	0.703732	0.665943	108.643	100	3.88625	3.34477
hSQ045472	9057	-0.769236	-0.345291	0.448875	0.783924	108.643	100	5.44542	5.10013
hSQ031913	10106	-0.768832	-0.324283	0.421786	0.796615	108.643	100	3.58277	3.25849
hSQ001414	6429	-0.76882	-0.683551	0.889092	0.655554	108.643	100	9.62085	8.93729
hSQ025392	60	-0.768455	-0.878851	1.14366	0.52395	108.643	100	8.81255	7.47652
hSQ001105	5546	-0.768062	-0.685728	0.892803	0.64872	108.643	100	6.5052	5.81947
hSQ042242	7311	-0.768029	-0.735673	0.957871	0.69628	108.643	100	6.79186	6.05619
hSQ028144	6256	-0.767992	-0.44177	0.575227	0.751328	108.643	100	4.43233	3.99056
hSQ021309	3251	-0.767866	-0.657975	0.856888	0.61484	108.643	100	5.88765	5.22968
hSQ003139	7812	-0.767376	-0.848788	1.10609	0.479489	108.643	100	6.68769	5.83891
hSQ012193	8693	-0.766601	-0.39738	0.518366	0.751646	108.643	100	5.33635	4.93897
hSQ021804	84837	-0.766544	-0.6111	0.797216	0.624517	108.643	100	3.56246	2.95136
hSQ025867	51574	-0.766376	-0.432281	0.564059	0.729118	108.643	100	7.02058	6.5883
hSQ035304	114884	-0.766001	-0.667887	0.871914	0.593171	108.643	100	6.32708	5.65919
hSQ044380	65056	-0.765739	-0.586424	0.765827	0.649618	108.643	100	5.22298	4.63655
hSQ031337	9917	-0.765719	-0.456917	0.596716	0.745045	108.643	100	4.10216	3.64524
hSQ025997	51560	-0.765611	-1.11572	1.45729	0.341408	108.643	100	6.42504	5.30932
hSQ036015	6139	-0.765431	-1.1157	1.45761	0.548688	108.643	100	7.98878	6.87309
hSQ012086	388416	-0.765413	-0.745073	0.973427	0.539365	108.643	100	5.95491	5.20983
hSQ024369	91304	-0.765237	-0.395865	0.51731	0.7543	108.643	100	4.43205	4.03618
hSQ038017	6389	-0.76509	-0.51022	0.666876	0.737746	108.643	100	8.48244	7.96853
hSQ006087	3251	-0.765065	-0.852435	1.1142	0.463654	108.643	100	7.17227	6.31983
hSQ020149	55827	-0.765018	-0.348558	0.455621	0.781545	108.643	100	5.04859	4.70003
hSQ030693	11276	-0.764992	-0.576167	0.753168	0.66525	108.643	100	7.51929	6.94312
hSQ033660	repname(hSQ033660)	-0.7648	-0.644286	0.842425	0.624872	108.643	100	8.99803	8.35375
hSQ019649	657	-0.76384	-0.462519	0.605518	0.732883	108.643	100	4.79268	4.33016
hSQ015146	154661	-0.763814	-0.418887	0.548415	0.741505	108.643	100	6.32382	5.90494
hSQ032916	23022	-0.763345	-0.512615	0.671538	0.681948	108.643	100	6.90411	6.3915
hSQ007343	23395	-0.763236	-0.622912	0.816146	0.610101	108.643	100	8.4819	7.85898
hSQ025392	60	-0.763181	-0.993067	1.30122	0.445523	108.643	100	8.81255	7.47652
hSQ017098	57169	-0.763004	-0.92538	1.21281	0.515891	108.643	100	6.95805	6.03267
hSQ021091	6231	-0.762702	-1.06832	1.4007	0.507539	108.643	100	6.66509	5.59677
hSQ002204	5691	-0.762531	-0.622346	0.816159	0.613587	108.643	100	7.56671	6.94437
hSQ021299	6189	-0.762505	-0.8968	1.17612	0.564497	108.643	100	6.21893	5.32213
hSQ026771	81552	-0.762309	-0.380963	0.499749	0.765607	108.643	100	4.22451	3.84354
hSQ004311	6389	-0.762126	-0.531712	0.69767	0.70503	108.643	100	8.67578	8.14407
hSQ034523	29904	-0.762106	-0.382455	0.50184	0.772568	108.643	100	5.93283	5.55037
hSQ032589	390533	-0.762064	-0.700124	0.918721	0.582162	108.643	100	5.93335	5.23322
hSQ025392	60	-0.761951	-0.928345	1.21838	0.512574	108.643	100	8.81255	7.47652
hSQ043975	400	-0.761706	-0.362827	0.476335	0.77414	108.643	100	6.38804	6.02521
hSQ006677	5691	-0.761011	-1.35465	1.78007	0.310266	108.643	100	10.1549	8.80025
hSQ017839	57722	-0.76094	-0.437206	0.57456	0.75625	108.643	100	3.09677	2.65956
hSQ021128	3984	-0.760665	-0.576031	0.757273	0.657269	108.643	100	5.11317	4.53714
hSQ004822	81037	-0.760653	-0.346355	0.455338	0.790992	108.643	100	4.88663	4.54027
hSQ041716	23592	-0.760601	-0.551854	0.725549	0.702485	108.643	100	6.58539	6.03354
hSQ023771	84918	-0.760538	-0.502435	0.660631	0.690505	108.643	100	5.13665	4.63421
hSQ016795	60526	-0.760222	-0.53972	0.709951	0.699201	108.643	100	5.61506	5.07534
hSQ010189	27350	-0.759921	-0.721166	0.949001	0.54767	108.643	100	6.71935	5.99819
hSQ039113	81555	-0.759829	-0.516731	0.680062	0.712731	108.643	100	6.92633	6.4096
hSQ031609	79618	-0.759733	-0.500569	0.658875	0.73157	108.643	100	4.92238	4.42181
hSQ042550	64778	-0.759697	-0.607546	0.799722	0.685273	108.643	100	6.08992	5.48238
[truncated: 16,730 more rows]
