# Supplementary material for: Concordant Regulation of Translation and mRNA Abundance for Hundreds of Targets of a Human microRNA
Source: PLoS Biol. 2009 Nov 10;7(11):e1000238. doi: 10.1371/journal.pbio.1000238 (PMC2766070; doi:10.1371/journal.pbio.1000238)
Supplement: Dataset S5 — Compendium of miR-124 data used for most analyses. (5.14 MB XLS) [file pbio.1000238.s005.xls]

## Sheet: key
gene_id	HEEBO microarray identifier
refseq
gene_symbol
entrez_id
IP_Score.d.	D score from SAM. Similar to t-score. From Dataset S1
IP_q.value	q-value False-Discovery Rate (FDR) from SAM. From Dataset S1
IP_localfdr	local FDR from SAM. From Dataset S1
IP_group1_mean	mean_value_group1_sam_input -- Ago IP mock transfected cells. From Dataset S1
IP_group2_mean	mean_value_group2_sam_input -- Ago IP miR-124 transfected cells. From Dataset S1
exp_Score.d.	From Dataset S2
exp_q.value	From Dataset S2
exp_localfdr	From Dataset S2
exp_group1_mean	mean_value_group1_sam_input -- mRNA expression profile from mock transfected cells. From Dataset S2
exp_group2_mean	mean_value_group2_sam_input -- mRNA expression profile from miR-124 transfected cells. From Dataset S2
occ_Score.d.	From Dataset S3
occ_q.value	From Dataset S3
occ_localfdr	From Dataset S3
occ_group1_mean	mean_value_group1_sam_input -- ribosome occupancy from mock transfected cells. From Dataset S3
occ_group2_mean	mean_value_group2_sam_input -- ribosome occupancy from miR-124 transfected cells. From Dataset S3
Ribnumber_Score.d.	From Dataset S4
Ribnumber_q.value	From Dataset S4
Ribnumber_localfdr	From Dataset S4
Ribnumber_group1_mean	mean_value_group1_sam_input -- ribosome occupancy from mock transfected cells. From Dataset S4
Ribnumber_group2_mean	mean_value_group2_sam_input -- ribosome occupancy from miR-124 transfected cells. From Dataset S4
3UTR_6mer2_7	3'-UTR 6mer_n2-7 seed match
3UTR_6mer3_8	3'-UTR 6mer_n3-8 seed match
3UTR_7merm8	3'-UTR 7mer-m8 seed match
3UTR_7merA1	3'-UTR 7mer-A1 seed match
3UTR_8mer	3'-UTR 8mer seed match
CDS_6mer2_7	coding sequence 6mer_n2-7 seed match
CDS_6mer3_8	coding sequence 6mer_n3-8 seed match
CDS_7merm8	coding sequence 7mer-m8 seed match
CDS_7merA1	coding sequence 7mer-A1 seed match
CDS_8mer	coding sequence 8mer seed match
5UTR_6mer2_7	5'-UTR 6mer_n2-7 seed match
5UTR_6mer3_8	5'-UTR 6mer_n3-8 seed match
5UTR_7merm8	5'-UTR 7mer-m8 seed match
5UTR_7merA1	5'-UTR 7mer-A1 seed match
5UTR_8mer	5'-UTR 8mer seed match
length_3utr
length_cds
length_5utr
IP_mean_foldchange
Abundance_mean_foldchange
occupancy_mean_foldchange
Ribnumber_mean_foldchange

## Sheet: Dataset_S5
gene_id	refseq	gene_symbol	entrez_id	IP_Score.d.	IP_q.value	IP_localfdr	IP_group1_mean	IP_group2_mean	exp_Score.d.	exp_q.value	exp_localfdr	exp_group1_mean	exp_group2_mean	occ_Score.d.	occ_q.value	occ_localfdr	occ_group1_mean	occ_group2_mean	Ribnumber_Score.d.	Ribnumber_q.value	Ribnumber_localfdr	Ribnumber_group1_mean	Ribnumber_group2_mean	3UTR_6mer2_7	3UTR_6mer3_8	3UTR_7merm8	3UTR_7merA1	3UTR_8mer	CDS_6mer2_7	CDS_6mer3_8	CDS_7merm8	CDS_7merA1	CDS_8mer	5UTR_6mer2_7	5UTR_6mer3_8	5UTR_7merm8	5UTR_7merA1	5UTR_8mer	length_3utr	length_cds	length_5utr	IP_mean_foldchange	Abundance_mean_foldchange	occupancy_mean_foldchange	Ribnumber_mean_foldchange
hSQ023086	NM_022365	DNAJC1	64215	7.79	0	0	0.41	5.81	-8	0	2.39	2.07	-0.94	-3.7	9.63	15.93	0.95	0.84	-2.91	19.19	31.93	8.69	6.78	1	1	1	1	1	1	0	0	1	0	0	0	0	0	0	138	1665	287	5.4	-3.02	0.89	0.78
hSQ020988	NM_022365	DNAJC1	64215	7.33	0	0	-1.7	3.83	-3.78	0	0.59	0.08	-1.78	-0.58	21.69	53.5	0.82	0.77	-0.81	108.64	100	7.5	6.7	1	1	1	1	1	1	0	0	1	0	0	0	0	0	0	138	1665	287	5.53	-1.87	0.94	0.89
hSQ017090	NM_001010875	SLC25A30	253512	7.13	0	0	-1.27	3.34	-3.57	0	0.29	0.72	-1.02	-2.84	14.69	20.03	0.85	0.74	-1.85	34.95	64.25	4.76	3.66	0	0	0	0	0	0	0	0	0	0	0	0	0	0	0	65	876	136	4.61	-1.74	0.88	0.77
hSQ008501	NM_005646	TARBP1	6894	7.07	0	0	0.46	5.08	-1.54	11.29	52.52	0.69	0.06	-2.05	14.69	28.57	0.93	0.87	-2.26	34.95	45.71	5.23	3.98	2	2	2	1	1	1	1	0	0	0	NA	NA	NA	NA	NA	262	4866	NA	4.62	-0.64	0.94	0.76
hSQ037593	NM_006016	CD164	8763	6.79	0	0	0.78	5.62	-7.06	0	1.98	1.34	-1.79	-10.4	0	15.08	0.97	0.76	-2.26	34.95	45.81	6.66	4.21	3	2	2	2	2	0	0	0	0	0	0	0	0	0	0	2331	594	66	4.84	-3.13	0.79	0.63
hSQ030942	NM_003432	ZNF131	7690	6.53	0	0	-0.85	3.43	-0.99	43.3	94.68	0.16	-0.37	0.53	29.81	60.76	0.75	0.78	-0.34	108.64	100	5.05	4.84	0	0	0	0	0	1	0	0	0	0	NA	NA	NA	NA	NA	586	1770	NA	4.29	-0.53	1.04	0.96
hSQ029144	NM_002306	LGALS3	3958	6.31	0	0	-1.71	3.77	-0.16	92.38	100	-2.44	-2.55	0	29.81	60	0.94	0.94	0.23	108.17	100	5.55	5.76	0	0	0	0	0	3	2	1	1	1	0	0	0	0	0	158	753	151	5.48	-0.11	1	1.04
hSQ025319	NM_004099	STOM	2040	6.28	0	0	0.19	4.07	-2.17	4.63	16.22	-1.2	-2.29	-2.52	14.69	22.91	0.95	0.88	-0.86	108.64	100	5.54	5.05	2	1	1	1	1	0	0	0	0	0	0	0	0	0	0	2126	867	80	3.88	-1.09	0.93	0.91
hSQ014142	NM_014397	NEK6	10783	6.22	0	0	0.24	4.96	-2.4	2.6	8.91	0.03	-1.06	0.11	29.81	60.56	0.83	0.83	-0.03	108.64	100	4.21	4.19	2	1	1	2	1	0	0	0	0	0	0	0	0	0	0	1491	942	145	4.72	-1.09	1.01	1
hSQ023469	NA	OR7E47P	26628	6.14	0	0	0.37	5.63	-1.49	13.85	56.45	1.45	0.6	0.62	29.81	60.37	0.58	0.72	0.36	108.17	100	2.38	2.59	NA	NA	NA	NA	NA	NA	NA	NA	NA	NA	NA	NA	NA	NA	NA	NA	NA	NA	5.25	-0.85	1.25	1.09
hSQ015907	NA	OR7E104P	81137	6.1	0	0	0.19	5.55	-1.86	5.84	31	1.31	0.36	0.67	29.81	60.11	0.57	0.73	0.38	108.17	100	2.35	2.55	NA	NA	NA	NA	NA	NA	NA	NA	NA	NA	NA	NA	NA	NA	NA	NA	NA	NA	5.36	-0.95	1.27	1.09
hSQ041112	NM_006479	RAD51AP1	10635	6.09	0	0	-0.97	3.11	-2.09	4.63	19.23	0.71	-0.44	-1.74	14.69	33.31	0.89	0.83	-0.63	108.64	100	5.36	4.98	1	1	1	0	0	0	0	0	0	0	0	0	0	0	0	1055	1008	50	4.07	-1.16	0.94	0.93
hSQ027663	NM_001077269	WIPF1	7456	6.08	0	0	0.88	5.33	-4.91	0	1.96	-1.32	-3.7	-1.95	14.69	29.94	0.93	0.86	-1.35	56.69	92.01	4.88	4.09	3	2	1	1	1	2	2	2	0	0	0	0	0	0	0	2972	1512	164	4.45	-2.38	0.92	0.84
hSQ015940	NA	TWIST2	117581	6.07	0	0	0.25	5.4	-4.01	0	0.97	-1.07	-2.84	-1.08	14.69	44.99	0.86	0.79	0.04	108.17	100	3.51	3.54	NA	NA	NA	NA	NA	NA	NA	NA	NA	NA	NA	NA	NA	NA	NA	NA	NA	NA	5.15	-1.76	0.91	1.01
hSQ028469	NM_024033	C7orf49	78996	5.94	0	0	1.32	5.29	-1.76	7.95	37.16	1.67	0.94	-3.77	9.63	15.78	0.93	0.87	0.23	108.17	100	4.54	4.68	1	1	1	0	0	0	0	0	0	0	0	0	0	0	0	826	390	266	3.96	-0.73	0.94	1.03
hSQ012695	NM_020648	TWSG1	57045	5.84	0	0	-1.06	4.19	-3.93	0	0.84	-0.75	-3.3	-0.72	19.17	51.26	0.82	0.78	-0.27	108.64	100	3.96	3.7	3	2	2	0	0	0	0	0	0	0	0	0	0	0	0	2892	672	105	5.25	-2.55	0.96	0.94
hSQ013394	NM_003870	IQGAP1	8826	5.82	0	0	-1.26	3.11	-2.94	1.97	1.23	-2.21	-3.63	0.38	29.81	61.06	0.76	0.79	-1.8	34.95	67.08	5.32	4.28	4	2	2	1	1	3	1	0	1	0	0	0	0	0	0	2135	4974	101	4.37	-1.42	1.05	0.8
hSQ031984	NM_003068	SNAI2	6591	5.81	0	0	2.32	6	-5.22	0	2.07	0.26	-1.96	-2.18	14.69	26.82	0.6	0.43	-2.02	34.95	55.71	3.93	2.92	3	3	3	1	1	0	0	0	0	0	0	0	0	0	0	1123	807	164	3.68	-2.22	0.72	0.74
hSQ036881	NM_012434	SLC17A5	26503	5.75	0	0	0.98	4.91	-3.52	0	0.25	-0.02	-1.74	-2.38	14.69	24.35	0.85	0.77	-1.01	108.17	100	5.3	4.71	2	2	2	0	0	1	0	0	1	0	0	0	0	0	0	1697	1488	81	3.93	-1.72	0.9	0.89
hSQ001220	NM_002211	ITGB1	3688	5.66	0	0	1.45	5.18	-2.53	2.12	5.94	-1.62	-3.11	-3.5	9.63	16.53	0.9	0.79	-2.81	23.13	32.81	7.6	5.04	4	2	2	0	0	2	0	0	1	0	0	0	0	0	0	1177	2397	126	3.73	-1.49	0.87	0.66
hSQ012769	NM_001002257	LYCAT	253558	5.6	0	0	1.21	5.91	-4.06	0	1.06	1.81	-0.14	-1.97	14.69	29.71	0.96	0.89	-0.87	108.64	100	7.77	6.72	3	2	1	2	1	0	1	0	0	0	0	0	0	0	0	3605	1131	117	4.7	-1.95	0.93	0.87
hSQ037939	NM_001008393	LOC201725	201725	5.59	0	0	0.09	4.34	-3.06	1.97	0.67	1.71	0	-2.31	14.69	25.2	0.84	0.71	-0.65	108.64	100	3.42	3.11	1	1	1	1	1	1	0	0	0	0	0	0	0	0	0	2936	342	166	4.26	-1.71	0.84	0.91
hSQ016300	NM_032547	SCOC	60592	5.59	0	0	-1.03	2.88	0.13	90.93	100	1.6	1.66	-1.3	14.69	40.95	0.92	0.9	0.32	108.17	100	3.41	3.66	0	1	0	0	0	0	0	0	0	0	0	0	0	0	0	1446	369	143	3.91	0.06	0.97	1.07
hSQ022414	NM_152261	C12orf23	90488	5.52	0	0.01	-0.42	3.96	-4.18	0	1.25	0.64	-1.23	-3.36	9.63	17.06	0.93	0.83	-0.43	108.64	100	4.15	3.86	1	2	0	1	0	1	1	1	0	0	0	0	0	0	0	2590	351	213	4.38	-1.87	0.89	0.93
hSQ004527	NM_152621	SGMS2	166929	5.51	0	0.01	-0.36	3.65	-4.73	0	1.85	1.19	-1.54	-2.44	14.69	23.68	0.95	0.83	-1.54	44.12	81.81	5.47	4.4	0	0	0	0	0	1	1	0	0	0	0	0	0	0	0	400	1098	629	4.02	-2.72	0.87	0.8
hSQ035455	NM_016361	ACP6	51205	5.43	0	0.01	1.03	5.6	-3.19	1.6	0.32	0.77	-0.54	-4.15	9.63	15.13	0.88	0.76	-0.55	108.64	100	4.65	4.27	1	1	1	0	0	1	0	0	0	0	0	0	0	0	0	57	1287	464	4.57	-1.31	0.86	0.92
hSQ034070	NM_147156	SGMS1	259230	5.43	0	0.01	-2.05	1.99	-2.73	2.12	3	-1.41	-2.57	-0.53	21.69	54.25	0.83	0.79	-0.68	108.64	100	4.39	3.96	1	1	1	0	0	0	0	0	0	0	0	0	0	0	0	1556	1242	954	4.03	-1.17	0.96	0.9
hSQ027209	NM_004781	VAMP3	9341	5.43	0	0.01	-0.19	3.25	-7.19	0	1.98	1.15	-2.88	-9.61	0	15.82	0.92	0.5	-1.55	44.12	80.99	3.55	2.59	5	3	3	1	1	0	0	0	0	0	0	0	0	0	0	1786	303	115	3.44	-4.03	0.54	0.73
hSQ029892	NM_001085458	CTNND1	1500	5.26	0	0.02	-0.81	3.48	-2.76	1.97	2.64	-2.46	-3.99	-0.99	14.69	46.61	0.87	0.83	-3.21	16.31	31.42	8.05	6.14	4	2	2	0	0	3	1	0	1	0	1	0	0	0	0	2872	2907	571	4.29	-1.53	0.95	0.76
hSQ031353	NM_001621	AHR	196	5.16	0	0.03	-1.68	2.31	-1.39	15.82	64.46	-3.63	-4.53	0.27	29.81	61.03	0.8	0.83	-1.97	34.95	58.3	7.3	6.31	1	2	1	1	1	4	1	1	1	0	0	0	0	0	0	2683	2547	582	3.99	-0.91	1.04	0.87
hSQ043586	NM_001025593	ARFIP1	27236	5.14	0	0.03	0.32	4	-3.22	1.6	0.26	1.11	-0.44	-2.05	14.69	28.54	0.91	0.83	-3.36	16.31	32.1	8.25	6.52	2	2	1	0	0	0	0	0	0	0	0	0	0	0	0	1690	1026	276	3.69	-1.55	0.91	0.79
hSQ004229	NM_015917	GSTK1	373156	5.13	0	0.03	0.11	4.87	-1.17	30.1	81.27	0.48	-0.31	-1.65	14.69	34.73	0.85	0.76	-0.57	108.64	100	4.53	4.07	1	1	1	0	0	0	0	0	0	0	NA	NA	NA	NA	NA	272	681	NA	4.76	-0.8	0.89	0.9
hSQ008487	NM_014305	TGDS	23483	5.12	0	0.03	-1.78	1.83	-1.53	11.29	53.51	1.44	0.63	-3.08	9.63	18.45	0.89	0.84	-0.53	108.64	100	4.87	4.55	1	1	0	1	0	2	2	2	0	0	0	0	0	0	0	727	1053	121	3.61	-0.81	0.95	0.93
hSQ002516	NM_024584	CCDC121	79635	5.02	0	0.04	1.04	4.7	-1.01	43.3	93.09	1.71	1.26	0.81	29.5	59.1	0.5	0.61	-0.82	108.64	100	5.79	5.27	1	1	1	0	0	0	1	0	0	0	0	0	0	0	0	1324	837	181	3.66	-0.45	1.21	0.91
hSQ021298	NM_003432	ZNF131	7690	5.01	0	0.05	-1.37	3.18	-0.96	43.3	96.12	-0.48	-1.02	1.21	26.68	54.55	0.72	0.77	-0.33	108.64	100	4.66	4.45	0	0	0	0	0	1	0	0	0	0	NA	NA	NA	NA	NA	586	1770	NA	4.55	-0.54	1.07	0.95
hSQ014452	NM_130468	CHST14	113189	4.98	0	0.05	1.27	5.3	-4.41	0	1.55	0.31	-1.6	-3.71	9.63	15.92	0.86	0.74	-1.31	59.85	94.36	6.16	5.51	1	2	1	0	0	0	0	0	0	0	0	0	0	0	0	810	1131	200	4.03	-1.91	0.87	0.89
hSQ008153	NM_031942	CDCA7	83879	4.96	0	0.05	-0.54	3.27	-3.28	1.6	0.2	1.73	0.32	-1.66	14.69	34.58	0.87	0.75	-3.39	16.31	32.36	6.74	4.88	2	1	1	0	0	1	0	0	0	0	0	0	0	0	0	1326	1353	131	3.81	-1.42	0.86	0.72
hSQ005736	NM_144578	MAPK1IP1L	93487	4.94	0	0.05	0.89	5.56	-1.23	25.69	76.9	1.34	0.61	-0.84	19.17	49.25	0.92	0.87	-0.32	108.64	100	6.81	6.33	2	1	0	1	0	2	3	2	0	0	0	0	0	0	0	5567	738	164	4.67	-0.73	0.94	0.93
hSQ033286	NM_001099678	LRRC58	116064	4.91	0	0.05	-3.24	0.93	-2.57	2.12	5.25	1.57	-0.38	-1.38	14.69	39.45	0.97	0.91	-0.05	108.64	100	4.18	4.12	3	4	2	2	2	1	1	0	0	0	0	0	0	0	0	6471	1116	96	4.17	-1.95	0.94	0.99
hSQ001537	NM_172037	RDH10	157506	4.74	0	0.08	0.41	3.71	-4.85	0	1.93	3.04	0.75	-4.21	9.63	15.06	0.96	0.85	-1.1	81.59	100	6.12	5.25	1	1	1	0	0	0	1	0	0	0	0	0	0	0	0	1520	1026	188	3.3	-2.28	0.89	0.86
hSQ031496	NM_002508	NID1	4811	4.73	0	0.08	-0.05	3.1	-3.1	1.6	0.53	-0.26	-1.97	-0.96	14.69	47.18	0.9	0.87	-2.2	34.95	48.07	9.33	7.08	2	2	2	2	2	0	2	0	0	0	0	0	0	0	0	2026	3744	102	3.15	-1.71	0.96	0.76
hSQ023829	NM_016946	F11R	50848	4.72	0	0.08	-1.03	2.21	-2.62	2.12	4.51	-0.71	-2.07	-2.57	14.69	22.39	0.9	0.78	-2.3	34.95	44.32	7.32	5.69	3	3	0	2	0	1	4	1	0	0	0	0	0	0	0	2677	900	70	3.24	-1.36	0.87	0.78
hSQ033367	NM_014445	SERP1	27230	4.71	0	0.08	0.09	3.57	-6.5	0	2.06	0.25	-2.15	-5.72	8.9	13.53	0.92	0.72	-0.96	108.63	100	4.2	3.67	3	2	2	1	1	0	0	0	0	0	0	0	0	0	0	2464	201	506	3.48	-2.4	0.78	0.87
hSQ039657	NM_007073	BVES	11149	4.7	0	0.08	0.69	4.18	-1.3	21.42	71.63	0.47	-0.27	-0.75	19.17	50.76	0.82	0.79	0.11	108.17	100	4.54	4.58	3	0	0	0	0	4	4	3	0	0	0	0	0	0	0	4263	1083	87	3.49	-0.74	0.95	1.01
hSQ020692	NM_005385	NKTR	4820	4.69	0	0.08	-1.21	2.68	-0.24	92.38	100	0.22	0.08	-1.48	14.69	37.68	0.91	0.87	-0.15	108.64	100	4.96	4.87	0	1	0	0	0	0	2	0	0	0	0	0	0	0	0	2765	4389	147	3.89	-0.14	0.96	0.98
hSQ037173	NM_020376	PNPLA2	57104	4.69	0	0.08	1.12	4.57	-2.93	1.97	1.28	0.2	-1.24	-1.5	14.69	37.27	0.91	0.84	-0.67	108.64	100	6.12	5.69	1	1	1	1	1	0	0	0	0	0	0	0	0	0	0	354	1515	202	3.46	-1.44	0.93	0.93
hSQ027685	NM_005665	EVI5	7813	4.69	0	0.08	1.93	5.89	-3.46	0	0.2	0.13	-1.7	-1.99	14.69	29.46	0.92	0.84	-1.66	37.98	75.07	5.38	4.55	4	2	2	0	0	1	1	0	0	0	NA	NA	NA	NA	NA	4959	2433	NA	3.96	-1.83	0.91	0.84
hSQ026784	NM_003502	AXIN1	8312	4.64	0	0.09	1.43	4.64	-2.08	4.63	19.74	0.83	0.01	-2.6	14.69	22.06	0.91	0.84	-0.28	108.64	100	5.49	5.25	1	1	1	0	0	0	3	0	0	0	0	0	0	0	0	682	2589	177	3.2	-0.82	0.93	0.96
hSQ029225	NM_001075098	MOCS1	4337	4.64	0	0.09	-1.39	2.61	-2.16	4.63	16.69	1.12	0.12	-0.65	21.69	52.34	0.88	0.84	-0.69	108.64	100	5	4.46	2	1	1	1	1	0	1	0	0	0	0	0	0	0	0	1804	1158	62	4	-1	0.96	0.89
hSQ019511	NM_057175	NARG1	80155	4.62	0	0.09	-0.7	2.65	-4.53	0	1.69	1.43	-0.31	-0.63	21.69	52.65	0.89	0.87	-0.94	108.64	100	8.19	7.23	2	1	1	1	1	1	0	0	0	0	0	0	0	0	0	2697	2601	256	3.35	-1.74	0.97	0.88
hSQ002474	NM_194356	STX2	2054	4.59	0	0.09	2.54	5.72	-4.05	0	1.05	0.16	-1.36	0.18	29.81	60.83	0.81	0.83	-0.43	108.64	100	3.2	3.02	2	1	1	0	0	0	0	0	0	0	0	0	0	0	0	2419	867	167	3.18	-1.52	1.02	0.94
hSQ025934	NM_001085354	MORC4	79710	4.59	0	0.09	-1.02	2.29	-1.17	30.1	81.24	2.19	1.69	-0.92	14.69	47.81	0.91	0.88	-1.13	76.95	100	7.2	6.41	2	0	0	1	0	1	1	1	1	1	0	0	0	0	0	818	2703	243	3.32	-0.5	0.96	0.89
hSQ009668	NA	OR7E31P	375601	4.58	0	0.09	-0.5	3.32	-0.83	65.69	100	0.49	0.08	5.63	4.26	3.95	0.35	0.67	-0.01	108.64	100	2.81	2.8	NA	NA	NA	NA	NA	NA	NA	NA	NA	NA	NA	NA	NA	NA	NA	NA	NA	NA	3.82	-0.41	1.9	1
hSQ031698	NM_020642	C11orf17	56672	4.53	0	0.1	0.41	3.56	-0.42	92.38	100	1.03	0.85	-1.16	14.69	43.4	0.88	0.83	-0.27	108.64	100	4.58	4.43	1	1	1	0	0	0	0	0	0	0	0	0	0	0	0	597	633	76	3.15	-0.19	0.94	0.97
hSQ007789	NM_005768	MBOAT5	10162	4.53	0	0.1	0.81	3.97	-0.35	92.38	100	0.31	0.13	-1.22	14.69	42.33	0.9	0.87	-0.25	108.64	100	5.16	5.01	1	1	0	1	0	2	0	0	1	0	0	0	0	0	0	718	1464	114	3.15	-0.18	0.97	0.97
hSQ027747	NM_024539	RNF128	79589	4.53	0	0.1	-0.35	2.54	-2.93	1.97	1.25	0.48	-1.14	-2.91	14.69	19.56	0.94	0.89	-0.84	108.64	100	7.24	6.35	1	1	1	1	1	0	2	0	0	0	0	0	0	0	0	1301	1209	165	2.89	-1.62	0.94	0.88
hSQ034020	NM_001010924	C10orf38	221061	4.48	0	0.1	0.13	3.78	-2.76	1.97	2.62	0.67	-0.61	0.53	29.81	60.76	0.7	0.71	-1.15	76.95	100	4.74	4.08	2	1	1	0	0	1	1	0	0	0	NA	NA	NA	NA	NA	1267	2673	NA	3.65	-1.29	1.02	0.86
hSQ016805	NM_006754	SYPL1	6856	4.46	0	0.1	0.79	4.63	-4.37	0	1.5	-0.06	-2.74	-5.61	8.9	13.63	0.94	0.81	-2.16	34.95	49.58	7.86	5.46	3	1	1	1	0	0	0	0	0	0	0	0	0	0	0	1297	780	82	3.84	-2.69	0.86	0.69
hSQ026829	NA	MGC57346	401884	4.44	0	0.1	0.98	4.57	-1.67	9.09	43.54	1.85	1.16	-4.58	9.63	14.68	0.8	0.69	-0.91	108.64	100	3.75	3.23	NA	NA	NA	NA	NA	NA	NA	NA	NA	NA	NA	NA	NA	NA	NA	NA	NA	NA	3.59	-0.69	0.87	0.86
hSQ018289	NM_182505	C9orf85	138241	4.44	0	0.1	-1.89	1.04	-1.03	35.24	91.43	1.41	0.76	0.27	29.81	61.02	0.61	0.64	0.44	108.17	100	4.02	4.27	1	1	1	0	0	0	1	0	0	0	0	0	0	0	0	611	474	228	2.93	-0.65	1.05	1.06
hSQ033387	NM_001029998	SLC10A7	84068	4.43	0	0.11	2.53	5.65	-4.07	0	1.07	0.97	-1.25	0.22	29.81	60.94	0.67	0.69	-1.28	59.85	95.38	5.24	4.05	1	1	1	1	1	1	1	1	0	0	0	0	0	0	0	1465	1023	216	3.12	-2.22	1.04	0.77
hSQ040757	NA	C11orf67	28971	4.43	0	0.11	-1.36	2.31	-5	0	2	1.69	-0.47	-3.72	9.63	15.89	0.97	0.87	-0.79	108.64	100	4.72	4.33	NA	NA	NA	NA	NA	NA	NA	NA	NA	NA	NA	NA	NA	NA	NA	NA	NA	NA	3.67	-2.16	0.89	0.92
hSQ013696	NM_014415	ZBTB11	27107	4.43	0	0.11	0.83	4.65	-1.22	25.69	77.28	0.74	0.08	0.08	29.81	60.44	0.89	0.89	-0.31	108.64	100	6.2	5.99	1	1	1	0	0	1	2	1	0	0	0	0	0	0	0	1719	3162	159	3.82	-0.66	1.01	0.97
hSQ008543	NM_003870	IQGAP1	8826	4.41	0	0.11	0.22	3.72	-2.22	4.63	14.24	-0.72	-1.96	0.8	29.5	59.13	0.76	0.8	-1.6	37.98	78.58	5.9	4.45	4	2	2	1	1	3	1	0	1	0	0	0	0	0	0	2135	4974	101	3.5	-1.24	1.06	0.75
hSQ011324	NA	STX10	8677	4.41	0	0.11	1.64	5.53	-3.66	0	0.4	1.12	-0.94	-3.33	9.63	17.19	0.84	0.69	-0.27	108.64	100	3.46	3.32	NA	NA	NA	NA	NA	NA	NA	NA	NA	NA	NA	NA	NA	NA	NA	NA	NA	NA	3.88	-2.06	0.82	0.96
hSQ035006	NM_022091	ASCC3	10973	4.4	0	0.11	1.65	5.07	-1.77	7.95	36.42	-0.46	-1.63	-1.62	14.69	35.23	0.92	0.87	-1.09	81.59	100	8.27	7.42	1	0	0	1	0	0	0	0	0	0	0	0	0	0	0	2805	336	329	3.42	-1.17	0.95	0.9
hSQ043190	NM_144599	NIPA1	123606	4.37	0	0.11	0.52	3.57	-1.87	5.84	30.33	0.28	-0.53	1.32	25.16	52.92	0.62	0.79	0.2	108.17	100	3.44	3.54	4	3	1	0	0	1	3	1	0	0	NA	NA	NA	NA	NA	5548	990	NA	3.05	-0.82	1.27	1.03
hSQ041716	NM_014319	LEMD3	23592	4.33	0	0.11	1.11	4.43	-1.24	25.69	76.34	0.79	0.13	0.08	29.81	60.43	0.87	0.87	-0.76	108.64	100	6.59	6.03	1	3	1	1	1	0	0	0	0	0	NA	NA	NA	NA	NA	2002	2736	NA	3.32	-0.66	1.01	0.92
hSQ038948	NM_001010984	C1orf124	83932	4.31	0	0.11	-3.07	0.68	-0.75	74.83	100	3.64	3.26	-0.79	19.17	50.16	0.89	0.87	-0.59	108.64	100	6.68	6.35	3	1	1	1	0	0	0	0	0	0	0	0	0	0	0	2636	753	448	3.75	-0.38	0.98	0.95
hSQ014397	NM_024584	CCDC121	79635	4.3	0	0.11	-1.95	2.18	-0.76	74.83	100	1.02	0.62	1.22	26.28	54.4	0.46	0.6	-1.05	85.33	100	5.72	5.05	1	1	1	0	0	0	1	0	0	0	0	0	0	0	0	1324	837	181	4.13	-0.4	1.3	0.88
hSQ019308	NA	BC062733	389537	4.3	0	0.11	-0.01	3.11	-0.12	92.38	100	2.41	2.34	0.68	29.81	60.02	0.68	0.81	0.09	108.17	100	2.67	2.72	NA	NA	NA	NA	NA	NA	NA	NA	NA	NA	NA	NA	NA	NA	NA	NA	NA	NA	3.13	-0.07	1.2	1.02
hSQ008149	NM_001008393	LOC201725	201725	4.28	0	0.11	0.25	3.57	-2.48	2.6	7.05	2.01	0.62	-2.61	14.69	22	0.87	0.77	-1.32	59.85	93.76	3.83	3.15	1	1	1	1	1	1	0	0	0	0	0	0	0	0	0	2936	342	166	3.32	-1.39	0.88	0.82
hSQ014881	NM_004937	CTNS	1497	4.27	0	0.11	0.36	4.13	-1.64	9.09	45.23	2.39	1.38	-3.16	9.63	17.99	0.92	0.84	-1.11	81.59	100	5.99	5.24	2	2	1	1	1	0	1	0	0	0	0	0	0	0	0	2734	1104	593	3.77	-1.01	0.91	0.88
hSQ023181	NM_033116	NEK9	91754	4.25	0	0.11	0.5	3.28	-1.66	9.09	44.19	0.4	-0.49	-1.82	14.69	31.94	0.93	0.85	-2.59	28.06	36.29	6.14	4.5	1	0	0	0	0	3	2	1	0	0	NA	NA	NA	NA	NA	292	2940	NA	2.78	-0.89	0.92	0.73
hSQ035112	NM_004816	C9orf61	9413	4.25	0	0.11	1.7	4.52	-0.77	74.83	100	-0.58	-1	0.15	29.81	60.74	0.81	0.82	0	108.64	100	5.81	5.8	1	0	0	0	0	2	2	1	0	0	0	0	0	0	0	648	1353	420	2.82	-0.43	1.01	1
hSQ017085	NM_022450	RHBDF1	64285	4.23	0	0.11	1.1	4.29	-1.68	9.09	42.62	-1.67	-2.3	-1.1	14.69	44.51	0.8	0.73	-1.14	76.95	100	4.08	3.34	1	1	1	0	0	3	3	2	0	0	1	0	0	0	0	280	2568	105	3.19	-0.63	0.91	0.82
hSQ018707	NM_002211	ITGB1	3688	4.21	0	0.11	-1.85	1.53	-1.98	5.14	24.65	-1.87	-3.23	-3.11	9.63	18.23	0.95	0.82	-3.5	16.31	33.27	7.31	4.98	4	2	2	0	0	2	0	0	1	0	0	0	0	0	0	1177	2397	126	3.38	-1.36	0.86	0.68
hSQ015240	NM_139014	MAPK14	1432	4.2	0	0.11	-0.57	3.25	-2.39	2.6	9.15	0.03	-1.35	-4.08	9.63	15.22	0.94	0.82	-2.37	32.47	41.84	6.26	5.01	1	2	1	1	1	0	0	0	0	0	0	0	0	0	0	2391	924	362	3.82	-1.38	0.88	0.8
hSQ006270	NM_002826	QSOX1	5768	4.2	0	0.11	-0.04	3.13	-1.15	30.1	83.04	-2.6	-3.25	-1.9	14.69	30.69	0.96	0.89	-1.34	56.69	92.69	7.07	5.86	3	2	2	1	1	0	0	0	0	0	0	0	0	0	0	995	2244	75	3.17	-0.65	0.93	0.83
hSQ042109	NM_014305	TGDS	23483	4.18	0	0.1	-2.78	0.01	-1.51	11.29	55.26	1.59	0.68	-2.94	14.69	19.32	0.9	0.82	0.42	108.17	100	4.77	5.14	1	1	0	1	0	2	2	2	0	0	0	0	0	0	0	727	1053	121	2.79	-0.91	0.91	1.08
hSQ005510	NM_018214	LRRC1	55227	4.16	0	0.1	2.23	5.32	-5.25	0	2.08	0.53	-1.73	-3.77	9.63	15.77	0.87	0.74	-1.85	34.95	64.37	5.87	4.55	2	3	2	2	2	2	0	0	0	0	0	0	0	0	0	1328	1575	277	3.09	-2.26	0.86	0.78
hSQ043542	NM_001098817	C18orf37	125476	4.16	0	0.1	-0.52	2.56	-4.39	0	1.53	3.71	1.91	-4.28	9.63	14.98	0.97	0.86	-1.59	37.98	78.81	5.97	4.87	1	1	1	0	0	2	2	1	0	0	0	0	0	0	0	284	687	117	3.08	-1.8	0.89	0.82
hSQ021824	NM_000696	ALDH9A1	223	4.15	0	0.1	2.39	5.1	-1.9	5.14	29.08	1.6	0.59	-2.34	14.69	24.77	0.94	0.9	-1.44	51.15	87.64	10.73	9.72	1	1	1	0	0	0	1	0	0	0	0	0	0	0	0	838	1557	105	2.71	-1.01	0.95	0.91
hSQ043964	NM_021190	PTBP2	58155	4.14	0	0.1	0.1	3.9	0.59	84.11	88.41	1.51	1.77	1.1	27.27	56.04	0.67	0.79	2.32	71.06	100	6.17	7.23	2	2	2	1	1	0	0	0	0	0	NA	NA	NA	NA	NA	1385	1596	NA	3.8	0.26	1.18	1.17
hSQ012120	NM_018706	DHTKD1	55526	4.13	0	0.1	1.59	4.43	-1.36	15.82	66.47	-0.08	-0.69	-1.98	14.69	29.59	0.92	0.88	-2.39	32.47	41.43	6.52	5.45	1	1	1	1	1	1	1	0	0	0	0	0	0	0	0	2337	2760	99	2.84	-0.61	0.95	0.84
hSQ028365	NM_015044	GGA2	23062	4.12	0	0.1	-1.04	2.23	-1.32	21.42	69.91	0.16	-0.59	-3.21	9.63	17.71	0.94	0.85	-3.5	16.31	33.25	6.31	4.41	3	3	2	1	1	1	0	0	1	0	0	0	0	0	0	3267	1842	76	3.27	-0.75	0.9	0.7
hSQ012529	NM_153367	C10orf56	219654	4.12	0	0.1	0.61	4.14	-2.41	2.6	8.68	-1.78	-3.31	-1.02	14.69	46.01	0.89	0.85	-0.54	108.64	100	3.51	3.31	4	3	1	2	1	1	0	0	0	0	0	0	0	0	0	4018	726	184	3.54	-1.54	0.95	0.94
hSQ013364	NM_004309	ARHGDIA	396	4.1	0	0.09	0.72	4.58	-0.56	92.38	100	1.32	0.92	-0.91	14.69	48.07	0.91	0.87	0.24	108.17	100	5.85	5.98	2	3	0	1	0	0	0	0	0	0	0	0	0	0	0	1154	615	92	3.86	-0.4	0.96	1.02
hSQ042312	NM_023943	TMEM108	66000	4.08	0	0.09	-0.21	2.84	-0.46	92.38	100	1.36	1.1	3.08	8.94	22.05	0.38	0.65	-0.94	108.64	100	4.33	3.82	0	0	0	0	0	2	1	1	0	0	0	0	0	0	0	225	1728	192	3.05	-0.26	1.71	0.88
hSQ024161	NM_024098	CCDC86	79080	4.08	0	0.09	-0.6	2.3	-2.42	2.6	8.31	1.85	0.76	-1.53	14.69	36.77	0.95	0.9	-1.68	37.98	73.61	7.4	6.37	1	2	1	0	0	0	0	0	0	0	0	0	0	0	0	763	1083	169	2.9	-1.08	0.96	0.86
hSQ025646	NM_152695	ZNF449	203523	4.08	0	0.09	2.31	5.33	-1.2	25.69	79.51	0.55	-0.05	0.47	29.81	60.94	0.66	0.69	-0.27	108.64	100	4.09	3.87	2	2	1	2	1	0	0	0	0	0	0	0	0	0	0	2337	1557	140	3.02	-0.6	1.05	0.94
hSQ029482	NM_015917	GSTK1	373156	4.06	0	0.09	-1.09	2.27	-1.97	5.14	24.96	1.19	0.28	-1.89	14.69	30.84	0.87	0.77	-0.81	108.64	100	4.83	4.31	1	1	1	0	0	0	0	0	0	0	NA	NA	NA	NA	NA	272	681	NA	3.36	-0.91	0.89	0.89
hSQ031490	NA	S1PR3::C9orf47::NM_005226	1903::286223	4.06	0	0.09	1.53	4.85	-1.7	7.95	41.6	-1.79	-2.55	-2.07	14.69	28.34	0.88	0.83	-1.04	85.33	100	5.28	4.82	NA	NA	NA	NA	NA	NA	NA	NA	NA	NA	NA	NA	NA	NA	NA	NA	NA	NA	3.32	-0.76	0.94	0.91
hSQ030948	NM_020462	ERGIC1	57222	4.04	0	0.08	0.97	3.64	-0.46	92.38	100	-0.64	-0.91	1.41	25.16	51.56	0.66	0.82	-0.03	108.64	100	3.31	3.29	1	1	0	1	0	0	0	0	0	0	0	0	0	0	0	3253	480	215	2.67	-0.27	1.24	0.99
hSQ032244	NA	OR7E31P::BC062733	375601::389537	4.04	0	0.08	-0.02	2.97	-0.27	92.38	100	2.25	2.07	0.75	29.81	59.56	0.67	0.81	0.17	108.17	100	2.68	2.76	NA	NA	NA	NA	NA	NA	NA	NA	NA	NA	NA	NA	NA	NA	NA	NA	NA	NA	2.99	-0.17	1.2	1.03
hSQ012348	NM_014170	GTPBP8	29083	4.04	0	0.08	-1.52	2.09	-2.88	1.97	1.58	2.59	1.06	-2.64	14.69	21.71	0.95	0.85	-2.16	34.95	49.8	6.66	5.42	1	2	1	0	0	0	0	0	0	0	NA	NA	NA	NA	NA	454	855	NA	3.61	-1.54	0.9	0.81
hSQ045255	NM_006809	TOMM34	10953	4.03	0	0.08	1.7	4.51	-3.39	1.6	0.17	2.12	0.52	-5.39	9.63	13.87	0.97	0.88	-1.66	37.98	75.01	6.02	5.3	3	1	1	0	0	2	2	1	0	0	0	0	0	0	0	979	930	140	2.81	-1.6	0.9	0.88
hSQ041717	NM_024989	PGAP1	80055	4.03	0	0.08	0.35	3.54	0.56	84.11	89.67	1.87	2.11	2.11	21.69	39.05	0.41	0.66	0.39	108.17	100	4.79	5.08	5	4	1	1	0	2	3	1	1	1	0	0	0	0	0	8229	2769	114	3.19	0.24	1.61	1.06
hSQ028478	NM_152707	SLC25A16	8034	4.02	0	0.08	-0.54	2.7	-0.95	52.46	97.28	0.07	-0.44	-0.15	21.69	58.77	0.87	0.87	0.05	108.17	100	2.73	2.76	0	0	0	0	0	1	1	1	1	1	0	0	0	0	0	1091	999	452	3.23	-0.51	1	1.01
hSQ018897	NM_001048201	UHRF1	29128	4.01	0	0.07	0.38	3.38	-1.9	5.14	28.85	0.5	-0.61	-1.74	14.69	33.26	0.97	0.92	-1.45	48.64	87.04	10.22	8.42	1	1	1	0	0	0	0	0	0	0	0	0	0	0	0	1350	2381	168	3	-1.11	0.95	0.82
hSQ018983	NM_001083588	E2F5	1875	4	0	0.07	1.65	4.67	-4.63	0	1.78	2.26	0.03	-3.43	9.63	16.79	0.95	0.83	-0.79	108.64	100	4.78	4.31	1	1	1	0	0	0	0	0	0	0	NA	NA	NA	NA	NA	657	1038	NA	3.02	-2.24	0.88	0.9
hSQ000992	NM_001966	EHHADH	1962	4	0	0.07	1.98	4.83	-1.7	7.95	41.53	-0.85	-1.68	0.62	29.81	60.35	0.85	0.86	-1.25	66.03	96.88	6.38	5.74	2	1	1	0	0	0	0	0	0	0	NA	NA	NA	NA	NA	1600	2172	NA	2.85	-0.84	1.01	0.9
hSQ028780	NM_004364	CEBPA	1050	4	0	0.07	-0.49	3.57	-3.21	1.6	0.29	0.24	-1.11	-5	9.63	14.29	0.88	0.63	-0.56	108.64	100	4.94	4.53	4	4	3	0	0	0	0	0	0	0	NA	NA	NA	NA	NA	1308	1077	NA	4.06	-1.36	0.72	0.92
hSQ000085	NM_024336	IRX3	79191	3.99	0	0.07	0.4	3.04	-0.76	74.83	100	0.19	-0.27	2.59	14.69	30.1	0.68	0.8	-0.79	108.64	100	5.67	5.31	1	0	0	0	0	1	1	1	0	0	0	0	0	0	0	386	1506	416	2.64	-0.46	1.18	0.94
hSQ035067	NM_001914	CYB5A	1528	3.99	0	0.07	-0.18	3.02	-2.45	2.6	7.69	1.53	-0.08	-0.19	21.69	58.42	0.93	0.91	-1.12	76.95	100	4	3.46	1	1	1	0	0	0	0	0	0	0	0	0	0	0	0	423	297	111	3.2	-1.61	0.98	0.86
hSQ022148	NA	DLEU1	10301	3.99	0	0.07	0.76	4.2	-0.54	92.38	100	1.87	1.62	-0.52	21.69	54.3	0.82	0.8	-0.2	108.64	100	4.26	4.07	NA	NA	NA	NA	NA	NA	NA	NA	NA	NA	NA	NA	NA	NA	NA	NA	NA	NA	3.44	-0.25	0.98	0.95
hSQ015799	NM_182760	SUMF1	285362	3.99	0	0.07	2.59	5.67	-4	0	0.95	-0.69	-2.62	-4.54	9.63	14.72	0.94	0.79	-0.82	108.64	100	4.42	4.02	1	1	1	0	0	2	0	0	0	0	NA	NA	NA	NA	NA	998	1125	NA	3.08	-1.93	0.84	0.91
hSQ011124	NM_001665	RHOG	391	3.98	0	0.07	-0.19	4.51	-4.49	0	1.64	0.62	-1.57	-4.51	9.63	14.75	0.89	0.55	-0.58	108.64	100	4.73	4.24	5	5	4	1	1	0	1	0	0	0	0	0	0	0	0	585	576	158	4.7	-2.19	0.61	0.9
hSQ022156	NA	HEATR1::XM_496444	55127::440735	3.98	0	0.07	0.33	3.12	0.28	84.11	100	3.75	3.9	0.55	29.81	60.69	0.83	0.85	-0.38	108.64	100	5.33	5.07	NA	NA	NA	NA	NA	NA	NA	NA	NA	NA	NA	NA	NA	NA	NA	NA	NA	NA	2.79	0.15	1.02	0.95
hSQ008508	NM_000376	VDR	7421	3.97	0	0.06	1.42	3.93	-2.52	2.12	6.27	0.95	0.06	-1.43	14.69	38.59	0.96	0.92	-0.65	108.64	100	7.04	6.65	3	5	2	1	1	0	0	0	0	0	0	0	0	0	0	3207	1284	160	2.51	-0.89	0.96	0.94
hSQ024812	NM_032121	MAGT1	84061	3.97	0	0.06	0.19	3.83	-4.34	0	1.47	1.88	-0.98	-5.47	9.63	13.79	0.98	0.88	-1.09	81.59	100	8.48	6.54	3	2	2	3	2	0	0	0	0	0	NA	NA	NA	NA	NA	2855	1008	NA	3.64	-2.86	0.9	0.77
hSQ034510	NM_052936	ATG4A	115201	3.97	0	0.06	-0.32	2.64	-2.83	1.97	1.97	1.92	0.66	-2.43	14.69	23.78	0.91	0.86	-0.16	108.64	100	4.53	4.41	0	1	0	0	0	0	0	0	0	0	0	0	0	0	0	953	1197	123	2.96	-1.26	0.95	0.97
hSQ030786	NM_004862	LITAF	9516	3.96	0	0.06	0.99	3.67	-1.56	11.29	50.95	-0.68	-1.49	-1.12	14.69	44.28	0.82	0.71	-0.99	108.61	100	4.53	4.05	4	1	0	2	0	0	1	0	0	0	0	0	0	0	0	1637	486	233	2.67	-0.8	0.87	0.89
hSQ001978	NM_030805	LMAN2L	81562	3.95	0	0.06	-0.98	1.93	-1.65	9.09	44.83	0.45	-0.37	-3.14	9.63	18.08	0.93	0.86	-1.65	37.98	75.41	6.19	5.23	3	2	1	2	0	1	1	1	0	0	NA	NA	NA	NA	NA	1326	1047	NA	2.91	-0.82	0.93	0.85
hSQ004980	NM_004099	STOM	2040	3.95	0	0.06	0.25	3.03	-0.67	90.93	100	-0.89	-1.24	-2.68	14.69	21.36	0.95	0.89	-0.89	108.64	100	6.41	5.9	2	1	1	1	1	0	0	0	0	0	0	0	0	0	0	2126	867	80	2.77	-0.35	0.93	0.92
hSQ038197	NM_006479	RAD51AP1	10635	3.93	0	0.05	-0.96	2.49	-2.77	1.97	2.55	1.3	0.11	-3.06	9.63	18.57	0.93	0.84	-0.49	108.64	100	5.83	5.39	1	1	1	0	0	0	0	0	0	0	0	0	0	0	0	1055	1008	50	3.44	-1.19	0.9	0.92
hSQ035598	NM_001098817	C18orf37	125476	3.93	0	0.05	-0.57	2.41	-4.11	0	1.13	3.66	1.56	-3.7	9.63	15.94	0.95	0.85	-1.04	85.33	100	5.66	4.89	1	1	1	0	0	2	2	1	0	0	0	0	0	0	0	284	687	117	2.98	-2.1	0.89	0.86
hSQ003015	NM_006751	SSFA2	6744	3.9	0	0.03	0.24	3.47	-1.77	7.95	36.94	-1.62	-2.54	-0.21	21.69	58.23	0.82	0.81	-0.79	108.64	100	3.9	3.44	1	1	1	1	1	2	1	1	0	0	0	0	0	0	0	1078	3771	112	3.23	-0.93	0.98	0.88
hSQ018645	NM_006435	IFITM2	10581	3.88	0	0.03	0.07	3.08	0.35	84.11	98.41	-2.62	-2.39	-1.98	14.69	29.57	0.95	0.9	-0.04	108.64	100	4.58	4.56	0	0	0	0	0	0	2	0	0	0	0	0	0	0	0	245	399	86	3.01	0.23	0.95	0.99
hSQ000790	NM_000097	CPOX	1371	3.88	0	0.02	-0.05	2.4	-2.43	2.6	8.2	1.25	0.32	-1.88	14.69	31.03	0.95	0.91	-0.53	108.64	100	7.81	7.3	1	1	1	1	1	0	0	0	0	0	0	0	0	0	0	1235	1365	93	2.45	-0.93	0.96	0.93
hSQ005403	NM_012458	TIMM13	26517	3.85	0	0.01	0.48	3.24	-0.61	91.61	100	2.9	2.59	-1.9	14.69	30.7	0.98	0.93	0.72	108.17	100	3.92	4.28	1	2	1	0	0	0	0	0	0	0	0	0	0	0	0	1324	288	344	2.76	-0.31	0.94	1.09
hSQ008043	NM_016946	F11R	50848	3.85	0	0.01	0.45	3.57	-2.12	4.63	18.18	-0.68	-1.73	-3.31	9.63	17.26	0.89	0.78	-2.06	34.95	53.91	7.02	5.31	3	3	0	2	0	1	4	1	0	0	0	0	0	0	0	2677	900	70	3.12	-1.05	0.88	0.76
hSQ000817	NM_002742	PRKD1	5587	3.84	0	0.01	0.42	3.5	-2.93	1.97	1.26	0.08	-1.3	-1.65	14.69	34.84	0.86	0.83	-1.52	44.12	82.93	7.41	6.24	3	2	1	1	0	1	0	0	0	0	0	0	0	0	0	755	2739	181	3.08	-1.38	0.97	0.84
hSQ006562	NM_020360	PLSCR3	57048	3.84	0	0.01	0.28	3.58	-0.71	84.11	100	-1.06	-1.4	1.57	23.79	48.8	0.65	0.75	-0.18	108.64	100	4.33	4.2	2	1	1	1	1	1	1	1	0	0	0	0	0	0	0	649	888	209	3.3	-0.34	1.16	0.97
hSQ020618	NM_000112	SLC26A2	1836	3.84	0	0.01	-0.61	2.6	-2.13	4.63	17.87	-0.09	-1.25	-1.11	14.69	44.32	0.93	0.87	-2.08	34.95	52.99	6.46	5.04	5	2	1	1	0	3	3	2	1	1	0	0	0	0	0	5583	2220	268	3.21	-1.17	0.93	0.78
hSQ004264	NM_006111	ACAA2	10449	3.83	0	0	-0.7	2.51	-2.21	4.63	14.51	0.06	-1.17	-0.99	14.69	46.59	0.91	0.86	-1.1	81.59	100	6.13	5.4	2	0	0	2	0	1	0	0	0	0	NA	NA	NA	NA	NA	342	1194	NA	3.21	-1.23	0.95	0.88
hSQ038762	NM_173824	C3orf38	285237	3.82	0	0	0.16	3.12	-1.36	15.82	66.35	1.81	1.16	-1.29	14.69	41.07	0.84	0.78	0.31	108.17	100	5.32	5.49	0	0	0	0	0	0	0	0	0	0	0	0	0	0	0	280	984	100	2.96	-0.65	0.93	1.03
hSQ041035	NM_173515	CNKSR3	154043	3.81	0	0	1.92	4.82	-2.56	2.12	5.51	1.23	-0.19	-0.7	21.69	51.64	0.84	0.81	-0.55	108.64	100	5.95	5.47	1	1	1	0	0	0	0	0	0	0	0	1	0	0	0	1054	1668	505	2.89	-1.42	0.96	0.92
hSQ035304	NM_017784	OSBPL10	114884	3.8	0	0	-1.39	1.48	-2.36	2.6	10.03	-2.12	-3	-1.51	14.69	37.13	0.91	0.86	-0.77	108.64	100	6.33	5.66	1	1	1	0	0	2	2	0	0	0	0	0	0	0	0	1246	2295	381	2.87	-0.89	0.94	0.89
hSQ020453	NA	LOC144383	144383	3.8	0	0	0.15	2.73	0.48	84.11	93.22	-1.69	-1.42	-1.35	14.69	39.96	0.95	0.91	0.12	108.17	100	5.2	5.26	NA	NA	NA	NA	NA	NA	NA	NA	NA	NA	NA	NA	NA	NA	NA	NA	NA	NA	2.58	0.27	0.96	1.01
hSQ010592	NM_032997	ZWINT	11130	3.79	0	0	-0.64	2.08	-2.14	4.63	17.33	3.41	2.48	-2.63	14.69	21.82	0.96	0.85	-0.61	108.64	100	6.52	5.8	1	1	1	1	1	0	0	0	0	0	NA	NA	NA	NA	NA	980	834	NA	2.72	-0.92	0.89	0.89
hSQ042808	NM_014918	CHSY1	22856	3.79	0	0	0.48	3.29	-2.02	4.63	22.66	-0.11	-1.13	-1.94	14.69	30.2	0.9	0.83	-1.08	81.59	100	4.84	4.13	3	1	1	1	1	1	0	0	0	0	0	0	0	0	0	1660	2409	465	2.81	-1.01	0.91	0.85
hSQ002781	NM_032547	SCOC	60592	3.79	0	0	-2.32	0.45	-0.56	92.38	100	0.74	0.44	-0.33	21.69	56.91	0.9	0.88	0.15	108.17	100	2.92	3.01	0	1	0	0	0	0	0	0	0	0	0	0	0	0	0	1446	369	143	2.77	-0.3	0.98	1.03
hSQ011331	NM_012334	MYO10	4651	3.78	0	0	-0.43	2.63	-1.09	35.24	87.63	-3.86	-4.42	-2.84	14.69	20.06	0.96	0.9	-1.61	37.98	77.68	8.21	6.82	5	2	1	3	1	1	3	1	0	0	0	0	0	0	0	4785	6177	468	3.05	-0.57	0.94	0.83
hSQ017477	NM_032367	ZBED3	84327	3.77	0	0	0.26	3.34	-2.44	2.6	8.01	0.43	-0.93	-1.67	14.69	34.36	0.91	0.83	-0.43	108.64	100	3.96	3.72	1	2	0	0	0	0	0	0	0	0	0	0	0	0	0	467	705	247	3.08	-1.36	0.92	0.94
hSQ032961	NA	KATNA1	11104	3.76	0	0	0.07	3.13	-3.34	1.6	0.17	1.98	0.59	-2.69	14.69	21.3	0.87	0.82	-1.67	37.98	74.57	6.56	5.6	NA	NA	NA	NA	NA	NA	NA	NA	NA	NA	NA	NA	NA	NA	NA	NA	NA	NA	3.06	-1.39	0.94	0.85
hSQ003007	NM_005866	OPRS1	10280	3.75	0	0	0.1	2.25	-0.3	92.38	100	2.4	2.23	-1.23	14.69	42.21	0.96	0.92	0.69	108.17	100	5.01	5.3	2	0	0	1	0	1	1	1	0	0	0	0	0	0	0	909	672	74	2.14	-0.17	0.95	1.06
hSQ031913	NM_005730	CTDSP2	10106	3.75	0	0	0.97	3.97	-2.69	2.12	3.43	1.09	-0.04	-0.32	21.69	56.99	0.79	0.77	-0.77	108.64	100	3.58	3.26	5	5	1	1	0	0	2	0	0	0	0	0	0	0	0	3674	816	529	3	-1.13	0.98	0.91
hSQ044890	NM_016486	TMEM69	51249	3.74	0	0	0.66	3.44	-0.38	92.38	100	0.81	0.63	0.46	29.81	60.96	0.62	0.67	-0.64	108.64	100	5.25	4.76	0	0	0	0	0	1	0	0	0	0	1	2	1	0	0	531	744	196	2.78	-0.18	1.08	0.91
hSQ034521	NM_198449	EMB	133418	3.74	0	0	-2.57	0.33	-0.17	92.38	100	0.61	0.52	2.44	19.17	32.76	0.75	0.85	0.48	108.17	100	3.4	3.64	1	0	0	0	0	1	1	1	0	0	0	0	0	0	0	630	984	216	2.9	-0.09	1.13	1.07
hSQ021087	NA	C17orf69	147081	3.73	0	0	-0.14	2.5	-0.73	74.83	100	1.37	1.1	-0.84	19.17	49.16	0.8	0.71	-0.68	108.64	100	3.49	3.14	NA	NA	NA	NA	NA	NA	NA	NA	NA	NA	NA	NA	NA	NA	NA	NA	NA	NA	2.64	-0.27	0.89	0.9
hSQ023773	NM_020159	SMARCAD1	56916	3.73	0	0	-0.99	1.77	-1	43.3	93.6	-0.49	-1	1.49	23.79	50.29	0.77	0.83	-1.2	71.06	99.06	6.87	6.14	1	1	1	1	1	1	0	0	0	0	0	1	0	0	0	1758	3081	73	2.76	-0.52	1.08	0.89
hSQ044726	NM_000922	PDE3B	5140	3.72	0	0	1.1	4.26	-2.58	2.12	5.07	-0.47	-1.9	-3.53	9.63	16.44	0.94	0.87	-2.35	32.47	42.48	5.7	4.69	1	0	0	0	0	3	2	1	0	0	0	0	0	0	0	1144	3339	291	3.16	-1.43	0.93	0.82
hSQ034708	NM_031279	AGXT2L1	64850	3.71	0	0	1.29	3.78	-2.68	2.12	3.65	0.98	-0.26	0.13	29.81	60.63	0.76	0.76	-0.36	108.64	100	4.66	4.43	2	2	2	1	1	1	0	0	0	0	0	0	0	0	0	436	1500	155	2.49	-1.24	1.01	0.95
hSQ027616	NM_006640	2009-09-09	10801	3.7	0	0	0.69	3.34	-1.85	5.84	31.7	-0.52	-1.57	-1.53	14.69	36.87	0.95	0.9	-1.91	34.95	61.58	7.66	6.12	1	3	1	0	0	0	0	0	0	0	0	0	0	0	0	1936	1707	807	2.65	-1.05	0.94	0.8
hSQ013280	NM_004781	VAMP3	9341	3.7	0	0	0.77	3.56	-5.98	0	2.12	1.36	-1.84	-15.42	0	16.38	0.93	0.58	-3.16	16.31	31.31	4.97	3.47	5	3	3	1	1	0	0	0	0	0	0	0	0	0	0	1786	303	115	2.79	-3.2	0.62	0.7
hSQ003689	NM_015036	ENDOD1	23052	3.69	0	0	1.91	4.54	-2.72	2.12	3.15	-0.58	-1.85	-1.52	14.69	36.92	0.93	0.87	-0.49	108.64	100	5.58	5.28	2	2	1	0	0	1	0	0	0	0	0	0	0	0	0	3072	1503	75	2.63	-1.26	0.94	0.95
hSQ016059	NM_017588	WDR5	11091	3.68	0	0	0.97	3.52	-0.31	92.38	100	1.51	1.37	0.09	29.81	60.47	0.86	0.86	0.21	108.17	100	5.18	5.27	1	1	0	0	0	0	3	0	0	0	0	0	0	0	0	1978	1005	171	2.55	-0.13	1	1.02
hSQ015789	NM_021198	CTDSP1	58190	3.68	0	0	1.46	5.38	-4.04	0	1.03	-0.3	-2.57	-1.95	14.69	29.97	0.68	0.48	-1.07	81.59	100	3.24	2.65	8	5	4	1	0	0	0	0	0	0	0	0	0	0	0	1515	786	336	3.92	-2.27	0.71	0.82
hSQ017839	NM_020962	NOPE	57722	3.68	0	0	1.42	3.99	-1.47	13.85	58.05	-1.72	-2.5	-0.19	21.69	58.4	0.72	0.71	-0.76	108.64	100	3.1	2.66	3	2	0	1	0	0	1	0	0	0	0	0	0	0	0	2522	3753	210	2.57	-0.78	0.98	0.86
hSQ035098	NM_002668	PLP2	5355	3.67	0	0	-1.14	2.27	-0.17	92.38	100	-1.67	-1.77	-2.05	14.69	28.53	0.9	0.82	-0.19	108.64	100	4.67	4.57	1	2	1	0	0	0	2	0	0	0	0	0	0	0	0	392	459	75	3.41	-0.11	0.91	0.98
hSQ019864	NM_001006935	TCEAL4	79921	3.67	0	0	-0.05	2.55	0.23	90.93	100	2.54	2.68	-1.41	14.69	38.85	0.95	0.91	-0.15	108.64	100	8.14	8.01	0	0	0	0	0	0	0	0	0	0	0	1	0	0	0	402	648	234	2.61	0.13	0.95	0.98
hSQ043879	NM_001047434	DPH3	285381	3.67	0	0	1.07	4.14	-1.98	5.14	24.64	2.49	1.68	-0.15	21.69	58.8	0.86	0.85	0.36	108.17	100	2.53	2.76	0	0	0	0	0	0	0	0	0	0	0	0	0	0	0	306	174	103	3.06	-0.81	0.99	1.09
hSQ003259	NM_002211	ITGB1	3688	3.66	0	0	-1.55	1.43	-2.13	4.63	17.69	-1.3	-2.41	-2.8	14.69	20.39	0.94	0.81	-2.89	23.13	32.08	7	5.33	4	2	2	0	0	2	0	0	1	0	0	0	0	0	0	1177	2397	126	2.97	-1.11	0.86	0.76
hSQ026100	NM_001077426	ZNF586	54807	3.66	0	0	0.07	2.9	-0.38	92.38	100	-1.11	-1.31	1.1	27.27	55.94	0.47	0.59	-1.24	66.03	97.57	5.48	4.59	1	1	1	0	0	0	0	0	0	0	0	0	0	0	0	1267	633	186	2.84	-0.2	1.27	0.84
hSQ036177	NM_031469	SH3BGRL2	83699	3.66	0	0	1.81	5.44	-1.4	15.82	63.86	1.57	0.65	-1.81	14.69	32.12	0.92	0.78	-0.44	108.64	100	4.31	4.01	3	1	0	0	0	0	0	0	0	0	0	0	0	0	0	4143	324	179	3.63	-0.92	0.85	0.93
hSQ008789	NM_182505	C9orf85	138241	3.65	0	0	-0.69	3.91	-0.71	84.11	100	0.35	-0.35	2.69	14.69	28.32	0.36	0.64	0.42	108.17	100	3.41	3.72	1	1	1	0	0	0	1	0	0	0	0	0	0	0	0	611	474	228	4.6	-0.69	1.76	1.09
hSQ004488	NM_198256	E2F6	1876	3.65	0	0	0.58	2.93	-0.77	74.83	100	0.75	0.35	-1.55	14.69	36.4	0.86	0.82	0.2	108.17	100	4.43	4.54	1	2	0	1	0	0	0	0	0	0	0	0	0	0	0	2101	846	292	2.35	-0.4	0.95	1.03
hSQ032011	NM_017540	GALNT10	55568	3.65	0	0	-0.08	3.06	-1.49	13.85	56.87	-1.62	-2.38	-1.92	14.69	30.5	0.93	0.84	-1.15	76.95	100	5.08	4.5	4	3	2	0	0	0	0	0	0	0	0	0	0	0	0	3277	825	258	3.15	-0.77	0.91	0.89
hSQ036830	NM_001012333	MDK	4192	3.65	0	0	0.19	3	-0.62	91.61	100	-0.08	-0.34	0.17	29.81	60.79	0.9	0.91	0.22	108.17	100	4.54	4.68	2	1	1	0	0	0	0	0	0	0	0	0	0	0	0	330	432	134	2.81	-0.26	1.01	1.03
hSQ043099	NM_006479	RAD51AP1	10635	3.64	0	0	1.81	5.77	-2.38	2.6	9.42	1.03	-0.37	-0.3	21.69	57.25	0.88	0.86	-0.7	108.64	100	5.65	5.05	1	1	1	0	0	0	0	0	0	0	0	0	0	0	0	1055	1008	50	3.96	-1.4	0.98	0.89
hSQ001574	NA	LOC400960	400960	3.63	0	0	-0.14	2.31	-0.08	92.38	100	-0.19	-0.23	1.68	22.99	46.89	0.39	0.52	-0.28	108.64	100	2.54	2.37	NA	NA	NA	NA	NA	NA	NA	NA	NA	NA	NA	NA	NA	NA	NA	NA	NA	NA	2.45	-0.05	1.34	0.94
hSQ001629	NM_006320	PGRMC2	10424	3.63	0	0	-1.76	0.91	-2.52	2.12	6.18	0.59	-0.7	-1.74	14.69	33.31	0.8	0.69	-0.79	108.64	100	4.15	3.67	1	1	1	1	1	0	0	0	0	0	NA	NA	NA	NA	NA	1174	672	NA	2.67	-1.29	0.86	0.88
hSQ031392	NA	DNMBP	23268	3.62	0	0	2.54	4.9	-1.12	30.1	85.42	-1.34	-1.84	0.18	29.81	60.82	0.84	0.85	-2.04	34.95	54.89	6.49	5.67	NA	NA	NA	NA	NA	NA	NA	NA	NA	NA	NA	NA	NA	NA	NA	NA	NA	NA	2.36	-0.51	1.01	0.87
hSQ021708	NM_017784	OSBPL10	114884	3.62	0	0	0.95	3.45	-1.98	5.14	24.75	-1.36	-2.38	-1.57	14.69	36.09	0.92	0.88	-1.83	34.95	65.32	6.48	5.6	1	1	1	0	0	2	2	0	0	0	0	0	0	0	0	1246	2295	381	2.5	-1.01	0.95	0.86
hSQ025549	NM_006014	LAGE3	8270	3.62	0	0	0.49	2.83	0.19	90.93	100	2.91	3.01	-1.19	14.69	42.97	0.98	0.94	0.63	108.17	100	4.83	5.17	0	0	0	0	0	1	1	1	0	0	0	0	0	0	0	1042	432	342	2.35	0.11	0.97	1.07
hSQ027041	NM_020639	RIPK4	54101	3.62	0	0	2.4	5.49	-2.13	4.63	17.73	-1.89	-2.78	-2.66	14.69	21.53	0.9	0.81	-1.72	34.95	71.55	7.21	5.6	2	3	2	0	0	0	1	0	0	0	NA	NA	NA	NA	NA	1469	2355	NA	3.09	-0.88	0.91	0.78
hSQ043122	NM_017811	UBE2R2	54926	3.62	0	0	-0.6	2.06	-0.71	84.11	100	1.2	0.85	0.66	29.81	60.14	0.84	0.87	-0.39	108.64	100	6.01	5.79	0	0	0	0	0	2	1	1	0	0	0	0	0	0	0	3164	717	574	2.66	-0.35	1.04	0.96
hSQ009716	NM_007236	CHP	11261	3.62	0	0	1.02	3.9	-2.46	2.6	7.47	-0.2	-1.49	-0.03	21.69	59.77	0.76	0.76	-0.38	108.64	100	4.37	4.1	3	2	1	1	1	1	0	0	0	0	0	0	0	0	0	2496	588	144	2.89	-1.28	1	0.94
hSQ045264	NM_002033	FUT4	2526	3.61	0	0	2.03	4.84	-2.52	2.12	6.14	-0.24	-1.5	-2.7	14.69	21.14	0.87	0.79	-0.19	108.64	100	4.05	3.92	1	2	0	0	0	1	2	1	1	1	0	0	0	0	0	4171	1593	173	2.8	-1.25	0.92	0.97
hSQ019140	NA	RRP15::KIAA0507	51018::57241	3.61	0	0	-1.15	1.84	-1.43	13.85	61.17	1.34	0.45	-1.18	14.69	43.2	0.93	0.87	-1.02	108.17	100	5.74	4.96	NA	NA	NA	NA	NA	NA	NA	NA	NA	NA	NA	NA	NA	NA	NA	NA	NA	NA	2.99	-0.89	0.94	0.86
hSQ002591	NM_012401	PLXNB2	23654	3.61	0	0	-0.9	1.95	-0.51	92.38	100	-1.46	-1.7	-0.1	21.69	59.26	0.85	0.85	-1.35	56.69	92.35	6.02	5.07	3	1	1	1	1	3	4	1	0	0	0	0	0	0	0	725	5517	75	2.85	-0.24	1	0.84
hSQ022289	NM_020731	AHRR	57491	3.6	0	0	0.87	3.55	-0.98	43.3	95.31	1.81	1.29	-0.32	21.69	56.97	0.81	0.79	-0.14	108.64	100	4.18	4.09	1	3	1	0	0	1	4	1	0	0	NA	NA	NA	NA	NA	3454	2160	NA	2.68	-0.51	0.98	0.98
hSQ015974	NM_002524	NRAS	4893	3.6	0	0	0.3	3.22	-2.36	2.6	10.01	0.13	-1.06	-0.61	21.69	53.04	0.9	0.87	0.15	108.17	100	3.46	3.55	1	1	1	0	0	0	0	0	0	0	0	0	0	0	0	1130	570	254	2.92	-1.19	0.97	1.03
hSQ009052	NM_001018159	NAE1	8883	3.6	0	0	1.6	4.24	0.12	90.93	100	1.79	1.86	-1.42	14.69	38.81	0.97	0.92	-0.92	108.64	100	7.05	6.48	1	0	0	0	0	1	1	1	1	1	0	0	0	0	0	130	1587	193	2.64	0.07	0.95	0.92
hSQ005898	NM_006496	GNAI3	2773	3.6	0	0	1.38	4.26	-3.2	1.6	0.3	0.42	-1.34	-2.82	14.69	20.22	0.94	0.87	-1.54	44.12	81.87	8.16	7	3	3	2	0	0	0	0	0	0	0	NA	NA	NA	NA	NA	2031	1065	NA	2.87	-1.77	0.93	0.86
hSQ030767	NM_002196	INSM1	3642	3.57	0	0	2.28	5.12	-0.98	43.3	95.29	4.85	4.2	-0.01	21.69	59.87	0.59	0.59	-0.66	108.64	100	4.92	4.56	3	1	1	0	0	0	0	0	0	0	0	0	0	0	0	1146	1533	147	2.84	-0.65	1	0.93
hSQ026522	NM_021158	TRIB3	57761	3.55	0	0	1.75	5.74	-3.11	1.6	0.5	-0.74	-2.11	-3.03	9.63	18.74	0.93	0.81	0.08	108.17	100	4.38	4.42	2	2	1	0	0	0	0	0	0	0	0	0	0	0	0	867	1077	506	3.99	-1.37	0.87	1.01
hSQ009171	NM_021198	CTDSP1	58190	3.55	0	0	1.55	5.19	-3.82	0	0.65	-0.21	-2.46	-2.69	14.69	21.3	0.73	0.51	-1.13	76.95	100	3.34	2.87	8	5	4	1	0	0	0	0	0	0	0	0	0	0	0	1515	786	336	3.64	-2.25	0.71	0.86
hSQ016131	NM_003627	SLC43A1	8501	3.54	0	0	-1.37	2.01	-0.69	84.11	100	-0.27	-0.54	0.07	29.81	60.38	0.75	0.76	-0.19	108.64	100	4.93	4.83	0	1	0	0	0	5	3	2	1	0	0	0	0	0	0	561	1680	256	3.39	-0.27	1	0.98
hSQ021278	NM_015473	HEATR5A	25938	3.52	0	0	-0.68	1.55	-1.03	43.3	91.89	-1.93	-2.46	-0.54	21.69	54.06	0.87	0.85	0.43	108.17	100	5.76	6.04	1	0	0	0	0	8	5	1	2	1	0	0	0	0	0	159	5262	77	2.23	-0.54	0.97	1.05
hSQ016783	NM_018441	PECR	55825	3.51	0	0	-0.1	4.62	-1.23	25.69	76.78	-1.53	-2.39	0.24	29.81	60.97	0.86	0.88	0.78	108.17	100	4.65	5.15	2	1	1	1	0	0	0	0	0	0	0	0	0	0	0	863	912	68	4.72	-0.87	1.02	1.11
hSQ005204	NM_152743	C7orf27	221927	3.51	0	0	-0.66	2.53	-0.83	65.69	100	-0.32	-0.72	-0.19	21.69	58.39	0.86	0.84	0.14	108.17	100	6.04	6.19	0	0	0	0	0	1	3	1	0	0	NA	NA	NA	NA	NA	188	2466	NA	3.19	-0.41	0.98	1.02
hSQ013739	NM_000182	HADHA	3030	3.5	0	0	0.13	2.74	-1.41	13.85	62.48	0.11	-0.48	-0.55	21.69	53.99	0.82	0.8	-0.9	108.64	100	8.29	7.55	1	1	1	0	0	1	2	0	0	0	0	0	0	0	0	614	2292	130	2.61	-0.59	0.98	0.91
hSQ039628	NM_003645	SLC27A2	11001	3.49	0	0	-0.57	2.29	-0.18	92.38	100	-1.11	-1.2	-0.98	14.69	46.73	0.94	0.91	-0.33	108.64	100	8.74	8.56	0	0	0	0	0	3	2	0	1	0	0	0	0	0	0	277	1863	203	2.86	-0.09	0.98	0.98
hSQ027824	NM_175902	FLJ22222	79701	3.49	0	0	0.92	4.05	-1.48	13.85	57.64	1.41	0.63	-0.8	19.17	49.97	0.95	0.91	0.22	108.17	100	4.42	4.52	1	1	1	1	1	0	0	0	0	0	0	1	0	0	0	351	996	91	3.13	-0.78	0.97	1.02
hSQ023989	NM_080670	SLC35A4	113829	3.49	0	0	2.25	4.82	-2.57	2.12	5.2	2.27	0.7	-4.52	9.63	14.74	0.94	0.85	-0.48	108.64	100	4.29	3.77	1	1	1	0	0	0	0	0	0	0	0	0	0	0	0	954	975	728	2.57	-1.57	0.91	0.88
hSQ032602	NM_025204	TRABD	80305	3.49	0	0	1.03	3.64	-0.63	91.61	100	1.97	1.71	-1.31	14.69	40.71	0.81	0.78	0.3	108.17	100	4.02	4.23	1	2	1	0	0	1	2	1	0	0	0	0	0	0	0	1079	1131	105	2.61	-0.26	0.96	1.05
hSQ010497	NM_032458	PHF6	84295	3.48	0	0	-1.87	0.68	-2.42	2.6	8.48	2.51	1.47	-1.74	14.69	33.29	0.95	0.88	-2.23	34.95	46.97	8.32	7.3	2	1	1	2	1	0	0	0	0	0	0	0	0	0	0	3461	1098	202	2.55	-1.04	0.93	0.88
hSQ005355	NM_017785	CCDC99	54908	3.47	0	0	-0.91	2.97	-1.98	5.14	24.66	2.34	1.22	-0.93	14.69	47.56	0.91	0.86	-0.48	108.64	100	6.26	5.71	1	1	1	0	0	0	1	0	0	0	0	0	0	0	0	570	1818	140	3.89	-1.12	0.95	0.91
hSQ008766	NM_198507	TMEM157::UNQ1912	345757	3.46	0	0	-0.56	2.49	-2.7	2.12	3.31	0.37	-0.67	-2.19	14.69	26.71	0.93	0.87	0.21	108.17	100	3.4	3.54	1	1	1	0	0	0	0	0	0	0	0	0	0	0	0	553	573	111	3.05	-1.04	0.94	1.04
hSQ041956	NM_017814	TMEM161A	54929	3.45	0	0	-0.43	1.83	-0.84	58.83	100	1.81	1.41	-0.6	21.69	53.15	0.83	0.8	-0.72	108.64	100	6.22	5.62	0	1	0	0	0	3	4	1	0	0	NA	NA	NA	NA	NA	308	1440	NA	2.26	-0.4	0.97	0.9
hSQ023250	NM_001042574	CRTC3	64784	3.45	0	0	2.05	4.54	-2.53	2.12	6.06	0.52	-0.56	-0.3	21.69	57.27	0.84	0.82	-0.81	108.64	100	4.87	4.51	2	3	2	2	2	1	1	0	0	0	0	0	0	0	0	3204	1857	106	2.49	-1.08	0.99	0.93
hSQ002653	NM_020458	TTC7A	57217	3.44	0	0	1.21	4.57	-2.06	4.63	20.69	-2.17	-3.2	-0.61	21.69	53.04	0.81	0.77	-2.12	34.95	51.43	5.78	4.17	4	4	3	0	0	1	1	0	0	0	0	0	0	0	0	2212	2577	368	3.36	-1.03	0.96	0.72
hSQ043162	NM_014079	KLF15	28999	3.42	0	0	2.86	5.17	-1.64	9.09	45.43	1.41	0.49	-0.2	21.69	58.29	0.91	0.9	0.48	108.17	100	3.92	4.17	4	3	3	0	0	0	1	0	0	0	0	0	0	0	0	1092	1251	183	2.31	-0.91	0.99	1.06
hSQ038608	NM_018090	NECAP2	55707	3.41	0	0	3.12	5.46	-4.99	0	2	1.13	-0.93	-6.09	8.9	13.29	0.96	0.86	-1.57	44.12	80.34	5.68	4.55	1	1	1	1	1	1	0	0	0	0	NA	NA	NA	NA	NA	1187	792	NA	2.34	-2.06	0.9	0.8
hSQ001053	NM_017644	KLHL24	54800	3.41	0	0	-1.05	2.17	-2.75	2.12	2.76	-2.36	-3.52	-0.86	19.17	48.93	0.9	0.84	-2.76	27.18	33.48	7.24	5.13	5	3	3	2	1	0	0	0	0	0	0	0	0	0	0	5228	1803	295	3.22	-1.16	0.93	0.71
hSQ027384	NM_022460	HS1BP3	64342	3.4	0	0	0.88	3.68	-1.87	5.84	30.39	0.7	-0.29	-1.84	14.69	31.65	0.93	0.88	-0.43	108.64	100	6.35	5.97	3	1	1	1	1	0	0	0	0	0	NA	NA	NA	NA	NA	1183	1179	NA	2.8	-1	0.94	0.94
hSQ022120	NM_173552	C3orf58	205428	3.4	0	0	1.28	3.99	-1.78	7.95	36.36	0.11	-0.92	-0.71	21.69	51.44	0.84	0.8	-0.94	108.64	100	6.16	5.47	1	1	1	0	0	0	0	0	0	0	0	0	0	0	0	2518	1293	262	2.71	-1.04	0.96	0.89
hSQ021901	NM_001497	B4GALT1	2683	3.39	0	0	2.12	4.84	-3.14	1.6	0.41	-0.09	-1.46	-2.23	14.69	26.1	0.88	0.74	-1.49	48.64	84.56	5.58	4.28	6	5	3	1	1	0	0	0	0	0	0	0	0	0	0	2810	1197	64	2.73	-1.36	0.84	0.77
hSQ035355	NM_015473	HEATR5A	25938	3.39	0	0	-1.22	1.3	-1.15	30.1	82.63	-1.38	-1.96	-1.94	14.69	30.22	0.93	0.89	-0.24	108.64	100	6.82	6.6	1	0	0	0	0	8	5	1	2	1	0	0	0	0	0	159	5262	77	2.53	-0.57	0.96	0.97
hSQ011135	NM_014762	DHCR24	1718	3.39	0	0	0.43	3.37	-0.96	52.46	96.6	-0.36	-0.93	-1.58	14.69	36.01	0.93	0.88	-1.55	44.12	81.28	8.03	7.08	1	1	1	1	1	0	3	0	0	0	0	0	0	0	0	2606	1551	129	2.95	-0.57	0.94	0.88
hSQ022379	NM_004781	VAMP3	9341	3.38	0	0	-1.18	1.17	-6.25	0	2.1	1.82	-1.22	-6.12	8.9	13.28	0.94	0.72	-0.71	108.64	100	3.86	3.38	5	3	3	1	1	0	0	0	0	0	0	0	0	0	0	1786	303	115	2.35	-3.04	0.77	0.88
hSQ028910	NA	LOC25845	25845	3.38	0	0	3.02	5.42	-2.64	2.12	4.21	0.73	-0.61	-1.23	14.69	42.19	0.71	0.62	0.23	108.17	100	3.18	3.3	NA	NA	NA	NA	NA	NA	NA	NA	NA	NA	NA	NA	NA	NA	NA	NA	NA	NA	2.4	-1.34	0.88	1.04
hSQ031535	NM_030969	TMEM14B	81853	3.37	0	0	0.17	3.72	-0.24	92.38	100	2.36	2.21	-0.17	21.69	58.61	0.97	0.96	0.49	108.17	100	4.17	4.52	0	0	0	0	0	1	1	1	0	0	0	0	0	0	0	459	345	109	3.55	-0.15	0.99	1.08
hSQ002583	NM_016016	SLC25A39	51629	3.37	0	0	0.3	2.35	-0.74	74.83	100	2.13	1.71	-1.5	14.69	37.28	0.91	0.81	0.17	108.17	100	5.18	5.37	1	1	1	0	0	2	2	0	0	0	0	0	0	0	0	373	1056	69	2.05	-0.42	0.9	1.04
hSQ033122	NM_004275	MED20	9477	3.37	0	0	-0.58	1.78	-1.93	5.14	27.47	0.63	-0.32	-3.02	9.63	18.81	0.93	0.86	-2.03	34.95	55.28	6.83	5.62	1	1	1	1	1	1	0	0	1	0	0	0	0	0	0	1717	639	121	2.36	-0.95	0.92	0.82
hSQ016896	NM_006275	SFRS6	6431	3.37	0	0	0.95	3.26	-0.51	92.38	100	2.04	1.71	-1.76	14.69	33.02	0.95	0.86	-0.38	108.64	100	6.92	6.65	2	1	1	1	0	0	0	0	0	0	0	0	0	0	0	2538	1035	156	2.31	-0.33	0.91	0.96
hSQ028375	NM_017966	VPS37C	55048	3.36	0	0	2	5.11	-1.83	5.84	33.12	1.35	0.1	-4.9	9.63	14.39	0.91	0.79	-0.61	108.64	100	4.43	4.11	3	4	2	0	0	0	1	0	0	0	0	0	0	0	0	1564	1068	60	3.11	-1.25	0.87	0.93
hSQ034945	NM_001033024	FBXO7	25793	3.35	0	0	0.87	3.07	-0.47	92.38	100	1.38	1.12	-0.65	21.69	52.34	0.9	0.88	-0.52	108.64	100	6.64	6.4	0	0	0	0	0	2	1	1	0	0	0	0	0	0	0	300	1332	125	2.2	-0.26	0.98	0.96
hSQ034297	NM_001042440	CAST	831	3.33	0	0	-0.21	2.69	-2.08	4.63	19.91	-0.65	-1.71	-0.01	21.69	59.89	0.85	0.85	-0.71	108.64	100	6.34	5.95	2	1	0	0	0	1	0	0	0	0	0	0	0	0	0	2063	2253	186	2.9	-1.07	1	0.94
hSQ018290	NM_001007538	TMEM46	387914	3.33	0	0	-0.25	1.76	-1.32	21.42	69.9	0.11	-0.73	-3.14	9.63	18.07	0.93	0.87	-0.29	108.64	100	5.55	5.33	2	1	0	0	0	0	0	0	0	0	0	0	0	0	0	1916	888	85	2.01	-0.84	0.94	0.96
hSQ028166	NM_017851	PARP16	54956	3.32	0	0	1.59	3.84	-2.19	4.63	15.46	0.47	-0.48	0.34	29.81	61.08	0.73	0.75	-0.73	108.64	100	5.12	4.71	5	1	1	1	1	0	0	0	0	0	0	0	0	0	0	1307	972	254	2.26	-0.96	1.02	0.92
hSQ018248	NM_005186	CAPN1	823	3.32	0	0	0	2.76	-1.15	30.1	83.02	-1.17	-1.85	-0.33	21.69	56.85	0.87	0.86	0.15	108.17	100	7.47	7.63	2	2	2	0	0	0	1	0	0	0	0	0	0	0	0	719	2145	143	2.76	-0.68	0.99	1.02
hSQ037764	NM_153367	C10orf56	219654	3.31	0	0	2.2	5.28	-2.11	4.63	18.6	-1.43	-2.43	-1.57	14.69	36.19	0.89	0.84	0.08	108.17	100	3.92	3.98	4	3	1	2	1	1	0	0	0	0	0	0	0	0	0	4018	726	184	3.07	-0.99	0.95	1.01
hSQ036356	NM_017802	HEATR2	54919	3.3	0	0	-0.43	2	-1.76	7.95	37.24	0.47	-0.33	-1.92	14.69	30.49	0.95	0.9	-0.58	108.64	100	8.08	7.2	0	1	0	0	0	0	1	0	0	0	NA	NA	NA	NA	NA	820	2568	NA	2.43	-0.81	0.95	0.89
hSQ020685	NM_198275	MPZL3	196264	3.29	0	0	-0.82	1.61	-2.3	3.76	11.57	-0.94	-1.98	-3.41	9.63	16.86	0.83	0.74	-1.16	76.95	100	4.41	3.5	0	0	0	0	0	0	1	0	0	0	NA	NA	NA	NA	NA	272	708	NA	2.43	-1.04	0.89	0.79
hSQ008186	NM_006868	RAB31	11031	3.29	0	0	-0.35	2.03	-0.46	92.38	100	-0.52	-0.77	0.51	29.81	60.82	0.81	0.88	0.58	108.17	100	3.22	3.49	2	0	0	1	0	2	2	2	0	0	0	0	0	0	0	3225	588	100	2.38	-0.25	1.09	1.08
hSQ012369	NM_001048201	UHRF1	29128	3.28	0	0	-0.83	1.48	-1.93	5.14	27.41	0.65	-0.27	-2.17	14.69	26.89	0.97	0.91	-4.16	0	41.38	9.91	7.46	1	1	1	0	0	0	0	0	0	0	0	0	0	0	0	1350	2381	168	2.32	-0.92	0.94	0.75
hSQ038239	NM_024959	SLC24A6	80024	3.27	0	0	0.92	3.86	-1.61	9.09	47.8	-0.27	-1.13	-2.27	14.69	25.66	0.91	0.84	-1.47	48.64	85.57	5.31	4.25	2	3	1	1	0	1	0	0	0	0	0	0	0	0	0	1010	1755	210	2.94	-0.86	0.93	0.8
hSQ006709	NM_024779	PIP4K2C	79837	3.26	0	0	1.71	5.43	-1.77	7.95	36.93	-0.36	-1.33	-2.27	14.69	25.63	0.93	0.85	-2.21	34.95	47.53	7.35	5.83	2	1	1	0	0	0	1	0	0	0	NA	NA	NA	NA	NA	1640	1266	NA	3.72	-0.97	0.92	0.79
hSQ021281	NM_001003712	OSBPL8	114882	3.26	0	0	-1.41	0.79	-1.87	5.84	30.87	-1.55	-2.54	-1.75	14.69	33.06	0.96	0.92	0.17	108.17	100	5.75	5.9	3	2	2	0	0	2	0	0	1	0	0	1	0	0	0	4089	2544	560	2.2	-0.99	0.95	1.02
hSQ031728	NM_001099650	GLT8D3	283464	3.26	0	0	0.09	2.7	-3.4	1.6	0.17	0.12	-1.3	-2.19	14.69	26.64	0.9	0.84	-1.31	59.85	94.27	5.74	4.78	6	2	2	3	1	0	0	0	0	0	0	0	0	0	0	5940	1230	225	2.61	-1.42	0.93	0.83
hSQ027790	NM_004473	FOXE1	2304	3.25	0	0	1.45	3.89	-0.94	52.46	97.54	3.16	2.74	1.01	27.27	57.09	0.6	0.73	-1.04	85.33	100	5.66	5.04	1	1	1	0	0	0	0	0	0	0	0	0	0	0	0	1668	1122	660	2.44	-0.42	1.21	0.89
hSQ041842	NM_030802	FAM117A	81558	3.25	0	0	2.64	5.28	-2.19	4.63	15.28	0.19	-0.8	0.19	29.81	60.85	0.76	0.78	-0.27	108.64	100	4.54	4.38	2	1	1	0	0	1	1	0	0	0	0	0	0	0	0	928	1362	70	2.64	-0.99	1.03	0.97
hSQ024710	NM_001098634	RBM47	54502	3.24	0	0	0.74	3.77	-2.65	2.12	4.04	-2.73	-3.89	-1.86	14.69	31.33	0.9	0.81	-3.88	4.53	37.87	7.08	4.61	4	4	2	2	1	0	1	0	0	0	2	0	0	0	0	2649	1782	710	3.03	-1.16	0.89	0.65
hSQ001461	NM_022764	MTHFSD	64779	3.24	0	0	1.26	3.67	-0.67	90.93	100	-0.35	-0.75	-0.7	21.69	51.64	0.85	0.81	-0.93	108.64	100	5.08	4.36	1	2	1	1	1	0	0	0	0	0	0	0	0	0	0	1834	1149	51	2.42	-0.41	0.96	0.86
hSQ018035	NM_005486	TOM1L1	10040	3.24	0	0	-0.77	1.55	-2.78	1.97	2.5	1.93	0.83	-1.41	14.69	38.99	0.89	0.82	-0.55	108.64	100	5.43	5.08	1	1	1	0	0	0	0	0	0	0	NA	NA	NA	NA	NA	716	1431	NA	2.31	-1.1	0.93	0.94
hSQ027645	NM_014021	SSX2IP	117178	3.23	0	0	-0.13	2.4	-0.54	92.38	100	0.14	-0.16	-0.93	14.69	47.72	0.93	0.9	-0.02	108.64	100	5.41	5.4	0	1	0	0	0	2	2	2	0	0	0	0	0	0	0	3517	1845	266	2.52	-0.3	0.96	1
hSQ042826	NM_001005861	RYK	6259	3.23	0	0	-0.94	1.61	-2.3	3.76	11.77	0.27	-0.97	0.52	29.81	60.8	0.76	0.81	-0.32	108.64	100	2.79	2.61	2	2	1	1	1	1	1	0	1	0	0	0	0	0	0	1019	1831	90	2.54	-1.24	1.06	0.93
hSQ012055	NM_005526	HSF1	3297	3.23	0	0	-0.88	1.47	-0.65	90.93	100	0.82	0.36	-0.22	21.69	58.07	0.89	0.88	-0.04	108.64	100	4.1	4.08	1	0	0	0	0	0	1	0	0	0	0	0	0	0	0	392	1590	170	2.35	-0.46	0.99	1
hSQ014748	NM_001098520	HTATIP2	10553	3.22	0	0	-1.28	1.18	-2.47	2.6	7.16	-1.08	-2.14	-0.98	14.69	46.83	0.88	0.83	-0.48	108.64	100	3.79	3.54	1	1	1	0	0	1	1	0	0	0	0	0	0	0	0	578	831	69	2.46	-1.05	0.94	0.93
hSQ027246	NM_139164	STARD4	134429	3.22	0	0	-0.07	2.19	-1.67	9.09	43.41	-1	-1.76	-2.35	14.69	24.7	0.82	0.74	-2.62	28.06	35.62	4.67	3.59	1	3	1	1	1	0	0	0	0	0	0	0	0	0	0	1562	618	84	2.26	-0.75	0.9	0.77
hSQ039264	NM_020062	SLC2A4RG	56731	3.22	0	0	1.77	4.27	-1.52	11.29	54.54	-1.4	-2.25	1.86	22.31	43.75	0.21	0.4	0.51	108.17	100	2.77	3.14	0	1	0	0	0	1	0	0	0	0	0	0	0	0	0	1058	1164	55	2.5	-0.85	1.88	1.14
hSQ010485	NM_004447	EPS8	2059	3.21	0	0	0.48	3.33	-1.18	30.1	80.97	-1.54	-2.26	0.29	29.81	61.05	0.87	0.89	0.24	108.17	100	6.86	7.01	1	1	1	0	0	0	0	0	0	0	0	0	0	0	0	1175	2469	261	2.85	-0.72	1.02	1.02
hSQ038920	NM_032800	C1orf198	84886	3.2	0	0	1.78	3.87	-1.98	5.14	24.55	1.3	0.33	-1.48	14.69	37.75	0.9	0.87	-0.77	108.64	100	6.46	5.8	0	0	0	0	0	0	1	0	0	0	NA	NA	NA	NA	NA	2732	984	NA	2.08	-0.97	0.97	0.9
hSQ015731	NM_145251	STYX	6815	3.2	0	0	-1.03	2.16	-1.47	13.85	57.99	-1.37	-2.1	-1.19	14.69	42.96	0.84	0.77	-0.36	108.64	100	3.3	3.08	1	1	1	0	0	0	0	0	0	0	0	0	0	0	0	1656	672	261	3.18	-0.73	0.92	0.93
hSQ021962	NM_000183	HADHB	3032	3.18	0	0	3.03	6.54	-3.99	0	0.95	0.59	-1.8	-4.61	9.63	14.65	0.96	0.83	-3.03	19.19	31.37	10.86	7.04	0	1	0	0	0	1	0	0	0	0	0	1	0	0	0	511	1425	251	3.51	-2.39	0.86	0.65
hSQ013857	NM_002833	PTPN9	5780	3.18	0	0	0.91	4.38	-2.08	4.63	19.76	0.35	-0.77	0.82	29.12	59.02	0.87	0.89	0.27	108.17	100	4.88	5.12	2	1	1	1	1	1	0	0	1	0	0	0	0	0	0	1647	1782	508	3.47	-1.12	1.03	1.05
hSQ005338	NM_002086	GRB2	2885	3.18	0	0	1.8	4.22	-2.95	1.97	1.14	1.66	0.12	-3.06	9.63	18.53	0.98	0.91	-0.88	108.64	100	8.35	7.06	3	3	1	0	0	0	0	0	0	0	0	1	0	0	0	2292	654	357	2.42	-1.55	0.93	0.85
hSQ026626	NM_139014	MAPK14	1432	3.18	0	0	1.32	3.92	-2.02	4.63	22.89	0.52	-0.56	-4.71	9.63	14.56	0.95	0.85	-3.04	19.19	31.34	7.51	5.51	1	2	1	1	1	0	0	0	0	0	0	0	0	0	0	2391	924	362	2.6	-1.08	0.9	0.73
hSQ002956	NM_002473	MYH9	4627	3.17	0	0	-1.18	1.41	-1.68	9.09	42.4	-2.22	-3.21	-0.32	21.69	57.01	0.87	0.86	-2.66	27.18	34.9	8.28	6.3	2	1	1	1	1	1	3	1	0	0	0	0	0	0	0	1388	5883	149	2.59	-0.99	0.98	0.76
hSQ042222	NM_022044	SDF2L1	23753	3.17	0	0	-0.27	2.07	-2.85	1.97	1.83	2.33	0.68	-3.16	9.63	18	0.97	0.88	-0.52	108.64	100	5.22	4.98	1	1	1	0	0	1	1	1	0	0	0	0	0	0	0	123	666	84	2.34	-1.65	0.91	0.96
hSQ032607	NM_001759	CCND2	894	3.16	0	0	2.04	4.27	-2.62	2.12	4.51	-1.28	-2.45	-1.31	14.69	40.8	0.95	0.87	-1.58	44.12	79.46	7.48	5.81	5	3	1	2	1	0	0	0	0	0	0	0	0	0	0	5341	870	269	2.23	-1.17	0.92	0.78
hSQ004128	NM_001718	BMP6	654	3.15	0	0	-1.9	1.71	-2.17	4.63	16.09	-1.07	-2	-2.77	14.69	20.58	0.96	0.88	-1.12	76.95	100	5.87	4.94	4	1	1	2	1	0	0	0	0	0	0	0	0	0	0	1385	1542	178	3.61	-0.92	0.91	0.84
hSQ001120	NA	DISP1	84976	3.15	0	0	2.18	4.73	-2.01	4.63	23.19	0.25	-0.69	-0.25	21.69	57.82	0.76	0.75	-1.88	34.95	62.78	5.85	5.01	NA	NA	NA	NA	NA	NA	NA	NA	NA	NA	NA	NA	NA	NA	NA	NA	NA	NA	2.55	-0.94	0.99	0.86
hSQ045146	NM_003029	SHC1	6464	3.15	0	0	1.01	3.18	-0.67	90.93	100	-0.87	-1.19	-1.86	14.69	31.3	0.87	0.82	-1.31	59.85	94.33	5.75	5.07	1	2	1	0	0	0	1	0	0	0	0	0	0	0	0	1504	1425	120	2.17	-0.33	0.95	0.88
hSQ008242	NM_182920	ADAMTS9	56999	3.15	0	0	1.22	3.64	-1.45	13.85	59.85	-1.19	-1.89	0.2	29.81	60.89	0.85	0.86	-1.09	81.59	100	6.01	5.29	5	1	1	0	0	2	1	0	0	0	NA	NA	NA	NA	NA	1470	5808	NA	2.42	-0.7	1.01	0.88
hSQ021561	NM_015044	GGA2	23062	3.14	0	0	-0.45	2.12	-2.27	3.76	12.69	1.64	0.62	-3.45	9.63	16.71	0.96	0.87	-1.28	59.85	95.44	6.58	5.75	3	3	2	1	1	1	0	0	1	0	0	0	0	0	0	3267	1842	76	2.57	-1.03	0.91	0.87
hSQ045509	NM_004705	PRKRIR	5612	3.14	0	0	0.47	3.04	-0.33	92.38	100	0.67	0.5	0.89	28.63	58.33	0.6	0.71	0.58	108.17	100	4.64	4.97	0	0	0	0	0	2	1	1	2	1	NA	NA	NA	NA	NA	904	2286	NA	2.57	-0.17	1.18	1.07
hSQ005093	NA	LOC441104	441104	3.14	0	0	-0.59	1.68	-0.3	92.38	100	0.33	0.19	-0.94	14.69	47.38	0.83	0.79	0.16	108.17	100	3.43	3.52	NA	NA	NA	NA	NA	NA	NA	NA	NA	NA	NA	NA	NA	NA	NA	NA	NA	NA	2.27	-0.14	0.95	1.03
hSQ011189	NM_144570	HN1L	90861	3.14	0	0	0.95	3.4	-1.42	13.85	61.78	1.25	0.46	-2.53	14.69	22.8	0.97	0.91	-1.43	51.15	87.92	5.41	4.6	3	3	1	0	0	0	0	0	0	0	NA	NA	NA	NA	NA	3073	573	NA	2.45	-0.78	0.94	0.85
hSQ016704	NM_001084	PLOD3	8985	3.14	0	0	0.51	3.74	-0.58	92.3	100	-0.78	-1.11	-3.97	9.63	15.39	0.87	0.78	-2.12	34.95	51.35	7.21	4.85	1	2	1	0	0	0	0	0	0	0	0	0	0	0	0	303	2217	456	3.23	-0.33	0.89	0.67
hSQ019402	NM_001040181	CLDND1	56650	3.14	0	0	-0.41	1.91	-3	1.97	0.91	1.27	-0.16	-1.3	14.69	41	0.78	0.7	-1.46	48.64	86.11	3.9	3.14	1	1	1	0	0	0	0	0	0	0	0	0	0	0	0	1185	762	236	2.31	-1.43	0.9	0.81
hSQ027277	NM_005857	ZMPSTE24	10269	3.13	0	0	-0.73	2.11	-1.84	5.84	32.26	1.7	0.78	-2.04	14.69	28.64	0.94	0.89	-0.95	108.64	100	9	7.8	2	2	1	0	0	0	0	0	0	0	0	0	0	0	0	1515	1428	211	2.83	-0.92	0.95	0.87
hSQ019280	NM_152446	C14orf145	145508	3.13	0	0	0.49	3.1	-1.57	11.29	50.23	1	0	-1.91	14.69	30.63	0.85	0.78	-0.69	108.64	100	5.87	5.05	0	0	0	0	0	0	1	0	0	0	0	1	0	0	0	998	3285	171	2.61	-1	0.92	0.86
hSQ031647	NM_001100122	SBNO2	22904	3.12	0	0	1.43	3.88	-1.4	15.82	63.35	-0.62	-1.11	-0.49	21.69	54.82	0.89	0.87	-0.33	108.64	100	5.09	4.89	2	3	2	0	0	1	3	0	0	0	0	0	0	0	0	586	3930	77	2.45	-0.5	0.98	0.96
hSQ024961	NM_144563	RPIA	22934	3.12	0	0	-0.08	2.31	-0.45	92.38	100	1.74	1.47	-0.92	14.69	47.78	0.9	0.85	-0.48	108.64	100	4.77	4.5	2	0	0	2	0	0	0	0	0	0	NA	NA	NA	NA	NA	856	936	NA	2.38	-0.27	0.95	0.94
hSQ034607	NM_001031727	MGC3207	84245	3.11	0	0	0.72	3.44	-2.5	2.12	6.51	2.34	1.11	-1.05	14.69	45.45	0.86	0.81	-1.95	34.95	59.56	5.37	4.42	2	4	2	0	0	2	0	0	0	0	0	0	0	0	0	2000	1110	66	2.72	-1.22	0.94	0.82
hSQ000592	NM_145648	SLC15A4	121260	3.11	0	0	1.5	3.93	-2.65	2.12	4.01	0.24	-1	-1.12	14.69	44.16	0.8	0.75	-0.9	108.64	100	5.47	4.65	1	1	1	1	1	1	1	1	0	0	0	0	0	0	0	978	1734	53	2.43	-1.24	0.94	0.85
hSQ042659	NM_018290	PGM2	55276	3.11	0	0	-0.43	1.9	-3.25	1.6	0.24	0.64	-0.9	-3.21	9.63	17.74	0.94	0.87	-2.28	34.95	45.03	8.68	7.14	1	1	1	1	1	1	0	0	1	0	NA	NA	NA	NA	NA	1325	1839	NA	2.33	-1.55	0.93	0.82
hSQ014736	NM_021238	FAM60A	58516	3.11	0	0	-0.02	2.47	0.32	84.11	99.49	-0.07	0.07	-0.96	14.69	47.09	0.9	0.87	0.17	108.17	100	6.56	6.7	1	1	0	0	0	0	1	0	0	0	0	0	0	0	0	2119	666	274	2.5	0.15	0.98	1.02
hSQ041045	NM_002764	PRPS1	5631	3.1	0	0	1.61	3.71	-2.58	2.12	5.06	3.62	2.29	-2.78	14.69	20.54	0.98	0.92	-0.57	108.64	100	8.38	7.83	1	1	1	0	0	1	0	0	0	0	0	0	0	0	0	993	957	100	2.1	-1.33	0.94	0.93
hSQ017708	NM_052932	TMEM123	114908	3.1	0	0	-0.29	3.66	-0.24	92.38	100	-1.43	-1.61	2.5	19.17	31.82	0.79	0.9	0.42	108.17	100	4.15	4.53	1	0	0	0	0	1	1	1	0	0	0	0	0	0	0	2540	627	421	3.95	-0.18	1.14	1.09
hSQ031628	NM_003051	SLC16A1	6566	3.09	0	0	-0.68	2.77	-3.05	1.97	0.7	1.63	-0.5	-1.63	14.69	35.13	0.93	0.88	-1.14	76.95	100	11.3	8.73	1	2	1	1	1	3	0	0	0	0	0	0	0	0	0	2041	1503	363	3.44	-2.13	0.94	0.77
hSQ003849	NM_138471	LOC144097	144097	3.08	0	0	-0.98	1.76	-0.41	92.38	100	0.37	0.16	1.33	25.16	52.81	0.71	0.78	0.24	108.17	100	4.4	4.59	1	1	1	1	1	0	0	0	0	0	0	0	0	0	0	578	1146	236	2.75	-0.21	1.1	1.04
hSQ031045	NM_022371	TOR3A	64222	3.07	0	0	0.72	2.86	-1.1	35.24	86.54	1.61	1.17	-1.04	14.69	45.69	0.95	0.92	0.27	108.17	100	4.39	4.53	2	1	1	1	1	2	0	0	0	0	0	0	0	0	0	774	1194	152	2.14	-0.44	0.96	1.03
hSQ041380	NM_207352	CYP4V2	285440	3.07	0	0	0.34	3.19	-1.01	43.3	92.93	1.16	0.7	1.36	25.16	52.39	0.73	0.77	-0.45	108.64	100	3.25	3.02	3	5	1	0	0	1	1	1	1	1	0	0	0	0	0	2816	1578	304	2.85	-0.47	1.05	0.93
hSQ029811	NM_017953	C1orf181	54680	3.07	0	0	-1.34	0.69	-0.52	92.38	100	1.73	1.45	-1.98	14.69	29.56	0.88	0.81	-1.17	71.06	100	7.27	6.77	1	1	1	0	0	0	0	0	0	0	0	0	0	0	0	1249	1413	134	2.03	-0.28	0.92	0.93
hSQ004180	NM_031426	C9orf58	83543	3.07	0	0	1.3	3.7	-0.69	84.11	100	-0.56	-0.88	-0.5	21.69	54.63	0.9	0.88	-0.57	108.64	100	4.38	4.09	4	1	1	2	0	0	0	0	0	0	0	1	0	0	0	2830	453	105	2.4	-0.33	0.98	0.93
hSQ002887	NM_001033659	FLJ35848	284071	3.07	0	0	-1.54	0.74	-0.45	92.38	100	2.27	2.02	-0.64	21.69	52.59	0.93	0.9	0.78	108.17	100	5.82	6.38	0	0	0	0	0	0	0	0	0	0	0	0	0	0	0	1684	1869	516	2.28	-0.25	0.97	1.1
hSQ016931	NM_004339	PTTG1IP	754	3.06	0	0	1.62	4.17	-2.09	4.63	19.25	0.22	-1.2	-2.91	14.69	19.53	0.99	0.92	-1.06	85.33	100	5.77	4.92	2	2	1	1	1	0	1	0	0	0	0	0	0	0	0	1983	543	210	2.54	-1.42	0.93	0.85
hSQ043181	NM_138355	SCRN2	90507	3.06	0	0	1.08	3.1	-0.16	92.38	100	0.63	0.53	0.11	29.81	60.59	0.82	0.83	0.34	108.17	100	5.66	5.98	1	0	0	1	0	1	1	1	0	0	NA	NA	NA	NA	NA	152	1278	NA	2.02	-0.11	1.01	1.06
hSQ031569	NM_018351	FGD6	55785	3.04	0	0	-1.61	0.71	-0.74	74.83	100	-1.7	-2.03	-1.95	14.69	29.92	0.98	0.92	0.17	108.17	100	5.22	5.34	1	3	1	0	0	2	1	1	2	1	0	0	0	0	0	4771	4293	224	2.31	-0.33	0.94	1.02
hSQ042768	NM_006415	SPTLC1	10558	3.04	0	0	0.34	2.9	-2.24	3.76	13.58	0.39	-0.61	-1.95	14.69	30.03	0.93	0.86	-1	108.61	100	7.57	6.61	1	1	1	0	0	0	0	0	0	0	NA	NA	NA	NA	NA	1320	1422	NA	2.56	-1	0.93	0.87
hSQ026754	NM_002135	NR4A1	3164	3.04	0	0	0.24	3.18	-0.39	92.38	100	-2.03	-2.24	1.5	23.79	50	0.69	0.75	-0.04	108.64	100	4.27	4.24	2	1	1	0	0	1	1	0	0	0	0	0	0	0	0	557	1797	314	2.93	-0.21	1.1	0.99
hSQ023208	NM_014112	TRPS1	7227	3.04	0	0	1.51	3.78	-1.21	25.69	78.18	-0.67	-1.14	-1.68	14.69	34.21	0.91	0.86	-1.13	76.95	100	5.74	4.87	3	2	0	2	0	3	4	2	2	1	0	0	0	0	0	5527	3885	578	2.27	-0.48	0.95	0.85
hSQ009026	NM_001013438	FXR1	8087	3.04	0	0	-1.25	1.24	-1.39	15.82	63.9	-0.13	-0.85	-0.14	21.69	58.9	0.71	0.7	-0.98	108.61	100	7.19	6.14	1	1	1	0	0	0	0	0	0	0	NA	NA	NA	NA	NA	1022	1620	NA	2.5	-0.73	0.98	0.85
hSQ001980	NM_004205	USP2	9099	3.04	0	0	2.36	4.63	-2.61	2.12	4.6	2.23	1.17	0.61	29.81	60.42	0.84	0.85	0.06	108.17	100	5.37	5.41	0	0	0	0	0	0	2	0	0	0	0	0	0	0	0	592	1818	224	2.27	-1.06	1.02	1.01
hSQ042669	NM_005827	SLC35B1	10237	3.03	0	0	0.56	3.78	-0.67	90.93	100	2.32	1.91	-0.43	21.69	55.6	0.93	0.91	0.31	108.17	100	4.86	5.05	0	0	0	0	0	1	0	0	1	0	0	0	0	0	0	130	969	87	3.22	-0.41	0.98	1.04
hSQ039929	NA	NBPF10	440673	3.03	0	0	0.49	3.08	-0.5	92.38	100	0.47	0.24	-1.28	14.69	41.36	0.9	0.85	-0.91	108.64	100	4.82	4.2	NA	NA	NA	NA	NA	NA	NA	NA	NA	NA	NA	NA	NA	NA	NA	NA	NA	NA	2.58	-0.23	0.95	0.87
hSQ003066	NM_016474	C3orf19	51244	3.03	0	0	1.73	3.99	-0.45	92.38	100	0.9	0.66	-0.98	14.69	46.73	0.87	0.84	-1.66	37.98	75.29	5.73	4.9	2	3	2	1	1	1	0	0	0	0	0	0	0	0	0	1463	1404	91	2.26	-0.24	0.97	0.86
hSQ023000	NM_178507	OAF	220323	3.03	0	0	0.92	4.64	-4.53	0	1.68	-0.38	-2.34	0.25	29.81	60.99	0.8	0.81	0.2	108.17	100	3.72	3.8	2	2	2	0	0	0	0	0	0	0	0	0	0	0	0	798	822	241	3.73	-1.96	1.01	1.02
hSQ013699	NM_018023	YEATS2	55689	3.03	0	0	0.04	2.75	-0.38	92.38	100	-1.43	-1.59	-1.77	14.69	32.86	0.88	0.84	-1.36	56.69	91.79	5.7	5.05	2	3	1	1	1	1	2	0	0	0	0	0	0	0	0	2037	4269	195	2.71	-0.16	0.95	0.89
hSQ012084	NM_004685	MTMR6	9107	3.03	0	0	1.19	3.43	-1.42	13.85	62.2	0.69	-0.11	-2.92	14.69	19.49	0.95	0.9	-2.08	34.95	53.22	8.47	7.43	3	1	1	1	0	0	1	0	0	0	0	0	0	0	0	3029	1866	319	2.24	-0.8	0.94	0.88
hSQ004420	NM_138384	MTG1	92170	3.02	0	0	-0.45	1.73	-0.21	92.38	100	2.1	1.99	-1.01	14.69	46.15	0.84	0.78	0.15	108.17	100	3.95	4.03	1	1	1	0	0	0	1	0	0	0	0	0	0	0	0	504	1005	104	2.18	-0.11	0.92	1.02
hSQ028046	NM_138782	FCHO2	115548	3.02	0	0	1.9	4.77	-3.37	1.6	0.17	-0.43	-1.84	-0.34	21.69	56.71	0.8	0.77	-3.15	16.31	31.29	6.61	4.54	1	3	1	0	0	0	0	0	0	0	NA	NA	NA	NA	NA	2431	2433	NA	2.87	-1.41	0.96	0.69
hSQ008275	NM_004239	TRIP11	9321	3.02	0	0	1.47	4.85	-3.23	1.6	0.25	-0.61	-1.79	-2.96	14.69	19.16	0.94	0.89	-1.86	34.95	64.11	6.51	5.28	0	0	0	0	0	1	0	0	1	0	0	0	0	0	0	156	5940	357	3.38	-1.18	0.95	0.81
hSQ033066	NA	RHEB::RP11-38L15.1	6009::439965	3.01	0	0	0.36	2.68	-1.3	21.42	71.62	0.08	-0.92	2.3	19.17	35.36	0.63	0.77	-0.46	108.64	100	3.68	3.32	NA	NA	NA	NA	NA	NA	NA	NA	NA	NA	NA	NA	NA	NA	NA	NA	NA	NA	2.32	-1	1.21	0.9
hSQ029101	NM_006111	ACAA2	10449	3.01	0	0	-1.81	1.05	-3.09	1.6	0.54	0.13	-1.2	-1.23	14.69	42.14	0.91	0.85	-0.08	108.64	100	5.46	5.38	2	0	0	2	0	1	0	0	0	0	NA	NA	NA	NA	NA	342	1194	NA	2.86	-1.33	0.93	0.99
hSQ034048	NM_016262	TUBE1	51175	2.99	0	0	1.02	3.04	-1.06	35.24	89.48	1.2	0.72	0.45	29.81	60.98	0.71	0.75	0.13	108.17	100	3.71	3.78	0	0	0	0	0	1	0	0	0	0	NA	NA	NA	NA	NA	633	1428	NA	2.03	-0.49	1.05	1.02
hSQ026468	NM_003621	PPFIBP2	8495	2.99	0	0	1.46	3.89	-0.87	58.83	100	-2.22	-2.75	-0.38	21.69	56.26	0.84	0.82	-1.47	48.64	85.69	6.2	4.76	2	2	2	2	2	1	0	0	0	0	0	0	0	0	0	533	2631	336	2.43	-0.54	0.98	0.77
hSQ031849	NM_178439	GMCL1	64395	2.99	0	0	-0.58	1.55	-3.01	1.97	0.86	0.56	-0.6	-1.19	14.69	42.98	0.93	0.88	-0.36	108.64	100	2.88	2.7	1	0	0	0	0	2	2	2	0	0	0	0	0	0	0	591	1548	207	2.13	-1.16	0.95	0.94
hSQ019302	NM_012345	NUFIP1	26747	2.98	0	0	0.11	2.57	-0.47	92.38	100	2.15	1.9	-0.79	19.17	50.13	0.88	0.86	-2	34.95	56.68	8.38	7.33	4	2	1	2	0	0	0	0	0	0	NA	NA	NA	NA	NA	1957	1488	NA	2.46	-0.25	0.98	0.87
hSQ034343	NM_182505	C9orf85	138241	2.96	0	0	-2.08	0.48	-0.86	58.83	100	1.57	1.26	-0.16	21.69	58.73	0.73	0.71	-0.04	108.64	100	4.41	4.38	1	1	1	0	0	0	1	0	0	0	0	0	0	0	0	611	474	228	2.56	-0.32	0.97	0.99
hSQ017390	NM_001102594	DTX2	113878	2.96	0	0	0.64	3.51	-0.78	65.69	100	0.74	0.31	-3.64	9.63	16.1	0.93	0.87	-0.79	108.64	100	6.43	5.93	0	0	0	0	0	1	3	0	0	0	2	1	1	0	0	394	1869	436	2.86	-0.43	0.93	0.92
hSQ028948	NM_018325	C9orf72	203228	2.96	0	0	-0.53	1.87	-1.13	30.1	84.39	0.28	-0.19	-1.24	14.69	41.96	0.88	0.84	-0.41	108.64	100	4.66	4.44	2	1	1	1	0	2	0	0	0	0	0	1	0	0	0	1690	1446	92	2.4	-0.47	0.96	0.95
hSQ022228	NM_173797	PAPD4	167153	2.96	0	0	1.11	3.13	0.05	90.93	100	-0.8	-0.78	0.21	29.81	60.91	0.84	0.85	-0.08	108.64	100	4.85	4.8	1	0	0	1	0	1	1	1	0	0	0	0	0	0	0	1006	1455	299	2.02	0.02	1.01	0.99
hSQ003119	NM_004705	PRKRIR	5612	2.96	0	0	-0.93	1.03	-0.28	92.38	100	0.61	0.47	0.93	28.01	57.95	0.63	0.72	0.51	108.17	100	4.85	5.11	0	0	0	0	0	2	1	1	2	1	NA	NA	NA	NA	NA	904	2286	NA	1.97	-0.14	1.14	1.05
hSQ005499	NA	NBPF10	440673	2.95	0	0	1.44	3.87	-0.19	92.38	100	-1.13	-1.24	-0.67	21.69	52.06	0.84	0.82	0.56	108.17	100	2.89	3.26	NA	NA	NA	NA	NA	NA	NA	NA	NA	NA	NA	NA	NA	NA	NA	NA	NA	NA	2.43	-0.11	0.98	1.13
hSQ003348	NM_001414	EIF2B1	1967	2.94	0	0	-0.66	1.57	-1.01	43.3	93.06	1.59	1.09	-2.4	14.69	24.19	0.96	0.91	-0.86	108.64	100	5.97	5.53	2	1	1	0	0	0	0	0	0	0	0	0	0	0	0	733	918	143	2.23	-0.5	0.94	0.93
hSQ001967	NM_001099650	GLT8D3	283464	2.94	0	0	2.04	3.99	-2.62	2.12	4.43	1.1	-0.28	-2.05	14.69	28.49	0.93	0.86	-0.63	108.64	100	5.87	5.28	6	2	2	3	1	0	0	0	0	0	0	0	0	0	0	5940	1230	225	1.95	-1.38	0.92	0.9
hSQ026968	NM_079834	SCAMP4	113178	2.94	0	0	1.43	4.22	-1.45	13.85	59.82	2.12	1.1	-2.01	14.69	29.09	0.89	0.83	-0.41	108.64	100	5.59	5.38	1	2	1	1	1	0	0	0	0	0	0	0	0	0	0	1728	690	107	2.78	-1.02	0.94	0.96
hSQ034661	NM_002897	RBMS1	5937	2.94	0	0	2.38	4.55	-3.01	1.97	0.85	0.32	-1.06	-2.9	14.69	19.57	0.95	0.87	-2.63	28.06	35.51	6.71	5.39	2	0	0	1	0	0	0	0	0	0	0	0	0	0	0	768	1212	431	2.16	-1.38	0.91	0.8
hSQ029103	NM_001005360	DNM2	1785	2.93	0	0	0.73	3.47	-1.94	5.14	26.59	0.59	-0.69	-2.86	14.69	19.86	0.91	0.85	-0.94	108.64	100	8.05	7.13	1	3	1	0	0	0	1	0	0	0	0	0	0	0	0	856	2613	164	2.74	-1.29	0.93	0.89
hSQ038480	NM_003141	TRIM21	6737	2.93	0	0	-0.18	2.27	-1.01	43.3	92.99	-0.84	-1.29	1.3	26.28	53.18	0.79	0.84	-0.1	108.64	100	7.5	7.39	1	0	0	0	0	1	2	1	0	0	0	0	0	0	0	388	1428	113	2.45	-0.45	1.06	0.98
hSQ033428	NM_001037277	GGPS1	9453	2.92	0	0	-0.76	1.2	-0.75	74.83	100	1.76	1.43	-0.57	21.69	53.58	0.84	0.81	-0.29	108.64	100	4.01	3.87	1	2	1	1	1	0	0	0	0	0	0	0	0	0	0	1755	903	84	1.97	-0.33	0.97	0.96
hSQ035032	NM_024493	ZNF306	80317	2.92	0	0	-0.62	1.47	-0.21	92.38	100	1.35	1.25	1.28	26.28	53.58	0.65	0.73	-0.04	108.64	100	4.63	4.61	1	1	1	0	0	0	0	0	0	0	1	0	0	0	0	461	1617	148	2.09	-0.1	1.12	0.99
hSQ032026	NM_003104	SORD	6652	2.92	0	0	-0.9	1.21	-0.86	58.83	100	0.36	-0.06	-1.83	14.69	31.76	0.92	0.86	-0.41	108.64	100	7.01	6.69	2	2	2	1	1	0	0	0	0	0	0	0	0	0	0	1311	1074	141	2.11	-0.42	0.94	0.95
hSQ018575	NM_001018159	NAE1	8883	2.91	0	0	1.73	4.29	-0.11	92.38	100	2.77	2.7	-1.45	14.69	38.28	0.98	0.94	-0.48	108.64	100	7.75	7.26	1	0	0	0	0	1	1	1	1	1	0	0	0	0	0	130	1587	193	2.56	-0.07	0.96	0.94
hSQ018883	NA	LOC401606	401606	2.91	0	0	1.69	3.87	-0.79	65.69	100	1.58	1.06	-1.26	14.69	41.71	0.88	0.85	-0.82	108.64	100	8.62	8	NA	NA	NA	NA	NA	NA	NA	NA	NA	NA	NA	NA	NA	NA	NA	NA	NA	NA	2.18	-0.52	0.96	0.93
hSQ034887	NM_020179	C11orf75	56935	2.91	0	0	-1.33	0.5	-3.33	1.6	0.18	2.02	0.31	-0.17	21.69	58.58	0.85	0.83	-0.14	108.64	100	3.84	3.79	1	1	1	0	0	0	0	0	0	0	0	0	0	0	0	537	180	226	1.82	-1.71	0.98	0.98
hSQ002776	NM_004824	CDYL	9425	2.91	0	0	0.22	2.37	-0.21	92.38	100	-0.4	-0.51	0.24	29.81	60.98	0.82	0.83	0.05	108.17	100	5.41	5.44	1	0	0	0	0	0	3	0	0	0	0	0	0	0	0	1487	1797	131	2.15	-0.11	1.01	1
hSQ036909	NM_153371	LNX2	222484	2.91	0	0	1.35	3.78	-2.61	2.12	4.57	0.5	-0.77	-0.81	19.17	49.66	0.87	0.84	-0.97	108.63	100	6.66	5.89	1	1	1	0	0	3	2	0	0	0	0	0	0	0	0	2422	2073	309	2.43	-1.27	0.97	0.88
hSQ007510	NM_001687	ATP5D	513	2.9	0	0	-0.44	1.65	-0.06	92.38	100	1.56	1.53	-0.91	14.69	47.94	0.93	0.91	1.07	108.17	100	5.08	5.57	0	0	0	0	0	0	1	0	0	0	0	0	0	0	0	387	507	101	2.09	-0.04	0.98	1.1
hSQ011752	NM_000523	HOXD13	3239	2.9	0	0	-1.6	0.28	-0.23	92.38	100	5.18	4.94	-2.56	14.69	22.48	0.88	0.78	-0.19	108.64	100	3.7	3.58	1	0	0	0	0	1	1	1	1	1	0	0	0	0	0	1208	1032	87	1.88	-0.24	0.89	0.97
hSQ033297	NM_013232	PDCD6	10016	2.9	0	0	1.12	3.7	-0.94	52.46	97.35	2.35	1.82	-0.1	21.69	59.23	0.83	0.82	-0.17	108.64	100	4.24	4.13	1	1	1	1	1	1	0	0	0	0	1	1	1	0	0	459	576	100	2.58	-0.53	1	0.97
hSQ027906	NM_017724	LRRFIP2	9209	2.9	0	0	0.23	2.89	-1.23	25.69	76.99	1.02	0.49	0.62	29.81	60.36	0.84	0.88	-0.16	108.64	100	5.01	4.86	1	1	1	0	0	0	0	0	0	0	0	0	0	0	0	843	1203	108	2.66	-0.53	1.05	0.97
hSQ001874	NM_006868	RAB31	11031	2.9	0	0	0.09	2	-0.75	74.83	100	-0.87	-1.15	0.54	29.81	60.7	0.79	0.87	0.37	108.17	100	3.47	3.61	2	0	0	1	0	2	2	2	0	0	0	0	0	0	0	3225	588	100	1.91	-0.27	1.1	1.04
hSQ032399	NM_018062	FANCL	55120	2.9	0	0	-1.35	0.75	0.41	84.11	95.92	1.05	1.24	-1.93	14.69	30.3	0.95	0.9	0.07	108.17	100	6.64	6.69	0	0	0	0	0	1	1	0	1	0	0	0	0	0	0	520	1128	66	2.1	0.2	0.95	1.01
hSQ039576	NM_006341	MAD2L2	10459	2.89	0	0	-0.89	1.63	-1.58	11.29	49.66	0.84	0.13	-1.73	14.69	33.45	0.89	0.81	-0.03	108.64	100	4.31	4.29	0	0	0	0	0	0	0	0	0	0	0	0	0	0	0	294	636	104	2.52	-0.72	0.92	1
hSQ017799	NA	PTTG3	26255	2.89	0	0	0.46	2.71	0.53	84.11	90.98	0.86	1.19	-1.06	14.69	45.22	0.94	0.91	-0.47	108.64	100	5.58	5.25	NA	NA	NA	NA	NA	NA	NA	NA	NA	NA	NA	NA	NA	NA	NA	NA	NA	NA	2.24	0.33	0.97	0.94
hSQ004021	NM_133452	RAVER1	125950	2.89	0	0	0.05	2.58	-0.89	58.83	100	0.8	0.4	-1.18	14.69	43.12	0.9	0.86	-1.46	48.64	86.35	7.2	6.38	2	1	1	1	0	0	0	0	0	0	0	0	0	0	0	1241	2271	80	2.53	-0.4	0.96	0.89
hSQ011185	NM_173638	NBPF15	284565	2.88	0	0	0.39	2.99	-0.59	91.91	100	0.3	-0.04	-1.45	14.69	38.18	0.89	0.81	-0.4	108.64	100	4.58	4.25	1	1	1	0	0	1	1	1	0	0	0	0	0	0	0	1517	2013	489	2.6	-0.34	0.9	0.93
hSQ043486	NM_014481	APEX2	27301	2.87	0	0	0.97	4.46	-3.07	1.97	0.6	0.41	-1.01	-1.96	14.69	29.84	0.87	0.79	-0.26	108.64	100	5.38	5.25	1	1	1	1	1	0	1	0	0	0	0	0	0	0	0	343	1557	76	3.49	-1.43	0.9	0.98
hSQ008776	NM_000346	SOX9	6662	2.87	0	0	-0.26	1.95	-0.63	91.61	100	-1.82	-2.16	-0.5	21.69	54.59	0.87	0.85	-1.98	34.95	58	8.28	7.25	4	1	0	2	0	0	0	0	0	0	0	0	0	0	0	2024	1530	372	2.21	-0.34	0.98	0.88
hSQ011716	NM_001078650	TMEM134	80194	2.87	0	0	-0.53	1.43	-2.38	2.6	9.27	0.66	-0.36	0.43	29.81	61.01	0.64	0.66	0.17	108.17	100	3.89	3.96	1	1	1	1	1	1	1	0	0	0	0	0	0	0	0	266	543	68	1.96	-1.01	1.03	1.02
hSQ028439	NM_019110	ZKSCAN4	387032	2.87	0	0	-0.67	1.54	-0.38	92.38	100	1.18	1.01	-0.62	21.69	52.9	0.77	0.74	-0.83	108.64	100	5.84	5.16	0	0	0	0	0	0	0	0	0	0	1	0	0	0	0	404	1638	244	2.21	-0.18	0.96	0.88
hSQ012011	NM_001003962	CAPNS1	826	2.87	0	0	0.17	2.18	-0.9	52.46	100	1.33	0.92	-1.55	14.69	36.42	0.95	0.92	-0.27	108.64	100	6.94	6.71	2	1	1	0	0	2	2	2	0	0	0	0	0	0	0	513	807	154	2.01	-0.41	0.96	0.97
hSQ036644	NM_002582	PARN	5073	2.87	0	0	-0.61	1.37	-0.33	92.38	100	0.44	0.29	-0.9	19.17	48.2	0.9	0.87	-0.74	108.64	100	7.47	6.94	0	1	0	0	0	1	1	1	0	0	0	0	0	0	0	1015	1920	57	1.99	-0.15	0.97	0.93
hSQ035077	NM_003074	SMARCC1	6599	2.86	0	0	-0.18	1.85	0.08	90.93	100	1.34	1.4	-1.23	14.69	42.15	0.96	0.93	-1.06	85.33	100	10.53	9.65	3	2	1	1	0	1	1	0	0	0	0	0	0	0	0	2312	3304	119	2.03	0.05	0.97	0.92
hSQ025398	NM_014021	SSX2IP	117178	2.86	0	0	0.11	2.72	-0.34	92.38	100	0.77	0.64	-0.11	21.69	59.14	0.91	0.9	0.06	108.17	100	5.68	5.71	0	1	0	0	0	2	2	2	0	0	0	0	0	0	0	3517	1845	266	2.62	-0.13	1	1.01
hSQ025130	NM_013322	SNX10	29887	2.85	0	0	0.97	3.74	-0.71	84.11	100	-1.38	-1.85	1.15	26.68	55.37	0.75	0.88	0.55	108.17	100	3.39	3.85	0	1	0	0	0	1	0	0	1	0	0	0	0	0	0	1745	606	215	2.77	-0.47	1.17	1.14
hSQ022121	NM_014634	PPM1F	9647	2.85	0	0	0.8	3.33	-1.45	13.85	59.43	1.8	0.91	-1.73	14.69	33.51	0.92	0.8	-1.03	108.17	100	5.59	4.79	4	4	1	2	1	0	0	0	0	0	0	0	0	0	0	3672	1365	114	2.53	-0.9	0.87	0.86
hSQ024007	NM_052940	LRRC42	115353	2.85	0	0	1.76	3.78	-0.79	65.69	100	0.7	0.35	-1.18	14.69	43.07	0.94	0.91	0.26	108.17	100	7.2	7.34	0	0	0	0	0	1	1	1	0	0	0	0	0	0	0	227	1287	200	2.02	-0.35	0.97	1.02
hSQ018391	NM_017829	CECR5	27440	2.85	0	0	0.23	2.21	-0.51	92.38	100	2.34	2.06	-1.5	14.69	37.39	0.98	0.95	0.82	108.17	100	5.73	6.25	1	2	1	0	0	0	1	0	0	0	NA	NA	NA	NA	NA	500	1182	NA	1.98	-0.28	0.96	1.09
hSQ001229	NM_014953	DIS3	22894	2.85	0	0	-0.43	1.82	-1.67	9.09	43.3	1.92	1.12	0.72	29.81	59.78	0.87	0.89	-0.75	108.64	100	7.25	6.94	4	2	2	1	0	1	0	0	0	0	NA	NA	NA	NA	NA	4392	2877	NA	2.26	-0.8	1.02	0.96
hSQ003334	NM_138410	CMTM7	112616	2.85	0	0	1.89	4.31	-0.53	92.38	100	2.05	1.8	0.13	29.81	60.66	0.87	0.88	0.68	108.17	100	4.11	4.41	3	2	1	1	1	1	0	0	0	0	0	0	0	0	0	587	528	236	2.42	-0.26	1.01	1.07
hSQ035164	NM_002128	HMGB1	3146	2.85	0	0	-0.72	1.45	0.14	90.93	100	2.44	2.53	-1.34	14.69	40.12	0.98	0.95	0.38	108.17	100	8.77	9.28	0	0	0	0	0	0	0	0	0	0	0	1	0	0	0	2613	648	163	2.17	0.09	0.97	1.06
hSQ012187	NM_003463	PTP4A1	7803	2.84	0	0	0.29	2.59	-0.2	92.38	100	-1.12	-1.21	-1.82	14.69	31.99	0.91	0.86	-0.2	108.64	100	4.01	3.83	3	2	0	0	0	0	0	0	0	0	0	0	0	0	0	3409	522	1150	2.29	-0.09	0.95	0.96
hSQ039131	NM_001013438	FXR1	8087	2.84	0	0	-1.05	1.29	-2.23	3.76	13.92	0.57	-0.34	-0.64	21.69	52.59	0.78	0.74	-1.63	37.98	76.82	7.7	6.37	1	1	1	0	0	0	0	0	0	0	NA	NA	NA	NA	NA	1022	1620	NA	2.34	-0.91	0.95	0.83
hSQ032288	NA	DISP1	84976	2.84	0	0	2.54	5.23	-1.68	9.09	42.69	0.38	-0.6	-1.75	14.69	33.07	0.79	0.71	-1.6	37.98	78.32	6.17	5.14	NA	NA	NA	NA	NA	NA	NA	NA	NA	NA	NA	NA	NA	NA	NA	NA	NA	NA	2.69	-0.98	0.89	0.83
hSQ012638	NM_001031679	MSRB3	253827	2.83	0	0	0.67	3.06	-0.3	92.38	100	-0.64	-0.76	0.89	28.63	58.34	0.82	0.89	0.21	108.17	100	3.35	3.46	1	1	0	1	0	2	1	1	0	0	0	0	0	0	0	3578	558	209	2.39	-0.12	1.08	1.03
hSQ007950	NM_000755	CRAT	1384	2.82	0	0	0.52	2.75	-1	43.3	93.94	-0.44	-0.95	0.44	29.81	60.99	0.81	0.84	-0.22	108.64	100	5.47	5.31	1	2	1	0	0	1	2	0	0	0	1	1	1	0	0	601	1881	295	2.24	-0.51	1.03	0.97
hSQ015129	NM_153369	KIAA1919	91749	2.82	0	0	-0.14	1.74	0.44	84.11	94.89	0.69	0.89	-0.13	21.69	58.98	0.88	0.87	-0.57	108.64	100	6.09	5.72	0	0	0	0	0	3	3	2	0	0	0	1	0	0	0	1939	1557	422	1.89	0.2	1	0.94
hSQ025152	NM_183075	CYP2U1	113612	2.81	0	0	1.31	3.25	-1.94	5.14	26.59	0.17	-0.76	-2.96	14.69	19.18	0.92	0.86	-0.61	108.64	100	4.56	4.27	4	2	1	3	0	0	1	0	0	0	0	0	0	0	0	3032	1635	83	1.93	-0.93	0.94	0.94
hSQ015858	NM_002895	RBL1	5933	2.81	0	0	0.25	2.23	-1.6	9.09	47.98	0.56	-0.26	-1.67	14.69	34.5	0.9	0.85	-2.3	34.95	44.18	6.72	5.51	2	2	2	0	0	1	1	1	0	0	0	0	0	0	0	983	3207	79	1.97	-0.82	0.95	0.82
hSQ027104	NM_014365	HSPB8	26353	2.8	0	0	2.27	4.35	-2.36	2.6	10.03	0.55	-0.82	-1.87	14.69	31.22	0.92	0.87	0.26	108.17	100	6.01	6.2	1	1	1	0	0	0	1	0	0	0	0	0	0	0	0	887	591	523	2.08	-1.36	0.96	1.03
hSQ032032	NM_032497	ZNF559	84527	2.78	0	0	0.31	2.26	0.2	90.93	100	0.08	0.18	-0.39	21.69	56.18	0.81	0.8	-0.57	108.64	100	4.58	4.24	1	0	0	1	0	2	0	0	2	0	2	1	1	0	0	775	1617	648	1.95	0.1	0.99	0.93
hSQ042709	NA	NBPF1	55672	2.78	0	0	-0.3	2.74	-1.25	25.69	75.68	-0.24	-0.98	0.36	29.81	61.07	0.85	0.88	-0.65	108.64	100	4.58	4	NA	NA	NA	NA	NA	NA	NA	NA	NA	NA	NA	NA	NA	NA	NA	NA	NA	NA	3.04	-0.74	1.03	0.87
hSQ041328	NM_138440	VASN	114990	2.78	0	0	0.78	3.28	-0.45	92.38	100	-4.28	-4.53	1.66	22.99	47.35	0.74	0.83	-0.05	108.64	100	7.75	7.72	0	1	0	0	0	2	1	1	0	0	0	0	0	0	0	629	2022	155	2.5	-0.25	1.11	1
hSQ027331	NM_001035534	FAM129B	64855	2.78	0	0	0.98	3.72	-1.58	11.29	49.56	-1.81	-2.58	-3.84	9.63	15.62	0.94	0.87	-0.38	108.64	100	6.69	6.22	2	3	2	0	0	0	0	0	0	0	0	0	0	0	0	1505	2202	52	2.74	-0.76	0.93	0.93
hSQ005843	NA	LOC25845	25845	2.78	0	0	3.11	5.27	-2.87	1.97	1.69	0.31	-0.98	-0.94	14.69	47.43	0.7	0.63	0.09	108.17	100	3.18	3.22	NA	NA	NA	NA	NA	NA	NA	NA	NA	NA	NA	NA	NA	NA	NA	NA	NA	NA	2.16	-1.29	0.89	1.01
hSQ008623	NM_015690	STK36	27148	2.77	0	0	-0.19	1.82	-1.22	25.69	77.57	-0.14	-0.68	-1.78	14.69	32.64	0.84	0.8	-2.15	34.95	50.2	5.36	4.16	2	2	1	1	0	4	2	0	0	0	0	0	0	0	0	704	3948	219	2.01	-0.53	0.95	0.78
hSQ003301	NM_032264	NBPF3	84224	2.77	0	0	-0.73	2.6	-1.39	15.82	64.34	0.39	-0.61	0.42	29.81	61.02	0.79	0.82	-0.35	108.64	100	3.93	3.66	1	1	1	0	0	1	1	1	0	0	0	0	0	0	0	1513	1902	350	3.33	-1	1.03	0.93
hSQ038488	NM_001042440	CAST	831	2.76	0	0	-2.41	-0.4	-2.08	4.63	20.07	-0.58	-1.57	-0.55	21.69	53.91	0.88	0.85	-1.54	44.12	81.9	5.95	5.18	2	1	0	0	0	1	0	0	0	0	0	0	0	0	0	2063	2253	186	2.01	-0.99	0.97	0.87
hSQ034817	NM_001654	ARAF	369	2.76	0	0	1.1	4.15	-1.85	5.84	32.06	0.48	-0.7	-2.45	14.69	23.58	0.86	0.76	-1.34	56.69	92.85	4.63	3.95	1	2	1	0	0	3	2	1	3	1	0	0	0	0	0	464	1821	132	3.05	-1.18	0.88	0.85
hSQ018372	NM_022075	LASS2	29956	2.76	0	0	0.9	3.29	-3.29	1.6	0.2	1.24	-0.19	-9.56	0	15.85	0.85	0.7	-1.84	34.95	65.19	6.2	5.1	4	1	1	1	1	2	0	0	0	0	0	0	0	0	0	974	1143	347	2.39	-1.43	0.82	0.82
hSQ034352	NM_001001419	SMAD5	4090	2.75	0	0	0.37	2.46	-2.48	2.12	6.92	0.45	-0.5	-0.79	19.17	50.13	0.91	0.87	-1.18	71.06	100	6.19	5.36	3	4	3	0	0	0	1	0	0	0	0	0	0	0	0	5254	1397	444	2.09	-0.95	0.95	0.87
hSQ013152	NM_005030	PLK1	5347	2.75	0	0	0.95	2.88	0.01	90.93	100	0.79	0.8	-0.22	21.69	58.09	0.92	0.91	0.6	108.17	100	7.62	7.97	0	0	0	0	0	0	1	0	0	0	0	0	0	0	0	305	1812	53	1.93	0	0.99	1.05
hSQ010026	NM_018943	TUBA8	51807	2.75	0	0	-0.99	1.01	0.3	84.11	100	0.82	0.96	1.93	21.91	42.29	0.69	0.79	0.18	108.17	100	8.26	8.39	1	1	0	1	0	0	0	0	0	0	0	0	0	0	0	595	1350	73	2	0.13	1.14	1.02
hSQ010008	NA	LOC441371	441371	2.75	0	0	-1.06	1.31	0.34	84.11	98.58	0.8	0.97	-0.04	21.69	59.73	0.61	0.6	-0.55	108.64	100	5.17	4.76	NA	NA	NA	NA	NA	NA	NA	NA	NA	NA	NA	NA	NA	NA	NA	NA	NA	NA	2.37	0.17	0.99	0.92
hSQ019565	NM_005776	CNIH	10175	2.74	0	0	0.1	2.45	-0.04	92.38	100	1.75	1.73	1.16	26.68	55.27	0.87	0.9	0.09	108.17	100	4.04	4.11	0	0	0	0	0	0	0	0	0	0	0	0	0	0	0	885	435	103	2.35	-0.02	1.03	1.02
hSQ037595	NM_003909	CPNE3	8895	2.74	0	0	1	3.28	-1.22	25.69	77.28	0.71	0.09	-0.62	21.69	52.88	0.93	0.91	-1.44	51.15	87.5	11.39	9.47	3	4	2	1	1	1	1	1	0	0	0	0	0	0	0	3088	1614	146	2.28	-0.62	0.98	0.83
hSQ036170	NM_019050	USP53	54532	2.74	0	0	-0.46	1.96	-0.31	92.38	100	0.29	0.1	-0.3	21.69	57.23	0.91	0.89	-0.1	108.64	100	4.91	4.84	0	1	0	0	0	2	1	1	0	0	0	0	0	0	0	2307	3222	1066	2.42	-0.19	0.98	0.98
hSQ029580	NM_175063	C19orf63	284361	2.73	0	0	1.34	3.49	-1.05	35.24	90.59	2.99	2.47	-2.04	14.69	28.69	1	0.95	-0.27	108.64	100	6.2	5.96	3	1	1	0	0	0	0	0	0	0	0	0	0	0	0	1202	765	66	2.14	-0.52	0.96	0.96
hSQ008785	NM_025188	TRIM45	80263	2.73	0	0	0.85	3.73	-0.55	92.38	100	-0.08	-0.35	-0.47	21.69	55.06	0.68	0.59	-1.95	34.95	59.16	4.21	2.9	4	5	4	1	1	1	0	0	0	0	0	0	0	0	0	1237	1743	588	2.88	-0.27	0.86	0.69
hSQ028787	NA	SBNO1	55206	2.73	0	0	-1.31	0.65	0.47	84.11	93.5	-1.03	-0.75	0.24	29.81	60.98	0.83	0.85	-0.03	108.64	100	6.63	6.61	NA	NA	NA	NA	NA	NA	NA	NA	NA	NA	NA	NA	NA	NA	NA	NA	NA	NA	1.97	0.28	1.02	1
hSQ033368	NM_001001671	MAP3K15	389840	2.72	0	0	0.18	2.91	-1.86	5.84	31.24	1.96	1.18	0.13	29.81	60.67	0.8	0.8	-0.85	108.64	100	4.44	3.86	1	1	1	0	0	1	1	0	0	0	1	1	0	0	0	693	2367	1637	2.73	-0.78	1.01	0.87
hSQ030546	NM_031307	PUS3	83480	2.72	0	0	-1.22	0.88	-1.96	5.14	25.49	1.29	0.33	0.74	29.81	59.62	0.64	0.69	-1.73	34.95	71.18	6.22	5.27	1	1	1	0	0	3	2	2	0	0	0	0	0	0	0	299	1446	87	2.1	-0.96	1.09	0.85
hSQ024758	NM_032808	LINGO1	84894	2.72	0	0	1.14	3.19	-0.88	58.83	100	1.61	1.1	1.32	25.16	52.87	0.8	0.85	0.03	108.17	100	3.97	3.99	0	0	0	0	0	2	1	1	0	0	0	0	0	0	0	1017	1863	52	2.05	-0.5	1.06	1.01
hSQ023220	NM_001077204	CSPP1	79848	2.71	0	0	-0.74	1.76	-0.64	91.61	100	0.2	-0.04	-0.36	21.69	56.57	0.86	0.85	-0.47	108.64	100	4.33	4.06	1	1	1	0	0	0	0	0	0	0	NA	NA	NA	NA	NA	666	3771	NA	2.51	-0.24	0.98	0.94
hSQ002727	NM_001449	FHL1	2273	2.71	0	0	-1.39	0.41	-0.63	91.61	100	2.64	2.29	-1.68	14.69	34.19	0.88	0.83	-0.06	108.64	100	6.29	6.23	0	0	0	0	0	1	1	1	0	0	0	0	0	0	0	1324	843	208	1.8	-0.36	0.95	0.99
hSQ018837	NM_018719	CDCA7L	55536	2.7	0	0	-0.44	1.61	-1.1	35.24	86.85	0.05	-0.58	-1.96	14.69	29.89	0.88	0.81	-1.84	34.95	64.86	6.21	5.24	1	2	1	1	1	0	0	0	0	0	0	0	0	0	0	1420	1365	84	2.06	-0.64	0.92	0.84
hSQ013541	NM_032435	KIAA1804	84451	2.7	0	0	0.65	2.79	-1.6	9.09	48.32	2.4	1.63	-1.27	14.69	41.39	0.69	0.57	-1.92	34.95	60.62	3.76	2.92	3	1	1	1	1	2	4	1	1	0	0	0	0	0	0	2437	3111	261	2.13	-0.77	0.82	0.78
hSQ000160	NM_173638	NBPF15	284565	2.7	0	0	0.43	2.98	0.07	90.93	100	0.47	0.52	-1.62	14.69	35.23	0.9	0.83	-0.75	108.64	100	4.86	4.34	1	1	1	0	0	1	1	1	0	0	0	0	0	0	0	1517	2013	489	2.55	0.06	0.92	0.89
hSQ032735	NM_199320	PHF17	79960	2.69	0	0	-0.85	1.56	-1.28	21.42	72.79	-0.06	-0.63	-2.13	14.69	27.46	0.97	0.88	-1	108.61	100	5.68	4.87	2	2	1	1	0	1	3	1	0	0	0	1	0	0	0	2961	2529	280	2.41	-0.57	0.91	0.86
hSQ002092	NM_006111	ACAA2	10449	2.68	0	0	-1.66	0.64	-2.32	3.76	11.07	0.41	-0.81	-0.67	21.69	52.13	0.86	0.82	0.36	108.17	100	5.13	5.39	2	0	0	2	0	1	0	0	0	0	NA	NA	NA	NA	NA	342	1194	NA	2.3	-1.22	0.95	1.05
hSQ020166	NM_001359	DECR1	1666	2.68	0	0	-1.32	0.75	0.13	90.93	100	-0.96	-0.9	-1.45	14.69	38.26	0.95	0.91	-0.83	108.64	100	6.68	6.13	0	0	0	0	0	1	1	1	0	0	0	0	0	0	0	102	1008	141	2.07	0.06	0.95	0.92
hSQ022543	NM_003060	SLC22A5	6584	2.67	0	0	0.51	2.68	-2.83	1.97	2.02	1.18	-0.08	-2.12	14.69	27.57	0.86	0.81	-2.61	28.06	35.84	5.63	4.55	1	1	1	0	0	2	2	1	0	0	0	0	0	0	0	1339	1674	221	2.17	-1.27	0.94	0.81
hSQ029987	NM_145204	SENP8	123228	2.67	0	0	-0.02	1.64	-0.44	92.38	100	1.17	0.97	0.75	29.81	59.51	0.53	0.62	-0.43	108.64	100	5.42	5.17	0	1	0	0	0	0	0	0	0	0	0	1	0	0	0	700	639	99	1.66	-0.2	1.18	0.95
hSQ014234	NM_012463	ATP6V0A2	23545	2.65	0	0	-0.9	0.98	-0.11	92.38	100	0.82	0.77	-2.57	14.69	22.39	0.91	0.87	-0.08	108.64	100	5.95	5.91	1	0	0	1	0	0	3	0	0	0	0	0	0	0	0	1859	2571	248	1.87	-0.05	0.95	0.99
hSQ026918	NM_005357	LIPE	3991	2.65	0	0	1.36	3.7	-1.14	30.1	84.05	1.36	0.88	-1.47	14.69	37.79	0.93	0.9	-0.5	108.64	100	6.64	6.26	3	1	1	1	1	1	1	0	0	0	1	0	0	1	0	297	3231	277	2.34	-0.48	0.97	0.94
hSQ026024	NM_012280	FTSJ1	24140	2.65	0	0	-0.86	0.9	-0.3	92.38	100	0.98	0.87	-4.29	9.63	14.97	0.92	0.85	0.18	108.17	100	5.33	5.42	0	0	0	0	0	1	1	1	0	0	0	0	0	0	0	638	990	323	1.76	-0.11	0.93	1.02
hSQ007445	NM_017546	C2orf29	55571	2.65	0	0	-0.63	1.18	-2.02	4.63	22.54	0.7	-0.17	-2.09	14.69	27.96	0.87	0.75	-1.59	37.98	78.94	6.61	5.69	1	1	1	0	0	0	0	0	0	0	NA	NA	NA	NA	NA	901	1533	NA	1.81	-0.87	0.86	0.86
hSQ044690	NA	LOC338598	338598	2.64	0	0	-1.12	1.55	-2.12	4.63	18.17	0.07	-1.16	0.12	29.81	60.62	0.73	0.74	0.13	108.17	100	3.12	3.22	NA	NA	NA	NA	NA	NA	NA	NA	NA	NA	NA	NA	NA	NA	NA	NA	NA	NA	2.67	-1.23	1.02	1.03
hSQ025342	NM_015920	RPS27L	51065	2.64	0	0	-0.37	2.28	-0.75	74.83	100	0.16	-0.22	-1.48	14.69	37.76	0.97	0.92	0.39	108.17	100	3.8	4.02	1	0	0	0	0	1	0	0	0	0	0	0	0	0	0	691	255	137	2.65	-0.38	0.95	1.06
hSQ029499	NM_153369	KIAA1919	91749	2.64	0	0	-0.14	2.19	-0.39	92.38	100	1.02	0.83	0.99	28.01	57.34	0.81	0.88	-0.12	108.64	100	5.62	5.54	0	0	0	0	0	3	3	2	0	0	0	1	0	0	0	1939	1557	422	2.33	-0.2	1.09	0.99
hSQ032225	NM_013276	CARKL	23729	2.63	0	0	1.38	4.06	-1.81	5.84	34.23	0.82	-0.07	-1.53	14.69	36.76	0.96	0.92	-0.94	108.64	100	7.36	6.56	2	2	2	1	1	2	1	1	0	0	0	0	0	0	0	2298	1437	103	2.68	-0.9	0.96	0.89
hSQ044118	NM_015254	KIF13B	23303	2.62	0	0	2.68	5.01	-2.12	4.63	17.99	-1.96	-2.96	0.58	29.81	60.56	0.79	0.81	-3.49	16.31	33.14	6.08	4.22	6	7	2	2	0	2	2	2	0	0	0	0	0	0	0	3226	5481	59	2.33	-0.99	1.03	0.69
hSQ022798	NM_003600	AURKA	6790	2.62	0	0	2.03	4.08	-0.25	92.38	100	1.19	1.06	-0.59	21.69	53.33	0.9	0.88	-1.44	48.64	87.39	9.09	8.4	1	1	1	1	1	0	0	0	0	0	1	0	0	0	0	769	1212	358	2.05	-0.13	0.98	0.92
hSQ001033	NA	LOC439982	439982	2.62	0	0	-1.32	0.59	-0.1	92.38	100	1.37	1.33	-0.41	21.69	55.86	0.95	0.93	0.01	108.17	100	3.88	3.89	NA	NA	NA	NA	NA	NA	NA	NA	NA	NA	NA	NA	NA	NA	NA	NA	NA	NA	1.91	-0.05	0.97	1
hSQ038410	NM_172240	WDR51B	282809	2.61	0	0	-0.08	1.92	-2.75	2.12	2.8	-0.13	-1.55	0.01	29.81	60.03	0.81	0.81	-0.18	108.64	100	4.54	4.43	2	1	1	0	0	1	0	0	0	0	0	0	0	0	0	1425	1437	105	2	-1.42	1	0.98
hSQ031435	NM_006435	IFITM2	10581	2.61	0	0	-0.98	0.79	-0.28	92.38	100	-0.82	-1	-2.77	14.69	20.57	0.96	0.9	-0.03	108.64	100	5.36	5.34	0	0	0	0	0	0	2	0	0	0	0	0	0	0	0	245	399	86	1.77	-0.19	0.94	1
hSQ029768	NM_182664	RASSF5	83593	2.6	0	0	1.41	3.53	-1.8	5.84	34.94	-1.88	-2.95	0.21	29.81	60.91	0.74	0.76	-0.98	108.61	100	3.57	2.97	4	5	2	0	0	1	1	0	0	0	0	0	0	0	0	2435	1011	57	2.12	-1.07	1.02	0.83
hSQ019749	NM_005697	SCAMP2	10066	2.6	0	0	1.17	4.1	-4.85	0	1.93	1.56	-0.43	-4.3	9.63	14.95	0.93	0.81	-0.79	108.64	100	5.84	5.47	2	1	1	1	1	1	1	1	0	0	0	0	0	0	0	227	990	74	2.93	-1.99	0.88	0.94
hSQ030654	NM_153686	LCORL	254251	2.6	0	0	-1.7	0.83	-0.99	43.3	94.27	0.45	-0.1	1.47	23.79	50.53	0.74	0.83	0.46	108.17	100	4.88	5.2	0	1	0	0	0	1	1	1	1	1	NA	NA	NA	NA	NA	2501	957	NA	2.52	-0.56	1.13	1.06
hSQ025794	NM_013388	PREB	10113	2.6	0	0	1.38	2.97	-0.7	84.11	100	1.04	0.69	-0.85	19.17	49.07	0.96	0.93	0.76	108.17	100	4.89	5.29	1	0	0	0	0	1	3	1	0	0	0	0	0	0	0	655	1254	253	1.59	-0.36	0.97	1.08
hSQ033165	NM_024098	CCDC86	79080	2.59	0	0	-0.68	1.34	-2.23	3.76	13.85	1.86	0.98	-1.64	14.69	35.01	0.94	0.9	-1.62	37.98	77.23	7.09	6.27	1	2	1	0	0	0	0	0	0	0	0	0	0	0	0	763	1083	169	2.02	-0.87	0.95	0.88
hSQ020734	NM_000373	UMPS	7372	2.59	0	0	0.63	2.38	-0.7	84.11	100	3.02	2.64	-1.85	14.69	31.49	0.97	0.93	-0.25	108.64	100	9.45	9.24	0	0	0	0	0	2	2	1	1	1	0	0	0	0	0	697	1443	106	1.75	-0.38	0.95	0.98
hSQ016171	NM_013401	RAB3IL1	5866	2.59	0	0	0.63	2.93	-0.91	52.46	99.39	-0.99	-1.56	-0.7	21.69	51.52	0.89	0.88	0.41	108.17	100	4.69	5.09	2	2	2	0	0	0	0	0	0	0	0	0	0	0	0	976	1149	158	2.3	-0.57	0.99	1.08
hSQ045157	NM_014752	SPCS2	9789	2.59	0	0	-0.25	2.07	-1.2	25.69	79.14	1.21	0.57	-2.82	14.69	20.16	0.94	0.89	-1.07	81.59	100	7.18	6.14	1	1	1	0	0	0	0	0	0	0	0	0	0	0	0	691	372	307	2.32	-0.64	0.95	0.86
hSQ011248	NM_014604	TAX1BP3	30851	2.59	0	0	0.74	2.53	-0.42	92.38	100	1.62	1.43	-1.49	14.69	37.53	0.95	0.92	-0.31	108.64	100	4.34	4.18	1	1	0	0	0	0	0	0	0	0	0	0	0	0	0	852	375	153	1.79	-0.2	0.96	0.96
hSQ042306	NM_014170	GTPBP8	29083	2.57	0	0	-1.76	0	-2.74	2.12	2.89	2.35	1.23	-2.32	14.69	25.11	0.91	0.82	-0.39	108.64	100	5.84	5.57	1	2	1	0	0	0	0	0	0	0	NA	NA	NA	NA	NA	454	855	NA	1.76	-1.12	0.9	0.95
hSQ014804	NM_181784	SPRED2	200734	2.57	0	0	-0.65	1.43	-0.48	92.38	100	-1.04	-1.31	-1.98	14.69	29.62	0.95	0.87	-1.21	71.06	98.81	4.56	3.9	0	1	0	0	0	1	0	0	0	0	0	0	0	0	0	2649	1257	189	2.08	-0.27	0.92	0.86
hSQ023379	NM_006467	POLR3G	10622	2.57	0	0	-1.91	-0.02	-3.1	1.6	0.51	1.9	-0.04	-2.67	14.69	21.44	0.93	0.76	-1.57	44.12	80.2	5.9	4.8	2	2	1	2	1	1	0	0	1	0	1	1	1	0	0	2411	672	200	1.89	-1.94	0.82	0.81
hSQ032493	NM_005526	HSF1	3297	2.56	0	0	-0.49	1.29	-0.59	91.91	100	0.48	0.15	0.72	29.81	59.79	0.83	0.87	0.19	108.17	100	4.18	4.26	1	0	0	0	0	0	1	0	0	0	0	0	0	0	0	392	1590	170	1.78	-0.34	1.05	1.02
hSQ025840	NM_001219	CALU	813	2.56	0	0	-0.77	1.25	-2.07	4.63	20.32	-0.88	-1.98	-2.76	14.69	20.68	0.94	0.86	-1.23	66.03	98.14	8.21	6.87	3	1	1	0	0	2	1	0	0	0	0	0	0	0	0	2306	948	62	2.02	-1.11	0.91	0.84
hSQ042590	NM_001839	CNN3	1266	2.56	0	0	0.27	2.72	-1.45	13.85	59.73	1.41	0.69	-1.17	14.69	43.31	0.97	0.94	-0.34	108.64	100	8.16	7.85	2	0	0	1	0	0	0	0	0	0	0	0	0	0	0	790	990	251	2.45	-0.72	0.97	0.96
hSQ036131	NM_022787	NMNAT1	64802	2.56	0	0	1.15	2.87	-1.82	5.84	33.32	0.05	-0.85	0.35	29.81	61.08	0.74	0.76	-1.27	66.03	96.11	5.92	4.98	2	4	2	1	1	0	0	0	0	0	0	0	0	0	0	2796	840	144	1.72	-0.89	1.03	0.84
hSQ038042	NM_133452	RAVER1	125950	2.56	0	0	0.9	3.5	-1.58	11.29	49.4	0.81	-0.04	-1.37	14.69	39.65	0.88	0.84	-0.87	108.64	100	7.21	6.45	2	1	1	1	0	0	0	0	0	0	0	0	0	0	0	1241	2271	80	2.59	-0.85	0.96	0.89
hSQ034421	NM_032508	TMEM185A	84548	2.56	0	0	-0.62	1.4	0.67	74.83	85.33	1.45	1.73	0.31	29.81	61.07	0.83	0.84	-0.22	108.64	100	2.96	2.83	2	0	0	0	0	1	1	0	1	0	0	0	0	0	0	1456	1053	311	2.02	0.28	1.01	0.95
hSQ007025	NM_001008392	CTDSPL	10217	2.56	0	0	-0.16	2.21	-2.42	2.6	8.4	-0.45	-1.58	-0.15	21.69	58.77	0.8	0.79	-0.22	108.64	100	3.79	3.66	3	3	1	2	0	0	1	0	0	0	NA	NA	NA	NA	NA	3601	831	NA	2.37	-1.13	0.99	0.97
hSQ002391	NA	RBMS1::C2orf12	5937::192137	2.55	0	0	-1.77	0.51	-2.12	4.63	18.03	-1	-2.2	-3.86	9.63	15.59	0.92	0.78	-0.93	108.64	100	5.52	4.86	NA	NA	NA	NA	NA	NA	NA	NA	NA	NA	NA	NA	NA	NA	NA	NA	NA	NA	2.28	-1.2	0.84	0.88
hSQ016057	NM_002293	LAMC1	3915	2.55	0	0	0.8	3.05	-2.85	1.97	1.85	-0.99	-2.43	-2.03	14.69	28.77	0.88	0.83	-5.98	0	38	7.97	4.86	4	3	3	1	0	1	1	0	0	0	1	0	0	0	0	2802	4830	257	2.26	-1.44	0.94	0.61
hSQ004550	NM_004635	MAPKAPK3	7867	2.55	0	0	-0.88	1	-1.12	30.1	85.11	1.37	0.88	-0.75	19.17	50.71	0.89	0.86	-0.16	108.64	100	4.49	4.4	2	2	0	0	0	1	1	1	0	0	0	0	0	0	0	1242	1149	109	1.88	-0.49	0.97	0.98
hSQ014233	NM_021253	TRIM39	56658	2.54	0	0	1.15	3.07	-0.18	92.38	100	0.02	-0.09	-0.4	21.69	56.05	0.81	0.8	-1.22	66.03	98.25	4.78	4.18	1	1	1	0	0	0	1	0	0	0	1	1	1	1	1	1469	1557	594	1.92	-0.11	0.99	0.87
hSQ004367	NM_023943	TMEM108	66000	2.54	0	0	0.38	2.79	-0.67	90.93	100	1.35	1.01	2.63	14.69	29.44	0.44	0.67	-1.01	108.17	100	4.21	3.79	0	0	0	0	0	2	1	1	0	0	0	0	0	0	0	225	1728	192	2.41	-0.34	1.51	0.9
hSQ032030	NM_001035260	VPS26A	9559	2.54	0	0	0.75	2.68	-0.73	74.83	100	1.92	1.56	0.4	29.81	61.05	0.87	0.88	-0.46	108.64	100	8.03	7.6	1	1	0	0	0	0	0	0	0	0	0	0	0	0	0	1674	756	126	1.93	-0.37	1.02	0.95
hSQ010862	NM_004926	ZFP36L1	677	2.53	0	0	0.18	2.32	-0.25	92.38	100	-3.15	-3.3	2.19	21.69	37.55	0.4	0.59	-1.62	37.98	77.09	5.36	4.25	2	1	1	0	0	1	1	0	0	0	0	0	0	0	0	1875	1017	130	2.14	-0.15	1.47	0.79
hSQ008622	NM_013232	PDCD6	10016	2.53	0	0	2.01	4.31	-2.21	4.63	14.8	1.24	0.15	-1.6	14.69	35.66	0.99	0.94	0.25	108.17	100	5.18	5.34	1	1	1	1	1	1	0	0	0	0	1	1	1	0	0	459	576	100	2.3	-1.1	0.96	1.03
hSQ030667	NM_005927	MFAP3	4238	2.53	0	0	-2.52	-0.81	-0.05	92.38	100	1.54	1.51	0.24	29.81	60.97	0.78	0.8	-1.27	66.03	96.19	6.6	5.98	0	0	0	0	0	2	1	0	0	0	0	0	0	0	0	1319	1089	476	1.71	-0.03	1.03	0.91
hSQ010664	NM_198256	E2F6	1876	2.53	0	0	1.72	3.89	-0.86	58.83	100	1.09	0.71	-4.91	9.63	14.37	0.9	0.84	-0.67	108.64	100	5.42	5.13	1	2	0	1	0	0	0	0	0	0	0	0	0	0	0	2101	846	292	2.16	-0.38	0.93	0.95
hSQ000263	NM_003205	TCF12	6938	2.53	0	0	0.28	1.94	-0.87	58.83	100	-1.32	-1.69	0.79	29.5	59.22	0.83	0.85	-0.41	108.64	100	5.72	5.48	1	1	0	0	0	2	1	0	1	0	0	0	0	0	0	2369	2049	294	1.66	-0.37	1.02	0.96
hSQ000764	NA	TTC17	55761	2.53	0	0	-1.18	1.09	-0.24	92.38	100	-0.73	-0.81	0.9	28.63	58.23	0.83	0.86	0.41	108.17	100	5.55	5.87	NA	NA	NA	NA	NA	NA	NA	NA	NA	NA	NA	NA	NA	NA	NA	NA	NA	NA	2.27	-0.09	1.03	1.06
hSQ017454	NA	PGPEP1::MGC10812	54858::83542	2.52	0	0	0.95	3.03	-1.14	30.1	83.84	-2.33	-2.88	0.28	29.81	61.04	0.86	0.88	0.31	108.17	100	3.1	3.3	NA	NA	NA	NA	NA	NA	NA	NA	NA	NA	NA	NA	NA	NA	NA	NA	NA	NA	2.08	-0.56	1.03	1.06
hSQ009672	NM_000018	ACADVL	37	2.52	0	0	-1.41	0.63	0.09	90.93	100	-1.46	-1.41	-1.73	14.69	33.43	0.87	0.8	-0.02	108.64	100	5.63	5.62	1	2	1	0	0	0	0	0	0	0	0	0	0	0	0	168	1968	151	2.04	0.05	0.92	1
hSQ034719	NM_018285	IMP3	55272	2.51	0	0	1.58	3.52	-0.43	92.38	100	2.07	1.83	-2.35	14.69	24.69	0.94	0.88	0.04	108.17	100	5.84	5.87	1	1	1	0	0	0	0	0	0	0	0	0	0	0	0	519	555	86	1.94	-0.25	0.93	1.01
hSQ044981	NM_018593	SLC16A10	117247	2.51	0	0	-1.79	0.17	0.26	90.93	100	2.48	2.61	-2.21	14.69	26.35	0.98	0.93	0.74	108.17	100	6.07	6.53	0	0	0	0	0	2	3	1	1	1	0	0	0	0	0	775	1548	147	1.96	0.13	0.95	1.08
hSQ006332	NM_003104	SORD	6652	2.5	0	0	-0.07	1.55	-1.02	43.3	92.38	0.58	0.12	-2.24	14.69	26.08	0.94	0.89	-0.59	108.64	100	7.35	7.01	2	2	2	1	1	0	0	0	0	0	0	0	0	0	0	1311	1074	141	1.62	-0.46	0.94	0.95
hSQ038942	NM_022075	LASS2	29956	2.5	0	0	-0.34	2.06	-3.14	1.6	0.42	0.97	-0.68	-1.84	14.69	31.74	0.82	0.67	-0.94	108.64	100	5.57	4.83	4	1	1	1	1	2	0	0	0	0	0	0	0	0	0	974	1143	347	2.4	-1.65	0.82	0.87
hSQ030378	NM_032458	PHF6	84295	2.5	0	0	1.21	3.95	-2.58	2.12	5.18	3.88	2.61	-1.77	14.69	32.82	0.97	0.92	-0.51	108.64	100	10.57	9.75	2	1	1	2	1	0	0	0	0	0	0	0	0	0	0	3461	1098	202	2.75	-1.26	0.95	0.92
hSQ045372	NM_014168	METTL5	29081	2.49	0	0	0.52	2.44	-0.27	92.38	100	2.32	2.17	-1.24	14.69	41.99	0.98	0.95	-0.57	108.64	100	5.21	4.91	0	0	0	0	0	0	0	0	0	0	1	1	1	0	0	60	630	246	1.92	-0.15	0.97	0.94
hSQ027675	NM_031439	SOX7	83595	2.48	0	0	2.39	4.53	-1.05	35.24	90.26	1.76	1.21	2.09	21.91	39.43	0.6	0.79	-0.43	108.64	100	5.31	4.94	1	1	1	0	0	0	0	0	0	0	0	0	0	0	0	1969	1167	79	2.14	-0.55	1.31	0.93
hSQ044404	NM_020850	RANBP10	57610	2.48	0	0	0.75	2.88	-0.61	91.91	100	-0.34	-0.67	-1.94	14.69	30.15	0.87	0.79	-1.97	34.95	58.33	5.82	4.76	5	2	1	1	1	1	1	0	0	0	0	0	0	0	0	3325	1863	116	2.13	-0.32	0.91	0.82
hSQ031813	NM_198256	E2F6	1876	2.48	0	0	-1.49	0.26	-0.78	65.69	100	0.87	0.52	-0.63	21.69	52.66	0.85	0.83	0.55	108.17	100	3.84	4.18	1	2	0	1	0	0	0	0	0	0	0	0	0	0	0	2101	846	292	1.75	-0.35	0.97	1.09
hSQ009572	NM_199320	PHF17	79960	2.48	0	0	1.86	4.2	-1.09	35.24	87.22	0.16	-0.45	-1.66	14.69	34.6	0.94	0.88	-0.93	108.64	100	6.15	5.55	2	2	1	1	0	1	3	1	0	0	0	1	0	0	0	2961	2529	280	2.34	-0.61	0.93	0.9
hSQ042495	NM_002263	KIFC1	3833	2.48	0	0	-0.86	0.85	-0.88	58.83	100	0.75	0.42	-0.57	21.69	53.68	0.9	0.86	-2.08	34.95	52.92	9.21	7.13	0	0	0	0	0	1	1	1	1	1	0	0	0	0	0	177	2022	158	1.71	-0.33	0.96	0.77
hSQ024788	NA	NBPF10	440673	2.47	0	0	-0.09	2.41	-0.42	92.38	100	-0.03	-0.23	-0.12	21.69	59.1	0.8	0.79	-0.15	108.64	100	3.96	3.84	NA	NA	NA	NA	NA	NA	NA	NA	NA	NA	NA	NA	NA	NA	NA	NA	NA	NA	2.5	-0.21	0.99	0.97
hSQ003044	NM_207306	KIAA0495	57212	2.47	0	0	0.83	2.58	-0.92	52.46	99.16	1.93	1.52	0.63	29.81	60.31	0.78	0.84	-0.56	108.64	100	2.95	2.66	4	1	1	0	0	0	0	0	0	0	1	1	0	1	0	4633	606	1119	1.75	-0.41	1.08	0.9
hSQ022496	NM_012296	GAB2	9846	2.47	0	0	-0.34	1.89	-1.16	30.1	82.61	-2.11	-2.64	-0.54	21.69	53.99	0.93	0.89	-0.93	108.64	100	4.81	4.39	3	4	2	1	1	0	0	0	0	0	0	0	0	0	0	3975	1917	160	2.23	-0.53	0.96	0.91
hSQ034724	NM_206855	QKI	9444	2.47	0	0	-0.01	2.1	-3.56	0	0.29	-0.83	-2.9	-0.77	19.17	50.46	0.91	0.86	-0.49	108.64	100	5.18	4.85	7	2	2	3	1	2	1	0	0	0	0	1	0	0	0	6392	960	551	2.11	-2.07	0.95	0.94
hSQ038846	NM_001039707	SDCCAG3	10807	2.47	0	0	-0.38	1.79	-0.14	92.38	100	0.42	0.36	-0.23	21.69	58.05	0.82	0.81	-0.45	108.64	100	3.61	3.32	2	3	1	0	0	0	0	0	0	0	0	0	0	0	0	865	1308	205	2.17	-0.06	0.99	0.92
hSQ031549	NM_001018159	NAE1	8883	2.46	0	0	-1.45	0.21	-0.11	92.38	100	1.92	1.87	-1.54	14.69	36.68	0.96	0.91	0.4	108.17	100	5.82	6.19	1	0	0	0	0	1	1	1	1	1	0	0	0	0	0	130	1587	193	1.65	-0.05	0.95	1.06
hSQ021112	NM_001039707	SDCCAG3	10807	2.46	0	0	-0.33	1.81	-0.18	92.38	100	0.45	0.37	-0.53	21.69	54.21	0.84	0.82	-0.52	108.64	100	3.62	3.32	2	3	1	0	0	0	0	0	0	0	0	0	0	0	0	865	1308	205	2.14	-0.08	0.98	0.92
hSQ045198	NM_014936	ENPP4	22875	2.46	0	0	-0.29	1.67	0.01	90.93	100	2.78	2.79	-0.56	21.69	53.73	0.84	0.81	0.63	108.17	100	5.46	5.89	3	1	0	1	0	0	0	0	0	0	NA	NA	NA	NA	NA	2901	1362	NA	1.96	0.01	0.96	1.08
hSQ021349	NM_001039535	C18orf24	220134	2.46	0	0	-1.42	0.5	0.5	84.11	92.42	0.54	0.74	0.12	29.81	60.59	0.86	0.87	-0.07	108.64	100	5.06	5.02	0	0	0	0	0	0	0	0	0	0	1	0	0	0	0	1921	768	229	1.92	0.2	1.01	0.99
hSQ027764	NM_052860	ZNF300	91975	2.46	0	0	-1.95	-0.34	-0.09	92.38	100	0.67	0.62	0.44	29.81	60.99	0.72	0.75	-0.41	108.64	100	3.53	3.34	0	1	0	0	0	0	0	0	0	0	0	0	0	0	0	1022	1815	267	1.62	-0.05	1.04	0.95
hSQ032915	NM_003437	ZNF136	7695	2.46	0	0	2.05	3.89	0.37	84.11	97.4	-2.26	-2.07	3.32	8.9	18.66	0.46	0.76	-0.3	108.64	100	5.68	5.53	1	1	1	0	0	0	0	0	0	0	1	0	0	0	0	1247	1623	100	1.85	0.19	1.63	0.97
hSQ024487	NM_001116	ADCY9	115	2.46	0	0	1.21	3.53	-1.02	43.3	92.25	-0.05	-0.69	-1.05	14.69	45.53	0.91	0.88	-0.8	108.64	100	5.68	5.24	1	2	1	0	0	2	2	1	0	0	0	0	0	0	0	3123	4062	539	2.32	-0.65	0.96	0.92
hSQ012533	NM_024044	GIYD2	79008	2.45	0	0	-0.34	1.48	-0.45	92.38	100	0.18	-0.03	-1.11	14.69	44.46	0.9	0.86	0.36	108.17	100	6.63	7.01	0	0	0	0	0	0	1	0	0	0	0	0	0	0	0	93	828	189	1.82	-0.2	0.96	1.06
hSQ035649	NM_005192	CDKN3	1033	2.45	0	0	-1.84	-0.02	-0.35	92.38	100	1.4	1.24	-1.15	14.69	43.58	0.94	0.88	0.2	108.17	100	3.71	3.82	0	0	0	0	0	1	0	0	1	0	0	0	0	0	0	136	639	61	1.82	-0.16	0.94	1.03
hSQ032989	NM_152660	FAM76A	199870	2.44	0	0	-0.12	1.81	-1.54	11.29	53.07	2.44	1.8	-1.97	14.69	29.67	0.88	0.82	0	108.17	100	4.19	4.19	1	1	1	0	0	0	0	0	0	0	0	1	0	0	0	1022	924	102	1.93	-0.64	0.94	1
hSQ010708	NM_005754	G3BP1	10146	2.44	0	0	0.35	2.52	-2.76	1.97	2.66	2.55	0.53	-4.23	9.63	15.03	0.96	0.9	-2.9	23.13	32.01	15.07	10.24	3	1	1	1	0	0	0	0	0	0	0	0	0	0	0	1261	1401	171	2.17	-2.02	0.93	0.68
hSQ014943	NM_005189	CBX2	84733	2.44	0	0	1.01	3.15	-0.94	52.46	97.75	0.55	-0.07	-1.84	14.69	31.63	0.93	0.83	-1.72	34.95	71.86	6.42	5.58	6	4	2	0	0	0	1	0	0	0	NA	NA	NA	NA	NA	2537	1599	NA	2.14	-0.62	0.89	0.87
hSQ038559	NM_001081491	NXF1	10482	2.44	0	0	-0.89	0.75	0	90.93	100	1.31	1.31	-1.58	14.69	36.02	0.88	0.8	-0.28	108.64	100	6.67	6.46	7	1	1	0	0	0	0	0	0	0	0	0	0	0	0	2940	1071	136	1.65	0	0.91	0.97
hSQ043510	NM_000391	TPP1	1200	2.44	0	0	2.05	4.45	-0.58	92.3	100	-1.13	-1.5	-0.47	21.69	55.12	0.8	0.79	-0.4	108.64	100	6.06	5.73	3	2	0	1	0	0	1	0	0	0	0	0	0	0	0	1780	1692	61	2.4	-0.37	0.98	0.95
hSQ036055	NM_032711	MAFG	4097	2.43	0	0	1	3.14	0.01	90.93	100	0.55	0.55	0.64	29.81	60.27	0.81	0.87	0.33	108.17	100	3.47	3.68	2	2	0	0	0	0	0	0	0	0	1	0	0	0	0	4358	490	211	2.14	0	1.07	1.06
hSQ011173	NA	NBPF1::NBPF10	55672::440673	2.43	0	0	0.12	2.47	-0.45	92.38	100	-0.01	-0.23	0.18	29.81	60.83	0.81	0.82	-0.55	108.64	100	4.16	3.74	NA	NA	NA	NA	NA	NA	NA	NA	NA	NA	NA	NA	NA	NA	NA	NA	NA	NA	2.35	-0.23	1.01	0.9
hSQ013150	NM_015044	GGA2	23062	2.43	0	0	-1.18	1.01	-1.48	13.85	57.21	1.48	0.69	-5.18	9.63	14.1	0.93	0.83	-1.11	81.59	100	5.94	5.23	3	3	2	1	1	1	0	0	1	0	0	0	0	0	0	3267	1842	76	2.19	-0.79	0.89	0.88
hSQ009149	NM_207312	LOC112714	112714	2.43	0	0	-0.95	0.86	-0.17	92.38	100	1.83	1.73	-0.3	21.69	57.28	0.85	0.84	-0.08	108.64	100	10.39	10.3	0	0	0	0	0	2	1	1	0	0	0	0	0	0	0	86	1353	101	1.81	-0.1	0.99	0.99
hSQ035817	NM_014961	RUFY3	22902	2.43	0	0	-0.56	1.55	0.08	90.93	100	-1.03	-0.99	-0.47	21.69	55.11	0.9	0.88	0.08	108.17	100	4.86	4.91	3	0	0	0	0	1	0	0	0	0	0	0	0	0	0	2258	1410	593	2.11	0.04	0.98	1.01
hSQ045502	NM_017875	SLC25A38	54977	2.42	0	0	1.12	3.12	-0.64	90.93	100	1.55	1.23	-0.65	21.69	52.37	0.84	0.82	-0.6	108.64	100	4.4	4.01	2	0	0	0	0	0	1	0	0	0	0	0	0	0	0	707	915	377	2	-0.31	0.98	0.91
hSQ035516	NM_005842	SPRY2	10253	2.42	0	0	0.14	2.06	-0.27	92.38	100	-2.25	-2.36	1.44	25.16	51.09	0.61	0.72	-0.4	108.64	100	3.7	3.53	1	0	0	1	0	3	1	1	1	0	0	0	0	0	0	779	948	381	1.92	-0.12	1.18	0.95
hSQ020287	NM_004592	SFRS8	6433	2.42	0	0	0.8	2.71	-0.22	92.38	100	1.26	1.18	-1.55	14.69	36.45	0.95	0.9	-0.57	108.64	100	7.37	6.95	0	0	0	0	0	0	1	0	0	0	0	0	0	0	0	249	2856	140	1.91	-0.08	0.95	0.94
hSQ027141	NM_031934	RAB34	83871	2.42	0	0	2.27	4.33	-2.75	2.12	2.8	0.84	-0.56	-3.76	9.63	15.8	0.94	0.85	-0.45	108.64	100	4.59	4.3	1	1	1	1	1	0	1	0	0	0	0	0	0	0	0	358	780	602	2.06	-1.41	0.9	0.94
hSQ041668	NM_018325	C9orf72	203228	2.41	0	0	-2.75	0.15	-1.56	11.29	50.99	0.28	-0.43	-1.78	14.69	32.67	0.9	0.85	0.2	108.17	100	4.11	4.22	2	1	1	1	0	2	0	0	0	0	0	1	0	0	0	1690	1446	92	2.9	-0.71	0.94	1.03
hSQ022764	NM_005499	UBA2	10054	2.41	0	0	-2.7	-0.49	-0.47	92.38	100	1.31	1.07	-0.34	21.69	56.75	0.95	0.94	0.71	108.17	100	7.09	7.89	2	0	0	0	0	1	2	1	0	0	0	0	0	0	0	671	1923	70	2.21	-0.25	0.99	1.11
hSQ021678	NM_004824	CDYL	9425	2.41	0	0	-2.17	-0.17	-0.35	92.38	100	-0.64	-0.8	-0.05	21.69	59.64	0.85	0.84	-0.16	108.64	100	5.25	5.19	1	0	0	0	0	0	3	0	0	0	0	0	0	0	0	1487	1797	131	1.99	-0.17	1	0.99
hSQ011339	NM_002859	PXN	5829	2.41	0	0	0.57	2.33	-0.03	92.38	100	-1.45	-1.47	-0.98	14.69	46.71	0.92	0.87	-0.57	108.64	100	5.36	5.01	2	1	0	0	0	1	1	1	0	0	0	0	0	0	0	1860	1674	77	1.76	-0.02	0.95	0.93
hSQ035854	NM_021205	RHOU	58480	2.4	0	0	-0.41	1.78	-0.63	91.61	100	0.58	0.23	-1.28	14.69	41.23	0.88	0.85	-0.14	108.64	100	4.81	4.73	4	2	1	1	1	1	1	0	0	0	0	0	0	0	0	2922	777	621	2.18	-0.35	0.97	0.98
hSQ001670	NM_012280	FTSJ1	24140	2.4	0	0	-0.81	1.09	0.06	90.93	100	0.14	0.16	-1.07	14.69	45.04	0.9	0.87	0.2	108.17	100	4.62	4.74	0	0	0	0	0	1	1	1	0	0	0	0	0	0	0	638	990	323	1.9	0.02	0.97	1.03
hSQ040069	NM_016647	C8orf55	51337	2.4	0	0	1.73	4.32	-1.53	11.29	53.28	0.57	-0.37	-1.25	14.69	41.83	0.9	0.84	0.16	108.17	100	4.25	4.39	2	3	0	1	0	0	0	0	0	0	0	0	0	0	0	1493	627	144	2.59	-0.94	0.93	1.03
hSQ030603	NM_032139	ANKRD27	84079	2.4	0	0	2.63	4.56	-1.91	5.14	28.3	0.36	-0.73	-2.07	14.69	28.28	0.91	0.85	-1.58	44.12	79.52	4.88	3.98	1	1	1	0	0	0	0	0	0	0	0	0	0	0	0	1144	3153	156	1.93	-1.09	0.93	0.82
hSQ000282	NM_001196	BID	637	2.4	0	0	0.97	2.81	-2.01	4.63	23.2	1.2	0.35	-1.23	14.69	42.17	0.91	0.87	0.04	108.17	100	4.01	4.04	1	1	1	0	0	0	0	0	0	0	0	0	0	0	0	1440	588	170	1.84	-0.85	0.96	1.01
hSQ022513	NM_019054	FAM35A	54537	2.4	0	0	0.56	2.76	-2.71	2.12	3.18	0.44	-0.81	0	29.81	60	0.8	0.8	-0.89	108.64	100	3.74	3.33	1	1	1	1	1	1	1	1	0	0	0	0	0	0	0	782	2508	114	2.2	-1.25	1	0.89
hSQ000086	NM_052936	ATG4A	115201	2.39	0	0	-1.33	0.37	-2.27	3.76	12.58	2.34	1.07	-1.84	14.69	31.61	0.94	0.87	0.28	108.17	100	4.47	4.7	0	1	0	0	0	0	0	0	0	0	0	0	0	0	0	953	1197	123	1.7	-1.27	0.93	1.05
hSQ036416	NM_019054	FAM35A	54537	2.39	0	0	3.68	5.78	-3.64	0	0.38	0.77	-0.7	-0.01	21.69	59.91	0.79	0.79	-0.88	108.64	100	3.73	3.24	1	1	1	1	1	1	1	1	0	0	0	0	0	0	0	782	2508	114	2.1	-1.47	1	0.87
hSQ022995	NM_032449	CC2D1B	200014	2.39	0	0	3.29	5.54	-2.38	2.6	9.45	-0.23	-1.46	-2.02	14.69	29.01	0.86	0.81	-1.56	44.12	80.7	5.68	4.43	2	2	2	0	0	2	2	1	0	0	0	0	0	0	0	2924	2577	138	2.25	-1.23	0.94	0.78
hSQ018935	NM_002635	SLC25A3	5250	2.39	0	0	-2.63	-0.66	0.09	90.93	100	2.04	2.1	0.05	29.81	60.29	0.48	0.48	-0.11	108.64	100	2.18	2.13	0	0	0	0	0	0	0	0	0	0	0	0	0	0	0	471	1086	120	1.97	0.06	1.01	0.98
hSQ042008	NM_001040202	PAQR3	152559	2.39	0	0	1.59	3.8	-1.57	11.29	50.3	1.7	1.05	2.9	9.63	24.92	0.77	0.87	0.65	108.17	100	3.02	3.4	2	2	0	0	0	0	0	0	0	0	0	0	0	0	0	2598	936	204	2.22	-0.64	1.13	1.13
hSQ002808	NM_152348	WDR81	124997	2.39	0	0	0.34	2.7	-0.3	92.38	100	-0.02	-0.2	-0.38	21.69	56.29	0.85	0.83	-0.4	108.64	100	5.56	5.23	2	1	1	0	0	0	1	0	0	0	0	0	0	0	0	899	2673	221	2.36	-0.17	0.98	0.94
hSQ005031	NM_000159	GCDH	2639	2.38	0	0	-0.94	0.66	-0.93	52.46	98.03	0.24	-0.23	-0.81	19.17	49.66	0.88	0.85	-0.3	108.64	100	6.56	6.35	1	1	1	1	1	0	0	0	0	0	0	0	0	0	0	427	1317	77	1.6	-0.47	0.97	0.97
hSQ045377	NM_000021	PSEN1	5663	2.38	0	0	-1.12	0.31	-0.75	74.83	100	0.6	0.27	-0.53	21.69	54.26	0.89	0.86	-0.32	108.64	100	6.8	6.6	1	1	0	0	0	1	1	1	1	1	0	0	0	0	0	1112	1404	248	1.43	-0.33	0.97	0.97
hSQ003573	NM_003016	SFRS2	6427	2.38	0	0	-0.41	2.16	-0.46	92.38	100	2.63	2.45	-0.98	14.69	46.7	0.92	0.88	0.12	108.17	100	9.82	9.94	2	1	0	0	0	0	0	0	0	0	0	0	0	0	0	2046	666	170	2.57	-0.18	0.96	1.01
hSQ031777	NM_001098801	C18orf19	125228	2.37	0	0	-1.42	0.23	-0.77	74.83	100	-1.28	-1.63	-1.55	14.69	36.52	0.89	0.85	0.52	108.17	100	4.62	4.95	1	1	1	1	1	1	0	0	0	0	0	0	0	0	0	3133	819	432	1.65	-0.35	0.95	1.07
hSQ021152	NM_000182	HADHA	3030	2.37	0	0	2.06	4.3	-1.25	25.69	74.94	-0.35	-1.14	0.13	29.81	60.65	0.8	0.81	-1.01	108.17	100	8.45	7.3	1	1	1	0	0	1	2	0	0	0	0	0	0	0	0	614	2292	130	2.24	-0.79	1.01	0.86
hSQ007606	NM_000075	CDK4	1019	2.37	0	0	-0.33	1.52	-1.93	5.14	27.08	2.02	0.96	-2.23	14.69	26.19	0.96	0.9	-0.82	108.64	100	5.7	5.14	2	0	0	1	0	1	1	0	0	0	0	0	0	0	0	303	912	226	1.85	-1.07	0.93	0.9
hSQ023271	NA	LOC440442	440442	2.37	0	0	-1.79	0.19	-1.21	25.69	78.08	1.43	0.7	-2.01	14.69	29.19	0.8	0.68	-0.02	108.64	100	2.97	2.96	NA	NA	NA	NA	NA	NA	NA	NA	NA	NA	NA	NA	NA	NA	NA	NA	NA	NA	1.98	-0.73	0.85	1
hSQ007641	NM_014235	UBL4A	8266	2.37	0	0	1.22	2.85	-0.78	65.69	100	2.78	2.33	-0.83	19.17	49.33	0.95	0.93	-0.13	108.64	100	4.37	4.29	1	1	1	0	0	0	0	0	0	0	NA	NA	NA	NA	NA	1822	474	NA	1.63	-0.45	0.98	0.98
hSQ013294	NM_001748	CAPN2	824	2.36	0	0	0.94	2.68	-0.21	92.38	100	-0.52	-0.63	-0.41	21.69	55.93	0.9	0.89	-0.3	108.64	100	5.77	5.56	2	0	0	1	0	2	2	1	0	0	0	0	0	0	0	1159	2103	142	1.74	-0.12	0.99	0.96
hSQ006259	NA	KRTCAP2	200185	2.36	0	0	1.04	2.81	0.22	90.93	100	1.69	1.85	-0.76	19.17	50.5	0.96	0.93	0.15	108.17	100	4	4.11	NA	NA	NA	NA	NA	NA	NA	NA	NA	NA	NA	NA	NA	NA	NA	NA	NA	NA	1.77	0.16	0.97	1.03
hSQ038155	NM_032575	GLIS2	84662	2.36	0	0	1.45	4.26	-1.58	11.29	49.44	-0.94	-1.68	1.41	25.16	51.51	0.55	0.69	-0.96	108.63	100	4.45	3.83	1	1	1	0	0	0	2	0	0	0	0	0	0	0	0	2073	1575	57	2.81	-0.74	1.26	0.86
hSQ024845	NM_145284	FAM122B	159090	2.35	0	0	0.28	2.23	-1.08	35.24	88.24	1.41	0.81	-0.57	21.69	53.69	0.88	0.84	0.12	108.17	100	3.78	3.87	6	2	1	2	0	0	0	0	0	0	0	1	0	0	0	2572	747	418	1.94	-0.6	0.95	1.02
hSQ022167	NA	LOC284581	284581	2.34	0	0	0.52	2.05	-0.11	92.38	100	0.34	0.29	4.03	5.86	10.88	0.38	0.75	0.48	108.17	100	2.53	2.77	NA	NA	NA	NA	NA	NA	NA	NA	NA	NA	NA	NA	NA	NA	NA	NA	NA	NA	1.53	-0.05	1.96	1.1
hSQ028939	NM_002835	PTPN12	5782	2.34	0	0	-1.09	0.96	-0.95	52.46	97.02	-1.79	-2.27	-0.57	21.69	53.6	0.73	0.69	-1.18	71.06	100	4.46	3.75	3	1	1	2	0	1	0	0	0	0	NA	NA	NA	NA	NA	789	2343	NA	2.05	-0.48	0.94	0.84
hSQ015828	NM_017728	TMEM104	54868	2.34	0	0	1.65	4.6	-2.63	2.12	4.23	0.82	-0.91	-1.64	14.69	34.95	0.88	0.82	-1.23	66.03	98.03	5.8	4.81	2	2	2	0	0	0	0	0	0	0	0	0	0	0	0	1792	1491	110	2.95	-1.73	0.93	0.83
hSQ006328	NM_004776	B4GALT5	9334	2.33	0	0	1.49	3.54	-2.32	3.76	11.03	0.1	-0.92	-0.28	21.69	57.43	0.84	0.83	-0.59	108.64	100	4.32	3.95	4	2	0	0	0	0	0	0	0	0	0	0	0	0	0	3364	1167	111	2.05	-1.02	0.98	0.92
hSQ037439	NM_007067	MYST2	11143	2.33	0	0	1.19	2.95	-0.97	43.3	95.76	1.32	0.9	-0.25	21.69	57.75	0.85	0.85	-0.84	108.64	100	8.22	7.67	1	2	1	0	0	0	1	0	0	0	0	0	0	0	0	1592	1836	126	1.76	-0.42	1	0.93
hSQ000651	NM_000021	PSEN1	5663	2.33	0	0	-1.43	0.33	-0.65	90.93	100	0.38	0.1	-1.94	14.69	30.16	0.9	0.83	-0.49	108.64	100	6.84	6.47	1	1	0	0	0	1	1	1	1	1	0	0	0	0	0	1112	1404	248	1.76	-0.28	0.92	0.95
hSQ011109	NM_018983	NOLA1	54433	2.33	0	0	-0.92	1.45	-1.44	13.85	60.26	2.82	2.17	-1.74	14.69	33.2	0.97	0.92	-0.44	108.64	100	7.56	6.88	0	1	0	0	0	1	1	1	1	1	0	0	0	0	0	304	654	307	2.37	-0.65	0.95	0.91
hSQ016678	NM_007144	PCGF2	7703	2.33	0	0	-0.11	1.81	-0.94	52.46	97.68	-0.07	-0.61	3.07	8.94	22.29	0.44	0.63	-0.7	108.64	100	4.44	4.03	1	2	1	0	0	0	1	0	0	0	0	0	0	0	0	1326	1035	243	1.92	-0.54	1.43	0.91
hSQ037317	NM_020452	ATP8B2	57198	2.33	0	0	-0.32	1.57	-1.42	13.85	61.69	1.7	1.13	-0.59	21.69	53.28	0.93	0.9	-1.54	44.12	81.83	4.83	3.78	1	2	0	0	0	4	3	2	0	0	NA	NA	NA	NA	NA	2185	3672	NA	1.89	-0.57	0.96	0.78
hSQ007683	NM_018062	FANCL	55120	2.32	0	0	-1.69	-0.12	0.14	90.93	100	1.25	1.32	-2.17	14.69	26.9	0.95	0.9	0.15	108.17	100	6.51	6.64	0	0	0	0	0	1	1	0	1	0	0	0	0	0	0	520	1128	66	1.58	0.07	0.95	1.02
hSQ044886	NM_000935	PLOD2	5352	2.32	0	0	-0.08	1.6	-1.09	35.24	87.1	-0.18	-0.71	-1.9	14.69	30.78	0.95	0.91	-0.6	108.64	100	7.83	7.34	0	0	0	0	0	0	0	0	0	0	0	1	0	0	0	1276	2214	506	1.67	-0.53	0.96	0.94
hSQ013107	NM_030630	C17orf28	283987	2.32	0	0	0.72	3.02	0.48	84.11	93	-1.77	-1.44	1.43	25.16	51.25	0.72	0.82	0.19	108.17	100	5.94	6.14	0	1	0	0	0	1	1	0	0	0	0	0	0	0	0	825	2367	65	2.31	0.32	1.14	1.03
hSQ024534	NM_013411	AK2	204	2.31	0	0	-0.64	0.96	-1.05	35.24	89.94	2.3	1.66	-4.42	9.63	14.84	0.97	0.88	-0.75	108.64	100	6.53	5.99	4	1	1	0	0	0	0	0	0	0	0	0	0	0	0	2844	699	63	1.6	-0.65	0.9	0.92
hSQ007045	NM_017755	NSUN2	54888	2.31	0	0	-0.14	1.47	-0.95	52.46	96.81	1.32	0.76	-1.87	14.69	31.13	0.98	0.93	-1.01	108.17	100	10.46	9.51	1	1	1	0	0	1	0	0	1	0	0	0	0	0	0	684	2304	65	1.62	-0.57	0.95	0.91
hSQ045287	NM_005156	ROD1	9991	2.31	0	0	-0.49	1.54	-2.77	1.97	2.57	-0.77	-1.94	-0.72	19.17	51.28	0.93	0.9	-0.99	108.61	100	5.62	4.63	4	2	2	1	1	1	0	0	0	0	0	0	0	0	0	5413	1659	155	2.03	-1.17	0.96	0.82
hSQ010394	NM_000671	ADH5	128	2.31	0	0	0.07	2	-0.91	52.46	99.47	0.06	-0.33	-1.55	14.69	36.43	0.93	0.89	-0.44	108.64	100	7.88	7.5	1	1	1	0	0	2	0	0	0	0	0	0	0	0	0	1436	1125	80	1.93	-0.38	0.96	0.95
hSQ020619	NM_031216	SEH1L	81929	2.31	0	0	0.39	2.75	-1.68	9.09	42.32	1.46	0.66	-1.16	14.69	43.46	0.93	0.91	-0.45	108.64	100	6.17	5.63	1	1	0	1	0	0	0	0	0	0	0	0	0	0	0	2282	1083	138	2.36	-0.8	0.97	0.91
hSQ004366	NM_016006	ABHD5	51099	2.31	0	0	1.62	4.59	-2.24	3.76	13.51	0.68	-0.51	-1.92	14.69	30.47	0.9	0.82	-0.73	108.64	100	4.25	3.82	1	1	1	0	0	1	1	1	0	0	0	0	0	0	0	267	1050	110	2.96	-1.19	0.92	0.9
hSQ007145	NM_014838	ZBED4	9889	2.31	0	0	-0.28	1.72	-0.35	92.38	100	-0.08	-0.24	-1.17	14.69	43.28	0.88	0.82	-1.23	66.03	98.17	5.57	4.93	3	1	1	1	1	1	0	0	0	0	0	0	0	0	0	2900	3516	470	2	-0.16	0.93	0.89
hSQ042953	NM_032711	MAFG	4097	2.3	0	0	1.1	3.19	-0.09	92.38	100	0.38	0.32	0.56	29.81	60.63	0.81	0.87	0.36	108.17	100	3.46	3.68	2	2	0	0	0	0	0	0	0	0	1	0	0	0	0	4358	490	211	2.09	-0.06	1.07	1.06
hSQ011143	NM_004529	MLLT3	4300	2.3	0	0	-1.06	0.77	-0.66	90.93	100	2.19	1.91	-0.05	21.69	59.63	0.8	0.79	-0.25	108.64	100	5.02	4.85	1	0	0	1	0	1	1	1	0	0	0	0	0	0	0	1473	1707	259	1.83	-0.28	1	0.97
hSQ014177	NM_015426	WDR51A	25886	2.3	0	0	0.3	1.96	-0.13	92.38	100	1.16	1.11	-0.68	21.69	51.93	0.86	0.84	0.1	108.17	100	4.98	5.05	1	0	0	0	0	1	0	0	0	0	NA	NA	NA	NA	NA	633	1224	NA	1.66	-0.06	0.97	1.01
hSQ017331	NM_175918	CRIPAK	285464	2.3	0	0	-0.56	1.43	-0.28	92.38	100	-1.58	-1.73	-2.39	14.69	24.23	0.94	0.89	-2.46	28.06	39.32	5.76	4.57	0	0	0	0	0	0	2	0	0	0	4	3	2	0	0	142	1341	2960	1.99	-0.14	0.95	0.79
hSQ014250	NM_183075	CYP2U1	113612	2.29	0	0	1.19	2.93	-2.84	1.97	1.88	-0.07	-1.24	-1.64	14.69	34.86	0.91	0.87	-0.38	108.64	100	4.44	4.22	4	2	1	3	0	0	1	0	0	0	0	0	0	0	0	3032	1635	83	1.74	-1.17	0.96	0.95
hSQ017728	NM_022821	ELOVL1	64834	2.29	0	0	-0.96	1.18	-4.25	0	1.34	1.12	-0.78	-4.12	9.63	15.17	0.94	0.74	-0.37	108.64	100	5.6	5.33	1	1	0	1	0	1	0	0	0	0	0	0	0	0	0	514	840	128	2.14	-1.9	0.79	0.95
hSQ012458	NM_003929	RAB7L1	8934	2.29	0	0	-1.54	0.11	-0.24	92.38	100	1.66	1.55	-0.12	21.69	59.04	0.84	0.84	-0.6	108.64	100	4.81	4.46	1	1	1	0	0	0	0	0	0	0	NA	NA	NA	NA	NA	1792	612	NA	1.65	-0.1	0.99	0.93
hSQ012692	NM_032178	SLC7A6OS	84138	2.29	0	0	1.03	2.69	0.04	90.93	100	-0.14	-0.12	2.53	14.69	31.23	0.47	0.6	-0.31	108.64	100	3.87	3.74	0	0	0	0	0	0	0	0	0	0	NA	NA	NA	NA	NA	658	930	NA	1.66	0.02	1.28	0.96
hSQ038735	NM_004523	KIF11	3832	2.29	0	0	-1.27	0.4	-0.42	92.38	100	0.93	0.78	-0.55	21.69	53.89	0.89	0.86	0.44	108.17	100	8.66	9.17	1	1	1	0	0	0	0	0	0	0	0	0	0	0	0	1597	3171	142	1.67	-0.15	0.97	1.06
hSQ030803	NA	C12orf47	51275	2.29	0	0	-1.02	0.44	-0.67	90.93	100	1.42	1.1	-0.23	21.69	58.06	0.77	0.76	-0.29	108.64	100	4.4	4.18	NA	NA	NA	NA	NA	NA	NA	NA	NA	NA	NA	NA	NA	NA	NA	NA	NA	NA	1.46	-0.32	0.98	0.95
hSQ042155	NA	C12orf47	51275	2.29	0	0	1.52	3.75	-0.76	74.83	100	1.63	1.29	-0.85	19.17	49.01	0.81	0.77	-1.1	81.59	100	4.97	4.24	NA	NA	NA	NA	NA	NA	NA	NA	NA	NA	NA	NA	NA	NA	NA	NA	NA	NA	2.23	-0.34	0.95	0.85
hSQ005393	NM_004390	CTSH	1512	2.29	0	0	-1.48	1.13	-1.3	21.42	71.2	0.35	-0.49	-2.68	14.69	21.36	0.92	0.87	-0.49	108.64	100	5.92	5.58	1	1	1	1	1	1	1	0	0	0	0	0	0	0	0	380	1008	97	2.61	-0.85	0.95	0.94
hSQ027826	NM_015044	GGA2	23062	2.28	0	0	-1.35	0.86	-1.76	7.95	37.35	1.05	0.15	-3.89	9.63	15.53	0.95	0.87	-0.71	108.64	100	6.18	5.74	3	3	2	1	1	1	0	0	1	0	0	0	0	0	0	3267	1842	76	2.21	-0.9	0.91	0.93
hSQ021804	NA	C14orf128	84837	2.28	0	0	0.56	2.28	0.79	74.83	79.8	0.6	0.95	1.88	22.31	43.39	0.28	0.5	-0.77	108.64	100	3.56	2.95	NA	NA	NA	NA	NA	NA	NA	NA	NA	NA	NA	NA	NA	NA	NA	NA	NA	NA	1.71	0.35	1.76	0.83
hSQ020770	NM_001080469	FBXO46	23403	2.27	0	0	2.38	4.66	-0.28	92.38	100	-0.2	-0.36	-0.31	21.69	57.15	0.83	0.81	-0.78	108.64	100	4.48	3.96	0	0	0	0	0	1	2	0	1	0	0	0	0	0	0	1055	1812	123	2.28	-0.16	0.98	0.88
hSQ018956	NA	UBE2SP2	440406	2.27	0	0	-0.47	1.22	0.21	90.93	100	1.83	1.94	1.11	26.68	55.81	0.74	0.82	1.1	85.33	100	4.12	4.72	NA	NA	NA	NA	NA	NA	NA	NA	NA	NA	NA	NA	NA	NA	NA	NA	NA	NA	1.69	0.11	1.11	1.15
hSQ018783	NM_181521	CMTM4	146223	2.27	0	0	-1.68	0.04	-1.88	5.14	29.76	-0.22	-1.09	-1.22	14.69	42.43	0.93	0.87	-0.08	108.64	100	3.23	3.19	5	3	2	2	0	0	0	0	0	0	0	0	0	0	0	7307	627	182	1.72	-0.87	0.93	0.99
hSQ000533	NM_005131	THOC1	9984	2.26	0	0	-0.07	1.56	0.01	90.93	100	0.97	0.97	-1.2	14.69	42.72	0.92	0.88	-1.08	81.59	100	7.34	6.75	0	0	0	0	0	0	0	0	0	0	NA	NA	NA	NA	NA	106	1974	NA	1.63	0	0.96	0.92
hSQ030794	NM_006858	TMED1	11018	2.26	0	0	-0.79	1.22	-3.16	1.6	0.38	1.69	0.52	-4.03	9.63	15.3	0.93	0.84	-0.58	108.64	100	4.94	4.48	1	1	1	1	1	0	0	0	0	0	0	0	0	0	0	555	684	116	2.01	-1.17	0.9	0.91
hSQ036169	NA	LOC283278	283278	2.26	0	0	1.21	2.9	-0.78	65.69	100	-0.06	-0.36	-0.09	21.69	59.35	0.82	0.81	-0.52	108.64	100	4.59	4.28	NA	NA	NA	NA	NA	NA	NA	NA	NA	NA	NA	NA	NA	NA	NA	NA	NA	NA	1.69	-0.31	0.99	0.93
hSQ035196	NM_014109	ATAD2	29028	2.26	0	0	-1.69	-0.18	0.09	90.93	100	-0.86	-0.82	-1.64	14.69	34.86	0.95	0.89	0.85	108.17	100	7.2	7.99	1	0	0	0	0	1	1	0	1	0	0	0	0	0	0	633	4173	90	1.52	0.04	0.94	1.11
hSQ011186	NM_183372	NBPF1::NBPF11	200030	2.26	0	0	0.28	2.64	-0.28	92.38	100	0.44	0.29	-0.51	21.69	54.5	0.86	0.84	-0.87	108.64	100	4.38	3.79	1	2	1	0	0	1	1	1	0	0	1	1	0	1	0	1850	2373	663	2.35	-0.15	0.97	0.86
hSQ008686	NM_001457	FLNB	2317	2.26	0	0	0.26	2.32	0	92.38	100	-1.58	-1.58	0.4	29.81	61.05	0.82	0.85	-0.17	108.64	100	4.85	4.66	2	0	0	0	0	2	7	1	1	1	0	0	0	0	0	1486	7809	165	2.06	0	1.04	0.96
hSQ032236	NM_021190	PTBP2	58155	2.25	0	0	-3.17	-1.5	0.65	74.83	86.17	1.48	1.73	0.48	29.81	60.91	0.63	0.71	0.71	108.17	100	5.74	6.21	2	2	2	1	1	0	0	0	0	0	NA	NA	NA	NA	NA	1385	1596	NA	1.67	0.25	1.11	1.08
hSQ018960	NM_001860	SLC31A2	1318	2.25	0	0	2.2	4.13	-0.72	84.11	100	1.39	1.04	-1.23	14.69	42.17	0.89	0.86	-0.34	108.64	100	4.22	4.05	2	1	1	1	1	0	0	0	0	0	0	0	0	0	0	1224	432	117	1.93	-0.35	0.96	0.96
hSQ026278	NM_002225	IVD	3712	2.25	0	0	-0.06	1.26	0.43	84.11	95.37	2.2	2.43	-1.78	14.69	32.62	0.94	0.89	0.67	108.17	100	5.94	6.24	0	0	0	0	0	0	0	0	0	0	0	0	0	0	0	601	1272	343	1.33	0.23	0.94	1.05
hSQ016338	NM_001101672	ZNF219	51222	2.25	0	0	0.96	2.81	-0.65	90.93	100	-0.45	-0.75	1.25	26.28	53.99	0.38	0.54	-0.16	108.64	100	3.8	3.68	1	1	1	1	1	0	0	0	0	0	1	0	0	0	0	490	2169	287	1.84	-0.3	1.42	0.97
hSQ011546	NM_030791	SGPP1	81537	2.24	0	0	-1.22	0.58	-1.31	21.42	70.52	-0.41	-1.05	-0.61	21.69	53.02	0.9	0.88	-0.72	108.64	100	5.95	5.45	1	2	1	0	0	0	0	0	0	0	0	0	0	0	0	1887	1326	94	1.8	-0.63	0.98	0.92
hSQ030837	NM_032793	MFSD2	84879	2.24	0	0	0.52	2.52	-0.42	92.38	100	1.03	0.86	-0.45	21.69	55.35	0.89	0.87	0.39	108.17	100	6.08	6.33	0	0	0	0	0	1	0	0	0	0	0	0	0	0	0	387	1593	155	1.99	-0.17	0.98	1.04
hSQ040659	NM_001609	ACADSB	36	2.24	0	0	2.06	3.73	-0.57	92.3	100	0.17	-0.1	-1.01	14.69	46.14	0.97	0.94	0.25	108.17	100	6.91	7.09	2	2	1	0	0	1	0	0	0	0	0	0	0	0	0	4524	1299	117	1.67	-0.27	0.97	1.03
hSQ012734	NM_207346	TSEN54	283989	2.23	0	0	0.89	2.47	-1	43.3	93.48	2.28	1.82	-1.82	14.69	32.04	0.93	0.89	-0.13	108.64	100	4.81	4.74	2	2	1	0	0	0	0	0	0	0	NA	NA	NA	NA	NA	327	1581	NA	1.59	-0.46	0.95	0.99
hSQ028327	NM_005964	MYH10	4628	2.23	0	0	0.51	1.94	-0.86	58.83	100	0.67	0.09	-1.52	14.69	36.99	0.93	0.9	-0.26	108.64	100	8.3	8.13	1	1	1	1	1	1	1	1	1	1	0	0	0	0	0	1591	5931	96	1.43	-0.58	0.97	0.98
hSQ012834	NM_033111	RP11-298P3.3	88523	2.23	0	0	-0.33	1.37	-0.07	92.38	100	1.24	1.21	0.93	28.01	57.93	0.75	0.81	0.21	108.17	100	4.58	4.69	0	0	0	0	0	2	0	0	1	0	NA	NA	NA	NA	NA	201	2259	NA	1.7	-0.03	1.08	1.03
hSQ023489	NM_015459	ATL3	25923	2.22	0	0	1.71	3.97	-3.17	1.6	0.36	-2.97	-4.59	-1.91	14.69	30.66	0.91	0.73	-4.94	0	44.73	6.36	3.41	1	1	1	0	0	1	1	1	0	0	0	0	0	0	0	354	1626	276	2.26	-1.62	0.8	0.54
hSQ023443	NM_006009	TUBA1A	7846	2.22	0	0	-0.98	0.74	0.14	90.93	100	1.74	1.84	-1.1	14.69	44.59	0.9	0.86	0.47	108.17	100	10.4	11.24	0	0	0	0	0	2	3	2	0	0	0	0	0	0	0	208	1356	99	1.71	0.1	0.96	1.08
hSQ024253	NM_032714	INF2	64423	2.22	0	0	0.89	2.88	-1.05	35.24	90.39	-2.27	-2.88	-0.06	21.69	59.57	0.84	0.84	0.07	108.17	100	6.03	6.08	0	0	0	0	0	0	0	0	0	0	0	0	0	0	0	846	705	128	1.99	-0.61	1	1.01
hSQ023010	NM_017724	LRRFIP2	9209	2.22	0	0	0.03	2.08	-0.69	84.11	100	0.47	0.09	-0.6	21.69	53.23	0.9	0.87	-1.02	108.17	100	5.7	5.03	1	1	1	0	0	0	0	0	0	0	0	0	0	0	0	843	1203	108	2.06	-0.38	0.97	0.88
hSQ008952	NM_031465	C12orf32	83695	2.21	0	0	-0.56	1.15	-0.45	92.38	100	1.04	0.84	0.91	28.63	58.12	0.75	0.86	-0.11	108.64	100	3.26	3.21	0	0	0	0	0	0	0	0	0	0	0	0	0	0	0	999	717	144	1.7	-0.2	1.15	0.99
hSQ041254	NM_005499	UBA2	10054	2.21	0	0	-2.41	-0.47	-0.24	92.38	100	1.32	1.2	-0.63	21.69	52.68	0.95	0.93	0	108.17	100	7.1	7.1	2	0	0	0	0	1	2	1	0	0	0	0	0	0	0	671	1923	70	1.94	-0.12	0.98	1
hSQ011965	NM_014033	METTL7A	25840	2.21	0	0	1.53	4.18	-0.75	74.83	100	-3.48	-3.95	-0.45	21.69	55.31	0.71	0.66	-0.88	108.64	100	6.61	5.85	0	2	0	0	0	0	0	0	0	0	1	0	0	1	0	2366	735	288	2.65	-0.47	0.93	0.89
hSQ014399	NM_001034853	RPGR	6103	2.2	0	0	-0.31	1.6	-1.47	13.85	58.28	1.44	0.68	-1.55	14.69	36.54	0.93	0.89	-1.31	59.85	94.06	5.27	4.52	1	0	0	0	0	0	0	0	0	0	0	0	0	0	0	1091	3459	168	1.91	-0.76	0.95	0.86
hSQ026930	NM_001421	ELF4	2000	2.2	0	0	1.83	4.25	-1.89	5.14	29.45	0.16	-0.79	0.1	29.81	60.54	0.75	0.76	0.57	108.17	100	4.8	5.08	1	3	1	0	0	1	0	0	0	0	0	0	0	0	0	1791	1992	376	2.42	-0.96	1.01	1.06
hSQ030356	NM_020410	ATP13A1	57130	2.2	0	0	-0.16	1.3	-0.38	92.38	100	0.42	0.2	0.37	29.81	61.07	0.77	0.79	0.35	108.17	100	5.68	5.93	0	0	0	0	0	1	5	1	0	0	NA	NA	NA	NA	NA	219	3261	NA	1.46	-0.22	1.03	1.04
hSQ017561	NM_003945	ATP6V0E1	8992	2.2	0	0	1.8	3.81	-4.27	0	1.38	1.23	-1.39	-5.63	8.9	13.62	0.98	0.76	-1.64	37.98	76.22	4.55	3.64	5	1	0	2	0	1	2	1	0	0	0	0	0	0	0	535	246	101	2.01	-2.62	0.77	0.8
hSQ045349	NM_014452	TNFRSF21	27242	2.19	0	0	1.57	3.48	-2.08	4.63	19.78	-1.13	-2.24	-2.16	14.69	27.08	0.88	0.79	-1.8	34.95	67.28	4.27	3.48	2	0	0	0	0	2	1	1	0	0	0	0	0	0	0	1232	1968	433	1.91	-1.11	0.9	0.82
hSQ039070	NM_003664	AP3B1	8546	2.19	0	0	0.88	3.13	-0.58	92.3	100	0.06	-0.18	2.21	21.69	37.06	0.76	0.84	0.66	108.17	100	8.07	8.61	1	1	0	0	0	0	1	0	0	0	0	0	0	0	0	575	3285	125	2.25	-0.25	1.12	1.07
hSQ015818	NM_003331	TYK2	7297	2.19	0	0	1.36	3.11	-0.24	92.38	100	-0.24	-0.35	-0.51	21.69	54.56	0.8	0.76	-0.7	108.64	100	4.92	4.45	1	1	1	1	1	2	3	0	0	0	0	1	0	0	0	301	3564	341	1.74	-0.11	0.95	0.9
hSQ026502	NA	RPL22L1::LOC440990	200916::440990	2.19	0	0	-0.81	0.77	0.16	90.93	100	2.33	2.41	0.72	29.81	59.79	0.58	0.66	-0.67	108.64	100	3.74	3.39	NA	NA	NA	NA	NA	NA	NA	NA	NA	NA	NA	NA	NA	NA	NA	NA	NA	NA	1.58	0.08	1.13	0.9
hSQ041811	NM_006343	MERTK	10461	2.18	0	0	-1.1	0.56	-0.23	92.38	100	-0.28	-0.38	-1.27	14.69	41.38	0.91	0.88	-1.45	48.64	87.11	6.94	6.22	0	0	0	0	0	3	0	0	1	0	0	0	0	0	0	504	3000	122	1.66	-0.1	0.96	0.9
hSQ035988	NM_012388	PLDN	26258	2.18	0	0	1.39	3.36	-1.62	9.09	47.19	0.39	-0.38	-1.56	14.69	36.34	0.93	0.89	-0.18	108.64	100	3.28	3.16	6	1	1	1	1	0	0	0	0	0	0	0	0	0	0	3196	519	225	1.97	-0.77	0.96	0.96
hSQ030564	NM_014283	C1orf9	51430	2.18	0	0	-0.16	1.52	-1.41	13.85	62.42	-0.38	-1.23	-2.69	14.69	21.28	0.94	0.87	-1.09	81.59	100	5.45	4.67	1	2	1	0	0	0	0	0	0	0	0	0	0	0	0	1572	3765	219	1.68	-0.85	0.92	0.86
hSQ004936	NM_005702	ERAL1	26284	2.18	0	0	-1.71	0.59	-0.6	91.91	100	1.03	0.77	-5.25	9.63	14.03	0.94	0.83	-0.05	108.64	100	5.46	5.43	1	0	0	1	0	1	1	1	1	1	NA	NA	NA	NA	NA	501	1314	NA	2.3	-0.26	0.88	0.99
hSQ029163	NM_004927	MRPL49	740	2.18	0	0	0.99	2.55	-0.38	92.38	100	1.56	1.38	-1.49	14.69	37.56	0.94	0.91	0.14	108.17	100	6.13	6.22	1	2	0	1	0	1	0	0	1	0	0	0	0	0	0	1497	501	91	1.56	-0.18	0.97	1.01
hSQ001958	NM_007353	GNA12	2768	2.17	0	0	3.47	5.01	-2.97	1.97	1.07	-0.49	-2.03	0.69	29.81	59.94	0.77	0.84	-0.4	108.64	100	2.98	2.81	3	5	1	0	0	0	0	0	0	0	0	1	0	0	0	3072	1146	164	1.54	-1.54	1.08	0.94
hSQ032438	NM_004529	MLLT3	4300	2.16	0	0	-0.03	1.75	-0.61	91.61	100	3.27	2.99	-0.89	19.17	48.32	0.84	0.83	-0.67	108.64	100	5.31	4.93	1	0	0	1	0	1	1	1	0	0	0	0	0	0	0	1473	1707	259	1.77	-0.28	0.98	0.93
hSQ000702	NM_002897	RBMS1	5937	2.16	0	0	0.42	2.36	-1.47	13.85	58.05	-1.01	-1.89	-2.37	14.69	24.44	0.94	0.85	-1.52	44.12	82.82	6.82	5.7	2	0	0	1	0	0	0	0	0	0	0	0	0	0	0	768	1212	431	1.94	-0.88	0.9	0.84
hSQ019199	NM_022451	NOC3L	64318	2.16	0	0	-0.11	2	-0.19	92.38	100	2.52	2.42	-1.05	14.69	45.54	0.95	0.92	0.64	108.17	100	9.1	9.69	1	0	0	0	0	2	1	1	0	0	0	0	0	0	0	945	2403	88	2.11	-0.1	0.96	1.06
hSQ041351	NM_032449	CC2D1B	200014	2.16	0	0	1.67	3.69	-2.58	2.12	5.03	0.07	-1.01	-1.78	14.69	32.62	0.84	0.8	-1.3	59.85	94.75	4.69	3.7	2	2	2	0	0	2	2	1	0	0	0	0	0	0	0	2924	2577	138	2.02	-1.08	0.95	0.79
hSQ003448	NM_017944	USP47	55031	2.15	0	0	1.75	3.28	-1.14	30.1	83.87	-1.06	-1.68	-1.51	14.69	37.16	0.89	0.87	-1.12	76.95	100	7.11	6.34	1	2	1	0	0	0	0	0	0	0	0	0	0	0	0	3148	3864	763	1.52	-0.62	0.97	0.89
hSQ045170	NM_007182	RASSF1	11186	2.15	0	0	-0.69	0.81	0.22	90.93	100	0.83	0.93	-0.41	21.69	55.91	0.66	0.63	-0.25	108.64	100	4.69	4.52	1	1	1	1	1	0	0	0	0	0	0	0	0	0	0	795	1023	131	1.5	0.09	0.95	0.96
hSQ045240	NM_001079520	DACT1	51339	2.15	0	0	2.17	3.59	-1.18	30.1	80.91	1.3	0.68	-1.15	14.69	43.66	0.88	0.84	-0.93	108.64	100	5.41	4.77	2	2	1	0	0	1	1	0	0	0	0	0	0	0	0	1184	2400	164	1.42	-0.62	0.96	0.88
hSQ009474	NM_032204	ASCC2	84164	2.15	0	0	0.33	2.46	-0.78	65.69	100	1.59	1.14	-0.17	21.69	58.64	0.87	0.87	-0.47	108.64	100	6.3	6	1	1	1	1	1	0	2	0	0	0	0	0	0	0	0	399	2274	105	2.13	-0.45	1	0.95
hSQ042818	NM_006020	ALKBH1	8846	2.14	0	0	1.76	3.34	-1.02	43.3	92.49	1.8	1.39	-0.42	21.69	55.75	0.89	0.87	-0.94	108.64	100	6.24	5.79	1	0	0	0	0	1	1	1	1	1	NA	NA	NA	NA	NA	1406	1170	NA	1.58	-0.41	0.99	0.93
hSQ016346	NM_022492	TTC31	64427	2.14	0	0	-0.21	1.15	-0.07	92.38	100	-0.08	-0.11	-0.92	14.69	47.79	0.79	0.74	-0.25	108.64	100	4.89	4.74	0	1	0	0	0	2	0	0	1	0	NA	NA	NA	NA	NA	1338	1560	NA	1.36	-0.03	0.93	0.97
hSQ019365	NM_017801	CMTM6	54918	2.13	0	0	-0.31	1.79	-0.62	91.61	100	0.5	0.25	-0.1	21.69	59.2	0.91	0.91	-0.2	108.64	100	3.54	3.41	0	1	0	0	0	1	1	1	0	0	0	0	0	0	0	2648	552	166	2.1	-0.25	1	0.96
hSQ027370	NM_014757	MAML1	9794	2.13	0	0	1.27	3.29	-1.12	30.1	85.12	0.95	0.38	-1.14	14.69	43.88	0.95	0.89	-1.19	71.06	99.62	5.6	4.75	1	1	1	0	0	3	0	0	0	0	0	0	0	0	0	2403	3051	263	2.01	-0.57	0.94	0.85
hSQ044270	NM_017905	TMCO3	55002	2.13	0	0	0.38	2.33	-1.43	13.85	61.32	-1.78	-2.46	1.54	23.79	49.41	0.77	0.84	0.16	108.17	100	3.76	3.86	2	2	1	0	0	2	0	0	0	0	0	0	0	0	0	653	2034	359	1.95	-0.68	1.08	1.03
hSQ030757	NM_175871	C19orf39	126074	2.13	0	0	-0.08	1.41	-0.25	92.38	100	1.51	1.38	-2.08	14.69	28.07	0.89	0.84	-0.23	108.64	100	5.63	5.47	1	1	0	1	0	1	0	0	1	0	NA	NA	NA	NA	NA	935	690	NA	1.49	-0.13	0.95	0.97
hSQ026329	NM_006887	ZFP36L2	678	2.12	0	0	0.43	2.57	-0.34	92.38	100	-1.57	-1.74	-0.83	19.17	49.3	0.77	0.71	-2.08	34.95	53.21	6.03	5.12	1	0	0	0	0	1	1	1	0	0	0	0	0	0	0	751	1485	291	2.14	-0.16	0.92	0.85
hSQ029214	NM_138386	NAF1	92345	2.12	0	0	-0.97	1.27	-0.59	91.91	100	2.04	1.66	1.03	27.27	56.88	0.84	0.91	0.05	108.17	100	7.87	7.93	0	0	0	0	0	1	0	0	0	0	0	0	0	0	0	224	1485	194	2.24	-0.39	1.08	1.01
hSQ040944	NM_001395	DUSP9	1852	2.12	0	0	1.8	3.14	-1.48	13.85	57.2	-0.37	-1.3	-2.54	14.69	22.68	0.97	0.92	-0.14	108.64	100	6.45	6.38	0	1	0	0	0	0	2	0	0	0	0	0	0	0	0	1016	1155	113	1.34	-0.93	0.95	0.99
hSQ026643	NM_024592	SRD5A3	79644	2.12	0	0	1.21	2.96	-0.12	92.38	100	1.59	1.52	-1.28	14.69	41.37	0.94	0.91	0.25	108.17	100	4.52	4.67	0	0	0	0	0	2	2	1	1	1	0	0	0	0	0	1220	957	95	1.75	-0.07	0.97	1.03
hSQ045144	NM_033083	EAF1	85403	2.12	0	0	1.46	3.31	-1.22	25.69	77.5	0.62	-0.07	-0.1	21.69	59.25	0.87	0.86	-0.64	108.64	100	6.09	5.28	3	2	1	0	0	0	0	0	0	0	0	0	0	0	0	3457	807	223	1.85	-0.69	0.99	0.87
hSQ011561	NM_001018089	NARG2	79664	2.11	0	0	-0.32	1.29	-0.92	52.46	99.12	-0.02	-0.43	-0.65	21.69	52.35	0.87	0.85	-0.17	108.64	100	4.6	4.51	3	4	1	0	0	1	0	0	1	0	0	0	0	0	0	4024	2538	486	1.61	-0.41	0.98	0.98
hSQ022049	NM_018075	TMEM16K	55129	2.11	0	0	0.88	2.48	-0.1	92.38	100	0.54	0.48	-0.48	21.69	54.98	0.89	0.88	-0.52	108.64	100	8.27	7.81	0	0	0	0	0	3	2	0	1	0	0	0	0	0	0	580	1983	171	1.6	-0.06	0.99	0.94
hSQ031365	NA	EST_AA885292	repname(hSQ031365)	2.11	0	0	0.53	2.39	-1.52	11.29	54.02	-0.9	-1.71	-0.3	21.69	57.18	0.93	0.91	-0.19	108.64	100	4.55	4.39	NA	NA	NA	NA	NA	NA	NA	NA	NA	NA	NA	NA	NA	NA	NA	NA	NA	NA	1.86	-0.82	0.98	0.97
hSQ021145	NM_020796	SEMA6A	57556	2.11	0	0	-1.04	0.49	-0.54	92.38	100	-0.92	-1.17	-2.86	14.69	19.87	0.91	0.86	-1.81	34.95	66.65	6.66	5.7	4	2	2	1	1	1	2	0	0	0	0	0	0	0	0	3058	3093	709	1.53	-0.26	0.94	0.86
hSQ026661	NM_005096	ZMYM3	9203	2.11	0	0	1.91	3.53	-0.21	92.38	100	0.04	-0.08	-2.59	14.69	22.2	0.94	0.88	-0.67	108.64	100	7.82	7.36	3	0	0	0	0	1	3	1	0	0	0	0	0	0	0	1292	4113	112	1.61	-0.12	0.94	0.94
hSQ029492	NM_005649	ZNF354A	6940	2.11	0	0	-2.22	-0.73	0.15	90.93	100	1.08	1.15	4.1	5.86	10.33	0.56	0.72	0.33	108.17	100	4.11	4.32	0	1	0	0	0	0	1	0	0	0	1	0	0	0	0	530	1818	198	1.49	0.07	1.29	1.05
hSQ002889	NM_001014842	TM9SF1	10548	2.1	0	0	0.72	2.2	0.63	84.11	86.97	0.67	0.99	-1.69	14.69	34.03	0.91	0.87	-0.27	108.64	100	6.96	6.78	0	0	0	0	0	2	1	1	0	0	1	0	0	1	0	298	1470	348	1.48	0.32	0.95	0.97
hSQ019342	NM_018062	FANCL	55120	2.1	0	0	-1.82	-0.18	0.4	84.11	96.27	1.04	1.28	-3.16	9.63	18.01	0.93	0.88	0.06	108.17	100	6.39	6.44	0	0	0	0	0	1	1	0	1	0	0	0	0	0	0	520	1128	66	1.64	0.24	0.94	1.01
hSQ019260	NM_017666	ZNF280C	55609	2.1	0	0	0.01	1.77	-0.82	65.69	100	3.12	2.82	-0.17	21.69	58.6	0.87	0.86	-0.69	108.64	100	6.72	6.24	3	1	1	0	0	2	1	1	1	1	0	0	0	0	0	2264	2214	154	1.77	-0.3	0.99	0.93
hSQ025937	NM_001748	CAPN2	824	2.1	0	0	-0.77	0.67	-0.93	52.46	98.41	0.16	-0.23	-1.32	14.69	40.65	0.96	0.92	-0.89	108.64	100	6.34	5.95	2	0	0	1	0	2	2	1	0	0	0	0	0	0	0	1159	2103	142	1.44	-0.39	0.96	0.94
hSQ016687	NM_003174	SVIL	6840	2.09	0	0	-0.6	0.94	-1.01	43.3	92.95	-4.14	-4.63	0.65	29.81	60.21	0.77	0.82	-0.26	108.64	100	4.23	4.06	3	1	1	0	0	2	0	0	1	0	0	0	0	0	0	899	5367	450	1.54	-0.48	1.07	0.96
hSQ005335	NA	LINS1	55180	2.09	0	0	-1.56	0.26	0.22	90.93	100	0.88	1.01	4.54	4.62	7.33	0.37	0.68	0.26	108.17	100	3.31	3.48	NA	NA	NA	NA	NA	NA	NA	NA	NA	NA	NA	NA	NA	NA	NA	NA	NA	NA	1.82	0.13	1.86	1.05
hSQ032521	NM_000248	MITF	4286	2.09	0	0	1.98	3.32	-0.84	58.83	100	-2.76	-3.16	-0.14	21.69	58.86	0.84	0.84	0.02	108.17	100	5.21	5.22	2	2	1	2	1	0	0	0	0	0	0	0	0	0	0	3087	1260	121	1.34	-0.4	0.99	1
hSQ021268	NA	LOC222070	222070	2.09	0	0	1.18	2.76	-0.55	92.38	100	0.21	-0.12	1.91	22.31	42.69	0.34	0.7	0.35	108.17	100	2.64	2.8	NA	NA	NA	NA	NA	NA	NA	NA	NA	NA	NA	NA	NA	NA	NA	NA	NA	NA	1.58	-0.33	2.02	1.06
hSQ015724	NM_005192	CDKN3	1033	2.09	0	0	-2.26	-0.71	-0.58	91.91	100	0.68	0.45	-0.95	14.69	47.23	0.94	0.91	0.43	108.17	100	3.57	3.79	0	0	0	0	0	1	0	0	1	0	0	0	0	0	0	136	639	61	1.56	-0.24	0.97	1.06
hSQ034285	NM_001730	KLF5	688	2.09	0	0	-0.84	1.26	-0.42	92.38	100	-0.78	-1.03	1.53	23.79	49.58	0.66	0.81	-0.27	108.64	100	7.14	6.89	1	1	0	0	0	0	1	0	0	0	0	0	0	0	0	1651	1374	324	2.1	-0.25	1.22	0.96
hSQ033252	NM_014168	METTL5	29081	2.08	0	0	-0.48	1.21	-0.24	92.38	100	2.26	2.14	-1.7	14.69	33.93	0.99	0.94	-0.34	108.64	100	4.94	4.71	0	0	0	0	0	0	0	0	0	0	1	1	1	0	0	60	630	246	1.69	-0.12	0.95	0.95
hSQ038545	NM_022821	ELOVL1	64834	2.08	0	0	2.5	4.78	-3.68	0	0.43	0.47	-1.08	-8.09	2.1	15.46	0.94	0.8	-0.83	108.64	100	5.83	5.37	1	1	0	1	0	1	0	0	0	0	0	0	0	0	0	514	840	128	2.28	-1.56	0.85	0.92
hSQ012027	NM_004098	EMX2	2018	2.08	0	0	3.21	4.69	0.49	84.11	92.67	8.23	8.73	6.37	3.9	3.54	0.49	0.77	-0.18	108.64	100	4.25	4.16	0	0	0	0	0	0	0	0	0	0	0	0	0	0	0	1310	759	823	1.48	0.49	1.57	0.98
hSQ026500	NM_013375	ABT1	29777	2.08	0	0	0.43	2.09	-1.42	13.85	62.21	1.58	0.87	-2.85	14.69	19.98	0.89	0.84	-0.07	108.64	100	3.9	3.86	1	2	1	0	0	0	0	0	0	0	NA	NA	NA	NA	NA	1402	819	NA	1.66	-0.71	0.94	0.99
hSQ004804	NM_014321	ORC6L	23594	2.08	0	0	0.72	3.3	-0.37	92.38	100	2.35	2.11	0.08	29.81	60.44	0.89	0.9	0.15	108.17	100	4.52	4.66	1	1	0	0	0	0	1	0	0	0	0	0	0	0	0	808	759	60	2.58	-0.24	1.01	1.03
hSQ042937	NM_018323	PI4K2B	55300	2.08	0	0	-2.19	0.85	-1.13	30.1	84.42	-0.82	-1.63	0.65	29.81	60.18	0.86	0.91	0.06	108.17	100	3.63	3.69	3	1	1	2	0	0	1	0	0	0	0	0	0	0	0	1901	1446	111	3.04	-0.81	1.06	1.01
hSQ044396	NM_017779	DEPDC1	55635	2.07	0	0	-1.45	0.61	-1.29	21.42	72.18	2.06	1.13	-0.19	21.69	58.38	0.88	0.87	-0.01	108.64	100	4.06	4.05	3	1	1	1	0	0	2	0	0	0	NA	NA	NA	NA	NA	1676	1584	NA	2.05	-0.93	0.99	1
hSQ006106	NM_014045	LRP10	26020	2.06	0	0	0.56	2.71	-0.42	92.38	100	-2.54	-2.78	1.25	26.28	54	0.8	0.84	-0.21	108.64	100	6.36	6.14	0	0	0	0	0	2	2	0	0	0	0	0	0	0	0	553	2142	553	2.15	-0.24	1.05	0.96
hSQ044318	NA	C2orf12	192137	2.06	0	0	-1.47	0.39	-2.21	4.63	14.8	-1.07	-2.16	-2.26	14.69	25.76	0.92	0.82	-0.83	108.64	100	5.49	5.01	NA	NA	NA	NA	NA	NA	NA	NA	NA	NA	NA	NA	NA	NA	NA	NA	NA	NA	1.86	-1.09	0.89	0.91
hSQ005345	NM_002791	PSMA6	5687	2.06	0	0	0.02	1.41	0.13	90.93	100	0.91	1	-2.06	14.69	28.44	0.98	0.94	0.86	108.17	100	7.48	8.18	0	0	0	0	0	0	0	0	0	0	0	1	0	0	0	161	741	109	1.38	0.09	0.96	1.09
hSQ000582	NM_005124	NUP153	9972	2.05	0	0	-1.01	0.63	0	92.38	100	1.23	1.23	-0.78	19.17	50.22	0.94	0.91	-0.6	108.64	100	7.85	7.37	1	0	0	0	0	4	2	0	0	0	0	0	0	0	0	1059	4428	200	1.63	0	0.97	0.94
hSQ010372	NM_021034	IFITM3	10410	2.05	0	0	-0.8	0.77	0.34	84.11	98.68	-0.42	-0.2	-2.02	14.69	29.03	0.95	0.9	-0.02	108.64	100	5.44	5.43	0	0	0	0	0	0	1	0	0	0	0	0	0	0	0	165	402	101	1.57	0.23	0.95	1
hSQ020358	NM_024037	C1orf135	79000	2.04	0	0	2	3.75	-0.32	92.38	100	1.69	1.51	0.06	29.81	60.33	0.84	0.84	0.22	108.17	100	4.75	4.88	1	1	1	0	0	0	0	0	0	0	NA	NA	NA	NA	NA	987	1074	NA	1.75	-0.18	1	1.03
hSQ022974	NM_181521	CMTM4	146223	2.04	0	0	0.14	1.9	-1.47	13.85	57.87	0.62	0	-1.72	14.69	33.55	0.93	0.85	-0.92	108.64	100	3.68	3.18	5	3	2	2	0	0	0	0	0	0	0	0	0	0	0	7307	627	182	1.76	-0.62	0.91	0.86
hSQ008659	NM_003713	PPAP2B	8613	2.03	0	0	1.96	4.25	-0.85	58.83	100	-3.88	-4.47	2.03	21.91	40.58	0.67	0.8	-0.58	108.64	100	6.74	6.07	1	0	0	0	0	0	0	0	0	0	0	0	0	0	0	1788	936	568	2.29	-0.59	1.19	0.9
hSQ029362	NM_005870	SAP18	10284	2.03	0	0	1.08	3.47	-0.39	92.38	100	2.52	2.29	-1.87	14.69	31.14	0.99	0.95	-0.63	108.64	100	5.85	5.28	0	1	0	0	0	0	0	0	0	0	0	0	0	0	0	1493	462	64	2.39	-0.22	0.96	0.9
hSQ034545	NM_020770	CGN	57530	2.03	0	0	2.19	4.22	-3.09	1.6	0.56	1.73	0.39	-1.45	14.69	38.22	0.93	0.9	-2.49	28.06	38.65	5.85	4.31	1	1	1	1	1	0	0	0	0	0	0	0	0	0	0	1343	3612	133	2.03	-1.34	0.97	0.74
hSQ032891	NA	CCDC90A	63933	2.03	0	0	0.35	2.34	-0.32	92.38	100	2.01	1.83	-0.01	21.69	59.92	0.92	0.92	0.45	108.17	100	4.17	4.41	NA	NA	NA	NA	NA	NA	NA	NA	NA	NA	NA	NA	NA	NA	NA	NA	NA	NA	1.99	-0.18	1	1.06
hSQ019184	NM_024640	YRDC	79693	2.03	0	0	-0.88	0.7	-0.49	92.38	100	2.53	2.29	-2.47	14.69	23.41	0.97	0.91	0.55	108.17	100	4.75	5	0	0	0	0	0	0	0	0	0	0	NA	NA	NA	NA	NA	983	840	NA	1.58	-0.25	0.94	1.05
hSQ029351	NM_001116	ADCY9	115	2.03	0	0	1.26	3.27	-1.19	25.69	79.81	0.17	-0.59	-0.26	21.69	57.64	0.9	0.88	-1.01	108.17	100	5.92	5.32	1	2	1	0	0	2	2	1	0	0	0	0	0	0	0	3123	4062	539	2.02	-0.76	0.99	0.9
hSQ025338	NM_030793	FBXO38	81545	2.03	0	0	0.8	2.35	-0.33	92.38	100	-0.19	-0.4	0.39	29.81	61.05	0.76	0.79	-0.48	108.64	100	6.02	5.66	1	1	1	0	0	0	1	0	0	0	0	0	0	0	0	689	3342	120	1.55	-0.21	1.04	0.94
hSQ024152	NM_000505	F12	2161	2.02	0	0	0.11	1.66	-0.77	74.83	100	1.67	1.28	1.6	22.99	48.35	0.83	0.87	0.95	108.17	100	4.09	4.9	0	0	0	0	0	0	2	0	0	0	NA	NA	NA	NA	NA	154	1848	NA	1.55	-0.39	1.05	1.2
hSQ030763	NM_138428	C1orf212	113444	2.02	0	0	-0.68	0.69	-0.69	84.11	100	1.69	1.35	-0.44	21.69	55.53	0.92	0.89	0.06	108.17	100	4.23	4.27	1	3	0	0	0	1	1	0	0	0	1	0	0	0	0	1594	564	370	1.37	-0.34	0.97	1.01
hSQ032038	NM_144664	FAM76B	143684	2.02	0	0	-0.02	1.64	-1.08	35.24	88.41	0.49	0.01	-0.99	14.69	46.63	0.84	0.77	-0.04	108.64	100	3.52	3.5	2	1	1	1	0	0	0	0	0	0	0	0	0	0	0	2619	1020	312	1.66	-0.48	0.92	0.99
hSQ022916	NA	TFDP2	7029	2.01	0	0	-0.77	1.37	-0.65	90.93	100	-0.61	-0.91	2.3	19.17	35.47	0.76	0.83	-0.05	108.64	100	4.84	4.81	NA	NA	NA	NA	NA	NA	NA	NA	NA	NA	NA	NA	NA	NA	NA	NA	NA	NA	2.14	-0.31	1.1	0.99
hSQ011910	NM_002268	KPNA4	3840	2.01	0	0	-0.97	0.62	-0.48	92.38	100	-1.18	-1.4	-0.41	21.69	55.83	0.85	0.84	-0.29	108.64	100	6.5	6.24	2	2	1	0	0	0	0	0	0	0	0	0	0	0	0	1928	1566	306	1.59	-0.22	0.98	0.96
hSQ044069	NM_003664	AP3B1	8546	2.01	0	0	0.49	2.72	-0.47	92.38	100	-0.54	-0.83	3.24	8.9	19.79	0.67	0.83	0.31	108.17	100	7.56	7.87	1	1	0	0	0	0	1	0	0	0	0	0	0	0	0	575	3285	125	2.24	-0.29	1.25	1.04
hSQ028864	NM_005679	TAF1C	9013	2.01	0	0	0.86	2.18	0.04	90.93	100	0.25	0.28	0.02	29.81	60.08	0.82	0.82	0.03	108.17	100	4.26	4.28	2	2	1	0	0	0	0	0	0	0	0	0	0	0	0	1085	2610	228	1.33	0.02	1	1.01
hSQ000269	NM_032121	MAGT1	84061	2	0	0	-1.97	-0.57	-5.93	0	2.12	1.07	-1.35	-1.39	14.69	39.29	0.93	0.86	-1.23	66.03	97.99	7.59	6.44	3	2	2	3	2	0	0	0	0	0	NA	NA	NA	NA	NA	2855	1008	NA	1.41	-2.42	0.93	0.85
hSQ029968	NM_032326	TMEM175	84286	2	0	0	0.06	1.29	-0.16	92.38	100	0.57	0.48	0.35	29.81	61.08	0.83	0.84	0.44	108.17	100	4.71	4.94	0	0	0	0	0	1	1	0	1	0	0	0	0	0	0	157	1515	98	1.23	-0.09	1.01	1.05
hSQ029148	NM_004044	ATIC	471	2	0	0	-1.13	0.23	-0.05	92.38	100	1.9	1.88	-1.34	14.69	40.16	0.97	0.93	0.36	108.17	100	10.4	10.7	0	0	0	0	0	1	0	0	0	0	NA	NA	NA	NA	NA	99	1779	NA	1.36	-0.02	0.97	1.03
hSQ043987	NM_004387	NKX2-5	1482	2	0	0	-1.66	-0.16	0.5	84.11	92.27	4.65	4.93	-1.52	14.69	36.92	0.88	0.83	0.38	108.17	100	4.35	4.57	0	0	0	0	0	1	1	0	0	0	0	0	0	0	0	434	975	176	1.5	0.29	0.95	1.05
hSQ023216	NM_018346	RSAD1	55316	2	0	0	1.12	2.99	-0.4	92.38	100	2.08	1.84	-1.7	14.69	33.97	0.94	0.87	-0.12	108.64	100	4.83	4.77	1	2	1	0	0	0	0	0	0	0	0	0	0	0	0	1114	1329	56	1.87	-0.25	0.93	0.99
hSQ041879	NM_016216	DBR1	51163	2	0	0	-0.48	1.88	-0.54	92.38	100	0.37	0	1.11	26.68	55.87	0.86	0.91	0.23	108.17	100	6.69	6.97	0	1	0	0	0	0	0	0	0	0	0	0	0	0	0	878	1635	136	2.37	-0.37	1.05	1.04
hSQ016869	NM_005741	ZNF263	10127	1.99	0	0	2.02	3.36	0.34	84.11	98.88	0.18	0.36	-1.31	14.69	40.76	0.92	0.87	-0.01	108.64	100	4.68	4.67	0	0	0	0	0	1	1	1	0	0	0	0	0	0	0	897	2052	332	1.34	0.18	0.94	1
hSQ026120	NM_004252	SLC9A3R1	9368	1.99	0	0	1.05	2.41	0.54	84.11	90.53	0.02	0.33	-1.72	14.69	33.54	0.96	0.91	-0.75	108.64	100	7.57	7.06	0	1	0	0	0	0	0	0	0	0	0	0	0	0	0	699	1077	202	1.36	0.31	0.95	0.93
hSQ031907	NM_015074	KIF1B	23095	1.99	0	0	-2.63	-0.66	-1.5	13.85	55.96	0.63	-0.17	-2.27	14.69	25.65	0.98	0.93	-0.8	108.64	100	7.84	7.37	0	2	0	0	0	3	3	1	0	0	0	0	0	0	0	5009	5313	185	1.97	-0.79	0.94	0.94
hSQ033780	NM_030784	GPR63	81491	1.99	0	0	0.53	2.62	-0.37	92.38	100	3.24	3.06	2.48	19.17	32.04	0.68	0.79	0.12	108.17	100	3.5	3.57	0	0	0	0	0	2	1	1	0	0	0	0	0	0	0	424	1260	207	2.1	-0.18	1.15	1.02
hSQ024873	NM_133465	KIAA1958	158405	1.99	0	0	1.95	3.27	-1.21	25.69	78.68	-0.44	-1	-0.94	14.69	47.4	0.94	0.9	0.13	108.17	100	5.03	5.12	1	1	1	0	0	0	0	0	0	0	0	0	0	0	0	357	2151	175	1.33	-0.56	0.96	1.02
hSQ010032	NM_007137	ZNF81	347344	1.98	0	0	2.2	4.35	-3.33	1.6	0.18	-0.76	-2.34	-1.2	14.69	42.69	0.82	0.73	-1.78	34.95	68.33	5.39	4.42	2	3	0	0	0	0	1	0	0	0	0	0	0	0	0	5579	1986	368	2.16	-1.58	0.89	0.82
hSQ043240	NM_018719	CDCA7L	55536	1.98	0	0	-1.28	0.39	-3.34	1.6	0.17	-0.55	-1.81	-3.21	9.63	17.73	0.9	0.78	-0.85	108.64	100	5.9	5.4	1	2	1	1	1	0	0	0	0	0	0	0	0	0	0	1420	1365	84	1.67	-1.25	0.87	0.92
hSQ020379	NM_024045	DDX50	79009	1.98	0	0	0.68	2.01	-0.2	92.38	100	1.37	1.27	-0.62	21.69	52.78	0.91	0.89	-0.78	108.64	100	7.06	6.71	0	0	0	0	0	0	1	0	0	0	0	0	0	0	0	216	2214	107	1.33	-0.1	0.98	0.95
hSQ035167	NM_000919	PAM	5066	1.98	0	0	0	1.59	-1.17	30.1	81.31	-1.66	-2.28	-2.16	14.69	27	0.96	0.88	-1.28	59.85	95.64	6.2	5.32	1	1	1	0	0	1	2	0	0	0	0	0	0	0	0	647	2925	373	1.59	-0.62	0.91	0.86
hSQ027222	NM_032534	KRBA1	84626	1.97	0	0	1.01	2.79	-0.53	92.38	100	1.76	1.44	-2.06	14.69	28.45	0.9	0.85	-0.25	108.64	100	4.23	4.09	2	1	1	0	0	2	4	0	1	0	0	1	0	0	0	526	3092	399	1.78	-0.31	0.94	0.97
hSQ018378	NA	LOC441138	441138	1.97	0	0	-0.3	1.65	0.54	84.11	90.76	2.77	3.07	1.58	23.79	48.74	0.58	0.84	0.34	108.17	100	2.62	2.82	NA	NA	NA	NA	NA	NA	NA	NA	NA	NA	NA	NA	NA	NA	NA	NA	NA	NA	1.95	0.3	1.46	1.08
hSQ031619	NM_004444	EPHB4	2050	1.97	0	0	0.75	2.44	-1.77	7.95	36.72	-0.67	-1.65	0.19	29.81	60.86	0.57	0.59	-0.74	108.64	100	4.83	4.38	2	1	1	0	0	1	3	0	0	0	0	0	0	0	0	896	2964	491	1.69	-0.98	1.05	0.91
hSQ037044	NM_006390	IPO8	10526	1.97	0	0	-0.41	0.73	-1.3	21.42	71.66	-0.08	-0.73	-2.04	14.69	28.69	0.95	0.88	-1.82	34.95	66.38	7.9	7	3	1	1	0	0	1	0	0	0	0	0	0	0	0	0	1871	3114	170	1.15	-0.66	0.93	0.89
hSQ031795	NM_004529	MLLT3	4300	1.96	0	0	-0.4	1.25	0.19	90.93	100	2.56	2.64	-0.34	21.69	56.79	0.81	0.8	-0.31	108.64	100	5.34	5.11	1	0	0	1	0	1	1	1	0	0	0	0	0	0	0	1473	1707	259	1.66	0.08	0.98	0.96
hSQ007756	NM_015352	POFUT1	23509	1.96	0	0	0.34	2.03	-0.92	52.46	99.02	-0.05	-0.47	-1.79	14.69	32.45	0.94	0.88	-0.99	108.61	100	5.97	5.31	1	1	1	0	0	1	2	0	0	0	NA	NA	NA	NA	NA	4002	1167	NA	1.69	-0.42	0.94	0.89
hSQ016009	NM_139265	EHD4	30844	1.95	0	0	-1.6	-0.31	-0.56	92.38	100	0.73	0.48	-0.62	21.69	52.78	0.94	0.92	-0.78	108.64	100	7.64	7.08	1	2	1	0	0	0	0	0	0	0	0	0	0	0	0	1202	1626	50	1.29	-0.25	0.98	0.93
hSQ042926	NM_015114	ANKLE2	23141	1.95	0	0	-1.65	-0.38	-0.42	92.38	100	0.64	0.45	-1.43	14.69	38.49	0.91	0.85	-0.81	108.64	100	5.77	5.13	1	2	1	0	0	0	0	0	0	0	0	0	0	0	0	1574	2817	67	1.27	-0.18	0.94	0.89
hSQ011984	NM_144976	ZNF564	163050	1.95	0	0	-0.92	0.81	-0.02	92.38	100	-0.81	-0.82	1.4	25.16	51.72	0.53	0.69	-0.54	108.64	100	5.43	5.05	1	2	1	0	0	0	0	0	0	0	0	0	0	0	0	720	1662	171	1.72	-0.01	1.29	0.93
hSQ005483	NM_012346	NUP62	23636	1.95	0	0	2.82	4.33	-0.95	52.46	97.15	2.52	2.05	-2.29	14.69	25.41	0.94	0.89	-0.38	108.64	100	8.55	8.13	1	1	0	0	0	1	0	0	0	0	0	0	0	0	0	1414	1569	257	1.51	-0.47	0.94	0.95
hSQ029726	NM_002103	GYS1	2997	1.95	0	0	1.28	2.83	0.15	90.93	100	0.75	0.85	-2.61	14.69	21.95	0.95	0.9	-0.04	108.64	100	7.65	7.63	3	1	1	0	0	2	1	0	0	0	0	0	0	0	0	1162	2214	180	1.55	0.1	0.95	1
hSQ032659	NA	UTP18::NME1	51096::4830	1.95	0	0	-0.08	1.36	-0.44	92.38	100	2.63	2.38	-1.93	14.69	30.33	0.99	0.95	-0.33	108.64	100	8.76	8.5	NA	NA	NA	NA	NA	NA	NA	NA	NA	NA	NA	NA	NA	NA	NA	NA	NA	NA	1.45	-0.24	0.96	0.97
hSQ044699	NM_015158	KANK1	23189	1.95	0	0	3.84	5.28	-2.53	2.12	5.91	-2.64	-3.78	-2.1	14.69	27.89	0.9	0.84	-1.95	34.95	59.47	6.69	5.28	1	2	1	1	1	1	2	0	0	0	1	0	0	0	0	868	4059	135	1.44	-1.14	0.94	0.79
hSQ022920	NM_001018089	NARG2	79664	1.94	0	0	-1.5	-0.15	-0.99	43.3	94.36	0.18	-0.26	-1.34	14.69	40.23	0.88	0.86	-0.66	108.64	100	4.68	4.35	3	4	1	0	0	1	0	0	1	0	0	0	0	0	0	4024	2538	486	1.35	-0.44	0.97	0.93
hSQ022745	NM_003858	CCNK	8812	1.94	0	0	-0.23	1.47	-0.57	92.3	100	0.54	0.26	-0.23	21.69	58.05	0.84	0.83	-0.87	108.64	100	5.92	5.17	0	1	0	0	0	0	0	0	0	0	0	0	0	0	0	738	1065	130	1.7	-0.28	0.99	0.87
hSQ035301	NM_001076786	QSER1	79832	1.94	0	0	-2.32	-0.33	-0.41	92.38	100	0.28	0.1	-1.01	14.69	46.24	0.93	0.9	-0.33	108.64	100	4.22	4.09	3	2	2	2	1	2	0	0	0	0	0	0	0	0	0	3792	5208	267	1.99	-0.18	0.96	0.97
hSQ021705	NM_018410	HJURP	55355	1.94	0	0	0.54	2.1	-0.16	92.38	100	0.18	0.09	-0.76	19.17	50.5	0.89	0.87	-1.2	71.06	99.15	6.13	5.61	0	0	0	0	0	2	6	1	0	0	0	0	0	0	0	736	2247	66	1.57	-0.09	0.98	0.91
hSQ033752	NM_001081559	CPSF4	10898	1.94	0	0	-0.27	0.85	-0.94	52.46	97.78	0.8	0.4	-0.63	21.69	52.7	0.8	0.76	-0.08	108.64	100	5.26	5.21	1	3	0	1	0	0	0	0	0	0	0	0	0	0	0	873	735	143	1.12	-0.4	0.95	0.99
hSQ025073	NM_033550	TP53RK	112858	1.93	0	0	-1.32	0.19	-0.69	84.11	100	1.52	1.17	-0.03	21.69	59.73	0.81	0.81	-0.29	108.64	100	4.19	4.01	1	2	1	0	0	0	0	0	0	0	0	0	0	0	0	2387	762	223	1.51	-0.35	1	0.96
hSQ019018	NM_018265	C1orf106	55765	1.93	0	0	1.73	3.17	-0.97	43.3	95.45	-1.44	-1.93	-0.88	19.17	48.45	0.82	0.78	-1.9	34.95	62.05	5.73	4.5	2	2	1	0	0	1	3	0	0	0	NA	NA	NA	NA	NA	2106	1992	NA	1.44	-0.49	0.96	0.79
hSQ034027	NM_153226	TMEM20	159371	1.93	0	0	1.41	3.53	-2.1	4.63	19.2	1.77	0.1	0.36	29.81	61.07	0.77	0.79	-0.03	108.64	100	3.29	3.26	2	2	1	0	0	3	0	0	1	0	0	0	0	0	0	1243	1095	61	2.11	-1.67	1.03	0.99
hSQ028507	NM_004782	SNAP29	9342	1.93	0	0	0.44	1.81	-0.39	92.38	100	0.23	0	-1.84	14.69	31.63	0.91	0.87	0.38	108.17	100	4.58	4.82	1	1	1	0	0	0	0	0	0	0	0	0	0	0	0	1984	777	107	1.37	-0.22	0.95	1.05
hSQ019823	NM_015999	ADIPOR1	51094	1.93	0	0	0.48	1.91	0.16	90.93	100	1.3	1.37	0.77	29.81	59.42	0.68	0.74	0.31	108.17	100	4.02	4.15	0	0	0	0	0	0	0	0	0	0	0	0	0	0	0	748	1128	193	1.42	0.08	1.09	1.03
hSQ018877	NM_015235	CSTF2T	23283	1.93	0	0	0.38	2.03	-0.34	92.38	100	1.1	0.89	2.44	19.17	32.74	0.65	0.81	-0.73	108.64	100	9.05	8.16	1	0	0	0	0	1	1	1	0	0	NA	NA	NA	NA	NA	2212	1851	NA	1.65	-0.21	1.25	0.9
hSQ033870	NM_018227	UBA6	55236	1.93	0	0	-0.74	0.48	0.05	90.93	100	-0.22	-0.19	-1.39	14.69	39.28	0.94	0.91	0.12	108.17	100	8.08	8.14	1	0	0	0	0	5	1	1	2	1	0	0	0	0	0	3236	3159	52	1.22	0.03	0.97	1.01
hSQ037754	NM_203374	ZNF784	147808	1.92	0	0	-0.05	1.91	0	92.38	100	0.91	0.91	1.13	26.68	55.58	0.76	0.8	-0.87	108.64	100	5.64	5.01	0	0	0	0	0	2	2	1	0	0	NA	NA	NA	NA	NA	1010	972	NA	1.97	0	1.06	0.89
hSQ042249	NM_032797	AIFM2	84883	1.92	0	0.01	-0.15	1.24	-0.11	92.38	100	-2.39	-2.45	0.08	29.81	60.44	0.9	0.9	0.79	108.17	100	6.13	6.55	1	1	0	1	0	0	0	0	0	0	0	1	0	0	0	1904	1122	214	1.39	-0.06	1	1.07
hSQ038242	NM_030818	CCDC130	81576	1.92	0	0.01	-1.3	0.14	0.38	84.11	97.04	0.16	0.32	0.45	29.81	60.98	0.65	0.72	0.39	108.17	100	4.33	4.55	1	1	1	0	0	0	0	0	0	0	0	0	0	0	0	224	1191	217	1.43	0.16	1.1	1.05
hSQ028508	NM_001012968	SPIN4	139886	1.92	0	0.02	-0.1	1.45	-0.18	92.38	100	0.34	0.25	0.78	29.71	59.33	0.7	0.76	0.14	108.17	100	6.66	6.78	3	0	0	0	0	0	1	0	0	0	1	0	0	0	0	2841	750	520	1.55	-0.09	1.09	1.02
hSQ026323	NM_012259	HEY2	23493	1.92	0	0.07	2.93	4.57	-1.49	13.85	56.44	1.52	0.86	1.04	27.27	56.71	0.61	0.71	-0.07	108.64	100	3.99	3.94	1	1	0	0	0	0	2	0	0	0	0	0	0	0	0	1466	1014	191	1.64	-0.67	1.17	0.99
hSQ036468	NA	PLEKHA7::LOC283278	144100::283278	1.92	0	0.1	1.34	2.9	-0.27	92.38	100	-0.23	-0.34	-0.54	21.69	54.12	0.83	0.81	-0.49	108.64	100	4.62	4.34	NA	NA	NA	NA	NA	NA	NA	NA	NA	NA	NA	NA	NA	NA	NA	NA	NA	NA	1.56	-0.11	0.97	0.94
hSQ002982	NM_181358	HIPK1	204851	1.91	0	0.15	-0.15	1.98	-1.06	35.24	89.35	-2.1	-2.95	0.62	29.81	60.38	0.84	0.91	-0.1	108.64	100	5.31	5.18	2	1	1	2	1	2	1	0	0	0	0	0	0	0	0	4287	2451	63	2.13	-0.85	1.08	0.98
hSQ031584	NM_018222	PARVA	55742	1.91	0	0.15	0.65	2.07	-0.06	92.38	100	-0.25	-0.29	-0.92	14.69	47.88	0.94	0.92	-0.02	108.64	100	6.28	6.27	2	0	0	1	0	2	0	0	0	0	NA	NA	NA	NA	NA	1938	1119	NA	1.43	-0.04	0.98	1
hSQ000926	NM_002498	NEK3	4752	1.91	0	0.22	-1.23	0.03	0.29	84.11	100	1.68	1.81	-1.06	14.69	45.21	0.89	0.87	-0.24	108.64	100	6.46	6.3	0	0	0	0	0	3	2	1	1	0	0	1	0	0	0	499	1521	376	1.26	0.13	0.98	0.98
hSQ019098	NM_002898	RBMS2	5939	1.9	0	0.29	1	2.49	0.09	90.93	100	-0.59	-0.54	2.19	21.69	37.43	0.21	0.46	-0.71	108.64	100	4.24	3.89	1	0	0	0	0	1	1	1	0	0	0	0	0	0	0	691	1224	82	1.49	0.05	2.14	0.92
hSQ039123	NM_021930	RINT1	60561	1.9	0	0.31	1.5	3.4	-0.61	91.61	100	1.05	0.8	-0.68	21.69	51.86	0.94	0.92	0.49	108.17	100	6.84	7.28	0	0	0	0	0	1	1	1	1	1	0	0	0	0	0	366	2379	231	1.9	-0.25	0.98	1.06
hSQ032478	NM_018062	FANCL	55120	1.9	0	0.36	-0.37	1.23	-0.06	92.38	100	0.77	0.75	-1.21	14.69	42.62	0.93	0.89	0.25	108.17	100	7.01	7.16	0	0	0	0	0	1	1	0	1	0	0	0	0	0	0	520	1128	66	1.6	-0.02	0.95	1.02
hSQ012526	NM_003664	AP3B1	8546	1.9	0	0.39	-1.93	-0.26	-0.13	92.38	100	-0.3	-0.37	0.02	29.81	60.09	0.83	0.83	0.19	108.17	100	8.14	8.27	1	1	0	0	0	0	1	0	0	0	0	0	0	0	0	575	3285	125	1.67	-0.07	1	1.02
hSQ031283	NM_018206	VPS35	55737	1.9	0	0.4	1.21	2.4	-1.19	25.69	79.61	1.14	0.47	-1.32	14.69	40.53	0.94	0.89	-0.55	108.64	100	8.55	8.12	1	1	1	0	0	1	1	0	0	0	0	0	0	0	0	795	2391	99	1.18	-0.67	0.95	0.95
hSQ031326	NM_024328	THTPA	79178	1.89	0	0.41	0.69	2.33	0.27	90.93	100	1.19	1.34	1.42	25.16	51.42	0.72	0.78	0.2	108.17	100	3.83	3.96	1	2	0	0	0	0	2	0	0	0	0	0	0	0	0	703	693	736	1.63	0.14	1.09	1.03
hSQ014110	NM_052905	FMNL2	114793	1.89	0	0.44	-2.18	-0.93	-0.2	92.38	100	-1.08	-1.19	-2.37	14.69	24.47	0.89	0.84	-0.34	108.64	100	5.36	5.18	1	2	1	0	0	3	1	1	0	0	0	0	0	0	0	1927	3279	367	1.25	-0.1	0.95	0.97
hSQ034210	NM_032121	MAGT1	84061	1.89	0	0.48	-1.97	-0.75	-4.02	0	0.99	2.34	0.56	-2.66	14.69	21.51	0.97	0.91	-0.74	108.64	100	7.14	6.72	3	2	2	3	2	0	0	0	0	0	NA	NA	NA	NA	NA	2855	1008	NA	1.22	-1.79	0.93	0.94
hSQ040595	NM_138410	CMTM7	112616	1.89	0	0.52	-1.27	-0.02	-0.72	84.11	100	2.26	1.94	0.11	29.81	60.56	0.84	0.85	0.04	108.17	100	3.96	3.98	3	2	1	1	1	1	0	0	0	0	0	0	0	0	0	587	528	236	1.25	-0.32	1.01	1.01
hSQ022180	NM_080652	TMEM41A	90407	1.89	0	0.53	0.04	1.99	-2.29	3.76	11.97	0.73	-0.37	-1.78	14.69	32.57	0.91	0.83	-0.37	108.64	100	4.48	4.3	1	0	0	0	0	1	1	1	0	0	0	0	0	0	0	524	795	53	1.95	-1.1	0.91	0.96
hSQ043718	NM_002226	JAG2	3714	1.88	0	0.55	1.16	3.05	-0.74	74.83	100	0.89	0.6	0.52	29.81	60.78	0.79	0.82	-0.47	108.64	100	5.68	5.26	1	1	1	0	0	5	6	2	2	1	1	0	0	0	0	955	3717	404	1.89	-0.29	1.03	0.93
hSQ027778	NM_006830	UQCR	10975	1.88	0	0.57	-0.16	1.2	0.53	84.11	91.02	2.67	2.91	-0.82	19.17	49.6	0.92	0.88	0.3	108.17	100	3.77	3.92	2	1	0	1	0	0	0	0	0	0	NA	NA	NA	NA	NA	1069	171	NA	1.35	0.25	0.95	1.04
hSQ012702	NM_052911	ESCO1	114799	1.88	0	0.57	0.2	1.54	-0.55	92.38	100	1.2	0.89	-1.08	14.69	44.88	0.95	0.9	-0.19	108.64	100	4.89	4.77	0	0	0	0	0	0	2	0	0	0	0	0	0	0	0	1042	2523	934	1.33	-0.31	0.95	0.97
hSQ029913	NM_004987	LIMS1	3987	1.88	0	0.63	-2.92	-1.59	-0.07	92.38	100	1.82	1.79	0.83	29.12	58.93	0.84	0.9	-0.07	108.64	100	5.59	5.51	1	0	0	0	0	0	0	0	0	0	0	0	0	0	0	432	978	119	1.33	-0.04	1.07	0.99
hSQ038558	NM_012346	NUP62	23636	1.88	0	0.66	-0.11	1.3	-1.11	30.1	85.72	0.44	-0.11	0.42	29.81	61.02	0.73	0.75	-0.73	108.64	100	7.04	6.66	1	1	0	0	0	1	0	0	0	0	0	0	0	0	0	1414	1569	257	1.41	-0.54	1.03	0.95
hSQ039718	NM_024045	DDX50	79009	1.88	0	0.69	0.61	1.95	0.5	84.11	92.14	1.38	1.64	-1.11	14.69	44.35	0.91	0.88	0.19	108.17	100	7.01	7.11	0	0	0	0	0	0	1	0	0	0	0	0	0	0	0	216	2214	107	1.34	0.25	0.96	1.01
hSQ030150	NM_002633	PGM1	5236	1.87	0	0.73	1.54	3.33	-1.2	25.69	79.37	1.13	0.34	-1.15	14.69	43.62	0.92	0.88	-2.34	32.47	42.81	9.92	8.22	2	1	1	0	0	1	0	0	0	0	0	0	0	0	0	568	1689	213	1.79	-0.79	0.96	0.83
hSQ001373	NM_004924	ACTN4	81	1.87	0	0.75	1.18	2.37	-0.64	91.61	100	-0.01	-0.34	-1.45	14.69	38.29	0.93	0.89	0.11	108.17	100	9.69	9.81	1	1	1	0	0	3	0	0	0	0	0	0	0	0	0	1098	2736	59	1.19	-0.33	0.96	1.01
hSQ033726	NM_033547	INTS4	92105	1.87	0	0.83	0.77	1.93	-0.13	92.38	100	1.17	1.1	-0.7	21.69	51.64	0.9	0.88	-0.51	108.64	100	8.17	7.91	0	0	0	0	0	3	3	2	0	0	NA	NA	NA	NA	NA	227	2892	NA	1.16	-0.06	0.98	0.97
hSQ022438	NM_006572	GNA13	10672	1.86	0	0.85	-0.1	1.46	-0.76	74.83	100	-0.56	-0.9	-0.81	19.17	49.73	0.88	0.84	-0.04	108.64	100	4.86	4.84	4	1	0	2	0	0	0	0	0	0	NA	NA	NA	NA	NA	3541	1134	NA	1.56	-0.34	0.95	0.99
hSQ038365	NM_012333	MYCBP	26292	1.86	0	0.85	-0.22	1.34	-0.56	92.3	100	0.68	0.43	-0.71	21.69	51.4	0.89	0.86	-0.04	108.64	100	3.4	3.37	2	2	0	2	0	0	0	0	0	0	0	0	0	0	0	1705	312	73	1.56	-0.25	0.97	0.99
hSQ018516	NM_207309	UAP1L1	91373	1.86	0	0.87	0.34	1.63	-1.12	30.1	85.03	0.35	-0.12	0.17	29.81	60.8	0.74	0.75	-0.3	108.64	100	5.04	4.91	2	1	1	1	1	1	1	0	0	0	0	0	0	0	0	1810	1155	236	1.28	-0.46	1.02	0.98
hSQ040710	NM_014580	SLC2A8	29988	1.86	0	0.95	0.35	1.86	-0.14	92.38	100	1.24	1.15	-1.02	14.69	45.99	0.88	0.86	-0.14	108.64	100	4.39	4.31	1	0	0	1	0	1	2	1	0	0	NA	NA	NA	NA	NA	633	1434	NA	1.51	-0.09	0.97	0.98
hSQ043942	NM_001079855	GYG2	8908	1.86	0	0.95	0.2	1.71	-0.56	92.38	100	-0.06	-0.36	-2.08	14.69	28.09	0.92	0.86	-0.58	108.64	100	6.43	5.95	0	2	0	0	0	1	0	0	0	0	0	0	0	0	0	1607	1413	282	1.51	-0.3	0.94	0.93
hSQ033784	NM_007198	PROSC	11212	1.86	0	0.96	0.9	2.5	-2.42	2.6	8.49	1.56	0.55	0.51	29.81	60.83	0.85	0.87	-0.81	108.64	100	4.87	4.42	2	0	0	1	0	0	0	0	0	0	0	0	0	0	0	1663	828	503	1.6	-1.01	1.02	0.91
hSQ029551	NM_020123	TM9SF3	56889	1.85	0	1.03	0.27	1.52	-0.62	91.61	100	0.43	0.11	-1.29	14.69	41.14	0.91	0.88	-0.83	108.64	100	6.56	5.92	0	0	0	0	0	2	2	1	0	0	0	0	0	0	0	1590	1770	217	1.25	-0.32	0.97	0.9
hSQ009497	NM_006001	TUBA3C	7278	1.85	0	1.1	-0.07	1.46	0.12	90.93	100	2.03	2.1	-1.79	14.69	32.53	0.92	0.87	-0.25	108.64	100	11.22	10.94	0	0	0	0	0	1	1	1	0	0	NA	NA	NA	NA	NA	83	1353	NA	1.53	0.07	0.94	0.98
hSQ033976	NM_030969	TMEM14B	81853	1.85	0	1.13	-0.46	1.03	-0.38	92.38	100	2.7	2.44	-0.41	21.69	55.92	0.97	0.95	0.24	108.17	100	5.01	5.19	0	0	0	0	0	1	1	1	0	0	0	0	0	0	0	459	345	109	1.49	-0.26	0.98	1.04
hSQ032154	NM_013995	LAMP2	3920	1.85	0	1.17	0.85	2.29	-0.51	92.38	100	0.31	-0.02	-2.63	14.69	21.76	0.95	0.91	-0.42	108.64	100	9.82	9.15	1	1	0	0	0	1	0	0	0	0	0	0	0	0	0	2635	1233	137	1.44	-0.33	0.95	0.93
hSQ024043	NM_006990	WASF2	10163	1.84	0	1.28	1.81	3.93	-2.71	2.12	3.2	-0.76	-1.93	-1.05	14.69	45.47	0.83	0.77	-1.69	37.98	73.33	5.81	4.65	4	2	0	0	0	0	1	0	0	0	0	0	0	0	0	2557	1497	216	2.12	-1.17	0.92	0.8
hSQ042196	NM_194279	ISCA2	122961	1.84	0	1.32	0.28	1.42	0.19	90.93	100	1.48	1.58	-0.39	21.69	56.12	0.92	0.9	0.25	108.17	100	3.32	3.49	1	0	0	1	0	0	0	0	0	0	NA	NA	NA	NA	NA	466	465	NA	1.14	0.1	0.98	1.05
hSQ028993	NM_001085354	MORC4	79710	1.83	0	1.35	-2.61	-1.14	-0.45	92.38	100	4.77	4.48	-0.04	21.69	59.69	0.91	0.91	1.19	85.33	100	6.22	7.29	2	0	0	1	0	1	1	1	1	1	0	0	0	0	0	818	2703	243	1.47	-0.3	1	1.17
hSQ006064	NM_018439	IMPACT	55364	1.83	0	1.36	-1.93	-0.42	-0.5	92.38	100	0.04	-0.2	1.55	23.79	49.28	0.77	0.81	-0.24	108.64	100	3.66	3.54	2	1	1	0	0	0	0	0	0	0	NA	NA	NA	NA	NA	2671	963	NA	1.51	-0.24	1.05	0.97
hSQ011761	NM_002655	PLAG1	5324	1.83	0	1.43	3.22	4.46	-2.57	2.12	5.22	0.88	-0.29	-1.13	14.69	44.06	0.9	0.75	-1.82	34.95	66.26	3.52	2.74	2	3	1	1	1	0	1	0	0	0	2	0	0	0	0	5319	1503	480	1.24	-1.16	0.83	0.78
hSQ036399	NM_015158	KANK1	23189	1.83	0	1.43	2.93	4.62	-1.46	13.85	58.48	-3.07	-3.96	-0.02	21.69	59.85	0.83	0.83	-2.47	28.06	39.09	6.36	5.01	1	2	1	1	1	1	2	0	0	0	1	0	0	0	0	868	4059	135	1.68	-0.89	1	0.79
hSQ031175	NM_004229	MED14	9282	1.83	0	1.44	0.38	1.94	-0.62	91.61	100	0.09	-0.19	-1.23	14.69	42.24	0.96	0.93	-0.69	108.64	100	7.49	6.83	2	0	0	0	0	2	4	2	0	0	0	0	0	0	0	2263	4365	140	1.57	-0.28	0.97	0.91
hSQ036740	NM_018727	TRPV1	7442	1.83	0	1.44	-0.79	0.62	0.25	90.93	100	-0.11	0.03	0.98	28.01	57.37	0.65	0.76	-0.01	108.64	100	3.79	3.78	1	2	1	0	0	0	0	0	0	0	0	1	0	0	0	1368	2519	158	1.4	0.14	1.17	1
hSQ044710	NM_138473	SP1	6667	1.83	0	1.47	-1.24	0.01	-0.93	52.46	98.36	-0.22	-0.59	-0.64	21.69	52.55	0.91	0.88	-0.86	108.64	100	6.87	6.21	9	4	1	2	0	1	1	1	0	0	0	0	0	0	0	5200	2358	97	1.26	-0.37	0.96	0.9
hSQ041137	NM_016282	AK3	50808	1.83	0	1.49	-0.61	0.74	-0.49	92.38	100	-0.71	-0.95	-0.74	19.17	50.92	0.93	0.91	0.15	108.17	100	3.85	3.94	3	0	0	1	0	0	0	0	0	0	0	0	0	0	0	1818	684	140	1.35	-0.24	0.97	1.02
hSQ002950	NM_005935	AFF1	4299	1.82	0	1.53	0.92	2.66	-1.04	35.24	91.04	-0.99	-1.46	-0.81	19.17	49.79	0.96	0.93	-0.53	108.64	100	5.66	5.2	8	3	2	1	0	5	2	1	0	0	0	0	0	0	0	5338	3633	407	1.74	-0.47	0.97	0.92
hSQ023122	NM_017952	PTCD3	55037	1.82	0	1.53	-1.37	0.08	-0.06	92.38	100	-0.08	-0.11	-0.69	21.69	51.66	0.89	0.86	0.74	108.17	100	6.62	7.25	4	1	1	1	1	2	2	2	1	1	NA	NA	NA	NA	NA	4598	2070	NA	1.45	-0.03	0.96	1.09
hSQ020135	NM_032409	PINK1	65018	1.82	0	1.58	0.81	2.14	-0.83	65.69	100	0.68	0.27	-0.27	21.69	57.63	0.9	0.89	0.6	108.17	100	4.97	5.2	1	1	1	0	0	1	1	0	0	0	0	0	0	0	0	819	1746	94	1.34	-0.41	0.99	1.05
hSQ021952	NM_015901	NUDT13	25961	1.82	0	1.6	0.51	2.09	0.1	90.93	100	0.72	0.76	2.52	14.69	31.38	0.56	0.72	-0.28	108.64	100	3.61	3.44	0	1	0	0	0	1	1	0	0	0	0	0	0	0	0	919	1059	125	1.58	0.04	1.28	0.95
hSQ035187	NM_006415	SPTLC1	10558	1.82	0	1.67	-2.37	-0.69	-1.49	13.85	56.78	0.8	-0.05	-2.05	14.69	28.57	0.95	0.87	0.27	108.17	100	6.7	6.89	1	1	1	0	0	0	0	0	0	0	NA	NA	NA	NA	NA	1320	1422	NA	1.68	-0.85	0.92	1.03
hSQ045358	NM_213589	RAPH1	65059	1.81	0	1.73	1.38	2.8	-0.86	58.83	100	-0.64	-1.08	-0.95	14.69	47.33	0.96	0.93	-0.6	108.64	100	6.66	6.35	4	4	3	0	0	1	0	0	0	0	0	0	0	0	0	5619	3753	225	1.43	-0.44	0.97	0.95
hSQ020997	NM_007218	RNF139	11236	1.81	0	1.78	4.43	5.68	-1.62	9.09	46.91	0.3	-0.46	1.02	27.27	56.92	0.6	0.72	-0.13	108.64	100	4.56	4.5	0	0	0	0	0	3	4	1	0	0	0	0	0	0	0	973	1995	343	1.25	-0.76	1.18	0.99
hSQ021606	NM_004059	CCBL1	883	1.81	0	1.81	1.1	2.5	-0.26	92.38	100	-0.35	-0.49	0.05	29.81	60.29	0.83	0.83	0.21	108.17	100	5.45	5.64	1	1	0	0	0	0	0	0	0	0	0	0	0	0	0	470	1269	185	1.4	-0.15	1	1.04
hSQ029659	NM_002768	CHMP1A	5119	1.81	0	1.84	1.04	2.2	-0.83	65.69	100	1.76	1.33	-2.14	14.69	27.32	0.97	0.93	-0.2	108.64	100	5.99	5.86	4	2	2	0	0	0	0	0	0	0	0	0	0	0	0	1629	591	133	1.16	-0.43	0.96	0.98
hSQ012349	NM_004219	PTTG1	9232	1.8	0.07	1.95	0.73	2.62	0.61	84.11	87.67	1.83	2.11	-1.56	14.69	36.21	0.99	0.95	-0.28	108.64	100	7.56	7.26	0	0	0	0	0	0	1	0	0	0	NA	NA	NA	NA	NA	57	609	NA	1.9	0.29	0.96	0.96
hSQ027249	NM_001431	EPB41L2	2037	1.8	0.07	1.97	0.58	1.83	-0.25	92.38	100	1.64	1.48	-1.53	14.69	36.83	0.92	0.88	-1.08	81.59	100	8.75	7.79	1	0	0	0	0	1	1	1	0	0	NA	NA	NA	NA	NA	1254	3018	NA	1.25	-0.16	0.96	0.89
hSQ010109	NA	KIAA1754L	150771	1.8	0.07	1.98	-1.48	0.02	-0.13	92.38	100	2.08	2.01	0.01	29.81	60.04	0.81	0.81	0.05	108.17	100	5.16	5.2	NA	NA	NA	NA	NA	NA	NA	NA	NA	NA	NA	NA	NA	NA	NA	NA	NA	NA	1.5	-0.07	1	1.01
hSQ038598	NM_014510	PCLO	27445	1.8	0.07	1.98	0.8	2.31	-0.76	74.83	100	1.46	0.99	1.21	26.28	54.53	0.54	0.68	-0.47	108.64	100	4.74	4.46	1	1	0	0	0	1	3	0	0	0	0	1	0	0	0	1998	14808	289	1.51	-0.46	1.26	0.94
hSQ006121	NM_032323	TMEM79	84283	1.8	0.07	1.99	-1.1	0.36	-0.16	92.38	100	0.04	-0.04	0.09	29.81	60.47	0.74	0.75	-0.42	108.64	100	4.42	4.15	1	1	0	1	0	2	2	1	0	0	0	0	0	0	0	831	1185	161	1.47	-0.07	1	0.94
hSQ021306	NM_005879	TRAIP	10293	1.8	0.07	2.01	-0.5	0.92	0.2	90.93	100	2.04	2.12	0.05	29.81	60.25	0.82	0.82	0.26	108.17	100	5.79	6.01	1	0	0	0	0	2	3	2	0	0	0	0	0	0	0	508	1410	106	1.43	0.08	1	1.04
hSQ015389	NM_182540	DDX26B	203522	1.8	0.07	2.02	0.13	1.31	-0.66	90.93	100	0.12	-0.21	-0.41	21.69	55.94	0.84	0.82	-0.71	108.64	100	4.95	4.63	2	1	1	1	0	1	0	0	1	0	0	0	0	0	0	873	2586	334	1.18	-0.33	0.98	0.94
hSQ035733	NM_024704	KIF16B	55614	1.8	0.07	2.04	1.86	3.44	-1.3	21.42	71.54	-0.16	-0.77	-0.43	21.69	55.63	0.93	0.91	0.05	108.17	100	5.91	5.96	1	2	1	0	0	2	2	1	2	1	0	0	0	0	0	1149	3954	158	1.58	-0.61	0.98	1.01
hSQ022125	NM_017444	CHRAC1	54108	1.79	0.07	2.09	-1.85	-0.64	-0.64	91.61	100	1.11	0.87	0.5	29.81	60.85	0.79	0.86	-0.12	108.64	100	3.44	3.38	0	0	0	0	0	0	0	0	0	0	0	0	0	0	0	1906	396	195	1.21	-0.24	1.09	0.98
hSQ000849	NM_015976	SNX7	51375	1.79	0.07	2.15	-0.39	1.17	-0.64	91.61	100	1.16	0.78	-0.87	19.17	48.69	0.9	0.88	0.14	108.17	100	4.3	4.41	0	0	0	0	0	1	1	1	0	0	0	0	0	0	0	367	1164	267	1.56	-0.38	0.97	1.02
hSQ020406	NM_022736	MFSD1	64747	1.79	0.07	2.16	-0.86	0.61	-1.43	13.85	60.83	0.17	-0.54	-2.61	14.69	22.04	0.95	0.88	-0.35	108.64	100	4.04	3.85	0	0	0	0	0	1	1	1	0	0	NA	NA	NA	NA	NA	733	1398	NA	1.47	-0.71	0.92	0.95
hSQ042747	NM_020728	FAM62B	57488	1.79	0.07	2.17	-1.29	0.01	-0.65	90.93	100	-0.9	-1.15	-2.11	14.69	27.73	0.9	0.85	-0.87	108.64	100	5.82	5.34	1	5	1	1	1	1	0	0	0	0	0	0	0	0	0	3209	2682	66	1.3	-0.26	0.94	0.92
hSQ021435	NM_000112	SLC26A2	1836	1.79	0.07	2.25	-0.84	1.49	-1.25	25.69	75.59	0.13	-0.65	-0.56	21.69	53.81	0.9	0.86	-1.17	71.06	100	6.4	5.54	5	2	1	1	0	3	3	2	1	1	0	0	0	0	0	5583	2220	268	2.33	-0.78	0.95	0.87
hSQ026231	NM_017526	LEPROT	54741	1.78	0.07	2.28	0.75	2.22	-0.93	52.46	98.46	-0.5	-0.96	0.42	29.81	61.02	0.8	0.82	0.8	108.17	100	3.73	4.07	0	0	0	0	0	2	2	1	1	1	0	0	0	0	0	647	396	89	1.47	-0.47	1.02	1.09
hSQ030733	NM_139075	TPCN2	219931	1.78	0.07	2.3	0.42	1.98	0.04	90.93	100	0.99	1.01	-0.56	21.69	53.69	0.85	0.82	-0.96	108.63	100	5.45	4.86	1	1	1	0	0	1	1	0	0	0	0	0	0	0	0	571	2259	101	1.56	0.02	0.97	0.89
hSQ021124	NM_000183	HADHB	3032	1.78	0.07	2.32	-0.99	0.29	-2.98	1.97	0.98	0.97	-0.45	-2.04	14.69	28.73	0.95	0.88	-0.18	108.64	100	8.41	8.28	0	1	0	0	0	1	0	0	0	0	0	1	0	0	0	511	1425	251	1.28	-1.42	0.93	0.98
hSQ001006	NM_002268	KPNA4	3840	1.78	0.07	2.38	-0.74	0.72	-0.08	92.38	100	-1.06	-1.1	1.24	26.28	54.05	0.83	0.87	-0.48	108.64	100	6.78	6.41	2	2	1	0	0	0	0	0	0	0	0	0	0	0	0	1928	1566	306	1.45	-0.04	1.06	0.95
hSQ033853	NM_002069	GNAI1	2770	1.78	0.07	2.43	-0.74	0.58	-1.26	21.42	74.61	1.13	0.57	-1.52	14.69	36.92	0.91	0.88	-0.63	108.64	100	7.33	6.87	2	1	1	0	0	0	0	0	0	0	0	0	0	0	0	1916	1065	337	1.31	-0.56	0.96	0.94
hSQ040581	NM_145048	C4orf28	133015	1.77	0.07	2.46	-2.21	-1.02	-0.32	92.38	100	0.78	0.62	-0.53	21.69	54.24	0.91	0.89	0.47	108.17	100	3.56	3.83	0	0	0	0	0	1	1	1	0	0	0	0	0	0	0	1009	666	138	1.18	-0.15	0.98	1.08
hSQ006691	NM_001344	DAD1	1603	1.77	0.07	2.5	1.41	3.17	0.08	90.93	100	2.22	2.27	-1.55	14.69	36.41	1	0.96	0.01	108.17	100	6.06	6.06	2	0	0	0	0	0	0	0	0	0	0	0	0	0	0	275	342	66	1.76	0.04	0.96	1
hSQ043126	NM_012087	GTF3C5	9328	1.77	0.07	2.51	-0.75	0.78	-0.93	52.46	98.47	0.95	0.56	-1.78	14.69	32.58	0.96	0.9	-0.5	108.64	100	6.25	5.89	1	1	1	0	0	0	1	0	0	0	0	0	0	0	0	520	1560	286	1.53	-0.4	0.94	0.94
hSQ011236	NM_005841	SPRY1	10252	1.77	0.07	2.52	1.14	3.16	-0.23	92.38	100	-0.66	-0.83	2.14	21.69	38.47	0.61	0.77	-0.47	108.64	100	4.51	4.09	1	0	0	1	0	1	2	1	0	0	0	0	0	0	0	1201	960	322	2.02	-0.18	1.26	0.91
hSQ031758	NM_001099642	FLJ11171	55783	1.77	0.07	2.55	2.09	3.74	0.03	90.93	100	-1.65	-1.63	0.4	29.81	61.05	0.8	0.84	0.76	108.17	100	4.73	5.07	0	0	0	0	0	2	2	1	0	0	1	1	0	0	0	1308	2313	406	1.65	0.01	1.05	1.07
hSQ041769	NM_003070	SMARCA2	6595	1.77	0.07	2.56	1.73	3.58	-1.78	7.95	36.13	-1.96	-2.76	-1	14.69	46.33	0.89	0.85	-2.2	34.95	48	7.3	6.24	0	1	0	0	0	0	0	0	0	0	0	0	0	0	0	882	4773	99	1.85	-0.8	0.95	0.85
hSQ016888	NM_152289	ZNF561	93134	1.77	0.07	2.65	-0.01	1.47	0.43	84.11	95.19	-0.93	-0.68	0.36	29.81	61.08	0.7	0.75	-1.25	66.03	97.01	4.29	3.66	3	0	0	1	0	2	0	0	2	0	0	0	0	0	0	1736	1254	395	1.48	0.25	1.07	0.85
hSQ038775	NM_006415	SPTLC1	10558	1.76	0.07	2.69	-1.89	-0.34	-1.59	11.29	48.94	0.34	-0.28	-2.36	14.69	24.57	0.91	0.83	-0.71	108.64	100	7.14	6.48	1	1	1	0	0	0	0	0	0	0	NA	NA	NA	NA	NA	1320	1422	NA	1.55	-0.62	0.92	0.91
hSQ011027	NM_022070	HEATR6	63897	1.76	0.07	2.7	1.48	2.97	-0.85	58.83	100	0.5	0.18	-0.07	21.69	59.48	0.84	0.84	0.36	108.17	100	5.9	6.25	0	0	0	0	0	2	3	1	0	0	NA	NA	NA	NA	NA	372	3546	NA	1.49	-0.32	1	1.06
hSQ002923	NM_001042618	PARP2	10038	1.76	0.07	2.72	-1.13	0.09	0.08	90.93	100	1.63	1.66	-0.91	14.69	47.91	0.9	0.87	0.09	108.17	100	6.35	6.41	0	0	0	0	0	1	2	1	0	0	NA	NA	NA	NA	NA	106	1713	NA	1.22	0.03	0.96	1.01
hSQ038403	NA	LOC440474	440474	1.76	0.07	2.77	-0.62	0.82	0.12	90.93	100	1.95	2.01	0.47	29.81	60.92	0.84	0.88	-0.05	108.64	100	3.15	3.12	NA	NA	NA	NA	NA	NA	NA	NA	NA	NA	NA	NA	NA	NA	NA	NA	NA	NA	1.44	0.06	1.04	0.99
hSQ012413	NM_033285	TP53INP1	94241	1.76	0.07	2.77	2.4	3.61	-2.17	4.63	16.32	-2.51	-3.56	-0.61	21.69	52.99	0.83	0.76	-1.58	44.12	79.61	4.8	3.84	5	1	1	1	0	0	0	0	0	0	1	0	0	1	0	4506	723	360	1.22	-1.04	0.91	0.8
hSQ034325	NM_018062	FANCL	55120	1.76	0.07	2.78	-1.91	-0.56	-0.02	92.38	100	1.2	1.19	-3.16	9.63	17.97	0.93	0.88	-0.18	108.64	100	6.23	6.08	0	0	0	0	0	1	1	0	1	0	0	0	0	0	0	520	1128	66	1.36	-0.01	0.94	0.98
hSQ036961	NA	FBRS	64319	1.76	0.07	2.8	-0.55	0.8	-0.02	92.38	100	0.2	0.19	-0.21	21.69	58.17	0.86	0.85	-0.71	108.64	100	6.57	6.15	NA	NA	NA	NA	NA	NA	NA	NA	NA	NA	NA	NA	NA	NA	NA	NA	NA	NA	1.35	-0.01	0.99	0.94
hSQ014939	NA	DKFZP564M1416	25869	1.76	0.07	2.83	0.8	2.26	-1.25	25.69	75.59	-0.95	-1.52	0.11	29.81	60.57	0.86	0.86	0.13	108.17	100	6.44	6.51	NA	NA	NA	NA	NA	NA	NA	NA	NA	NA	NA	NA	NA	NA	NA	NA	NA	NA	1.46	-0.57	1	1.01
hSQ019273	NM_015341	NCAPH	23397	1.75	0.07	2.91	0.88	2.52	-0.9	58.83	100	2.52	2.16	-1.04	14.69	45.74	0.93	0.89	0.44	108.17	100	8.56	8.88	0	2	0	0	0	0	1	0	0	0	0	0	0	0	0	2185	2226	84	1.64	-0.36	0.96	1.04
hSQ008398	NM_006626	ZBTB6	10773	1.75	0.07	2.99	1.94	3.57	-0.38	92.38	100	0.37	0.1	3.75	7.47	13.52	0.31	0.56	-0.81	108.64	100	5.62	5.11	3	1	1	1	0	0	0	0	0	0	0	0	0	0	0	2742	1275	89	1.63	-0.28	1.83	0.91
hSQ028604	NM_003852	TRIM24	8805	1.75	0.07	3.01	-0.72	0.79	-0.75	74.83	100	-0.2	-0.52	-0.82	19.17	49.61	0.92	0.89	-0.25	108.64	100	8.01	7.82	0	0	0	0	0	0	2	0	0	0	0	0	0	0	0	634	3051	215	1.51	-0.32	0.97	0.98
hSQ026821	NM_006963	ZNF22	7570	1.75	0.07	3.03	-0.4	0.92	0.28	84.11	100	1.16	1.3	1	28.01	57.19	0.47	0.6	-0.05	108.64	100	5.19	5.15	1	0	0	0	0	0	0	0	0	0	0	0	0	0	0	1282	675	594	1.32	0.14	1.29	0.99
hSQ000253	NM_052911	ESCO1	114799	1.75	0.07	3.04	-0.42	0.93	-0.37	92.38	100	0.33	0.16	-0.31	21.69	57.11	0.91	0.89	-0.24	108.64	100	4.49	4.35	0	0	0	0	0	0	2	0	0	0	0	0	0	0	0	1042	2523	934	1.35	-0.17	0.98	0.97
hSQ034414	NA	RP11-483I13.1	285622	1.75	0.07	3.06	-0.91	0.17	-0.41	92.38	100	-0.56	-0.76	0.72	29.81	59.75	0.71	0.77	0.1	108.17	100	4.18	4.23	NA	NA	NA	NA	NA	NA	NA	NA	NA	NA	NA	NA	NA	NA	NA	NA	NA	NA	1.08	-0.2	1.08	1.01
hSQ022844	NM_002162	ICAM3	3385	1.75	0.07	3.06	0.61	1.93	0.31	84.11	99.76	-2.22	-2.06	-1.11	14.69	44.41	0.9	0.86	-0.03	108.64	100	3.49	3.47	0	0	0	0	0	0	0	0	0	0	NA	NA	NA	NA	NA	79	1644	NA	1.32	0.15	0.96	0.99
hSQ012849	NM_144582	TEX261	113419	1.74	0.07	3.08	0.54	2.12	-0.05	92.38	100	1.95	1.92	0.46	29.81	60.95	0.78	0.81	-0.15	108.64	100	4.57	4.46	4	3	1	1	0	0	0	0	0	0	0	0	0	0	0	2660	591	114	1.57	-0.03	1.04	0.98
hSQ024369	NM_033420	C19orf6	91304	1.74	0.07	3.13	0.3	1.53	-0.37	92.38	100	1.47	1.27	-1.69	14.69	34.17	0.93	0.88	-0.77	108.64	100	4.43	4.04	1	1	1	0	0	0	0	0	0	0	0	0	0	0	0	1235	1227	146	1.23	-0.2	0.95	0.91
hSQ034419	NM_006577	B3GNT2	10678	1.74	0.07	3.15	0.69	2.06	-1.56	11.29	50.97	-1.19	-1.77	0.22	29.81	60.93	0.81	0.81	-0.48	108.64	100	4.8	4.45	1	1	0	0	0	1	1	1	0	0	0	0	0	0	0	1315	1194	238	1.37	-0.58	1.01	0.93
hSQ042727	NM_001039492	FHL2	2274	1.74	0.07	3.18	2.02	3.38	-1.04	35.24	90.92	-1.06	-1.62	-1.35	14.69	40.07	0.9	0.86	-0.11	108.64	100	5.63	5.53	2	0	0	0	0	0	0	0	0	0	0	1	0	0	0	455	840	159	1.36	-0.56	0.96	0.98
hSQ029136	NM_020657	ZNF304	57343	1.74	0.07	3.29	-0.65	0.89	-0.14	92.38	100	-0.47	-0.53	1.6	22.99	48.29	0.77	0.81	-1.36	56.69	91.77	5.47	4.94	0	3	0	0	0	0	0	0	0	0	0	0	0	0	0	2046	1980	286	1.53	-0.06	1.06	0.9
hSQ006947	NM_003321	TUFM	7284	1.74	0.07	3.3	0.94	2.15	0.04	90.93	100	1.67	1.69	-1.71	14.69	33.74	0.97	0.94	0.31	108.17	100	8.17	8.47	0	0	0	0	0	0	0	0	0	0	0	0	0	0	0	184	1368	53	1.21	0.03	0.96	1.04
hSQ039733	NM_001093771	TXNRD1	7296	1.73	0.07	3.33	-1.63	-0.34	-1.06	35.24	89.38	-0.5	-1.03	-1.98	14.69	29.52	0.92	0.87	-1.32	59.85	93.89	7.66	6.85	1	1	1	0	0	2	1	1	2	1	NA	NA	NA	NA	NA	1863	1950	NA	1.29	-0.53	0.95	0.89
hSQ000736	NM_018373	SYNJ2BP	55333	1.72	0.07	3.59	-1.64	-0.29	-0.96	43.3	96.12	-0.44	-0.99	-0.51	21.69	54.46	0.93	0.89	0.09	108.17	100	4.09	4.16	0	1	0	0	0	0	0	0	0	0	0	0	0	0	0	834	438	82	1.35	-0.55	0.96	1.02
hSQ007800	NM_001029939	ZFAT	57623	1.72	0.07	3.75	0.85	2.28	-0.29	92.38	100	1.55	1.4	-1.16	14.69	43.45	0.92	0.89	-0.26	108.64	100	7.31	7.14	3	1	0	0	0	1	1	0	1	0	0	0	0	0	0	2789	2541	138	1.43	-0.15	0.97	0.98
hSQ028848	NM_015976	SNX7	51375	1.71	0.07	3.85	-2.15	-0.68	-1.4	15.82	63.65	1	0.48	-1.44	14.69	38.38	0.91	0.88	0.22	108.17	100	4.13	4.25	0	0	0	0	0	1	1	1	0	0	0	0	0	0	0	367	1164	267	1.47	-0.52	0.97	1.03
hSQ012094	NM_015383	NBPF14	25832	1.71	0.07	3.9	-1.24	-0.09	-0.49	92.38	100	0.06	-0.23	-1.05	14.69	45.48	0.86	0.79	-0.81	108.64	100	4.63	4.15	0	0	0	0	0	3	3	3	0	0	NA	NA	NA	NA	NA	905	2766	NA	1.15	-0.29	0.93	0.9
hSQ023696	NM_002634	PHB	5245	1.71	0.07	3.97	0.18	1.52	-0.15	92.38	100	2.13	2.06	-2.18	14.69	26.8	0.96	0.91	-0.44	108.64	100	6.81	6.49	0	1	0	0	0	1	0	0	1	0	0	0	0	0	0	934	819	73	1.33	-0.07	0.95	0.95
hSQ041852	NM_152737	RNF182	221687	1.7	0.07	4.02	1.06	2.76	-0.6	91.91	100	-0.8	-1.05	2.15	21.69	38.21	0.5	0.74	0.41	108.17	100	3.18	3.43	0	0	0	0	0	0	2	0	0	0	1	0	0	0	0	2141	744	418	1.7	-0.25	1.49	1.08
hSQ029145	NM_001079537	TRAPPC6B	122553	1.7	0.07	4.14	0.12	1.48	0.02	90.93	100	0.22	0.23	-0.17	21.69	58.6	0.88	0.87	-0.07	108.64	100	3.8	3.75	2	0	0	0	0	0	0	0	0	0	0	0	0	0	0	2537	477	335	1.36	0.01	0.99	0.99
hSQ008205	NM_002904	RDBP	7936	1.7	0.07	4.17	0.51	1.59	-0.81	65.69	100	1.04	0.53	-2.48	14.69	23.27	0.96	0.92	0.61	108.17	100	6.1	6.51	0	2	0	0	0	1	1	1	0	0	0	0	0	0	0	214	1143	204	1.09	-0.51	0.96	1.07
hSQ003639	NM_178815	ARL5B	221079	1.7	0.07	4.17	0.28	1.86	-0.43	92.38	100	-0.2	-0.45	1.04	27.27	56.68	0.8	0.89	0.14	108.17	100	4.19	4.31	5	1	1	0	0	0	0	0	0	0	0	0	0	0	0	2795	540	254	1.57	-0.25	1.1	1.03
hSQ030725	NM_001018037	VPS13A	23230	1.7	0.07	4.18	-0.04	1.23	-0.32	92.38	100	-1.43	-1.65	-0.29	21.69	57.31	0.9	0.89	-0.57	108.64	100	3.57	3.33	0	0	0	0	0	3	4	2	1	1	0	0	0	0	0	1475	9408	260	1.28	-0.22	0.99	0.93
hSQ033815	NM_001102559	PPAPDC1B	84513	1.7	0.07	4.19	-0.43	0.94	-0.23	92.38	100	-1.5	-1.61	1.19	26.68	54.88	0.74	0.77	0.09	108.17	100	3.77	3.81	0	0	0	0	0	1	1	1	0	0	NA	NA	NA	NA	NA	1312	795	NA	1.37	-0.11	1.05	1.01
hSQ002536	NM_024792	FAM57A	79850	1.69	0.07	4.37	3.83	5.53	-5.11	0	2.04	1.96	-0.28	-4.6	9.63	14.66	0.89	0.75	-1.31	59.85	94.26	4.54	3.78	1	1	1	0	0	1	0	0	0	0	NA	NA	NA	NA	NA	1264	774	NA	1.7	-2.24	0.84	0.83
hSQ008866	NM_022720	DGCR8	54487	1.69	0.07	4.4	-0.07	1.38	0.72	74.83	83.17	0.2	0.52	0.06	29.81	60.35	0.77	0.77	0.06	108.17	100	4.71	4.75	1	1	0	0	0	1	2	1	1	1	0	0	0	0	0	1767	2322	350	1.45	0.32	1	1.01
hSQ004198	NM_001077204	CSPP1	79848	1.69	0.07	4.44	-1.6	-0.52	0.61	84.11	87.69	0.51	0.79	1.27	26.28	53.74	0.63	0.74	0.19	108.17	100	4.64	4.81	1	1	1	0	0	0	0	0	0	0	NA	NA	NA	NA	NA	666	3771	NA	1.08	0.28	1.17	1.04
hSQ017826	NM_207318	CXorf39	139231	1.69	0.07	4.47	-0.44	1.74	-0.81	65.69	100	1.63	1.08	1.03	27.27	56.81	0.8	0.87	0.18	108.17	100	5.26	5.48	1	1	1	0	0	0	0	0	0	0	0	0	0	0	0	1666	1167	166	2.18	-0.55	1.08	1.04
hSQ023035	NM_203298	CHCHD1	118487	1.68	0.07	4.5	1.44	2.92	-1.27	21.42	73.47	0.62	-0.03	-2.7	14.69	21.16	0.93	0.85	-0.01	108.64	100	3.19	3.18	0	0	0	0	0	0	0	0	0	0	NA	NA	NA	NA	NA	184	357	NA	1.49	-0.65	0.91	1
hSQ004884	NM_001025072	C3orf17	25871	1.68	0.13	4.57	0.8	2.06	0.1	90.93	100	1.99	2.03	0.79	29.5	59.21	0.75	0.79	-0.58	108.64	100	5.21	4.87	3	1	1	1	1	1	0	0	1	0	0	0	0	0	0	3089	1296	318	1.26	0.04	1.05	0.93
hSQ030022	NM_004869	VPS4B	9525	1.68	0.13	4.59	2.09	3.42	-2.42	2.6	8.38	-0.09	-1.07	0.8	29.5	59.17	0.81	0.84	-0.36	108.64	100	7.45	7.04	2	1	1	0	0	0	0	0	0	0	0	0	0	0	0	1781	1335	260	1.33	-0.98	1.03	0.95
hSQ033045	NM_012238	SIRT1	23411	1.68	0.13	4.59	0.37	1.89	-0.38	92.38	100	1.78	1.56	-0.87	19.17	48.61	0.94	0.92	-0.39	108.64	100	7.65	7.32	1	1	0	1	0	0	1	0	0	0	0	0	0	0	0	1791	2244	53	1.52	-0.22	0.97	0.96
hSQ024797	NM_005786	TSHZ1	10194	1.68	0.13	4.63	0.93	2.37	-0.18	92.38	100	0.77	0.68	-0.84	19.17	49.24	0.92	0.9	-0.37	108.64	100	5.39	5.05	1	1	1	0	0	0	2	0	0	0	1	0	0	0	0	1304	3099	563	1.44	-0.09	0.98	0.94
hSQ012335	NM_007219	RNF24	11237	1.68	0.13	4.63	0.92	2.74	0.44	84.11	94.64	-1.17	-0.89	0.15	29.81	60.73	0.83	0.84	-0.23	108.64	100	4.93	4.74	1	0	0	0	0	1	2	1	1	1	0	0	0	0	0	980	447	252	1.81	0.28	1.01	0.96
hSQ003246	NM_014774	KIAA0494	9813	1.68	0.13	4.69	1.87	3.52	-0.53	92.38	100	-0.35	-0.6	-0.23	21.69	57.99	0.89	0.88	-0.51	108.64	100	3.24	2.99	4	1	0	1	0	0	0	0	0	0	0	0	0	0	0	3300	1488	977	1.65	-0.25	0.99	0.92
hSQ019650	NM_015666	GTPBP5	26164	1.67	0.13	4.76	2.11	4.02	0.15	90.93	100	1.25	1.32	-2.62	14.69	21.92	0.91	0.88	-0.48	108.64	100	5.79	5.41	1	2	1	0	0	0	0	0	0	0	NA	NA	NA	NA	NA	1677	1221	NA	1.91	0.06	0.96	0.93
hSQ023756	NM_004422	DVL2	1856	1.67	0.13	4.76	-0.03	1.82	-0.62	91.61	100	-0.22	-0.5	-0.83	19.17	49.31	0.87	0.85	-0.91	108.64	100	6.52	5.8	1	2	0	0	0	1	1	0	0	0	0	0	0	0	0	523	2211	282	1.84	-0.28	0.97	0.89
hSQ039012	NM_016060	MED31	51003	1.67	0.13	4.77	-1.15	0.1	-0.05	92.38	100	1.46	1.44	-0.36	21.69	56.51	0.94	0.92	0.63	108.17	100	4.79	5.35	0	0	0	0	0	0	0	0	0	0	0	0	0	0	0	1154	396	106	1.25	-0.02	0.98	1.12
hSQ030425	NM_001098477	GRSF1	2926	1.67	0.13	4.78	2.13	3.77	-0.53	92.38	100	2.36	2.07	-1.61	14.69	35.46	0.98	0.94	0.1	108.17	100	7.92	8.05	4	2	1	0	0	2	0	0	2	0	0	0	0	0	0	5105	957	405	1.64	-0.29	0.96	1.02
hSQ025005	NM_006572	GNA13	10672	1.67	0.13	4.82	-0.58	0.73	-0.93	52.46	98.25	0.57	0.16	1.21	26.68	54.54	0.77	0.8	-0.27	108.64	100	4.9	4.71	4	1	0	2	0	0	0	0	0	0	NA	NA	NA	NA	NA	3541	1134	NA	1.31	-0.41	1.04	0.96
hSQ002934	NM_021982	SEC24A	10802	1.67	0.13	4.83	-0.74	0.7	-0.28	92.38	100	-1.02	-1.17	0.65	29.81	60.22	0.8	0.84	0.7	108.17	100	6.46	7.13	0	1	0	0	0	3	1	1	0	0	0	0	0	0	0	2816	3282	288	1.44	-0.14	1.05	1.1
hSQ038841	NM_018257	PCMTD2	55251	1.67	0.13	4.83	1.34	2.45	-1.05	35.24	89.95	-0.33	-0.84	-0.47	21.69	55.08	0.81	0.78	-0.36	108.64	100	3.78	3.61	2	0	0	0	0	0	0	0	0	0	0	0	0	0	0	2440	1086	127	1.11	-0.51	0.96	0.95
hSQ042526	NM_173074	PIGF	5281	1.67	0.13	4.89	-0.67	0.73	-0.05	92.38	100	0.84	0.81	0.98	28.01	57.37	0.79	0.86	0.43	108.17	100	3.76	3.99	0	0	0	0	0	1	1	1	0	0	0	0	0	0	0	347	621	164	1.4	-0.03	1.08	1.06
hSQ028332	NM_012287	CENTB2	23527	1.67	0.13	4.91	-1.06	0.19	-0.53	92.38	100	-1.14	-1.45	-2.05	14.69	28.56	0.96	0.91	-0.82	108.64	100	7.32	6.84	3	1	1	1	1	1	0	0	0	0	0	0	0	0	0	4578	2337	176	1.25	-0.31	0.95	0.93
hSQ038887	NA	TncRNA	283131	1.67	0.13	4.92	-0.23	1.46	0.86	65.69	76.85	-0.59	-0.16	0.24	29.81	60.97	0.45	0.48	0.14	108.17	100	2.23	2.3	NA	NA	NA	NA	NA	NA	NA	NA	NA	NA	NA	NA	NA	NA	NA	NA	NA	NA	1.69	0.43	1.08	1.03
hSQ005040	NA	LOC283970	283970	1.67	0.13	4.95	0.74	1.87	0.23	90.93	100	-1.44	-1.31	-0.17	21.69	58.57	0.7	0.69	-0.41	108.64	100	3.57	3.31	NA	NA	NA	NA	NA	NA	NA	NA	NA	NA	NA	NA	NA	NA	NA	NA	NA	NA	1.13	0.13	0.98	0.93
hSQ045120	NM_002834	PTPN11	5781	1.67	0.13	4.96	0.66	2.6	-1.13	30.1	84.68	1.36	0.75	-1.34	14.69	40.22	0.97	0.93	0.14	108.17	100	5.81	5.97	3	2	1	0	0	0	0	0	0	0	0	0	0	0	0	4120	1782	380	1.94	-0.6	0.95	1.03
hSQ006023	NM_015983	UBE2D4	51619	1.67	0.13	4.98	0.53	1.62	-0.12	92.38	100	0.37	0.3	1.86	22.31	43.68	0.24	0.54	0.27	108.17	100	2.47	2.6	2	1	1	0	0	1	0	0	0	0	0	0	0	0	0	869	444	85	1.09	-0.07	2.22	1.05
hSQ034264	NM_012255	XRN2	22803	1.67	0.13	5	-0.4	1.06	-0.01	92.38	100	0.78	0.78	1.24	26.28	54.06	0.88	0.9	0.32	108.17	100	7.96	8.22	0	0	0	0	0	2	0	0	0	0	0	0	0	0	0	487	2853	95	1.46	0	1.02	1.03
hSQ027076	NM_001080469	FBXO46	23403	1.66	0.13	5.01	0.77	2.56	-0.09	92.38	100	0.2	0.15	-1.43	14.69	38.51	0.86	0.79	-1.01	108.17	100	5.07	4.5	0	0	0	0	0	1	2	0	1	0	0	0	0	0	0	1055	1812	123	1.79	-0.04	0.92	0.89
hSQ033016	NM_016001	UTP18	51096	1.66	0.13	5.02	0.41	2.09	-0.79	65.69	100	2.15	1.81	-0.63	21.69	52.64	0.96	0.94	-0.01	108.64	100	7.37	7.36	0	0	0	0	0	2	1	1	1	1	NA	NA	NA	NA	NA	162	1671	NA	1.68	-0.34	0.98	1
hSQ012391	NM_005030	PLK1	5347	1.66	0.13	5.04	-0.84	0.3	0.54	84.11	90.53	0.64	0.83	-0.63	21.69	52.66	0.91	0.89	-0.26	108.64	100	7.31	7.12	0	0	0	0	0	0	1	0	0	0	0	0	0	0	0	305	1812	53	1.14	0.19	0.98	0.97
hSQ026667	NM_001011667	CHCHD7	79145	1.66	0.13	5.04	-0.87	0.27	-0.2	92.38	100	1.81	1.73	-0.37	21.69	56.45	0.77	0.76	-0.74	108.64	100	3.93	3.52	2	0	0	0	0	0	0	0	0	0	1	1	1	0	0	1311	246	171	1.14	-0.08	0.99	0.9
hSQ018339	NM_014967	MTMR15	22909	1.66	0.13	5.07	-0.33	0.73	-0.72	84.11	100	-0.8	-1.11	-1.44	14.69	38.47	0.87	0.81	-0.73	108.64	100	3.96	3.57	1	1	1	0	0	1	1	0	1	0	0	0	0	0	0	1543	3054	238	1.06	-0.31	0.93	0.9
hSQ033447	NM_024579	C1orf54	79630	1.66	0.13	5.1	0.44	2.26	-0.18	92.38	100	-0.02	-0.12	0.4	29.81	61.04	0.64	0.69	0.3	108.17	100	3.66	3.87	0	0	0	0	0	1	1	1	0	0	NA	NA	NA	NA	NA	85	396	NA	1.82	-0.1	1.09	1.06
hSQ020499	NM_003156	STIM1	6786	1.66	0.13	5.21	2.76	4.2	-1.49	13.85	56.31	-0.6	-1.27	-1.88	14.69	31.13	0.94	0.9	0.08	108.17	100	6.5	6.56	1	2	0	0	0	0	0	0	0	0	0	0	0	0	0	1411	2058	568	1.44	-0.67	0.96	1.01
hSQ011050	NM_021994	ZNF277::ZNF277P	11179	1.65	0.13	5.27	-0.8	0.9	0.01	90.93	100	-0.36	-0.36	2.07	21.91	39.68	0.53	0.75	-0.15	108.64	100	6.08	5.98	0	0	0	0	0	1	1	1	0	0	0	0	0	0	0	1205	1353	129	1.7	0.01	1.41	0.98
hSQ039035	NM_006296	VRK2	7444	1.65	0.13	5.4	-1.34	-0.06	0	90.93	100	1.25	1.25	-1.87	14.69	31.25	0.93	0.88	-0.5	108.64	100	7.05	6.68	0	0	0	0	0	0	0	0	0	0	0	0	0	0	0	175	1527	289	1.28	0	0.95	0.95
hSQ004955	NM_012068	ATF5	22809	1.65	0.13	5.41	-1.1	0.18	0.11	90.93	100	-0.28	-0.22	0.54	29.81	60.72	0.67	0.7	-0.99	108.61	100	4.7	3.94	0	0	0	0	0	0	0	0	0	0	0	1	0	0	0	842	849	317	1.28	0.06	1.05	0.84
hSQ044370	NM_012112	TPX2	22974	1.64	0.13	5.6	-1.35	-0.28	0.35	84.11	98.54	0.38	0.55	-1.83	14.69	31.78	0.95	0.91	-0.28	108.64	100	9.09	8.69	0	1	0	0	0	2	3	2	0	0	0	0	0	0	0	720	2244	698	1.07	0.16	0.96	0.95
hSQ003919	NM_032740	SFT2D3	84826	1.64	0.13	5.62	2.4	4.16	-1.5	11.29	55.51	0.07	-0.77	-0.79	19.17	50.03	0.54	0.43	-1.66	37.98	75.27	4.85	3.86	4	1	1	2	1	0	2	0	0	0	1	0	0	0	0	1655	648	506	1.77	-0.84	0.8	0.8
hSQ037222	NM_021649	TICAM2	353376	1.64	0.13	5.63	0.61	2.22	-0.81	65.69	100	-1.84	-2.2	1.7	22.99	46.63	0.73	0.8	-0.79	108.64	100	5.51	4.98	0	0	0	0	0	1	0	0	1	0	1	1	0	0	0	1898	708	847	1.61	-0.36	1.1	0.9
hSQ019318	NM_024762	ZNF552	79818	1.64	0.13	5.64	-0.36	0.89	-0.06	92.38	100	1.36	1.33	1.92	21.91	42.48	0.46	0.62	0.08	108.17	100	5.54	5.58	0	0	0	0	0	0	0	0	0	0	0	0	0	0	0	956	1224	170	1.25	-0.02	1.35	1.01
hSQ042614	NM_001042552	TATDN3	128387	1.64	0.13	5.69	0.52	2	-0.3	92.38	100	2.3	2.1	0.17	29.81	60.78	0.91	0.92	0.34	108.17	100	3.49	3.68	0	0	0	0	0	1	0	0	0	0	0	0	0	0	0	1469	825	79	1.48	-0.2	1	1.05
hSQ039089	NM_004996	ABCC1	4363	1.63	0.13	5.84	0.17	1.85	-0.48	92.38	100	-0.87	-1.23	1.02	27.27	57.01	0.83	0.88	-0.28	108.64	100	6.18	5.96	0	0	0	0	0	2	4	1	0	0	0	0	0	0	0	1792	4596	175	1.68	-0.36	1.05	0.96
hSQ036341	NM_004044	ATIC	471	1.63	0.13	5.86	1.24	2.92	-0.1	92.38	100	2.5	2.46	-1.48	14.69	37.65	0.98	0.95	0.3	108.17	100	11.95	12.3	0	0	0	0	0	1	0	0	0	0	NA	NA	NA	NA	NA	99	1779	NA	1.68	-0.05	0.97	1.03
hSQ027327	NM_024329	EFHD2	79180	1.63	0.13	5.87	0.48	1.65	-0.96	52.46	96.45	-0.05	-0.51	-0.37	21.69	56.36	0.92	0.91	0.5	108.17	100	3.73	4.02	2	2	0	1	0	0	0	0	0	0	NA	NA	NA	NA	NA	1614	723	NA	1.17	-0.46	0.99	1.08
hSQ024286	NM_014612	FAM120A	23196	1.63	0.13	5.88	3.39	4.57	-1.2	25.69	79.37	1.34	0.52	-1.54	14.69	36.56	0.95	0.91	-1.43	51.15	87.69	6.11	5.08	1	0	0	0	0	4	3	2	0	0	NA	NA	NA	NA	NA	1574	3357	NA	1.18	-0.83	0.95	0.83
hSQ013795	NM_001039717	C4orf29	80167	1.63	0.13	5.89	-1.93	-0.34	-1.03	43.3	92.02	-0.35	-0.96	-0.2	21.69	58.34	0.88	0.87	-0.2	108.64	100	4.31	4.22	0	0	0	0	0	0	2	0	0	0	0	0	0	0	0	614	1245	318	1.59	-0.61	0.99	0.98
hSQ034542	NM_001020658	PUM1	9698	1.63	0.13	5.91	0.84	1.95	-0.03	92.38	100	0.99	0.98	0.58	29.81	60.57	0.76	0.78	-0.99	108.61	100	6.77	6.24	1	0	0	0	0	3	2	1	2	1	0	0	0	0	0	1705	3567	113	1.11	-0.01	1.02	0.92
hSQ043241	NM_000671	ADH5	128	1.63	0.13	5.92	-1.1	0.01	0.53	84.11	91.17	0.82	1.11	-2.9	14.69	19.57	0.97	0.91	-0.03	108.64	100	8.37	8.35	1	1	1	0	0	2	0	0	0	0	0	0	0	0	0	1436	1125	80	1.11	0.28	0.94	1
hSQ023178	NM_001038707	CDC42SE1	56882	1.63	0.13	6.02	1.14	2.46	-0.98	43.3	95.32	1.26	0.75	0.58	29.81	60.56	0.79	0.82	0.14	108.17	100	4.48	4.58	2	2	0	0	0	0	0	0	0	0	0	1	0	0	0	2373	240	570	1.32	-0.51	1.04	1.02
hSQ002463	NM_017768	LRRC40	55631	1.63	0.13	6.03	1.11	2.88	-0.38	92.38	100	2.1	1.91	-0.13	21.69	59.01	0.92	0.92	1.03	108.17	100	7.45	8.48	0	0	0	0	0	0	1	0	0	0	0	0	0	0	0	986	1809	52	1.77	-0.19	0.99	1.14
hSQ023049	NM_005935	AFF1	4299	1.63	0.13	6.05	0.46	1.88	-0.57	92.3	100	-0.98	-1.23	-1.37	14.69	39.68	0.97	0.92	-1.35	56.69	91.97	6.15	5.3	8	3	2	1	0	5	2	1	0	0	0	0	0	0	0	5338	3633	407	1.42	-0.25	0.95	0.86
hSQ033040	NM_017750	RETSAT	54884	1.63	0.13	6.1	1.01	2.19	0.27	90.93	100	-0.39	-0.22	0.22	29.81	60.93	0.78	0.79	0.62	108.17	100	5.75	6.07	0	0	0	0	0	2	2	1	0	0	NA	NA	NA	NA	NA	1143	1833	NA	1.18	0.17	1.02	1.06
hSQ007632	NM_016551	TM7SF3	51768	1.62	0.13	6.12	-2.11	-0.9	-0.61	91.61	100	0.37	0.05	-0.23	21.69	58.05	0.86	0.85	0.39	108.17	100	3.71	3.93	0	1	0	0	0	1	1	1	0	0	NA	NA	NA	NA	NA	760	1713	NA	1.21	-0.32	0.98	1.06
hSQ000698	NM_020992	PDLIM1	9124	1.62	0.13	6.22	0.77	2.18	0.22	90.93	100	0.97	1.11	-1.05	14.69	45.48	0.91	0.88	-0.03	108.64	100	7.19	7.17	1	0	0	0	0	0	0	0	0	0	0	0	0	0	0	350	990	109	1.4	0.14	0.97	1
hSQ039298	NM_001018113	FANCB	2187	1.62	0.13	6.26	-1.5	-0.39	0	92.38	100	0.56	0.56	1.41	25.16	51.59	0.61	0.71	-0.41	108.64	100	5.87	5.56	0	0	0	0	0	1	1	1	0	0	0	0	0	0	0	160	2580	268	1.11	0	1.17	0.95
hSQ025176	NM_001042618	PARP2	10038	1.62	0.13	6.26	-1.11	0.05	-0.08	92.38	100	1.98	1.95	-1.64	14.69	34.99	0.93	0.88	-0.66	108.64	100	6.64	6.2	0	0	0	0	0	1	2	1	0	0	NA	NA	NA	NA	NA	106	1713	NA	1.17	-0.03	0.94	0.93
hSQ033467	NM_004358	CDC25B	994	1.62	0.13	6.34	1.62	2.63	-0.11	92.38	100	-0.36	-0.42	-0.95	14.69	47.24	0.9	0.88	-0.68	108.64	100	6.76	6.21	2	2	1	0	0	0	0	0	0	0	1	1	0	0	0	1151	1701	778	1	-0.06	0.97	0.92
hSQ024688	NM_032848	C12orf52	84934	1.62	0.13	6.34	0.21	1.27	-0.41	92.38	100	2.57	2.38	-0.71	21.69	51.48	0.95	0.93	0.3	108.17	100	4.01	4.2	1	1	0	0	0	0	0	0	0	0	0	0	0	0	0	497	810	468	1.06	-0.19	0.98	1.05
hSQ028184	NM_001008392	CTDSPL	10217	1.61	0.13	6.47	2.89	4.13	-1.75	7.95	38.02	0.93	0.09	-0.98	14.69	46.7	0.82	0.78	0.01	108.17	100	4.14	4.15	3	3	1	2	0	0	1	0	0	0	NA	NA	NA	NA	NA	3601	831	NA	1.24	-0.84	0.95	1
hSQ045426	NM_022483	C5orf28	64417	1.61	0.13	6.54	1.72	3.19	-1.49	13.85	56.43	-0.34	-1.01	0.6	29.81	60.47	0.66	0.72	-0.59	108.64	100	3.47	3.21	2	1	1	2	1	0	0	0	0	0	0	0	0	0	0	1970	648	318	1.47	-0.67	1.1	0.92
hSQ044651	NM_001098477	GRSF1	2926	1.61	0.13	6.58	2.1	3.69	-0.61	91.61	100	1.76	1.45	-1.24	14.69	41.94	0.95	0.92	-0.21	108.64	100	6.97	6.79	4	2	1	0	0	2	0	0	2	0	0	0	0	0	0	5105	957	405	1.59	-0.31	0.96	0.97
hSQ009389	NA	PTTG3	26255	1.61	0.13	6.61	-1.81	-0.75	0.38	84.11	97.09	0.83	1.01	-1.23	14.69	42.23	0.94	0.9	-0.49	108.64	100	5.32	5	NA	NA	NA	NA	NA	NA	NA	NA	NA	NA	NA	NA	NA	NA	NA	NA	NA	NA	1.06	0.19	0.95	0.94
hSQ003379	NM_003761	VAMP8	8673	1.61	0.13	6.63	-0.69	0.35	0.03	90.93	100	-0.25	-0.23	-2	14.69	29.32	0.93	0.87	0.36	108.17	100	4.42	4.69	0	0	0	0	0	1	1	1	0	0	0	0	0	0	0	314	303	53	1.04	0.02	0.93	1.06
hSQ015905	NM_032276	RHBDD1	84236	1.61	0.13	6.65	0.46	1.6	-1	43.3	93.89	0.92	0.45	-1.08	14.69	44.97	0.89	0.86	-1.68	37.98	73.62	5.8	4.94	3	1	0	0	0	1	0	0	1	0	0	0	0	0	0	1353	948	121	1.14	-0.47	0.96	0.85
hSQ010599	NM_015317	PUM2	23369	1.6	0.13	6.74	-0.31	0.94	0.32	84.11	99.68	-0.02	0.16	-0.68	21.69	51.85	0.9	0.87	-0.32	108.64	100	5.9	5.73	0	0	0	0	0	3	2	2	2	2	NA	NA	NA	NA	NA	2893	3195	NA	1.25	0.17	0.97	0.97
hSQ031525	NM_001008392	CTDSPL	10217	1.6	0.13	6.83	-1.47	-0.1	-2.07	4.63	20.11	0.43	-0.45	-0.36	21.69	56.54	0.79	0.76	0.15	108.17	100	3.73	3.81	3	3	1	2	0	0	1	0	0	0	NA	NA	NA	NA	NA	3601	831	NA	1.37	-0.88	0.97	1.02
hSQ024883	NM_006714	SMPDL3A	10924	1.6	0.13	6.88	-0.94	0.26	-1.3	21.42	71.17	-0.64	-1.28	-0.88	19.17	48.52	0.89	0.84	-0.56	108.64	100	4.15	3.82	1	0	0	1	0	0	0	0	0	0	0	0	0	0	0	309	1362	68	1.2	-0.64	0.94	0.92
hSQ027534	NM_198504	PAQR9	344838	1.6	0.13	6.91	1.55	3.2	-2	4.63	23.7	-1.27	-2.27	-1.3	14.69	40.88	0.75	0.7	-0.64	108.64	100	4.62	4.11	1	1	1	0	0	0	1	0	0	0	NA	NA	NA	NA	NA	969	1134	NA	1.65	-1	0.93	0.89
hSQ035130	NM_001560	IL13RA1	3597	1.6	0.13	6.99	-0.07	1.85	-0.01	92.38	100	-0.53	-0.54	1.22	26.28	54.33	0.83	0.91	0.44	108.17	100	4.16	4.47	0	1	0	0	0	1	1	1	0	0	NA	NA	NA	NA	NA	2678	1284	NA	1.92	-0.01	1.1	1.07
hSQ033141	NM_006415	SPTLC1	10558	1.6	0.13	6.99	-2.57	-1.07	-1.13	30.1	84.61	0.5	-0.21	-1.79	14.69	32.43	0.95	0.88	0.34	108.17	100	6.49	6.78	1	1	1	0	0	0	0	0	0	0	NA	NA	NA	NA	NA	1320	1422	NA	1.5	-0.7	0.93	1.04
hSQ041902	NM_024642	GALNT12	79695	1.59	0.13	7.03	-2.76	-0.65	-1.85	5.84	31.93	-2.77	-3.48	-0.26	21.69	57.71	0.81	0.79	-0.39	108.64	100	4.02	3.8	1	1	1	0	0	0	1	0	0	0	NA	NA	NA	NA	NA	984	1746	NA	2.11	-0.7	0.98	0.95
hSQ038927	NM_004219	PTTG1	9232	1.59	0.13	7.11	0.27	2.17	-0.08	92.38	100	1.71	1.67	-1.09	14.69	44.66	0.97	0.94	-1.11	81.59	100	7.12	5.86	0	0	0	0	0	0	1	0	0	0	NA	NA	NA	NA	NA	57	609	NA	1.9	-0.05	0.97	0.82
hSQ023388	NM_006990	WASF2	10163	1.59	0.13	7.13	-0.58	0.78	-1.94	5.14	26.65	0.17	-0.91	-1.59	14.69	35.8	0.86	0.79	-2.14	34.95	50.53	6.26	5.33	4	2	0	0	0	0	1	0	0	0	0	0	0	0	0	2557	1497	216	1.36	-1.09	0.92	0.85
hSQ019399	NM_024824	ZC3H14	79882	1.59	0.13	7.15	-1.95	-0.85	-0.13	92.38	100	1.43	1.37	-0.9	19.17	48.23	0.88	0.85	0.07	108.17	100	6.64	6.69	2	0	0	0	0	2	3	1	0	0	0	0	0	0	0	1757	2211	156	1.1	-0.06	0.97	1.01
hSQ029743	NM_007220	CA5B	11238	1.59	0.13	7.22	-0.73	0.35	-1	43.3	93.8	-1.85	-2.26	1.48	23.79	50.34	0.54	0.7	-0.58	108.64	100	3.54	3.22	4	3	0	2	0	0	0	0	0	0	0	0	0	0	0	4960	954	117	1.08	-0.42	1.31	0.91
hSQ043894	NM_006282	STK4	6789	1.59	0.13	7.24	1.56	2.76	-0.07	92.38	100	0.28	0.23	-0.5	21.69	54.63	0.89	0.87	-0.79	108.64	100	5.51	5.18	4	2	1	1	1	0	0	0	0	0	0	0	0	0	0	4774	1464	90	1.2	-0.05	0.98	0.94
hSQ040330	NM_003288	TPD52L2	7165	1.59	0.13	7.25	1.8	3.08	-1.07	35.24	88.52	0.27	-0.18	-2.64	14.69	21.75	0.97	0.91	-0.33	108.64	100	5.04	4.84	3	1	1	2	1	0	0	0	0	0	0	0	0	0	0	1590	621	129	1.29	-0.45	0.95	0.96
hSQ015117	NM_017908	ZNF446	55663	1.58	0.13	7.34	1.16	2.25	0.23	90.93	100	1.01	1.13	-0.42	21.69	55.79	0.83	0.81	-0.46	108.64	100	5.23	4.95	1	2	1	0	0	0	0	0	0	0	0	0	0	0	0	504	1353	117	1.09	0.12	0.98	0.95
hSQ044185	NM_153335	LYK5	92335	1.58	0.13	7.38	1.11	2.19	-0.8	65.69	100	1.55	1.02	-1.75	14.69	33.13	0.88	0.83	-0.56	108.64	100	6.36	6.07	0	2	0	0	0	1	1	1	0	0	0	0	0	0	0	1447	1047	159	1.08	-0.53	0.95	0.95
hSQ040181	NM_001100164	PHACTR2	9749	1.58	0.13	7.49	-0.95	0.69	-2.3	3.76	11.69	-1.14	-2.02	-1.01	14.69	46.22	0.98	0.95	0.51	108.17	100	3.51	3.78	3	3	1	2	1	1	4	0	1	0	0	0	0	0	0	7496	1938	199	1.64	-0.88	0.97	1.08
hSQ005532	NM_012298	CAND2	23066	1.58	0.13	7.51	-0.35	0.62	-0.21	92.38	100	1.88	1.8	-0.2	21.69	58.27	0.87	0.86	-0.82	108.64	100	6.63	6.29	1	1	1	0	0	0	0	0	0	0	NA	NA	NA	NA	NA	820	3360	NA	0.97	-0.08	0.99	0.95
hSQ023826	NM_004127	GPS1	2873	1.57	0.13	7.67	0.54	1.97	0.11	90.93	100	2.03	2.1	-1.52	14.69	36.95	0.92	0.9	0.46	108.17	100	6.52	6.92	0	0	0	0	0	0	2	0	0	0	NA	NA	NA	NA	NA	343	1476	NA	1.43	0.07	0.98	1.06
hSQ043123	NA	LOC257396	257396	1.57	0.13	7.76	2.64	3.84	-1.11	30.1	86.13	1.27	0.86	-0.01	21.69	59.89	0.76	0.76	-0.23	108.64	100	3.06	2.93	NA	NA	NA	NA	NA	NA	NA	NA	NA	NA	NA	NA	NA	NA	NA	NA	NA	NA	1.2	-0.41	1	0.96
hSQ014347	NM_005796	NUTF2	10204	1.57	0.23	7.9	0.8	2.07	-0.38	92.38	100	2.35	2.14	-0.35	21.69	56.64	0.96	0.94	0.06	108.17	100	4.74	4.79	1	0	0	0	0	1	0	0	1	0	0	0	0	0	0	402	384	99	1.27	-0.22	0.99	1.01
hSQ030884	NM_018952	HOXB6	3216	1.57	0.23	7.93	-1.65	-0.66	0.95	65.69	73.13	2.87	3.27	0.15	29.81	60.73	0.51	0.53	-0.52	108.64	100	3.66	3.36	0	0	0	0	0	0	1	0	0	0	0	0	0	0	0	676	675	325	1	0.39	1.05	0.92
hSQ034448	NA	repname(hSQ034448)	repname(hSQ034448)	1.56	0.23	7.98	0.39	1.65	0.54	84.11	90.54	0.53	0.8	1.36	25.16	52.29	0.07	0.1	0.16	108.17	100	2.7	2.78	NA	NA	NA	NA	NA	NA	NA	NA	NA	NA	NA	NA	NA	NA	NA	NA	NA	NA	1.25	0.27	1.43	1.03
hSQ040013	NM_000666	ACY1	95	1.56	0.23	8	-0.05	1.05	-0.3	92.38	100	-0.32	-0.48	0.2	29.81	60.89	0.81	0.82	0.93	108.17	100	5.16	5.9	0	0	0	0	0	1	3	0	0	0	0	0	0	0	0	126	1227	61	1.1	-0.15	1.01	1.14
hSQ033903	NM_017994	C7orf42	55069	1.56	0.23	8.04	-0.61	0.42	-1.34	15.82	67.88	-0.31	-1.2	-1.11	14.69	44.45	0.91	0.88	-0.79	108.64	100	4.07	3.68	1	1	0	1	0	0	0	0	0	0	0	1	0	0	0	3028	945	264	1.03	-0.89	0.97	0.9
hSQ005248	NM_014521	SH3BP4	23677	1.56	0.23	8.12	1.36	2.7	-0.69	84.11	100	-2.27	-2.66	-0.53	21.69	54.15	0.86	0.83	-0.69	108.64	100	6.12	5.64	0	1	0	0	0	2	3	2	0	0	0	0	0	0	0	1896	2892	393	1.34	-0.39	0.96	0.92
hSQ028227	NM_018087	TMEM48	55706	1.56	0.23	8.15	0.25	1.41	-0.14	92.38	100	1.17	1.11	0.14	29.81	60.71	0.88	0.88	0.3	108.17	100	4.23	4.38	1	0	0	0	0	2	2	2	0	0	1	0	0	0	0	253	2025	241	1.16	-0.06	1.01	1.03
hSQ028665	NM_152444	PTGR2	145482	1.56	0.23	8.21	1.21	2.69	0.3	84.11	100	-0.38	-0.22	0.46	29.81	60.95	0.85	0.87	-0.46	108.64	100	6.55	6.26	0	0	0	0	0	1	2	1	1	1	0	0	0	0	0	1282	1056	197	1.48	0.16	1.02	0.96
hSQ032581	NM_001001664	SPOPL	339745	1.56	0.23	8.23	2.64	4.54	-3.58	0	0.3	-0.39	-2.14	-0.3	21.69	57.18	0.69	0.67	-1.81	34.95	66.52	3.66	2.78	4	4	3	0	0	0	2	0	0	0	0	0	0	0	0	4150	1179	379	1.9	-1.75	0.97	0.76
hSQ019229	NM_032758	PHF5A	84844	1.55	0.23	8.28	0.23	1.3	-0.3	92.38	100	2.7	2.56	-2.09	14.69	27.97	0.96	0.92	0.07	108.17	100	4.34	4.39	0	1	0	0	0	0	0	0	0	0	0	0	0	0	0	680	333	51	1.07	-0.15	0.96	1.01
hSQ043517	NM_019008	SMCR7L	54471	1.55	0.23	8.31	0.28	1.63	-0.15	92.38	100	1.74	1.68	-1.59	14.69	35.77	0.92	0.87	-0.94	108.64	100	5.33	4.91	5	1	0	0	0	0	1	0	0	0	1	1	1	0	0	3808	1392	498	1.35	-0.06	0.95	0.92
hSQ023581	NM_025251	KIAA1688	80728	1.55	0.23	8.34	0.97	2.31	-0.2	92.38	100	0.42	0.34	-0.65	21.69	52.3	0.92	0.89	-1.16	71.06	100	6.17	5.55	1	1	1	0	0	0	0	0	0	0	0	1	0	0	0	1243	3345	555	1.34	-0.09	0.97	0.9
hSQ044002	NM_024544	MUL1	79594	1.55	0.23	8.37	-0.13	0.94	-0.04	92.38	100	1.19	1.17	-2	14.69	29.33	0.93	0.89	-1.35	56.69	92.21	6.8	6.09	2	0	0	0	0	1	1	1	1	1	0	0	0	0	0	1240	1059	137	1.07	-0.02	0.96	0.9
hSQ016741	NM_022480	KLHL25	64410	1.55	0.23	8.48	2.09	3.48	-0.36	92.38	100	1.15	1	-0.19	21.69	58.45	0.88	0.87	-0.18	108.64	100	6.35	6.23	1	1	0	0	0	1	2	1	0	0	0	0	0	0	0	1706	1770	203	1.38	-0.15	0.99	0.98
hSQ028468	NM_024334	TMEM43	79188	1.55	0.23	8.49	0.45	2.66	-0.93	52.46	98.13	-0.12	-0.83	1.3	26.28	53.2	0.72	0.87	-0.34	108.64	100	5.53	5.07	0	2	0	0	0	1	0	0	0	0	0	0	0	0	0	1884	1203	149	2.2	-0.71	1.21	0.92
hSQ045007	NM_015976	SNX7	51375	1.55	0.23	8.51	-0.42	1.07	-1.35	15.82	67.65	1.07	0.36	-0.26	21.69	57.67	0.88	0.88	0.03	108.17	100	4.09	4.11	0	0	0	0	0	1	1	1	0	0	0	0	0	0	0	367	1164	267	1.48	-0.71	0.99	1.01
hSQ043634	NM_014380	NGFRAP1	27018	1.55	0.23	8.51	-0.61	0.54	-0.28	92.38	100	3.09	2.94	-1.69	14.69	34.15	0.98	0.94	-0.58	108.64	100	5.87	5.42	2	0	0	0	0	2	0	0	1	0	1	1	0	0	0	244	336	311	1.15	-0.15	0.96	0.92
hSQ010934	NA	ZNF322A::ZNF322B	79692::387328	1.55	0.23	8.53	-0.54	0.45	-0.5	92.38	100	1.04	0.76	-1.43	14.69	38.49	0.88	0.85	-0.25	108.64	100	4.97	4.77	NA	NA	NA	NA	NA	NA	NA	NA	NA	NA	NA	NA	NA	NA	NA	NA	NA	NA	0.99	-0.28	0.96	0.96
hSQ009459	NM_003761	VAMP8	8673	1.55	0.23	8.53	-0.72	0.46	-0.12	92.38	100	-0.52	-0.58	-2.79	14.69	20.44	0.96	0.9	-0.12	108.64	100	3.85	3.77	0	0	0	0	0	1	1	1	0	0	0	0	0	0	0	314	303	53	1.18	-0.06	0.94	0.98
hSQ031421	NM_153712	TTL	150465	1.55	0.23	8.56	-0.53	0.58	-1.04	35.24	91.07	1.14	0.68	0.41	29.81	61.04	0.75	0.79	-0.26	108.64	100	3.67	3.54	5	5	2	2	2	1	0	0	0	0	0	0	0	0	0	3846	1134	179	1.11	-0.46	1.05	0.96
hSQ034071	NM_014390	SND1	27044	1.55	0.23	8.59	1.04	2.29	-0.52	92.38	100	0.49	0.18	-0.84	19.17	49.21	0.92	0.89	-0.01	108.64	100	10.67	10.66	0	0	0	0	0	5	3	0	1	0	1	0	0	0	0	548	2733	226	1.25	-0.32	0.98	1
hSQ023578	NA	GEMIN5	25929	1.54	0.23	8.62	0.48	1.65	-0.28	92.38	100	0.48	0.3	-0.66	21.69	52.24	0.92	0.9	0.05	108.17	100	9.02	9.04	NA	NA	NA	NA	NA	NA	NA	NA	NA	NA	NA	NA	NA	NA	NA	NA	NA	NA	1.17	-0.18	0.98	1
hSQ029297	NM_002875	RAD51	5888	1.54	0.23	8.69	3.17	4.51	-2.95	1.97	1.16	0.74	-0.85	-3.66	9.63	16.05	0.95	0.83	-2.18	34.95	49.02	7.88	6.26	1	2	1	1	1	0	0	0	0	0	0	0	0	0	0	980	1020	267	1.33	-1.59	0.87	0.79
hSQ002616	NM_001388	DRG2	1819	1.54	0.23	8.71	-1.05	0.03	-1.35	15.82	67.51	1.82	1.24	-1.87	14.69	31.28	0.82	0.73	-0.58	108.64	100	6.06	5.59	0	2	0	0	0	0	0	0	0	0	0	0	0	0	0	738	1095	55	1.08	-0.57	0.89	0.92
hSQ034036	NM_003749	IRS2	8660	1.54	0.23	8.76	0.61	1.8	-0.11	92.38	100	-2.88	-2.96	-0.47	21.69	55.08	0.9	0.88	-1.21	71.06	98.81	7.71	7.03	1	1	0	0	0	2	3	2	0	0	0	0	0	0	0	2467	4017	514	1.19	-0.08	0.98	0.91
hSQ039055	NM_007146	VEZF1	7716	1.54	0.23	8.88	-0.45	0.67	-0.46	92.38	100	0.14	-0.09	0.44	29.81	60.99	0.8	0.81	-0.17	108.64	100	5.3	5.2	1	1	1	0	0	2	0	0	0	0	0	0	0	0	0	2924	1566	143	1.12	-0.23	1.01	0.98
hSQ004313	NM_022779	DDX31	64794	1.53	0.23	8.96	1.01	2.15	-0.24	92.38	100	1.22	1.1	-1.07	14.69	45.04	0.87	0.85	0.22	108.17	100	7.14	7.19	0	0	0	0	0	1	2	1	0	0	0	0	0	0	0	577	2556	152	1.15	-0.12	0.97	1.01
hSQ028442	NM_016486	TMEM69	51249	1.53	0.23	9.25	-1.16	-0.01	-0.5	92.38	100	1.65	1.39	-0.24	21.69	57.93	0.65	0.61	-0.56	108.64	100	5.94	5.55	0	0	0	0	0	1	0	0	0	0	1	2	1	0	0	531	744	196	1.15	-0.26	0.94	0.93
hSQ045285	NM_032663	USP30	84749	1.52	0.23	9.35	1.04	2.11	-0.34	92.38	100	0.18	0.03	0.68	29.81	60.01	0.83	0.85	-0.25	108.64	100	5.9	5.79	0	0	0	0	0	1	1	0	0	0	0	0	0	0	0	446	1527	120	1.07	-0.14	1.03	0.98
hSQ040744	NM_144599	NIPA1	123606	1.52	0.23	9.38	2.86	4.08	-1.1	35.24	87.05	-0.89	-1.37	-0.66	21.69	52.28	0.89	0.83	-0.1	108.64	100	3.45	3.39	4	3	1	0	0	1	3	1	0	0	NA	NA	NA	NA	NA	5548	990	NA	1.22	-0.48	0.93	0.98
hSQ000140	NM_001945	HBEGF	1839	1.52	0.23	9.45	1.62	3.34	-0.93	52.46	98.32	-0.12	-0.58	0	29.81	59.97	0.81	0.81	-0.17	108.64	100	4.85	4.75	0	1	0	0	0	0	0	0	0	0	0	1	0	0	0	1455	627	261	1.72	-0.46	1	0.98
hSQ024124	NM_016143	NSFL1C	55968	1.52	0.23	9.5	1.95	3.05	-0.38	92.38	100	0.57	0.38	-1.53	14.69	36.73	0.92	0.9	-0.3	108.64	100	6.65	6.48	0	1	0	0	0	0	0	0	0	0	0	1	0	0	0	1581	1113	948	1.1	-0.18	0.97	0.97
hSQ039495	NM_015163	TRIM9	114088	1.52	0.23	9.5	-0.55	0.65	-0.01	92.38	100	1.58	1.57	0.25	29.81	61	0.86	0.87	-0.78	108.64	100	6.75	6.27	1	1	0	0	0	1	0	0	0	0	0	0	0	0	0	2026	2133	390	1.2	0	1.01	0.93
hSQ016900	NA	XM_376575	401307	1.52	0.23	9.51	-1.5	-0.5	-1.1	35.24	86.74	0.69	0.23	-1.76	14.69	32.98	0.94	0.89	0.88	108.17	100	3.53	4.01	NA	NA	NA	NA	NA	NA	NA	NA	NA	NA	NA	NA	NA	NA	NA	NA	NA	NA	1	-0.46	0.94	1.14
hSQ036254	NM_000152	GAA	2548	1.52	0.23	9.54	2.28	3.63	-0.24	92.38	100	-0.94	-1.05	0.78	29.71	59.3	0.79	0.84	0.31	108.17	100	5.45	5.67	0	0	0	0	0	1	3	0	0	0	0	0	0	0	0	548	2859	367	1.35	-0.11	1.06	1.04
hSQ020473	NM_001360	DHCR7	1717	1.52	0.23	9.61	-0.8	0.43	-0.94	52.46	97.37	0.66	0.28	-2.19	14.69	26.72	0.89	0.85	-0.03	108.64	100	7.77	7.75	2	0	0	0	0	2	2	1	2	1	0	0	0	0	0	964	1428	273	1.22	-0.38	0.96	1
hSQ014400	NM_014172	PHPT1	29085	1.51	0.23	9.68	-0.47	0.57	0.39	84.11	96.78	1.22	1.41	-0.86	19.17	48.95	0.94	0.91	0.78	108.17	100	4.66	5.05	0	0	0	0	0	0	0	0	0	0	0	1	0	0	0	191	378	327	1.04	0.19	0.97	1.08
hSQ009698	NM_024662	NAT10	55226	1.51	0.23	9.71	-2.43	-0.88	-0.01	92.38	100	0.54	0.53	-1.12	14.69	44.19	0.86	0.8	-0.55	108.64	100	8.55	7.84	0	0	0	0	0	2	2	1	0	0	1	1	1	0	0	718	3078	206	1.55	-0.01	0.94	0.92
hSQ023252	NM_016422	RNF141	50862	1.51	0.23	9.72	3.63	4.72	-2.73	2.12	2.96	0.49	-0.84	0.72	29.81	59.79	0.63	0.7	-0.13	108.64	100	3.01	2.94	1	2	1	0	0	1	0	0	0	0	1	0	0	0	0	3238	693	153	1.09	-1.33	1.1	0.98
hSQ044364	NM_006868	RAB31	11031	1.51	0.23	9.91	-2.18	-0.71	-1.19	25.69	79.67	-0.78	-1.32	0.41	29.81	61.03	0.82	0.88	0.59	108.17	100	3.02	3.28	2	0	0	1	0	2	2	2	0	0	0	0	0	0	0	3225	588	100	1.47	-0.54	1.08	1.09
hSQ029984	NM_018708	FEM1A	55527	1.51	0.23	9.93	1.05	2.27	-0.5	92.38	100	1.61	1.38	-1.11	14.69	44.39	0.94	0.9	-0.37	108.64	100	5.2	4.95	4	1	0	0	0	2	2	1	0	0	0	0	0	0	0	1693	2010	139	1.22	-0.23	0.97	0.95
hSQ003860	NM_198077	C1orf52	148423	1.51	0.23	9.94	-1.17	-0.13	0.05	90.93	100	1.12	1.14	0.92	28.01	58.09	0.85	0.87	-0.05	108.64	100	3.54	3.52	0	1	0	0	0	0	0	0	0	0	NA	NA	NA	NA	NA	656	549	NA	1.04	0.02	1.02	0.99
hSQ032921	NM_013319	UBIAD1	29914	1.51	0.23	9.97	0.88	1.97	-0.27	92.38	100	2.08	1.94	0.16	29.81	60.76	0.86	0.87	0.06	108.17	100	4.87	4.9	1	0	0	1	0	0	2	0	0	0	0	0	0	0	0	150	1017	310	1.09	-0.14	1.01	1.01
hSQ034555	NM_006117	PECI	10455	1.51	0.23	9.98	0.17	1.3	-3.01	1.97	0.84	1.26	-0.4	-1.57	14.69	36.2	0.94	0.86	-1.3	59.85	94.82	5.46	4.62	1	1	1	0	0	1	0	0	0	0	0	0	0	0	0	180	1095	117	1.13	-1.66	0.91	0.85
hSQ037784	NM_015292	FAM62A	23344	1.51	0.23	9.99	1.06	2.42	-0.32	92.38	100	-0.96	-1.13	-1.52	14.69	36.95	0.91	0.87	-0.8	108.64	100	9.02	8.15	1	2	0	0	0	1	3	0	0	0	0	0	0	0	0	806	3315	50	1.36	-0.17	0.95	0.9
hSQ003586	NM_004356	CD81	975	1.5	0.23	10.09	1.32	2.31	0.15	90.93	100	1.6	1.71	-1.84	14.69	31.62	1	0.96	0.94	108.17	100	8.01	8.69	1	0	0	0	0	0	1	0	0	0	0	0	0	0	0	553	711	233	0.99	0.1	0.97	1.08
hSQ021970	NM_033222	PSIP1	11168	1.5	0.23	10.14	-3.03	-2.06	-0.53	92.38	100	0.16	-0.04	-3.28	9.63	17.38	0.96	0.91	0.49	108.17	100	7.13	7.46	0	0	0	0	0	0	0	0	0	0	0	0	0	0	0	1452	1593	309	0.98	-0.19	0.94	1.05
hSQ009895	NA	ncRNA_U28_5	repname(hSQ009895)	1.5	0.23	10.23	-2.48	-1.38	-0.33	92.38	100	2.16	1.89	-0.26	21.69	57.73	0.51	0.48	-0.02	108.64	100	2.08	2.07	NA	NA	NA	NA	NA	NA	NA	NA	NA	NA	NA	NA	NA	NA	NA	NA	NA	NA	1.09	-0.27	0.95	0.99
hSQ023458	NM_002611	PDK2	5164	1.5	0.23	10.24	1.12	2.09	-0.21	92.38	100	0.66	0.54	-0.2	21.69	58.33	0.91	0.9	0.55	108.17	100	5.77	6.12	1	0	0	1	0	0	0	0	0	0	0	0	0	0	0	961	1224	104	0.97	-0.12	0.99	1.06
hSQ005922	NM_052897	MBD6	114785	1.5	0.23	10.34	1.63	3.32	0.08	90.93	100	-0.57	-0.53	0.24	29.81	60.98	0.77	0.78	-0.53	108.64	100	3.83	3.6	1	0	0	0	0	2	1	1	2	1	0	0	0	0	0	914	3012	224	1.7	0.04	1.01	0.94
hSQ023684	NM_022763	FNDC3B	64778	1.49	0.23	10.4	0.5	1.98	-1.11	30.1	85.85	-2.71	-3.42	-0.71	21.69	51.38	0.88	0.85	-1.02	108.17	100	5.97	5.25	2	3	0	0	0	3	2	1	0	0	0	0	0	0	0	3221	3615	54	1.49	-0.71	0.96	0.88
hSQ015642	NM_006738	AKAP13	11214	1.49	0.23	10.46	0.63	2.01	-0.41	92.38	100	-1.35	-1.58	0.8	29.5	59.18	0.76	0.86	0.01	108.17	100	5.79	5.81	5	6	2	1	0	2	2	0	0	0	0	0	0	0	0	4678	8454	170	1.38	-0.23	1.14	1
hSQ032404	NM_020156	C1GALT1	56913	1.49	0.23	10.49	-0.55	0.67	0.15	90.93	100	-1.6	-1.51	1.62	22.99	48.02	0.79	0.86	0.37	108.17	100	3.98	4.28	1	0	0	1	0	0	0	0	0	0	0	0	0	0	0	621	1092	62	1.22	0.08	1.09	1.08
hSQ011079	NM_018120	ARMC1	55156	1.49	0.23	10.62	-1.69	0.01	-1.01	43.3	93.16	-0.66	-1.57	1.09	27.27	56.15	0.82	0.87	-0.18	108.64	100	4.84	4.6	1	1	1	0	0	0	0	0	0	0	0	0	0	0	0	1553	849	235	1.7	-0.91	1.06	0.95
hSQ043124	NA	LOC257396	257396	1.49	0.23	10.64	2.71	3.87	-1.35	15.82	67.45	1.72	1.15	1.01	27.27	57.05	0.71	0.76	-0.13	108.64	100	3.11	3.04	NA	NA	NA	NA	NA	NA	NA	NA	NA	NA	NA	NA	NA	NA	NA	NA	NA	NA	1.16	-0.57	1.07	0.98
hSQ017379	NM_021982	SEC24A	10802	1.49	0.23	10.67	-0.35	0.9	-0.41	92.38	100	-0.65	-0.82	-0.21	21.69	58.2	0.85	0.84	0.72	108.17	100	7.24	7.61	0	1	0	0	0	3	1	1	0	0	0	0	0	0	0	2816	3282	288	1.25	-0.17	0.99	1.05
hSQ039948	NM_014317	PDSS1	23590	1.49	0.23	10.67	-0.51	0.51	-0.01	92.38	100	1.71	1.7	-0.62	21.69	52.8	0.79	0.76	0.03	108.17	100	4.6	4.61	0	1	0	0	0	0	0	0	0	0	NA	NA	NA	NA	NA	322	1248	NA	1.02	-0.01	0.96	1
hSQ014243	NM_024313	NOL12	79159	1.49	0.23	10.68	0.32	1.43	0.06	90.93	100	2.97	3.02	-0.61	21.69	52.98	0.91	0.88	0.44	108.17	100	4.5	4.79	3	7	1	0	0	0	0	0	0	0	0	0	0	0	0	2141	642	56	1.11	0.04	0.98	1.07
hSQ012984	NM_133325	PHF10	55274	1.48	0.23	10.78	0.04	1.22	-1.07	35.24	88.62	2.11	1.67	-2.57	14.69	22.35	0.94	0.89	-0.21	108.64	100	5.99	5.8	0	0	0	0	0	0	1	0	0	0	0	0	0	0	0	98	1227	221	1.18	-0.44	0.94	0.97
hSQ042853	NA	mtRNA_ND4L	repname(hSQ042853)	1.48	0.23	10.83	-1.05	0.01	0.1	90.93	100	1.31	1.39	0.12	29.81	60.6	0.27	0.23	0.32	108.17	100	3.42	3.65	NA	NA	NA	NA	NA	NA	NA	NA	NA	NA	NA	NA	NA	NA	NA	NA	NA	NA	1.06	0.08	0.86	1.07
hSQ033669	NM_144710	2009-09-10	151011	1.48	0.23	10.9	-0.8	1.08	-0.65	90.93	100	-1.5	-1.96	3.19	8.94	20.49	0.76	0.88	0.03	108.17	100	5.96	5.99	2	1	1	2	1	0	0	0	0	0	0	0	0	0	0	1510	1365	379	1.88	-0.46	1.15	1.01
hSQ028779	NM_016319	COPS7A	50813	1.48	0.23	10.9	-0.11	1.82	-0.09	92.38	100	0.93	0.86	1.99	21.91	41.18	0.74	0.88	0.9	108.17	100	4.3	5.17	0	0	0	0	0	0	0	0	0	0	0	0	0	0	0	823	828	141	1.93	-0.08	1.19	1.2
hSQ017277	NM_032039	ITFG3	83986	1.48	0.23	10.92	1.64	2.95	-0.32	92.38	100	-0.99	-1.16	0.73	29.81	59.71	0.83	0.87	-0.18	108.64	100	4.27	4.17	1	1	1	0	0	1	1	0	0	0	0	0	0	0	0	1097	1659	162	1.31	-0.18	1.04	0.98
hSQ030870	NA	TMEM185B	79134	1.48	0.23	10.94	-0.4	0.81	-1.12	30.1	85.21	1.1	0.68	-1.39	14.69	39.23	0.89	0.84	-0.47	108.64	100	5.6	5.24	NA	NA	NA	NA	NA	NA	NA	NA	NA	NA	NA	NA	NA	NA	NA	NA	NA	NA	1.21	-0.42	0.94	0.94
hSQ018809	NM_017832	C9orf6	54942	1.48	0.23	11.08	0.64	2.01	-0.03	92.38	100	0.92	0.91	1.03	27.27	56.85	0.86	0.89	0.21	108.17	100	3.07	3.18	0	1	0	0	0	1	1	1	0	0	0	0	0	0	0	1269	546	306	1.37	-0.01	1.04	1.03
hSQ002762	NM_001359	DECR1	1666	1.48	0.23	11.11	-1.79	-0.71	-0.23	92.38	100	-1.26	-1.39	-2.02	14.69	28.91	0.94	0.9	0.2	108.17	100	6.32	6.51	0	0	0	0	0	1	1	1	0	0	0	0	0	0	0	102	1008	141	1.08	-0.13	0.95	1.03
hSQ011158	NM_021244	RRAGD	58528	1.48	0.23	11.12	2.46	4.12	-1.91	5.14	28.57	0.63	-0.28	0.93	28.01	57.96	0.73	0.78	0.45	108.17	100	2.94	3.17	0	0	0	0	0	0	0	0	0	0	0	0	0	0	0	181	1203	53	1.65	-0.91	1.07	1.08
hSQ019042	NM_021961	TEAD1	7003	1.48	0.23	11.12	-0.9	0.28	-1.19	25.69	79.58	-1.16	-1.82	-2.1	14.69	27.89	0.97	0.9	-1.94	34.95	60.08	5.9	4.25	9	3	2	2	1	1	0	0	0	0	0	0	0	0	0	7530	1236	665	1.18	-0.67	0.93	0.72
hSQ015837	NM_003873	NRP1	8829	1.47	0.23	11.18	-1.4	-0.12	-0.63	91.61	100	-3.12	-3.47	0.47	29.81	60.94	0.83	0.85	-2.55	28.06	37.05	7.4	6.33	3	1	1	1	0	0	1	0	0	0	0	0	0	0	0	2578	2772	523	1.29	-0.35	1.03	0.85
hSQ044157	NM_016462	TMEM14C	51522	1.47	0.23	11.24	-0.59	0.5	-0.24	92.38	100	1.99	1.83	-0.88	19.17	48.5	0.98	0.95	0.49	108.17	100	5.47	5.85	0	0	0	0	0	1	1	1	0	0	0	0	0	0	0	459	339	181	1.09	-0.15	0.97	1.07
hSQ012532	NM_175058	PLEKHA7	144100	1.47	0.23	11.25	2.77	3.71	-1.03	35.24	91.78	0.06	-0.48	-0.35	21.69	56.59	0.82	0.8	-0.84	108.64	100	5.52	5.18	0	0	0	0	0	5	4	3	0	0	NA	NA	NA	NA	NA	1422	3366	NA	0.94	-0.54	0.97	0.94
hSQ037779	NM_018246	CCDC25	55246	1.47	0.23	11.3	-0.29	0.82	-0.11	92.38	100	-0.35	-0.39	-0.2	21.69	58.29	0.89	0.88	-0.72	108.64	100	4.68	4.28	1	1	1	1	1	0	0	0	0	0	0	0	0	0	0	2900	627	113	1.11	-0.04	0.99	0.91
hSQ031251	NM_016565	CHCHD8	51287	1.47	0.23	11.31	-0.14	1.01	-0.89	58.83	100	2.17	1.72	-1.57	14.69	36.14	0.95	0.9	-0.33	108.64	100	4.72	4.47	1	1	1	0	0	0	0	0	0	0	0	0	0	0	0	445	264	105	1.15	-0.45	0.94	0.95
hSQ014852	NM_032758	PHF5A	84844	1.47	0.23	11.42	-0.32	0.67	-0.6	91.91	100	2.21	1.96	-0.11	21.69	59.15	0.9	0.89	0.07	108.17	100	3.65	3.7	0	1	0	0	0	0	0	0	0	0	0	0	0	0	0	680	333	51	0.99	-0.25	1	1.01
hSQ044875	NM_001037283	EIF3B	8662	1.47	0.23	11.51	1.6	2.87	-1.59	11.29	49.03	1.54	0.71	-2.2	14.69	26.59	0.98	0.92	-1.09	81.59	100	9.81	9.23	2	2	1	0	0	1	2	1	1	1	0	0	0	0	0	551	2445	83	1.28	-0.84	0.93	0.94
hSQ034622	NM_022776	OSBPL11	114885	1.46	0.23	11.59	1.08	2.08	-1.48	13.85	57.02	1.35	0.33	-1.66	14.69	34.6	0.9	0.84	-1.09	81.59	100	8.03	7.23	1	2	1	1	1	2	0	0	0	0	0	0	0	0	0	1655	2244	290	1	-1.02	0.93	0.9
hSQ022619	NM_001024924	EXOC1	55763	1.46	0.23	11.6	-1.69	-0.4	-0.04	92.38	100	-1.01	-1.04	1.01	27.27	57.11	0.82	0.9	0.04	108.17	100	7.48	7.53	1	0	0	0	0	0	0	0	0	0	0	0	0	0	0	583	2685	314	1.29	-0.03	1.09	1.01
hSQ019040	NM_001414	EIF2B1	1967	1.46	0.26	11.83	-1.2	0	-1.15	30.1	83.04	1.71	1.21	-3.67	9.63	16.03	0.97	0.9	0.21	108.17	100	5.68	5.8	2	1	1	0	0	0	0	0	0	0	0	0	0	0	0	733	918	143	1.2	-0.49	0.92	1.02
hSQ015808	NM_138376	TTC5	91875	1.46	0.26	11.86	-0.49	0.47	0.43	84.11	95.21	1.95	2.13	-1.55	14.69	36.45	0.95	0.92	0.04	108.17	100	5.69	5.73	0	0	0	0	0	0	1	0	0	0	NA	NA	NA	NA	NA	482	1323	NA	0.96	0.17	0.97	1.01
hSQ007454	NA	LOC284242	284242	1.46	0.26	11.89	-0.05	0.82	0.09	90.93	100	2.04	2.09	0.26	29.81	61.01	0.1	0.11	-0.27	108.64	100	2.91	2.74	NA	NA	NA	NA	NA	NA	NA	NA	NA	NA	NA	NA	NA	NA	NA	NA	NA	NA	0.86	0.05	1.14	0.94
hSQ003032	NM_020861	ZBTB2	57621	1.46	0.26	11.89	-0.7	0.42	-0.81	65.69	100	0.94	0.59	2.79	9.63	26.77	0.27	0.45	-0.78	108.64	100	4.18	3.73	1	0	0	0	0	0	2	0	0	0	0	0	0	0	0	1405	1545	135	1.12	-0.34	1.65	0.89
hSQ021024	NM_001006656	ZNF473	25888	1.45	0.26	11.97	0.65	2.05	-0.22	92.38	100	0.57	0.46	-0.34	21.69	56.8	0.83	0.81	-0.9	108.64	100	4.95	4.39	0	1	0	0	0	2	1	0	0	0	0	0	0	0	0	1713	2616	237	1.4	-0.11	0.98	0.89
hSQ044065	NM_015322	FEM1B	10116	1.45	0.26	12.04	1.46	2.41	-0.51	92.38	100	0.95	0.72	-0.97	14.69	46.94	0.94	0.91	-0.45	108.64	100	5.94	5.61	0	0	0	0	0	0	2	0	0	0	0	0	0	0	0	59	1884	615	0.95	-0.23	0.97	0.94
hSQ013438	NM_001040647	RCP9	27297	1.45	0.26	12.12	0.9	2.21	-0.3	92.38	100	0.13	-0.05	2.63	14.69	29.35	0.47	0.7	-0.27	108.64	100	4.17	3.96	4	2	2	2	1	0	0	0	0	0	0	0	0	0	0	2207	348	145	1.31	-0.18	1.48	0.95
hSQ025631	NM_006415	SPTLC1	10558	1.45	0.26	12.15	-1.91	-0.76	-1.68	9.09	42.73	0.62	-0.13	-1.77	14.69	32.79	0.95	0.89	-0.3	108.64	100	6.8	6.6	1	1	1	0	0	0	0	0	0	0	NA	NA	NA	NA	NA	1320	1422	NA	1.15	-0.76	0.93	0.97
hSQ006875	NM_004759	MAPKAPK2	9261	1.45	0.26	12.22	1.05	2.43	-0.65	90.93	100	1.09	0.72	0.63	29.81	60.3	0.74	0.76	-0.05	108.64	100	4.5	4.47	2	4	1	0	0	0	1	0	0	0	0	0	0	0	0	2190	1113	286	1.38	-0.37	1.04	0.99
hSQ031212	NM_015937	PIGT	51604	1.45	0.26	12.29	0.15	1.05	0.44	84.11	94.94	-0.39	-0.15	-1.99	14.69	29.42	0.93	0.9	0.33	108.17	100	4.85	5.04	0	0	0	0	0	3	1	1	0	0	0	0	0	0	0	418	1737	73	0.9	0.24	0.97	1.04
hSQ015233	NM_006553	SLMO1	10650	1.45	0.26	12.31	1.18	2.33	0.06	90.93	100	0.26	0.29	1.2	26.68	54.63	0.56	0.71	-0.01	108.64	100	2.97	2.96	1	1	0	0	0	0	0	0	0	0	NA	NA	NA	NA	NA	1103	519	NA	1.15	0.03	1.26	1
hSQ032487	NM_003594	TTF2	8458	1.44	0.26	12.34	1.5	2.61	-0.6	91.91	100	0.25	-0.07	-0.21	21.69	58.2	0.9	0.89	0.58	108.17	100	5.27	5.64	1	0	0	0	0	0	2	0	0	0	NA	NA	NA	NA	NA	1343	3489	NA	1.11	-0.32	0.99	1.07
hSQ033949	NM_002857	PEX19	5824	1.44	0.26	12.38	1.19	2.24	-0.38	92.38	100	1.16	0.98	-0.79	19.17	50.03	0.9	0.89	-0.45	108.64	100	5.15	4.89	3	2	2	0	0	0	0	0	0	0	NA	NA	NA	NA	NA	2739	900	NA	1.04	-0.18	0.99	0.95
hSQ031802	NM_001077181	CDC14B	8555	1.44	0.26	12.39	-1.73	-0.06	-0.64	90.93	100	0.41	0.15	-0.5	21.69	54.63	0.69	0.66	-0.56	108.64	100	4.24	3.99	3	2	1	0	0	2	0	0	0	0	0	0	0	0	0	3638	1386	105	1.67	-0.27	0.97	0.94
hSQ023907	NM_006041	HS3ST3B1	9953	1.44	0.26	12.41	2.17	3.28	0.15	90.93	100	1.4	1.47	-0.16	21.69	58.7	0.86	0.85	0.23	108.17	100	4.12	4.28	0	0	0	0	0	0	0	0	0	0	0	0	0	0	0	529	1173	330	1.11	0.08	0.99	1.04
hSQ005291	NM_001101654	CXXC1	30827	1.44	0.26	12.55	0.64	1.95	-0.2	92.38	100	0.82	0.7	-1.86	14.69	31.35	0.92	0.87	-0.11	108.64	100	5.47	5.39	1	1	0	0	0	1	1	0	0	0	0	0	0	0	0	250	1983	733	1.31	-0.12	0.94	0.99
hSQ025943	NM_001037334	USP14	9097	1.44	0.26	12.58	-1.73	-0.77	-0.47	92.38	100	0.85	0.61	-0.73	19.17	51.09	0.93	0.9	0.55	108.17	100	7.42	8.06	4	1	1	2	1	2	2	1	0	0	0	0	0	0	0	2455	1380	216	0.97	-0.24	0.97	1.09
hSQ024687	NM_016930	STX18	53407	1.44	0.26	12.58	1.32	2.53	-0.5	92.38	100	0.59	0.37	0.51	29.81	60.83	0.82	0.85	0.07	108.17	100	5.58	5.61	2	1	0	0	0	0	0	0	0	0	0	0	0	0	0	1063	1008	84	1.21	-0.22	1.03	1.01
hSQ027207	NM_002802	PSMC1	5700	1.44	0.26	12.61	-0.41	0.46	-0.07	92.38	100	1.38	1.33	0.52	29.81	60.79	0.88	0.9	-0.12	108.64	100	7.24	7.09	0	0	0	0	0	0	0	0	0	0	NA	NA	NA	NA	NA	213	1323	NA	0.87	-0.05	1.02	0.98
hSQ032202	NM_015235	CSTF2T	23283	1.44	0.26	12.73	0.24	1.23	-0.14	92.38	100	-0.18	-0.24	1.69	22.99	46.75	0.68	0.75	-1.29	59.85	95.13	7.78	7.13	1	0	0	0	0	1	1	1	0	0	NA	NA	NA	NA	NA	2212	1851	NA	0.99	-0.06	1.11	0.92
hSQ015673	NM_001098802	CEP78	84131	1.44	0.26	12.73	-2.3	-0.96	-0.68	90.93	100	1.08	0.77	-1.66	14.69	34.64	0.96	0.91	-0.35	108.64	100	6.09	5.84	0	0	0	0	0	0	2	0	0	0	0	0	0	0	0	305	2169	276	1.34	-0.31	0.95	0.96
hSQ015280	NM_003409	ZFP161	7541	1.43	0.26	12.76	1.82	3.14	-0.48	92.38	100	-0.31	-0.63	4.03	5.86	10.9	0.66	0.82	0.16	108.17	100	5.17	5.24	1	0	0	0	0	1	0	0	1	0	0	0	0	0	0	1478	1350	68	1.32	-0.31	1.25	1.01
hSQ009965	NM_000183	HADHB	3032	1.43	0.26	12.76	3.39	4.48	-2.38	2.6	9.45	0.96	-0.34	-2.35	14.69	24.68	0.96	0.9	-4.41	0	43.77	10.2	8.18	0	1	0	0	0	1	0	0	0	0	0	1	0	0	0	511	1425	251	1.09	-1.3	0.94	0.8
hSQ034049	NM_032145	FBXO30	84085	1.43	0.26	12.86	1.62	2.76	-0.48	92.38	100	1.4	1.08	1.21	26.28	54.51	0.7	0.76	-1.18	71.06	100	6.69	5.98	3	0	0	1	0	1	1	1	0	0	0	0	0	0	0	1968	2238	199	1.14	-0.32	1.08	0.89
hSQ008054	NM_019605	SERTAD4	56256	1.43	0.26	12.89	1.44	3.07	-0.86	58.83	100	-0.38	-0.81	-0.3	21.69	57.24	0.86	0.85	-0.98	108.61	100	4.8	4.31	1	1	1	1	1	1	1	0	0	0	0	0	0	0	0	756	1071	179	1.63	-0.43	0.98	0.9
hSQ045355	NM_080836	STK35	140901	1.43	0.26	13.11	1.38	3.03	-0.04	92.38	100	-0.86	-0.88	-0.97	14.69	47	0.93	0.87	-0.35	108.64	100	4.6	4.37	4	3	1	1	1	2	0	0	0	0	NA	NA	NA	NA	NA	4804	1206	NA	1.65	-0.02	0.93	0.95
hSQ014001	NM_012295	CABIN1	23523	1.43	0.26	13.15	-0.68	0.4	0.22	90.93	100	-1.12	-1.01	0.28	29.81	61.04	0.83	0.85	-0.77	108.64	100	6.15	5.75	0	0	0	0	0	1	3	0	0	0	0	0	0	0	0	432	6663	127	1.09	0.12	1.02	0.93
hSQ005562	NM_012345	NUFIP1	26747	1.42	0.26	13.19	-1.65	-0.47	-0.27	92.38	100	1.78	1.66	-0.99	14.69	46.62	0.9	0.87	-1.8	34.95	67.31	8.07	7.17	4	2	1	2	0	0	0	0	0	0	NA	NA	NA	NA	NA	1957	1488	NA	1.18	-0.12	0.97	0.89
hSQ002613	NM_001024683	ZNF688	146542	1.42	0.26	13.36	0.75	1.87	-0.65	90.93	100	0.22	-0.15	1.77	22.31	45.29	0.34	0.6	0.4	108.17	100	3.1	3.37	0	1	0	0	0	0	1	0	0	0	0	0	0	0	0	213	789	132	1.12	-0.38	1.73	1.09
hSQ034086	NM_021078	GCN5L2	2648	1.42	0.26	13.47	-0.27	1	0.05	90.93	100	0.97	0.99	-1.77	14.69	32.83	0.91	0.84	0.45	108.17	100	4.55	4.84	1	0	0	0	0	1	1	0	1	0	0	0	0	0	0	538	2514	60	1.28	0.02	0.92	1.06
hSQ024261	NM_145805	ISL2	64843	1.42	0.26	13.51	1.66	2.69	-0.2	92.38	100	3.08	2.99	-0.39	21.69	56.2	0.79	0.77	-0.06	108.64	100	4.93	4.88	1	0	0	0	0	0	0	0	0	0	0	0	0	0	0	640	1080	78	1.03	-0.1	0.97	0.99
hSQ043193	NM_014909	VASH1	22846	1.41	0.26	13.61	1.3	2.86	0.03	90.93	100	0.59	0.61	-1.31	14.69	40.77	0.95	0.9	-0.02	108.64	100	5.16	5.15	3	3	1	0	0	0	1	0	0	0	1	1	1	0	0	3997	1098	633	1.56	0.02	0.95	1
hSQ036745	NM_138476	MDP-1	145553	1.41	0.26	13.66	-0.45	0.7	0.41	84.11	95.84	0.42	0.62	-0.93	14.69	47.68	0.92	0.88	1.16	85.33	100	3.66	4.28	0	0	0	0	0	0	1	0	0	0	0	0	0	0	0	70	531	80	1.15	0.21	0.96	1.17
hSQ023748	NM_002340	LSS	4047	1.41	0.26	13.7	1.98	2.91	-0.28	92.38	100	0.03	-0.11	-1.32	14.69	40.53	0.94	0.91	-0.16	108.64	100	5.74	5.65	4	1	0	1	0	1	0	0	0	0	NA	NA	NA	NA	NA	1977	2199	NA	0.94	-0.15	0.96	0.98
hSQ002745	NM_153687	IKIP	121457	1.41	0.26	13.84	-0.87	0.28	-1.9	5.14	28.67	0.68	-0.05	-0.58	21.69	53.52	0.89	0.87	-0.35	108.64	100	6.18	5.98	1	3	1	0	0	0	2	0	0	0	0	0	0	0	0	1674	1134	110	1.15	-0.73	0.97	0.97
hSQ000772	NM_032881	LSM10	84967	1.41	0.26	13.86	-1.53	-0.58	-1.23	25.69	77.2	2.16	1.65	-0.81	19.17	49.74	0.86	0.78	0.13	108.17	100	3.44	3.55	1	0	0	0	0	0	0	0	0	0	0	0	0	0	0	328	372	150	0.95	-0.51	0.9	1.03
hSQ000031	NM_007010	DDX52	11056	1.41	0.26	13.9	-0.66	0.33	-0.08	92.38	100	1.93	1.9	-1.17	14.69	43.38	0.94	0.91	0.4	108.17	100	7.93	8.16	3	3	1	1	0	0	0	0	0	0	NA	NA	NA	NA	NA	1928	1800	NA	0.99	-0.03	0.97	1.03
hSQ022263	NM_017860	C1orf56	54964	1.41	0.26	13.92	1.47	2.75	-1.12	30.1	84.95	2.86	2.41	-1.08	14.69	45.02	0.89	0.86	0.81	108.17	100	4.89	5.21	1	0	0	0	0	0	1	0	0	0	0	0	0	0	0	935	1026	65	1.28	-0.45	0.96	1.07
hSQ001519	NM_018087	TMEM48	55706	1.41	0.26	13.93	0.95	2.22	-0.62	91.61	100	1.69	1.35	0.68	29.81	60	0.85	0.88	0.45	108.17	100	3.94	4.21	1	0	0	0	0	2	2	2	0	0	1	0	0	0	0	253	2025	241	1.27	-0.34	1.03	1.07
hSQ031157	NA	EST_AA252511	repname(hSQ031157)	1.4	0.26	14.1	0.81	2.07	-0.7	84.11	100	-0.11	-0.41	-1.8	14.69	32.33	0.96	0.9	-0.82	108.64	100	5.71	5.15	NA	NA	NA	NA	NA	NA	NA	NA	NA	NA	NA	NA	NA	NA	NA	NA	NA	NA	1.25	-0.3	0.93	0.9
hSQ014437	NM_001015048	BAG5	9529	1.4	0.26	14.19	-0.22	0.78	0.03	90.93	100	1.26	1.28	-0.73	19.17	51.02	0.81	0.78	-0.2	108.64	100	5.92	5.8	1	2	1	0	0	0	0	0	0	0	0	0	0	0	0	3269	1344	227	1	0.01	0.96	0.98
hSQ034272	NM_002971	SATB1	6304	1.4	0.26	14.2	2.27	3.43	-0.61	91.61	100	-0.41	-0.74	0.22	29.81	60.93	0.77	0.78	0.76	108.17	100	4.46	4.88	1	0	0	0	0	1	1	1	0	0	0	0	0	0	0	1227	2292	246	1.16	-0.33	1.02	1.09
hSQ031718	NM_145858	CRYZL1	9946	1.4	0.26	14.29	-1.57	-0.5	-0.33	92.38	100	-0.49	-0.63	0.44	29.81	61	0.75	0.79	0.17	108.17	100	3.18	3.28	0	0	0	0	0	2	2	1	0	0	0	0	0	0	0	478	1050	180	1.08	-0.14	1.05	1.03
hSQ015964	NM_014380	NGFRAP1	27018	1.4	0.26	14.37	-1.62	-0.58	0.66	74.83	85.39	1.47	1.75	2.58	14.69	30.38	0.15	0.31	0.27	108.17	100	2.8	3.04	2	0	0	0	0	2	0	0	1	0	1	1	0	0	0	244	336	311	1.04	0.27	2.03	1.09
hSQ028416	NM_130809	PRRC1	133619	1.4	0.26	14.42	-1.37	-0.37	0.01	90.93	100	0.3	0.31	-1.64	14.69	34.95	0.92	0.87	-0.99	108.61	100	7.74	7.36	2	0	0	1	0	3	2	1	0	0	0	0	0	0	0	3164	1338	141	1	0.01	0.94	0.95
hSQ004890	NM_018559	KIAA1704	55425	1.39	0.26	14.47	-0.12	1.34	-0.85	58.83	100	0.92	0.42	0.51	29.81	60.82	0.84	0.89	-0.1	108.64	100	5.4	5.32	0	0	0	0	0	0	0	0	0	0	0	0	0	0	0	264	1023	103	1.46	-0.5	1.06	0.99
hSQ037856	NM_000199	SGSH	6448	1.39	0.26	14.5	-0.21	0.73	-0.02	92.38	100	0.73	0.72	-1.06	14.69	45.3	0.81	0.79	-1.07	81.59	100	6.01	5.45	1	0	0	0	0	2	1	1	1	1	NA	NA	NA	NA	NA	1161	1509	NA	0.94	-0.01	0.97	0.91
hSQ027889	NM_001008410	STEAP3	55240	1.39	0.26	14.55	-0.08	1.15	-0.91	52.46	99.63	-1.25	-1.77	-1.18	14.69	43.04	0.94	0.9	-1.24	66.03	97.4	7.21	6.45	3	5	1	0	0	0	0	0	0	0	0	0	0	0	0	2311	1467	89	1.23	-0.53	0.97	0.89
hSQ015484	NM_001046	SLC12A2	6558	1.39	0.26	14.62	0.2	1.37	-0.72	84.11	100	0	-0.37	-0.8	19.17	49.97	0.9	0.87	-0.69	108.64	100	8.21	7.71	2	2	1	0	0	1	1	1	0	0	0	0	0	0	0	3056	3639	164	1.17	-0.37	0.96	0.94
hSQ000558	NM_003416	ZNF7	7553	1.39	0.26	14.7	-0.09	0.9	0.43	84.11	95.24	-0.15	0.06	5.92	3.9	3.68	0.52	0.69	0.05	108.17	100	4.48	4.51	0	0	0	0	0	0	0	0	0	0	0	0	0	0	0	52	2061	229	0.99	0.21	1.33	1.01
hSQ038701	NM_032488	CNFN	84518	1.39	0.26	14.71	-0.9	0.05	-0.02	92.38	100	2.2	2.19	0.42	29.81	61.02	0.82	0.85	-0.09	108.64	100	3.16	3.09	0	0	0	0	0	1	1	1	0	0	0	0	0	0	0	131	339	50	0.96	-0.01	1.04	0.98
hSQ044987	NM_032256	TMEM117	84216	1.39	0.26	14.74	0.93	1.97	-1.7	7.95	41.62	-0.67	-1.36	1.28	26.28	53.46	0.78	0.83	0.33	108.17	100	3.86	4.04	1	2	1	0	0	0	0	0	0	0	0	0	0	0	0	1085	1545	66	1.04	-0.69	1.06	1.04
hSQ038003	NM_018101	CDCA8	55143	1.39	0.26	14.76	1.43	2.42	-0.46	92.38	100	1.87	1.68	-1.85	14.69	31.55	0.94	0.9	-0.2	108.64	100	7.95	7.79	1	2	0	0	0	0	0	0	0	0	0	0	0	0	0	1351	843	107	0.99	-0.19	0.97	0.98
hSQ012886	NM_018216	PANK4	55229	1.39	0.26	14.8	0.34	1.23	-0.37	92.38	100	0.59	0.45	0.14	29.81	60.69	0.84	0.84	-0.2	108.64	100	6.44	6.28	0	0	0	0	0	1	3	1	1	1	NA	NA	NA	NA	NA	311	2322	NA	0.89	-0.14	1.01	0.98
hSQ016535	NM_005981	TSPAN31	6302	1.39	0.26	14.8	2.06	2.96	0.03	90.93	100	0.48	0.5	0.6	29.81	60.45	0.78	0.82	0.1	108.17	100	4.35	4.41	1	0	0	0	0	1	1	1	0	0	0	0	0	0	0	952	633	154	0.9	0.01	1.05	1.01
hSQ037967	NM_015206	KIAA1024	23251	1.39	0.26	14.84	-0.42	0.85	-0.31	92.38	100	-0.74	-0.88	1.75	22.31	45.77	0.54	0.71	0.03	108.17	100	3.12	3.14	3	2	1	1	0	0	1	0	0	0	0	0	0	0	0	3916	2751	75	1.27	-0.15	1.31	1.01
hSQ000687	NM_145303	LOC202459	202459	1.39	0.26	14.84	-2.31	-0.5	-0.17	92.38	100	-0.39	-0.61	2.41	19.17	33.29	0.56	0.81	0.07	108.17	100	2.91	2.98	3	2	2	0	0	0	0	0	0	0	0	0	0	0	0	595	360	231	1.81	-0.22	1.45	1.03
hSQ019958	NM_015114	ANKLE2	23141	1.39	0.26	14.88	0.91	2	-0.92	52.46	98.86	1.39	0.91	-1.75	14.69	33.13	0.93	0.86	-0.52	108.64	100	5.77	5.27	1	2	1	0	0	0	0	0	0	0	0	0	0	0	0	1574	2817	67	1.09	-0.48	0.92	0.91
hSQ039942	NM_178868	CMTM8	152189	1.38	0.26	14.92	0.91	2.79	-0.86	58.83	100	3.05	2.49	0.21	29.81	60.92	0.92	0.92	0.23	108.17	100	3.52	3.7	0	0	0	0	0	2	1	1	0	0	0	0	0	0	0	352	522	294	1.88	-0.56	1.01	1.05
hSQ032090	NM_022826	2009-03-07	64844	1.38	0.26	14.98	-0.92	-0.09	0	92.38	100	0.68	0.68	0.2	29.81	60.88	0.8	0.82	-0.62	108.64	100	6.73	6.34	1	0	0	1	0	1	0	0	0	0	0	0	0	0	0	1230	2115	122	0.83	0	1.02	0.94
hSQ022388	NM_007271	STK38	11329	1.38	0.26	15.01	2.15	3.66	-1.7	7.95	41.36	-0.32	-1.19	-1.96	14.69	29.83	0.89	0.83	-2.3	34.95	44.41	6.52	5.33	3	1	1	0	0	0	0	0	0	0	1	0	0	0	0	1889	1398	286	1.51	-0.87	0.93	0.82
hSQ027181	NM_016551	TM7SF3	51768	1.38	0.26	15.02	-1.56	-0.63	-0.3	92.38	100	-0.52	-0.68	0.59	29.81	60.49	0.86	0.89	0.2	108.17	100	4.04	4.13	0	1	0	0	0	1	1	1	0	0	NA	NA	NA	NA	NA	760	1713	NA	0.93	-0.16	1.04	1.02
hSQ029490	NM_001098721	GNG4	2786	1.38	0.26	15.07	-0.71	0.28	-0.66	90.93	100	1.08	0.83	-0.01	21.69	59.9	0.74	0.74	0.15	108.17	100	3.74	3.81	2	2	0	1	0	0	1	0	0	0	0	0	0	0	0	4424	228	328	0.99	-0.25	1	1.02
hSQ004775	NM_005702	ERAL1	26284	1.38	0.26	15.1	-1.52	-0.19	-1.52	11.29	53.97	1.19	0.63	-3.75	9.63	15.82	0.95	0.83	0.1	108.17	100	5.4	5.48	1	0	0	1	0	1	1	1	1	1	NA	NA	NA	NA	NA	501	1314	NA	1.33	-0.56	0.88	1.01
hSQ037458	NA	ncRNA_U27_2	repname(hSQ037458)	1.38	0.26	15.11	-2.32	-1.29	-0.05	92.38	100	0.62	0.58	-0.12	21.69	59.06	0.31	0.29	0.27	108.17	100	2.03	2.17	NA	NA	NA	NA	NA	NA	NA	NA	NA	NA	NA	NA	NA	NA	NA	NA	NA	NA	1.02	-0.04	0.95	1.07
hSQ043224	NM_138346	KIAA2013	90231	1.38	0.26	15.13	0.28	1.37	-0.83	65.69	100	0.5	0.11	-0.01	21.69	59.89	0.85	0.85	-1	108.61	100	5.49	4.95	1	1	1	0	0	0	0	0	0	0	0	0	0	0	0	247	1905	186	1.08	-0.39	1	0.9
hSQ040007	NM_002061	GCLM	2730	1.38	0.26	15.14	-2.66	-1.66	0.41	84.11	96.15	1.01	1.27	-3.13	9.63	18.16	0.96	0.91	0.56	108.17	100	5.21	5.69	0	0	0	0	0	0	0	0	0	0	1	1	1	0	0	1956	825	293	1	0.26	0.94	1.09
hSQ021115	NM_006704	SUGT1	10910	1.38	0.26	15.31	0.83	2.06	-0.65	90.93	100	2.03	1.72	-1.97	14.69	29.7	0.91	0.88	-0.76	108.64	100	6.84	6.45	1	0	0	1	0	0	1	0	0	0	0	0	0	0	0	463	1002	55	1.22	-0.31	0.96	0.94
hSQ038629	NM_002293	LAMC1	3915	1.38	0.26	15.34	-0.02	0.89	-0.59	91.91	100	-0.82	-1.07	-0.28	21.69	57.48	0.9	0.89	-0.08	108.64	100	7.86	7.81	4	3	3	1	0	1	1	0	0	0	1	0	0	0	0	2802	4830	257	0.91	-0.25	0.99	0.99
hSQ016605	NM_152326	ANKRD9	122416	1.37	0.26	15.39	3.43	4.7	-0.01	92.38	100	-0.15	-0.16	1.3	26.28	53.17	0.24	0.33	0.63	108.17	100	3.18	3.57	0	0	0	0	0	0	1	0	0	0	2	1	1	0	0	75	954	597	1.27	0	1.38	1.12
hSQ029336	NM_003452	ZNF189	7743	1.37	0.26	15.43	0	1.29	-0.25	92.38	100	0.4	0.29	1.64	22.99	47.58	0.58	0.75	-1.5	48.64	84.08	4.98	4.35	1	1	1	0	0	0	0	0	0	0	0	0	0	0	0	1011	1881	276	1.3	-0.1	1.29	0.87
hSQ031234	NM_014168	METTL5	29081	1.37	0.26	15.46	-0.67	1.11	-0.39	92.38	100	1.83	1.62	-0.06	21.69	59.57	0.93	0.93	0.06	108.17	100	4.63	4.69	0	0	0	0	0	0	0	0	0	0	1	1	1	0	0	60	630	246	1.78	-0.21	1	1.01
hSQ025676	NM_012216	MID2	11043	1.37	0.26	15.48	-1.14	0.12	-0.72	84.11	100	3.62	3.33	-1.14	14.69	43.82	0.91	0.87	-0.62	108.64	100	5.45	5.04	0	0	0	0	0	2	1	1	1	1	0	0	0	0	0	118	2148	257	1.26	-0.29	0.96	0.92
hSQ028044	NM_181336	LEMD2	221496	1.37	0.26	15.57	0.73	2.07	-0.12	92.38	100	-0.06	-0.12	-1.78	14.69	32.7	0.88	0.85	0.12	108.17	100	5.19	5.28	2	1	1	0	0	1	0	0	0	0	NA	NA	NA	NA	NA	1399	1512	NA	1.34	-0.07	0.96	1.02
hSQ022071	NM_014317	PDSS1	23590	1.37	0.26	15.61	-0.7	0.23	-0.38	92.38	100	2.12	1.95	-0.41	21.69	55.83	0.86	0.84	-0.22	108.64	100	4.98	4.82	0	1	0	0	0	0	0	0	0	0	NA	NA	NA	NA	NA	322	1248	NA	0.94	-0.17	0.98	0.97
hSQ010586	NM_004538	NAP1L3	4675	1.37	0.26	15.71	-3.09	-1.96	-1.21	25.69	78.42	2.41	1.74	0.57	29.81	60.6	0.81	0.82	-0.48	108.64	100	9	8.81	1	1	1	0	0	0	0	0	0	0	0	0	0	0	0	851	1521	305	1.13	-0.67	1.01	0.98
hSQ044004	NM_001037808	EIF3S8	8663	1.37	0.26	15.74	1.22	2.23	0.35	84.11	98.28	1.67	1.87	-2.12	14.69	27.61	0.96	0.91	0.87	108.17	100	11.07	11.77	0	0	0	0	0	1	3	1	0	0	0	0	0	0	0	214	2742	137	1.02	0.2	0.95	1.06
hSQ015829	NM_024097	C1orf50	79078	1.37	0.26	15.76	0.93	1.74	0.01	90.93	100	0.89	0.89	-0.61	21.69	53.05	0.81	0.78	0.19	108.17	100	3.8	3.91	1	0	0	0	0	0	1	0	0	0	NA	NA	NA	NA	NA	345	600	NA	0.81	0.01	0.97	1.03
hSQ021716	NA	FAM59B	150946	1.36	0.26	15.8	0.63	1.66	-0.64	90.93	100	0.14	-0.21	3.73	7.47	13.76	0.54	0.72	-0.04	108.64	100	4.25	4.23	NA	NA	NA	NA	NA	NA	NA	NA	NA	NA	NA	NA	NA	NA	NA	NA	NA	NA	1.03	-0.35	1.33	0.99
hSQ044093	NM_006415	SPTLC1	10558	1.36	0.26	15.93	-1.54	-0.39	-1.34	15.82	68.5	0.9	0.18	-1.75	14.69	33.09	0.94	0.88	0.06	108.17	100	6.98	7.04	1	1	1	0	0	0	0	0	0	0	NA	NA	NA	NA	NA	1320	1422	NA	1.15	-0.71	0.93	1.01
hSQ034870	NM_012310	KIF4A	24137	1.36	0.26	16.01	-2.24	-0.34	0.26	90.93	100	0	0.14	-1.01	14.69	46.26	0.95	0.92	-0.44	108.64	100	8.47	8	0	0	0	0	0	2	1	1	0	0	0	0	0	0	0	620	3699	127	1.91	0.14	0.97	0.95
hSQ029772	NM_014053	FLVCR	28982	1.36	0.26	16.09	-1.19	-0.31	0.15	90.93	100	0.82	0.88	-0.43	21.69	55.67	0.87	0.86	0.38	108.17	100	6.1	6.33	0	0	0	0	0	2	2	1	0	0	0	0	0	0	0	122	1668	198	0.88	0.06	0.99	1.04
hSQ034191	NM_015339	ADNP	23394	1.36	0.26	16.2	0.4	1.3	-0.23	92.38	100	-0.97	-1.11	-0.81	19.17	49.75	0.93	0.9	-0.03	108.64	100	6.87	6.86	2	0	0	0	0	2	0	0	0	0	1	0	0	0	0	1059	3309	345	0.9	-0.14	0.97	1
hSQ022374	NM_033505	SELI	85465	1.36	0.26	16.21	0.07	1.33	-0.21	92.38	100	0.63	0.54	0.43	29.81	61.01	0.89	0.91	0.17	108.17	100	7.54	7.72	6	4	1	2	1	0	1	0	0	0	0	0	0	0	0	6788	1194	147	1.26	-0.09	1.02	1.02
hSQ011120	NA	repname(hSQ011120)	repname(hSQ011120)	1.36	0.26	16.22	1.52	2.71	-0.81	65.69	100	-0.79	-1.19	-0.86	19.17	48.94	0.96	0.93	-0.78	108.64	100	6.69	6.15	NA	NA	NA	NA	NA	NA	NA	NA	NA	NA	NA	NA	NA	NA	NA	NA	NA	NA	1.18	-0.4	0.97	0.92
hSQ013249	NM_016101	NIP7	51388	1.36	0.26	16.24	-0.76	0.19	-2	4.63	23.5	1.4	0.46	-1.26	14.69	41.66	0.87	0.81	-1.4	51.15	89.62	6.09	5.14	1	2	1	0	0	0	0	0	0	0	0	0	0	0	0	1452	543	187	0.96	-0.95	0.93	0.84
hSQ006435	NM_000857	GUCY1B3	2983	1.35	0.26	16.35	1.49	2.87	-0.32	92.38	100	2.2	2.02	0.32	29.81	61.07	0.89	0.91	-0.22	108.64	100	7.01	6.8	0	0	0	0	0	0	1	0	0	0	0	0	0	0	0	495	1860	78	1.38	-0.18	1.02	0.97
hSQ036480	NM_018157	RIC8B	55188	1.35	0.26	16.48	-1.59	-0.62	-0.17	92.38	100	-0.19	-0.27	1.24	26.28	54.05	0.56	0.65	-0.01	108.64	100	5.3	5.3	1	1	0	0	0	1	1	1	0	0	0	0	0	0	0	3299	1563	125	0.98	-0.08	1.17	1
hSQ032446	NM_017802	HEATR2	54919	1.35	0.37	16.49	-1.83	-0.38	-1.32	21.42	69.97	0.76	0.16	-2.14	14.69	27.29	0.96	0.91	-0.89	108.64	100	7.81	7.23	0	1	0	0	0	0	1	0	0	0	NA	NA	NA	NA	NA	820	2568	NA	1.45	-0.6	0.95	0.93
hSQ019406	NM_001401	LPAR1	1902	1.35	0.37	16.54	1.29	2.33	-0.41	92.38	100	-2.95	-3.19	0.88	28.63	58.44	0.76	0.82	0.06	108.17	100	4.85	4.9	1	0	0	1	0	1	0	0	0	0	0	0	0	0	0	1645	1095	348	1.04	-0.24	1.09	1.01
hSQ014419	NM_017645	FAM29A	54801	1.35	0.37	16.57	-0.16	0.82	-0.84	58.83	100	0.65	0.33	-1.28	14.69	41.21	0.96	0.93	-0.13	108.64	100	6.28	6.12	3	1	0	0	0	1	1	0	0	0	0	1	0	0	0	3199	2868	253	0.98	-0.32	0.96	0.97
hSQ011095	NM_001338	CXADR	1525	1.35	0.37	16.58	-0.9	0.26	-1.86	5.84	31.15	0.31	-0.37	-0.99	14.69	46.65	0.93	0.9	-0.54	108.64	100	6.32	5.87	1	0	0	0	0	0	1	0	0	0	0	0	0	0	0	1254	1098	118	1.16	-0.68	0.96	0.93
hSQ038761	NM_001037811	HSD17B10	3028	1.35	0.37	16.6	-0.36	0.6	-0.99	43.3	94.39	2.16	1.76	-4.17	9.63	15.11	0.92	0.85	0.04	108.17	100	6.43	6.46	0	1	0	0	0	1	0	0	0	0	NA	NA	NA	NA	NA	146	759	NA	0.96	-0.4	0.92	1
hSQ036158	NM_001156	ANXA7	310	1.35	0.37	16.61	-0.29	0.56	-0.52	92.38	100	0.23	-0.02	-0.88	19.17	48.6	0.95	0.92	-0.29	108.64	100	7.91	7.72	2	0	0	1	0	2	1	0	0	0	NA	NA	NA	NA	NA	649	1401	NA	0.86	-0.26	0.97	0.98
hSQ000119	NM_012279	ZNF346	23567	1.35	0.37	16.63	-1.27	-0.2	0.26	90.93	100	2.41	2.54	-1.22	14.69	42.4	0.87	0.8	0.42	108.17	100	4.81	5.12	2	1	0	0	0	0	0	0	0	0	NA	NA	NA	NA	NA	2143	885	NA	1.07	0.13	0.92	1.06
hSQ027260	NA	EST_AA425756	repname(hSQ027260)	1.35	0.37	16.64	1.69	3.17	-0.17	92.38	100	-1.04	-1.12	0.07	29.81	60.39	0.81	0.81	-0.02	108.64	100	4.54	4.53	NA	NA	NA	NA	NA	NA	NA	NA	NA	NA	NA	NA	NA	NA	NA	NA	NA	NA	1.49	-0.08	1.01	1
hSQ024575	NM_006606	RBBP9	10741	1.35	0.37	16.68	3.28	4.47	-1.46	13.85	58.51	1.54	0.67	-4.33	9.63	14.93	0.86	0.76	-1.04	85.33	100	4.34	3.73	1	1	0	0	0	0	0	0	0	0	0	0	0	0	0	3218	561	76	1.18	-0.87	0.88	0.86
hSQ043971	NA	NBPF10	440673	1.34	0.37	16.74	-2.13	-1.16	0.48	84.11	92.94	-0.61	-0.24	-0.87	19.17	48.62	0.92	0.88	1.57	85.33	100	4.36	6.72	NA	NA	NA	NA	NA	NA	NA	NA	NA	NA	NA	NA	NA	NA	NA	NA	NA	NA	0.97	0.37	0.96	1.54
hSQ002405	NM_022826	2009-03-07	64844	1.34	0.37	16.8	1.78	3.05	-0.44	92.38	100	0.54	0.39	0.75	29.81	59.54	0.82	0.86	0.42	108.17	100	6.42	6.65	1	0	0	1	0	1	0	0	0	0	0	0	0	0	0	1230	2115	122	1.27	-0.15	1.05	1.04
hSQ034018	NM_006020	ALKBH1	8846	1.34	0.37	16.92	-1.59	-0.55	-0.84	58.83	100	2.01	1.66	-2.5	14.69	23.1	0.95	0.9	0.45	108.17	100	5.01	5.36	1	0	0	0	0	1	1	1	1	1	NA	NA	NA	NA	NA	1406	1170	NA	1.04	-0.36	0.96	1.07
hSQ006592	NM_014328	RUSC1	23623	1.34	0.37	17.01	0.31	1.33	0.66	74.83	85.65	1.33	1.63	1.09	27.27	56.13	0.78	0.82	-0.03	108.64	100	4.38	4.36	0	0	0	0	0	2	2	0	0	0	0	0	0	0	0	541	1302	318	1.02	0.29	1.06	0.99
hSQ037792	NM_021635	PBOV1	59351	1.34	0.37	17.1	0.34	1.42	0.29	84.11	100	1.12	1.32	0	21.69	59.95	0.88	0.88	-0.24	108.64	100	4.77	4.61	0	1	0	0	0	0	0	0	0	0	0	0	0	0	0	1996	408	95	1.09	0.2	1	0.97
hSQ032480	NM_173065	IL28RA	163702	1.34	0.37	17.14	3.5	5.05	-2.22	4.63	14.23	1.96	1.08	0.19	29.81	60.85	0.68	0.69	-1.19	71.06	99.81	3.68	3.12	5	1	1	1	1	0	2	0	0	0	NA	NA	NA	NA	NA	3669	735	NA	1.54	-0.88	1.01	0.85
hSQ022747	NM_024824	ZC3H14	79882	1.34	0.37	17.16	-4.18	-2.05	-0.1	92.38	100	1.22	1.16	-0.56	21.69	53.69	0.87	0.83	0.48	108.17	100	5.84	6.34	2	0	0	0	0	2	3	1	0	0	0	0	0	0	0	1757	2211	156	2.13	-0.06	0.96	1.09
hSQ005963	NM_007220	CA5B	11238	1.34	0.37	17.16	-0.7	0.26	-1.09	35.24	87.61	-1.77	-2.26	1.07	27.27	56.33	0.6	0.67	-0.46	108.64	100	3.49	3.24	4	3	0	2	0	0	0	0	0	0	0	0	0	0	0	4960	954	117	0.96	-0.48	1.12	0.93
hSQ045347	NM_006857	RY1	11017	1.34	0.37	17.18	-1.84	-0.89	0.39	84.11	96.93	0.6	0.89	1.06	27.27	56.45	0.87	0.91	-0.11	108.64	100	3.96	3.87	0	0	0	0	0	0	0	0	0	0	NA	NA	NA	NA	NA	908	468	NA	0.95	0.29	1.04	0.98
hSQ028761	NM_001009880	C22orf9	23313	1.33	0.37	17.32	0.41	1.43	-0.71	84.11	100	0.36	-0.01	-1.44	14.69	38.47	0.94	0.88	-0.18	108.64	100	4.58	4.49	2	3	0	0	0	1	0	0	0	0	0	0	0	0	0	4934	1215	66	1.03	-0.37	0.94	0.98
hSQ044041	NM_003689	AKR7A2	8574	1.33	0.37	17.38	0.49	1.51	0.29	84.11	100	1.04	1.2	-1.89	14.69	30.83	0.96	0.92	0.41	108.17	100	5.93	6.14	1	0	0	0	0	1	0	0	0	0	NA	NA	NA	NA	NA	255	1080	NA	1.02	0.16	0.96	1.04
hSQ033911	NM_030927	TSPAN14	81619	1.33	0.37	17.49	1.11	2	-0.14	92.38	100	-1.73	-1.79	0.75	29.81	59.52	0.85	0.88	-0.62	108.64	100	4.95	4.6	1	2	1	0	0	0	0	0	0	0	0	0	0	0	0	1652	813	78	0.89	-0.06	1.03	0.93
hSQ033931	NA	EST_AA447504	repname(hSQ033931)	1.33	0.37	17.5	1.65	2.72	-2.18	4.63	15.95	-0.75	-1.64	-0.22	21.69	58.07	0.87	0.85	-0.13	108.64	100	5.56	5.43	NA	NA	NA	NA	NA	NA	NA	NA	NA	NA	NA	NA	NA	NA	NA	NA	NA	NA	1.07	-0.89	0.98	0.98
hSQ034294	NM_022843	PCDH20	64881	1.33	0.37	17.51	-1.55	-0.44	1.72	43.3	47.8	7.6	8.86	-1.69	14.69	34.04	0.93	0.89	-0.74	108.64	100	7.71	7.28	1	1	0	0	0	2	1	0	0	0	0	0	0	0	0	1555	2775	71	1.11	1.26	0.96	0.94
hSQ037926	NM_017488	ADD2	119	1.33	0.37	17.54	0.76	1.83	0.07	90.93	100	1.35	1.4	-1.96	14.69	29.8	0.94	0.89	-0.52	108.64	100	5.9	5.51	1	0	0	0	0	1	2	1	0	0	0	0	0	0	0	1628	1932	465	1.07	0.05	0.95	0.94
hSQ023223	NM_018374	TMEM106B	54664	1.33	0.37	17.55	-1.53	-0.59	-0.68	84.11	100	-1.63	-2.01	-0.77	19.17	50.49	0.96	0.92	0.29	108.17	100	5.15	5.39	3	2	1	1	0	1	0	0	0	0	0	0	0	0	0	5282	825	322	0.94	-0.38	0.96	1.05
hSQ031946	NM_001035260	VPS26A	9559	1.33	0.37	17.57	-2.69	-1.77	-0.29	92.38	100	1.72	1.54	0.01	29.81	60.03	0.84	0.84	-0.12	108.64	100	6.74	6.67	1	1	0	0	0	0	0	0	0	0	0	0	0	0	0	1674	756	126	0.92	-0.18	1	0.99
hSQ028290	NA	UXT	8409	1.33	0.37	17.59	0.54	1.44	0.12	90.93	100	0.75	0.83	-0.33	21.69	56.84	0.85	0.84	1.22	85.33	100	3.86	4.5	NA	NA	NA	NA	NA	NA	NA	NA	NA	NA	NA	NA	NA	NA	NA	NA	NA	NA	0.9	0.08	0.98	1.17
hSQ023158	NM_133443	GPT2	84706	1.33	0.37	17.6	0.25	1.11	-1.01	43.3	93.38	-0.17	-0.69	-1.17	14.69	43.38	0.91	0.88	-1.26	66.03	96.57	5.73	5.09	4	5	2	0	0	0	1	0	0	0	0	0	0	0	0	2289	1572	94	0.87	-0.52	0.96	0.89
hSQ016145	NM_005486	TOM1L1	10040	1.33	0.37	17.67	-1.36	-0.42	-0.72	84.11	100	2.36	2.04	-0.18	21.69	58.49	0.83	0.82	0.19	108.17	100	5.09	5.27	1	1	1	0	0	0	0	0	0	0	NA	NA	NA	NA	NA	716	1431	NA	0.93	-0.33	0.99	1.03
hSQ028463	NM_004414	RCAN1	1827	1.33	0.37	17.68	0.03	1.18	-1.52	11.29	54.11	0.4	-0.47	-0.16	21.69	58.68	0.88	0.88	-0.04	108.64	100	4.52	4.5	1	1	1	0	0	0	0	0	0	0	0	0	0	0	0	1596	759	72	1.16	-0.86	0.99	0.99
hSQ034631	NA	CTA-221G9.4	85379	1.32	0.37	17.7	1.53	2.46	-0.82	65.69	100	0.4	0.01	-1.93	14.69	30.32	0.96	0.9	-0.48	108.64	100	6.53	6.15	NA	NA	NA	NA	NA	NA	NA	NA	NA	NA	NA	NA	NA	NA	NA	NA	NA	NA	0.93	-0.39	0.94	0.94
hSQ034621	NM_152857	WTAP	9589	1.32	0.37	17.83	0.6	1.85	-0.8	65.69	100	2.45	2.14	-0.92	14.69	47.81	0.91	0.89	0.63	108.17	100	6.61	6.81	2	1	1	0	0	0	1	0	0	0	0	0	0	0	0	1047	456	124	1.25	-0.31	0.97	1.03
hSQ010551	NM_012413	QPCT	25797	1.32	0.37	17.87	0.12	1.54	-0.24	92.38	100	-3.97	-4.1	-0.67	21.69	52.04	0.92	0.91	0.81	108.17	100	5.32	5.9	0	0	0	0	0	1	2	1	1	1	0	0	0	0	0	494	1086	122	1.42	-0.13	0.98	1.11
hSQ029284	NM_022761	C11orf1	64776	1.32	0.37	17.89	2.21	3.45	-0.07	92.38	100	-0.53	-0.57	2.71	14.69	28.12	0.53	0.7	0.19	108.17	100	3.89	4	0	0	0	0	0	1	0	0	0	0	0	0	0	0	0	191	453	337	1.24	-0.04	1.33	1.03
hSQ037009	NM_153712	TTL	150465	1.32	0.37	17.89	-0.48	0.59	-0.98	43.3	94.8	0.97	0.53	0.28	29.81	61.04	0.76	0.79	-0.25	108.64	100	3.72	3.59	5	5	2	2	2	1	0	0	0	0	0	0	0	0	0	3846	1134	179	1.07	-0.44	1.03	0.96
hSQ037313	NM_024093	C2orf49	79074	1.32	0.37	17.96	-1.36	-0.56	0.36	84.11	98.09	1.02	1.21	0.93	28.01	57.95	0.87	0.89	0.72	108.17	100	4.83	5.31	0	0	0	0	0	1	0	0	0	0	NA	NA	NA	NA	NA	156	699	NA	0.8	0.19	1.03	1.1
hSQ016626	NM_003110	SP2	6668	1.32	0.37	17.98	1.16	2.45	-0.88	58.83	100	0.42	0.06	0.7	29.81	59.89	0.81	0.83	0.05	108.17	100	5.51	5.54	3	0	0	1	0	0	1	0	0	0	0	0	0	0	0	1133	1842	137	1.29	-0.36	1.02	1.01
hSQ031917	NM_005981	TSPAN31	6302	1.32	0.37	17.98	2.23	3.25	-0.22	92.38	100	0.49	0.37	0.22	29.81	60.93	0.82	0.83	0.36	108.17	100	4.17	4.39	1	0	0	0	0	1	1	1	0	0	0	0	0	0	0	952	633	154	1.02	-0.13	1.02	1.05
hSQ013712	NM_022761	C11orf1	64776	1.32	0.37	18	-0.22	0.92	-0.23	92.38	100	0.03	-0.06	1.96	21.91	41.89	0.68	0.75	0.17	108.17	100	4.79	4.88	0	0	0	0	0	1	0	0	0	0	0	0	0	0	0	191	453	337	1.14	-0.09	1.1	1.02
hSQ018737	NM_032557	USP38	84640	1.32	0.37	18	1.23	2.68	-1.28	21.42	72.57	1.14	0.32	-0.13	21.69	58.93	0.9	0.9	-0.05	108.64	100	5.94	5.89	1	1	1	0	0	5	2	0	0	0	0	0	0	0	0	1030	3129	506	1.45	-0.81	0.99	0.99
hSQ000011	NM_145018	C11orf82	220042	1.32	0.37	18	1.1	2.19	-1.71	7.95	40.85	0.75	-0.06	-1.32	14.69	40.62	0.86	0.82	-0.56	108.64	100	4.55	4.21	2	1	1	0	0	3	0	0	0	0	1	0	0	1	0	320	2997	212	1.09	-0.81	0.96	0.93
hSQ000228	NM_018115	SDAD1	55153	1.32	0.37	18.04	-0.66	0.43	-0.73	74.83	100	0.07	-0.31	0.19	29.81	60.85	0.83	0.84	-1.91	34.95	61.46	7.13	6.4	2	1	0	1	0	0	0	0	0	0	0	0	0	0	0	835	2064	119	1.09	-0.39	1.01	0.9
hSQ008180	NM_032900	ARHGAP19	84986	1.32	0.37	18.04	-2.32	-0.95	-0.92	52.46	98.79	0.77	0.38	-2.51	14.69	22.96	0.94	0.87	-0.99	108.61	100	6.1	5.52	4	4	1	0	0	0	0	0	0	0	NA	NA	NA	NA	NA	3948	1485	NA	1.37	-0.39	0.92	0.9
hSQ026749	NM_001008397	LOC493869	493869	1.32	0.37	18.08	-1.85	-0.75	-0.62	91.61	100	-0.12	-0.4	-1.38	14.69	39.46	0.88	0.83	-0.3	108.64	100	4.96	4.72	1	1	0	0	0	1	0	0	0	0	NA	NA	NA	NA	NA	705	630	NA	1.1	-0.28	0.94	0.95
hSQ014480	NM_023012	RSRC2	65117	1.32	0.37	18.1	-2.35	-1.42	0.49	84.11	92.83	1.18	1.4	-1.31	14.69	40.73	0.89	0.81	0.87	108.17	100	5.59	6.28	1	1	1	1	1	0	0	0	0	0	0	0	0	0	0	799	1305	146	0.93	0.22	0.92	1.12
hSQ031971	NM_018569	C4orf16	55435	1.32	0.37	18.11	-1.01	-0.02	-0.37	92.38	100	1.14	0.96	0.21	29.81	60.9	0.91	0.92	0.36	108.17	100	3.18	3.42	1	0	0	0	0	0	0	0	0	0	1	0	0	0	0	1640	909	267	0.99	-0.18	1.01	1.08
hSQ031386	NM_014640	TTLL4	9654	1.32	0.37	18.15	2.63	3.95	0.07	90.93	100	1.04	1.08	-0.91	14.69	48.07	0.88	0.86	-0.99	108.61	100	6.91	5.95	0	0	0	0	0	2	2	1	0	0	0	0	0	0	0	296	3600	295	1.32	0.03	0.98	0.86
hSQ042029	NM_001002877	THOC5	8563	1.32	0.37	18.18	-0.06	0.87	0.15	90.93	100	2.06	2.13	-0.17	21.69	58.63	0.88	0.87	-0.34	108.64	100	6.94	6.68	0	0	0	0	0	0	1	0	0	0	0	0	0	0	0	289	2052	204	0.93	0.07	1	0.96
hSQ017536	NM_016282	AK3	50808	1.31	0.37	18.27	-1.82	-0.69	-1.37	15.82	66.07	-1.11	-1.79	0.52	29.81	60.8	0.89	0.91	0.66	108.17	100	3.38	3.75	3	0	0	1	0	0	0	0	0	0	0	0	0	0	0	1818	684	140	1.13	-0.68	1.03	1.11
hSQ035244	NA	LOC339804	339804	1.31	0.37	18.38	-1.06	-0.06	-0.02	92.38	100	1.11	1.11	-0.31	21.69	57.11	0.88	0.86	-0.3	108.64	100	2.91	2.76	NA	NA	NA	NA	NA	NA	NA	NA	NA	NA	NA	NA	NA	NA	NA	NA	NA	NA	1	-0.01	0.98	0.95
hSQ031786	NM_004157	PRKAR2A	5576	1.31	0.37	18.38	-0.95	-0.02	-0.52	92.38	100	2.04	1.78	-1.86	14.69	31.39	0.95	0.91	0.34	108.17	100	5.81	5.98	0	1	0	0	0	0	0	0	0	0	0	0	0	0	0	925	1215	241	0.93	-0.26	0.96	1.03
hSQ023143	NM_001006945	C1orf103	55791	1.31	0.37	18.43	-1.9	-0.61	0.08	90.93	100	-0.56	-0.5	0.74	29.81	59.65	0.84	0.89	0.23	108.17	100	4.82	5.07	0	0	0	0	0	1	1	1	1	1	0	0	0	0	0	769	702	336	1.29	0.06	1.06	1.05
hSQ014309	NM_181491	MED22	6837	1.31	0.37	18.56	2.24	3.17	0.04	90.93	100	1.31	1.33	-1.58	14.69	36.03	0.9	0.83	0.69	108.17	100	4.74	5.11	5	2	1	0	0	0	0	0	0	0	0	0	0	0	0	3214	423	234	0.93	0.02	0.93	1.08
hSQ044988	NM_016462	TMEM14C	51522	1.31	0.37	18.59	-1.09	-0.28	0.29	84.11	100	1.23	1.36	-0.37	21.69	56.4	0.95	0.93	-0.09	108.64	100	4.28	4.24	0	0	0	0	0	1	1	1	0	0	0	0	0	0	0	459	339	181	0.82	0.13	0.98	0.99
hSQ026997	NM_139014	MAPK14	1432	1.31	0.37	18.64	-0.78	0.42	-1.45	13.85	59.57	0.51	-0.44	-2.4	14.69	24.18	0.97	0.91	-0.4	108.64	100	6.48	6.17	1	2	1	1	1	0	0	0	0	0	0	0	0	0	0	2391	924	362	1.2	-0.95	0.93	0.95
hSQ003234	NM_005389	PCMT1	5110	1.31	0.37	18.65	-0.23	1.3	-0.84	58.83	100	2.22	1.76	-1.76	14.69	33	0.97	0.93	-0.49	108.64	100	7.18	6.58	0	0	0	0	0	1	1	1	0	0	0	0	0	0	0	842	684	73	1.53	-0.46	0.95	0.92
hSQ004348	NM_003773	HYAL2	8692	1.3	0.37	18.72	0.92	1.95	0.08	90.93	100	1.06	1.11	-0.94	14.69	47.44	0.96	0.94	-0.1	108.64	100	4.98	4.91	0	0	0	0	0	1	1	0	0	0	0	0	0	0	0	320	1422	105	1.03	0.05	0.98	0.99
hSQ015656	NM_002569	FURIN	5045	1.3	0.37	18.73	0.9	1.92	-1.32	21.42	69.41	-0.54	-1.03	1.46	23.79	50.69	0.81	0.86	0.48	108.17	100	3.81	4.02	1	3	1	0	0	0	1	0	0	0	0	0	0	0	0	1579	2385	216	1.03	-0.49	1.07	1.05
hSQ031331	NM_020807	ZNF319	57567	1.3	0.37	18.76	1.96	2.85	-0.87	58.83	100	0.07	-0.34	0.34	29.81	61.08	0.84	0.85	-0.66	108.64	100	6.33	5.95	1	0	0	0	0	0	1	0	0	0	1	1	1	0	0	1848	1749	623	0.89	-0.41	1.01	0.94
hSQ011739	NM_032927	TMEM128	85013	1.3	0.37	18.77	-1.67	-0.73	-2	4.63	23.62	0.91	0.11	-2.63	14.69	21.78	0.94	0.85	0.29	108.17	100	3.33	3.5	1	2	1	0	0	1	1	1	0	0	1	0	0	0	0	724	426	582	0.94	-0.8	0.9	1.05
hSQ005668	NM_006875	PIM2	11040	1.3	0.37	18.78	2.72	4.39	-0.69	84.11	100	-1.07	-1.39	-1.57	14.69	36.07	0.91	0.85	-1.39	51.15	90.14	5.8	4.92	0	0	0	0	0	0	1	0	0	0	0	0	0	0	0	947	936	173	1.67	-0.32	0.93	0.85
hSQ042814	NM_012110	CHIC2	26511	1.3	0.37	18.8	-2.61	-1.75	-1.5	11.29	55.38	1.34	0.75	-0.44	21.69	55.47	0.88	0.85	-0.68	108.64	100	3.55	3.21	1	1	1	0	0	1	0	0	0	0	0	0	0	0	0	304	498	321	0.86	-0.59	0.97	0.9
hSQ043691	NM_002791	PSMA6	5687	1.3	0.37	18.83	-0.81	0.34	-0.01	92.38	100	1.19	1.18	-1.33	14.69	40.31	0.97	0.94	0.51	108.17	100	7.73	8.35	0	0	0	0	0	0	0	0	0	0	0	1	0	0	0	161	741	109	1.15	-0.01	0.97	1.08
hSQ004771	NM_002582	PARN	5073	1.3	0.37	18.92	-1.08	0.01	-0.3	92.38	100	0.36	0.22	-1.11	14.69	44.37	0.91	0.87	-1.01	108.17	100	7.4	6.69	0	1	0	0	0	1	1	1	0	0	0	0	0	0	0	1015	1920	57	1.08	-0.14	0.96	0.9
hSQ033013	NM_014666	CLINT1	9685	1.3	0.37	18.94	-2.27	-1.42	-0.53	92.38	100	1.44	1.19	-2.94	14.69	19.34	0.96	0.89	-0.65	108.64	100	7.49	7.14	0	0	0	0	0	2	3	1	0	0	0	0	0	0	0	1357	1878	190	0.85	-0.26	0.92	0.95
hSQ045556	NM_019610	CCBL2	56267	1.3	0.37	18.99	-0.91	0.09	-0.37	92.38	100	0.94	0.78	-0.59	21.69	53.29	0.91	0.89	-1.32	59.85	93.75	7.37	6.84	2	0	0	0	0	0	0	0	0	0	0	0	0	0	0	2215	1173	489	1	-0.17	0.98	0.93
hSQ019097	NM_052831	C6orf192	116843	1.3	0.37	19.05	-0.56	0.46	-0.25	92.38	100	2.13	2.02	-0.97	14.69	47.01	0.82	0.78	-0.39	108.64	100	5.13	4.84	0	0	0	0	0	1	1	1	0	0	0	0	0	0	0	902	1371	152	1.02	-0.11	0.95	0.94
hSQ038645	NM_152464	TMEM199	147007	1.3	0.37	19.06	1.27	2.25	1.16	58.83	64.54	2.01	2.53	-0.95	14.69	47.25	0.96	0.94	0.06	108.17	100	5.14	5.17	2	0	0	0	0	1	0	0	0	0	NA	NA	NA	NA	NA	814	627	NA	0.98	0.52	0.97	1.01
hSQ042978	NM_017827	SARS2	54938	1.3	0.37	19.09	0.06	1.02	-0.18	92.38	100	1.56	1.46	-0.18	21.69	58.55	0.84	0.84	0.27	108.17	100	6	6.19	0	0	0	0	0	0	1	0	0	0	1	0	0	0	0	339	1557	160	0.96	-0.1	0.99	1.03
hSQ016837	NA	XM_498236	442344	1.3	0.37	19.1	-0.8	0.26	-1.55	11.29	51.97	3.04	2.44	0.19	29.81	60.84	0.79	0.79	-0.67	108.64	100	5.83	5.2	NA	NA	NA	NA	NA	NA	NA	NA	NA	NA	NA	NA	NA	NA	NA	NA	NA	NA	1.06	-0.61	1	0.89
hSQ027498	NM_022463	NXN	64359	1.3	0.37	19.1	0.94	1.96	-0.38	92.38	100	2.12	1.89	-1.95	14.69	30.02	0.95	0.91	-0.87	108.64	100	6.46	6.01	1	1	1	0	0	0	0	0	0	0	0	0	0	0	0	1603	1308	92	1.01	-0.23	0.96	0.93
hSQ020101	NA	11::11	repname(hSQ020101)	1.3	0.37	19.1	1.28	2.19	-0.06	92.38	100	3	2.97	-0.03	21.69	59.74	0.85	0.84	0.46	108.17	100	4	4.07	NA	NA	NA	NA	NA	NA	NA	NA	NA	NA	NA	NA	NA	NA	NA	NA	NA	NA	0.92	-0.03	1	1.02
hSQ045520	NM_005257	GATA6	2627	1.3	0.37	19.12	2.51	3.53	-0.58	92.3	100	2.26	1.95	0.1	29.81	60.51	0.84	0.84	-1.12	76.95	100	7.55	6.72	2	1	1	0	0	1	1	1	0	0	0	0	0	0	0	1441	1788	265	1.02	-0.31	1	0.89
hSQ039349	NM_018374	TMEM106B	54664	1.3	0.37	19.17	-1.75	-0.76	-0.68	90.93	100	-1.52	-1.92	-0.54	21.69	54.09	0.95	0.93	0.5	108.17	100	5.06	5.54	3	2	1	1	0	1	0	0	0	0	0	0	0	0	0	5282	825	322	1	-0.4	0.97	1.1
hSQ035537	NM_002498	NEK3	4752	1.3	0.37	19.18	-1.4	-0.35	0.21	90.93	100	2.11	2.21	-2.38	14.69	24.42	0.92	0.87	0.01	108.17	100	6.65	6.65	0	0	0	0	0	3	2	1	1	0	0	1	0	0	0	499	1521	376	1.05	0.1	0.94	1
hSQ022279	NM_004130	GYG1	2992	1.29	0.37	19.24	-2.13	-1.19	-0.56	92.38	100	1.06	0.84	-0.43	21.69	55.67	0.89	0.87	0.02	108.17	100	6.89	6.9	0	0	0	0	0	0	0	0	0	0	0	0	0	0	0	698	1053	53	0.94	-0.23	0.97	1
hSQ033881	NM_004475	FLOT2	2319	1.29	0.37	19.26	-0.7	0.25	-0.7	84.11	100	0.09	-0.23	-0.66	21.69	52.27	0.87	0.85	-0.14	108.64	100	5.51	5.43	3	2	2	2	1	0	0	0	0	0	0	0	0	0	0	1221	1287	123	0.95	-0.32	0.98	0.98
hSQ000234	NM_020839	WDR48	57599	1.29	0.37	19.26	-0.63	0.36	0.06	90.93	100	1.24	1.26	-0.6	21.69	53.13	0.92	0.9	-0.19	108.64	100	7.86	7.67	1	1	1	0	0	1	0	0	0	0	NA	NA	NA	NA	NA	1645	2034	NA	1	0.02	0.98	0.98
hSQ028299	NM_058167	UBE2J2	118424	1.29	0.37	19.3	1.32	2.18	-0.15	92.38	100	2.39	2.33	-3.69	9.63	15.98	0.95	0.9	0.95	108.17	100	5.66	6.24	0	0	0	0	0	1	1	1	1	1	0	0	0	0	0	1289	780	189	0.86	-0.06	0.94	1.1
hSQ032232	NM_015986	CRLF3	51379	1.29	0.37	19.31	0.57	1.71	-0.12	92.38	100	1.58	1.53	0.21	29.81	60.92	0.89	0.89	0.53	108.17	100	5.7	6.08	0	0	0	0	0	1	2	1	0	0	0	0	0	0	0	1503	1329	109	1.14	-0.05	1.01	1.07
hSQ027974	NM_016098	BRP44L	51660	1.29	0.37	19.35	-0.44	0.79	0.36	84.11	97.87	2.75	2.9	-0.61	21.69	53.01	0.97	0.94	0.93	108.17	100	3.31	3.82	1	0	0	1	0	0	0	0	0	0	0	0	0	0	0	507	329	122	1.23	0.14	0.97	1.16
hSQ008879	NM_004393	DAG1	1605	1.29	0.37	19.4	0.22	1.26	-0.49	92.38	100	-0.08	-0.33	-1.26	14.69	41.71	0.94	0.91	-0.45	108.64	100	8.14	7.78	4	0	0	0	0	3	3	0	0	0	0	0	0	0	0	2416	2688	418	1.04	-0.25	0.97	0.96
hSQ018968	NM_138346	KIAA2013	90231	1.29	0.37	19.41	0.45	1.62	-0.82	65.69	100	0.17	-0.15	-0.26	21.69	57.7	0.85	0.84	-0.46	108.64	100	5.04	4.73	1	1	1	0	0	0	0	0	0	0	0	0	0	0	0	247	1905	186	1.17	-0.32	0.99	0.94
hSQ031425	NM_148178	C9orf23	138716	1.29	0.37	19.51	-0.73	0.15	-1.85	5.84	31.55	2.65	1.78	-2.3	14.69	25.28	0.9	0.82	0.05	108.17	100	6.03	6.07	3	1	1	0	0	0	1	0	0	0	0	0	0	0	0	309	492	77	0.88	-0.87	0.91	1.01
hSQ008771	NM_013363	PCOLCE2	26577	1.29	0.37	19.53	-0.87	-0.04	0.23	90.93	100	0.39	0.47	-0.95	14.69	47.26	0.93	0.9	0.38	108.17	100	5.45	5.68	1	0	0	0	0	1	0	0	1	0	0	0	0	0	0	465	1248	196	0.84	0.08	0.97	1.04
hSQ035993	NM_004329	BMPR1A	657	1.29	0.37	19.58	0.56	1.4	-1.98	5.14	24.51	0.13	-0.65	0.84	29.12	58.82	0.79	0.81	-0.67	108.64	100	4.89	4.43	2	1	0	0	0	1	0	0	0	0	0	0	0	0	0	1468	1599	548	0.84	-0.78	1.03	0.91
hSQ008527	NM_015975	TAF9B	51616	1.29	0.37	19.63	-1.82	-0.98	-0.09	92.38	100	1.68	1.63	1.42	25.16	51.3	0.81	0.88	0.18	108.17	100	5.61	5.79	1	0	0	0	0	1	0	0	0	0	0	0	0	0	0	1861	756	71	0.84	-0.06	1.07	1.03
hSQ034052	NM_015565	ZNF294	26046	1.29	0.37	19.68	-0.05	1	-0.71	84.11	100	-0.21	-0.62	-0.13	21.69	58.94	0.84	0.83	0.18	108.17	100	6.36	6.46	1	1	0	0	0	2	1	0	0	0	0	0	0	0	0	2304	5301	98	1.05	-0.41	0.99	1.02
hSQ013318	NM_130809	PRRC1	133619	1.28	0.37	19.74	0.54	2.1	-0.82	65.69	100	0.29	-0.18	0.9	28.63	58.2	0.85	0.9	-0.2	108.64	100	8	7.65	2	0	0	1	0	3	2	1	0	0	0	0	0	0	0	3164	1338	141	1.55	-0.47	1.07	0.96
hSQ027845	NM_147189	FAM110B	90362	1.28	0.37	19.76	1.57	2.4	-0.51	92.38	100	0.86	0.65	0.7	29.81	59.87	0.86	0.88	-0.32	108.64	100	5.65	5.42	2	0	0	0	0	0	0	0	0	0	0	0	0	0	0	2375	1113	880	0.83	-0.21	1.02	0.96
hSQ038383	NM_002886	RAP2B	5912	1.28	0.37	19.85	0.89	2.06	-0.41	92.38	100	0.56	0.36	-0.52	21.69	54.31	0.82	0.79	-0.22	108.64	100	4.13	4.03	4	2	1	2	0	0	0	0	0	0	0	0	0	0	0	5227	552	454	1.18	-0.2	0.96	0.98
hSQ028839	NM_016162	ING4	51147	1.28	0.37	19.86	0.2	1.21	0.21	90.93	100	-0.01	0.09	0.27	29.81	61.03	0.75	0.77	0.69	108.17	100	5.13	5.68	0	1	0	0	0	1	0	0	0	0	NA	NA	NA	NA	NA	915	747	NA	1.01	0.1	1.02	1.11
hSQ026526	NM_017546	C2orf29	55571	1.28	0.37	19.9	-1.52	-0.62	-1.78	7.95	36.25	0.87	0.05	-2.78	14.69	20.49	0.91	0.83	-0.79	108.64	100	6.01	5.72	1	1	1	0	0	0	0	0	0	0	NA	NA	NA	NA	NA	901	1533	NA	0.89	-0.82	0.91	0.95
hSQ028684	NM_153686	LCORL	254251	1.28	0.37	19.92	0.52	1.83	-1.44	13.85	60.46	0.72	0.16	1.82	22.31	44.39	0.73	0.84	-0.67	108.64	100	5.41	4.99	0	1	0	0	0	1	1	1	1	1	NA	NA	NA	NA	NA	2501	957	NA	1.31	-0.56	1.15	0.92
hSQ038913	NM_007282	RNF13	11342	1.28	0.37	20.12	-0.07	0.76	-0.36	92.38	100	-0.69	-0.88	1.21	26.68	54.59	0.74	0.82	0.41	108.17	100	4.51	4.78	0	0	0	0	0	0	1	0	0	0	1	1	1	0	0	1034	1146	784	0.83	-0.19	1.1	1.06
hSQ012899	NM_005349	RBPJ	3516	1.28	0.37	20.18	-1.05	-0.16	0.43	84.11	95.15	-0.68	-0.42	-1.66	14.69	34.58	0.95	0.89	-0.7	108.64	100	6.41	5.92	0	0	0	0	0	1	2	1	0	0	0	0	0	0	0	649	1503	236	0.89	0.26	0.93	0.92
hSQ032383	NM_004329	BMPR1A	657	1.28	0.37	20.2	0.92	1.95	-1.65	9.09	44.76	0.27	-0.58	0.78	29.71	59.31	0.79	0.81	-0.64	108.64	100	4.78	4.31	2	1	0	0	0	1	0	0	0	0	0	0	0	0	0	1468	1599	548	1.03	-0.86	1.03	0.9
hSQ045182	NM_152573	RASEF	158158	1.28	0.37	20.2	1.1	2.13	0.1	90.93	100	3.21	3.25	-0.43	21.69	55.57	0.94	0.92	-1.13	76.95	100	7.61	6.53	0	0	0	0	0	0	0	0	0	0	0	1	0	0	0	275	2223	261	1.04	0.04	0.98	0.86
hSQ010447	NM_005700	DPP3	10072	1.27	0.37	20.32	-1.07	-0.19	0.02	90.93	100	0.61	0.62	-1.56	14.69	36.25	0.9	0.86	-0.01	108.64	100	8.22	8.21	0	0	0	0	0	0	1	0	0	0	0	0	0	0	0	408	2214	62	0.87	0.01	0.96	1
hSQ042287	NM_015627	LDLRAP1	26119	1.27	0.37	20.34	2.47	3.69	-1.86	5.84	31.26	1.05	0.17	-1.69	14.69	34.07	0.89	0.85	-0.28	108.64	100	4.29	4.16	3	4	1	0	0	0	1	0	0	0	0	0	0	0	0	1894	927	114	1.21	-0.88	0.95	0.97
hSQ041102	NA	ZNF268	10795	1.27	0.37	20.36	0.62	1.75	0.1	90.93	100	-0.53	-0.46	1.86	22.31	43.67	0.69	0.83	0.49	108.17	100	5.04	5.32	NA	NA	NA	NA	NA	NA	NA	NA	NA	NA	NA	NA	NA	NA	NA	NA	NA	NA	1.13	0.06	1.2	1.06
hSQ032058	NM_003142	SSB	6741	1.27	0.37	20.46	-1.62	-0.6	-0.06	92.38	100	1.56	1.5	0.37	29.81	61.07	0.91	0.93	0.16	108.17	100	7.79	8.11	1	0	0	0	0	0	0	0	0	0	0	0	0	0	0	309	1227	107	1.02	-0.06	1.03	1.04
hSQ022910	NM_015484	SYF2	25949	1.27	0.37	20.49	-1.38	-0.49	-0.63	91.61	100	1.27	0.97	-1.03	14.69	45.82	0.86	0.84	-0.34	108.64	100	6.4	6.06	1	0	0	0	0	1	1	1	0	0	0	0	0	0	0	988	732	55	0.89	-0.3	0.97	0.95
hSQ043405	NM_007221	PMF1	11243	1.27	0.37	20.51	-0.28	0.5	-0.06	92.38	100	1.9	1.87	-1.21	14.69	42.56	0.93	0.9	-0.53	108.64	100	5.92	5.59	1	1	1	0	0	1	0	0	0	0	NA	NA	NA	NA	NA	439	618	NA	0.78	-0.03	0.96	0.95
hSQ021442	NM_020156	C1GALT1	56913	1.27	0.37	20.53	-2.6	-1.8	-0.23	92.38	100	-1.48	-1.58	1.59	22.99	48.59	0.81	0.87	0.26	108.17	100	4.01	4.19	1	0	0	1	0	0	0	0	0	0	0	0	0	0	0	621	1092	62	0.81	-0.11	1.08	1.05
hSQ017486	NM_004354	CCNG2	901	1.27	0.37	20.63	0.47	1.45	-0.19	92.38	100	-0.96	-1.05	1.16	26.68	55.23	0.55	0.69	0.13	108.17	100	2.72	2.79	0	1	0	0	0	2	1	1	1	0	0	0	0	0	0	869	1035	133	0.98	-0.09	1.24	1.02
hSQ004330	NM_005827	SLC35B1	10237	1.27	0.37	20.63	-2.31	-1.18	0.45	84.11	94.41	3.1	3.32	-0.54	21.69	54.06	0.8	0.78	0.56	108.17	100	4.09	4.42	0	0	0	0	0	1	0	0	1	0	0	0	0	0	0	130	969	87	1.13	0.21	0.97	1.08
hSQ018687	NA	mtRNA_ND2	repname(hSQ018687)	1.27	0.37	20.65	-0.27	1.26	-0.16	92.38	100	3.32	3.16	-1.92	14.69	30.42	0.79	0.47	0.22	108.17	100	4.51	4.56	NA	NA	NA	NA	NA	NA	NA	NA	NA	NA	NA	NA	NA	NA	NA	NA	NA	NA	1.53	-0.16	0.6	1.01
hSQ024658	NM_024761	MOBKL2B	79817	1.27	0.37	20.65	-0.61	0.29	-0.92	52.46	99.11	-1.48	-1.96	-0.27	21.69	57.61	0.86	0.83	0.35	108.17	100	3.77	4.09	5	0	0	1	0	0	0	0	0	0	1	1	1	0	0	5377	651	496	0.9	-0.48	0.97	1.08
hSQ033168	NM_007026	DUSP14	11072	1.26	0.37	20.74	1.86	2.96	-0.29	92.38	100	2.19	2.06	0.28	29.81	61.04	0.85	0.86	-0.45	108.64	100	5.57	5.23	1	0	0	0	0	1	2	0	1	0	0	0	0	0	0	617	597	294	1.1	-0.13	1.01	0.94
hSQ035347	NM_183376	ARRDC4	91947	1.26	0.37	20.82	0.02	0.97	-1.78	7.95	35.98	-0.23	-0.97	-0.78	19.17	50.18	0.87	0.84	-0.37	108.64	100	4.92	4.6	3	1	0	1	0	0	0	0	0	0	0	0	0	0	0	2643	1257	144	0.95	-0.75	0.97	0.94
hSQ022336	NM_017850	C1orf109	54955	1.26	0.37	20.86	0.37	1.51	-0.57	92.3	100	1.55	1.27	-0.41	21.69	55.87	0.92	0.91	-0.35	108.64	100	5.02	4.73	3	1	1	0	0	0	0	0	0	0	0	0	0	0	0	1545	612	190	1.14	-0.28	0.98	0.94
hSQ038945	NM_006750	SNTB2	6645	1.26	0.37	20.96	-1.3	-0.39	-0.54	92.38	100	-0.25	-0.49	-3.01	9.63	18.86	0.95	0.88	-0.83	108.64	100	6.09	5.61	8	4	2	0	0	0	0	0	0	0	NA	NA	NA	NA	NA	8127	1623	NA	0.91	-0.24	0.93	0.92
hSQ003568	NA	LOC283970	283970	1.26	0.37	20.98	0.79	1.57	0.45	84.11	94.39	-1.15	-0.94	0.52	29.81	60.77	0.63	0.68	-0.4	108.64	100	3.33	3.06	NA	NA	NA	NA	NA	NA	NA	NA	NA	NA	NA	NA	NA	NA	NA	NA	NA	NA	0.77	0.21	1.08	0.92
hSQ006194	NM_032574	DPY30	84661	1.26	0.37	20.99	-0.09	1.13	-0.29	92.38	100	2.05	1.91	-1.37	14.69	39.67	1	0.96	-0.36	108.64	100	4.58	4.31	0	0	0	0	0	0	2	0	0	0	0	0	0	0	0	281	300	219	1.22	-0.14	0.97	0.94
hSQ015973	NM_001455	FOXO3	2309	1.26	0.37	21.08	-0.25	0.51	-0.18	92.38	100	-0.23	-0.31	-1.24	14.69	42.08	0.94	0.9	-0.22	108.64	100	6.64	6.4	3	0	0	0	0	1	1	1	0	0	0	0	0	0	0	4976	2022	343	0.76	-0.08	0.95	0.96
hSQ014267	NM_148893	SVIP	258010	1.26	0.37	21.15	-1.24	-0.22	-0.58	91.91	100	0.45	0.13	1.07	27.27	56.35	0.67	0.87	0.56	108.17	100	1.96	2.26	1	1	1	0	0	0	0	0	0	0	0	0	0	0	0	1067	234	88	1.02	-0.32	1.3	1.15
hSQ008584	NM_016598	ZDHHC3	51304	1.26	0.37	21.22	-0.41	0.42	0.69	74.83	84.22	1.25	1.63	0.74	29.81	59.62	0.77	0.88	0.22	108.17	100	3.21	3.32	2	0	0	1	0	0	0	0	0	0	0	0	0	0	0	1520	984	214	0.83	0.38	1.15	1.04
hSQ016394	NM_138571	HINT3	135114	1.26	0.37	21.26	2.3	3.31	-1.08	35.24	88.3	0.68	-0.04	1.91	22.31	42.77	0.63	0.78	-0.31	108.64	100	3.68	3.33	0	0	0	0	0	0	0	0	0	0	0	0	0	0	0	751	549	188	1.01	-0.71	1.24	0.91
hSQ016410	NM_138333	FAM122A	116224	1.25	0.37	21.39	2.3	3.22	-1.2	25.69	78.98	1.63	1.02	0.92	28.01	58.09	0.57	0.63	-0.46	108.64	100	3.86	3.64	3	2	1	1	0	0	0	0	0	0	0	0	0	0	0	2665	864	117	0.92	-0.62	1.11	0.94
hSQ002025	NA	LRRC37B2	147172	1.25	0.37	21.43	-0.25	0.69	-0.27	92.38	100	0.31	0.18	4.08	5.86	10.46	0.76	0.83	-0.1	108.64	100	3.7	3.66	NA	NA	NA	NA	NA	NA	NA	NA	NA	NA	NA	NA	NA	NA	NA	NA	NA	NA	0.94	-0.13	1.1	0.99
hSQ016968	NM_001042610	DBNDD1	79007	1.25	0.37	21.47	0.42	1.57	0.34	84.11	98.95	0.21	0.38	2.26	21.69	36.12	0.62	0.76	-0.27	108.64	100	4.25	4.08	0	0	0	0	0	0	0	0	0	0	0	0	0	0	0	1462	477	188	1.16	0.16	1.23	0.96
hSQ028459	NM_023010	UPF3B	65109	1.25	0.37	21.49	-1.51	-0.6	-0.07	92.38	100	2.55	2.51	-1.48	14.69	37.61	0.98	0.94	-0.54	108.64	100	8.71	8.15	1	1	1	0	0	0	0	0	0	0	0	0	0	0	0	852	1413	77	0.91	-0.04	0.96	0.94
hSQ007099	NM_006977	ZBTB25	7597	1.25	0.37	21.49	0.93	1.88	0.01	90.93	100	-1.55	-1.55	3.33	8.9	18.5	0.55	0.72	0.34	108.17	100	3.62	3.9	0	0	0	0	0	2	1	1	1	1	0	0	0	0	0	84	1308	183	0.95	0	1.29	1.08
hSQ001223	NM_024585	ARMC7	79637	1.25	0.37	21.49	-0.61	0.38	-0.1	92.38	100	1.47	1.42	-1.31	14.69	40.82	0.91	0.88	0.08	108.17	100	6.04	6.08	2	2	1	0	0	0	0	0	0	0	0	0	0	0	0	1227	597	302	0.99	-0.05	0.97	1.01
hSQ000975	NA	LOC158563	158563	1.25	0.37	21.51	1.44	2.34	-0.29	92.38	100	-0.92	-1.09	0.04	29.81	60.22	0.89	0.89	0.16	108.17	100	6.28	6.4	NA	NA	NA	NA	NA	NA	NA	NA	NA	NA	NA	NA	NA	NA	NA	NA	NA	NA	0.9	-0.17	1	1.02
hSQ030383	NM_001008566	TPST2	8459	1.25	0.37	21.52	1.03	1.9	-0.79	65.69	100	-0.16	-0.49	0.93	28.01	57.93	0.79	0.85	-0.09	108.64	100	3.29	3.25	2	2	1	1	1	0	2	0	0	0	0	0	0	0	0	525	1134	341	0.87	-0.33	1.07	0.99
hSQ041251	NM_017993	ENOX1	55068	1.25	0.37	21.52	-0.05	0.89	-0.63	91.61	100	2.32	2.03	-0.17	21.69	58.61	0.9	0.9	-0.37	108.64	100	5.99	5.81	1	0	0	0	0	2	1	1	1	0	0	0	0	0	0	422	1932	270	0.93	-0.29	0.99	0.97
hSQ041537	NM_002875	RAD51	5888	1.25	0.37	21.55	-0.31	0.65	-2.29	3.76	12.02	1.02	0.04	-2.98	9.63	19.04	0.94	0.86	-1.61	37.98	77.75	7.51	6.63	1	2	1	1	1	0	0	0	0	0	0	0	0	0	0	980	1020	267	0.96	-0.99	0.91	0.88
hSQ030576	NM_001564	ING2	3622	1.25	0.37	21.57	-1.59	-0.75	-0.14	92.38	100	0.43	0.35	-1.73	14.69	33.48	0.84	0.78	0.25	108.17	100	3.71	3.86	0	0	0	0	0	0	0	0	0	0	0	0	0	0	0	144	843	129	0.83	-0.08	0.93	1.04
hSQ013020	NM_001006656	ZNF473	25888	1.25	0.37	21.65	1.81	2.72	-0.32	92.38	100	1.13	1.01	1.21	26.28	54.52	0.73	0.79	-0.3	108.64	100	4.19	4.03	0	1	0	0	0	2	1	0	0	0	0	0	0	0	0	1713	2616	237	0.9	-0.12	1.09	0.96
hSQ015649	NM_138350	THAP3	90326	1.25	0.37	21.68	2.05	3.34	-0.36	92.38	100	1.45	1.24	1.12	26.68	55.77	0.77	0.83	0.37	108.17	100	3.62	3.86	1	1	1	0	0	0	0	0	0	0	NA	NA	NA	NA	NA	1497	528	NA	1.29	-0.21	1.08	1.07
hSQ020323	NM_014330	PPP1R15A	23645	1.25	0.37	21.71	0.12	1.2	-0.01	92.38	100	-0.05	-0.05	0.38	29.81	61.06	0.82	0.83	-0.06	108.64	100	3.69	3.65	0	0	0	0	0	3	1	1	0	0	0	0	0	0	0	84	2025	240	1.07	0	1.02	0.99
hSQ014635	NM_020375	C12orf5	57103	1.25	0.37	21.74	-2.09	-1.2	-0.45	92.38	100	1.32	1.13	-0.64	21.69	52.58	0.9	0.88	0.13	108.17	100	5.66	5.74	4	4	1	0	0	0	0	0	0	0	0	0	0	0	0	7331	813	79	0.89	-0.19	0.98	1.01
hSQ006558	NM_000917	P4HA1	5033	1.25	0.37	21.74	-1.9	-0.93	-1.63	9.09	46.2	-1.16	-2.01	-0.89	19.17	48.42	0.82	0.77	-2.75	27.18	33.58	8.12	6.59	2	2	1	2	1	0	1	0	0	0	0	0	0	0	0	998	1605	133	0.97	-0.85	0.93	0.81
hSQ014137	NM_001098817	C18orf37	125476	1.25	0.37	21.77	-1.56	-0.49	-4.03	0	1.01	3.05	1.43	-3.59	9.63	16.24	0.94	0.84	-0.51	108.64	100	5.65	5.31	1	1	1	0	0	2	2	1	0	0	0	0	0	0	0	284	687	117	1.07	-1.62	0.89	0.94
hSQ032679	NM_014612	FAM120A	23196	1.24	0.37	21.85	-1.77	-0.68	-0.33	92.38	100	-0.26	-0.41	-0.48	21.69	54.86	0.86	0.84	-1.04	108.17	100	4.66	4.1	1	0	0	0	0	4	3	2	0	0	NA	NA	NA	NA	NA	1574	3357	NA	1.09	-0.15	0.98	0.88
hSQ013456	NM_004555	NFATC3	4775	1.24	0.71	21.93	2.34	3.49	-0.58	91.91	100	0.31	-0.02	-1.41	14.69	38.87	0.95	0.89	-0.49	108.64	100	6.11	5.81	0	0	0	0	0	1	1	0	1	0	0	0	0	0	0	588	3207	210	1.16	-0.33	0.94	0.95
hSQ042676	NM_001018837	HAX1	10456	1.24	0.71	21.95	0.4	1.43	-0.36	92.38	100	2.71	2.46	-1.98	14.69	29.55	0.98	0.93	0.42	108.17	100	5.46	5.76	0	0	0	0	0	2	0	0	0	0	0	0	0	0	0	172	696	161	1.03	-0.26	0.95	1.06
hSQ042652	NM_012297	G3BP2	9908	1.24	0.71	21.99	-1.63	-0.84	-0.87	58.83	100	1.56	0.99	-1.84	14.69	31.72	0.94	0.9	-0.33	108.64	100	9.39	9.16	2	1	1	0	0	0	0	0	0	0	0	0	0	0	0	2647	1449	140	0.79	-0.57	0.96	0.98
hSQ040142	NA	POLG2	11232	1.24	0.71	22	-0.45	1.04	-0.21	92.38	100	0.57	0.42	0.39	29.81	61.06	0.79	0.83	0.19	108.17	100	3.85	3.99	NA	NA	NA	NA	NA	NA	NA	NA	NA	NA	NA	NA	NA	NA	NA	NA	NA	NA	1.49	-0.15	1.05	1.04
hSQ014586	NM_003692	TMEFF1	8577	1.24	0.71	22.14	1.79	3.09	-2.01	4.63	23.09	0.23	-0.89	-0.5	21.69	54.58	0.9	0.89	0.49	108.17	100	3.63	4	0	0	0	0	0	1	0	0	0	0	0	0	0	0	0	1032	1143	110	1.3	-1.12	0.99	1.1
hSQ043736	NM_031892	SH3KBP1	30011	1.24	0.71	22.26	0.52	1.43	-0.7	84.11	100	-1.31	-1.63	1.28	26.28	53.46	0.62	0.69	-0.24	108.64	100	4.39	4.2	1	1	1	0	0	0	0	0	0	0	0	0	0	0	0	1015	1998	291	0.92	-0.32	1.1	0.96
hSQ034571	NM_015305	ANGEL1	23357	1.24	0.71	22.27	0.25	1.26	-0.43	92.38	100	1.05	0.89	-0.63	21.69	52.68	0.92	0.9	-0.05	108.64	100	5.64	5.6	2	2	0	1	0	1	0	0	0	0	0	0	0	0	0	1985	2013	60	1.01	-0.16	0.98	0.99
hSQ009987	NM_015270	ADCY6	112	1.24	0.71	22.34	-1.1	0.01	-0.46	92.38	100	-0.88	-1.05	-1.33	14.69	40.32	0.93	0.87	-1.61	37.98	77.77	5.67	4.83	2	2	0	0	0	2	2	1	0	0	0	1	0	0	0	2393	3507	695	1.12	-0.17	0.94	0.85
hSQ016006	NM_001033028	CYFIP1	23191	1.24	0.71	22.35	1.1	2.18	-1.03	35.24	91.35	-0.21	-0.68	-1	14.69	46.3	0.89	0.85	-0.71	108.64	100	8.7	8.21	1	0	0	0	0	1	1	1	0	0	0	0	0	0	0	562	2469	302	1.08	-0.48	0.96	0.94
hSQ029621	NM_001609	ACADSB	36	1.23	0.71	22.43	-0.28	0.55	-1	43.3	93.45	-0.24	-0.76	-1.14	14.69	43.84	0.91	0.88	-0.28	108.64	100	6.83	6.67	2	2	1	0	0	1	0	0	0	0	0	0	0	0	0	4524	1299	117	0.83	-0.53	0.96	0.98
hSQ015602	NM_007085	FSTL1	11167	1.23	0.71	22.49	1.13	1.98	-0.15	92.38	100	-1.63	-1.74	-1.66	14.69	34.58	0.96	0.92	-0.41	108.64	100	7.5	7.17	2	2	2	1	1	0	2	0	0	0	0	0	0	0	0	2672	927	82	0.85	-0.11	0.96	0.96
hSQ018406	NM_198476	C19orf54	284325	1.23	0.71	22.51	-0.12	0.75	0.08	90.93	100	0.87	0.92	1.37	25.16	52.16	0.66	0.72	-0.51	108.64	100	5	4.69	0	1	0	0	0	0	0	0	0	0	0	0	0	0	0	1577	642	437	0.87	0.05	1.08	0.94
hSQ023255	NM_182757	RNF144B	255488	1.23	0.71	22.56	0.21	1.27	-0.45	92.38	100	-0.24	-0.5	0.13	29.81	60.66	0.85	0.85	-0.66	108.64	100	5.61	5.06	0	4	0	0	0	1	1	0	0	0	0	0	0	0	0	3550	912	304	1.06	-0.26	1.01	0.9
hSQ030229	NM_024528	NKAP	79576	1.23	0.71	22.56	-1.28	-0.52	-2.02	4.63	22.42	2.25	1.37	-2.27	14.69	25.62	0.98	0.92	-1.78	34.95	68.15	7.05	6.14	1	1	1	0	0	0	0	0	0	0	0	0	0	0	0	159	1248	167	0.76	-0.88	0.94	0.87
hSQ038170	NM_004603	STX1A	6804	1.23	0.71	22.59	0.28	1.4	0.53	84.11	90.87	-0.03	0.27	1.12	26.68	55.75	0.46	0.59	0.19	108.17	100	3.77	3.94	2	0	0	0	0	0	0	0	0	0	NA	NA	NA	NA	NA	1196	867	NA	1.11	0.31	1.27	1.05
hSQ041599	NM_144781	PDCD2	5134	1.23	0.71	22.61	-0.28	0.55	-0.43	92.38	100	1.89	1.71	-0.33	21.69	56.89	0.89	0.88	0.43	108.17	100	3.81	4.06	1	3	0	0	0	0	0	0	0	0	1	0	0	0	0	1280	687	79	0.83	-0.18	0.99	1.07
hSQ033956	NM_025109	MYO19	80179	1.23	0.71	22.63	0.75	1.69	0.03	90.93	100	-0.37	-0.35	-1.55	14.69	36.4	0.89	0.82	-0.95	108.64	100	5.01	4.46	2	1	1	0	0	3	1	0	0	0	0	0	0	0	0	495	2313	432	0.94	0.01	0.92	0.89
hSQ038377	NM_002756	MAP2K3	5606	1.23	0.71	22.68	0.04	1.2	-0.47	92.38	100	0.46	0.28	-1.88	14.69	31.09	0.91	0.86	-1.42	51.15	88.67	5.04	4.27	0	2	0	0	0	1	1	0	0	0	0	0	0	0	0	1007	957	337	1.17	-0.18	0.94	0.85
hSQ033012	NM_001037334	USP14	9097	1.23	0.71	22.79	1.12	2.24	-0.58	92.3	100	0.2	-0.08	-0.42	21.69	55.7	0.92	0.91	-0.16	108.64	100	8.44	8.31	4	1	1	2	1	2	2	1	0	0	0	0	0	0	0	2455	1380	216	1.12	-0.27	0.99	0.98
hSQ019618	NM_000098	CPT2	1376	1.23	0.71	22.8	-0.75	0.06	-0.25	92.38	100	0.67	0.57	-1.07	14.69	45.12	0.93	0.91	-0.14	108.64	100	8.38	8.3	0	1	0	0	0	3	1	1	2	0	0	1	0	0	0	600	1977	515	0.81	-0.1	0.98	0.99
hSQ004344	NA	PTTG2	10744	1.23	0.71	22.83	-3.36	-1.07	0.53	84.11	91.12	0.14	0.36	-1.16	14.69	43.52	0.94	0.9	-0.59	108.64	100	5.01	4.68	NA	NA	NA	NA	NA	NA	NA	NA	NA	NA	NA	NA	NA	NA	NA	NA	NA	NA	2.29	0.22	0.96	0.93
hSQ018985	NA	mtRNA_ND4	repname(hSQ018985)	1.23	0.71	22.88	-0.43	0.44	0.24	90.93	100	0.8	1.04	-1.12	14.69	44.3	0.59	0.37	0.3	108.17	100	3.5	3.69	NA	NA	NA	NA	NA	NA	NA	NA	NA	NA	NA	NA	NA	NA	NA	NA	NA	NA	0.87	0.24	0.64	1.05
hSQ000598	NM_002719	PPP2R5C	5527	1.22	0.71	22.92	0.09	1.16	0.13	90.93	100	0.93	1	1.77	22.31	45.25	0.66	0.78	-0.12	108.64	100	5.57	5.5	2	0	0	0	0	1	0	0	1	0	2	0	0	1	0	2466	1575	108	1.08	0.06	1.17	0.99
hSQ037903	NM_017921	NPLOC4	55666	1.22	0.71	22.99	1.7	2.72	-0.1	92.38	100	0.73	0.67	-1.59	14.69	35.78	0.93	0.9	-0.19	108.64	100	6.37	6.23	1	2	0	1	0	0	1	0	0	0	0	0	0	0	0	2370	1827	132	1.02	-0.06	0.97	0.98
hSQ008361	NA	LOC145842	145842	1.22	0.71	23.05	1.34	2.19	-0.58	91.91	100	-1.71	-2.07	-1.3	14.69	40.89	0.88	0.85	-0.37	108.64	100	4.96	4.72	NA	NA	NA	NA	NA	NA	NA	NA	NA	NA	NA	NA	NA	NA	NA	NA	NA	NA	0.85	-0.36	0.97	0.95
hSQ030037	NM_004996	ABCC1	4363	1.22	0.71	23.17	-0.26	0.91	0.04	90.93	100	-1.1	-1.08	-0.34	21.69	56.72	0.87	0.86	-1.83	34.95	65.78	6.51	5.77	0	0	0	0	0	2	4	1	0	0	0	0	0	0	0	1792	4596	175	1.17	0.02	0.99	0.89
hSQ044779	NM_006527	SLBP	7884	1.22	0.71	23.24	0.96	1.97	-1.17	30.1	81.48	1.84	1.35	-1.47	14.69	37.92	0.97	0.92	0.1	108.17	100	7.26	7.38	1	0	0	1	0	0	0	0	0	0	0	0	0	0	0	797	813	115	1.01	-0.49	0.95	1.02
hSQ018368	NM_022121	PERP	64065	1.21	0.71	23.5	-0.44	0.7	-0.02	92.38	100	0.72	0.71	-0.31	21.69	57.16	0.94	0.93	-0.17	108.64	100	5.41	5.27	0	0	0	0	0	2	1	1	0	0	0	0	0	0	0	1253	582	110	1.14	-0.01	0.99	0.97
hSQ000952	NA	LOC441885	441885	1.21	0.71	23.51	-2.11	-1.28	-0.48	92.38	100	1.27	1.04	-0.08	21.69	59.35	0.89	0.88	0.04	108.17	100	6.93	6.95	NA	NA	NA	NA	NA	NA	NA	NA	NA	NA	NA	NA	NA	NA	NA	NA	NA	NA	0.83	-0.23	1	1
hSQ038274	NM_144607	CYB5D1	124637	1.21	0.71	23.82	0.29	1.25	-0.23	92.38	100	2.64	2.54	-2.14	14.69	27.37	0.85	0.79	-1.45	48.64	86.57	5.07	4.28	3	3	1	0	0	0	0	0	0	0	0	0	0	0	0	2670	687	140	0.96	-0.1	0.92	0.84
hSQ021377	NM_031465	C12orf32	83695	1.21	0.71	23.98	-1.39	-0.56	-0.38	92.38	100	1.32	1.15	-0.03	21.69	59.79	0.85	0.85	0.23	108.17	100	3.72	3.83	0	0	0	0	0	0	0	0	0	0	0	0	0	0	0	999	717	144	0.83	-0.17	1	1.03
hSQ018627	NM_002154	HSPA4	3308	1.21	0.71	24.01	-1.28	-0.51	0.03	90.93	100	1.89	1.91	-1.62	14.69	35.18	0.99	0.94	-0.59	108.64	100	12.76	12.09	0	0	0	0	0	2	1	1	1	0	0	0	0	0	0	580	2523	281	0.77	0.02	0.95	0.95
hSQ009037	NM_001077700	MIER1	57708	1.2	0.71	24.03	-0.09	0.94	0.03	90.93	100	1.66	1.68	-0.22	21.69	58.15	0.9	0.89	0.02	108.17	100	4.6	4.61	2	0	0	0	0	0	0	0	0	0	0	1	0	0	0	3719	1536	232	1.03	0.02	0.99	1
hSQ011741	NM_052845	MMAB	326625	1.2	0.71	24.24	0.34	1.34	0.01	90.93	100	-0.16	-0.16	-1.78	14.69	32.56	0.94	0.89	-0.43	108.64	100	4.49	4.26	3	3	1	0	0	1	1	0	0	0	0	0	0	0	0	3312	753	73	0.99	0	0.95	0.95
hSQ017587	NM_015516	TSKU	25987	1.2	0.71	24.43	3.12	4.66	-1.36	15.82	66.7	-1.42	-2.07	0.19	29.81	60.87	0.54	0.55	-0.08	108.64	100	4.09	4.05	2	1	1	0	0	3	1	1	0	0	0	0	0	0	0	1475	1062	172	1.54	-0.65	1.02	0.99
hSQ042925	NM_003310	TSSC1	7260	1.2	0.71	24.45	-2.25	-1.14	-0.27	92.38	100	1.17	1.04	-1.16	14.69	43.56	0.91	0.86	0.52	108.17	100	4	4.41	0	0	0	0	0	1	1	1	1	1	0	0	0	0	0	362	1164	138	1.12	-0.13	0.95	1.1
hSQ016932	NM_145858	CRYZL1	9946	1.2	0.71	24.56	-1.49	-0.64	0.37	84.11	97.51	0.72	0.89	-0.79	19.17	50.05	0.85	0.82	-0.09	108.64	100	6.43	6.37	0	0	0	0	0	2	2	1	0	0	0	0	0	0	0	478	1050	180	0.85	0.16	0.97	0.99
hSQ000308	NM_002225	IVD	3712	1.19	0.71	24.59	-0.85	0	0.19	90.93	100	2.74	2.83	-1.71	14.69	33.73	0.95	0.9	0.2	108.17	100	6.48	6.6	0	0	0	0	0	0	0	0	0	0	0	0	0	0	0	601	1272	343	0.84	0.09	0.95	1.02
hSQ003271	NM_020992	PDLIM1	9124	1.19	0.71	24.63	0.35	1.62	-0.25	92.38	100	1.04	0.89	-2.06	14.69	28.4	0.92	0.88	-0.26	108.64	100	7.57	7.34	1	0	0	0	0	0	0	0	0	0	0	0	0	0	0	350	990	109	1.28	-0.15	0.95	0.97
hSQ043795	NM_016606	REEP2	51308	1.19	0.71	24.67	1.03	2.12	-0.08	92.38	100	1.91	1.85	3.27	8.9	19.36	0.32	0.68	0.56	108.17	100	2.81	3.16	1	2	1	0	0	1	0	0	0	0	0	0	0	0	0	1217	759	122	1.1	-0.06	2.12	1.12
hSQ036684	NM_024592	SRD5A3	79644	1.19	0.71	24.73	-1.39	-0.57	-0.02	92.38	100	1.76	1.75	-2.19	14.69	26.61	0.93	0.87	0.75	108.17	100	4.52	4.94	0	0	0	0	0	2	2	1	1	1	0	0	0	0	0	1220	957	95	0.82	-0.01	0.94	1.09
hSQ020394	NM_003672	CDC14A	8556	1.19	0.71	24.74	1.47	2.82	-0.58	92.3	100	-1.92	-2.27	0.97	28.01	57.5	0.7	0.84	-0.06	108.64	100	5.07	5.03	1	1	0	0	0	1	2	1	1	1	0	0	0	0	0	1997	1785	488	1.35	-0.35	1.21	0.99
hSQ009458	NM_173551	ANKS6	203286	1.19	0.71	24.89	1.17	2.16	-0.18	92.38	100	0.33	0.22	-1.79	14.69	32.47	0.83	0.76	-0.27	108.64	100	3.9	3.78	4	5	2	1	1	2	2	1	0	0	NA	NA	NA	NA	NA	4509	2616	NA	0.99	-0.11	0.93	0.97
hSQ010960	NA	EST_AA620591	repname(hSQ010960)	1.19	0.71	24.95	3.27	4.46	-2.8	1.97	2.23	-0.64	-2.02	0.47	29.81	60.92	0.79	0.8	0.29	108.17	100	3.21	3.4	NA	NA	NA	NA	NA	NA	NA	NA	NA	NA	NA	NA	NA	NA	NA	NA	NA	NA	1.18	-1.38	1.02	1.06
hSQ037644	NM_007213	PRAF2	11230	1.19	0.71	24.97	1.13	2.04	0.3	84.11	100	0.95	1.12	0.13	29.81	60.67	0.9	0.91	0.53	108.17	100	3.95	4.25	0	0	0	0	0	0	0	0	0	0	NA	NA	NA	NA	NA	708	537	NA	0.91	0.18	1	1.07
hSQ028783	NM_018184	ARL8B	55207	1.19	0.71	24.99	1.7	2.52	-0.52	92.38	100	1.33	1.03	-0.97	14.69	46.92	0.92	0.89	-0.2	108.64	100	5.02	4.87	1	1	0	0	0	1	0	0	0	0	0	0	0	0	0	2201	561	221	0.82	-0.31	0.97	0.97
hSQ002890	NA	mtRNA_ND2	repname(hSQ002890)	1.19	0.71	25	-1.53	-0.72	-0.12	92.38	100	1.97	1.87	-0.31	21.69	57.12	0.43	0.4	0.33	108.17	100	3.06	3.3	NA	NA	NA	NA	NA	NA	NA	NA	NA	NA	NA	NA	NA	NA	NA	NA	NA	NA	0.81	-0.11	0.93	1.08
hSQ014788	NM_015651	PHF19	26147	1.19	0.71	25.01	3.48	4.88	-1.66	9.09	44.01	-2.37	-3.22	-0.31	21.69	57.1	0.77	0.76	-0.71	108.64	100	3.83	3.34	3	6	3	0	0	0	1	0	0	0	0	0	0	0	0	2291	1743	253	1.4	-0.86	0.99	0.87
hSQ000037	NM_000190	HMBS	3145	1.19	0.71	25.08	-1.08	-0.3	0.26	90.93	100	1.24	1.35	-1.74	14.69	33.21	0.95	0.91	1.18	85.33	100	5.54	6.05	1	1	0	0	0	0	0	0	0	0	0	0	0	0	0	266	1086	157	0.78	0.11	0.96	1.09
hSQ020799	NM_014992	DAAM1	23002	1.19	0.71	25.13	-0.87	0.07	-0.41	92.38	100	-1.11	-1.34	-1.71	14.69	33.78	0.93	0.88	-0.89	108.64	100	7.92	7.25	1	0	0	0	0	1	2	0	1	0	0	0	0	0	0	894	3237	125	0.94	-0.23	0.94	0.92
hSQ038359	NM_004053	BYSL	705	1.19	0.71	25.13	1.1	1.92	0.09	90.93	100	2.55	2.6	-1.51	14.69	37.11	0.93	0.9	0.72	108.17	100	8.32	8.99	0	0	0	0	0	1	1	0	1	0	0	0	0	0	0	338	1314	336	0.82	0.05	0.97	1.08
hSQ035276	NM_032959	POLR2J2	246721	1.18	0.71	25.19	-1.23	-0.52	0.06	90.93	100	1.73	1.76	-0.05	21.69	59.6	0.86	0.86	-0.22	108.64	100	3.92	3.78	0	0	0	0	0	0	1	0	0	0	0	0	0	0	0	1232	348	134	0.7	0.03	0.99	0.97
hSQ000236	NM_004130	GYG1	2992	1.18	0.71	25.25	-1.11	-0.24	-0.52	92.38	100	1.39	1.15	-0.35	21.69	56.59	0.92	0.9	-0.24	108.64	100	7.76	7.59	0	0	0	0	0	0	0	0	0	0	0	0	0	0	0	698	1053	53	0.88	-0.24	0.98	0.98
hSQ008586	NM_213662	STAT3	6774	1.18	0.71	25.29	-0.34	0.66	-0.99	43.3	94.57	-0.98	-1.63	-1.62	14.69	35.28	0.91	0.87	-0.91	108.64	100	8.05	7.18	1	3	1	1	1	1	2	1	0	0	0	0	0	0	0	2514	2169	132	1	-0.65	0.95	0.89
hSQ021618	NM_016060	MED31	51003	1.18	0.71	25.35	1.13	2.07	0.03	90.93	100	2.04	2.06	-0.92	14.69	47.8	0.97	0.93	0.48	108.17	100	4.83	5.29	0	0	0	0	0	0	0	0	0	0	0	0	0	0	0	1154	396	106	0.94	0.02	0.97	1.1
hSQ006222	NM_001077203	SENP7	57337	1.18	0.71	25.38	-0.48	0.47	-0.06	92.38	100	-0.39	-0.42	0.36	29.81	61.07	0.82	0.84	1.04	108.17	100	4.07	4.55	0	0	0	0	0	1	1	0	0	0	0	0	0	0	0	1667	2958	111	0.94	-0.03	1.02	1.12
hSQ034727	NM_007235	XPOT	11260	1.18	0.71	25.47	-1.16	-0.06	-0.53	92.38	100	-0.09	-0.47	0.78	29.71	59.34	0.86	0.9	-0.03	108.64	100	5.67	5.64	0	1	0	0	0	1	1	1	0	0	0	0	0	0	0	550	2889	426	1.1	-0.38	1.04	0.99
hSQ024642	NM_004238	TRIP12	9320	1.18	0.71	25.48	-0.52	0.27	-0.08	92.38	100	0.22	0.17	-1.27	14.69	41.44	0.97	0.93	-0.52	108.64	100	8.72	8.36	0	0	0	0	0	4	4	2	1	1	0	0	0	0	0	340	5979	109	0.8	-0.05	0.96	0.96
hSQ029360	NM_024884	L2HGDH	79944	1.18	0.71	25.49	-1.7	-0.71	-0.81	65.69	100	1.07	0.69	-1.77	14.69	32.8	0.96	0.91	-0.27	108.64	100	5.61	5.5	2	3	1	1	1	1	1	0	0	0	0	0	0	0	0	4624	1392	79	0.99	-0.37	0.95	0.98
hSQ037034	NM_005510	DOM3Z	1797	1.18	0.71	25.49	-0.04	0.9	0.25	90.93	100	1.88	1.99	-0.44	21.69	55.48	0.84	0.82	-0.04	108.64	100	5.44	5.4	0	0	0	0	0	0	0	0	0	0	0	1	0	0	0	66	1191	333	0.94	0.1	0.98	0.99
hSQ019091	NA	ncRNA_U26_0	repname(hSQ019091)	1.18	0.71	25.49	-1.94	-1.08	-0.02	92.38	100	1.44	1.42	-0.3	21.69	57.18	0.23	0.2	0.4	108.17	100	2.33	2.56	NA	NA	NA	NA	NA	NA	NA	NA	NA	NA	NA	NA	NA	NA	NA	NA	NA	NA	0.86	-0.01	0.86	1.1
hSQ021372	NM_014263	YME1L1	10730	1.18	0.71	25.51	-1.68	-0.86	-0.08	92.38	100	0.99	0.94	-0.81	19.17	49.67	0.9	0.84	0.77	108.17	100	5.93	6.46	1	1	1	0	0	2	0	0	1	0	0	0	0	0	0	1521	2151	182	0.81	-0.05	0.94	1.09
hSQ033678	NM_001219	CALU	813	1.18	0.71	25.56	-1.27	-0.43	-1.33	21.42	68.75	-0.49	-1.27	-2.94	14.69	19.29	0.93	0.86	-1.25	66.03	97.17	7.57	7.01	3	1	1	0	0	2	1	0	0	0	0	0	0	0	0	2306	948	62	0.84	-0.78	0.93	0.93
hSQ033096	NM_002716	PPP2R1B	5519	1.18	0.71	25.62	-0.74	0.18	-0.6	91.91	100	1.31	1.07	-1.03	14.69	45.85	0.89	0.85	-0.37	108.64	100	7.61	7.37	1	3	0	0	0	1	0	0	1	0	0	0	0	0	0	3715	1806	84	0.92	-0.24	0.95	0.97
hSQ043400	NM_000075	CDK4	1019	1.17	0.71	25.76	-0.86	-0.02	-2.75	2.12	2.71	2	0.71	-3.63	9.63	16.14	0.97	0.89	0.13	108.17	100	5.25	5.33	2	0	0	1	0	1	1	0	0	0	0	0	0	0	0	303	912	226	0.84	-1.3	0.92	1.01
hSQ000705	NM_001039366	ATP6V1E1	529	1.17	0.71	25.78	-1.66	-0.82	0.3	84.11	100	2.93	3.07	-2.36	14.69	24.61	0.98	0.93	0.18	108.17	100	7.32	7.5	1	0	0	0	0	0	0	0	0	0	0	0	0	0	0	537	615	187	0.83	0.14	0.95	1.02
hSQ026885	NM_012118	CCRN4L	25819	1.17	0.71	25.79	1.62	2.48	-0.08	92.38	100	1.76	1.73	0.23	29.81	60.96	0.84	0.85	0.1	108.17	100	6.59	6.68	0	0	0	0	0	1	2	1	1	1	0	0	0	0	0	463	1296	193	0.86	-0.03	1.01	1.01
hSQ042602	NM_005792	MPHOSPH6	10200	1.17	0.71	25.94	-0.53	0.45	0.37	84.11	97.44	2.65	2.81	-1.18	14.69	43.13	0.97	0.93	0.07	108.17	100	5.34	5.41	1	0	0	1	0	0	0	0	0	0	NA	NA	NA	NA	NA	568	483	NA	0.97	0.15	0.97	1.01
hSQ028460	NA	SLC44A5	204962	1.17	0.71	26.03	0.9	2.48	-0.59	91.91	100	2.17	1.8	0.61	29.81	60.39	0.78	0.87	0.7	108.17	100	3.57	3.98	NA	NA	NA	NA	NA	NA	NA	NA	NA	NA	NA	NA	NA	NA	NA	NA	NA	NA	1.58	-0.36	1.12	1.12
hSQ005695	NA	OR7E31P	375601	1.17	0.71	26.06	-1.46	-0.75	-0.19	92.38	100	1.34	1.26	0.5	29.81	60.86	0.71	0.77	0.42	108.17	100	3.56	3.82	NA	NA	NA	NA	NA	NA	NA	NA	NA	NA	NA	NA	NA	NA	NA	NA	NA	NA	0.72	-0.08	1.08	1.07
hSQ005640	NA	LOC149448	149448	1.17	0.71	26.06	-0.36	0.49	-0.89	58.83	100	-0.32	-0.87	0.49	29.81	60.87	0.84	0.86	-0.59	108.64	100	7.05	6.65	NA	NA	NA	NA	NA	NA	NA	NA	NA	NA	NA	NA	NA	NA	NA	NA	NA	NA	0.85	-0.55	1.03	0.94
hSQ001725	NM_018047	RBM22	55696	1.17	0.71	26.07	0.83	1.66	-0.06	92.38	100	2.03	2.01	-0.74	19.17	50.88	0.87	0.85	0.48	108.17	100	7.22	7.65	0	0	0	0	0	0	0	0	0	0	0	0	0	0	0	957	1263	77	0.83	-0.03	0.98	1.06
hSQ032718	NM_001801	CDO1	1036	1.17	0.71	26.08	-1.62	-0.76	-0.27	92.38	100	2.18	2.04	-1.74	14.69	33.32	0.92	0.89	-0.44	108.64	100	5.53	5.21	1	0	0	0	0	1	1	0	0	0	0	0	0	0	0	698	603	311	0.86	-0.14	0.96	0.94
hSQ017758	NM_002435	MPI	4351	1.17	0.71	26.26	1	1.73	-0.12	92.38	100	1.9	1.83	-0.23	21.69	58.03	0.88	0.87	0.19	108.17	100	5.72	5.88	0	0	0	0	0	0	2	0	0	0	NA	NA	NA	NA	NA	494	1272	NA	0.73	-0.07	1	1.03
hSQ021950	NM_030927	TSPAN14	81619	1.17	0.71	26.28	1.21	2.04	-0.37	92.38	100	-1.87	-2.05	0.94	28.01	57.8	0.84	0.88	-0.37	108.64	100	4.85	4.63	1	2	1	0	0	0	0	0	0	0	0	0	0	0	0	1652	813	78	0.83	-0.18	1.04	0.95
hSQ017121	NA	11::11	repname(hSQ017121)	1.17	0.71	26.28	1.24	2.1	0.16	90.93	100	3.16	3.26	0.46	29.81	60.96	0.85	0.86	0.54	108.17	100	4.03	4.34	NA	NA	NA	NA	NA	NA	NA	NA	NA	NA	NA	NA	NA	NA	NA	NA	NA	NA	0.86	0.1	1.01	1.08
hSQ004904	NM_018130	SHQ1	55164	1.17	0.71	26.3	-2.39	-1.25	-0.59	91.91	100	2.03	1.77	-2.3	14.69	25.31	0.97	0.92	-0.5	108.64	100	7.17	6.77	0	0	0	0	0	1	1	1	0	0	0	0	0	0	0	1005	1734	107	1.14	-0.26	0.95	0.94
hSQ037852	NA	11::11	repname(hSQ037852)	1.16	0.71	26.34	1.2	2.09	0.23	90.93	100	2.81	2.93	0.02	29.81	60.1	0.85	0.85	0.36	108.17	100	4.05	4.25	NA	NA	NA	NA	NA	NA	NA	NA	NA	NA	NA	NA	NA	NA	NA	NA	NA	NA	0.88	0.12	1	1.05
hSQ020936	NM_001098802	CEP78	84131	1.16	0.71	26.46	-1.84	-0.84	-0.42	92.38	100	1.19	1.01	-1.9	14.69	30.81	0.95	0.91	-0.09	108.64	100	5.98	5.91	0	0	0	0	0	0	2	0	0	0	0	0	0	0	0	305	2169	276	1	-0.18	0.96	0.99
hSQ036290	NM_018366	CNO	55330	1.16	0.71	26.5	0.5	1.3	-0.09	92.38	100	1.78	1.73	-0.56	21.69	53.69	0.79	0.74	-0.33	108.64	100	4.81	4.61	0	0	0	0	0	0	0	0	0	0	0	0	0	0	0	797	654	95	0.81	-0.05	0.94	0.96
hSQ033910	NM_006717	SPIN1	10927	1.16	0.71	26.63	0.89	1.8	-0.15	92.38	100	0.33	0.25	-0.52	21.69	54.29	0.89	0.86	-0.21	108.64	100	4.76	4.58	4	2	1	0	0	0	1	0	0	0	0	0	0	0	0	3428	789	315	0.91	-0.08	0.97	0.96
hSQ010403	NM_023936	MRPS34	65993	1.16	0.71	26.66	-1.11	-0.25	-0.27	92.38	100	2.51	2.38	-2.7	14.69	21.2	0.98	0.93	0.58	108.17	100	5.15	5.7	1	1	1	0	0	0	0	0	0	0	NA	NA	NA	NA	NA	325	657	NA	0.86	-0.13	0.94	1.11
hSQ018819	NM_001078174	SLC29A1	2030	1.16	0.71	26.72	-0.58	0.2	-0.5	92.38	100	0.96	0.68	-2.25	14.69	25.85	0.89	0.83	-0.48	108.64	100	7.01	6.6	2	1	1	0	0	3	1	1	0	0	0	0	0	0	0	623	1371	332	0.78	-0.28	0.94	0.94
hSQ042950	NM_012388	PLDN	26258	1.16	0.71	26.75	-1.79	-1.05	-1.64	9.09	45.7	0.14	-0.59	-0.2	21.69	58.35	0.86	0.84	0.2	108.17	100	3.39	3.5	6	1	1	1	1	0	0	0	0	0	0	0	0	0	0	3196	519	225	0.75	-0.74	0.98	1.03
hSQ001488	NM_181845	ZNF283	284349	1.16	0.71	26.78	0.99	2.19	0.01	90.93	100	1.01	1.01	0.61	29.81	60.42	0.72	0.78	-0.36	108.64	100	4.57	4.37	0	0	0	0	0	0	1	0	0	0	0	0	0	0	0	257	2040	268	1.2	0	1.08	0.96
hSQ019223	NM_000167	GK	2710	1.16	0.71	26.84	-0.48	0.29	-0.14	92.38	100	0.21	0.14	-0.72	19.17	51.28	0.87	0.85	0.65	108.17	100	5.92	6.24	0	0	0	0	0	0	0	0	0	0	0	0	0	0	0	1865	1575	115	0.77	-0.07	0.98	1.05
hSQ027746	NM_022899	ACTR8	93973	1.16	0.71	26.85	-0.66	0.09	-1.05	35.24	90.39	0.62	0.04	-2.48	14.69	23.28	0.91	0.86	-1.19	71.06	99.84	6.86	6.02	1	1	1	0	0	0	0	0	0	0	0	0	0	0	0	1591	1875	59	0.75	-0.58	0.95	0.88
hSQ025748	NM_014048	MKL2	57496	1.15	0.71	26.91	2.6	3.9	-0.48	92.38	100	-1.76	-2.01	0.69	29.81	59.97	0.76	0.83	-0.4	108.64	100	5.98	5.79	3	1	1	0	0	2	0	0	0	0	0	0	0	0	0	5328	3150	155	1.3	-0.24	1.1	0.97
hSQ002879	NM_024639	ZNF322A	79692	1.15	0.71	26.92	-0.42	0.48	-0.39	92.38	100	1.24	1.02	-1	14.69	46.41	0.88	0.87	-0.35	108.64	100	5.13	4.91	2	0	0	0	0	2	2	1	0	0	0	0	0	0	0	2962	1209	629	0.9	-0.22	0.99	0.96
hSQ038401	NM_002931	RING1	6015	1.15	0.71	26.96	0.55	1.35	0.07	90.93	100	0.96	1	-1.79	14.69	32.47	0.93	0.89	0.21	108.17	100	5.25	5.42	1	0	0	0	0	0	1	0	0	0	0	0	0	0	0	322	1221	194	0.8	0.04	0.96	1.03
hSQ028762	NM_000161	GCH1	2643	1.15	0.71	27.03	-1.7	-0.78	-1.23	25.69	77.21	1.4	0.79	-2.32	14.69	25.04	0.95	0.85	-0.23	108.64	100	4.64	4.53	3	1	1	1	0	0	0	0	0	0	0	0	0	0	0	2009	753	161	0.92	-0.61	0.9	0.98
hSQ033527	NM_003977	AIP	9049	1.15	0.71	27.07	-1.01	-0.26	-0.24	92.38	100	1.31	1.2	-2.44	14.69	23.74	0.93	0.88	0.72	108.17	100	6.18	6.86	1	0	0	1	0	0	0	0	0	0	0	0	0	0	0	110	993	109	0.76	-0.11	0.94	1.11
hSQ032997	NM_020188	C16orf61	56942	1.15	0.71	27.09	-1.57	-0.38	0.62	84.11	87.07	0.94	1.23	0.71	29.81	59.85	0.82	0.86	-0.33	108.64	100	3.51	3.32	1	0	0	0	0	0	0	0	0	0	0	0	0	0	0	289	240	193	1.18	0.29	1.05	0.95
hSQ020272	NM_173567	ABHD7	253152	1.15	0.71	27.11	1.73	2.75	-1.11	35.24	86.3	2.33	1.72	0.79	29.5	59.23	0.9	0.92	0.85	108.17	100	3.49	3.95	1	0	0	1	0	0	1	0	0	0	0	0	0	0	0	250	1089	79	1.02	-0.61	1.02	1.13
hSQ023692	NM_007169	PEMT	10400	1.15	0.71	27.21	1.82	2.94	-0.09	92.38	100	1.28	1.23	-0.22	21.69	58.11	0.92	0.91	0.58	108.17	100	3.86	4.31	2	2	1	0	0	0	0	0	0	0	0	0	0	0	0	226	600	180	1.12	-0.06	0.99	1.12
hSQ024428	NM_018115	SDAD1	55153	1.15	0.71	27.23	-1.25	-0.14	-0.35	92.38	100	0.13	-0.09	2.15	21.69	38.31	0.75	0.84	-0.82	108.64	100	6.87	6.26	2	1	0	1	0	0	0	0	0	0	0	0	0	0	0	835	2064	119	1.11	-0.22	1.13	0.91
hSQ027258	NM_001011513	PDLIM5	10611	1.15	0.71	27.23	-0.82	0.14	-0.18	92.38	100	-0.15	-0.25	-0.67	21.69	52.11	0.89	0.87	-0.32	108.64	100	8.05	7.78	5	1	0	3	0	1	0	0	0	0	0	0	0	0	0	4158	1464	151	0.96	-0.1	0.97	0.97
hSQ016083	NM_030891	LRRC3	81543	1.15	0.71	27.26	0.72	1.75	0.24	90.93	100	0.84	0.97	1.23	26.28	54.2	0.83	0.86	-0.35	108.64	100	4.82	4.53	1	2	1	0	0	0	0	0	0	0	0	0	0	0	0	1429	774	293	1.03	0.13	1.04	0.94
hSQ014889	NM_001040197	AGTRAP	57085	1.15	0.71	27.27	-0.94	-0.11	-0.49	92.38	100	1.45	1.2	-1.43	14.69	38.56	0.92	0.89	0.83	108.17	100	4.31	4.86	0	3	0	0	0	0	0	0	0	0	0	0	0	0	0	711	444	124	0.83	-0.25	0.97	1.13
hSQ029140	NM_017931	LL22NC03-5H6.5	55020	1.15	0.71	27.36	1.11	2.06	0.49	84.11	92.86	0.51	0.78	0.56	29.81	60.63	0.85	0.87	-0.12	108.64	100	5.9	5.8	2	0	0	0	0	1	0	0	0	0	0	0	0	0	0	1122	1410	76	0.95	0.27	1.02	0.98
hSQ014839	NM_000140	FECH	2235	1.14	0.71	27.54	0.3	1.22	-0.76	74.83	100	-0.13	-0.48	-1.99	14.69	29.45	0.93	0.89	-0.62	108.64	100	5.73	5.35	3	1	1	0	0	0	0	0	0	0	0	0	0	0	0	2407	1272	138	0.92	-0.35	0.96	0.93
hSQ021001	NM_019014	POLR1B	84172	1.14	0.71	27.58	2.11	2.99	-1.11	30.1	85.86	1.21	0.76	-0.59	21.69	53.32	0.9	0.88	-0.67	108.64	100	6.76	6.3	0	2	0	0	0	2	2	1	1	1	0	0	0	0	0	2102	3408	459	0.88	-0.45	0.98	0.93
hSQ019163	NM_014252	SLC25A15	10166	1.14	0.71	27.6	-1.47	-0.77	-0.16	92.38	100	0.75	0.67	1.15	26.68	55.32	0.61	0.75	0.1	108.17	100	3.56	3.62	0	0	0	0	0	1	0	0	0	0	1	1	0	0	0	443	906	272	0.7	-0.08	1.23	1.02
hSQ023643	NM_032380	GFM2	84340	1.14	1.61	27.64	-0.9	0.29	-0.15	92.38	100	-0.1	-0.19	1.37	25.16	52.21	0.81	0.87	-0.13	108.64	100	6.17	6.07	0	0	0	0	0	2	2	0	2	0	1	0	0	0	0	448	2340	304	1.19	-0.09	1.08	0.98
hSQ028581	NM_005107	ENDOGL1	9941	1.14	1.61	27.69	-1.54	-0.68	0.04	90.93	100	0.98	1	-0.81	19.17	49.73	0.82	0.79	0.25	108.17	100	4.58	4.71	0	0	0	0	0	1	3	1	0	0	NA	NA	NA	NA	NA	326	1107	NA	0.86	0.02	0.97	1.03
hSQ036320	NM_145303	LOC202459	202459	1.14	1.61	27.72	-1.05	0.37	-0.51	92.38	100	0.5	0.11	1.97	21.91	41.67	0.73	0.83	0.07	108.17	100	3.24	3.3	3	2	2	0	0	0	0	0	0	0	0	0	0	0	0	595	360	231	1.42	-0.39	1.14	1.02
hSQ037883	NM_000991	RPL28	6158	1.14	1.61	27.77	-0.12	0.7	-0.32	92.38	100	1.36	1.16	1.1	27.27	55.99	0.64	0.7	-0.28	108.64	100	4.12	3.98	3	3	1	1	0	0	0	0	0	0	NA	NA	NA	NA	NA	3749	414	NA	0.83	-0.2	1.1	0.97
hSQ011793	NM_183376	ARRDC4	91947	1.14	1.61	27.78	0.73	1.5	-1.88	5.14	29.82	-0.65	-1.3	1.06	27.27	56.52	0.81	0.84	-0.43	108.64	100	4.7	4.35	3	1	0	1	0	0	0	0	0	0	0	0	0	0	0	2643	1257	144	0.77	-0.65	1.05	0.93
hSQ031049	NM_006805	HNRNPA0	10949	1.14	1.61	27.79	-0.54	0.17	0.01	90.93	100	1.75	1.75	-1.79	14.69	32.41	0.96	0.91	-0.82	108.64	100	11.25	9.52	1	0	0	0	0	0	0	0	0	0	0	0	0	0	0	1763	918	284	0.72	0	0.94	0.85
hSQ008796	NM_002140	HNRNPK	3190	1.14	1.61	27.79	-0.38	0.88	-0.6	91.91	100	1.86	1.57	-0.82	19.17	49.62	0.98	0.95	0.03	108.17	100	13.36	13.42	0	0	0	0	0	0	0	0	0	0	0	0	0	0	0	1230	1395	209	1.27	-0.29	0.98	1
hSQ044485	NM_017975	ZWILCH	55055	1.14	1.61	27.85	-1.73	-0.8	-0.45	92.38	100	0.59	0.31	-0.15	21.69	58.77	0.91	0.9	-0.25	108.64	100	5.64	5.4	0	0	0	0	0	3	1	1	0	0	0	0	0	0	0	1154	1776	246	0.93	-0.29	0.99	0.96
hSQ017265	NM_020773	TBC1D14	57533	1.14	1.61	28.06	1.72	2.65	-0.45	92.38	100	0.1	-0.08	1.11	26.68	55.91	0.82	0.88	0.07	108.17	100	3.63	3.68	3	1	1	0	0	2	0	0	0	0	0	0	0	0	0	2719	2037	169	0.93	-0.19	1.08	1.01
hSQ005726	NM_152475	ZNF417	147687	1.14	1.61	28.08	-2.24	-1.31	0.1	90.93	100	-0.37	-0.32	0.86	28.63	58.63	0.57	0.67	-0.16	108.64	100	4.42	4.33	0	1	0	0	0	0	0	0	0	0	0	0	0	0	0	2775	1728	199	0.92	0.04	1.16	0.98
hSQ010735	NA	LOC149448	149448	1.13	1.61	28.15	0.12	0.94	-1.26	21.42	74.35	-0.14	-0.9	-0.07	21.69	59.46	0.86	0.86	-0.71	108.64	100	7.31	6.8	NA	NA	NA	NA	NA	NA	NA	NA	NA	NA	NA	NA	NA	NA	NA	NA	NA	NA	0.82	-0.75	1	0.93
hSQ024893	NM_014661	FAM53B	9679	1.13	1.61	28.15	0.19	1.21	-1.03	43.3	91.88	0.26	-0.29	-1.54	14.69	36.69	0.93	0.86	-0.28	108.64	100	5.14	4.95	4	1	1	1	0	0	0	0	0	0	0	0	0	0	0	3948	1269	523	1.01	-0.55	0.93	0.96
hSQ023353	NM_001009880	C22orf9	23313	1.13	1.61	28.19	-0.13	0.9	-0.99	43.3	94.34	-1.19	-1.67	-1.73	14.69	33.38	0.98	0.92	-0.03	108.64	100	4.06	4.05	2	3	0	0	0	1	0	0	0	0	0	0	0	0	0	4934	1215	66	1.03	-0.48	0.94	1
hSQ018084	NM_003132	SRM	6723	1.13	1.61	28.21	-0.43	0.25	-0.21	92.38	100	2.39	2.28	-0.01	21.69	59.89	0.88	0.88	0.91	108.17	100	5.03	5.43	1	1	0	0	0	1	0	0	0	0	0	0	0	0	0	273	909	91	0.68	-0.11	1	1.08
hSQ012670	NM_006106	YAP1	10413	1.13	1.61	28.24	-0.79	0.12	-0.09	92.38	100	-2.3	-2.36	-1.74	14.69	33.2	0.93	0.88	-0.69	108.64	100	6.31	5.87	4	4	1	1	0	0	0	0	0	0	0	1	0	0	0	3475	1365	249	0.91	-0.06	0.94	0.93
hSQ010245	NM_022836	DCLRE1B	64858	1.13	1.61	28.34	-0.32	0.44	-0.65	90.93	100	0.29	0	-2.17	14.69	26.95	0.94	0.9	-1.1	81.59	100	5.49	4.82	0	1	0	0	0	2	3	2	0	0	0	0	0	0	0	1879	1599	171	0.76	-0.29	0.96	0.88
hSQ023536	NM_000178	GSS	2937	1.13	1.61	28.4	-1.23	-0.46	-0.28	92.38	100	1.07	0.94	-1.95	14.69	29.98	0.91	0.86	0.53	108.17	100	6.83	7.43	1	1	0	1	0	1	0	0	0	0	0	0	0	0	0	394	1425	80	0.77	-0.13	0.94	1.09
hSQ010646	NA	LOC151162	151162	1.13	1.61	28.41	0.92	1.9	0.21	90.93	100	-0.52	-0.35	-1.85	14.69	31.48	0.96	0.9	-0.87	108.64	100	6.43	5.79	NA	NA	NA	NA	NA	NA	NA	NA	NA	NA	NA	NA	NA	NA	NA	NA	NA	NA	0.98	0.17	0.93	0.9
hSQ036096	NM_181845	ZNF283	284349	1.13	1.61	28.43	0.58	1.73	0.32	84.11	99.51	-0.03	0.15	1.44	25.16	51.1	0.64	0.75	-0.41	108.64	100	4.34	4.08	0	0	0	0	0	0	1	0	0	0	0	0	0	0	0	257	2040	268	1.15	0.18	1.18	0.94
hSQ010616	NM_152305	KTELC1	56983	1.13	1.61	28.48	2.27	3.07	-1.2	25.69	79.52	0.43	-0.18	-0.36	21.69	56.49	0.82	0.81	-0.54	108.64	100	4.74	4.46	2	4	1	0	0	0	0	0	0	0	0	0	0	0	0	2267	1179	70	0.8	-0.61	0.99	0.94
hSQ016951	NM_005685	GTF2IRD1	9569	1.13	1.61	28.49	0.39	1.38	0.26	90.93	100	-0.86	-0.72	2.01	21.91	40.81	0.79	0.85	0	108.17	100	5.68	5.68	1	0	0	0	0	1	0	0	1	0	0	0	0	0	0	150	2835	76	0.99	0.14	1.09	1
hSQ030242	NM_005866	OPRS1	10280	1.13	1.61	28.5	-1.28	-0.45	-0.26	92.38	100	2.49	2.39	-1.31	14.69	40.66	0.94	0.9	0.59	108.17	100	4.48	4.81	2	0	0	1	0	1	1	1	0	0	0	0	0	0	0	909	672	74	0.83	-0.11	0.95	1.07
hSQ021274	NM_001010891	MTX3	345778	1.13	1.61	28.56	-0.45	0.35	0.71	74.83	83.32	0.34	0.73	-0.77	19.17	50.38	0.88	0.82	0.48	108.17	100	4.01	4.25	5	1	1	2	0	0	1	0	0	0	NA	NA	NA	NA	NA	6968	939	NA	0.8	0.39	0.93	1.06
hSQ044353	NA	KIAA1245::NBPF14	149013	1.13	1.61	28.59	-1.46	-0.66	0.93	65.69	73.94	-0.74	-0.31	-0.66	21.69	52.15	0.88	0.83	1.7	85.33	100	4.14	6.67	NA	NA	NA	NA	NA	NA	NA	NA	NA	NA	NA	NA	NA	NA	NA	NA	NA	NA	0.79	0.43	0.95	1.61
hSQ015543	NM_014734	KIAA0247	9766	1.13	1.61	28.61	1.75	3.14	-0.06	92.38	100	-1.16	-1.2	-1.76	14.69	33.03	0.9	0.77	-1.93	34.95	60.5	5.74	4.45	4	4	2	2	1	0	0	0	0	0	0	0	0	0	0	4163	912	313	1.4	-0.04	0.86	0.78
hSQ002543	NM_000666	ACY1	95	1.13	1.61	28.64	-0.74	-0.04	-0.79	65.69	100	0.36	-0.08	-0.21	21.69	58.21	0.84	0.84	0.17	108.17	100	5.41	5.57	0	0	0	0	0	1	3	0	0	0	0	0	0	0	0	126	1227	61	0.7	-0.45	1	1.03
hSQ012764	NM_004735	LRRFIP1	9208	1.13	1.61	28.65	0.82	1.68	0.12	90.93	100	-0.47	-0.42	3.24	8.9	19.73	0.16	0.24	0.03	108.17	100	3.6	3.62	2	0	0	1	0	0	0	0	0	0	0	0	0	0	0	1122	2355	170	0.86	0.05	1.55	1.01
hSQ004591	NM_001080533	UNC119B	84747	1.12	1.61	28.71	-0.14	0.67	-0.23	92.38	100	0.46	0.36	-1	14.69	46.36	0.92	0.88	-0.83	108.64	100	4.73	4.35	5	3	2	3	1	0	0	0	0	0	0	0	0	0	0	3608	756	447	0.82	-0.1	0.96	0.92
hSQ025272	NM_018211	RAVER2	55225	1.12	1.61	28.72	-1.7	-0.84	-0.13	92.38	100	0.55	0.46	0.98	28.01	57.45	0.78	0.81	-0.51	108.64	100	4.79	4.54	1	0	0	1	0	1	1	1	0	0	0	0	0	0	0	2244	2037	78	0.86	-0.09	1.04	0.95
hSQ036011	NM_021227	DC2	58505	1.12	1.61	28.76	-1.27	-0.23	-0.39	92.38	100	1	0.78	0.27	29.81	61.03	0.81	0.82	0.11	108.17	100	3.4	3.48	2	1	1	0	0	0	0	0	0	0	0	0	0	0	0	559	450	71	1.03	-0.22	1.01	1.02
hSQ003455	NA	LOC158563::CLCN5	158563::1184	1.12	1.61	28.77	1.84	2.76	-0.24	92.38	100	-0.79	-0.94	-0.19	21.69	58.44	0.9	0.89	0.21	108.17	100	6.35	6.52	NA	NA	NA	NA	NA	NA	NA	NA	NA	NA	NA	NA	NA	NA	NA	NA	NA	NA	0.92	-0.15	0.99	1.03
hSQ016669	NM_013373	ZDHHC8	29801	1.12	1.61	28.78	-0.57	0.47	-0.28	92.38	100	1.36	1.21	-0.6	21.69	53.12	0.84	0.81	-0.49	108.64	100	4.72	4.44	1	0	0	0	0	1	0	0	0	0	0	0	0	0	0	1035	2298	106	1.04	-0.15	0.97	0.94
hSQ028519	NM_153451	ORAOV1	220064	1.12	1.61	28.87	0.77	1.91	-0.23	92.38	100	1.34	1.26	-1.48	14.69	37.67	0.77	0.71	-0.16	108.64	100	4.29	4.2	3	4	2	0	0	0	0	0	0	0	0	1	0	0	0	1953	414	158	1.14	-0.08	0.93	0.98
hSQ011870	NM_016332	SEPX1	51734	1.12	1.61	28.88	-1.96	-1.27	-0.21	92.38	100	2.11	2.02	-3.51	9.63	16.5	0.95	0.89	0.89	108.17	100	3.56	4.05	2	2	1	1	1	0	0	0	0	0	0	0	0	0	0	879	351	137	0.7	-0.1	0.94	1.14
hSQ026460	NM_213599	TMEM16E	203859	1.12	1.61	28.95	-1.27	-0.4	-0.16	92.38	100	2.38	2.3	-0.42	21.69	55.74	0.9	0.88	-0.12	108.64	100	6.94	6.86	1	0	0	1	0	1	0	0	0	0	0	0	0	0	0	88	2742	317	0.87	-0.08	0.98	0.99
hSQ007017	NM_014300	SEC11A	23478	1.12	1.61	28.95	2.4	3.57	-1.7	7.95	41.6	1.56	0.6	-2.99	9.63	18.96	0.83	0.71	-0.53	108.64	100	6.14	5.61	1	1	0	0	0	0	0	0	0	0	0	0	0	0	0	473	540	368	1.17	-0.96	0.86	0.91
hSQ021242	NM_017824	2009-03-05	54708	1.12	1.61	29.04	-0.19	0.78	0.12	90.93	100	1.15	1.21	0.21	29.81	60.92	0.87	0.87	-0.21	108.64	100	5.59	5.4	1	1	0	0	0	0	0	0	0	0	0	0	0	0	0	2757	837	332	0.97	0.06	1.01	0.97
hSQ011464	NM_020188	C16orf61	56942	1.12	1.61	29.06	-0.25	0.58	-0.12	92.38	100	1.46	1.39	-1.17	14.69	43.35	0.96	0.9	-0.02	108.64	100	4.67	4.66	1	0	0	0	0	0	0	0	0	0	0	0	0	0	0	289	240	193	0.83	-0.07	0.94	1
hSQ015255	NM_021632	ZNF350	59348	1.12	1.61	29.06	1.92	2.84	0.05	90.93	100	0.27	0.29	1.73	22.99	46.13	0.42	0.63	-0.95	108.64	100	5.33	4.65	0	0	0	0	0	2	2	2	0	0	0	0	0	0	0	512	1599	228	0.92	0.02	1.5	0.87
hSQ044154	NM_013368	SERTAD3	29946	1.12	1.61	29.07	0.61	1.75	-0.22	92.38	100	0.12	0.03	0.2	29.81	60.89	0.76	0.76	-0.39	108.64	100	5.69	5.43	1	0	0	1	0	0	0	0	0	0	0	0	0	0	0	646	591	278	1.14	-0.09	1.01	0.95
hSQ034449	NA	LOC441481	441481	1.12	1.61	29.08	-0.41	0.38	0.03	90.93	100	1.46	1.48	-0.03	21.69	59.77	0.88	0.88	0.6	108.17	100	3.23	3.51	NA	NA	NA	NA	NA	NA	NA	NA	NA	NA	NA	NA	NA	NA	NA	NA	NA	NA	0.79	0.01	1	1.09
hSQ015140	NM_017859	UCKL1	54963	1.12	1.61	29.09	0.12	1.18	0.26	90.93	100	-0.44	-0.28	1.18	26.68	54.88	0.8	0.87	0.2	108.17	100	5.12	5.25	0	0	0	0	0	1	2	0	0	0	NA	NA	NA	NA	NA	141	1646	NA	1.06	0.16	1.08	1.03
hSQ023614	NM_001006945	C1orf103	55791	1.11	1.61	29.45	-2.02	-1.4	0.49	84.11	92.52	-0.1	0.11	0.68	29.81	60.03	0.83	0.88	0.63	108.17	100	5.04	5.45	0	0	0	0	0	1	1	1	1	1	0	0	0	0	0	769	702	336	0.62	0.21	1.05	1.08
hSQ006865	NA	RPP21	79897	1.11	1.61	29.52	-0.4	0.35	-0.18	92.38	100	1.9	1.82	-1.28	14.69	41.21	0.94	0.89	0.27	108.17	100	5.1	5.21	NA	NA	NA	NA	NA	NA	NA	NA	NA	NA	NA	NA	NA	NA	NA	NA	NA	NA	0.74	-0.08	0.95	1.02
hSQ002939	NM_005510	DOM3Z	1797	1.11	1.61	29.55	0.41	1.48	-0.06	92.38	100	1.94	1.91	-0.16	21.69	58.73	0.84	0.83	-0.26	108.64	100	5.4	5.15	0	0	0	0	0	0	0	0	0	0	0	1	0	0	0	66	1191	333	1.07	-0.03	0.99	0.95
hSQ035089	NM_022133	SNX16	64089	1.11	1.61	29.62	4.71	5.8	-1.57	11.29	50.83	-0.71	-1.51	1.11	26.68	55.87	0.27	0.41	-1.55	44.12	81.47	3.75	2.99	2	2	2	0	0	1	0	0	0	0	0	0	0	0	0	1914	1035	342	1.09	-0.81	1.54	0.8
hSQ017543	NM_031903	MRPL32	64983	1.11	1.61	29.72	-3.26	-1.93	0.5	84.11	92.14	-0.53	-0.26	1.94	21.91	42.19	0.34	0.54	0.18	108.17	100	2.43	2.56	0	0	0	0	0	0	1	0	0	0	NA	NA	NA	NA	NA	276	567	NA	1.34	0.27	1.59	1.06
hSQ020050	NM_016138	COQ7	10229	1.11	1.61	29.81	0.17	1.03	-0.23	92.38	100	1.54	1.44	0.62	29.81	60.36	0.86	0.87	0.26	108.17	100	4.52	4.68	1	1	1	1	1	0	0	0	0	0	0	0	0	0	0	1870	654	60	0.86	-0.1	1.01	1.03
hSQ013254	NM_024592	SRD5A3	79644	1.1	1.61	29.98	-2.15	-1.24	-0.82	65.69	100	1.45	1	0.41	29.81	61.04	0.87	0.88	0.16	108.17	100	4.09	4.22	0	0	0	0	0	2	2	1	1	1	0	0	0	0	0	1220	957	95	0.91	-0.45	1.01	1.03
hSQ030347	NM_000127	EXT1	2131	1.1	1.61	30.04	2.89	3.91	-0.64	91.61	100	1.28	0.91	-0.29	21.69	57.34	0.9	0.9	-0.34	108.64	100	5.63	5.39	0	0	0	0	0	1	2	0	1	0	1	0	0	0	0	349	2241	773	1.02	-0.37	0.99	0.96
hSQ008801	NM_057175	NARG1	80155	1.1	1.61	30.14	-2.45	-1.58	0.41	84.11	96.01	1	1.22	0.03	29.81	60.14	0.92	0.92	0.48	108.17	100	9.77	10.26	2	1	1	1	1	1	0	0	0	0	0	0	0	0	0	2697	2601	256	0.87	0.22	1	1.05
hSQ041172	NM_006185	NUMA1	4926	1.1	1.61	30.22	-0.98	-0.09	-0.4	92.38	100	-1.01	-1.17	-1.4	14.69	39.18	0.92	0.89	-1.46	48.64	86.12	6.74	6.06	1	1	1	0	0	4	2	2	1	1	0	0	0	0	0	662	6348	172	0.89	-0.16	0.97	0.9
hSQ022123	NM_015470	RAB11FIP5	26056	1.1	1.61	30.46	3.1	4.34	-0.96	43.3	96.13	-0.3	-0.79	-2.33	14.69	24.94	0.9	0.85	-0.24	108.64	100	5.38	5.24	3	1	1	0	0	0	0	0	0	0	0	0	0	0	0	2139	1962	241	1.24	-0.49	0.94	0.97
hSQ002846	NM_030751	ZEB1	6935	1.1	1.61	30.52	-2.98	-2.13	-0.49	92.38	100	-1.3	-1.51	-0.55	21.69	53.87	0.88	0.84	1.15	85.33	100	4.58	5.06	0	1	0	0	0	0	0	0	0	0	NA	NA	NA	NA	NA	542	3375	NA	0.85	-0.21	0.95	1.1
hSQ014024	NA	LOC402175	402175	1.09	1.61	30.55	-0.95	0.26	0.06	90.93	100	0.82	0.87	0.55	29.81	60.69	0.84	0.89	0.17	108.17	100	3.83	3.97	NA	NA	NA	NA	NA	NA	NA	NA	NA	NA	NA	NA	NA	NA	NA	NA	NA	NA	1.21	0.05	1.05	1.04
hSQ011830	NM_001001484	PTER	9317	1.09	1.61	30.55	-1.27	-0.51	-0.62	91.61	100	0.33	-0.01	1.18	26.68	54.89	0.76	0.8	-1.24	66.03	97.59	6.65	5.92	2	1	0	1	0	0	0	0	0	0	0	0	0	0	0	2481	1050	262	0.76	-0.34	1.06	0.89
hSQ003297	NM_181803	UBE2C	11065	1.09	1.61	30.59	0.92	1.78	0.1	90.93	100	2.92	2.98	-1.92	14.69	30.4	0.98	0.94	0.06	108.17	100	6.82	6.89	0	0	0	0	0	0	0	0	0	0	0	0	0	0	0	283	153	80	0.86	0.05	0.96	1.01
hSQ006827	NM_005573	LMNB1	4001	1.09	1.61	30.62	-1.6	-0.78	-0.86	58.83	100	1.92	1.3	-0.75	19.17	50.75	0.97	0.93	-3.87	4.53	37.73	13.71	7.73	0	0	0	0	0	0	0	0	0	0	1	1	1	0	0	753	1761	368	0.82	-0.62	0.96	0.56
hSQ024040	NM_014278	HSPA4L	22824	1.09	1.61	30.63	-0.9	-0.11	0.21	90.93	100	2.79	2.91	-2.39	14.69	24.2	0.96	0.92	0.54	108.17	100	9.02	9.53	0	0	0	0	0	1	1	1	1	1	0	0	0	0	0	493	2520	253	0.79	0.11	0.95	1.06
hSQ029444	NM_007169	PEMT	10400	1.09	1.61	30.76	-1.29	-0.44	0	90.93	100	1.94	1.94	-0.18	21.69	58.46	0.92	0.91	0.71	108.17	100	4.09	4.63	2	2	1	0	0	0	0	0	0	0	0	0	0	0	0	226	600	180	0.85	0	0.99	1.13
hSQ009542	NM_032997	ZWINT	11130	1.09	1.61	30.8	-1.66	-0.96	-0.93	52.46	98.34	2.13	1.67	-3.97	9.63	15.39	0.85	0.75	-0.86	108.64	100	5.12	4.57	1	1	1	1	1	0	0	0	0	0	NA	NA	NA	NA	NA	980	834	NA	0.7	-0.46	0.89	0.89
hSQ030226	NM_001081003	COMMD5	28991	1.09	1.61	30.83	0.3	1.03	-0.41	92.38	100	1.48	1.25	-0.93	14.69	47.67	0.94	0.91	-0.05	108.64	100	4.73	4.71	2	0	0	1	0	0	0	0	0	0	0	0	0	0	0	498	675	233	0.73	-0.23	0.98	1
hSQ020317	NM_015328	AHCYL2	23382	1.09	1.61	30.84	0.73	1.79	-0.59	91.91	100	-0.91	-1.19	0.9	28.63	58.23	0.78	0.82	0.41	108.17	100	5.92	6.08	4	4	0	0	0	1	3	0	0	0	0	0	0	0	0	3147	1836	54	1.07	-0.28	1.05	1.03
hSQ027255	NM_001007559	SS18	6760	1.09	1.61	30.84	-1.17	-0.17	-0.29	92.38	100	2.04	1.88	-2.39	14.69	24.3	0.93	0.87	0.24	108.17	100	5.88	6.02	0	2	0	0	0	2	0	0	0	0	0	0	0	0	0	2099	1257	78	1	-0.16	0.94	1.02
hSQ023699	NM_014846	KIAA0196	9897	1.09	1.61	30.91	0.38	1.65	-0.12	92.38	100	-0.12	-0.18	0.57	29.81	60.59	0.89	0.91	-0.14	108.64	100	6.19	6.06	0	0	0	0	0	1	3	0	0	0	0	0	0	0	0	356	3480	329	1.27	-0.06	1.02	0.98
hSQ030456	NA	C6orf70	55780	1.09	1.61	30.96	0.65	1.65	0.48	84.11	92.93	0.24	0.44	0.74	29.81	59.62	0.74	0.78	0.63	108.17	100	4.58	4.87	NA	NA	NA	NA	NA	NA	NA	NA	NA	NA	NA	NA	NA	NA	NA	NA	NA	NA	1	0.2	1.06	1.06
hSQ025400	NM_018394	ABHD10	55347	1.09	1.61	31.08	-1.07	-0.29	-0.19	92.38	100	1.2	1.11	-0.16	21.69	58.7	0.91	0.9	-0.19	108.64	100	5.4	5.27	0	0	0	0	0	0	0	0	0	0	NA	NA	NA	NA	NA	1638	921	NA	0.78	-0.09	1	0.98
hSQ033707	NM_018375	SLC39A9	55334	1.09	1.61	31.11	-0.8	0.02	-0.36	92.38	100	-0.22	-0.38	-1.07	14.69	45.15	0.93	0.89	-0.82	108.64	100	5.14	4.61	0	1	0	0	0	0	1	0	0	0	0	0	0	0	0	1958	924	136	0.82	-0.16	0.95	0.9
hSQ013057	NM_033222	PSIP1	11168	1.09	1.61	31.11	-3.93	-2.42	0.02	90.93	100	-0.19	-0.18	-3.19	9.63	17.81	0.98	0.91	0.41	108.17	100	7.29	7.58	0	0	0	0	0	0	0	0	0	0	0	0	0	0	0	1452	1593	309	1.51	0.01	0.93	1.04
hSQ027674	NM_000254	MTR	4548	1.09	1.61	31.13	-0.03	1.48	-0.61	91.61	100	0.42	-0.12	1.42	25.16	51.36	0.74	0.88	0.22	108.17	100	6.88	7.2	2	2	1	1	1	0	0	0	0	0	0	0	0	0	0	3016	3798	286	1.51	-0.54	1.2	1.05
hSQ004068	NA	SMA3	10571	1.09	1.61	31.16	-1.98	-1.18	-0.04	92.38	100	-0.98	-1.01	-0.88	19.17	48.57	0.77	0.72	0.37	108.17	100	4.69	4.9	NA	NA	NA	NA	NA	NA	NA	NA	NA	NA	NA	NA	NA	NA	NA	NA	NA	NA	0.8	-0.02	0.94	1.04
hSQ001956	NM_021227	DC2	58505	1.08	1.61	31.19	-1.22	0.16	-0.5	92.38	100	0.33	-0.07	2.57	14.69	30.53	0.67	0.82	0.01	108.17	100	3.11	3.12	2	1	1	0	0	0	0	0	0	0	0	0	0	0	0	559	450	71	1.38	-0.4	1.23	1
hSQ045467	NM_175902	FLJ22222	79701	1.08	1.61	31.19	-0.92	-0.07	-1.04	35.24	90.98	0.65	0.26	-1.64	14.69	34.86	0.92	0.87	0.14	108.17	100	4.8	4.86	1	1	1	1	1	0	0	0	0	0	0	1	0	0	0	351	996	91	0.85	-0.39	0.94	1.01
hSQ018184	NM_001077523	AP3D1	8943	1.08	1.61	31.29	-0.27	0.39	-0.07	92.38	100	1.37	1.34	-2.63	14.69	21.77	0.95	0.89	-0.26	108.64	100	7.53	7.32	0	0	0	0	0	1	4	1	0	0	0	0	0	0	0	1178	3339	223	0.66	-0.03	0.94	0.97
hSQ013669	NM_033280	SEC11C	90701	1.08	1.61	31.34	-0.31	0.52	-0.44	92.38	100	0.79	0.58	-0.13	21.69	59.02	0.93	0.92	0.86	108.17	100	3.39	3.87	0	0	0	0	0	0	0	0	0	0	0	0	0	0	0	146	579	56	0.83	-0.21	0.99	1.14
hSQ004369	NM_001002877	THOC5	8563	1.08	1.61	31.35	0.35	1.26	0.16	90.93	100	1.95	2.03	-0.12	21.69	59.1	0.87	0.87	-0.1	108.64	100	6.46	6.38	0	0	0	0	0	0	1	0	0	0	0	0	0	0	0	289	2052	204	0.91	0.08	1	0.99
hSQ018196	NM_019056	NDUFB11	54539	1.08	1.61	31.42	-0.3	0.4	0.32	84.11	99.43	1.68	1.87	-4.54	9.63	14.72	0.96	0.89	0.97	108.17	100	5.1	5.72	0	0	0	0	0	0	0	0	0	0	0	0	0	0	0	97	492	359	0.7	0.19	0.92	1.12
hSQ032916	NM_016081	PALLD	23022	1.08	1.61	31.46	1.03	2.04	-1.47	13.85	57.73	-0.12	-0.79	-0.08	21.69	59.4	0.88	0.87	-0.76	108.64	100	6.9	6.39	6	1	1	2	0	0	2	0	0	0	0	1	0	0	0	2276	3321	211	1.01	-0.67	1	0.93
hSQ004195	NA	ncRNA_U29_0	repname(hSQ004195)	1.08	1.61	31.47	-1.74	-1.03	-0.08	92.38	100	1.12	1.07	-0.42	21.69	55.72	0.55	0.5	0.23	108.17	100	2.59	2.75	NA	NA	NA	NA	NA	NA	NA	NA	NA	NA	NA	NA	NA	NA	NA	NA	NA	NA	0.72	-0.05	0.9	1.06
hSQ022287	NM_033213	ZNF670	93474	1.08	1.61	31.5	1.02	1.91	-0.12	92.38	100	0.16	0.11	1.19	26.68	54.8	0.76	0.81	0.04	108.17	100	5.51	5.53	0	0	0	0	0	0	0	0	0	0	0	0	0	0	0	664	1170	171	0.89	-0.05	1.07	1
hSQ020556	NM_001100161	XPO7	23039	1.08	1.61	31.57	-0.15	0.49	0.27	90.93	100	-0.49	-0.35	-1.56	14.69	36.26	0.91	0.87	-0.09	108.64	100	6.12	6.05	2	0	0	0	0	1	0	0	1	0	0	0	0	0	0	1497	3291	102	0.64	0.14	0.96	0.99
hSQ042834	NM_006837	COPS5	10987	1.08	1.61	31.64	-0.52	0.19	0.08	90.93	100	1.34	1.38	-1.63	14.69	35.13	0.92	0.87	0.06	108.17	100	6.53	6.58	0	0	0	0	0	1	0	0	1	0	0	0	0	0	0	150	1005	331	0.71	0.04	0.95	1.01
hSQ010810	NM_018994	FBXO42	54455	1.08	1.61	31.65	1.21	2.08	-0.55	92.38	100	-0.21	-0.43	-0.93	14.69	47.71	0.93	0.89	-1.03	108.17	100	5.65	5.17	2	1	0	0	0	0	0	0	0	0	0	0	0	0	0	605	2154	216	0.87	-0.22	0.96	0.92
hSQ045058	NM_019015	CSGlcA-T	54480	1.08	1.61	31.69	0.1	0.92	0.12	90.93	100	0.74	0.8	-0.85	19.17	48.97	0.87	0.84	0.28	108.17	100	6.08	6.37	0	0	0	0	0	1	1	1	0	0	0	0	0	0	0	138	2319	1513	0.82	0.06	0.96	1.05
hSQ007554	NM_014275	MGAT4B	11282	1.08	1.61	31.71	-0.29	0.44	-0.13	92.38	100	-0.38	-0.44	0.75	29.81	59.54	0.82	0.84	0.27	108.17	100	3.25	3.38	0	2	0	0	0	0	0	0	0	0	0	0	0	0	0	940	1647	358	0.73	-0.06	1.03	1.04
hSQ042293	NM_018347	C20orf29	55317	1.08	1.61	31.74	-1.84	-1.05	0.2	90.93	100	1.35	1.44	-0.52	21.69	54.36	0.89	0.88	0.55	108.17	100	5.02	5.4	0	1	0	0	0	0	0	0	0	0	1	1	1	0	0	1010	603	219	0.79	0.09	0.98	1.08
hSQ019235	NM_001001894	TTC3	7267	1.08	1.61	31.75	-1.76	-0.81	0.34	84.11	98.76	-0.43	-0.28	-1.77	14.69	32.79	0.96	0.89	-0.17	108.64	100	4.18	4.11	3	0	0	1	0	2	1	0	0	0	0	0	0	0	0	1531	6078	105	0.95	0.15	0.93	0.98
hSQ029605	NM_017423	GALNT7	51809	1.08	1.61	31.77	0.86	1.54	0.2	90.93	100	0.16	0.31	-0.99	14.69	46.5	0.88	0.84	-0.54	108.64	100	7.37	6.9	1	2	1	0	0	0	1	0	0	0	NA	NA	NA	NA	NA	2249	1974	NA	0.69	0.15	0.96	0.94
hSQ032054	NM_020128	MDM1	56890	1.07	1.61	31.97	-1.31	-0.53	0.54	84.11	90.71	-0.12	0.16	5.11	4.62	4.98	0.6	0.81	0.2	108.17	100	3.06	3.19	1	0	0	0	0	0	0	0	0	0	0	0	0	0	0	1362	669	58	0.78	0.28	1.35	1.04
hSQ026596	NM_016395	PTPLAD1	51495	1.07	1.61	32.01	-1.23	-0.54	0.22	90.93	100	1.51	1.61	-0.76	19.17	50.58	0.97	0.95	0.39	108.17	100	7.91	8.29	0	0	0	0	0	1	0	0	0	0	0	0	0	0	0	1974	1089	143	0.68	0.1	0.98	1.05
hSQ026877	NM_022917	NOL6	65083	1.07	1.61	32.09	-0.05	0.75	0.04	90.93	100	-0.07	-0.05	0.29	29.81	61.05	0.86	0.87	0.34	108.17	100	6.89	7.17	0	2	0	0	0	2	0	0	0	0	0	0	0	0	0	1310	3441	101	0.8	0.02	1.01	1.04
hSQ045119	NM_000373	UMPS	7372	1.07	1.61	32.28	-1.71	-0.95	-0.65	90.93	100	2.52	2.2	-1.96	14.69	29.91	0.95	0.89	-0.12	108.64	100	7.09	6.99	0	0	0	0	0	2	2	1	1	1	0	0	0	0	0	697	1443	106	0.75	-0.32	0.94	0.99
hSQ007242	NM_001008530	LGMN	5641	1.07	1.61	32.4	-2.43	-1.43	-0.41	92.38	100	0.52	0.33	-2.84	14.69	20.07	0.97	0.92	0.55	108.17	100	8.2	8.73	0	0	0	0	0	1	2	1	0	0	0	0	0	0	0	507	1302	326	1.01	-0.19	0.95	1.06
hSQ031761	NM_001024956	SC5DL	6309	1.06	1.61	32.45	-1.05	-0.31	-0.65	90.93	100	2.55	2.3	-0.83	19.17	49.36	0.92	0.91	0.49	108.17	100	7.42	7.85	2	1	0	0	0	0	0	0	0	0	0	0	0	0	0	5898	900	221	0.74	-0.25	0.98	1.06
hSQ024543	NM_002197	ACO1	48	1.06	1.61	32.49	0.43	1.22	-0.18	92.38	100	-0.06	-0.14	-1.15	14.69	43.66	0.94	0.91	-0.16	108.64	100	9.64	9.54	1	0	0	0	0	7	1	1	3	0	0	0	0	0	0	721	2670	98	0.79	-0.08	0.97	0.99
hSQ008489	NM_022171	TCTA	6988	1.06	1.61	32.55	-0.38	0.43	0.09	90.93	100	1.53	1.58	0.25	29.81	60.99	0.8	0.8	-0.32	108.64	100	4.27	4.06	2	3	1	1	1	0	0	0	0	0	0	0	0	0	0	1614	312	221	0.8	0.04	1.01	0.95
hSQ030537	NM_018124	RFWD3	55159	1.06	1.61	32.56	-0.84	-0.09	-1.78	7.95	36.2	1.31	0.55	-0.36	21.69	56.5	0.88	0.86	-1.15	76.95	100	8.04	6.57	2	1	1	0	0	0	0	0	0	0	0	0	0	0	0	2528	2325	98	0.74	-0.76	0.98	0.82
hSQ008521	NM_018683	ZNF313	55905	1.06	1.61	32.62	-0.11	0.67	-1.24	25.69	76.37	0.29	-0.23	-2.69	14.69	21.23	0.92	0.86	-1.25	66.03	96.83	4.99	4.38	1	1	1	0	0	0	1	0	0	0	NA	NA	NA	NA	NA	1742	687	NA	0.79	-0.52	0.93	0.88
hSQ018650	NM_001274	CHEK1	1111	1.06	1.61	32.65	-1.67	-0.98	0.05	90.93	100	1.29	1.33	0.86	28.63	58.6	0.76	0.83	1.13	85.33	100	5.72	6.3	0	0	0	0	0	0	1	0	0	0	0	0	0	0	0	422	1431	154	0.7	0.04	1.09	1.1
hSQ041848	NM_001004722	NCK2	8440	1.06	1.61	32.67	-0.29	0.47	-0.81	65.69	100	-0.02	-0.36	0.78	29.71	59.3	0.79	0.85	0.31	108.17	100	4.52	4.73	1	1	1	0	0	0	0	0	0	0	0	0	0	0	0	1263	252	442	0.75	-0.35	1.08	1.05
hSQ021053	NM_144778	MBNL2	10150	1.06	1.61	32.71	2.5	3.29	-1.71	7.95	40.55	-2.09	-2.81	0.39	29.81	61.06	0.8	0.83	-0.23	108.64	100	5.34	5.18	0	1	0	0	0	0	0	0	0	0	0	1	0	0	0	2782	1104	816	0.79	-0.72	1.03	0.97
hSQ019965	NA	LOC283155	283155	1.06	1.61	32.71	-0.55	0.49	-1.46	13.85	58.85	-0.48	-1.41	2.17	21.69	37.91	0.69	0.81	-0.26	108.64	100	4.54	4.31	NA	NA	NA	NA	NA	NA	NA	NA	NA	NA	NA	NA	NA	NA	NA	NA	NA	NA	1.04	-0.94	1.18	0.95
hSQ024754	NA	ncRNA_U25_0	repname(hSQ024754)	1.06	1.61	32.76	-1.88	-0.95	0.31	84.11	99.83	0.15	0.35	0.67	29.81	60.1	0.31	0.39	0.48	108.17	100	2.49	2.73	NA	NA	NA	NA	NA	NA	NA	NA	NA	NA	NA	NA	NA	NA	NA	NA	NA	NA	0.93	0.2	1.26	1.09
hSQ040999	NA	MGC15634	84841	1.06	1.61	32.77	0.67	1.73	-0.06	92.38	100	1.1	1.07	-0.85	19.17	49.01	0.88	0.86	-0.46	108.64	100	4.89	4.65	NA	NA	NA	NA	NA	NA	NA	NA	NA	NA	NA	NA	NA	NA	NA	NA	NA	NA	1.05	-0.03	0.98	0.95
hSQ017485	NM_005439	MLF2	8079	1.06	1.61	32.89	-0.93	-0.29	0.43	84.11	94.99	0.74	0.93	-1.12	14.69	44.28	0.95	0.92	0.2	108.17	100	5.97	6.08	1	0	0	0	0	0	0	0	0	0	0	0	0	0	0	569	747	193	0.64	0.19	0.97	1.02
hSQ015106	NM_013336	SEC61A1	29927	1.05	1.61	33.09	0.58	1.3	-0.72	84.11	100	1.02	0.63	-1.62	14.69	35.25	0.95	0.91	-0.3	108.64	100	8.46	8.13	0	0	0	0	0	0	0	0	0	0	0	0	0	0	0	2020	1431	184	0.71	-0.39	0.96	0.96
hSQ011273	NM_024824	ZC3H14	79882	1.05	1.61	33.11	-1.64	-0.89	-0.6	91.91	100	1.15	0.89	-2.27	14.69	25.66	0.91	0.85	-0.09	108.64	100	6.91	6.86	2	0	0	0	0	2	3	1	0	0	0	0	0	0	0	1757	2211	156	0.75	-0.26	0.94	0.99
hSQ034773	NM_022130	GOLPH3	64083	1.05	1.61	33.11	-1.14	-0.17	-0.83	65.69	100	-0.61	-1	-1.15	14.69	43.74	0.95	0.92	-0.04	108.64	100	5.11	5.06	0	1	0	0	0	0	0	0	0	0	0	0	0	0	0	1494	897	285	0.97	-0.4	0.97	0.99
hSQ018605	NM_006014	LAGE3	8270	1.05	1.61	33.19	-1.32	-0.59	-0.22	92.38	100	2.36	2.27	-1.22	14.69	42.35	0.96	0.91	0.43	108.17	100	4.22	4.44	0	0	0	0	0	1	1	1	0	0	0	0	0	0	0	1042	432	342	0.74	-0.09	0.95	1.05
hSQ012517	NM_006277	ITSN2	50618	1.05	1.61	33.3	1.13	1.99	-0.47	92.38	100	-0.94	-1.13	-0.83	19.17	49.46	0.91	0.88	0.57	108.17	100	5.42	5.74	1	1	1	0	0	4	2	2	0	0	0	0	0	0	0	760	5091	241	0.86	-0.19	0.96	1.06
hSQ024015	NM_020918	GPAM	57678	1.05	1.61	33.38	1.71	2.66	0.02	90.93	100	-0.51	-0.5	0.15	29.81	60.73	0.87	0.88	0.12	108.17	100	6.68	6.75	2	3	2	0	0	1	0	0	0	0	0	0	0	0	0	3686	2487	195	0.95	0.01	1.01	1.01
hSQ012904	NM_000946	PRIM1	5557	1.05	3.09	33.44	-2.15	-1.38	-0.17	92.38	100	1.66	1.57	0.03	29.81	60.17	0.89	0.9	0.52	108.17	100	6.22	6.57	1	0	0	0	0	1	1	0	0	0	0	0	0	0	0	129	1263	64	0.77	-0.09	1	1.06
hSQ033721	NM_001149	ANK3	288	1.05	3.09	33.45	0.67	1.4	-0.04	92.38	100	-1.22	-1.24	-1.26	14.69	41.62	0.9	0.87	0.02	108.17	100	7.4	7.42	0	0	0	0	0	3	3	2	1	0	0	0	0	0	0	1444	3006	621	0.73	-0.02	0.97	1
hSQ017306	NM_006216	SERPINE2	5270	1.05	3.09	33.47	-0.37	0.39	0.01	90.93	100	-1.98	-1.98	-1.83	14.69	31.88	0.97	0.92	-0.1	108.64	100	7.42	7.34	1	1	0	0	0	2	1	1	0	0	0	0	0	0	0	706	1197	200	0.77	0.01	0.95	0.99
hSQ005896	NM_018017	C10orf118	55088	1.05	3.09	33.66	-0.63	0.17	1.34	58.83	58	0.1	0.58	-0.84	19.17	49.21	0.95	0.92	1.12	85.33	100	5.36	5.86	1	0	0	1	0	0	0	0	0	0	0	0	0	0	0	2928	2697	652	0.8	0.48	0.97	1.09
hSQ024723	NM_016940	RWDD2B	10069	1.05	3.09	33.66	-1.34	-0.41	-0.05	92.38	100	0.5	0.47	1.41	25.16	51.53	0.74	0.81	0.13	108.17	100	3.78	3.88	1	0	0	0	0	0	1	0	0	0	0	0	0	0	0	656	960	85	0.94	-0.03	1.09	1.02
hSQ045373	NM_001077180	METTL9	51108	1.04	3.09	33.72	-1.02	-0.22	0.04	90.93	100	-1.25	-1.23	1.1	27.27	56.02	0.64	0.78	-0.25	108.64	100	3.01	2.88	1	1	0	0	0	0	1	0	0	0	0	1	0	0	0	2038	954	199	0.8	0.02	1.21	0.96
hSQ014231	NA	LOC441130	441130	1.04	3.09	33.75	-0.01	1.13	-0.93	52.46	98.27	0.15	-0.37	1.28	26.28	53.53	0.69	0.88	-0.04	108.64	100	3.02	3	NA	NA	NA	NA	NA	NA	NA	NA	NA	NA	NA	NA	NA	NA	NA	NA	NA	NA	1.14	-0.52	1.27	0.99
hSQ002650	NM_001007559	SS18	6760	1.04	3.09	33.76	-1.12	-0.17	-0.25	92.38	100	1.35	1.25	-2.47	14.69	23.34	0.93	0.88	0.11	108.17	100	5.84	5.91	0	2	0	0	0	2	0	0	0	0	0	0	0	0	0	2099	1257	78	0.95	-0.1	0.95	1.01
hSQ008739	NM_018368	LMBRD1	55788	1.04	3.09	33.76	-0.66	-0.04	0.07	90.93	100	0.51	0.54	-2.28	14.69	25.49	0.95	0.9	-0.11	108.64	100	7.79	7.72	0	0	0	0	0	2	1	1	0	0	0	0	0	0	0	299	1623	115	0.62	0.03	0.95	0.99
hSQ025188	NM_004393	DAG1	1605	1.04	3.09	33.77	2.31	3.13	-0.66	90.93	100	1.07	0.8	-1.5	14.69	37.31	0.97	0.94	-0.96	108.63	100	9.75	8.62	4	0	0	0	0	3	3	0	0	0	0	0	0	0	0	2416	2688	418	0.82	-0.27	0.96	0.88
hSQ035380	NM_017667	CCDC132	55610	1.04	3.09	33.8	0.01	1	-0.62	91.61	100	-0.14	-0.54	1.34	25.16	52.61	0.71	0.8	0.27	108.17	100	6.17	6.42	0	0	0	0	0	3	2	1	0	0	0	0	0	0	0	589	2895	128	1	-0.4	1.12	1.04
hSQ021076	NM_017694	FLJ20160	54842	1.04	3.09	33.8	1.8	2.61	-1.6	9.09	48.08	-2.98	-3.63	-0.29	21.69	57.4	0.9	0.89	-0.44	108.64	100	4.68	4.41	2	1	0	0	0	0	1	0	0	0	1	0	0	0	0	2097	2376	324	0.81	-0.65	0.99	0.94
hSQ000532	NM_001042589	C9orf127	51754	1.04	3.09	33.84	0.21	0.92	-0.52	92.38	100	0.54	0.27	2.22	21.69	36.9	0.66	0.83	0.06	108.17	100	3.58	3.61	1	0	0	0	0	0	0	0	0	0	0	2	0	0	0	1006	1419	1015	0.71	-0.27	1.26	1.01
hSQ025240	NM_005109	OXSR1	9943	1.04	3.09	33.92	1.75	2.53	0.09	90.93	100	-0.2	-0.16	-0.79	19.17	50.12	0.9	0.87	0.45	108.17	100	8.02	8.32	2	1	0	1	0	1	1	1	0	0	0	0	0	0	0	2596	1584	342	0.78	0.04	0.98	1.04
hSQ021779	NM_002372	MAN2A1	4124	1.04	3.09	33.99	-1.13	-0.04	-0.4	92.38	100	-1.91	-2.17	-1.2	14.69	42.81	0.9	0.86	-1.3	59.85	94.46	5.9	5	0	0	0	0	0	2	2	0	1	0	0	0	0	0	0	730	3435	963	1.08	-0.25	0.96	0.85
hSQ013296	NM_002923	RGS2	5997	1.04	3.09	34.04	0.37	1.49	0.29	84.11	100	1.53	1.68	-0.85	19.17	49.07	0.84	0.8	-0.1	108.64	100	5.8	5.7	0	0	0	0	0	0	0	0	0	0	NA	NA	NA	NA	NA	677	636	NA	1.12	0.14	0.95	0.98
hSQ034922	NM_031902	MRPS5	64969	1.04	3.09	34.09	-1.52	-0.82	0.32	84.11	99.62	1.47	1.57	-2.09	14.69	27.96	0.97	0.91	0.48	108.17	100	7.11	7.61	1	0	0	0	0	0	0	0	0	0	0	0	0	0	0	149	1293	218	0.7	0.11	0.94	1.07
hSQ025001	NM_080669	SLC46A1	113235	1.04	3.09	34.1	1.78	2.67	-0.2	92.38	100	3.8	3.67	-1.42	14.69	38.82	0.93	0.9	-0.09	108.64	100	5.88	5.8	6	1	1	1	0	2	0	0	0	0	0	0	0	0	0	5011	1381	96	0.88	-0.12	0.96	0.99
hSQ011062	NM_001660	ARF4	378	1.04	3.09	34.22	-1.34	-0.66	0.15	90.93	100	1.38	1.46	-1.56	14.69	36.24	0.99	0.95	0.23	108.17	100	7.51	7.87	0	0	0	0	0	0	0	0	0	0	0	0	0	0	0	849	543	211	0.68	0.09	0.96	1.05
hSQ035486	NA	TRNK::ND2	4566::4536	1.04	3.09	34.31	-0.28	0.42	0.01	90.93	100	2.69	2.7	-0.48	21.69	54.96	0.74	0.7	0.44	108.17	100	4.2	4.61	NA	NA	NA	NA	NA	NA	NA	NA	NA	NA	NA	NA	NA	NA	NA	NA	NA	NA	0.7	0.01	0.95	1.1
hSQ026702	NM_004930	CAPZB	832	1.04	3.09	34.31	-1.53	-0.84	0.05	90.93	100	0.11	0.14	-1.96	14.69	29.83	0.95	0.9	0.47	108.17	100	6.03	6.34	0	0	0	0	0	2	1	1	0	0	0	0	0	0	0	751	819	60	0.69	0.03	0.94	1.05
hSQ021557	NM_001013438	FXR1	8087	1.04	3.09	34.33	1.99	3.17	-0.88	58.83	100	-0.35	-0.72	-1.19	14.69	42.92	0.88	0.84	-1.37	56.69	91.36	7.41	6.67	1	1	1	0	0	0	0	0	0	0	NA	NA	NA	NA	NA	1022	1620	NA	1.18	-0.37	0.95	0.9
hSQ008627	NM_003093	SNRPC	6631	1.04	3.09	34.34	-1.07	-0.19	-0.05	92.38	100	2.78	2.75	-1.63	14.69	35.1	1	0.96	1.05	108.17	100	7.12	8.72	0	0	0	0	0	0	0	0	0	0	NA	NA	NA	NA	NA	224	480	NA	0.88	-0.03	0.96	1.22
hSQ044993	NM_002154	HSPA4	3308	1.04	3.09	34.35	-2.08	-1.41	-0.35	92.38	100	2	1.85	-2.3	14.69	25.31	0.98	0.93	-0.02	108.64	100	10.7	10.69	0	0	0	0	0	2	1	1	1	0	0	0	0	0	0	580	2523	281	0.67	-0.15	0.94	1
hSQ033659	NM_000181	GUSB	2990	1.03	3.09	34.4	0.78	1.72	0.35	84.11	98.48	0.28	0.45	1.05	27.27	56.58	0.76	0.8	-0.45	108.64	100	5.74	5.5	0	1	0	0	0	0	0	0	0	0	0	0	0	0	0	209	1956	76	0.94	0.17	1.05	0.96
hSQ017835	NM_015511	C20orf4	25980	1.03	3.09	34.42	1.74	2.64	-0.28	92.38	100	1.17	1.01	-1.31	14.69	40.76	0.91	0.88	-1.61	37.98	77.65	7.71	6.73	1	1	1	0	0	1	1	1	0	0	1	1	1	0	0	1186	1155	306	0.91	-0.16	0.97	0.87
hSQ004843	NM_001017405	MAEA	10296	1.03	3.09	34.45	-0.08	0.54	0.03	90.93	100	1.82	1.84	-2.15	14.69	27.25	0.97	0.9	-0.11	108.64	100	7.77	7.66	0	0	0	0	0	0	0	0	0	0	NA	NA	NA	NA	NA	967	1191	NA	0.62	0.01	0.92	0.99
hSQ020926	NM_206824	VKORC1	79001	1.03	3.09	34.48	-0.67	0	-0.35	92.38	100	1.4	1.16	-2.54	14.69	22.64	0.97	0.92	-0.1	108.64	100	5.21	5.15	0	1	0	0	0	0	0	0	0	0	0	0	0	0	0	382	279	226	0.67	-0.24	0.95	0.99
hSQ044899	NA	LOC442060	442060	1.03	3.09	34.5	-0.64	0.02	-0.48	92.38	100	1.95	1.72	-1.88	14.69	31.03	0.97	0.92	-0.09	108.64	100	5.99	5.93	NA	NA	NA	NA	NA	NA	NA	NA	NA	NA	NA	NA	NA	NA	NA	NA	NA	NA	0.66	-0.23	0.95	0.99
hSQ016834	NM_016131	RAB10	10890	1.03	3.09	34.63	-1.72	-0.98	-0.26	92.38	100	0.55	0.44	-1.83	14.69	31.81	0.92	0.89	0.93	108.17	100	6.15	6.61	2	1	1	1	1	1	0	0	0	0	0	0	0	0	0	2388	603	504	0.74	-0.11	0.97	1.08
hSQ006382	NM_139273	CARS	833	1.03	3.09	34.75	-0.78	-0.11	-0.64	90.93	100	0.79	0.52	-1.48	14.69	37.7	0.93	0.88	-0.45	108.64	100	7.65	7.17	0	0	0	0	0	2	1	0	1	0	0	0	0	0	0	258	2181	74	0.66	-0.27	0.95	0.94
hSQ021037	NM_002648	PIM1	5292	1.02	3.09	35.02	1.81	2.62	0.65	74.83	85.88	-2.05	-1.65	1.58	23.79	48.7	0.65	0.72	-0.74	108.64	100	5.85	5.53	3	2	2	0	0	0	0	0	0	0	0	0	0	0	0	1335	942	366	0.81	0.4	1.11	0.95
hSQ017061	NM_021932	RIC8A	60626	1.02	3.09	35.21	1.47	2.19	-0.58	91.91	100	1.32	0.97	-1.52	14.69	36.96	0.95	0.92	0.07	108.17	100	6.07	6.11	0	0	0	0	0	0	1	0	0	0	0	0	0	0	0	758	1614	325	0.72	-0.34	0.96	1.01
hSQ041542	NM_016551	TM7SF3	51768	1.02	3.09	35.26	-1.61	-0.76	-0.06	92.38	100	-0.03	-0.05	-0.24	21.69	57.93	0.85	0.83	0.58	108.17	100	3.48	3.88	0	1	0	0	0	1	1	1	0	0	NA	NA	NA	NA	NA	760	1713	NA	0.86	-0.03	0.98	1.11
hSQ030513	NM_000320	QDPR	5860	1.02	3.09	35.26	0.62	1.32	-0.3	92.38	100	0.45	0.29	-1.32	14.69	40.49	0.94	0.9	0.04	108.17	100	4.85	4.87	1	1	0	1	0	0	0	0	0	0	NA	NA	NA	NA	NA	731	735	NA	0.71	-0.17	0.96	1
hSQ022656	NM_002154	HSPA4	3308	1.02	3.09	35.33	-0.99	-0.28	-0.54	92.38	100	2.3	2.01	-1.19	14.69	42.85	0.98	0.95	-0.12	108.64	100	12.55	12.37	0	0	0	0	0	2	1	1	1	0	0	0	0	0	0	580	2523	281	0.71	-0.3	0.97	0.99
hSQ039290	NM_003132	SRM	6723	1.02	3.09	35.35	-0.56	0.08	0.42	84.11	95.39	2.13	2.33	0.06	29.81	60.34	0.84	0.85	0.1	108.17	100	4.91	4.95	1	1	0	0	0	1	0	0	0	0	0	0	0	0	0	273	909	91	0.64	0.2	1	1.01
hSQ015418	NM_015939	TRMT6	51605	1.02	3.09	35.38	-1.53	-0.8	0.21	90.93	100	1.81	1.9	-1.49	14.69	37.46	0.94	0.91	-1.27	59.85	95.89	7.87	7.31	1	0	0	0	0	0	0	0	0	0	0	0	0	0	0	695	1494	122	0.73	0.09	0.96	0.93
hSQ030256	NM_013448	BAZ1A	11177	1.02	3.09	35.56	-1.78	-0.87	-0.42	92.38	100	1.39	1.16	-0.5	21.69	54.63	0.95	0.93	0.29	108.17	100	7.59	7.77	0	0	0	0	0	2	2	1	2	1	1	0	0	0	0	775	4671	568	0.92	-0.23	0.98	1.02
hSQ032156	NM_005839	SRRM1	10250	1.02	3.09	35.57	-2.36	-1.62	0.55	84.11	90.3	0.19	0.45	-0.86	19.17	48.9	0.86	0.82	-0.35	108.64	100	6.91	6.62	0	0	0	0	0	0	0	0	0	0	0	0	0	0	0	994	2715	224	0.74	0.26	0.96	0.96
hSQ010546	NM_152682	RWDD4A	201965	1.02	3.09	35.57	-1.15	-0.38	-0.1	92.38	100	0.1	0.05	1.57	23.79	48.85	0.68	0.83	0.6	108.17	100	3.23	3.56	2	1	0	2	0	0	0	0	0	0	1	0	0	0	0	1800	567	226	0.77	-0.05	1.22	1.1
hSQ045384	NA	FLJ20674::LOC144305	54621::144305	1.02	3.09	35.58	1.09	2.02	0.35	84.11	98.56	0.15	0.35	2.98	8.94	23.57	0.46	0.81	0.45	108.17	100	2.71	3.01	NA	NA	NA	NA	NA	NA	NA	NA	NA	NA	NA	NA	NA	NA	NA	NA	NA	NA	0.92	0.2	1.78	1.11
hSQ007784	NM_138418	C16orf14	84331	1.02	3.09	35.59	-0.38	0.6	-0.13	92.38	100	0.27	0.21	0.94	28.01	57.88	0.71	0.79	0.74	108.17	100	3.37	3.88	0	0	0	0	0	0	0	0	0	0	0	0	0	0	0	284	483	143	0.98	-0.06	1.11	1.15
hSQ024936	NM_145058	RILPL2	196383	1.02	3.09	35.64	-0.18	0.47	-0.74	74.83	100	0.92	0.54	-2.06	14.69	28.47	0.95	0.91	-0.24	108.64	100	3.56	3.44	1	0	0	0	0	0	0	0	0	0	0	0	0	0	0	502	636	297	0.65	-0.38	0.96	0.97
hSQ004990	NM_018845	RAG1AP1	55974	1.01	3.09	35.76	-1.09	-0.36	-2.25	3.76	13.29	1.49	0.37	-1.6	14.69	35.62	0.89	0.8	-0.39	108.64	100	4.28	4.04	3	0	0	3	0	0	1	0	0	0	0	0	0	0	0	570	666	62	0.73	-1.12	0.9	0.94
hSQ036077	NM_015446	AHCTF1	25909	1.01	3.09	35.84	0.12	1.38	0.04	90.93	100	-1.17	-1.13	0.8	29.5	59.12	0.85	0.92	0.11	108.17	100	6.03	6.19	1	1	0	0	0	1	2	0	0	0	NA	NA	NA	NA	NA	1704	6801	NA	1.25	0.03	1.09	1.03
hSQ015848	NM_024824	ZC3H14	79882	1.01	3.09	35.96	-1.49	-0.77	-0.49	92.38	100	1.14	0.95	-2.89	14.69	19.69	0.89	0.84	-0.07	108.64	100	6.6	6.55	2	0	0	0	0	2	3	1	0	0	0	0	0	0	0	1757	2211	156	0.72	-0.19	0.93	0.99
hSQ019825	NM_152339	SPATA2L	124044	1.01	3.09	36.01	1.03	2.05	-0.4	92.38	100	0.99	0.78	0.55	29.81	60.69	0.76	0.82	0.29	108.17	100	5.72	6.05	1	2	0	0	0	0	1	0	0	0	0	0	0	0	0	977	1275	65	1.02	-0.21	1.07	1.06
hSQ032433	NM_032199	ARID5B	84159	1.01	3.09	36.04	2.22	2.97	-0.27	92.38	100	-1.11	-1.24	-0.36	21.69	56.56	0.88	0.86	-0.11	108.64	100	6.07	6.01	1	1	1	0	0	1	0	0	0	0	NA	NA	NA	NA	NA	3914	3567	NA	0.75	-0.13	0.98	0.99
hSQ016845	NA	PIK3C2A	5286	1.01	3.09	36.07	-1.88	-1.17	-0.76	74.83	100	-0.58	-1.03	-2.22	14.69	26.3	0.98	0.92	-0.32	108.64	100	5.63	5.33	NA	NA	NA	NA	NA	NA	NA	NA	NA	NA	NA	NA	NA	NA	NA	NA	NA	NA	0.71	-0.46	0.94	0.95
hSQ000588	NM_019845	RPRM	56475	1.01	3.09	36.13	1.37	2.09	1.04	65.69	69.43	0.26	0.87	0.18	29.81	60.83	0.77	0.78	0.07	108.17	100	3.68	3.73	0	0	0	0	0	0	0	0	0	0	0	0	0	0	0	898	330	243	0.72	0.61	1.02	1.01
hSQ042282	NM_012279	ZNF346	23567	1.01	3.09	36.15	2.9	3.92	0.05	90.93	100	2.11	2.14	-0.01	21.69	59.92	0.85	0.85	0.05	108.17	100	5.19	5.22	2	1	0	0	0	0	0	0	0	0	NA	NA	NA	NA	NA	2143	885	NA	1.01	0.03	1	1.01
hSQ026984	NM_145266	NUDCD2	134492	1.01	3.09	36.16	-1.54	-0.55	-0.61	91.61	100	0.65	0.23	0.31	29.81	61.07	0.85	0.88	0.87	108.17	100	2.78	3.3	1	1	1	0	0	0	0	0	0	0	0	0	0	0	0	386	474	87	0.99	-0.43	1.03	1.19
hSQ000163	NM_013411	AK2	204	1.01	3.09	36.23	-1.56	-0.86	-1	43.3	93.57	1.93	1.43	-3.93	9.63	15.45	0.96	0.86	-0.5	108.64	100	5.5	5.19	4	1	1	0	0	0	0	0	0	0	0	0	0	0	0	2844	699	63	0.7	-0.5	0.9	0.94
hSQ009338	NM_001690	ATP6V1A	523	1.01	3.09	36.29	-1.35	-0.69	-0.67	90.93	100	0.92	0.66	-0.59	21.69	53.33	0.92	0.9	-0.62	108.64	100	8.69	8.03	0	1	0	0	0	1	1	1	0	0	0	0	0	0	0	2627	1854	66	0.66	-0.26	0.98	0.92
hSQ017615	NM_001690	ATP6V1A	523	1	3.09	36.35	0.49	1.23	-0.2	92.38	100	1.02	0.91	-1.45	14.69	38.19	0.95	0.92	-0.31	108.64	100	10.81	10.47	0	1	0	0	0	1	1	1	0	0	0	0	0	0	0	2627	1854	66	0.74	-0.11	0.97	0.97
hSQ032290	NM_182765	HECTD2	143279	1	3.09	36.39	1.33	2.23	-0.57	92.3	100	-1.24	-1.54	1.04	27.27	56.79	0.62	0.79	0.44	108.17	100	3.74	3.92	2	1	1	0	0	2	0	0	0	0	0	0	0	0	0	2379	2331	94	0.9	-0.3	1.28	1.05
hSQ004083	NM_024104	C19orf42	79086	1	3.09	36.47	0.25	1.02	-0.49	92.38	100	0.64	0.37	-1.17	14.69	43.23	0.96	0.92	-0.42	108.64	100	3.35	3.11	1	0	0	0	0	0	0	0	0	0	NA	NA	NA	NA	NA	1092	228	NA	0.77	-0.27	0.96	0.93
hSQ015643	NM_002570	PCSK6	5046	1	3.09	36.48	1.49	2.47	-1.51	11.29	55.15	0.74	0.13	1.4	25.16	51.69	0.52	0.66	-0.48	108.64	100	4.49	4.19	2	1	0	1	0	1	3	0	1	0	0	0	0	0	0	1329	2908	314	0.99	-0.61	1.26	0.93
hSQ004995	NM_006908	RAC1	5879	1	3.09	36.53	-0.01	0.77	0.35	84.11	98.37	1.02	1.22	-1.04	14.69	45.71	0.97	0.95	0.13	108.17	100	6.48	6.59	0	0	0	0	0	0	0	0	0	0	0	0	0	0	0	1521	579	241	0.77	0.21	0.97	1.02
hSQ005283	NM_017952	PTCD3	55037	1	3.09	36.65	2.62	3.62	0	92.38	100	0.53	0.53	0.54	29.81	60.71	0.86	0.87	-0.64	108.64	100	6.51	6.17	4	1	1	1	1	2	2	2	1	1	NA	NA	NA	NA	NA	4598	2070	NA	1	0	1.01	0.95
hSQ020431	NM_000075	CDK4	1019	1	3.09	36.71	-0.77	-0.08	-2.31	3.76	11.5	2.03	1.04	-2.7	14.69	21.22	0.97	0.91	-0.55	108.64	100	5.15	4.9	2	0	0	1	0	1	1	0	0	0	0	0	0	0	0	303	912	226	0.69	-0.99	0.93	0.95
hSQ043155	NM_004308	ARHGAP1	392	1	3.09	36.74	1.83	2.66	0.15	90.93	100	0.31	0.39	-2.02	14.69	28.99	0.95	0.92	-0.77	108.64	100	7.6	7.19	1	2	0	1	0	0	1	0	0	0	0	0	0	0	0	1955	1320	69	0.83	0.08	0.96	0.95
hSQ025300	NM_001080481	USP45	85015	1	3.09	36.94	0.15	1.1	-0.38	92.38	100	-0.07	-0.31	0.71	29.81	59.8	0.71	0.8	0.06	108.17	100	3.15	3.18	2	1	1	0	0	0	2	0	0	0	0	0	0	0	0	3407	2445	533	0.95	-0.24	1.13	1.01
hSQ023465	NM_024595	C1orf108	79647	1	3.09	36.95	-1.76	-1.1	1.02	65.69	70.14	1.42	1.83	-0.93	14.69	47.69	0.9	0.87	0.99	108.17	100	4.41	4.92	1	0	0	0	0	0	0	0	0	0	0	0	0	0	0	1252	579	136	0.67	0.41	0.97	1.11
hSQ021020	NM_019042	PUS7	54517	0.99	3.09	37.03	0.33	1.34	-1.44	13.85	60.6	0.88	0.01	-0.4	21.69	55.98	0.9	0.88	-0.24	108.64	100	6.28	6.05	3	1	1	0	0	0	1	0	0	0	0	0	0	0	0	1275	1986	219	1.02	-0.87	0.98	0.96
hSQ032312	NM_007085	FSTL1	11167	0.99	3.09	37.07	-1.25	-0.33	-0.24	92.38	100	-2.22	-2.35	-2.9	14.69	19.58	0.96	0.89	0.55	108.17	100	5.93	6.26	2	2	2	1	1	0	2	0	0	0	0	0	0	0	0	2672	927	82	0.92	-0.13	0.93	1.06
hSQ042508	NM_001007277	EI24	9538	0.99	3.09	37.15	-0.3	0.54	-0.14	92.38	100	2.29	2.21	1.9	22.31	42.97	0.42	0.68	0.19	108.17	100	2.96	3.09	1	1	0	0	0	1	0	0	0	0	0	0	0	0	0	1118	788	242	0.84	-0.08	1.6	1.04
hSQ012170	NM_001102396	RP5-1000E10.4	80143	0.99	3.09	37.2	-2.52	-1.59	-0.36	92.38	100	0.34	0.04	-0.04	21.69	59.67	0.9	0.89	0.59	108.17	100	2.64	2.99	2	2	1	0	0	0	0	0	0	0	0	0	0	0	0	4787	636	80	0.93	-0.3	1	1.13
hSQ018384	NM_005720	ARPC1B	10095	0.99	3.09	37.2	-1.05	-0.44	-1.24	25.69	76.13	-0.49	-1.09	0.73	29.81	59.72	0.66	0.74	-0.33	108.64	100	6.22	6.05	2	1	1	0	0	0	0	0	0	0	0	0	0	0	0	290	1119	89	0.62	-0.6	1.11	0.97
hSQ008620	NM_000270	NP	4860	0.99	3.09	37.22	-1.25	-0.48	-0.89	58.83	100	3.25	2.79	-1.45	14.69	38.15	0.93	0.87	0.6	108.17	100	7.23	8.01	2	1	0	1	0	0	0	0	0	0	0	0	0	0	0	488	870	142	0.77	-0.46	0.93	1.11
hSQ039227	NA	RNU22	9304	0.99	3.09	37.24	-1.47	-0.76	0.2	90.93	100	0.04	0.14	-0.66	21.69	52.28	0.79	0.73	0.09	108.17	100	2.66	2.71	NA	NA	NA	NA	NA	NA	NA	NA	NA	NA	NA	NA	NA	NA	NA	NA	NA	NA	0.72	0.1	0.93	1.02
hSQ005502	NM_000167	GK	2710	0.99	3.09	37.33	-1.53	-0.74	-0.33	92.38	100	-0.9	-1.06	-1.03	14.69	45.9	0.91	0.89	-0.15	108.64	100	6.37	6.23	0	0	0	0	0	0	0	0	0	0	0	0	0	0	0	1865	1575	115	0.8	-0.16	0.98	0.98
hSQ034522	NM_022132	MCCC2	64087	0.99	3.09	37.37	0.25	1.13	-0.5	92.38	100	1.08	0.84	-0.79	19.17	50.09	0.92	0.9	0.03	108.17	100	8.11	8.13	0	0	0	0	0	0	3	0	0	0	0	0	0	0	0	538	1692	99	0.88	-0.24	0.98	1
hSQ011076	NM_014267	C11orf58	10944	0.99	3.09	37.39	-1.09	-0.17	-0.15	92.38	100	1.58	1.49	-0.98	14.69	46.67	0.97	0.95	0.12	108.17	100	5.77	5.92	0	0	0	0	0	0	0	0	0	0	0	0	0	0	0	922	552	132	0.91	-0.09	0.97	1.03
hSQ020535	NM_002267	KPNA3	3839	0.99	3.09	37.43	1.05	1.71	-0.78	65.69	100	1.36	0.97	-0.85	19.17	49.12	0.92	0.9	-1.6	37.98	78.24	8.17	7.15	1	1	1	0	0	0	0	0	0	0	0	0	0	0	0	2474	1566	415	0.66	-0.39	0.98	0.88
hSQ032186	NM_000946	PRIM1	5557	0.99	3.09	37.47	-1.13	-0.52	0.01	90.93	100	1.47	1.47	-1.48	14.69	37.78	0.95	0.92	0.21	108.17	100	6.64	6.78	1	0	0	0	0	1	1	0	0	0	0	0	0	0	0	129	1263	64	0.61	0	0.96	1.02
hSQ018922	NM_013349	NENF	29937	0.99	3.09	37.56	0.35	1.1	0.17	90.93	100	1.67	1.76	-0.01	21.69	59.9	0.85	0.85	0.56	108.17	100	3.84	4.37	0	0	0	0	0	1	0	0	0	0	NA	NA	NA	NA	NA	371	519	NA	0.75	0.09	1	1.14
hSQ024815	NM_014501	UBE2S	27338	0.99	3.09	37.59	-0.9	-0.2	0.02	90.93	100	1.96	1.97	0.24	29.81	60.97	0.86	0.87	0.18	108.17	100	5.39	5.54	0	0	0	0	0	0	1	0	0	0	0	0	0	0	0	154	669	368	0.7	0.01	1.01	1.03
hSQ008317	NM_004130	GYG1	2992	0.98	3.09	37.67	-1.26	-0.64	-0.3	92.38	100	1.25	1.12	-0.62	21.69	52.82	0.92	0.89	-0.03	108.64	100	7.49	7.46	0	0	0	0	0	0	0	0	0	0	0	0	0	0	0	698	1053	53	0.61	-0.13	0.97	1
hSQ040316	NM_152383	MGC42174	129563	0.98	3.09	37.88	-0.2	0.48	-0.2	92.38	100	-0.76	-0.87	1.43	25.16	51.15	0.76	0.82	-0.08	108.64	100	7.07	7.01	0	0	0	0	0	0	2	0	0	0	0	0	0	0	0	568	2658	276	0.67	-0.11	1.07	0.99
hSQ002813	NM_024731	C16orf44	79786	0.98	3.09	37.88	-1.6	-0.64	0	92.38	100	-0.97	-0.97	-2.3	14.69	25.25	0.95	0.89	-0.62	108.64	100	4.46	4.06	0	0	0	0	0	2	0	0	0	0	0	0	0	0	0	176	1851	141	0.97	0	0.94	0.91
hSQ044345	NM_152903	KBTBD6	89890	0.98	3.09	37.91	-1.71	-0.99	0	90.93	100	1.58	1.59	0.27	29.81	61.02	0.8	0.82	0.15	108.17	100	8.29	8.4	1	0	0	1	0	2	1	0	0	0	0	0	0	0	0	2914	2025	289	0.72	0	1.02	1.01
hSQ019454	NM_033198	PIGS	94005	0.98	3.09	37.95	-0.1	0.59	0.24	90.93	100	1.51	1.62	-0.33	21.69	56.92	0.9	0.89	-0.2	108.64	100	5.26	5.17	1	0	0	0	0	4	2	0	1	0	NA	NA	NA	NA	NA	832	1668	NA	0.69	0.11	0.98	0.98
hSQ033144	NM_198549	FAM73A	374986	0.98	3.09	38.1	0.68	1.49	-0.77	74.83	100	0.44	-0.11	0.56	29.81	60.65	0.81	0.83	-0.47	108.64	100	5.76	5.39	2	1	0	0	0	0	1	0	0	0	NA	NA	NA	NA	NA	3332	1899	NA	0.81	-0.54	1.02	0.94
hSQ001307	NM_032495	HOPX	84525	0.98	3.09	38.15	-0.71	0.55	-0.41	92.38	100	4.05	3.78	1.6	22.99	48.4	0.65	0.88	0.17	108.17	100	2.08	2.16	0	0	0	0	0	0	1	0	0	0	1	0	0	0	0	721	222	282	1.26	-0.27	1.34	1.04
hSQ026741	NM_138418	C16orf14	84331	0.98	3.09	38.27	-1.02	-0.15	-0.01	92.38	100	0.51	0.5	0.64	29.81	60.25	0.77	0.81	0.84	108.17	100	3.55	4.16	0	0	0	0	0	0	0	0	0	0	0	0	0	0	0	284	483	143	0.87	-0.01	1.06	1.17
hSQ038035	NM_004515	ILF2	3608	0.98	3.09	38.28	-0.9	-0.1	0.05	90.93	100	2.44	2.47	-3.14	9.63	18.09	0.97	0.92	0.62	108.17	100	9.17	9.93	0	0	0	0	0	1	1	1	1	1	0	0	0	0	0	357	1173	81	0.8	0.03	0.94	1.08
hSQ014819	NA	LRRC8C	84230	0.97	3.09	38.3	-0.81	-0.18	-0.31	92.38	100	-0.09	-0.24	-0.32	21.69	56.98	0.84	0.83	-1.93	34.95	60.54	6.88	5.64	NA	NA	NA	NA	NA	NA	NA	NA	NA	NA	NA	NA	NA	NA	NA	NA	NA	NA	0.63	-0.14	0.99	0.82
hSQ008926	NM_006493	CLN5	1203	0.97	3.09	38.3	-1.37	-0.66	-0.57	92.3	100	0.95	0.71	0.08	29.81	60.44	0.86	0.87	0.1	108.17	100	5.19	5.25	0	1	0	0	0	0	0	0	0	0	0	1	0	0	0	1547	1224	1292	0.71	-0.24	1	1.01
hSQ032083	NM_194318	B3GALTL	145173	0.97	3.09	38.33	1.6	2.25	-0.83	65.69	100	1.89	1.51	0.49	29.81	60.87	0.88	0.89	-0.18	108.64	100	4.95	4.86	1	2	1	0	0	1	1	0	0	0	0	0	0	0	0	2606	1497	110	0.65	-0.38	1.01	0.98
hSQ037174	NM_213662	STAT3	6774	0.97	3.09	38.4	-0.92	-0.29	-0.46	92.38	100	-0.47	-0.72	-0.24	21.69	57.9	0.88	0.87	-1.62	37.98	77.41	8.64	7.27	1	3	1	1	1	1	2	1	0	0	0	0	0	0	0	2514	2169	132	0.63	-0.25	0.99	0.84
hSQ021255	NM_016355	DDX47	51202	0.97	3.09	38.41	0.82	1.48	-0.38	92.38	100	1.99	1.79	-1.3	14.69	40.96	0.95	0.92	-1.93	34.95	60.56	9.22	7.99	1	0	0	0	0	0	0	0	0	0	NA	NA	NA	NA	NA	421	1368	NA	0.66	-0.2	0.96	0.87
hSQ000100	NM_013256	ZNF180	7733	0.97	3.09	38.49	1.95	2.92	0.28	84.11	100	-0.01	0.19	1.43	25.16	51.16	0.68	0.85	0.19	108.17	100	4.49	4.62	0	0	0	0	0	1	1	0	1	0	0	0	0	0	0	758	2079	263	0.98	0.21	1.26	1.03
hSQ042326	NM_001039366	ATP6V1E1	529	0.97	3.09	38.51	-1.54	-0.85	-0.25	92.38	100	1.76	1.61	-2.65	14.69	21.64	0.95	0.91	0.07	108.17	100	6.46	6.53	1	0	0	0	0	0	0	0	0	0	0	0	0	0	0	537	615	187	0.68	-0.15	0.96	1.01
hSQ041473	NM_017875	SLC25A38	54977	0.97	3.09	38.73	-1.19	-0.5	-0.47	92.38	100	2.01	1.8	-1.82	14.69	32.06	0.9	0.84	-0.08	108.64	100	4.84	4.78	2	0	0	0	0	0	1	0	0	0	0	0	0	0	0	707	915	377	0.69	-0.21	0.93	0.99
hSQ014262	NM_005327	HADH	3033	0.97	3.09	38.79	1.76	2.76	-1.65	9.09	44.52	1.23	0.45	-1.85	14.69	31.46	0.94	0.89	-0.11	108.64	100	7.65	7.57	2	2	1	0	0	0	1	0	0	0	0	0	0	0	0	817	945	149	1.01	-0.78	0.95	0.99
hSQ004000	NM_012279	ZNF346	23567	0.97	3.09	38.85	-1.9	-0.87	-0.16	92.38	100	2.02	1.92	-0.75	19.17	50.76	0.86	0.82	1.53	85.33	100	4.36	5.04	2	1	0	0	0	0	0	0	0	0	NA	NA	NA	NA	NA	2143	885	NA	1.03	-0.1	0.96	1.16
hSQ005566	NM_002692	POLE2	5427	0.97	3.09	38.88	-2.34	-1.71	-0.17	92.38	100	1.84	1.76	-2.34	14.69	24.78	0.94	0.88	0.22	108.17	100	6.17	6.37	0	0	0	0	0	1	0	0	0	0	NA	NA	NA	NA	NA	89	1584	NA	0.63	-0.07	0.94	1.03
hSQ017391	NM_004235	KLF4	9314	0.97	3.09	38.9	0.68	2.03	-0.46	92.38	100	-2.14	-2.47	-0.72	19.17	51.19	0.82	0.78	-0.54	108.64	100	5.05	4.7	2	0	0	2	0	0	0	0	0	0	0	0	0	0	0	897	1413	329	1.34	-0.33	0.94	0.93
hSQ045438	NM_153810	C10orf46	143384	0.97	3.09	38.92	0.5	1.42	-0.62	91.61	100	1.5	1.17	0.49	29.81	60.87	0.84	0.87	-0.52	108.64	100	3.63	3.36	2	2	1	0	0	1	1	0	0	0	0	1	0	0	0	5146	1110	484	0.91	-0.33	1.03	0.93
hSQ034360	NM_015702	C2orf25	27249	0.96	5.49	39.07	-1.42	-0.73	0.07	90.93	100	1.84	1.88	-1.47	14.69	37.93	0.93	0.88	0.16	108.17	100	6.68	6.79	0	0	0	0	0	0	0	0	0	0	0	0	0	0	0	336	891	146	0.69	0.03	0.94	1.02
hSQ031556	NM_012104	BACE1	23621	0.96	5.49	39.09	2.29	3.05	-0.52	92.38	100	-2.24	-2.47	0.26	29.81	61.01	0.89	0.91	-0.61	108.64	100	4.09	3.76	4	1	0	1	0	0	0	0	0	0	0	0	0	0	0	3865	1506	461	0.76	-0.23	1.02	0.92
hSQ026978	NM_001005739	VPS54	51542	0.96	5.49	39.09	1.56	2.19	-1.09	35.24	87.69	-0.58	-1.24	-0.1	21.69	59.22	0.87	0.86	0.02	108.17	100	4.02	4.03	0	0	0	0	0	1	2	0	0	0	0	0	0	0	0	896	2898	163	0.63	-0.66	0.99	1
hSQ043633	NA	LOC151162	151162	0.96	5.49	39.21	1.06	2.02	-0.58	91.91	100	-0.35	-0.67	-2.01	14.69	29.13	0.96	0.91	-1.17	71.06	100	6.29	5.61	NA	NA	NA	NA	NA	NA	NA	NA	NA	NA	NA	NA	NA	NA	NA	NA	NA	NA	0.96	-0.33	0.94	0.89
hSQ026612	NM_004905	PRDX6	9588	0.96	5.49	39.23	-1.45	-0.74	-0.76	74.83	100	1.99	1.59	-1.85	14.69	31.51	0.95	0.89	-0.2	108.64	100	6.41	6.25	2	1	1	0	0	0	0	0	0	0	0	0	0	0	0	945	675	51	0.71	-0.4	0.94	0.98
hSQ000275	NA	TRNK::mtRNA_ATP8	4566	0.96	5.49	39.3	-1.27	-0.56	0.12	90.93	100	2.37	2.47	0.46	29.81	60.95	0.6	0.64	-0.09	108.64	100	3.11	3.04	NA	NA	NA	NA	NA	NA	NA	NA	NA	NA	NA	NA	NA	NA	NA	NA	NA	NA	0.71	0.11	1.06	0.98
hSQ014659	NM_014501	UBE2S	27338	0.96	5.49	39.34	-0.92	-0.23	0.19	90.93	100	2.51	2.59	-3.36	9.63	17.05	0.92	0.87	0.67	108.17	100	5.63	6.24	0	0	0	0	0	0	1	0	0	0	0	0	0	0	0	154	669	368	0.69	0.09	0.94	1.11
hSQ043750	NM_001037738	NPM1	4869	0.96	5.49	39.34	-0.96	-0.01	-0.43	92.38	100	4.13	3.84	-2.23	14.69	26.19	1	0.94	-0.35	108.64	100	12.91	11.93	0	0	0	0	0	0	0	0	0	0	0	0	0	0	0	320	780	155	0.95	-0.29	0.94	0.92
hSQ006474	NM_024612	DHX40	79665	0.96	5.49	39.35	2.01	2.73	0.19	90.93	100	1.2	1.31	-2.37	14.69	24.46	0.95	0.9	-0.58	108.64	100	7.37	7.09	1	0	0	0	0	1	1	1	0	0	0	0	0	0	0	1169	2340	147	0.71	0.11	0.94	0.96
hSQ044428	NM_001390	DTNA	1837	0.96	5.49	39.4	-0.46	0.2	-0.26	92.38	100	2.88	2.75	0.06	29.81	60.35	0.85	0.85	-0.81	108.64	100	5.96	5.51	2	1	0	1	0	0	0	0	0	0	0	0	0	0	0	3667	2232	247	0.66	-0.13	1	0.92
hSQ025009	NM_014709	USP34	9736	0.96	5.49	39.41	-1.98	-1.19	0.19	90.93	100	-1.16	-1.05	-2.25	14.69	25.93	0.94	0.91	-0.07	108.64	100	5.74	5.69	0	0	0	0	0	5	3	1	0	0	NA	NA	NA	NA	NA	646	10641	NA	0.79	0.12	0.96	0.99
hSQ026618	NM_001081461	JMJD6	23210	0.96	5.49	39.55	1.06	1.97	0.58	84.11	88.84	1.54	1.86	-1.45	14.69	38.29	0.91	0.84	-0.18	108.64	100	5.21	5.09	1	1	0	1	0	1	2	0	1	0	0	0	0	0	0	3854	1245	324	0.91	0.31	0.93	0.98
hSQ027329	NM_001098817	C18orf37	125476	0.95	5.49	39.66	-1.04	-0.37	-3.05	1.97	0.69	2.85	1.31	-3.24	9.63	17.59	0.95	0.84	-1.43	51.15	88.1	5.9	5.11	1	1	1	0	0	2	2	1	0	0	0	0	0	0	0	284	687	117	0.68	-1.54	0.89	0.87
hSQ035246	NM_007370	RFC5	5985	0.95	5.49	39.69	-1.96	-1.3	0.11	90.93	100	2.21	2.26	-1.45	14.69	38.28	0.93	0.88	0.25	108.17	100	6.46	6.66	0	0	0	0	0	2	0	0	0	0	0	0	0	0	0	955	1023	123	0.65	0.05	0.95	1.03
hSQ041376	NM_206824	VKORC1	79001	0.95	5.49	39.71	-1.39	-0.66	-0.54	92.38	100	1.21	0.94	-2.32	14.69	25.12	0.96	0.9	0.29	108.17	100	4.35	4.51	0	1	0	0	0	0	0	0	0	0	0	0	0	0	0	382	279	226	0.73	-0.26	0.94	1.04
hSQ035983	NM_007235	XPOT	11260	0.95	5.49	39.76	-0.9	-0.05	-1.04	35.24	91.07	0.53	-0.24	0.69	29.81	59.97	0.87	0.9	-0.24	108.64	100	5.77	5.46	0	1	0	0	0	1	1	1	0	0	0	0	0	0	0	550	2889	426	0.85	-0.78	1.04	0.95
hSQ017004	NM_032102	SFRS2B	10929	0.95	5.49	39.8	-1.73	-1.09	-0.16	92.38	100	1.8	1.73	-0.89	19.17	48.34	0.88	0.85	-0.61	108.64	100	6.08	5.64	1	0	0	0	0	0	0	0	0	0	0	0	0	0	0	3149	848	335	0.64	-0.07	0.96	0.93
hSQ023025	NM_000235	LIPA	3988	0.95	5.49	39.85	-0.4	0.24	-0.35	92.38	100	1.29	1.11	-1.31	14.69	40.68	0.95	0.91	-2.22	34.95	47.21	9.14	8.17	1	0	0	1	0	1	1	1	1	1	0	0	0	0	0	1253	1200	168	0.64	-0.19	0.96	0.89
hSQ035971	NM_015163	TRIM9	114088	0.95	5.49	39.85	1.94	2.84	-0.47	92.38	100	1.95	1.69	5.74	4.26	3.83	0.77	0.87	-0.1	108.64	100	6.21	6.15	1	1	0	0	0	1	0	0	0	0	0	0	0	0	0	2026	2133	390	0.9	-0.26	1.12	0.99
hSQ033246	NM_021019	MYL6	4637	0.95	5.49	39.86	-0.79	-0.11	0.06	90.93	100	1.1	1.14	-2.94	14.69	19.29	0.98	0.93	-0.2	108.64	100	6.48	6.24	1	1	1	0	0	0	0	0	0	0	0	0	0	0	0	212	456	86	0.68	0.04	0.95	0.96
hSQ010958	NM_152484	ZNF569	148266	0.95	5.49	39.91	0.85	1.76	0.23	90.93	100	0.25	0.36	2.85	9.63	25.63	0.75	0.82	-0.5	108.64	100	5.62	5.33	1	0	0	0	0	1	0	0	1	0	0	0	0	0	0	1437	2061	558	0.91	0.11	1.09	0.95
hSQ021852	NM_021814	ELOVL5	60481	0.95	5.49	39.96	0.86	1.63	-0.56	92.38	100	0.36	0.1	0.64	29.81	60.25	0.78	0.81	-0.6	108.64	100	7.3	6.84	2	1	0	2	0	0	0	0	0	0	0	0	0	0	0	1729	900	336	0.77	-0.26	1.04	0.94
hSQ008517	NM_152284	CHMP4C	92421	0.95	5.49	39.97	-0.96	-0.28	-0.66	90.93	100	-0.05	-0.39	1.02	27.27	56.91	0.84	0.86	-0.01	108.64	100	4.27	4.26	0	0	0	0	0	1	1	1	0	0	1	0	0	0	0	967	702	174	0.67	-0.34	1.03	1
hSQ008902	NM_015540	RPAP1	26015	0.95	5.49	40.01	-1.04	-0.43	-0.31	92.38	100	-0.45	-0.61	-0.78	19.17	50.31	0.92	0.89	-1.71	37.98	72.34	7.78	6.94	1	0	0	0	0	0	1	0	0	0	0	0	0	0	0	364	4182	124	0.61	-0.16	0.97	0.89
hSQ039025	NM_022085	TXNDC5	81567	0.95	5.49	40.05	-1.86	-1.21	-0.51	92.38	100	1.01	0.67	-0.14	21.69	58.92	0.74	0.73	0.49	108.17	100	3.35	3.69	1	1	0	1	0	0	0	0	0	0	0	0	0	0	0	1623	1170	238	0.65	-0.33	0.98	1.1
hSQ005337	NM_032175	UTP15	84135	0.95	5.49	40.13	0.69	1.58	-0.18	92.38	100	0.98	0.91	-0.43	21.69	55.58	0.87	0.86	-0.21	108.64	100	7.82	7.71	1	1	1	0	0	0	0	0	0	0	0	0	0	0	0	1875	1557	223	0.88	-0.07	0.99	0.99
hSQ021467	NM_017741	C4orf30	54876	0.95	5.49	40.14	-1.74	-1.13	-0.28	92.38	100	1.11	0.98	-0.32	21.69	57	0.83	0.8	-0.74	108.64	100	5.62	4.86	3	4	1	0	0	1	1	1	0	0	0	0	0	0	0	2834	651	1061	0.6	-0.13	0.96	0.87
hSQ005035	NM_006494	ERF	2077	0.95	5.49	40.14	-0.2	0.97	-0.95	52.46	96.75	0.03	-0.52	-0.09	21.69	59.3	0.73	0.73	0.4	108.17	100	4.94	5.18	1	2	0	1	0	2	1	1	0	0	0	0	0	0	0	900	1647	158	1.17	-0.55	0.99	1.05
hSQ037831	NM_006305	ANP32A	8125	0.95	5.49	40.15	-1.54	-0.92	-0.54	92.38	100	2.47	1.98	-0.14	21.69	58.85	0.92	0.9	0.27	108.17	100	6.65	7.01	0	0	0	0	0	0	0	0	0	0	0	0	0	0	0	214	750	133	0.62	-0.49	0.99	1.06
hSQ032836	NM_002305	LGALS1	3956	0.95	5.49	40.19	-1.45	-0.82	0.88	65.69	76.16	-1.01	-0.57	-0.65	21.69	52.45	0.92	0.9	0.22	108.17	100	4.7	4.87	0	0	0	0	0	1	2	1	0	0	0	0	0	0	0	51	408	97	0.63	0.43	0.98	1.04
hSQ036711	NM_003133	SRP9	6726	0.95	5.49	40.26	-0.07	1.23	-0.9	52.46	99.94	3.72	3.1	-0.88	19.17	48.56	0.97	0.94	0.09	108.17	100	4.87	4.97	1	0	0	1	0	0	0	0	0	0	0	0	0	0	0	1103	261	112	1.3	-0.62	0.97	1.02
hSQ035296	NM_002048	GAS1	2619	0.95	5.49	40.29	0.45	1.47	0	92.38	100	2.49	2.49	0.18	29.81	60.82	0.88	0.89	-0.39	108.64	100	5.11	4.77	2	0	0	2	0	0	2	0	0	0	0	0	0	0	0	1378	1038	410	1.02	0	1.01	0.93
hSQ018181	NM_004583	RAB5C	5878	0.94	5.49	40.31	0.83	1.43	0.63	84.11	86.68	1.11	1.43	-1.04	14.69	45.72	0.91	0.88	0.18	108.17	100	6.43	6.57	0	0	0	0	0	0	0	0	0	0	0	1	0	0	0	803	651	200	0.6	0.32	0.97	1.02
hSQ020643	NM_003016	SFRS2	6427	0.94	5.49	40.35	-1.85	-1.24	-0.37	92.38	100	1.29	1.07	0.76	29.81	59.51	0.36	0.43	0.07	108.17	100	3.31	3.35	2	1	0	0	0	0	0	0	0	0	0	0	0	0	0	2046	666	170	0.61	-0.22	1.19	1.01
hSQ036025	NM_005926	MFAP1	4236	0.94	5.49	40.35	-0.9	-0.17	0.28	84.11	100	1.12	1.23	-1.29	14.69	41.02	0.96	0.92	-1.19	71.06	99.89	9.76	8.95	0	0	0	0	0	1	1	1	0	0	0	0	0	0	0	557	1320	184	0.73	0.11	0.96	0.92
hSQ020004	NA	EIF4A1::Y11161	1973::26781	0.94	5.49	40.44	-1.43	-0.69	-0.2	92.38	100	2.39	2.29	-1.98	14.69	29.5	0.41	0.33	0.49	108.17	100	3.73	4	NA	NA	NA	NA	NA	NA	NA	NA	NA	NA	NA	NA	NA	NA	NA	NA	NA	NA	0.74	-0.1	0.8	1.07
hSQ043920	NM_001002259	CAPRIN2	65981	0.94	5.49	40.46	-0.14	0.61	0.5	84.11	92.43	-1.39	-1.15	-0.6	21.69	53.21	0.84	0.8	-0.86	108.64	100	3.48	3.08	1	1	0	0	0	4	1	0	1	0	1	1	0	0	0	350	3384	751	0.75	0.25	0.95	0.88
hSQ030398	NM_014777	KIAA0133	9816	0.94	5.49	40.46	-0.18	0.56	-0.03	92.38	100	2.79	2.77	-1.12	14.69	44.2	0.93	0.91	0.29	108.17	100	7.94	8.17	2	0	0	0	0	3	2	1	1	0	0	0	0	0	0	902	4575	136	0.73	-0.02	0.97	1.03
hSQ022604	NM_004711	SYNGR1	9145	0.94	5.49	40.52	0.18	1	-0.09	92.38	100	1.62	1.54	-0.08	21.69	59.39	0.92	0.92	0.89	108.17	100	3.62	4.1	2	1	0	0	0	1	0	0	1	0	0	0	0	0	0	3674	702	62	0.82	-0.08	1	1.13
hSQ023558	NM_024685	BBS10	79738	0.94	5.49	40.64	-1.34	-0.69	0.23	90.93	100	0.64	0.75	1.12	26.68	55.75	0.4	0.55	-0.41	108.64	100	6.42	6.11	0	0	0	0	0	0	0	0	0	0	0	0	0	0	0	1327	2172	84	0.65	0.11	1.36	0.95
hSQ021473	NM_024116	JOSD3	79101	0.94	5.49	40.66	-2.38	-1.68	-0.14	92.38	100	1.61	1.54	-0.26	21.69	57.71	0.08	0.07	0.83	108.17	100	2.86	3.3	0	0	0	0	0	0	0	0	0	0	0	0	0	0	0	227	837	202	0.7	-0.07	0.87	1.15
hSQ020986	NM_018301	RBM41	55285	0.94	5.49	40.69	-1.88	-1.22	-0.15	92.38	100	1.68	1.6	2.92	9.63	24.61	0.57	0.74	1.04	108.17	100	4.64	5.14	0	0	0	0	0	0	0	0	0	0	NA	NA	NA	NA	NA	386	1242	NA	0.66	-0.08	1.29	1.11
hSQ015713	NM_014517	UBP1	7342	0.94	5.49	40.71	-0.02	0.67	0.08	90.93	100	0.47	0.51	-0.41	21.69	55.81	0.91	0.89	0.05	108.17	100	3.95	3.99	1	1	0	0	0	0	0	0	0	0	0	0	0	0	0	1992	1623	530	0.69	0.04	0.98	1.01
hSQ021155	NM_003901	SGPL1	8879	0.94	5.49	40.75	3.3	4.31	-2.16	4.63	16.64	0.56	-0.41	-1.94	14.69	30.16	0.87	0.82	-0.87	108.64	100	5.61	4.97	3	3	1	0	0	1	0	0	0	0	0	0	0	0	0	2773	1707	210	1.01	-0.97	0.95	0.89
hSQ002118	NM_001034191	PPA2	27068	0.94	5.49	40.77	-1.15	-0.48	-0.47	92.38	100	2.08	1.81	-1.94	14.69	30.18	0.98	0.93	0.71	108.17	100	4.69	5.19	0	0	0	0	0	0	1	0	0	0	NA	NA	NA	NA	NA	647	951	NA	0.67	-0.27	0.95	1.11
hSQ023746	NM_004052	BNIP3	664	0.94	5.49	40.85	-1.76	-1.14	-0.09	92.38	100	0.08	0.03	-0.43	21.69	55.6	0.84	0.81	0.84	108.17	100	4.76	5.27	0	0	0	0	0	0	0	0	0	0	0	0	0	0	0	824	585	125	0.62	-0.05	0.96	1.11
hSQ020254	NM_017414	USP18	11274	0.94	5.49	40.88	0.91	1.64	0.26	90.93	100	3.05	3.17	-0.78	19.17	50.19	0.95	0.93	0.62	108.17	100	5.47	5.8	0	0	0	0	0	1	0	0	1	0	0	1	0	0	0	578	1119	338	0.73	0.12	0.98	1.06
hSQ022092	NA	repname(hSQ022092)	repname(hSQ022092)	0.94	5.49	40.95	-1.22	-0.53	0.04	90.93	100	1.29	1.31	-1.53	14.69	36.75	0.96	0.92	0.32	108.17	100	6.95	7.27	NA	NA	NA	NA	NA	NA	NA	NA	NA	NA	NA	NA	NA	NA	NA	NA	NA	NA	0.7	0.01	0.96	1.05
hSQ016752	NM_003372	VBP1	7411	0.93	5.49	40.99	-2.71	-1.96	-0.2	92.38	100	2.92	2.84	-2.29	14.69	25.37	0.98	0.93	0.29	108.17	100	4.64	4.85	1	0	0	0	0	0	0	0	0	0	0	0	0	0	0	973	594	210	0.75	-0.08	0.95	1.05
hSQ002704	NM_004423	DVL3	1857	0.93	5.49	41.01	-0.78	-0.04	0.27	90.93	100	-0.95	-0.81	-1.66	14.69	34.51	0.94	0.88	-0.6	108.64	100	4.97	4.72	1	2	0	0	0	0	1	0	0	0	0	0	0	0	0	2770	2151	140	0.74	0.14	0.93	0.95
hSQ016395	NM_001014436	DBNL	28988	0.93	5.49	41.02	-0.01	0.61	-0.33	92.38	100	0.09	-0.06	-1.1	14.69	44.49	0.94	0.91	-0.09	108.64	100	6.53	6.48	2	1	0	0	0	0	0	0	0	0	NA	NA	NA	NA	NA	798	1293	NA	0.62	-0.15	0.96	0.99
hSQ001813	NM_024612	DHX40	79665	0.93	5.49	41.08	0.02	0.66	0.08	90.93	100	1.11	1.15	-1.95	14.69	30.05	0.97	0.93	-0.57	108.64	100	6.74	6.45	1	0	0	0	0	1	1	1	0	0	0	0	0	0	0	1169	2340	147	0.64	0.04	0.95	0.96
hSQ035881	NM_001098491	ZNF419	79744	0.93	5.49	41.12	-0.73	-0.03	0.68	74.83	84.77	-0.49	-0.14	3.14	8.94	21.18	0.58	0.75	-0.53	108.64	100	4.37	4.08	1	0	0	0	0	0	0	0	0	0	0	0	0	0	0	590	1536	240	0.7	0.35	1.3	0.93
hSQ031371	NM_019008	SMCR7L	54471	0.93	5.49	41.21	0.23	0.87	-0.54	92.38	100	1.77	1.52	-1.59	14.69	35.79	0.94	0.88	-0.49	108.64	100	5.74	5.5	5	1	0	0	0	0	1	0	0	0	1	1	1	0	0	3808	1392	498	0.64	-0.25	0.94	0.96
hSQ011835	NM_014455	ZNF364	27246	0.93	5.49	41.32	-1.7	-1.01	0.42	84.11	95.55	0.56	0.77	0.44	29.81	60.98	0.88	0.9	0.24	108.17	100	4.67	4.76	1	0	0	0	0	0	0	0	0	0	0	0	0	0	0	506	915	204	0.69	0.21	1.02	1.02
hSQ020195	NM_152540	SCFD2	152579	0.93	5.49	41.32	-2.55	-1.37	-1.25	25.69	75.07	0.62	0.03	-0.76	19.17	50.6	0.9	0.87	-2.56	28.06	37	9.51	8.14	0	0	0	0	0	1	0	0	0	0	0	0	0	0	0	984	2055	134	1.18	-0.59	0.97	0.86
hSQ040717	NM_001017998	GNG10	2790	0.93	5.49	41.48	-2.16	-1.5	-2.41	2.6	8.68	1.68	0.59	-0.05	21.69	59.59	0.81	0.8	0.13	108.17	100	2.72	2.79	3	1	1	0	0	0	0	0	0	0	0	0	0	0	0	982	207	54	0.65	-1.1	0.99	1.02
hSQ018913	NA	LOC124685	124685	0.93	5.49	41.48	-1.01	-0.38	0.04	90.93	100	0.4	0.42	-1.63	14.69	35.1	0.94	0.9	0.49	108.17	100	4.75	5.26	NA	NA	NA	NA	NA	NA	NA	NA	NA	NA	NA	NA	NA	NA	NA	NA	NA	NA	0.62	0.02	0.96	1.11
hSQ044327	NM_024551	ADIPOR2	79602	0.93	5.49	41.51	1.65	2.52	-0.39	92.38	100	0.52	0.31	-1.54	14.69	36.72	0.93	0.88	-0.13	108.64	100	5.25	5.17	2	1	0	1	0	2	1	0	0	0	0	0	0	0	0	2606	1161	197	0.87	-0.22	0.95	0.98
hSQ004011	NM_001080510	LOC124512	124512	0.93	5.49	41.54	-1.73	-1.03	-0.44	92.38	100	1.35	1.18	-1.7	14.69	33.9	0.92	0.86	0.12	108.17	100	4.27	4.34	1	0	0	1	0	0	0	0	0	0	0	0	0	0	0	194	573	332	0.7	-0.17	0.93	1.02
hSQ021850	NM_001010935	RAP1A	5906	0.93	5.49	41.55	-0.26	0.52	-0.31	92.38	100	0.86	0.7	0.81	29.5	59.08	0.82	0.85	0.65	108.17	100	3.93	4.4	0	0	0	0	0	1	1	1	0	0	0	0	0	0	0	1077	555	273	0.78	-0.16	1.04	1.12
hSQ000642	NM_007125	UTY	7404	0.93	5.49	41.63	-1.76	-1.15	0.16	90.93	100	-0.22	-0.12	0.33	29.81	61.07	0.87	0.89	0.1	108.17	100	4.84	4.91	0	1	0	0	0	4	2	1	1	1	2	0	0	0	0	1473	4044	1005	0.62	0.1	1.02	1.01
hSQ043961	NM_003425	ZNF45	7596	0.92	5.49	41.68	-3.35	-1.09	0.11	90.93	100	-0.09	-0.02	-0.39	21.69	56.17	0.88	0.87	-0.23	108.64	100	4.54	4.39	1	1	0	0	0	1	0	0	0	0	0	0	0	0	0	758	2049	347	2.26	0.07	0.98	0.97
hSQ002697	NM_012405	ICMT	23463	0.92	5.49	41.69	2.02	2.72	-1.08	35.24	88.13	2.44	1.92	0.15	29.81	60.74	0.92	0.93	-0.21	108.64	100	3.56	3.44	1	3	0	1	0	1	0	0	0	0	0	0	0	0	0	3885	855	73	0.7	-0.52	1.01	0.97
hSQ009744	NM_025133	FBXO11	80204	0.92	5.49	41.79	-0.34	0.37	-0.55	92.38	100	-0.17	-0.39	-0.82	19.17	49.51	0.92	0.89	-0.86	108.64	100	7.23	6.59	1	0	0	0	0	0	0	0	0	0	0	1	0	0	0	1196	2532	207	0.71	-0.21	0.96	0.91
hSQ029126	NM_000159	GCDH	2639	0.92	5.49	41.88	-1.22	-0.57	-0.73	74.83	100	0.7	0.44	-0.51	21.69	54.52	0.88	0.86	0.12	108.17	100	6.68	6.77	1	1	1	1	1	0	0	0	0	0	0	0	0	0	0	427	1317	77	0.65	-0.26	0.98	1.01
hSQ007645	NM_001035521	GTF3C2	2976	0.92	5.49	42.26	0.32	1.01	-0.09	92.38	100	1.1	1.06	-0.18	21.69	58.55	0.91	0.9	0.42	108.17	100	6.17	6.36	1	0	0	0	0	1	2	1	1	1	0	0	0	0	0	819	2736	287	0.69	-0.04	1	1.03
hSQ044365	NM_003934	FUBP3	8939	0.92	5.49	42.27	-1.66	-0.82	0.61	84.11	87.87	-1.99	-1.76	1.68	22.99	46.94	0.56	0.72	0.09	108.17	100	2.7	2.74	0	1	0	0	0	0	2	0	0	0	0	0	0	0	0	1333	1719	108	0.84	0.23	1.29	1.01
hSQ036209	NM_004499	HNRNPAB	3182	0.92	5.49	42.27	-1.84	-1.1	0.48	84.11	93.06	2.77	2.99	-2.18	14.69	26.8	0.99	0.94	-0.69	108.64	100	7.77	7.22	0	0	0	0	0	0	0	0	0	0	0	0	0	0	0	559	858	257	0.74	0.21	0.94	0.93
hSQ018598	NM_022488	ATG3	64422	0.91	5.49	42.37	-1.4	-0.75	-0.03	92.38	100	1.75	1.73	-3.08	9.63	18.41	0.97	0.91	0.31	108.17	100	5.81	6.06	0	0	0	0	0	0	0	0	0	0	0	0	0	0	0	186	945	110	0.65	-0.01	0.94	1.04
hSQ021583	NM_004938	DAPK1	1612	0.91	5.49	42.44	1.54	2.17	-1.07	35.24	88.68	-0.53	-1.05	-1.07	14.69	45.05	0.95	0.91	-0.46	108.64	100	5.54	5.29	1	1	1	0	0	2	1	1	0	0	0	0	0	0	0	1269	4293	375	0.64	-0.52	0.96	0.96
hSQ023848	NM_015446	AHCTF1	25909	0.91	5.49	42.47	0.14	1.31	0.3	84.11	100	-1.35	-1.12	0.75	29.81	59.52	0.85	0.92	0.12	108.17	100	5.93	6.1	1	1	0	0	0	1	2	0	0	0	NA	NA	NA	NA	NA	1704	6801	NA	1.18	0.23	1.07	1.03
hSQ017565	NM_016631	C21orf66	94104	0.91	5.49	42.48	-1.23	-0.58	0.12	90.93	100	0.89	0.96	-2.02	14.69	29.01	0.95	0.87	0.07	108.17	100	4.72	4.76	1	0	0	1	0	1	0	0	1	0	0	0	0	0	0	1051	2754	190	0.64	0.07	0.92	1.01
hSQ019801	NM_005773	ZNF256	10172	0.91	5.49	42.56	1.32	1.99	0.41	84.11	96.09	-1.35	-1.09	3.32	8.9	18.69	0.18	0.46	-0.2	108.64	100	4.63	4.46	0	0	0	0	0	0	0	0	0	0	0	0	0	0	0	89	1884	235	0.67	0.26	2.5	0.96
hSQ017215	NM_003406	YWHAZ	7534	0.91	5.49	42.56	-0.33	0.26	0	92.38	100	1.17	1.17	-1.32	14.69	40.64	0.97	0.94	-0.08	108.64	100	9.6	9.52	2	1	0	0	0	0	0	0	0	0	0	0	0	0	0	2007	738	84	0.59	0	0.97	0.99
hSQ031702	NM_003270	TSPAN6	7105	0.91	5.49	42.57	-1.18	-0.6	-0.06	92.38	100	2.41	2.37	-0.42	21.69	55.75	0.89	0.87	-0.35	108.64	100	6.18	5.95	1	1	1	0	0	0	0	0	0	0	0	0	0	0	0	1228	738	103	0.58	-0.04	0.98	0.96
hSQ029655	NM_001012750	ABI1	10006	0.91	5.49	42.6	-0.68	-0.09	-0.04	92.38	100	-0.56	-0.58	1.49	23.79	50.21	0.82	0.86	-0.24	108.64	100	5.93	5.83	1	0	0	0	0	0	1	0	0	0	0	0	0	0	0	1972	1446	167	0.59	-0.02	1.06	0.98
hSQ008157	NM_002532	NUP88	4927	0.91	5.49	42.61	0.88	1.68	-0.03	92.38	100	2.03	2.01	-1.74	14.69	33.25	0.97	0.93	0.46	108.17	100	8.97	9.4	0	0	0	0	0	2	1	0	0	0	NA	NA	NA	NA	NA	106	2226	NA	0.79	-0.02	0.96	1.05
hSQ038677	NM_001042368	RALGDS	5900	0.91	5.49	42.63	2.54	3.66	-0.15	92.38	100	0.41	0.33	1.74	22.31	45.85	0.67	0.79	-0.02	108.64	100	3.64	3.63	2	1	1	1	0	0	0	0	0	0	0	0	0	0	0	866	2580	221	1.11	-0.07	1.19	1
hSQ013698	NM_007054	KIF3A	11127	0.91	5.49	42.72	-2.06	-1.24	0.2	90.93	100	1.25	1.37	-0.13	21.69	58.99	0.95	0.94	-0.49	108.64	100	7.91	7	2	1	1	0	0	2	1	1	1	1	0	0	0	0	0	4001	2100	154	0.81	0.12	0.99	0.88
hSQ016469	NM_005787	ALG3	10195	0.91	5.49	42.72	-1.84	-1.29	0.05	90.93	100	0.43	0.46	-1.28	14.69	41.33	0.89	0.83	0.39	108.17	100	4.72	4.99	0	0	0	0	0	0	0	0	0	0	NA	NA	NA	NA	NA	185	1317	NA	0.54	0.03	0.94	1.06
hSQ045213	NM_001024948	FNBP1L	54874	0.91	5.49	42.76	2.33	3.13	-0.03	92.38	100	-0.63	-0.64	1.12	26.68	55.7	0.78	0.85	0.68	108.17	100	5.6	5.97	4	1	0	2	0	0	0	0	0	0	NA	NA	NA	NA	NA	3534	1656	NA	0.8	-0.01	1.09	1.07
hSQ003167	NM_004048	B2M	567	0.91	5.49	42.77	-1.45	-0.72	-0.54	92.38	100	-0.47	-0.83	-1.97	14.69	29.68	1	0.95	0.37	108.17	100	5.36	5.75	0	0	0	0	0	0	0	0	0	0	0	0	0	0	0	566	360	60	0.73	-0.36	0.95	1.07
hSQ014917	NA	LOC343515	343515	0.91	5.49	42.78	-1.14	-0.5	0.73	74.83	82.5	1.72	2.03	-2.23	14.69	26.2	0.97	0.92	-0.21	108.64	100	6.92	6.77	NA	NA	NA	NA	NA	NA	NA	NA	NA	NA	NA	NA	NA	NA	NA	NA	NA	NA	0.64	0.31	0.94	0.98
hSQ016119	NM_006527	SLBP	7884	0.91	5.49	42.82	-1.95	-1.31	-0.9	58.83	100	1.27	0.92	-2.34	14.69	24.81	0.97	0.91	0.51	108.17	100	5.89	6.34	1	0	0	1	0	0	0	0	0	0	0	0	0	0	0	797	813	115	0.64	-0.35	0.94	1.08
hSQ017289	NM_004593	SFRS10	6434	0.91	5.49	42.86	-1.82	-1.11	0.36	84.11	98.06	2.2	2.35	-1.68	14.69	34.28	0.94	0.89	-0.23	108.64	100	7.58	7.45	1	1	0	1	0	1	0	0	0	0	0	0	0	0	0	961	867	108	0.71	0.15	0.95	0.98
hSQ016151	NA	ND1	4535	0.91	5.49	42.93	-1.36	-0.78	0.03	90.93	100	1	1.03	0.11	29.81	60.59	0.25	0.25	0.07	108.17	100	3.23	3.29	NA	NA	NA	NA	NA	NA	NA	NA	NA	NA	NA	NA	NA	NA	NA	NA	NA	NA	0.58	0.02	1.03	1.02
hSQ040426	NM_001007277	EI24	9538	0.91	5.49	42.94	-1.22	-0.66	-0.23	92.38	100	2.01	1.91	-0.32	21.69	56.99	0.78	0.75	-0.07	108.64	100	4.05	3.99	1	1	0	0	0	1	0	0	0	0	0	0	0	0	0	1118	788	242	0.56	-0.1	0.96	0.99
hSQ006953	NM_181491	MED22	6837	0.91	5.49	42.96	2.48	3.24	0.05	90.93	100	1.58	1.61	-2.12	14.69	27.53	0.92	0.87	-0.34	108.64	100	5.27	5.07	5	2	1	0	0	0	0	0	0	0	0	0	0	0	0	3214	423	234	0.77	0.03	0.95	0.96
hSQ045081	NM_006110	CD2BP2	10421	0.9	5.49	43.01	-1.22	-0.61	0.24	90.93	100	2.24	2.37	-2.64	14.69	21.7	0.96	0.9	0.2	108.17	100	6.16	6.34	0	0	0	0	0	0	0	0	0	0	0	0	0	0	0	137	1026	121	0.61	0.13	0.93	1.03
hSQ010039	NM_001025778	VRK3	51231	0.9	5.49	43.02	-0.72	-0.1	0.46	84.11	93.82	1.37	1.64	-1.07	14.69	45.05	0.91	0.88	-0.47	108.64	100	5.36	5.05	0	0	0	0	0	1	0	0	0	0	0	0	0	0	0	329	1275	346	0.61	0.27	0.96	0.94
hSQ033329	NM_014754	PTDSS1	9791	0.9	5.49	43.03	1.54	2.41	-0.29	92.38	100	2.77	2.54	-1.57	14.69	36.14	0.96	0.92	0.42	108.17	100	5.94	6.26	1	2	1	0	0	0	0	0	0	0	0	0	0	0	0	980	1422	102	0.88	-0.23	0.96	1.06
hSQ032533	NM_003133	SRP9	6726	0.9	5.49	43.08	0.15	1.3	-0.96	43.3	96.32	3.78	3.31	-1.25	14.69	41.87	0.98	0.95	-0.04	108.64	100	4.98	4.94	1	0	0	1	0	0	0	0	0	0	0	0	0	0	0	1103	261	112	1.16	-0.47	0.96	0.99
hSQ003887	NM_018233	OGFOD1	55239	0.9	5.49	43.19	0.36	1.02	-0.28	92.38	100	1.18	1.08	-0.78	19.17	50.3	0.91	0.89	-0.52	108.64	100	7.75	7.47	1	0	0	0	0	1	0	0	0	0	1	1	1	0	0	1289	1629	101	0.66	-0.11	0.98	0.96
hSQ043000	NM_005746	NAMPT	10135	0.9	5.49	43.23	-2.17	-1.55	0.08	90.93	100	-0.25	-0.21	-0.41	21.69	55.91	0.9	0.88	-0.6	108.64	100	7.62	7.21	2	1	1	0	0	1	1	0	0	0	0	0	0	0	0	2797	1476	308	0.63	0.03	0.98	0.95
hSQ022602	NM_152902	TIPRL	261726	0.9	5.49	43.25	-2.23	-1.27	-0.45	92.38	100	1.27	1	-0.55	21.69	53.85	0.93	0.9	0.21	108.17	100	5.19	5.34	6	0	0	0	0	1	0	0	0	0	0	0	0	0	0	2065	819	145	0.95	-0.27	0.97	1.03
hSQ002149	NM_017425	SPA17	53340	0.9	5.49	43.28	-1.25	-0.42	0.11	90.93	100	1.19	1.25	-0.61	21.69	53.04	0.92	0.9	-0.42	108.64	100	5.2	4.85	0	0	0	0	0	1	0	0	0	0	0	0	0	0	0	343	456	136	0.83	0.06	0.98	0.93
hSQ032981	NM_006802	SF3A3	10946	0.9	5.49	43.32	-0.39	0.25	0.23	90.93	100	1.72	1.81	-1.1	14.69	44.51	0.93	0.91	-0.49	108.64	100	9.04	8.67	2	1	0	1	0	0	0	0	0	0	0	0	0	0	0	1204	1506	124	0.64	0.1	0.97	0.96
hSQ031714	NM_001077351	RBM23	55147	0.9	5.49	43.35	-0.72	0.01	-0.13	92.38	100	1.8	1.75	-2.01	14.69	29.12	0.96	0.9	-0.45	108.64	100	7.35	7.05	1	2	0	0	0	1	1	0	0	0	0	0	0	0	0	1084	1320	199	0.73	-0.05	0.93	0.96
hSQ042034	NA	LOC440701	440701	0.9	5.49	43.43	-0.39	0.26	-0.12	92.38	100	1.26	1.2	-1.25	14.69	41.83	0.92	0.88	-1.3	59.85	94.53	6.5	5.92	NA	NA	NA	NA	NA	NA	NA	NA	NA	NA	NA	NA	NA	NA	NA	NA	NA	NA	0.65	-0.06	0.96	0.91
hSQ028766	NM_003370	VASP	7408	0.9	5.49	43.51	-1.36	-0.7	0.47	84.11	93.69	-1.29	-1.06	-0.04	21.69	59.72	0.88	0.88	-0.37	108.64	100	5.79	5.55	1	0	0	0	0	0	0	0	0	0	0	0	0	0	0	803	1143	342	0.66	0.23	1	0.96
hSQ044823	NM_032927	TMEM128	85013	0.9	5.49	43.52	-0.75	-0.17	-1.63	9.09	45.88	1.09	0.4	-2.06	14.69	28.42	0.94	0.87	0.27	108.17	100	4.11	4.22	1	2	1	0	0	1	1	1	0	0	1	0	0	0	0	724	426	582	0.58	-0.69	0.92	1.03
hSQ015390	NM_015171	XPO6	23214	0.9	5.49	43.53	0.6	1.2	-0.35	92.38	100	0.54	0.4	-1.67	14.69	34.34	0.93	0.87	-0.47	108.64	100	5.83	5.65	1	0	0	0	0	1	3	1	0	0	0	0	0	0	0	543	3378	501	0.6	-0.15	0.94	0.97
hSQ044399	NM_004566	PFKFB3	5209	0.9	5.49	43.55	0.82	1.66	0.59	84.11	88.46	-0.89	-0.57	-1.2	14.69	42.73	0.93	0.88	-0.53	108.64	100	5.14	4.81	6	2	1	0	0	2	1	1	1	1	0	0	0	0	0	2587	1563	329	0.84	0.32	0.95	0.93
hSQ042369	NM_152595	PGBD4	161779	0.9	5.49	43.57	-0.2	0.44	0	92.38	100	1.37	1.36	2.07	21.91	39.78	0.38	0.55	-0.06	108.64	100	5.52	5.47	0	0	0	0	0	1	1	0	0	0	0	2	0	0	0	101	1758	459	0.64	0	1.45	0.99
hSQ025408	NM_001219	CALU	813	0.9	5.49	43.59	-1.61	-0.96	-1.07	35.24	88.67	-0.39	-0.95	-2.04	14.69	28.74	0.94	0.87	0.11	108.17	100	6.68	6.77	3	1	1	0	0	2	1	0	0	0	0	0	0	0	0	2306	948	62	0.65	-0.55	0.93	1.01
hSQ006786	NM_138493	C6orf129	154467	0.9	5.49	43.61	-1.01	-0.37	0.05	90.93	100	2.61	2.64	-1.09	14.69	44.74	0.95	0.91	0.4	108.17	100	3.81	4.11	0	0	0	0	0	0	0	0	0	0	0	0	0	0	0	263	294	61	0.65	0.03	0.96	1.08
hSQ003477	NM_017693	BIVM	54841	0.9	5.49	43.62	-1.6	-0.89	-0.14	92.38	100	-0.61	-0.66	-1.33	14.69	40.42	0.91	0.86	-0.24	108.64	100	4.09	3.95	1	0	0	1	0	1	1	0	0	0	0	0	0	0	0	1666	1512	679	0.71	-0.06	0.95	0.97
hSQ006229	NA	LOC442037	442037	0.9	5.49	43.65	-1.51	-0.89	0.47	84.11	93.72	0.91	1.13	2.48	19.17	32.08	0.42	0.59	-0.88	108.64	100	3.85	3.49	NA	NA	NA	NA	NA	NA	NA	NA	NA	NA	NA	NA	NA	NA	NA	NA	NA	NA	0.62	0.22	1.41	0.91
hSQ000335	NM_001031806	ALDH3A2	224	0.89	5.49	43.67	0.7	1.52	-0.13	92.38	100	1.44	1.36	-0.48	21.69	54.95	0.89	0.88	-0.18	108.64	100	6.48	6.31	1	1	0	0	0	0	1	0	0	0	0	0	0	0	0	2074	1527	221	0.82	-0.08	0.99	0.97
hSQ042773	NA	TMEM205	374882	0.89	5.49	43.67	-1.22	-0.46	-0.05	92.38	100	1.47	1.45	-2.17	14.69	26.92	0.96	0.9	0.46	108.17	100	5.05	5.31	NA	NA	NA	NA	NA	NA	NA	NA	NA	NA	NA	NA	NA	NA	NA	NA	NA	NA	0.77	-0.02	0.94	1.05
hSQ020949	NM_002734	PRKAR1A	5573	0.89	5.49	43.74	-0.31	0.42	0.22	90.93	100	-0.29	-0.18	-1.83	14.69	31.79	0.94	0.91	-1.54	44.12	81.97	9.27	7.92	1	1	0	0	0	0	0	0	0	0	0	0	0	0	0	2318	1146	153	0.73	0.11	0.96	0.85
hSQ003103	NM_006590	USP39	10713	0.89	5.49	43.78	-1.6	-0.89	-0.14	92.38	100	1.95	1.9	-2.47	14.69	23.41	0.96	0.9	-0.15	108.64	100	6.82	6.75	0	0	0	0	0	1	0	0	0	0	NA	NA	NA	NA	NA	474	1698	NA	0.72	-0.05	0.94	0.99
hSQ036298	NM_016101	NIP7	51388	0.89	5.49	43.79	-0.45	0.17	-1.2	25.69	78.83	2.07	1.52	-2.86	14.69	19.92	0.93	0.86	-0.43	108.64	100	6.59	6.23	1	2	1	0	0	0	0	0	0	0	0	0	0	0	0	1452	543	187	0.62	-0.55	0.93	0.94
hSQ021907	NM_032590	FBXL10	84678	0.89	5.49	43.79	0.41	1.06	0.04	90.93	100	-0.1	-0.08	-1	14.69	46.37	0.94	0.91	0.13	108.17	100	4.53	4.6	0	0	0	0	0	2	2	1	1	0	0	0	0	0	0	1192	4011	73	0.64	0.02	0.96	1.02
hSQ014960	NM_007152	ZNF195	7748	0.89	5.49	43.8	-0.92	-0.28	-0.64	91.61	100	0.39	0.04	0.53	29.81	60.75	0.82	0.84	0.39	108.17	100	3.56	3.76	0	0	0	0	0	0	0	0	0	0	0	0	0	0	0	349	1674	145	0.63	-0.35	1.03	1.06
hSQ021459	NM_020188	C16orf61	56942	0.89	5.49	43.81	-0.17	0.43	-0.18	92.38	100	1.39	1.3	-0.63	21.69	52.64	0.96	0.93	-0.66	108.64	100	4.43	4.12	1	0	0	0	0	0	0	0	0	0	0	0	0	0	0	289	240	193	0.61	-0.09	0.97	0.93
hSQ016567	NM_006112	PPIE	10450	0.89	5.49	43.85	-1.87	-1.32	0.53	84.11	90.94	1.47	1.67	-3.66	9.63	16.03	0.95	0.88	0.47	108.17	100	5.27	5.64	0	1	0	0	0	0	0	0	0	0	NA	NA	NA	NA	NA	351	906	NA	0.55	0.2	0.92	1.07
hSQ016127	NM_003604	IRS4	8471	0.89	5.49	43.87	-1.93	-0.99	0.73	74.83	82.44	7.74	8.3	-0.75	19.17	50.72	0.93	0.89	-1.05	85.33	100	8.67	7.87	0	0	0	0	0	0	0	0	0	0	0	0	0	0	0	87	3774	65	0.94	0.56	0.97	0.91
hSQ005267	NM_001100876	PHYHD1	254295	0.89	5.49	43.9	-1.6	-0.94	0.24	90.93	100	3.64	3.76	-0.74	19.17	50.88	0.82	0.78	0.24	108.17	100	4.46	4.61	1	1	1	0	0	0	0	0	0	0	0	0	0	0	0	328	876	933	0.66	0.12	0.95	1.03
hSQ012564	NM_002875	RAD51	5888	0.89	5.49	43.92	-0.98	-0.28	-1.73	7.95	39.48	0.58	-0.28	-2.45	14.69	23.57	0.96	0.89	-1.71	37.98	72.42	7.28	6.61	1	2	1	1	1	0	0	0	0	0	0	0	0	0	0	980	1020	267	0.7	-0.86	0.93	0.91
hSQ021754	NM_144580	C1orf85	112770	0.89	5.49	43.95	-0.03	0.58	-0.42	92.38	100	1.49	1.28	-0.67	21.69	52.01	0.86	0.83	-0.26	108.64	100	5.77	5.58	1	1	0	0	0	2	1	1	1	0	NA	NA	NA	NA	NA	350	1221	NA	0.61	-0.21	0.96	0.97
hSQ005683	NM_024683	C17orf42	79736	0.89	5.49	43.95	0.46	1.2	-0.39	92.38	100	2.06	1.88	-0.26	21.69	57.65	0.89	0.88	-0.17	108.64	100	5.91	5.81	0	0	0	0	0	2	0	0	1	0	0	0	0	0	0	186	1083	70	0.74	-0.17	0.99	0.98
hSQ014786	NA	RPL12	6136	0.89	5.49	43.97	-1.95	-1.38	-0.1	92.38	100	1.39	1.32	1.47	23.79	50.5	0.57	0.65	-0.32	108.64	100	2.5	2.32	NA	NA	NA	NA	NA	NA	NA	NA	NA	NA	NA	NA	NA	NA	NA	NA	NA	NA	0.57	-0.07	1.15	0.93
hSQ017455	NM_181844	BCL6B	255877	0.89	5.49	44.07	0.33	1.24	0.63	84.11	86.8	4.45	4.87	0.85	29.12	58.72	0.53	0.6	-0.11	108.64	100	5.88	5.82	0	0	0	0	0	0	0	0	0	0	0	0	0	0	0	2023	1440	62	0.9	0.42	1.13	0.99
hSQ030276	NM_002198	IRF1	3659	0.89	5.49	44.09	0.27	1.27	-0.79	65.69	100	-1.36	-1.84	0.7	29.81	59.89	0.67	0.83	-0.61	108.64	100	5.9	5.45	1	1	1	0	0	0	0	0	0	0	1	0	0	0	0	858	978	196	1	-0.48	1.23	0.92
hSQ030118	NA	LOC400690	400690	0.89	5.49	44.11	0.58	1.3	0.96	65.69	72.71	0.59	1	1.44	25.16	51.08	0.72	0.8	0.95	108.17	100	3.27	3.67	NA	NA	NA	NA	NA	NA	NA	NA	NA	NA	NA	NA	NA	NA	NA	NA	NA	NA	0.71	0.42	1.11	1.12
hSQ013723	NM_016057	COPZ1	22818	0.89	5.49	44.11	-0.9	-0.2	-0.17	92.38	100	1.31	1.23	-1.78	14.69	32.58	0.93	0.88	0.2	108.17	100	5.82	5.96	2	0	0	0	0	0	0	0	0	0	NA	NA	NA	NA	NA	1326	534	NA	0.7	-0.09	0.95	1.02
hSQ038688	NM_002415	MIF	4282	0.89	5.49	44.14	-0.94	-0.17	0.24	90.93	100	2.88	3.02	-1.45	14.69	38.22	1	0.96	1.69	85.33	100	5.06	6.76	0	0	0	0	0	0	0	0	0	0	0	1	0	0	0	116	348	97	0.77	0.15	0.96	1.34
hSQ012691	NM_015325	KIAA0947	23379	0.89	5.49	44.19	-0.46	0.37	0.1	90.93	100	-1.3	-1.25	-1.81	14.69	32.13	0.97	0.92	-1.45	48.64	86.6	6.52	5.76	1	1	1	0	0	4	5	1	0	0	0	1	0	0	0	895	6801	222	0.82	0.05	0.96	0.88
hSQ029147	NM_021927	GUF1	60558	0.89	5.49	44.19	-0.24	0.39	-0.18	92.38	100	1.77	1.68	-1.24	14.69	41.98	0.94	0.91	-0.2	108.64	100	4.9	4.8	0	0	0	0	0	1	0	0	0	0	0	0	0	0	0	504	2010	157	0.63	-0.09	0.97	0.98
hSQ022734	NM_014641	MDC1	9656	0.89	5.49	44.28	-0.03	0.66	-0.87	58.83	100	1.48	1	-1.48	14.69	37.62	0.97	0.93	-0.69	108.64	100	7.32	6.89	1	1	1	1	1	1	0	0	0	0	0	1	0	0	0	658	6270	440	0.69	-0.49	0.96	0.94
hSQ008540	NM_138375	CABLES1	91768	0.89	5.49	44.28	0.05	0.67	0.1	90.93	100	0.8	0.84	-0.45	21.69	55.4	0.92	0.9	-0.19	108.64	100	4.57	4.48	0	0	0	0	0	2	0	0	0	0	0	0	0	0	0	1285	1107	78	0.62	0.04	0.98	0.98
hSQ039507	NM_001024934	WASF1	8936	0.89	5.49	44.28	0.18	1.25	-1.08	35.24	87.98	2.43	1.83	2.32	19.17	35.05	0.78	0.88	-0.06	108.64	100	4.39	4.33	2	0	0	1	0	2	0	0	0	0	0	0	0	0	0	703	1680	739	1.07	-0.6	1.13	0.99
hSQ021165	NM_015021	ZNF292	23036	0.89	5.49	44.31	-1.5	-0.84	0.54	84.11	90.51	-0.85	-0.58	-0.57	21.69	53.66	0.97	0.95	0.38	108.17	100	4.86	5.18	1	0	0	1	0	3	1	0	0	0	NA	NA	NA	NA	NA	1887	8172	NA	0.66	0.27	0.98	1.07
hSQ008566	NM_002806	PSMC6	5706	0.88	5.49	44.39	-1.98	-1.19	-0.11	92.38	100	1.08	0.98	1.29	26.28	53.32	0.84	0.91	0.17	108.17	100	6.19	6.47	0	0	0	0	0	0	0	0	0	0	NA	NA	NA	NA	NA	380	1170	NA	0.79	-0.1	1.09	1.05
hSQ036665	NM_001007027	ALG8	79053	0.88	5.49	44.4	-1.18	-0.58	-0.05	92.38	100	2.11	2.09	-2.92	14.69	19.46	0.94	0.86	-0.85	108.64	100	7.37	6.93	0	0	0	0	0	2	1	1	0	0	0	0	0	0	0	274	1404	65	0.59	-0.02	0.92	0.94
hSQ001800	NM_144580	C1orf85	112770	0.88	5.49	44.45	-1.13	-0.43	-0.37	92.38	100	1.99	1.84	-0.57	21.69	53.66	0.85	0.81	0.23	108.17	100	5.23	5.41	1	1	0	0	0	2	1	1	1	0	NA	NA	NA	NA	NA	350	1221	NA	0.7	-0.16	0.95	1.03
hSQ035310	NM_024639	ZNF322A	79692	0.88	5.49	44.51	-0.2	0.54	-0.67	90.93	100	1.01	0.68	-0.91	14.69	48.07	0.89	0.87	-0.69	108.64	100	5.19	4.82	2	0	0	0	0	2	2	1	0	0	0	0	0	0	0	2962	1209	629	0.74	-0.33	0.98	0.93
hSQ005513	NM_003825	SNAP23	8773	0.88	5.49	44.56	-1.04	-0.43	-0.62	91.61	100	-0.04	-0.36	-0.26	21.69	57.67	0.9	0.9	0.17	108.17	100	4.91	5.03	2	1	0	0	0	0	0	0	0	0	0	0	0	0	0	1580	636	91	0.61	-0.32	0.99	1.02
hSQ032758	NM_001008493	ENAH	55740	0.88	5.49	44.6	-2.19	-1.52	-1.16	30.1	82.16	2	1.39	-2.04	14.69	28.64	0.95	0.89	-0.27	108.64	100	6.19	6.02	5	2	2	0	0	1	0	0	1	0	0	0	0	0	0	10943	1776	453	0.67	-0.6	0.94	0.97
hSQ027903	NM_005370	RAB8A	4218	0.88	5.49	44.61	-0.31	0.36	-0.57	92.3	100	0.83	0.52	-0.62	21.69	52.81	0.93	0.91	0.1	108.17	100	4.88	4.94	0	1	0	0	0	0	0	0	0	0	0	0	0	0	0	1329	624	222	0.67	-0.31	0.99	1.01
hSQ029511	NM_012329	MMD	23531	0.88	5.49	44.63	2.6	3.41	-0.15	92.38	100	-2.78	-2.84	2.75	9.63	27.42	0.19	0.57	0.48	108.17	100	2.37	2.59	3	0	0	0	0	0	0	0	0	0	0	0	0	0	0	1721	717	285	0.81	-0.06	2.97	1.09
hSQ027801	NA	XM_498231	442340	0.88	5.49	44.65	-2.13	-1.37	-0.05	92.38	100	1.9	1.87	0.35	29.81	61.08	0.55	0.58	0.57	108.17	100	5.37	5.5	NA	NA	NA	NA	NA	NA	NA	NA	NA	NA	NA	NA	NA	NA	NA	NA	NA	NA	0.76	-0.03	1.07	1.02
hSQ028144	NM_002957	RXRA	6256	0.88	5.49	44.68	-1.1	-0.06	-0.27	92.38	100	-2.57	-2.7	0.48	29.81	60.91	0.81	0.86	-0.77	108.64	100	4.43	3.99	5	3	1	1	0	0	1	0	0	0	0	0	0	0	0	3972	1389	68	1.05	-0.12	1.07	0.9
hSQ042665	NM_002538	OCLN	4950	0.88	5.49	44.7	-1.99	-1.44	0.78	74.83	80.25	1.62	2.04	-1.27	14.69	41.47	0.92	0.89	-0.26	108.64	100	7.1	6.91	0	0	0	0	0	2	1	1	0	0	0	0	0	0	0	630	1569	436	0.55	0.42	0.97	0.97
hSQ019954	NM_152653	UBE2E2	7325	0.88	5.49	44.71	2.16	2.84	-0.25	92.38	100	1.53	1.42	-0.59	21.69	53.34	0.93	0.91	0.15	108.17	100	4.69	4.81	0	0	0	0	0	0	0	0	0	0	0	0	0	0	0	748	606	156	0.68	-0.11	0.98	1.03
hSQ011936	NM_018222	PARVA	55742	0.88	5.49	44.77	0.3	0.95	-0.25	92.38	100	-2.21	-2.32	1.32	25.16	52.9	0.81	0.87	-0.18	108.64	100	5.81	5.69	2	0	0	1	0	2	0	0	0	0	NA	NA	NA	NA	NA	1938	1119	NA	0.65	-0.11	1.08	0.98
hSQ018581	NM_001357	DHX9	1660	0.88	5.49	44.82	-3.31	-2.24	-0.39	92.38	100	1.7	1.42	-0.53	21.69	54.18	0.83	0.77	0.65	108.17	100	7.25	8.02	1	0	0	0	0	0	0	0	0	0	0	0	0	0	0	313	3813	163	1.07	-0.28	0.93	1.11
hSQ012487	NM_001008566	TPST2	8459	0.88	5.49	44.88	-0.96	-0.43	-0.15	92.38	100	-0.37	-0.44	0.73	29.81	59.67	0.78	0.81	0.23	108.17	100	3.65	3.78	2	2	1	1	1	0	2	0	0	0	0	0	0	0	0	525	1134	341	0.53	-0.07	1.05	1.03
hSQ043343	NM_003320	TUB	7275	0.88	9.76	44.98	2.07	2.91	-0.73	74.83	100	1.61	1.27	-1.35	14.69	40.07	0.96	0.86	-0.06	108.64	100	3.37	3.33	3	3	2	1	1	1	0	0	0	0	0	0	0	0	0	4486	1686	241	0.84	-0.34	0.89	0.99
hSQ041489	NM_015144	ZCCHC14	23174	0.87	9.76	45.07	1.14	2.03	-0.05	92.38	100	0.23	0.19	-0.16	21.69	58.66	0.92	0.91	-0.29	108.64	100	4.64	4.31	2	0	0	1	0	2	1	0	0	0	NA	NA	NA	NA	NA	4034	2850	NA	0.89	-0.04	0.99	0.93
hSQ006834	NM_002270	TNPO1	3842	0.87	9.76	45.09	-0.05	0.58	-0.08	92.38	100	1.06	1.01	-1.12	14.69	44.13	0.97	0.94	-0.26	108.64	100	9.38	9.06	3	1	0	0	0	1	3	1	0	0	0	0	0	0	0	5715	2697	147	0.63	-0.05	0.97	0.97
hSQ037106	NM_018154	ASF1B	55723	0.87	9.76	45.12	-1.33	-0.78	-0.59	91.91	100	1.55	1.27	-3.41	9.63	16.84	0.95	0.88	-0.12	108.64	100	5.27	5.18	1	1	0	0	0	0	0	0	0	0	0	0	0	0	0	949	609	172	0.55	-0.29	0.93	0.98
hSQ035972	NM_002532	NUP88	4927	0.87	9.76	45.16	-0.86	-0.26	-0.21	92.38	100	2.2	2.11	-2.21	14.69	26.42	0.95	0.91	0.69	108.17	100	8.28	8.94	0	0	0	0	0	2	1	0	0	0	NA	NA	NA	NA	NA	106	2226	NA	0.6	-0.09	0.96	1.08
hSQ023857	NM_016258	YTHDF2	51441	0.87	9.76	45.25	-1.59	-0.93	0.54	84.11	90.78	2.06	2.31	-0.52	21.69	54.32	0.86	0.83	0.49	108.17	100	7.77	8.32	1	0	0	0	0	0	1	0	0	0	0	0	0	0	0	822	1740	497	0.66	0.25	0.96	1.07
hSQ035695	NM_006750	SNTB2	6645	0.87	9.76	45.28	-1.66	-0.94	-1.42	13.85	62.01	0.14	-0.58	-3.04	9.63	18.65	0.96	0.89	-0.21	108.64	100	5.88	5.77	8	4	2	0	0	0	0	0	0	0	NA	NA	NA	NA	NA	8127	1623	NA	0.72	-0.72	0.93	0.98
hSQ009649	NM_005700	DPP3	10072	0.87	9.76	45.31	-1.79	-1.04	0.07	90.93	100	0.72	0.75	-1.53	14.69	36.87	0.92	0.87	0.05	108.17	100	8.24	8.3	0	0	0	0	0	0	1	0	0	0	0	0	0	0	0	408	2214	62	0.76	0.03	0.95	1.01
hSQ038975	NM_006370	VTI1B	10490	0.87	9.76	45.35	-1.18	-0.59	0.13	90.93	100	0.66	0.74	1.92	21.91	42.55	0.45	0.53	0.45	108.17	100	3.4	3.71	0	0	0	0	0	0	0	0	0	0	0	0	0	0	0	236	699	342	0.59	0.08	1.18	1.09
hSQ034684	NM_001024218	GPHN	10243	0.87	9.76	45.35	1.02	1.81	-0.48	92.38	100	1.22	0.97	0.05	29.81	60.26	0.85	0.85	0.02	108.17	100	9.54	9.56	1	1	0	0	0	2	1	0	0	0	1	1	0	0	0	869	2211	1121	0.79	-0.25	1	1
hSQ041597	NM_001694	ATP6V0C	527	0.87	9.76	45.36	-0.59	-0.02	0.36	84.11	98.07	1.03	1.19	-0.69	21.69	51.73	0.91	0.89	-0.64	108.64	100	5.7	5.34	0	0	0	0	0	0	0	0	0	0	0	0	0	0	0	472	468	152	0.57	0.15	0.98	0.94
hSQ038978	NA	mtRNA_COX-1	repname(hSQ038978)	0.87	9.76	45.37	-0.85	-0.1	0.26	90.93	100	1.46	1.71	-6.76	5.86	13.55	0.95	0.8	-0.09	108.64	100	4.52	4.44	NA	NA	NA	NA	NA	NA	NA	NA	NA	NA	NA	NA	NA	NA	NA	NA	NA	NA	0.74	0.25	0.84	0.98
hSQ044880	NM_139207	NAP1L1	4673	0.87	9.76	45.4	-1.55	-0.97	-1.01	43.3	93.21	1.56	1.07	-1.78	14.69	32.66	0.89	0.85	-0.76	108.64	100	8.11	7.28	1	1	1	0	0	0	0	0	0	0	0	0	0	0	0	2251	1176	124	0.58	-0.49	0.96	0.9
hSQ018955	NM_017645	FAM29A	54801	0.87	9.76	45.4	-1.15	-0.09	-0.82	65.69	100	0.37	-0.2	-0.02	21.69	59.85	0.93	0.93	-0.12	108.64	100	5.55	5.42	3	1	0	0	0	1	1	0	0	0	0	1	0	0	0	3199	2868	253	1.05	-0.57	1	0.98
hSQ007988	NA	HSP90AA3P::XM_496420	3322::440696	0.87	9.76	45.4	-1.07	-0.48	-0.46	92.38	100	1.8	1.6	-1.49	14.69	37.51	0.99	0.95	0.21	108.17	100	11.34	11.47	NA	NA	NA	NA	NA	NA	NA	NA	NA	NA	NA	NA	NA	NA	NA	NA	NA	NA	0.58	-0.21	0.96	1.01
hSQ044693	NM_058167	UBE2J2	118424	0.87	9.76	45.43	0.32	1.12	-0.06	92.38	100	2.07	2.04	-1.08	14.69	44.94	0.94	0.92	0.26	108.17	100	4.68	4.82	0	0	0	0	0	1	1	1	1	1	0	0	0	0	0	1289	780	189	0.8	-0.03	0.98	1.03
hSQ035000	NM_014059	C13orf15	28984	0.87	9.76	45.44	-0.59	0.48	-0.89	58.83	100	1.21	0.78	-1.25	14.69	41.8	0.94	0.91	0.11	108.17	100	3.6	3.68	0	0	0	0	0	0	0	0	0	0	0	1	0	0	0	392	414	302	1.07	-0.42	0.97	1.02
hSQ034601	NM_138385	TMEM129	92305	0.87	9.76	45.48	2.19	3.14	-0.72	84.11	100	1.2	0.83	0.36	29.81	61.08	0.88	0.89	-0.04	108.64	100	3.66	3.64	2	2	1	1	0	1	1	1	0	0	0	0	0	0	0	1457	699	520	0.94	-0.37	1.02	1
hSQ018653	NM_020923	ZDBF2	57683	0.87	9.76	45.48	-2.25	-1.63	-0.28	92.38	100	0.61	0.42	-0.23	21.69	58.01	0.85	0.83	0.44	108.17	100	5.52	5.89	0	0	0	0	0	1	1	0	0	0	0	0	0	0	0	2831	7065	250	0.62	-0.19	0.98	1.07
hSQ013848	NM_015092	SMG1	23049	0.87	9.76	45.48	-1.71	-1.11	0.16	90.93	100	0.14	0.2	0.31	29.81	61.07	0.74	0.77	0.16	108.17	100	3.5	3.57	1	1	0	0	0	1	0	0	1	0	NA	NA	NA	NA	NA	4715	10986	NA	0.61	0.07	1.03	1.02
hSQ008535	NM_001357	DHX9	1660	0.87	9.76	45.51	-2.81	-1.53	-0.41	92.38	100	1.46	1.2	-0.09	21.69	59.35	0.81	0.8	0.38	108.17	100	7.63	8.11	1	0	0	0	0	0	0	0	0	0	0	0	0	0	0	313	3813	163	1.28	-0.26	0.99	1.06
hSQ035204	NM_003074	SMARCC1	6599	0.87	9.76	45.58	-1.35	-0.39	-0.1	92.38	100	1.28	1.23	0.11	29.81	60.56	0.87	0.88	0.35	108.17	100	8.61	9.16	3	2	1	1	0	1	1	0	0	0	0	0	0	0	0	2312	3304	119	0.96	-0.05	1.01	1.06
hSQ024774	NM_006106	YAP1	10413	0.87	9.76	45.6	-1.12	-0.54	0.14	90.93	100	-2.05	-1.97	-2.25	14.69	25.97	0.92	0.83	-0.17	108.64	100	5.89	5.78	4	4	1	1	0	0	0	0	0	0	0	1	0	0	0	3475	1365	249	0.58	0.08	0.91	0.98
hSQ033263	NM_005983	SKP2	6502	0.87	9.76	45.61	0.59	1.7	-1.49	13.85	56.48	1.21	0.25	2.8	9.63	26.44	0.67	0.83	0.06	108.17	100	4.1	4.16	1	0	0	0	0	1	1	0	0	0	0	0	0	0	0	143	1275	176	1.11	-0.96	1.23	1.01
hSQ014979	NM_006769	LMO4	8543	0.87	9.76	45.68	0.24	0.9	-0.46	92.38	100	0.59	0.35	1.36	25.16	52.32	0.82	0.86	1.07	108.17	100	4.22	4.83	1	1	1	0	0	0	1	0	0	0	0	0	0	0	0	771	498	780	0.66	-0.23	1.05	1.14
hSQ036797	NM_004547	NDUFB4	4710	0.86	9.76	45.69	0.68	1.54	-0.28	92.38	100	3.29	3.1	-1.32	14.69	40.6	1	0.97	-0.08	108.64	100	5.93	5.85	0	0	0	0	0	1	0	0	0	0	0	0	0	0	0	58	390	79	0.86	-0.19	0.97	0.99
hSQ021593	NM_002875	RAD51	5888	0.86	9.76	45.7	-0.71	0.04	-1.67	9.09	43.16	0.82	-0.09	-2.96	14.69	19.16	0.96	0.89	-0.53	108.64	100	7.2	6.81	1	2	1	1	1	0	0	0	0	0	0	0	0	0	0	980	1020	267	0.75	-0.91	0.92	0.95
hSQ012578	NM_170721	MSI2	124540	0.86	9.76	45.73	-0.49	0.25	0	92.38	100	1.34	1.34	0.01	29.81	60.06	0.75	0.75	-0.08	108.64	100	4.31	4.25	0	0	0	0	0	1	0	0	1	0	NA	NA	NA	NA	NA	1351	756	NA	0.75	0	1	0.99
hSQ041891	NM_194285	SPTY2D1	144108	0.86	9.76	45.81	-0.63	0.07	-0.04	92.38	100	0.35	0.33	-1.14	14.69	43.83	0.84	0.81	-1.52	44.12	82.88	6.93	6.11	2	1	1	0	0	1	1	0	1	0	0	1	0	0	0	3459	2058	216	0.7	-0.02	0.96	0.88
hSQ008687	NA	RPL27	6155	0.86	9.76	45.83	-0.08	0.7	0.14	90.93	100	3.12	3.21	-1.1	14.69	44.64	0.94	0.88	-1.29	59.85	95.37	7.8	7.07	NA	NA	NA	NA	NA	NA	NA	NA	NA	NA	NA	NA	NA	NA	NA	NA	NA	NA	0.78	0.08	0.94	0.91
hSQ018115	NA	RPL27	6155	0.86	9.76	45.89	-0.17	0.74	0.54	84.11	90.64	2.78	3.02	-1.04	14.69	45.65	0.96	0.91	-0.5	108.64	100	8.52	7.91	NA	NA	NA	NA	NA	NA	NA	NA	NA	NA	NA	NA	NA	NA	NA	NA	NA	NA	0.91	0.24	0.95	0.93
hSQ034493	NM_005746	NAMPT	10135	0.86	9.76	45.9	-1.98	-1.4	-0.44	92.38	100	0.22	0.07	-0.72	19.17	51.19	0.9	0.87	-0.37	108.64	100	7.59	7.32	2	1	1	0	0	1	1	0	0	0	0	0	0	0	0	2797	1476	308	0.59	-0.16	0.96	0.96
hSQ024683	NM_018155	SLC25A36	55186	0.86	9.76	45.97	-1.2	-0.35	0.17	90.93	100	0.11	0.22	0.17	29.81	60.78	0.83	0.84	0.06	108.17	100	3.56	3.62	1	0	0	0	0	0	0	0	0	0	0	0	0	0	0	858	933	209	0.85	0.11	1.01	1.01
hSQ036694	NM_000167	GK	2710	0.86	9.76	46.05	-0.75	-0.13	-0.23	92.38	100	-0.72	-0.82	-0.6	21.69	53.1	0.91	0.9	-0.21	108.64	100	6.55	6.44	0	0	0	0	0	0	0	0	0	0	0	0	0	0	0	1865	1575	115	0.62	-0.11	0.99	0.98
hSQ032719	NM_020862	LRFN1	57622	0.86	9.76	46.06	1.93	2.95	-0.27	92.38	100	2.11	1.97	2.85	9.63	25.62	0.55	0.75	-0.23	108.64	100	4.3	4.14	1	2	1	1	1	0	3	0	0	0	NA	NA	NA	NA	NA	816	2316	NA	1.02	-0.15	1.37	0.96
hSQ009343	NM_013323	SNX11	29916	0.86	9.76	46.15	3	3.75	0.3	84.11	100	1.88	2.05	-0.97	14.69	47.01	0.86	0.84	0.47	108.17	100	3.85	4.05	0	0	0	0	0	1	3	1	0	0	0	0	0	0	0	1235	813	267	0.75	0.18	0.97	1.05
hSQ002858	NM_030978	ARPC5L	81873	0.86	9.76	46.19	-0.42	0.11	-0.17	92.38	100	1.26	1.19	-1.14	14.69	43.81	0.95	0.9	0.18	108.17	100	4.27	4.35	1	1	0	0	0	0	0	0	0	0	0	0	0	0	0	476	462	86	0.54	-0.07	0.95	1.02
hSQ022855	NM_198531	ATP9B	374868	0.86	9.76	46.19	1.75	2.29	0.12	90.93	100	-0.93	-0.88	1.95	21.91	41.92	0.48	0.7	-0.65	108.64	100	6.25	5.81	0	0	0	0	0	1	1	0	0	0	NA	NA	NA	NA	NA	897	3444	NA	0.53	0.05	1.45	0.93
hSQ031173	NA	RNU63	26785	0.86	9.76	46.2	-3.76	-2.99	-0.57	92.3	100	-0.2	-0.52	1.18	26.68	54.92	0.08	0.19	0.36	108.17	100	2.77	2.98	NA	NA	NA	NA	NA	NA	NA	NA	NA	NA	NA	NA	NA	NA	NA	NA	NA	NA	0.78	-0.32	2.34	1.07
hSQ020701	NM_024698	SLC25A22	79751	0.86	9.76	46.23	1.48	2.23	0.58	84.11	89.13	0.48	0.73	0.52	29.81	60.78	0.88	0.91	1.16	85.33	100	5.36	6.28	0	1	0	0	0	0	0	0	0	0	0	1	0	0	0	1439	972	342	0.75	0.25	1.03	1.17
hSQ031013	NM_173074	PIGF	5281	0.86	9.76	46.25	-1.49	-0.89	-0.37	92.38	100	2.19	1.97	0.22	29.81	60.93	0.82	0.83	0.03	108.17	100	3.93	3.96	0	0	0	0	0	1	1	1	0	0	0	0	0	0	0	347	621	164	0.6	-0.23	1.01	1.01
hSQ009500	NM_002401	MAP3K3	4215	0.86	9.76	46.31	0.64	1.45	-0.16	92.38	100	0.3	0.21	1.47	23.79	50.56	0.8	0.85	-0.33	108.64	100	4.28	4.08	1	1	0	1	0	1	1	1	0	0	0	0	0	0	0	2532	1881	319	0.81	-0.09	1.07	0.95
hSQ004498	NM_003310	TSSC1	7260	0.86	9.76	46.33	-1.77	-1.1	-0.03	92.38	100	1.43	1.42	-1.75	14.69	33.16	0.92	0.85	0.82	108.17	100	4.03	4.68	0	0	0	0	0	1	1	1	1	1	0	0	0	0	0	362	1164	138	0.67	-0.01	0.92	1.16
hSQ021990	NM_005431	XRCC2	7516	0.86	9.76	46.34	-1.06	-0.34	0.03	90.93	100	2.5	2.51	0.62	29.81	60.34	0.65	0.73	-0.3	108.64	100	3.79	3.56	0	2	0	0	0	2	1	1	0	0	0	0	0	0	0	2138	843	86	0.72	0.02	1.12	0.94
hSQ013467	NM_005736	ACTR1A	10121	0.85	9.76	46.37	1.36	2	-0.06	92.38	100	1.27	1.24	-0.12	21.69	59.05	0.88	0.88	0.42	108.17	100	6.98	7.3	2	0	0	0	0	0	0	0	0	0	0	0	0	0	0	1633	1131	58	0.64	-0.03	1	1.05
hSQ010321	NA	LOC441454::PTMA	441454	0.85	9.76	46.38	-1.28	-0.46	-0.28	92.38	100	1.84	1.64	-0.47	21.69	55.11	0.95	0.93	-0.41	108.64	100	5.51	4.87	NA	NA	NA	NA	NA	NA	NA	NA	NA	NA	NA	NA	NA	NA	NA	NA	NA	NA	0.82	-0.2	0.98	0.88
hSQ027597	NM_001001974	PLEKHA1	59338	0.85	9.76	46.46	-0.55	0.11	-0.65	90.93	100	0.99	0.58	-1.5	14.69	37.34	0.89	0.85	0.24	108.17	100	3.24	3.39	0	2	0	0	0	1	0	0	1	0	0	0	0	0	0	2412	1215	123	0.65	-0.41	0.95	1.05
hSQ033583	NM_003200	TCF3	6929	0.85	9.76	46.57	-0.26	0.45	-0.5	92.38	100	-0.48	-0.7	0.05	29.81	60.28	0.81	0.82	-1.39	51.15	89.94	4.96	4.2	2	2	0	1	0	1	1	1	1	1	NA	NA	NA	NA	NA	2411	1965	NA	0.71	-0.23	1	0.85
hSQ044441	NM_001001974	PLEKHA1	59338	0.85	9.76	46.61	-0.32	0.45	-1	43.3	93.81	1.26	0.74	-1.84	14.69	31.69	0.92	0.86	0.15	108.17	100	3.42	3.5	0	2	0	0	0	1	0	0	1	0	0	0	0	0	0	2412	1215	123	0.77	-0.52	0.94	1.03
hSQ006908	NM_001079880	PRKD2	25865	0.85	9.76	46.62	0.22	0.94	-0.08	92.38	100	0.38	0.34	-1.67	14.69	34.35	0.89	0.87	0.2	108.17	100	6.51	6.62	0	0	0	0	0	2	1	1	0	0	0	0	0	0	0	207	2637	478	0.72	-0.04	0.97	1.02
hSQ026213	NM_152903	KBTBD6	89890	0.85	9.76	46.62	-0.41	0.22	0.24	90.93	100	1.45	1.57	0.03	29.81	60.16	0.86	0.87	-0.03	108.64	100	8.31	8.28	1	0	0	1	0	2	1	0	0	0	0	0	0	0	0	2914	2025	289	0.63	0.12	1	1
hSQ040791	NM_017412	FZD3	7976	0.85	9.76	46.65	-0.63	-0.01	0.2	90.93	100	0.21	0.32	-0.84	19.17	49.27	0.96	0.94	-0.11	108.64	100	4.66	4.59	2	0	0	0	0	1	0	0	1	0	0	0	0	0	0	1431	2001	478	0.62	0.11	0.98	0.98
hSQ019390	NM_005760	CEBPZ	10153	0.85	9.76	46.67	-0.7	0.01	-0.04	92.38	100	1.65	1.63	-0.49	21.69	54.73	0.96	0.94	0.34	108.17	100	8.39	8.6	0	0	0	0	0	1	1	1	1	1	NA	NA	NA	NA	NA	126	3165	NA	0.71	-0.02	0.98	1.03
hSQ013595	NM_002106	H2AFZ	3015	0.85	9.76	46.72	-1.07	-0.32	-1.08	35.24	88.07	4.79	3.98	-1.54	14.69	36.63	1.01	0.97	-0.42	108.64	100	8.69	7.93	1	0	0	0	0	0	0	0	0	0	1	0	0	0	0	375	387	185	0.76	-0.81	0.97	0.91
hSQ039497	NM_001640	APEH	327	0.85	9.76	46.73	-1.48	-0.83	-0.11	92.38	100	0.18	0.13	-1.41	14.69	38.96	0.92	0.89	0.4	108.17	100	6.52	6.88	0	0	0	0	0	2	3	0	0	0	0	0	0	0	0	158	2199	400	0.65	-0.05	0.97	1.06
hSQ028981	NM_016145	C19orf56	51398	0.85	9.76	46.73	-1.41	-0.76	0.3	84.11	100	1.68	1.82	-2.01	14.69	29.15	0.96	0.91	0.25	108.17	100	4.36	4.52	1	0	0	0	0	0	0	0	0	0	0	0	0	0	0	286	321	232	0.65	0.14	0.94	1.04
hSQ000404	NM_033222	PSIP1	11168	0.85	9.76	46.73	-2.6	-2.04	-0.33	92.38	100	0.26	0.12	-2.02	14.69	28.98	0.98	0.93	0.92	108.17	100	7.52	7.98	0	0	0	0	0	0	0	0	0	0	0	0	0	0	0	1452	1593	309	0.56	-0.14	0.95	1.06
hSQ028579	NM_005566	LDHA	3939	0.85	9.76	46.74	-1	-0.29	-0.37	92.38	100	1.52	1.31	-1.53	14.69	36.84	0.97	0.94	0.54	108.17	100	9.43	10.29	0	0	0	0	0	0	1	0	0	0	0	0	0	0	0	565	999	97	0.7	-0.2	0.97	1.09
hSQ034657	NA	C19orf42::MED26	79086::9441	0.85	9.76	46.77	-1.08	-0.54	0.5	84.11	92.19	0.87	1.08	-1.25	14.69	41.92	0.97	0.92	-0.29	108.64	100	3.72	3.54	NA	NA	NA	NA	NA	NA	NA	NA	NA	NA	NA	NA	NA	NA	NA	NA	NA	NA	0.54	0.21	0.95	0.95
hSQ022849	NM_006197	PCM1	5108	0.85	9.76	46.79	-1.54	-0.9	-0.08	92.38	100	-1.31	-1.36	-0.72	19.17	51.17	0.94	0.92	0.09	108.17	100	6.92	7.04	1	1	0	0	0	0	1	0	0	0	1	0	0	0	0	2286	6075	422	0.64	-0.05	0.97	1.02
hSQ013068	NM_016131	RAB10	10890	0.85	9.76	46.81	-1.42	-0.8	-0.79	65.69	100	0.15	-0.25	-0.82	19.17	49.61	0.91	0.88	-0.27	108.64	100	6.72	6.45	2	1	1	1	1	1	0	0	0	0	0	0	0	0	0	2388	603	504	0.62	-0.4	0.97	0.96
hSQ014639	NM_015325	KIAA0947	23379	0.85	9.76	46.86	0.08	0.9	-0.14	92.38	100	-0.47	-0.56	-2.09	14.69	27.96	0.98	0.93	-0.62	108.64	100	6.95	6.54	1	1	1	0	0	4	5	1	0	0	0	1	0	0	0	895	6801	222	0.82	-0.09	0.95	0.94
hSQ028502	NM_001123	ADK	132	0.85	9.76	46.86	-1.07	-0.45	0.13	90.93	100	0.79	0.86	-1.28	14.69	41.23	0.95	0.91	0.09	108.17	100	6.62	6.7	0	0	0	0	0	1	0	0	1	0	0	1	0	0	0	856	1038	187	0.62	0.07	0.96	1.01
hSQ027602	NM_002296	LBR	3930	0.85	9.76	46.88	0.61	1.4	-0.17	92.38	100	2.26	2.17	-0.82	19.17	49.54	0.95	0.93	-0.05	108.64	100	10.18	10.1	1	0	0	0	0	1	0	0	1	0	0	0	0	0	0	1800	1848	143	0.79	-0.09	0.98	0.99
hSQ025889	NM_018304	PRR11	55771	0.85	9.76	46.91	-2.23	-1.63	0.39	84.11	96.64	-0.93	-0.67	0.42	29.81	61.02	0.72	0.82	-0.61	108.64	100	5.63	4.54	0	0	0	0	0	0	1	0	0	0	0	0	0	0	0	155	1083	79	0.59	0.26	1.14	0.81
hSQ044043	NM_144781	PDCD2	5134	0.85	9.76	46.91	-1.57	-1.01	-0.16	92.38	100	1.37	1.3	0.85	29.12	58.68	0.84	0.87	0.34	108.17	100	3.35	3.48	1	3	0	0	0	0	0	0	0	0	1	0	0	0	0	1280	687	79	0.55	-0.07	1.04	1.04
hSQ044095	NM_006110	CD2BP2	10421	0.85	9.76	46.92	-1.13	-0.57	0.13	90.93	100	2.43	2.5	-3.44	9.63	16.73	0.97	0.9	0.36	108.17	100	6.21	6.52	0	0	0	0	0	0	0	0	0	0	0	0	0	0	0	137	1026	121	0.56	0.06	0.93	1.05
hSQ041140	NM_145858	CRYZL1	9946	0.85	9.76	46.96	-1.34	-0.68	0.67	74.83	85.12	-0.85	-0.53	-0.4	21.69	56.02	0.83	0.78	-0.16	108.64	100	3.17	3.07	0	0	0	0	0	2	2	1	0	0	0	0	0	0	0	478	1050	180	0.66	0.32	0.94	0.97
hSQ012494	NM_002154	HSPA4	3308	0.85	9.76	46.96	-1.12	-0.55	-0.07	92.38	100	2.27	2.24	-1.97	14.69	29.63	0.98	0.93	-0.28	108.64	100	11.25	11.06	0	0	0	0	0	2	1	1	1	0	0	0	0	0	0	580	2523	281	0.56	-0.03	0.95	0.98
hSQ005181	NM_001008493	ENAH	55740	0.85	9.76	46.98	-2.75	-2.1	-0.58	92.3	100	0.84	0.58	-2.17	14.69	26.94	0.94	0.85	0.04	108.17	100	5.19	5.22	5	2	2	0	0	1	0	0	1	0	0	0	0	0	0	10943	1776	453	0.65	-0.26	0.91	1.01
hSQ031069	NA	LOC441915	441915	0.85	9.76	47.01	-1.29	-0.65	-0.83	65.69	100	1.83	1.47	-2.18	14.69	26.8	0.9	0.84	-0.13	108.64	100	4.6	4.51	NA	NA	NA	NA	NA	NA	NA	NA	NA	NA	NA	NA	NA	NA	NA	NA	NA	NA	0.64	-0.36	0.93	0.98
hSQ029086	NM_003768	PEA15	8682	0.84	9.76	47.05	1.27	2.07	-0.69	84.11	100	0.55	0.25	0.23	29.81	60.96	0.86	0.87	-0.28	108.64	100	4.62	4.46	2	0	0	2	0	0	1	0	0	0	0	0	0	0	0	1884	393	188	0.8	-0.3	1.01	0.96
hSQ031206	NM_025009	CEP135	9662	0.84	9.76	47.15	-1.75	-1.09	-0.29	92.38	100	1.43	1.24	0.3	29.81	61.06	0.88	0.9	0.15	108.17	100	4.31	4.44	0	1	0	0	0	0	0	0	0	0	0	1	0	0	0	2012	3423	234	0.66	-0.18	1.02	1.03
hSQ004489	NM_153260	LRRC57	255252	0.84	9.76	47.15	1.37	2.12	-0.87	58.83	100	-0.08	-0.44	1.84	22.31	44.07	0.81	0.85	0.1	108.17	100	4.24	4.31	1	1	1	1	1	0	0	0	0	0	0	0	0	0	0	1559	720	368	0.76	-0.37	1.05	1.02
hSQ016647	NA	ZSCAN12	9753	0.84	9.76	47.16	-0.89	-0.24	-0.26	92.38	100	1.04	0.89	3.16	8.94	20.87	0.34	0.61	-0.02	108.64	100	4.12	4.11	NA	NA	NA	NA	NA	NA	NA	NA	NA	NA	NA	NA	NA	NA	NA	NA	NA	NA	0.65	-0.15	1.8	1
hSQ022966	NM_012249	RHOQ	23433	0.84	9.76	47.17	-1.63	-1.05	-0.23	92.38	100	0.18	0.08	2.25	21.69	36.35	0.61	0.75	0.39	108.17	100	2.84	3.04	4	1	1	3	1	0	1	0	0	0	0	0	0	0	0	3603	618	319	0.57	-0.1	1.24	1.07
hSQ037606	NM_003676	DEGS1	8560	0.84	9.76	47.18	-0.33	0.19	0.15	90.93	100	2.71	2.76	-2.1	14.69	27.84	0.96	0.91	0.54	108.17	100	8.27	8.76	0	0	0	0	0	2	0	0	0	0	0	0	0	0	0	960	972	111	0.52	0.05	0.95	1.06
hSQ008856	NM_004863	SPTLC2	9517	0.84	9.76	47.2	0.59	1.15	0.16	90.93	100	1.56	1.65	-1.82	14.69	32.06	0.95	0.92	-0.17	108.64	100	8.01	7.88	2	2	1	0	0	1	2	1	0	0	1	0	0	0	0	5355	1689	188	0.55	0.09	0.97	0.98
hSQ000730	NM_024045	DDX50	79009	0.84	9.76	47.25	-1.88	-1.28	-0.49	92.38	100	1.06	0.87	-0.4	21.69	55.98	0.87	0.85	0.11	108.17	100	6.04	6.12	0	0	0	0	0	0	1	0	0	0	0	0	0	0	0	216	2214	107	0.6	-0.19	0.97	1.01
hSQ032823	NM_004035	ACOX1	51	0.84	9.76	47.29	1	1.84	-0.35	92.38	100	-0.36	-0.52	2.67	14.69	28.74	0.75	0.87	-0.01	108.64	100	7.67	7.65	4	0	0	1	0	2	0	0	0	0	0	0	0	0	0	5235	1983	290	0.84	-0.16	1.16	1
hSQ010688	NM_005700	DPP3	10072	0.84	9.76	47.39	-0.71	-0.11	0.83	74.83	78.22	0.36	0.67	-0.35	21.69	56.62	0.85	0.84	-0.46	108.64	100	7.85	7.42	0	0	0	0	0	0	1	0	0	0	0	0	0	0	0	408	2214	62	0.6	0.31	0.99	0.95
hSQ003595	NM_003321	TUFM	7284	0.84	9.76	47.4	-1.49	-0.81	-0.01	92.38	100	0.83	0.83	-3.01	9.63	18.87	0.97	0.91	0.33	108.17	100	7.57	7.81	0	0	0	0	0	0	0	0	0	0	0	0	0	0	0	184	1368	53	0.68	0	0.94	1.03
hSQ033801	NM_018477	ACTR10	55860	0.84	9.76	47.4	-2.1	-1.49	-0.45	92.38	100	1.34	1.16	-2.49	14.69	23.15	0.98	0.92	0.7	108.17	100	5.92	6.61	0	0	0	0	0	0	0	0	0	0	1	0	0	1	0	1084	1254	103	0.61	-0.18	0.95	1.12
hSQ033773	NM_018071	FLJ10357	55701	0.84	9.76	47.41	0.98	1.84	-0.59	91.91	100	-2.98	-3.2	0.3	29.81	61.06	0.87	0.88	-0.11	108.64	100	5.11	5.04	2	1	1	0	0	2	3	1	0	0	NA	NA	NA	NA	NA	868	4560	NA	0.86	-0.22	1.01	0.99
hSQ029150	NM_206824	VKORC1	79001	0.84	9.76	47.48	-1.28	-0.64	-0.52	92.38	100	1.21	0.95	-1.95	14.69	29.94	0.95	0.9	0.22	108.17	100	4.43	4.54	0	1	0	0	0	0	0	0	0	0	0	0	0	0	0	382	279	226	0.64	-0.27	0.95	1.03
hSQ028148	NM_018312	SAPS3	55291	0.84	9.76	47.55	-0.43	0.1	0.28	90.93	100	0.61	0.76	-1.86	14.69	31.35	0.95	0.9	-0.09	108.64	100	8.08	8.03	2	1	0	1	0	1	0	0	0	0	0	0	0	0	0	2214	2382	359	0.53	0.16	0.95	0.99
hSQ041526	NM_024656	GLT25D1	79709	0.84	9.76	47.58	-0.44	0.11	-0.58	91.91	100	0.79	0.5	-2.44	14.69	23.72	0.94	0.89	-0.66	108.64	100	6.22	5.97	1	4	1	0	0	2	1	0	0	0	NA	NA	NA	NA	NA	1712	1869	NA	0.55	-0.29	0.94	0.96
hSQ004631	NA	MFSD3	113655	0.84	9.76	47.62	-1.2	-0.59	-0.23	92.38	100	2.06	1.95	-1.79	14.69	32.51	0.89	0.84	0.44	108.17	100	4.71	4.98	NA	NA	NA	NA	NA	NA	NA	NA	NA	NA	NA	NA	NA	NA	NA	NA	NA	NA	0.61	-0.11	0.94	1.06
hSQ042311	NM_002039	GAB1	2549	0.84	9.76	47.67	0.47	1.28	-0.97	43.3	95.4	-0.34	-0.87	-1.19	14.69	42.91	0.88	0.81	-1.16	71.06	100	6.53	5.87	2	0	0	0	0	0	0	0	0	0	0	0	0	0	0	936	2085	223	0.81	-0.53	0.93	0.9
hSQ028687	NA	COX11P	140468	0.84	9.76	47.68	-2.21	-1.67	-0.25	92.38	100	2.2	2.1	-1.92	14.69	30.43	0.94	0.89	0.4	108.17	100	3.46	3.71	NA	NA	NA	NA	NA	NA	NA	NA	NA	NA	NA	NA	NA	NA	NA	NA	NA	NA	0.54	-0.1	0.95	1.07
hSQ021092	NM_003878	GGH	8836	0.84	9.76	47.7	-0.75	0.5	-0.31	92.38	100	0.57	0.31	0.26	29.81	61.01	0.92	0.94	0.53	108.17	100	5.04	5.58	0	1	0	0	0	1	0	0	0	0	0	0	0	0	0	248	957	59	1.25	-0.26	1.01	1.11
hSQ033817	NM_207111	RNF216	54476	0.84	9.76	47.7	2.47	3.16	-0.5	92.38	100	0.57	0.33	-1.47	14.69	37.81	0.97	0.93	-0.68	108.64	100	7.41	6.97	5	3	1	1	0	1	0	0	0	0	0	0	0	0	0	2813	2772	190	0.69	-0.24	0.96	0.94
hSQ014890	NA	TRNK	4566	0.83	9.76	47.72	-1.19	-0.63	0.28	84.11	100	-0.51	-0.31	2.07	21.91	39.69	0.24	0.41	-0.08	108.64	100	3.58	3.54	NA	NA	NA	NA	NA	NA	NA	NA	NA	NA	NA	NA	NA	NA	NA	NA	NA	NA	0.56	0.2	1.72	0.99
hSQ038467	NA	LOC442255	442255	0.83	9.76	47.76	-1.06	-0.42	-0.02	92.38	100	2.78	2.77	-1.13	14.69	43.97	0.92	0.87	0.63	108.17	100	7.67	8.09	NA	NA	NA	NA	NA	NA	NA	NA	NA	NA	NA	NA	NA	NA	NA	NA	NA	NA	0.63	-0.01	0.95	1.06
hSQ019601	NA	C10orf75	90271	0.83	9.76	47.78	-1.32	-0.8	-0.59	91.91	100	0.22	-0.07	-0.62	21.69	52.92	0.84	0.82	-0.26	108.64	100	3.65	3.51	NA	NA	NA	NA	NA	NA	NA	NA	NA	NA	NA	NA	NA	NA	NA	NA	NA	NA	0.52	-0.28	0.98	0.96
hSQ019386	NM_004897	MINPP1	9562	0.83	9.76	47.83	-0.59	0.08	0.15	90.93	100	0.27	0.36	-0.11	21.69	59.18	0.92	0.91	0.62	108.17	100	6.35	6.8	0	0	0	0	0	0	0	0	0	0	NA	NA	NA	NA	NA	909	1464	NA	0.68	0.1	0.99	1.07
hSQ034797	NM_006464	TGOLN2	10618	0.83	9.76	47.84	0.57	1.55	-0.24	92.38	100	-0.73	-0.86	-1.21	14.69	42.48	0.95	0.9	-0.92	108.64	100	6.07	5.52	4	1	1	1	0	1	0	0	0	0	0	0	0	0	0	4712	1314	289	0.98	-0.13	0.95	0.91
hSQ008660	NM_004048	B2M	567	0.83	9.76	47.9	0.51	1.8	0.39	84.11	96.73	-1.44	-1.15	-0.44	21.69	55.41	0.97	0.95	0.02	108.17	100	4.6	4.63	0	0	0	0	0	0	0	0	0	0	0	0	0	0	0	566	360	60	1.29	0.29	0.98	1
hSQ032250	NM_004897	MINPP1	9562	0.83	9.76	47.91	-1.86	-1.28	-0.15	92.38	100	1.1	1.03	-3.45	9.63	16.7	0.97	0.92	0.89	108.17	100	5.94	6.56	0	0	0	0	0	0	0	0	0	0	NA	NA	NA	NA	NA	909	1464	NA	0.58	-0.08	0.94	1.1
hSQ009441	NM_014177	C18orf55	29090	0.83	9.76	47.94	-1.71	-1.21	0.29	84.11	100	1.31	1.44	-1.95	14.69	30.01	0.87	0.79	-0.14	108.64	100	4.6	4.48	1	0	0	0	0	0	0	0	0	0	0	0	0	0	0	489	747	298	0.5	0.13	0.91	0.97
hSQ035108	NM_001007067	SDCBP	6386	0.83	9.76	47.94	-1.45	-0.81	0.15	90.93	100	0.29	0.38	-1.6	14.69	35.53	0.96	0.91	0.61	108.17	100	7.31	7.73	2	0	0	0	0	0	0	0	0	0	0	0	0	0	0	1119	897	147	0.64	0.08	0.95	1.06
hSQ041130	NM_001006109	C3orf37	56941	0.83	9.76	47.95	-1.38	-0.86	0.23	90.93	100	1.41	1.51	-2.88	14.69	19.72	0.94	0.88	0.29	108.17	100	6.61	6.77	1	0	0	1	0	0	1	0	0	0	0	0	0	0	0	465	1065	261	0.52	0.11	0.94	1.02
hSQ028292	NM_001024463	HISPPD2A	9677	0.83	9.76	47.96	-1.06	-0.2	0.33	84.11	99.28	-1.08	-0.91	-0.94	14.69	47.5	0.9	0.88	-0.75	108.64	100	4.89	4.53	1	0	0	1	0	1	2	0	0	0	1	0	0	0	0	1211	3585	123	0.86	0.17	0.98	0.93
hSQ040403	NM_175852	TXLNA	200081	0.83	9.76	47.98	0.55	1.21	-0.1	92.38	100	1.15	1.1	-0.37	21.69	56.36	0.86	0.84	-0.69	108.64	100	5.9	5.44	2	4	0	0	0	0	0	0	0	0	0	0	0	0	0	3089	1641	65	0.67	-0.05	0.98	0.92
hSQ005904	NM_018222	PARVA	55742	0.83	9.76	47.99	-0.67	-0.03	0.51	84.11	91.81	-1.11	-0.88	-1.83	14.69	31.81	0.91	0.87	-0.07	108.64	100	6.22	6.18	2	0	0	1	0	2	0	0	0	0	NA	NA	NA	NA	NA	1938	1119	NA	0.64	0.23	0.96	0.99
hSQ038616	NM_005063	SCD	6319	0.83	9.76	48	1.62	2.58	-1.08	35.24	88.34	0.15	-0.32	-0.16	21.69	58.68	0.89	0.88	-0.55	108.64	100	8.82	8.07	3	3	1	1	1	0	0	0	0	0	0	0	0	0	0	3897	1080	490	0.96	-0.47	0.99	0.91
hSQ042783	NM_145266	NUDCD2	134492	0.83	9.76	48	-1.22	-0.34	-0.41	92.38	100	0.49	0.09	0.94	28.01	57.8	0.81	0.9	0.57	108.17	100	2.7	3.08	1	1	1	0	0	0	0	0	0	0	0	0	0	0	0	386	474	87	0.88	-0.4	1.11	1.14
hSQ041864	NM_001012732	DCTD	1635	0.83	9.76	48.2	1.71	2.48	-1.34	15.82	68.05	-0.31	-0.94	0.67	29.81	60.08	0.68	0.74	-0.25	108.64	100	3.65	3.49	1	1	0	0	0	2	0	0	0	0	0	0	0	0	0	1307	570	164	0.77	-0.63	1.09	0.96
hSQ015025	NM_152734	C6orf89	221477	0.83	9.76	48.22	-1.39	-0.59	-0.71	84.11	100	-0.86	-1.23	-0.79	19.17	50	0.95	0.91	0.25	108.17	100	4.93	5.04	3	4	1	0	0	0	0	0	0	0	0	0	0	0	0	5521	1065	163	0.8	-0.37	0.96	1.02
hSQ005705	NM_007065	CDC37	11140	0.83	9.76	48.23	-1.42	-0.82	0.26	90.93	100	2.07	2.2	-2.4	14.69	24.17	0.94	0.87	0.76	108.17	100	5.79	6.46	0	0	0	0	0	0	0	0	0	0	0	0	0	0	0	418	1137	116	0.6	0.13	0.92	1.11
hSQ016174	NM_015045	WAPAL	23063	0.83	9.76	48.32	-1.12	-0.46	-0.17	92.38	100	0.32	0.22	-1.52	14.69	36.91	0.96	0.92	-0.48	108.64	100	7.33	7.04	1	0	0	0	0	1	1	0	1	0	0	0	0	0	0	2287	3573	442	0.67	-0.1	0.96	0.96
hSQ033171	NM_002154	HSPA4	3308	0.83	9.76	48.35	-2.58	-2.02	-0.4	92.38	100	1.92	1.72	-2.62	14.69	21.93	0.99	0.93	-0.2	108.64	100	10.28	10.04	0	0	0	0	0	2	1	1	1	0	0	0	0	0	0	580	2523	281	0.55	-0.2	0.94	0.98
hSQ003863	NM_001032293	ZNF207	7756	0.82	9.76	48.41	-1.32	-0.75	0.31	84.11	100	1.73	1.84	-2.4	14.69	24.16	0.94	0.88	-0.25	108.64	100	7.93	7.71	2	0	0	0	0	0	0	0	0	0	0	0	0	0	0	690	1392	148	0.57	0.11	0.94	0.97
hSQ010758	NM_001357	DHX9	1660	0.82	9.76	48.41	-3.02	-2.17	-0.35	92.38	100	1.71	1.37	0.75	29.81	59.57	0.81	0.85	1.32	85.33	100	6.52	9.14	1	0	0	0	0	0	0	0	0	0	0	0	0	0	0	313	3813	163	0.85	-0.34	1.04	1.4
hSQ019373	NM_006353	HMGN4	10473	0.82	9.76	48.44	-1.16	-0.41	-0.33	92.38	100	0.76	0.52	1.25	26.28	53.99	0.79	0.85	-0.13	108.64	100	3.78	3.68	2	0	0	0	0	0	0	0	0	0	0	0	0	0	0	1455	273	238	0.75	-0.24	1.07	0.97
hSQ022943	NM_004521	KIF5B	3799	0.82	9.76	48.49	-2.14	-1.47	0.06	90.93	100	0.09	0.12	-0.73	19.17	51.05	0.97	0.94	0.28	108.17	100	7.86	8.1	0	0	0	0	0	0	1	0	0	0	0	0	0	0	0	394	2892	314	0.66	0.03	0.97	1.03
hSQ000268	NM_014900	COBLL1	22837	0.82	9.76	48.53	-0.07	0.89	-0.62	91.61	100	-1.03	-1.57	1.25	26.28	53.95	0.68	0.87	0.26	108.17	100	5.13	5.4	2	0	0	1	0	2	2	0	1	0	0	0	0	0	0	1196	3501	222	0.96	-0.53	1.28	1.05
hSQ018227	NM_000671	ADH5	128	0.82	9.76	48.62	-2.21	-1.59	-0.28	92.38	100	0.6	0.47	-1.64	14.69	34.96	0.95	0.9	0.63	108.17	100	7.12	7.81	1	1	1	0	0	2	0	0	0	0	0	0	0	0	0	1436	1125	80	0.62	-0.13	0.95	1.1
hSQ029879	NM_133329	KCNG3	170850	0.82	9.76	48.68	1.48	2.26	0.39	84.11	96.89	-0.54	-0.32	1.33	25.16	52.8	0.69	0.79	-0.22	108.64	100	5.73	5.52	0	0	0	0	0	0	1	0	0	0	0	0	0	0	0	1915	1311	596	0.79	0.22	1.14	0.96
hSQ031048	NM_006947	SRP72	6731	0.82	9.76	48.71	-3.05	-2.26	0.48	84.11	93.2	0.65	0.88	0.46	29.81	60.95	0.82	0.85	-0.11	108.64	100	6.06	5.96	1	0	0	0	0	2	0	0	1	0	NA	NA	NA	NA	NA	1819	2016	NA	0.79	0.23	1.04	0.98
hSQ032988	NM_003846	PEX11B	8799	0.82	9.76	48.74	1.78	2.34	-0.12	92.38	100	0.34	0.28	-2.03	14.69	28.89	0.92	0.89	0.18	108.17	100	4.66	4.79	1	1	0	0	0	0	0	0	0	0	NA	NA	NA	NA	NA	812	780	NA	0.56	-0.06	0.96	1.03
hSQ033820	NM_005700	DPP3	10072	0.82	9.76	48.75	-0.9	-0.18	0.47	84.11	93.37	0.36	0.56	0.87	28.63	58.5	0.71	0.85	-1.13	76.95	100	7.35	5.2	0	0	0	0	0	0	1	0	0	0	0	0	0	0	0	408	2214	62	0.72	0.2	1.19	0.71
hSQ017680	NM_020706	SFRS15	57466	0.82	9.76	48.8	-0.88	0.12	-0.21	92.38	100	0.5	0.32	1.19	26.68	54.77	0.78	0.9	-0.2	108.64	100	7.29	6.95	0	0	0	0	0	0	3	0	0	0	0	0	0	0	0	163	3444	257	1	-0.18	1.15	0.95
hSQ010144	NM_199414	PRC1	9055	0.82	9.76	48.81	-1.03	-0.44	-0.21	92.38	100	1.8	1.71	-2.58	14.69	22.28	0.96	0.9	-0.23	108.64	100	8.15	7.88	0	2	0	0	0	1	1	0	0	0	0	0	0	0	0	1131	1701	157	0.6	-0.09	0.94	0.97
hSQ043060	NA	KIF18B	146909	0.82	9.76	48.82	1.98	2.7	-0.48	92.38	100	0.52	0.29	-0.21	21.69	58.17	0.77	0.75	0.03	108.17	100	4.88	4.91	NA	NA	NA	NA	NA	NA	NA	NA	NA	NA	NA	NA	NA	NA	NA	NA	NA	NA	0.72	-0.23	0.98	1.01
hSQ019337	NM_001076680	LOC201229	201229	0.82	9.76	48.84	1.15	1.89	-0.13	92.38	100	-0.71	-0.78	1.36	25.16	52.34	0.6	0.83	0.6	108.17	100	2.35	2.74	1	2	0	0	0	0	0	0	0	0	0	0	0	0	0	1158	237	85	0.73	-0.08	1.38	1.17
hSQ007797	NM_002435	MPI	4351	0.82	9.76	48.91	1.72	2.37	-0.5	92.38	100	3.14	2.85	-2.1	14.69	27.89	0.96	0.92	0	108.17	100	7.19	7.19	0	0	0	0	0	0	2	0	0	0	NA	NA	NA	NA	NA	494	1272	NA	0.65	-0.29	0.96	1
hSQ002219	NM_153705	KDELC2	143888	0.82	9.76	48.92	-2.86	-2.16	-0.11	92.38	100	0.96	0.9	-0.75	19.17	50.71	0.92	0.9	0.11	108.17	100	5.32	5.4	0	0	0	0	0	0	0	0	0	0	0	0	0	0	0	2721	1524	66	0.7	-0.06	0.98	1.01
hSQ014996	NM_033115	MGC16169	93627	0.82	9.76	48.95	0.15	0.79	-0.18	92.38	100	-1	-1.07	0.75	29.81	59.55	0.71	0.77	0.28	108.17	100	5.27	5.5	0	0	0	0	0	3	1	1	1	1	0	0	0	0	0	487	2493	327	0.64	-0.07	1.09	1.04
hSQ011758	NM_021964	ZNF148	7707	0.82	9.76	48.97	-1.1	-0.33	0.72	74.83	83.07	-0.98	-0.6	0.61	29.81	60.39	0.83	0.87	0.62	108.17	100	5.98	6.3	2	0	0	1	0	1	0	0	0	0	0	0	0	0	0	6672	2385	486	0.77	0.38	1.05	1.05
hSQ035329	NM_004069	AP2S1	1175	0.82	9.76	48.97	-1.68	-0.95	0.12	90.93	100	1.82	1.88	-1.51	14.69	37.23	0.97	0.92	0.55	108.17	100	4.37	4.86	0	0	0	0	0	0	0	0	0	0	0	0	0	0	0	281	429	180	0.74	0.06	0.95	1.11
hSQ017301	NM_002140	HNRNPK	3190	0.82	9.76	49.01	-1.7	-1.09	-0.19	92.38	100	2.03	1.94	-1.67	14.69	34.49	0.98	0.93	-2.12	34.95	51.33	10.83	9.38	0	0	0	0	0	0	0	0	0	0	0	0	0	0	0	1230	1395	209	0.62	-0.09	0.95	0.87
hSQ038417	NM_032377	ELOF1	84337	0.82	9.76	49.02	-0.79	-0.27	0.56	84.11	89.82	1.91	2.14	-1.6	14.69	35.64	0.89	0.86	0.7	108.17	100	4.15	4.46	0	0	0	0	0	0	1	0	0	0	0	0	0	0	0	703	252	64	0.52	0.22	0.97	1.08
hSQ013666	NM_005881	BCKDK	10295	0.82	9.76	49.04	0.98	1.56	-0.07	92.38	100	1.19	1.14	-1.81	14.69	32.1	0.95	0.9	0.14	108.17	100	5.23	5.32	0	0	0	0	0	2	1	1	0	0	0	0	0	0	0	333	1239	230	0.58	-0.05	0.95	1.02
hSQ023706	NM_145048	C4orf28	133015	0.81	9.76	49.06	-2.56	-1.88	-0.46	92.38	100	0.97	0.75	-0.55	21.69	53.86	0.93	0.9	0.27	108.17	100	3.87	4.08	0	0	0	0	0	1	1	1	0	0	0	0	0	0	0	1009	666	138	0.68	-0.21	0.97	1.05
hSQ044930	NM_002061	GCLM	2730	0.81	9.76	49.07	-0.76	0.09	-0.01	92.38	100	0.39	0.38	-0.28	21.69	57.49	0.93	0.92	0.17	108.17	100	5.47	5.6	0	0	0	0	0	0	0	0	0	0	1	1	1	0	0	1956	825	293	0.85	0	0.99	1.02
hSQ003631	NM_001098817	C18orf37	125476	0.81	9.76	49.07	-0.72	-0.18	-3.11	1.6	0.51	3.05	1.75	-3.67	9.63	16.02	0.95	0.84	-1.63	37.98	76.93	5.98	5.25	1	1	1	0	0	2	2	1	0	0	0	0	0	0	0	284	687	117	0.54	-1.3	0.89	0.88
hSQ023654	NM_002154	HSPA4	3308	0.81	9.76	49.08	-2.09	-1.47	-0.33	92.38	100	2.31	2.13	-2.54	14.69	22.64	0.99	0.92	0.96	108.17	100	9.61	10.15	0	0	0	0	0	2	1	1	1	0	0	0	0	0	0	580	2523	281	0.61	-0.19	0.94	1.06
hSQ025038	NM_001017396	ZNF2	7549	0.81	9.76	49.31	2.65	3.34	0.04	90.93	100	1.34	1.36	2.26	21.69	36.09	0.56	0.69	0.18	108.17	100	4.3	4.43	3	1	1	1	0	1	0	0	0	0	0	0	0	0	0	2208	1155	516	0.69	0.02	1.24	1.03
hSQ014855	NA	mtRNA_ND5	repname(hSQ014855)	0.81	9.76	49.31	-1.18	-0.51	-0.13	92.38	100	0.47	0.39	1.5	23.79	50.06	0.42	0.58	-0.05	108.64	100	3.47	3.43	NA	NA	NA	NA	NA	NA	NA	NA	NA	NA	NA	NA	NA	NA	NA	NA	NA	NA	0.67	-0.08	1.39	0.99
hSQ006775	NM_000086	CLN3	1201	0.81	9.76	49.32	-1.25	-0.73	0.05	90.93	100	1.08	1.11	-1.43	14.69	38.58	0.87	0.82	-0.13	108.64	100	5.5	5.43	1	0	0	0	0	2	1	0	0	0	0	0	0	0	0	236	1317	323	0.53	0.03	0.94	0.99
hSQ033466	NM_002875	RAD51	5888	0.81	9.76	49.32	-0.8	-0.19	-1.94	5.14	26.46	0.68	-0.16	-2.38	14.69	24.36	0.95	0.88	-1.94	34.95	59.91	7	6.29	1	2	1	1	1	0	0	0	0	0	0	0	0	0	0	980	1020	267	0.6	-0.84	0.93	0.9
hSQ035413	NM_014709	USP34	9736	0.81	9.76	49.36	-0.49	0.13	0.37	84.11	97.39	-0.9	-0.68	-1.73	14.69	33.5	0.91	0.87	-0.37	108.64	100	5.95	5.7	0	0	0	0	0	5	3	1	0	0	NA	NA	NA	NA	NA	646	10641	NA	0.62	0.22	0.96	0.96
hSQ023170	NM_005431	XRCC2	7516	0.81	9.76	49.43	-1.07	-0.39	-0.36	92.38	100	2.65	2.41	0.52	29.81	60.78	0.68	0.74	-0.17	108.64	100	3.78	3.65	0	2	0	0	0	2	1	1	0	0	0	0	0	0	0	2138	843	86	0.68	-0.24	1.09	0.96
hSQ034429	NA	MGC22265::BC034017	349035::387036	0.81	9.76	49.48	-1.35	-0.82	0.21	90.93	100	-0.75	-0.64	0.36	29.81	61.07	0.7	0.72	-0.03	108.64	100	4.9	4.88	NA	NA	NA	NA	NA	NA	NA	NA	NA	NA	NA	NA	NA	NA	NA	NA	NA	NA	0.53	0.11	1.03	1
hSQ000320	NM_182975	ZNF326	284695	0.81	9.76	49.5	-1.73	-1.17	-0.41	92.38	100	2.7	2.47	-0.86	19.17	48.84	0.93	0.9	-0.06	108.64	100	8.22	8.14	0	0	0	0	0	0	0	0	0	0	0	0	0	0	0	1193	213	139	0.56	-0.23	0.96	0.99
hSQ039283	NM_002461	MVD	4597	0.81	9.76	49.54	-1.33	-0.7	-0.52	92.38	100	-0.17	-0.46	-0.73	19.17	51.03	0.83	0.8	-0.03	108.64	100	5.37	5.35	0	1	0	0	0	0	0	0	0	0	NA	NA	NA	NA	NA	585	1203	NA	0.63	-0.29	0.96	1
hSQ023725	NM_032290	ANKRD32	84250	0.81	9.76	49.61	-1.24	-0.46	-0.26	92.38	100	-1.8	-1.94	2.18	21.69	37.72	0.46	0.72	0.17	108.17	100	5.48	5.56	0	0	0	0	0	0	0	0	0	0	NA	NA	NA	NA	NA	554	1269	NA	0.78	-0.14	1.54	1.02
hSQ009472	NM_000462	UBE3A	7337	0.81	9.76	49.69	-2.58	-1.98	-0.12	92.38	100	0.12	0.06	-2.26	14.69	25.77	0.96	0.89	-0.13	108.64	100	6.45	6.36	2	3	2	0	0	1	0	0	0	0	NA	NA	NA	NA	NA	1887	2628	NA	0.6	-0.05	0.93	0.99
hSQ031643	NM_019067	GNL3L	54552	0.81	9.76	49.71	-2.35	-1.68	0.03	90.93	100	0.53	0.55	-0.39	21.69	56.17	0.96	0.94	-0.88	108.64	100	7.46	5.98	3	0	0	2	0	0	0	0	0	0	0	0	0	0	0	4938	1749	139	0.67	0.02	0.97	0.8
hSQ042601	NM_173517	VKORC1L1	154807	0.8	9.76	49.75	-1.11	-0.58	-0.11	92.38	100	0.88	0.83	1.14	26.68	55.55	0.77	0.82	0.55	108.17	100	3.96	4.29	0	0	0	0	0	0	0	0	0	0	0	0	0	0	0	512	531	102	0.53	-0.06	1.06	1.08
hSQ030212	NM_182533	C1orf86	199990	0.8	9.76	49.75	1.32	1.93	0.51	84.11	92.03	0.73	1	1.14	26.68	55.52	0.61	0.74	0.65	108.17	100	3.28	3.63	0	0	0	0	0	1	1	1	0	0	NA	NA	NA	NA	NA	160	543	NA	0.61	0.27	1.2	1.11
hSQ020487	NM_001014831	PAK4	10298	0.8	9.76	49.8	1.14	1.92	-0.67	90.93	100	0.91	0.66	-1.09	14.69	44.69	0.91	0.88	-0.08	108.64	100	5.48	5.42	0	0	0	0	0	1	1	1	0	0	0	0	0	0	0	827	1776	461	0.78	-0.25	0.97	0.99
hSQ044471	NM_003596	TPST1	8460	0.8	9.76	49.87	1.65	2.34	-1.37	15.82	65.74	-0.36	-0.88	0.43	29.81	61.01	0.85	0.87	-0.26	108.64	100	4.41	4.26	1	1	0	0	0	1	1	0	0	0	0	0	0	0	0	577	1113	297	0.69	-0.52	1.02	0.97
hSQ010802	NM_005796	NUTF2	10204	0.8	9.76	49.95	-1.19	-0.6	0.23	90.93	100	2.24	2.37	-1.37	14.69	39.65	0.98	0.94	-0.36	108.64	100	5.08	4.87	1	0	0	0	0	1	0	0	1	0	0	0	0	0	0	402	384	99	0.59	0.12	0.96	0.96
hSQ033446	NM_015484	SYF2	25949	0.8	9.76	49.97	-1.39	-0.77	0.2	90.93	100	0.82	0.92	-1.79	14.69	32.42	0.83	0.79	-0.75	108.64	100	6.63	6.19	1	0	0	0	0	1	1	1	0	0	0	0	0	0	0	988	732	55	0.62	0.09	0.96	0.93
hSQ003273	NM_014053	FLVCR	28982	0.8	9.76	49.98	0.4	1.04	0.04	90.93	100	0.88	0.9	-0.46	21.69	55.19	0.89	0.88	-0.45	108.64	100	6.53	6.26	0	0	0	0	0	2	2	1	0	0	0	0	0	0	0	122	1668	198	0.63	0.02	0.99	0.96
hSQ002856	NM_018428	UTP6	55813	0.8	9.76	49.98	-1.4	-0.74	0.38	84.11	97.14	1.49	1.69	-1.9	14.69	30.8	0.95	0.9	0.41	108.17	100	8.1	8.56	0	0	0	0	0	0	1	0	0	0	0	0	0	0	0	187	1794	83	0.65	0.2	0.95	1.06
hSQ021646	NM_001006612	WBP5	51186	0.8	9.76	49.99	-2	-1.4	-0.14	92.38	100	2.48	2.41	-2.76	14.69	20.67	0.92	0.87	-0.41	108.64	100	5.31	4.94	0	0	0	0	0	0	0	0	0	0	0	0	0	0	0	468	315	301	0.59	-0.07	0.95	0.93
hSQ034559	NM_018130	SHQ1	55164	0.8	9.76	49.99	-0.47	0.06	-1.45	13.85	59.88	2.33	1.81	-1.69	14.69	34.02	0.97	0.93	-0.81	108.64	100	8.12	7.43	0	0	0	0	0	1	1	1	0	0	0	0	0	0	0	1005	1734	107	0.53	-0.52	0.96	0.91
hSQ032341	NM_006510	TRIM27	5987	0.8	9.76	50	-0.09	0.57	0.09	90.93	100	1.35	1.4	-1.84	14.69	31.72	0.93	0.87	0.08	108.17	100	6.27	6.31	2	0	0	0	0	0	3	0	0	0	0	1	0	0	0	1067	1542	359	0.66	0.04	0.93	1.01
hSQ002660	NM_013438	UBQLN1	29979	0.8	9.76	50	-2.43	-1.85	0.25	90.93	100	1	1.12	-2.06	14.69	28.37	0.94	0.88	-0.38	108.64	100	7.64	7.38	0	0	0	0	0	0	1	0	0	0	0	0	0	0	0	1823	1770	359	0.58	0.12	0.94	0.96
hSQ013071	NM_001960	EEF1D	1936	0.8	9.76	50	-0.78	-0.16	0.66	74.83	85.49	1.58	1.93	-2.39	14.69	24.28	0.92	0.84	1.31	85.33	100	7.98	9	0	0	0	0	0	0	1	0	0	0	0	0	0	0	0	64	846	73	0.62	0.35	0.92	1.13
hSQ045521	NM_003757	EIF3I	8668	0.8	9.76	50.01	-0.87	-0.19	-0.52	92.38	100	2.47	2.23	-2.48	14.69	23.32	0.97	0.9	0.28	108.17	100	8.09	8.39	0	0	0	0	0	1	0	0	0	0	0	0	0	0	0	407	978	72	0.68	-0.24	0.93	1.04
hSQ019048	NM_018301	RBM41	55285	0.8	9.76	50.12	-2.01	-1.46	0.21	90.93	100	1.79	1.89	1.35	25.16	52.4	0.65	0.74	0.31	108.17	100	4.7	4.89	0	0	0	0	0	0	0	0	0	0	NA	NA	NA	NA	NA	386	1242	NA	0.55	0.1	1.14	1.04
hSQ015949	NM_012477	WBP1	23559	0.8	9.76	50.12	0.84	1.49	-0.01	92.38	100	0.12	0.12	1.07	27.27	56.37	0.67	0.76	0.43	108.17	100	2.97	3.24	0	0	0	0	0	0	0	0	0	0	0	0	0	0	0	202	810	153	0.65	0	1.14	1.09
hSQ035946	NM_005698	SCAMP3	10067	0.8	9.76	50.13	-0.43	0.07	0.34	84.11	98.61	1.79	1.97	-1.03	14.69	45.82	0.93	0.9	0.65	108.17	100	6.43	6.81	0	0	0	0	0	1	0	0	0	0	0	0	0	0	0	293	1044	253	0.5	0.19	0.97	1.06
hSQ008446	NA	RNU36C	26813	0.8	9.76	50.13	-2.3	-1.71	-0.27	92.38	100	0.15	0.01	0.35	29.81	61.08	0.49	0.55	0.18	108.17	100	2.22	2.33	NA	NA	NA	NA	NA	NA	NA	NA	NA	NA	NA	NA	NA	NA	NA	NA	NA	NA	0.59	-0.14	1.11	1.05
hSQ020998	NM_013995	LAMP2	3920	0.8	9.76	50.17	-2.07	-1.54	-0.48	92.38	100	1.09	0.84	-1.25	14.69	41.87	0.97	0.94	-0.21	108.64	100	8.28	8.13	1	1	0	0	0	1	0	0	0	0	0	0	0	0	0	2635	1233	137	0.54	-0.26	0.97	0.98
hSQ011942	NM_138340	ABHD3	171586	0.8	9.76	50.18	-1.28	-0.65	0.08	90.93	100	-0.16	-0.13	-0.97	14.69	46.85	0.9	0.84	0.34	108.17	100	5.44	5.69	1	0	0	1	0	2	0	0	0	0	0	0	0	0	0	694	1230	100	0.63	0.03	0.94	1.05
hSQ036007	NA	LOC441243	441243	0.8	9.76	50.21	-2.2	-1.44	0.15	90.93	100	0.24	0.3	-0.48	21.69	54.91	0.87	0.84	-0.54	108.64	100	7.58	7.07	NA	NA	NA	NA	NA	NA	NA	NA	NA	NA	NA	NA	NA	NA	NA	NA	NA	NA	0.75	0.06	0.97	0.93
hSQ030533	NA	SEC11L2	157708	0.8	9.76	50.22	-0.49	0.11	-0.54	92.38	100	1.75	1.44	-3.44	9.63	16.75	0.88	0.75	-1.56	44.12	80.72	6.68	5.69	NA	NA	NA	NA	NA	NA	NA	NA	NA	NA	NA	NA	NA	NA	NA	NA	NA	NA	0.6	-0.31	0.85	0.85
hSQ015322	NM_176792	MRPL43	84545	0.8	9.76	50.27	-0.34	0.22	0.45	84.11	94.33	1.82	2.01	-1.11	14.69	44.37	0.95	0.92	0.94	108.17	100	5.42	6.03	0	1	0	0	0	0	0	0	0	0	0	0	0	0	0	1431	648	72	0.56	0.19	0.97	1.11
hSQ009135	NM_004860	FXR2	9513	0.8	9.76	50.32	-0.82	-0.12	-0.67	90.93	100	0.99	0.72	-1.57	14.69	36.11	0.91	0.88	-0.3	108.64	100	7.59	7.37	1	1	1	0	0	0	0	0	0	0	0	0	0	0	0	600	2023	221	0.7	-0.27	0.97	0.97
hSQ009187	NM_015092	SMG1	23049	0.8	9.76	50.36	-1.44	-0.91	0.33	84.11	99.05	0.01	0.15	1.04	27.27	56.75	0.71	0.77	0.41	108.17	100	3.47	3.69	1	1	0	0	0	1	0	0	1	0	NA	NA	NA	NA	NA	4715	10986	NA	0.53	0.14	1.08	1.06
hSQ000704	NM_018120	ARMC1	55156	0.8	9.76	50.37	-1.28	-0.71	-1.16	30.1	82.28	0.6	0.01	-2.01	14.69	29.16	0.94	0.87	-0.89	108.64	100	5.26	4.58	1	1	1	0	0	0	0	0	0	0	0	0	0	0	0	1553	849	235	0.57	-0.59	0.92	0.87
hSQ017659	NM_025232	REEP4	80346	0.8	9.76	50.38	2.64	3.34	0.14	90.93	100	1.1	1.2	-1.58	14.69	35.96	0.92	0.9	0.7	108.17	100	6.92	7.54	1	0	0	0	0	0	0	0	0	0	0	0	0	0	0	467	774	453	0.71	0.1	0.97	1.09
hSQ011961	NA	ncRNA_R38a_0	repname(hSQ011961)	0.8	9.76	50.39	-2.91	-2.04	0.41	84.11	96.01	2.27	2.49	1.67	22.99	47.18	0.13	0.25	-0.28	108.64	100	2.27	2.06	NA	NA	NA	NA	NA	NA	NA	NA	NA	NA	NA	NA	NA	NA	NA	NA	NA	NA	0.87	0.22	1.94	0.91
hSQ009020	NM_006628	ARPP-19	10776	0.79	9.76	50.43	-0.04	0.73	-0.42	92.38	100	-0.93	-1.13	0.41	29.81	61.03	0.78	0.82	-0.27	108.64	100	3.25	3.14	2	1	0	0	0	0	0	0	0	0	0	0	0	0	0	4699	339	124	0.78	-0.2	1.05	0.96
hSQ015085	NM_032286	MED10	84246	0.79	9.76	50.43	-0.83	-0.19	0.02	90.93	100	0.72	0.72	-1.36	14.69	39.85	0.88	0.84	-0.16	108.64	100	4.33	4.25	0	0	0	0	0	0	1	0	0	0	NA	NA	NA	NA	NA	576	408	NA	0.64	0.01	0.95	0.98
hSQ006808	NM_017975	ZWILCH	55055	0.79	9.76	50.44	-1.42	-0.81	0.3	84.11	100	0.94	1.11	-0.74	19.17	50.85	0.93	0.91	-0.34	108.64	100	5.59	5.42	0	0	0	0	0	3	1	1	0	0	0	0	0	0	0	1154	1776	246	0.6	0.17	0.98	0.97
hSQ022022	NM_000262	NAGA	4668	0.79	9.76	50.45	0.23	0.88	-0.18	92.38	100	-0.97	-1.06	-1.31	14.69	40.65	0.93	0.89	-0.83	108.64	100	5.99	5.49	1	2	0	0	0	1	0	0	1	0	1	0	0	0	0	1898	1236	472	0.65	-0.1	0.96	0.92
hSQ024284	NM_001535	PRMT2	3275	0.79	9.76	50.48	1.18	1.79	-0.09	92.38	100	0.15	0.09	0.83	29.12	58.91	0.8	0.85	0.31	108.17	100	3.38	3.58	0	0	0	0	0	0	0	0	0	0	0	0	0	0	0	623	1302	205	0.61	-0.05	1.07	1.06
hSQ045459	NM_001357	DHX9	1660	0.79	9.76	50.49	-2.55	-1.89	-0.49	92.38	100	1.56	1.23	-0.15	21.69	58.76	0.81	0.79	1.07	108.17	100	7.32	8.45	1	0	0	0	0	0	0	0	0	0	0	0	0	0	0	313	3813	163	0.66	-0.33	0.98	1.15
hSQ016920	NA	LOC341784	341784	0.79	9.76	50.49	-0.95	-0.28	0.62	84.11	87.3	2.47	2.83	-1.85	14.69	31.57	0.98	0.93	-0.01	108.64	100	10.22	10.21	NA	NA	NA	NA	NA	NA	NA	NA	NA	NA	NA	NA	NA	NA	NA	NA	NA	NA	0.67	0.36	0.94	1
hSQ034635	NM_001688	ATP5F1	515	0.79	9.76	50.49	1.4	2.66	-0.32	92.38	100	3.07	2.86	-1.29	14.69	41.15	1	0.96	-0.08	108.64	100	10	9.89	2	0	0	0	0	0	0	0	0	0	0	0	0	0	0	907	771	421	1.26	-0.21	0.97	0.99
hSQ038127	NM_020195	C14orf124	56948	0.79	9.76	50.54	-1.57	-1.03	-0.31	92.38	100	2.24	2.09	-1.29	14.69	41.16	0.86	0.82	0.5	108.17	100	4.41	4.72	0	0	0	0	0	1	0	0	1	0	NA	NA	NA	NA	NA	315	882	NA	0.54	-0.15	0.96	1.07
hSQ031609	NM_024567	HMBOX1	79618	0.79	9.76	50.6	0.25	0.99	-0.28	92.38	100	-0.91	-1.04	-1.87	14.69	31.25	0.97	0.93	-0.76	108.64	100	4.92	4.42	2	1	0	0	0	1	1	0	0	0	0	0	0	0	0	743	1263	400	0.74	-0.13	0.95	0.9
hSQ028542	NM_015548	DST	667	0.79	9.76	50.61	0.12	0.74	-0.03	92.38	100	-3.23	-3.25	1.44	25.16	51.04	0.67	0.81	-0.3	108.64	100	4.99	4.81	0	0	0	0	0	5	2	2	1	0	0	0	0	0	0	1018	15516	108	0.63	-0.02	1.2	0.96
hSQ000142	NA	C10orf75	90271	0.79	9.76	50.63	-1.99	-0.94	-0.37	92.38	100	0.27	0.09	-0.94	14.69	47.5	0.85	0.82	-0.42	108.64	100	3.65	3.44	NA	NA	NA	NA	NA	NA	NA	NA	NA	NA	NA	NA	NA	NA	NA	NA	NA	NA	1.05	-0.18	0.96	0.94
hSQ007175	NM_002267	KPNA3	3839	0.79	9.76	50.66	2.77	3.55	-0.9	58.83	100	0.89	0.44	1.31	26.28	53.04	0.85	0.9	-0.1	108.64	100	7.6	7.51	1	1	1	0	0	0	0	0	0	0	0	0	0	0	0	2474	1566	415	0.78	-0.45	1.05	0.99
hSQ000323	NM_031866	FZD8	8325	0.79	9.76	50.73	1.36	1.92	0.19	90.93	100	0.14	0.23	0.53	29.81	60.74	0.84	0.87	-0.66	108.64	100	7.5	7	1	0	0	1	0	0	2	0	0	0	NA	NA	NA	NA	NA	1096	2085	NA	0.57	0.09	1.03	0.93
hSQ018909	NM_033222	PSIP1	11168	0.79	9.76	50.74	-2.46	-1.97	0.2	90.93	100	-0.35	-0.22	-2.47	14.69	23.39	0.98	0.91	-0.11	108.64	100	7.86	7.72	0	0	0	0	0	0	0	0	0	0	0	0	0	0	0	1452	1593	309	0.5	0.13	0.92	0.98
hSQ007415	NM_018298	MCOLN3	55283	0.79	9.76	50.77	0.39	1.12	0.96	65.69	72.53	1.54	1.96	-0.08	21.69	59.43	0.85	0.84	0.47	108.17	100	3.3	3.55	0	0	0	0	0	2	1	1	0	0	0	0	0	0	0	1040	1662	93	0.73	0.42	0.99	1.08
hSQ028384	NM_001046	SLC12A2	6558	0.79	9.76	50.77	-1.74	-1.14	-0.99	43.3	94.11	0.23	-0.38	-1.06	14.69	45.25	0.91	0.88	-1.28	59.85	95.51	7.38	6.64	2	2	1	0	0	1	1	1	0	0	0	0	0	0	0	3056	3639	164	0.59	-0.61	0.96	0.9
hSQ022865	NM_012425	RSU1	6251	0.79	9.76	50.82	-4.04	-2.02	-0.53	92.38	100	0.96	0.71	0.48	29.81	60.91	0.85	0.87	0	108.17	100	6.18	6.18	0	0	0	0	0	0	0	0	0	0	0	0	0	0	0	2774	834	143	2.01	-0.25	1.03	1
hSQ025127	NM_016649	ESF1	51575	0.79	9.76	50.92	-2.8	-2.18	0.73	74.83	82.78	1.94	2.3	0.13	29.81	60.64	0.81	0.82	0.28	108.17	100	7.08	7.32	0	0	0	0	0	0	0	0	0	0	0	0	0	0	0	551	2556	108	0.62	0.36	1.02	1.03
hSQ001291	NM_020918	GPAM	57678	0.79	9.76	50.95	-0.85	-0.07	0.52	84.11	91.44	0.15	0.49	0.21	29.81	60.92	0.89	0.9	-0.26	108.64	100	7.11	6.92	2	3	2	0	0	1	0	0	0	0	0	0	0	0	0	3686	2487	195	0.78	0.34	1.01	0.97
hSQ025189	NM_003564	TAGLN2	8407	0.79	9.76	51.02	-0.53	-0.06	0.49	84.11	92.85	1.15	1.35	-1.67	14.69	34.49	0.99	0.95	0.45	108.17	100	7.56	7.89	1	1	0	0	0	0	0	0	0	0	1	0	0	0	0	687	600	73	0.47	0.2	0.96	1.04
hSQ022813	NM_002154	HSPA4	3308	0.79	15.69	51.05	-1.87	-1.3	-0.33	92.38	100	1.95	1.78	-2.28	14.69	25.59	0.99	0.93	0.15	108.17	100	11.11	11.23	0	0	0	0	0	2	1	1	1	0	0	0	0	0	0	580	2523	281	0.57	-0.17	0.94	1.01
hSQ013220	NM_203301	FBXO33	254170	0.79	15.69	51.05	1.98	2.58	-1.26	21.42	74.57	1.31	0.76	-0.78	19.17	50.25	0.92	0.89	0.8	108.17	100	5.74	6.23	1	0	0	0	0	2	2	1	0	0	1	0	0	0	0	1756	1668	254	0.6	-0.55	0.97	1.09
hSQ043075	NM_005595	NFIA	4774	0.78	15.69	51.07	2.31	3.18	0.4	84.11	96.49	-0.23	-0.07	-1.66	14.69	34.6	0.94	0.88	-1.92	34.95	60.69	4.92	4.15	0	0	0	0	0	0	1	0	0	0	0	0	0	0	0	978	1497	169	0.87	0.15	0.93	0.84
hSQ024478	NA	LOC440000	440000	0.78	15.69	51.1	0.88	1.6	-0.55	92.38	100	0.24	-0.03	0	29.81	59.97	0.8	0.8	0.03	108.17	100	3.89	3.92	NA	NA	NA	NA	NA	NA	NA	NA	NA	NA	NA	NA	NA	NA	NA	NA	NA	NA	0.72	-0.27	1	1.01
hSQ015236	NM_016359	NUSAP1	51203	0.78	15.69	51.11	-1.58	-1.06	-0.26	92.38	100	1.07	0.95	-1.58	14.69	35.89	0.93	0.86	0.58	108.17	100	6.71	7.16	0	0	0	0	0	0	0	0	0	0	0	0	0	0	0	861	681	732	0.52	-0.12	0.93	1.07
hSQ003556	NM_001080424	JMJD3	23135	0.78	15.69	51.12	0.39	1.44	0.19	90.93	100	-0.59	-0.51	-0.46	21.69	55.25	0.87	0.84	-0.58	108.64	100	5.51	5.23	0	0	0	0	0	2	2	1	1	1	0	0	0	0	0	1279	5049	376	1.05	0.08	0.97	0.95
hSQ018873	NM_001003800	BICD2	23299	0.78	15.69	51.13	-1.85	-1.01	-0.94	52.46	97.62	0.63	0.13	-1.07	14.69	45.11	0.94	0.89	-0.47	108.64	100	6.12	5.85	4	2	1	0	0	0	1	0	0	0	0	0	0	0	0	3790	2568	57	0.83	-0.49	0.95	0.96
hSQ020732	NM_005671	UBXD6	7993	0.78	15.69	51.23	-1.64	-1.07	0.18	90.93	100	2.31	2.39	-0.29	21.69	57.29	0.79	0.77	0.66	108.17	100	4.95	5.46	1	0	0	0	0	0	0	0	0	0	NA	NA	NA	NA	NA	608	812	NA	0.57	0.08	0.98	1.1
hSQ031653	NA	C6orf70	55780	0.78	15.69	51.23	0.73	1.49	-0.04	92.38	100	-0.01	-0.03	1.57	23.79	48.95	0.68	0.8	0.57	108.17	100	4.41	4.66	NA	NA	NA	NA	NA	NA	NA	NA	NA	NA	NA	NA	NA	NA	NA	NA	NA	NA	0.77	-0.02	1.17	1.06
hSQ041502	NM_001039366	ATP6V1E1	529	0.78	15.69	51.27	1.14	1.8	0.72	74.83	83.01	2.12	2.41	-1.69	14.69	34.13	0.95	0.91	0.29	108.17	100	7.93	8.11	1	0	0	0	0	0	0	0	0	0	0	0	0	0	0	537	615	187	0.66	0.29	0.96	1.02
hSQ029462	NM_006517	SLC16A2	6567	0.78	15.69	51.31	2.12	2.77	-0.08	92.38	100	-0.43	-0.49	0.26	29.81	61.01	0.85	0.86	0.49	108.17	100	6.56	6.83	1	0	0	0	0	0	0	0	0	0	0	0	0	0	0	2355	1842	166	0.65	-0.06	1.01	1.04
hSQ016586	NA	XM_499083	441281	0.78	15.69	51.34	1.53	2.3	-0.52	92.38	100	3.54	3.23	1.14	26.68	55.46	0.8	0.88	0.44	108.17	100	3.29	3.62	NA	NA	NA	NA	NA	NA	NA	NA	NA	NA	NA	NA	NA	NA	NA	NA	NA	NA	0.77	-0.32	1.1	1.1
hSQ007416	NM_002726	PREP	5550	0.78	15.69	51.38	0.07	0.69	0.13	90.93	100	0.61	0.66	-0.79	19.17	50.03	0.96	0.94	0.12	108.17	100	10.38	10.52	0	0	0	0	0	0	1	0	0	0	0	0	0	0	0	511	2133	203	0.63	0.05	0.98	1.01
hSQ043710	NM_138426	GLCCI1	113263	0.78	15.69	51.38	-0.38	0.37	-0.24	92.38	100	-1.02	-1.13	0.54	29.81	60.71	0.84	0.87	0.13	108.17	100	5.47	5.58	1	1	0	0	0	0	0	0	0	0	0	0	0	0	0	2539	1644	559	0.75	-0.11	1.04	1.02
hSQ012497	NM_001100620	TROAP	10024	0.78	15.69	51.41	0.77	1.39	0.17	90.93	100	1.67	1.77	0.45	29.81	60.97	0.72	0.75	-0.06	108.64	100	4.59	4.54	0	0	0	0	0	0	0	0	0	0	0	0	0	0	0	136	435	167	0.63	0.11	1.04	0.99
hSQ041475	NM_014948	UBOX5	22888	0.78	15.69	51.44	1.73	2.29	-0.07	92.38	100	0.31	0.27	0.17	29.81	60.81	0.86	0.86	0.79	108.17	100	5.43	5.75	1	3	0	0	0	2	2	0	0	0	0	0	0	0	0	2532	1626	170	0.56	-0.04	1.01	1.06
hSQ039946	NM_012463	ATP6V0A2	23545	0.78	15.69	51.49	-1.39	-0.55	-0.12	92.38	100	0.68	0.57	0.85	29.12	58.72	0.81	0.88	0.47	108.17	100	5.63	6.09	1	0	0	1	0	0	3	0	0	0	0	0	0	0	0	1859	2571	248	0.84	-0.11	1.1	1.08
hSQ023385	NM_005809	PRDX2	7001	0.78	15.69	51.5	-0.44	0.19	-0.09	92.38	100	2.36	2.31	-1.59	14.69	35.77	1	0.96	-0.08	108.64	100	8.53	8.4	0	1	0	0	0	0	0	0	0	0	0	0	0	0	0	260	597	150	0.64	-0.05	0.96	0.98
hSQ021807	NM_001076680	LOC201229	201229	0.78	15.69	51.53	1.24	1.9	-0.03	92.38	100	-0.7	-0.72	1.28	26.28	53.54	0.62	0.84	0.46	108.17	100	2.49	2.76	1	2	0	0	0	0	0	0	0	0	0	0	0	0	0	1158	237	85	0.66	-0.02	1.34	1.11
hSQ006472	NM_144724	MARVELD2	153562	0.78	15.69	51.54	-0.35	0.25	-0.14	92.38	100	-0.31	-0.38	0.48	29.81	60.91	0.81	0.83	-0.92	108.64	100	5.6	5.08	1	0	0	1	0	1	0	0	0	0	0	0	0	0	0	942	1374	70	0.61	-0.07	1.03	0.91
hSQ009880	NM_001002837	PIB5PA	27124	0.78	15.69	51.54	0.64	1.24	0.1	90.93	100	2.63	2.68	1.23	26.28	54.24	0.75	0.82	0	108.64	100	5.14	5.13	0	0	0	0	0	2	1	0	0	0	NA	NA	NA	NA	NA	277	1917	NA	0.6	0.05	1.09	1
hSQ003897	NM_138493	C6orf129	154467	0.78	15.69	51.54	-1.49	-0.93	0.09	90.93	100	2.65	2.71	-0.07	21.69	59.45	0.88	0.88	0.51	108.17	100	3.08	3.37	0	0	0	0	0	0	0	0	0	0	0	0	0	0	0	263	294	61	0.56	0.06	1	1.09
hSQ033130	NM_000026	ADSL	158	0.78	15.69	51.6	1.18	1.72	0.17	90.93	100	2.83	2.94	-1.42	14.69	38.77	0.99	0.95	0.99	108.17	100	7.73	8.44	1	0	0	1	0	1	1	0	0	0	NA	NA	NA	NA	NA	225	1455	NA	0.54	0.11	0.96	1.09
hSQ025396	NM_024303	ZSCAN5	79149	0.78	15.69	51.64	-1.77	-0.75	-0.02	92.38	100	0.64	0.63	1.14	26.68	55.54	0.86	0.87	-0.76	108.64	100	5.04	4.54	1	0	0	0	0	0	0	0	0	0	0	0	0	0	0	263	1491	166	1.01	-0.01	1.02	0.9
hSQ005092	NM_001098477	GRSF1	2926	0.78	15.69	51.64	-0.95	-0.49	0.09	90.93	100	1.92	1.96	-1.5	14.69	37.32	0.93	0.88	0.88	108.17	100	6.2	6.69	4	2	1	0	0	2	0	0	2	0	0	0	0	0	0	5105	957	405	0.47	0.04	0.95	1.08
hSQ008332	NM_005245	FAT	2195	0.78	15.69	51.72	-0.55	0.18	0.57	84.11	89.33	-3.08	-2.75	-0.04	21.69	59.67	0.89	0.89	-0.96	108.63	100	6.96	6.34	0	1	0	0	0	1	5	1	0	0	0	0	0	0	0	808	13767	188	0.73	0.34	1	0.91
hSQ017884	NA	TRNK::ND4	4566::4538	0.77	15.69	51.75	0.61	1.28	0.73	74.83	82.78	2.08	2.54	-0.92	14.69	47.88	0.8	0.66	-0.17	108.64	100	4.45	4.21	NA	NA	NA	NA	NA	NA	NA	NA	NA	NA	NA	NA	NA	NA	NA	NA	NA	NA	0.67	0.46	0.82	0.95
hSQ030682	NM_153023	SPATA13	221178	0.77	15.69	51.78	1.37	1.86	-0.29	92.38	100	-2.12	-2.27	-1.6	14.69	35.58	0.95	0.91	-0.26	108.64	100	4.7	4.57	1	1	0	0	0	2	0	0	1	0	0	0	0	0	0	1137	1959	407	0.49	-0.15	0.96	0.97
hSQ038752	NM_006372	SYNCRIP	10492	0.77	15.69	51.81	-2.02	-1.5	-0.19	92.38	100	1.87	1.78	-1.04	14.69	45.69	0.93	0.89	-2.28	34.95	44.92	9.58	8.35	0	0	0	0	0	1	1	1	0	0	0	1	0	0	0	535	1872	525	0.52	-0.09	0.96	0.87
hSQ034688	NM_015975	TAF9B	51616	0.77	15.69	51.81	-0.35	0.22	-0.16	92.38	100	2.6	2.52	0.7	29.81	59.9	0.88	0.9	0.13	108.17	100	6.24	6.36	1	0	0	0	0	1	0	0	0	0	0	0	0	0	0	1861	756	71	0.57	-0.08	1.02	1.02
hSQ008963	NM_005700	DPP3	10072	0.77	15.69	51.81	-1.89	-1.22	-0.26	92.38	100	0.82	0.72	-0.49	21.69	54.85	0.89	0.87	-0.06	108.64	100	8.25	8.18	0	0	0	0	0	0	1	0	0	0	0	0	0	0	0	408	2214	62	0.66	-0.1	0.98	0.99
hSQ039086	NM_145214	TRIM11	81559	0.77	15.69	51.83	1.77	2.34	-0.16	92.38	100	3.03	2.93	-1.94	14.69	30.16	0.95	0.89	0.27	108.17	100	7.19	7.4	1	2	1	0	0	0	1	0	0	0	0	0	0	0	0	1029	1407	255	0.57	-0.11	0.95	1.03
hSQ005903	NM_000270	NP	4860	0.77	15.69	51.84	0.74	1.24	-0.28	92.38	100	2.54	2.41	-2.17	14.69	26.89	0.95	0.92	-0.41	108.64	100	9.02	8.74	2	1	0	1	0	0	0	0	0	0	0	0	0	0	0	488	870	142	0.5	-0.13	0.96	0.97
hSQ009372	NM_007280	OIP5	11339	0.77	15.69	51.86	-0.81	-0.35	0.26	90.93	100	1.02	1.15	-2.34	14.69	24.82	0.98	0.93	0.57	108.17	100	4.06	4.34	1	0	0	1	0	2	0	0	0	0	0	0	0	0	0	484	690	60	0.47	0.13	0.95	1.07
hSQ011539	NM_004172	SLC1A3	6507	0.77	15.69	51.88	0.6	1.22	-0.09	92.38	100	2.3	2.26	1.62	22.99	48.04	0.81	0.85	-0.32	108.64	100	8.79	8.54	0	0	0	0	0	1	1	0	0	0	0	0	0	0	0	2063	1629	242	0.62	-0.04	1.05	0.97
hSQ009534	NM_173474	NTAN1	123803	0.77	15.69	51.98	0.82	1.3	0.54	84.11	90.47	-0.35	-0.1	2.27	21.69	35.92	0.25	0.45	0.24	108.17	100	2.9	3.03	0	0	0	0	0	0	0	0	0	0	NA	NA	NA	NA	NA	171	933	NA	0.48	0.26	1.78	1.04
hSQ034762	NM_005402	RALA	5898	0.77	15.69	51.98	-1.66	-1.17	-0.78	74.83	100	0.57	0.28	-0.79	19.17	50.1	0.91	0.88	-0.05	108.64	100	5.68	5.65	2	0	0	1	0	0	0	0	0	0	0	0	0	0	0	1871	621	300	0.49	-0.29	0.97	0.99
hSQ038004	NM_004427	PHC2	1912	0.77	15.69	52.02	0.97	1.71	-0.05	92.38	100	-0.02	-0.04	0.75	29.81	59.56	0.85	0.88	0.42	108.17	100	4.08	4.42	1	1	0	0	0	0	0	0	0	0	0	0	0	0	0	1242	972	352	0.74	-0.02	1.03	1.08
hSQ034942	NM_020910	KIAA1549	57670	0.77	15.69	52.07	-0.22	0.38	0.09	90.93	100	0.16	0.2	0.09	29.81	60.49	0.85	0.86	-0.59	108.64	100	5.69	5.41	2	0	0	0	0	3	2	1	0	0	0	0	0	0	0	6524	5655	349	0.59	0.04	1.01	0.95
hSQ005989	NM_015012	TMEM41B	440026	0.77	15.69	52.09	-0.49	0.15	-0.04	92.38	100	0.04	0.02	-0.48	21.69	54.89	0.9	0.89	0.35	108.17	100	6.27	6.56	0	0	0	0	0	0	1	0	0	0	0	0	0	0	0	438	876	308	0.64	-0.02	0.99	1.05
hSQ004969	NM_002918	RFX1	5989	0.77	15.69	52.09	2.54	3.46	-1.08	35.24	87.83	-0.39	-0.84	1.12	26.68	55.72	0.67	0.8	-2.31	34.95	44.01	6.1	4.79	1	1	1	1	1	1	2	1	0	0	0	0	0	0	0	1154	2940	235	0.91	-0.45	1.19	0.79
hSQ022733	NA	ncRNA_U22_7	repname(hSQ022733)	0.77	15.69	52.11	-1.46	-0.86	-0.1	92.38	100	0.07	0.02	-0.76	19.17	50.52	0.78	0.71	-0.3	108.64	100	2.82	2.65	NA	NA	NA	NA	NA	NA	NA	NA	NA	NA	NA	NA	NA	NA	NA	NA	NA	NA	0.6	-0.05	0.91	0.94
hSQ019658	NM_007098	CLTCL1	8218	0.77	15.69	52.12	1.97	2.57	0	90.93	100	0.92	0.92	0.63	29.81	60.33	0.66	0.75	0.38	108.17	100	4.58	4.81	0	0	0	0	0	4	0	0	0	0	0	0	0	0	0	514	4923	75	0.6	0	1.13	1.05
hSQ025366	NM_004768	SFRS11	9295	0.77	15.69	52.12	-1.39	-0.79	0.59	84.11	88.6	2.18	2.45	-2.27	14.69	25.6	0.86	0.82	-0.11	108.64	100	6.57	6.51	0	0	0	0	0	0	0	0	0	0	0	0	0	0	0	1195	1455	124	0.6	0.27	0.95	0.99
hSQ005883	NM_014791	MELK	9833	0.77	15.69	52.13	-3.51	-1.9	-0.44	92.38	100	1.84	1.57	-1.19	14.69	42.91	0.93	0.89	0.43	108.17	100	4.97	5.39	0	0	0	0	0	0	1	0	0	0	0	0	0	0	0	344	1956	138	1.61	-0.27	0.95	1.09
hSQ034520	NM_014720	SLK	9748	0.77	15.69	52.14	-1.63	-1.06	-0.16	92.38	100	0.92	0.83	-1.85	14.69	31.49	0.97	0.93	-0.39	108.64	100	8.28	7.97	0	1	0	0	0	2	1	0	1	0	NA	NA	NA	NA	NA	1864	3708	NA	0.57	-0.08	0.96	0.96
hSQ018797	NM_004427	PHC2	1912	0.77	15.69	52.17	1.02	1.71	0.03	90.93	100	0.08	0.09	1.19	26.68	54.83	0.84	0.89	0.32	108.17	100	4.19	4.43	1	1	0	0	0	0	0	0	0	0	0	0	0	0	0	1242	972	352	0.7	0.01	1.06	1.06
hSQ001051	NM_015391	ANAPC13	25847	0.77	15.69	52.18	-0.1	0.49	0.58	84.11	88.88	1.27	1.63	-0.48	21.69	54.91	0.93	0.91	-0.37	108.64	100	4.18	3.94	0	0	0	0	0	1	0	0	1	0	0	0	0	0	0	882	225	63	0.59	0.37	0.98	0.94
hSQ009704	NM_014573	TMEM97	27346	0.77	15.69	52.2	-0.76	-0.2	-0.3	92.38	100	1.48	1.32	0.04	29.81	60.2	0.72	0.73	-0.15	108.64	100	4.33	4.23	1	1	0	0	0	2	0	0	0	0	0	0	0	0	0	1891	531	145	0.56	-0.16	1.01	0.98
hSQ000624	NM_032731	TXNDC17	84817	0.77	15.69	52.24	1.27	2.1	0.06	90.93	100	2.03	2.06	-0.96	14.69	47.18	0.98	0.95	0.48	108.17	100	4.37	4.74	1	2	1	1	1	0	1	0	0	0	0	0	0	0	0	1522	372	181	0.83	0.02	0.97	1.08
hSQ031789	NM_004290	RNF14	9604	0.77	15.69	52.26	-1.65	-1.11	-0.45	92.38	100	1.93	1.77	-0.21	21.69	58.23	0.83	0.82	-0.78	108.64	100	4.95	4.56	0	0	0	0	0	1	0	0	0	0	0	0	0	0	0	1397	1425	291	0.55	-0.16	0.98	0.92
hSQ028043	NM_175614	NDUFA11	126328	0.77	15.69	52.27	-1.08	-0.48	-0.16	92.38	100	2.39	2.29	-1.37	14.69	39.58	0.99	0.96	0.92	108.17	100	5.7	6.45	0	1	0	0	0	0	0	0	0	0	0	0	0	0	0	67	426	306	0.6	-0.11	0.96	1.13
hSQ030940	NM_024754	PTCD2	79810	0.77	15.69	52.28	-2.35	-1.76	0.17	90.93	100	0.13	0.21	-2.58	14.69	22.27	0.91	0.84	0.29	108.17	100	5.44	5.67	0	0	0	0	0	0	1	0	0	0	NA	NA	NA	NA	NA	925	1167	NA	0.59	0.08	0.93	1.04
hSQ001467	NA	TMEM205	374882	0.77	15.69	52.3	-1.05	-0.56	0.07	90.93	100	1.23	1.27	-2.06	14.69	28.45	0.95	0.9	0.36	108.17	100	5.03	5.23	NA	NA	NA	NA	NA	NA	NA	NA	NA	NA	NA	NA	NA	NA	NA	NA	NA	NA	0.49	0.03	0.94	1.04
hSQ027595	NM_000942	PPIB	5479	0.77	15.69	52.36	-1.2	-0.63	-0.44	92.38	100	0.88	0.6	-1.92	14.69	30.42	0.95	0.9	0.81	108.17	100	6.13	6.93	0	0	0	0	0	0	0	0	0	0	0	0	0	0	0	207	651	169	0.57	-0.28	0.95	1.13
hSQ008624	NM_001357	DHX9	1660	0.77	15.69	52.37	-1.38	-0.8	-0.03	92.38	100	1.72	1.71	-0.4	21.69	55.96	0.86	0.84	1.01	108.17	100	8.19	8.99	1	0	0	0	0	0	0	0	0	0	0	0	0	0	0	313	3813	163	0.58	-0.02	0.97	1.1
hSQ029023	NM_001035521	GTF3C2	2976	0.76	15.69	52.39	-1.75	-1.1	0.02	90.93	100	1.29	1.29	-2.56	14.69	22.5	0.94	0.87	0.74	108.17	100	5.91	6.31	1	0	0	0	0	1	2	1	1	1	0	0	0	0	0	819	2736	287	0.64	0.01	0.93	1.07
hSQ012923	NM_022763	FNDC3B	64778	0.76	15.69	52.4	0.91	2	-0.56	92.38	100	-2.87	-3.18	0.07	29.81	60.4	0.89	0.9	-0.88	108.64	100	6.89	5.83	2	3	0	0	0	3	2	1	0	0	0	0	0	0	0	3221	3615	54	1.09	-0.32	1	0.85
hSQ004691	NM_001034833	NOLA2	55651	0.76	15.69	52.4	-1.04	-0.52	-0.09	92.38	100	3.33	3.28	-4.06	9.63	15.25	0.97	0.88	0.15	108.17	100	4.19	4.32	0	1	0	0	0	0	0	0	0	0	0	0	0	0	0	329	273	143	0.52	-0.05	0.91	1.03
hSQ026348	NM_007043	KRR1	11103	0.76	15.69	52.4	-2.52	-1.99	0.36	84.11	98.02	1.64	1.83	-1.14	14.69	43.85	0.95	0.92	-0.49	108.64	100	6.46	5.95	2	0	0	1	0	0	0	0	0	0	NA	NA	NA	NA	NA	2168	1146	NA	0.53	0.19	0.97	0.92
hSQ025247	NM_001099285	PTMA	5757	0.76	15.69	52.49	-0.08	0.58	0.13	90.93	100	2.05	2.1	-1.01	14.69	46.13	0.99	0.97	-0.48	108.64	100	6.94	6.32	0	0	0	0	0	0	0	0	0	0	0	0	0	0	0	689	336	182	0.66	0.05	0.97	0.91
hSQ038524	NM_015963	THAP4	51078	0.76	15.69	52.49	-0.71	-0.22	-0.14	92.38	100	1.12	1.06	-0.96	14.69	47.13	0.91	0.88	0.11	108.17	100	5.1	5.15	0	1	0	0	0	0	0	0	0	0	0	0	0	0	0	200	1734	223	0.5	-0.06	0.96	1.01
hSQ029368	NM_001357	DHX9	1660	0.76	15.69	52.53	-0.79	-0.28	0.03	90.93	100	1.15	1.16	-0.19	21.69	58.39	0.83	0.82	-0.22	108.64	100	7.87	7.65	1	0	0	0	0	0	0	0	0	0	0	0	0	0	0	313	3813	163	0.51	0.02	0.99	0.97
hSQ038563	NM_033082	CIP29	84324	0.76	15.69	52.54	-0.42	0.03	-0.04	92.38	100	1.73	1.72	-2.01	14.69	29.12	0.97	0.93	-0.14	108.64	100	6.25	6.15	0	1	0	0	0	0	0	0	0	0	NA	NA	NA	NA	NA	238	633	NA	0.45	-0.02	0.96	0.99
hSQ028129	NM_175069	APTX	54840	0.76	15.69	52.55	0.59	1.19	-0.01	92.38	100	1.95	1.95	-1.86	14.69	31.3	0.94	0.88	-0.02	108.64	100	5.56	5.55	1	0	0	0	0	1	0	0	1	0	NA	NA	NA	NA	NA	1073	921	NA	0.6	-0.01	0.93	1
hSQ021928	NM_001080485	ZNF275	10838	0.76	15.69	52.56	0.24	1	0.04	90.93	100	1.25	1.27	-0.92	14.69	47.79	0.93	0.89	-0.19	108.64	100	5.03	4.9	1	0	0	0	0	1	0	0	0	0	NA	NA	NA	NA	NA	3612	1458	NA	0.76	0.02	0.96	0.98
hSQ003930	NM_004583	RAB5C	5878	0.76	15.69	52.56	0.12	0.72	-0.07	92.38	100	1.47	1.43	0.1	29.81	60.5	0.88	0.89	-0.19	108.64	100	6.66	6.41	0	0	0	0	0	0	0	0	0	0	0	1	0	0	0	803	651	200	0.6	-0.04	1	0.96
hSQ024484	NM_199414	PRC1	9055	0.76	15.69	52.58	1.91	2.51	0.47	84.11	93.38	2.44	2.71	-1.61	14.69	35.49	0.97	0.93	0.47	108.17	100	9.12	9.46	0	2	0	0	0	1	1	0	0	0	0	0	0	0	0	1131	1701	157	0.6	0.27	0.96	1.04
hSQ031757	NM_000320	QDPR	5860	0.76	15.69	52.63	1.29	1.81	-0.02	92.38	100	0.04	0.03	-0.61	21.69	53	0.9	0.88	0.35	108.17	100	4.73	4.93	1	1	0	1	0	0	0	0	0	0	NA	NA	NA	NA	NA	731	735	NA	0.52	-0.01	0.98	1.04
hSQ034226	NM_014953	DIS3	22894	0.76	15.69	52.64	-2.4	-1.85	-0.35	92.38	100	2.38	2.22	0.56	29.81	60.66	0.87	0.89	0.41	108.17	100	7.22	7.54	4	2	2	1	0	1	0	0	0	0	NA	NA	NA	NA	NA	4392	2877	NA	0.55	-0.16	1.02	1.04
hSQ044035	NM_025267	AARSD1	80755	0.76	15.69	52.66	-1.39	-0.88	0.45	84.11	94.52	1.93	2.15	-2.15	14.69	27.25	0.86	0.79	0.34	108.17	100	5.9	6.17	0	0	0	0	0	0	0	0	0	0	0	0	0	0	0	65	1578	145	0.51	0.21	0.92	1.05
hSQ009997	NM_012474	UCK2	7371	0.76	15.69	52.68	-1.38	-0.83	-0.34	92.38	100	2.33	2.2	-1.7	14.69	34	0.94	0.9	0.48	108.17	100	5.73	6.11	1	0	0	0	0	2	0	0	0	0	0	0	0	0	0	277	786	181	0.55	-0.13	0.96	1.07
hSQ033153	NM_018233	OGFOD1	55239	0.76	15.69	52.7	-0.26	0.25	-0.42	92.38	100	1.05	0.89	-1.35	14.69	40	0.93	0.9	-1.21	71.06	98.89	8.22	7.65	1	0	0	0	0	1	0	0	0	0	1	1	1	0	0	1289	1629	101	0.51	-0.16	0.97	0.93
hSQ008574	NM_003010	MAP2K4	6416	0.76	15.69	52.7	3.63	4.18	-0.07	92.38	100	1.99	1.95	1.21	26.68	54.57	0.75	0.84	0.2	108.17	100	3.91	4.03	5	1	1	1	0	1	1	1	1	1	0	0	0	0	0	2473	1200	69	0.56	-0.04	1.12	1.03
hSQ043468	NA	LOC441756	441756	0.76	15.69	52.73	-1.86	-1.29	-0.33	92.38	100	1.17	0.99	-0.06	21.69	59.52	0.85	0.85	0.98	108.17	100	3.28	3.76	NA	NA	NA	NA	NA	NA	NA	NA	NA	NA	NA	NA	NA	NA	NA	NA	NA	NA	0.57	-0.17	1	1.15
hSQ009887	NM_021140	UTX	7403	0.76	15.69	52.77	1.53	2.16	-0.49	92.38	100	1.11	0.82	-0.04	21.69	59.72	0.89	0.89	0.47	108.17	100	4.67	4.9	0	0	0	0	0	4	3	1	1	1	NA	NA	NA	NA	NA	1187	4206	NA	0.63	-0.29	1	1.05
hSQ027469	NM_001798	CDK2	1017	0.76	15.69	52.83	-1.81	-1.22	-0.72	84.11	100	0.85	0.42	-2.04	14.69	28.66	0.96	0.9	-1.57	44.12	80.13	6.65	5.95	1	1	0	1	0	0	0	0	0	0	0	0	0	0	0	1158	897	234	0.59	-0.43	0.94	0.9
hSQ045536	NM_001042589	C9orf127	51754	0.76	15.69	52.85	0.29	0.84	-0.31	92.38	100	0.54	0.35	1.46	23.79	50.65	0.69	0.83	0.07	108.17	100	3.54	3.57	1	0	0	0	0	0	0	0	0	0	0	2	0	0	0	1006	1419	1015	0.55	-0.18	1.19	1.01
hSQ014496	NM_152422	PTPDC1	138639	0.76	15.69	52.87	1.23	1.85	-0.43	92.38	100	-1.31	-1.49	2.46	19.17	32.45	0.63	0.78	1.06	108.17	100	3.36	3.92	0	1	0	0	0	2	2	1	1	0	0	0	0	0	0	1910	2421	67	0.62	-0.19	1.23	1.17
hSQ028833	NM_016607	ARMCX3	51566	0.76	15.69	52.87	-2.04	-1.17	-0.63	91.61	100	-0.41	-0.75	1.41	25.16	51.53	0.59	0.75	-0.23	108.64	100	5.44	5.22	0	0	0	0	0	0	0	0	0	0	0	0	0	0	0	1722	1140	533	0.87	-0.34	1.25	0.96
hSQ022243	NM_001259	CDK6	1021	0.76	15.69	52.93	1.8	2.66	-1.22	25.69	77.83	-3.5	-4.11	0.21	29.81	60.92	0.91	0.92	-0.44	108.64	100	5.13	4.65	6	8	2	2	0	0	0	0	0	0	0	0	0	0	0	10208	981	393	0.86	-0.61	1.01	0.9
hSQ007697	NM_001039583	PICK1	9463	0.76	15.69	52.94	-0.92	-0.32	0.08	90.93	100	1.74	1.78	-1.5	14.69	37.35	0.87	0.76	0.82	108.17	100	6.14	6.58	1	0	0	1	0	0	1	0	0	0	0	0	0	0	0	568	1248	292	0.59	0.04	0.87	1.07
hSQ017608	NM_015680	C2orf24	27013	0.76	15.69	52.95	1	1.72	-0.54	92.38	100	0.31	-0.11	-0.29	21.69	57.37	0.78	0.76	-0.11	108.64	100	6.61	6.52	0	0	0	0	0	1	0	0	0	0	0	0	0	0	0	688	1233	137	0.71	-0.42	0.98	0.99
hSQ015301	NM_004265	FADS2	9415	0.76	15.69	52.96	-0.17	0.32	-0.32	92.38	100	-1.33	-1.52	0.56	29.81	60.66	0.87	0.89	-0.01	108.64	100	6.55	6.54	1	1	0	0	0	1	1	0	0	0	0	0	0	0	0	1664	1335	150	0.48	-0.19	1.02	1
hSQ009480	NM_020943	KIAA1604	57703	0.76	15.69	52.98	-2.07	-1.57	0.49	84.11	92.91	0.32	0.57	-0.96	14.69	47.14	0.95	0.91	-0.26	108.64	100	7.84	7.68	1	0	0	1	0	0	0	0	0	0	0	0	0	0	0	252	2727	300	0.5	0.25	0.95	0.98
hSQ015272	NM_002552	ORC4L	5000	0.76	15.69	52.99	-1.87	-1.32	0.37	84.11	97.56	1.42	1.6	-0.66	21.69	52.14	0.91	0.9	0.02	108.17	100	6.93	6.95	1	0	0	0	0	1	1	1	0	0	0	0	0	0	0	1346	1311	160	0.55	0.18	0.98	1
hSQ039442	NM_001024674	C14orf46	91750	0.76	15.69	53	-1.16	-0.54	0.03	90.93	100	2.09	2.1	-0.22	21.69	58.12	0.88	0.86	0	108.17	100	3.4	3.4	0	0	0	0	0	0	1	0	0	0	0	0	0	0	0	58	351	167	0.63	0.01	0.98	1
hSQ020207	NM_182926	KTN1	3895	0.75	15.69	53.04	-2.27	-1.76	0.19	90.93	100	0.01	0.09	-0.96	14.69	47.1	0.96	0.93	1.38	85.33	100	5.79	6.54	0	0	0	0	0	0	0	0	0	0	0	0	0	0	0	536	4074	302	0.51	0.08	0.96	1.13
hSQ028245	NM_000097	CPOX	1371	0.75	15.69	53.17	-0.21	0.28	-0.96	43.3	96.12	1.45	1.03	-2.78	14.69	20.52	0.96	0.88	0.25	108.17	100	6.92	7.08	1	1	1	1	1	0	0	0	0	0	0	0	0	0	0	1235	1365	93	0.49	-0.41	0.92	1.02
hSQ009697	NM_006608	PHTF1	10745	0.75	15.69	53.18	1.23	2.03	-1.08	35.24	88.16	0.3	-0.27	0.84	29.12	58.81	0.86	0.89	-0.09	108.64	100	3.91	3.85	0	0	0	0	0	1	1	1	1	1	NA	NA	NA	NA	NA	475	2289	NA	0.79	-0.57	1.03	0.98
hSQ000102	NM_033034	TRIM5	85363	0.75	15.69	53.2	-0.18	0.7	-0.73	84.11	100	-2.01	-2.41	1.98	21.91	41.36	0.71	0.86	-0.46	108.64	100	6.93	6.6	1	0	0	0	0	0	0	0	0	0	0	0	0	0	0	1251	1482	257	0.88	-0.4	1.21	0.95
hSQ043216	NM_001039848	GPX4	2879	0.75	15.69	53.23	-1.64	-1.01	0.2	90.93	100	1.43	1.54	0.08	29.81	60.43	0.84	0.85	0.33	108.17	100	3.18	3.4	0	0	0	0	0	0	0	0	0	0	0	0	0	0	0	215	705	85	0.64	0.11	1.01	1.07
hSQ017812	NA	LOC390488	390488	0.75	15.69	53.31	-1.42	-0.86	0.49	84.11	92.58	0.28	0.66	0.96	28.01	57.61	0.45	0.54	0.09	108.17	100	4.2	4.27	NA	NA	NA	NA	NA	NA	NA	NA	NA	NA	NA	NA	NA	NA	NA	NA	NA	NA	0.56	0.38	1.21	1.02
hSQ018895	NA	LOC402100	402100	0.75	15.69	53.34	-0.61	0.05	-0.32	92.38	100	2.26	2.06	-3.27	9.63	17.44	0.89	0.72	0.18	108.17	100	5.75	6.06	NA	NA	NA	NA	NA	NA	NA	NA	NA	NA	NA	NA	NA	NA	NA	NA	NA	NA	0.66	-0.2	0.8	1.05
hSQ039313	NM_016479	SHISA5	51246	0.75	15.69	53.34	1.65	2.23	-0.43	92.38	100	1.83	1.52	-0.17	21.69	58.58	0.9	0.9	0.2	108.17	100	3.67	3.79	0	0	0	0	0	1	2	0	0	0	0	0	0	0	0	1309	723	134	0.58	-0.3	0.99	1.03
hSQ038525	NM_002537	OAZ2	4947	0.75	15.69	53.35	-1.22	-0.75	0.1	90.93	100	0.86	0.91	-1.85	14.69	31.57	0.94	0.9	-0.33	108.64	100	4.8	4.57	0	0	0	0	0	1	0	0	0	0	0	0	0	0	0	1127	571	207	0.46	0.05	0.95	0.95
hSQ009817	NM_022371	TOR3A	64222	0.75	15.69	53.36	-1.32	-0.79	-0.78	65.69	100	1.73	1.38	-1.89	14.69	30.9	0.96	0.91	0.65	108.17	100	4.19	4.59	2	1	1	1	1	2	0	0	0	0	0	0	0	0	0	774	1194	152	0.52	-0.36	0.94	1.09
hSQ030512	NA	XM_498233	442342	0.75	15.69	53.36	-1.85	-1.32	0.1	90.93	100	2.04	2.08	-0.69	21.69	51.73	0.89	0.88	0.6	108.17	100	6.13	6.48	NA	NA	NA	NA	NA	NA	NA	NA	NA	NA	NA	NA	NA	NA	NA	NA	NA	NA	0.54	0.04	0.98	1.06
hSQ015177	NM_030811	MRPS26	64949	0.75	15.69	53.44	-0.58	-0.03	0.13	90.93	100	2.37	2.44	-0.84	19.17	49.29	0.96	0.94	-0.49	108.64	100	5.77	5.45	0	1	0	0	0	0	0	0	0	0	NA	NA	NA	NA	NA	380	618	NA	0.55	0.07	0.98	0.94
hSQ023997	NM_016579	CD320	51293	0.75	15.69	53.44	-0.73	-0.21	0.29	84.11	100	1.32	1.46	-1.12	14.69	44.29	0.95	0.91	1.49	85.33	100	4.84	5.47	0	0	0	0	0	0	0	0	0	0	0	0	0	0	0	336	849	65	0.52	0.14	0.96	1.13
hSQ036419	NM_001017371	SP3	6670	0.75	15.69	53.47	-3.39	-2.79	-0.21	92.38	100	-0.94	-1.09	2.8	9.63	26.48	0.65	0.82	0.08	108.17	100	5.03	5.12	1	0	0	1	0	0	1	0	0	0	0	0	0	0	0	1410	2142	384	0.6	-0.15	1.25	1.02
hSQ005479	NM_020195	C14orf124	56948	0.75	15.69	53.48	-0.96	-0.43	-0.27	92.38	100	2.23	2.12	-3.84	9.63	15.62	0.85	0.78	0.67	108.17	100	4.66	5.06	0	0	0	0	0	1	0	0	1	0	NA	NA	NA	NA	NA	315	882	NA	0.53	-0.11	0.92	1.09
hSQ043206	NM_003310	TSSC1	7260	0.75	15.69	53.55	-2.47	-1.61	0.03	90.93	100	1.26	1.27	-1.4	14.69	39.11	0.93	0.88	0.63	108.17	100	4.41	4.85	0	0	0	0	0	1	1	1	1	1	0	0	0	0	0	362	1164	138	0.86	0.02	0.95	1.1
hSQ030508	NM_016302	CRBN	51185	0.75	15.69	53.58	-1.22	-0.6	-0.23	92.38	100	0.46	0.34	-0.63	21.69	52.62	0.85	0.82	-0.85	108.64	100	5.91	5.37	0	1	0	0	0	1	0	0	0	0	NA	NA	NA	NA	NA	851	1329	NA	0.63	-0.13	0.97	0.91
hSQ001672	NM_001760	CCND3	896	0.75	15.69	53.6	0.06	0.59	0.34	84.11	98.91	-0.21	-0.03	0.05	29.81	60.25	0.88	0.88	-0.26	108.64	100	5.54	5.36	1	1	1	0	0	0	1	0	0	0	1	0	0	0	0	1006	879	165	0.53	0.18	1	0.97
hSQ020806	NA	KCNJ12::FLJ14167	3768::92080	0.75	15.69	53.62	2.31	2.97	0.08	90.93	100	2.15	2.19	2.15	21.69	38.29	0.8	0.84	0.06	108.17	100	4.12	4.16	NA	NA	NA	NA	NA	NA	NA	NA	NA	NA	NA	NA	NA	NA	NA	NA	NA	NA	0.66	0.04	1.06	1.01
hSQ039187	NM_032731	TXNDC17	84817	0.75	15.69	53.63	-0.71	-0.17	0.02	90.93	100	2.27	2.28	-1.5	14.69	37.4	1	0.96	0.56	108.17	100	4.2	4.58	1	2	1	1	1	0	1	0	0	0	0	0	0	0	0	1522	372	181	0.54	0.01	0.96	1.09
hSQ001579	NA	EST_AA496936	repname(hSQ001579)	0.75	15.69	53.65	2.14	2.71	-0.19	92.38	100	-0.15	-0.24	-1.2	14.69	42.72	0.97	0.93	-0.12	108.64	100	7.31	7.17	NA	NA	NA	NA	NA	NA	NA	NA	NA	NA	NA	NA	NA	NA	NA	NA	NA	NA	0.56	-0.09	0.96	0.98
hSQ017128	NM_006811	SERINC3	10955	0.75	15.69	53.67	-0.98	-0.47	0.5	84.11	92.4	-0.49	-0.27	0.38	29.81	61.07	0.87	0.89	-0.45	108.64	100	5.83	5.62	0	0	0	0	0	0	1	0	0	0	0	0	0	0	0	1036	1422	134	0.51	0.22	1.01	0.96
hSQ027003	NM_017444	CHRAC1	54108	0.74	15.69	53.72	-1.91	-1.38	-0.52	92.38	100	0.78	0.54	0.46	29.81	60.95	0.78	0.84	0.27	108.17	100	3.09	3.25	0	0	0	0	0	0	0	0	0	0	0	0	0	0	0	1906	396	195	0.52	-0.25	1.08	1.05
hSQ023276	NM_006083	IK	3550	0.74	15.69	53.74	-1.77	-1.22	0.81	74.83	79.05	1.94	2.24	-1.54	14.69	36.6	0.93	0.89	0.24	108.17	100	9.12	9.42	0	0	0	0	0	0	0	0	0	0	0	0	0	0	0	151	1674	110	0.55	0.31	0.96	1.03
hSQ004193	NM_018983	NOLA1	54433	0.74	15.69	53.78	-1.6	-1.12	-1.15	30.1	83.21	3.33	2.78	-2.05	14.69	28.54	0.95	0.88	-2.21	34.95	47.73	7.37	5.88	0	1	0	0	0	1	1	1	1	1	0	0	0	0	0	304	654	307	0.48	-0.55	0.93	0.8
hSQ012939	NM_002821	PTK7	5754	0.74	15.69	53.81	-1.16	-0.63	-0.96	43.3	96.11	-0.23	-0.64	-0.93	14.69	47.59	0.92	0.89	-2.21	34.95	47.47	7.27	5.94	0	1	0	0	0	1	0	0	0	0	0	0	0	0	0	838	3213	198	0.53	-0.41	0.97	0.82
hSQ028715	NM_018072	HEATR1	55127	0.74	15.69	53.84	1.32	1.93	0.1	90.93	100	0.11	0.18	-1.03	14.69	45.78	0.89	0.86	0.14	108.17	100	7.44	7.53	1	1	1	1	1	2	1	1	0	0	1	0	0	0	0	231	6435	125	0.61	0.07	0.97	1.01
hSQ027198	NM_005817	M6PRBP1	10226	0.74	15.69	53.84	-1.04	-0.6	-0.46	92.38	100	-0.54	-0.79	-1	14.69	46.43	0.96	0.93	-0.2	108.64	100	7.33	7.2	1	0	0	1	0	0	0	0	0	0	0	0	0	0	0	858	1305	73	0.44	-0.26	0.97	0.98
hSQ027513	NM_032864	PRPF38A	84950	0.74	15.69	53.85	-2.15	-1.53	-0.4	92.38	100	1.39	1.13	-0.15	21.69	58.82	0.74	0.72	-0.13	108.64	100	5.79	5.68	0	0	0	0	0	0	0	0	0	0	0	0	0	0	0	1630	939	203	0.61	-0.27	0.98	0.98
hSQ005402	NM_006407	ARL6IP5	10550	0.74	15.69	53.91	-1.52	-1.03	0.18	90.93	100	1.68	1.78	-1.69	14.69	34.04	0.98	0.93	-0.05	108.64	100	5.6	5.57	1	0	0	0	0	0	0	0	0	0	0	0	0	0	0	1450	567	109	0.49	0.09	0.95	0.99
hSQ022717	NM_139207	NAP1L1	4673	0.74	15.69	53.92	-1.45	-0.9	-0.51	92.38	100	1.15	0.87	-0.72	19.17	51.18	0.88	0.84	-0.2	108.64	100	8.23	7.93	1	1	1	0	0	0	0	0	0	0	0	0	0	0	0	2251	1176	124	0.54	-0.28	0.95	0.96
hSQ003753	NM_004905	PRDX6	9588	0.74	15.69	53.93	-0.53	-0.01	0.41	84.11	95.83	2.3	2.49	-1.45	14.69	38.2	0.98	0.95	-1.31	59.85	94.37	8.12	6.48	2	1	1	0	0	0	0	0	0	0	0	0	0	0	0	945	675	51	0.52	0.19	0.96	0.8
hSQ021110	NM_020642	C11orf17	56672	0.74	15.69	53.94	-0.79	-0.33	0.18	90.93	100	1.15	1.24	-2.6	14.69	22.1	0.89	0.82	0.08	108.17	100	4.75	4.8	1	1	1	0	0	0	0	0	0	0	0	0	0	0	0	597	633	76	0.46	0.08	0.92	1.01
hSQ025012	NM_006067	COX4NB	10328	0.74	15.69	53.97	-1.09	-0.56	0.05	90.93	100	1.17	1.19	-1.35	14.69	40.02	0.95	0.91	0.25	108.17	100	4.82	4.99	1	2	1	0	0	0	0	0	0	0	0	0	0	0	0	1078	633	199	0.53	0.02	0.96	1.04
[truncated: 11,207 more rows]
