# Supplementary material for: Concordant Regulation of Translation and mRNA Abundance for Hundreds of Targets of a Human microRNA
Source: PLOS journal article supplement (doi:10.1371/journal.pbio.1000238), 2009-11-09

A

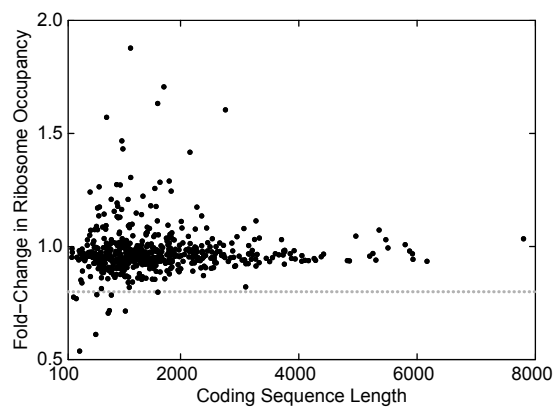

B

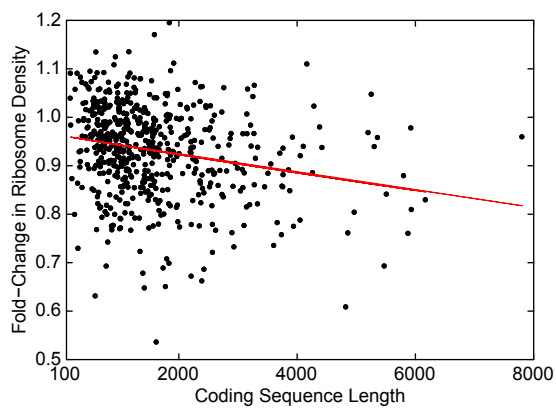

Supplement: S10 (10.1371/journal.pbio.1000238.s010) [file journal.pbio.1000238.s010]
